# Supplementary material for: Glucose-dependent miR-125b is a negative regulator of β-cell function
Source: bioRxiv preprint, doi:10.1101/2021.05.17.444559, version 3 (2022-03-09)
Supplement: Sup Table 1 [file 444559_file03.xlsx]

## Sheet: Results_allgenes_T-RNAseq
Supplemental Table 1. T-RNA: Gene Expression for all detected genes; Fold change in MIN6 cells transfected with miR-125b mimics vs control.
Gene.stable.ID	Gene_Id_DeSeq2	baseMean	log2FoldChange	lfcSE	stat	pvalue	padj	Gene.name
ENSMUSG00000000001	ENSMUSG00000000001.4	7044.87	0.215575	0.0828075	2.60333	0.00923231	0.146915	Gnai3
ENSMUSG00000000028	ENSMUSG00000000028.14	2585.53	0.288628	0.0796563	3.62342	0.000290734	0.0165372	Cdc45
ENSMUSG00000000037	ENSMUSG00000000037.16	337.68	-0.270549	0.137299	-1.97051	0.0487801	0.356386	Scml2
ENSMUSG00000000056	ENSMUSG00000000056.7	980.644	0.0273399	0.145981	0.187284	0.851438	0.969606	Narf
ENSMUSG00000000078	ENSMUSG00000000078.6	601.425	-0.0943253	0.131081	-0.719595	0.471775	0.841277	Klf6
ENSMUSG00000000085	ENSMUSG00000000085.16	1752.82	0.0121169	0.10245	0.118271	0.905853	0.982338	Scmh1
ENSMUSG00000000088	ENSMUSG00000000088.7	6676.8	0.323918	0.111498	2.90515	0.00367076	0.0863857	Cox5a
ENSMUSG00000000120	ENSMUSG00000000120.6	3208.43	-0.648529	0.134281	-4.82965	1.37e-06	0.000365646	Ngfr
ENSMUSG00000000126	ENSMUSG00000000126.11	149.274	-0.176575	0.13153	-1.34246	0.179445	0.623409	Wnt9a
ENSMUSG00000000127	ENSMUSG00000000127.14	555.558	0.0757482	0.0924516	0.819328	0.412599	0.8062	Fer
ENSMUSG00000000131	ENSMUSG00000000131.15	7559.61	-0.0845348	0.129778	-0.65138	0.514801	0.862556	Xpo6
ENSMUSG00000000134	ENSMUSG00000000134.17	1880.09	0.0819339	0.0690549	1.1865	0.235423	0.683811	Tfe3
ENSMUSG00000000142	ENSMUSG00000000142.15	167.515	-0.172788	0.106107	-1.62843	0.103435	0.499892	Axin2
ENSMUSG00000000148	ENSMUSG00000000148.17	794.482	-0.158038	0.0690537	-2.28863	0.0221011	0.236909	Brat1
ENSMUSG00000000149	ENSMUSG00000000149.10	1445.8	0.0435008	0.0805116	0.540304	0.588987	0.894745	Gna12
ENSMUSG00000000167	ENSMUSG00000000167.14	114.697	-0.0777112	0.121622	-0.638957	0.522851	0.867042	Pih1d2
ENSMUSG00000000168	ENSMUSG00000000168.9	2053.98	0.0206129	0.0836638	0.246378	0.80539	0.957968	Dlat
ENSMUSG00000000171	ENSMUSG00000000171.5	5361.19	0.222514	0.0859696	2.58829	0.00964539	0.150443	Sdhd
ENSMUSG00000000184	ENSMUSG00000000184.12	2773.94	-0.0505124	0.143209	-0.352718	0.7243	0.937928	Ccnd2
ENSMUSG00000000194	ENSMUSG00000000194.13	1953.5	0.164461	0.0677022	2.42918	0.0151331	0.192836	Gpr107
ENSMUSG00000000197	ENSMUSG00000000197.7	900.777	-0.0358651	0.107684	-0.333057	0.739091	0.940232	Nalcn
ENSMUSG00000000202	ENSMUSG00000000202.9	979.908	-0.0412899	0.0746697	-0.552968	0.580286	0.892821	Btbd17
ENSMUSG00000000214	ENSMUSG00000000214.11	1025.05	0.0988506	0.145266	0.680483	0.496199	0.853814	Th
ENSMUSG00000000215	ENSMUSG00000000215.11	509130	-0.0619261	0.125479	-0.493519	0.621646	0.907988	Ins2
ENSMUSG00000000216	ENSMUSG00000000216.8	126.951	-0.0476377	0.122422	-0.389126	0.697183	0.933418	Scnn1g
ENSMUSG00000000223	ENSMUSG00000000223.13	48.128	-0.0478385	0.145898	-0.32789	0.742995	0.940717	Drp2
ENSMUSG00000000247	ENSMUSG00000000247.11	522.92	-0.107469	0.134402	-0.799606	0.423939	0.813996	Lhx2
ENSMUSG00000000253	ENSMUSG00000000253.12	1877.97	0.0059513	0.144905	0.0410704	0.96724	0.995086	Gmpr
ENSMUSG00000000266	ENSMUSG00000000266.11	1229.76	-0.0157159	0.0934397	-0.168193	0.866431	0.974471	Mid2
ENSMUSG00000000275	ENSMUSG00000000275.16	1664.32	-0.155116	0.0643758	-2.40954	0.0159725	0.19824	Trim25
ENSMUSG00000000276	ENSMUSG00000000276.11	1362.59	-0.101898	0.100754	-1.01136	0.311846	0.745302	Dgke
ENSMUSG00000000278	ENSMUSG00000000278.10	9725.69	0.194222	0.106745	1.81949	0.0688366	0.42107	Scpep1
ENSMUSG00000000282	ENSMUSG00000000282.12	1028.84	-0.0571957	0.121019	-0.472616	0.636487	0.912525	Mnt
ENSMUSG00000000295	ENSMUSG00000000295.13	489.67	-0.0970221	0.1179	-0.82292	0.410554	0.804083	Hddc2
ENSMUSG00000000296	ENSMUSG00000000296.8	78.8708	-0.00244868	0.139833	-0.0175115	0.986029	0.997899	Tpd52l1
ENSMUSG00000000301	ENSMUSG00000000301.16	301.645	0.0438471	0.0986805	0.444334	0.656801	0.921231	Pemt
ENSMUSG00000000303	ENSMUSG00000000303.12	11855	0.113443	0.0983997	1.15288	0.248961	0.696015	Cdh1
ENSMUSG00000000305	ENSMUSG00000000305.12	6364.84	0.160148	0.103237	1.55126	0.120838	0.533437	Cdh4
ENSMUSG00000000308	ENSMUSG00000000308.14	2811.82	0.14222	0.112196	1.2676	0.20494	0.653023	Ckmt1
ENSMUSG00000000317	ENSMUSG00000000317.11	736.697	-0.0231759	0.0740805	-0.312847	0.754397	0.944073	Bcl6b
ENSMUSG00000000325	ENSMUSG00000000325.15	918.402	0.0545539	0.0739215	0.737998	0.460516	0.833092	Arvcf
ENSMUSG00000000326	ENSMUSG00000000326.12	2767.21	0.0699284	0.108507	0.644461	0.519277	0.864728	Comt
ENSMUSG00000000339	ENSMUSG00000000339.14	1504.15	0.152091	0.0907067	1.67673	0.0935956	0.479713	Rtca
ENSMUSG00000000340	ENSMUSG00000000340.10	509.026	0.112533	0.0883552	1.27365	0.202789	0.65035	Dbt
ENSMUSG00000000346	ENSMUSG00000000346.8	4246.59	-0.339834	0.0768276	-4.42333	9.72e-06	0.00152839	Dazap2
ENSMUSG00000000355	ENSMUSG00000000355.13	1046.35	0.143638	0.0691169	2.07818	0.0376924	0.314792	Mcts1
ENSMUSG00000000374	ENSMUSG00000000374.7	3092.23	-0.0322844	0.0675476	-0.477951	0.632685	0.911817	Trappc10
ENSMUSG00000000378	ENSMUSG00000000378.15	1849.2	0.094669	0.0900532	1.05126	0.293141	0.733373	Ccm2
ENSMUSG00000000384	ENSMUSG00000000384.15	1481.44	0.0367147	0.0891022	0.412052	0.680302	0.928926	Tbrg4
ENSMUSG00000000385	ENSMUSG00000000385.7	550.629	-0.0103361	0.0952106	-0.108561	0.913551	0.983954	Tmprss2
ENSMUSG00000000386	ENSMUSG00000000386.14	86.1592	-0.144942	0.14601	-0.99269	0.320861	0.751482	Mx1
ENSMUSG00000000394	ENSMUSG00000000394.15	30581.6	0.224639	0.128746	1.74482	0.0810154	0.450319	Gcg
ENSMUSG00000000399	ENSMUSG00000000399.10	3155.62	0.130632	0.0969585	1.3473	0.177885	0.620669	Ndufa9
ENSMUSG00000000402	ENSMUSG00000000402.2	150.678	-0.0551161	0.146011	-0.377478	0.705818	0.934791	Egfl6
ENSMUSG00000000409	ENSMUSG00000000409.14	100.517	0.0923052	0.135281	0.682324	0.495034	0.853381	Lck
ENSMUSG00000000416	ENSMUSG00000000416.16	1247.79	-0.325792	0.139227	-2.34	0.0192838	0.218471	Cttnbp2
ENSMUSG00000000420	ENSMUSG00000000420.15	2459.97	0.159213	0.093643	1.70022	0.0890898	0.470378	Galnt1
ENSMUSG00000000439	ENSMUSG00000000439.9	795.848	0.338624	0.0971437	3.48581	0.000490657	0.0235921	Mkrn2
ENSMUSG00000000440	ENSMUSG00000000440.12	102.28	-0.0011581	0.141795	-0.00816744	0.993483	0.998555	Pparg
ENSMUSG00000000441	ENSMUSG00000000441.17	3017.91	0.120863	0.104752	1.1538	0.248583	0.696015	Raf1
ENSMUSG00000000531	ENSMUSG00000000531.4	204.636	-0.077081	0.112662	-0.684178	0.493863	0.852903	Grasp
ENSMUSG00000000532	ENSMUSG00000000532.10	807.543	-0.0801621	0.0828049	-0.968084	0.333002	0.758648	Acvr1b
ENSMUSG00000000538	ENSMUSG00000000538.18	3523.6	0.102087	0.0629282	1.62228	0.104744	0.501847	Tom1l2
ENSMUSG00000000544	ENSMUSG00000000544.14	165.625	-0.199407	0.143917	-1.38556	0.16588	0.605102	Gpa33
ENSMUSG00000000552	ENSMUSG00000000552.9	318.145	-0.44467	0.116158	-3.82813	0.000129119	0.009751	Zfp385a
ENSMUSG00000000561	ENSMUSG00000000561.14	2368.82	0.0779494	0.0796812	0.978267	0.327942	0.754804	Wdr77
ENSMUSG00000000563	ENSMUSG00000000563.17	11719.2	0.186482	0.086457	2.15693	0.031011	0.282519	Atp5f1
ENSMUSG00000000568	ENSMUSG00000000568.15	6658.29	0.113406	0.0747473	1.51719	0.129218	0.548334	Hnrnpd
ENSMUSG00000000579	ENSMUSG00000000579.14	1240.86	-0.0194855	0.101934	-0.191158	0.848402	0.968843	Dynlt1c
ENSMUSG00000000581	ENSMUSG00000000581.8	1095.91	-0.0516367	0.092928	-0.555664	0.578441	0.892225	C1d
ENSMUSG00000000594	ENSMUSG00000000594.7	1839.8	-0.00711811	0.06485	-0.109763	0.912598	0.983954	Gm2a
ENSMUSG00000000600	ENSMUSG00000000600.15	1809.56	-0.0432322	0.0812566	-0.532046	0.594694	0.896527	Krit1
ENSMUSG00000000605	ENSMUSG00000000605.9	3043.36	-0.193656	0.0678754	-2.85311	0.00432938	0.0959765	Clcn4
ENSMUSG00000000627	ENSMUSG00000000627.15	412.193	0.19415	0.095713	2.02846	0.0425128	0.333069	Sema4f
ENSMUSG00000000631	ENSMUSG00000000631.20	2809.39	0.0248979	0.120484	0.206649	0.836284	0.965089	Myo18a
ENSMUSG00000000632	ENSMUSG00000000632.13	1773.03	-0.103607	0.145664	-0.711276	0.476914	0.843045	Sez6
ENSMUSG00000000686	ENSMUSG00000000686.11	834.522	0.00429462	0.143333	0.0299625	0.976097	0.996296	Abhd15
ENSMUSG00000000693	ENSMUSG00000000693.10	39.1034	-0.357673	0.145652	-2.45567	0.014062	0.185007	Loxl3
ENSMUSG00000000708	ENSMUSG00000000708.14	1564.52	-0.111465	0.0701027	-1.59002	0.11183	0.517065	Kat2b
ENSMUSG00000000711	ENSMUSG00000000711.2	3741.58	-0.0810677	0.0502657	-1.61278	0.106792	0.5071	Rab5b
ENSMUSG00000000732	ENSMUSG00000000732.8	141.8	-0.249542	0.134324	-1.85776	0.0632033	0.404949	Icosl
ENSMUSG00000000738	ENSMUSG00000000738.18	3168.92	-0.0598632	0.0851592	-0.702956	0.482083	0.846451	Spg7
ENSMUSG00000000739	ENSMUSG00000000739.14	40.7911	0.101395	0.143786	0.70518	0.480698	0.846451	Sult5a1
ENSMUSG00000000740	ENSMUSG00000000740.12	12980.9	0.077147	0.121249	0.63627	0.5246	0.867774	Rpl13
ENSMUSG00000000743	ENSMUSG00000000743.9	2796.9	0.0499558	0.0688967	0.725082	0.468402	0.838976	Chmp1a
ENSMUSG00000000751	ENSMUSG00000000751.13	8488.38	0.138321	0.0693966	1.9932	0.0462401	0.346275	Rpa1
ENSMUSG00000000759	ENSMUSG00000000759.14	2141.25	0.0731286	0.0655547	1.11553	0.264622	0.707886	Tubgcp3
ENSMUSG00000000776	ENSMUSG00000000776.12	886.98	0.0843579	0.0782001	1.07874	0.280702	0.721619	Polr3d
ENSMUSG00000000787	ENSMUSG00000000787.12	10308.2	0.0807753	0.119266	0.677273	0.498233	0.854018	Ddx3x
ENSMUSG00000000792	ENSMUSG00000000792.2	207.552	0.143934	0.110614	1.30123	0.19318	0.639447	Slc5a5
ENSMUSG00000000804	ENSMUSG00000000804.14	1333.31	0.0613945	0.131267	0.467708	0.639993	0.914081	Usp32
ENSMUSG00000000811	ENSMUSG00000000811.13	149.239	0.145812	0.124443	1.17172	0.24131	0.689436	Txnrd3
ENSMUSG00000000823	ENSMUSG00000000823.16	1673.77	0.118276	0.122909	0.962308	0.335895	0.759377	Zfp512b
ENSMUSG00000000826	ENSMUSG00000000826.16	4467.28	0.117882	0.0774378	1.52228	0.127939	0.547368	Dnajc5
ENSMUSG00000000827	ENSMUSG00000000827.18	1739.18	-0.0117955	0.0614523	-0.191946	0.847784	0.968759	Tpd52l2
ENSMUSG00000000838	ENSMUSG00000000838.17	2788.28	0.0420955	0.123524	0.340789	0.733262	0.938791	Fmr1
ENSMUSG00000000861	ENSMUSG00000000861.15	157.334	0.0412173	0.141012	0.292296	0.770061	0.949297	Bcl11a
ENSMUSG00000000869	ENSMUSG00000000869.12	373.927	0.101902	0.132261	0.770466	0.441023	0.821346	Il4
ENSMUSG00000000876	ENSMUSG00000000876.11	667.601	0.0936282	0.105318	0.889002	0.374002	0.787458	Pxmp4
ENSMUSG00000000881	ENSMUSG00000000881.12	1278.84	0.138515	0.0857996	1.6144	0.106441	0.506152	Dlg3
ENSMUSG00000000884	ENSMUSG00000000884.16	243.121	0.109169	0.131085	0.832812	0.404951	0.800985	Gnb1l
ENSMUSG00000000889	ENSMUSG00000000889.8	40.2276	-0.00443178	0.136444	-0.0324805	0.974089	0.996035	Dbh
ENSMUSG00000000902	ENSMUSG00000000902.13	2527.41	0.0323476	0.0961293	0.336501	0.736493	0.939196	Smarcb1
ENSMUSG00000000915	ENSMUSG00000000915.15	7877.1	0.148167	0.0912851	1.62313	0.104562	0.501644	Hip1r
ENSMUSG00000000916	ENSMUSG00000000916.15	515.337	0.0544685	0.0868753	0.626973	0.530677	0.869948	Nsun5
ENSMUSG00000000934	ENSMUSG00000000934.8	446.273	0.0984422	0.100916	0.975482	0.329321	0.755901	Top1mt
ENSMUSG00000000948	ENSMUSG00000000948.16	38.9538	0.00198699	0.124057	0.0160167	0.987221	0.998316	Gm38393
ENSMUSG00000000958	ENSMUSG00000000958.9	355.67	-0.209037	0.144545	-1.44617	0.14813	0.580458	Slc7a7
ENSMUSG00000000959	ENSMUSG00000000959.6	1759.86	0.143947	0.0673594	2.137	0.0325981	0.289577	Oxa1l
ENSMUSG00000000976	ENSMUSG00000000976.13	990.8	-0.0659841	0.0902773	-0.730904	0.464838	0.835932	Heatr6
ENSMUSG00000001016	ENSMUSG00000001016.12	3703.21	0.177543	0.0587871	3.0201	0.00252687	0.0675534	Ilf2
ENSMUSG00000001017	ENSMUSG00000001017.15	4702.45	-0.0115548	0.057566	-0.200723	0.840915	0.96667	Chtop
ENSMUSG00000001018	ENSMUSG00000001018.15	902.067	-0.00856177	0.086045	-0.0995033	0.920739	0.985705	Snapin
ENSMUSG00000001020	ENSMUSG00000001020.8	160.342	0.0146564	0.0932536	0.157167	0.875113	0.97593	S100a4
ENSMUSG00000001027	ENSMUSG00000001027.7	53.3198	-0.47028	0.145974	-3.22168	0.00127441	0.0426943	Scn4a
ENSMUSG00000001034	ENSMUSG00000001034.17	1230.64	-0.0696825	0.0949987	-0.73351	0.463247	0.835155	Mapk7
ENSMUSG00000001036	ENSMUSG00000001036.17	1180.53	-0.0308214	0.078703	-0.391617	0.695341	0.933115	Epn2
ENSMUSG00000001039	ENSMUSG00000001039.12	879.074	-0.0499676	0.107671	-0.464076	0.642593	0.914852	B9d1
ENSMUSG00000001052	ENSMUSG00000001052.15	2338.83	0.0155523	0.0830484	0.187268	0.85145	0.969606	Sec24b
ENSMUSG00000001053	ENSMUSG00000001053.15	358.429	-0.0146603	0.0908969	-0.161285	0.871869	0.975692	N4bp3
ENSMUSG00000001054	ENSMUSG00000001054.9	1062.51	0.000533801	0.0868707	0.00614477	0.995097	0.998655	Rmnd5b
ENSMUSG00000001056	ENSMUSG00000001056.3	1100.08	0.258051	0.118309	2.18117	0.0291711	0.273828	Nhp2
ENSMUSG00000001062	ENSMUSG00000001062.18	784.943	-0.0826031	0.0839986	-0.983387	0.325417	0.754238	Vps9d1
ENSMUSG00000001065	ENSMUSG00000001065.15	678.729	-0.0460249	0.0905107	-0.508503	0.611101	0.904473	Zfp276
ENSMUSG00000001082	ENSMUSG00000001082.12	1502.16	-0.084682	0.0860191	-0.984455	0.324892	0.754224	Mfsd10
ENSMUSG00000001089	ENSMUSG00000001089.14	2136.55	0.0607019	0.0934103	0.649842	0.515794	0.863015	Luzp1
ENSMUSG00000001098	ENSMUSG00000001098.15	1432.06	0.162067	0.0754273	2.14866	0.0316617	0.285768	Kctd10
ENSMUSG00000001100	ENSMUSG00000001100.10	1991.93	-0.0358407	0.0871367	-0.411316	0.680841	0.929222	Poldip2
ENSMUSG00000001105	ENSMUSG00000001105.15	1995.91	0.234804	0.0939637	2.49888	0.0124586	0.172754	Ift20
ENSMUSG00000001120	ENSMUSG00000001120.15	2436.51	-0.241781	0.104569	-2.31216	0.0207691	0.228494	Pcbp3
ENSMUSG00000001127	ENSMUSG00000001127.12	3626.3	-0.0306827	0.0729017	-0.420878	0.673844	0.927575	Araf
ENSMUSG00000001128	ENSMUSG00000001128.7	201.369	-0.015521	0.131393	-0.118126	0.905968	0.982338	Cfp
ENSMUSG00000001134	ENSMUSG00000001134.9	653.802	0.05613	0.111484	0.50348	0.614627	0.905841	Uxt
ENSMUSG00000001138	ENSMUSG00000001138.13	806.703	-0.0796653	0.113935	-0.699215	0.484418	0.848425	Cnnm3
ENSMUSG00000001143	ENSMUSG00000001143.13	1409.2	0.214835	0.0954321	2.25118	0.0243738	0.249486	Lman2l
ENSMUSG00000001150	ENSMUSG00000001150.6	1666.44	-0.00356181	0.0785446	-0.0453476	0.96383	0.994356	Mcm3ap
ENSMUSG00000001151	ENSMUSG00000001151.9	1404.44	-0.00114975	0.101262	-0.0113543	0.990941	0.998539	Pcnt
ENSMUSG00000001156	ENSMUSG00000001156.9	440.92	-0.0712786	0.111884	-0.637077	0.524075	0.867549	Mxd1
ENSMUSG00000001157	ENSMUSG00000001157.13	897.565	-0.0826221	0.0771165	-1.07139	0.283992	0.725004	Gmcl1
ENSMUSG00000001158	ENSMUSG00000001158.13	1330.31	0.109685	0.0922359	1.18918	0.234371	0.68322	Snrnp27
ENSMUSG00000001166	ENSMUSG00000001166.17	266.129	-0.0408554	0.134626	-0.303474	0.761529	0.946388	Oas1c
ENSMUSG00000001173	ENSMUSG00000001173.15	2141.01	0.0479289	0.0798056	0.600571	0.548126	0.877475	Ocrl
ENSMUSG00000001175	ENSMUSG00000001175.13	25816.7	-0.0674429	0.101715	-0.663057	0.507294	0.85875	Calm1
ENSMUSG00000001211	ENSMUSG00000001211.14	6709.64	0.144098	0.0914719	1.57533	0.11518	0.522716	Agpat3
ENSMUSG00000001227	ENSMUSG00000001227.11	121.25	-0.229565	0.116834	-1.96488	0.0494279	0.3591	Sema6b
ENSMUSG00000001228	ENSMUSG00000001228.14	4313.38	0.158763	0.0771692	2.05734	0.0396537	0.322987	Uhrf1
ENSMUSG00000001229	ENSMUSG00000001229.7	3839.69	-0.0138912	0.0820802	-0.169239	0.865609	0.974239	Dpp9
ENSMUSG00000001240	ENSMUSG00000001240.13	105.377	0.00977203	0.138774	0.0704168	0.943862	0.98915	Ramp2
ENSMUSG00000001247	ENSMUSG00000001247.16	4646.26	0.018728	0.0707324	0.264772	0.791185	0.954487	Lsr
ENSMUSG00000001248	ENSMUSG00000001248.14	4894.13	-0.140693	0.076311	-1.84368	0.0652302	0.411796	Gramd1a
ENSMUSG00000001260	ENSMUSG00000001260.10	67.818	0.315101	0.145763	2.16174	0.0306384	0.280493	Gabrg1
ENSMUSG00000001270	ENSMUSG00000001270.8	2044.93	0.0487306	0.101455	0.480318	0.631001	0.911457	Ckb
ENSMUSG00000001280	ENSMUSG00000001280.12	2540.28	-0.0888377	0.0923779	-0.961677	0.336212	0.759654	Sp1
ENSMUSG00000001285	ENSMUSG00000001285.12	2292.32	0.113377	0.0990697	1.14442	0.252449	0.698438	Myg1
ENSMUSG00000001288	ENSMUSG00000001288.14	503.549	-0.037214	0.118624	-0.313713	0.753739	0.943904	Rarg
ENSMUSG00000001289	ENSMUSG00000001289.12	4056.01	0.122656	0.110043	1.11462	0.265014	0.708436	Pfdn5
ENSMUSG00000001300	ENSMUSG00000001300.16	232.308	-0.15755	0.0947737	-1.66238	0.0964369	0.486525	Efnb2
ENSMUSG00000001305	ENSMUSG00000001305.5	420.419	-0.0314981	0.0964716	-0.326502	0.744045	0.940717	Rrp15
ENSMUSG00000001313	ENSMUSG00000001313.12	204.923	0.0909215	0.129158	0.703957	0.481459	0.846451	Rnd2
ENSMUSG00000001323	ENSMUSG00000001323.17	575.775	0.0118404	0.134542	0.0880052	0.929873	0.985827	Srr
ENSMUSG00000001366	ENSMUSG00000001366.14	1383.23	-0.00981156	0.0652813	-0.150297	0.880531	0.97663	Fbxo9
ENSMUSG00000001376	ENSMUSG00000001376.17	2191.68	0.0366192	0.0949967	0.385479	0.699883	0.933914	Vps50
ENSMUSG00000001380	ENSMUSG00000001380.6	2835.58	0.196285	0.0648875	3.025	0.00248631	0.0670014	Hars
ENSMUSG00000001383	ENSMUSG00000001383.8	1977.27	0.102399	0.093546	1.09464	0.273675	0.716594	Zmat2
ENSMUSG00000001403	ENSMUSG00000001403.13	6484.14	-0.0506634	0.0899108	-0.563485	0.573105	0.890053	Ube2c
ENSMUSG00000001415	ENSMUSG00000001415.10	3226.28	-0.0658773	0.10108	-0.651731	0.514574	0.862556	Smg5
ENSMUSG00000001416	ENSMUSG00000001416.13	8051.64	0.256416	0.107073	2.39478	0.0166304	0.202349	Cct3
ENSMUSG00000001418	ENSMUSG00000001418.13	4644.25	0.0172972	0.113632	0.15222	0.879013	0.976462	Glmp
ENSMUSG00000001419	ENSMUSG00000001419.17	2773.9	0.0510412	0.0947856	0.538491	0.590238	0.895584	Mef2d
ENSMUSG00000001420	ENSMUSG00000001420.13	51.4242	-0.0118073	0.136692	-0.0863788	0.931165	0.986321	Tmem79
ENSMUSG00000001424	ENSMUSG00000001424.14	10659.8	0.187402	0.106737	1.75574	0.0791334	0.445187	Snd1
ENSMUSG00000001435	ENSMUSG00000001435.14	124.364	-0.0396884	0.144547	-0.274571	0.783646	0.95278	Col18a1
ENSMUSG00000001436	ENSMUSG00000001436.15	413.215	0.00646456	0.089272	0.0724142	0.942272	0.988724	Slc19a1
ENSMUSG00000001440	ENSMUSG00000001440.5	12848.7	0.152039	0.0849728	1.78926	0.0735725	0.431524	Kpnb1
ENSMUSG00000001441	ENSMUSG00000001441.13	4149.02	0.0723299	0.118529	0.610231	0.541709	0.874942	Npepps
ENSMUSG00000001445	ENSMUSG00000001445.10	2684.41	-0.0280688	0.0823882	-0.34069	0.733337	0.938791	Mrpl10
ENSMUSG00000001467	ENSMUSG00000001467.5	4848.55	0.279464	0.13078	2.1369	0.0326057	0.289577	Cyp51
ENSMUSG00000001472	ENSMUSG00000001472.17	11910.8	0.0157505	0.0651918	0.241602	0.809088	0.958353	Tcf25
ENSMUSG00000001473	ENSMUSG00000001473.6	2002.65	-0.115731	0.0781447	-1.48098	0.138612	0.566787	Tubb6
ENSMUSG00000001482	ENSMUSG00000001482.15	2040.85	-0.0813838	0.123838	-0.657178	0.511066	0.860852	Def8
ENSMUSG00000001506	ENSMUSG00000001506.10	57.9221	0.126995	0.145475	0.872965	0.382682	0.790739	Col1a1
ENSMUSG00000001507	ENSMUSG00000001507.16	1819.75	0.239297	0.067662	3.53665	0.000405238	0.0208339	Itga3
ENSMUSG00000001508	ENSMUSG00000001508.15	46.7632	0.324052	0.145268	2.23072	0.0256995	0.256545	Sgca
ENSMUSG00000001517	ENSMUSG00000001517.14	3739.22	-0.0227733	0.110534	-0.206029	0.836768	0.965313	Foxm1
ENSMUSG00000001518	ENSMUSG00000001518.12	855.76	0.0522327	0.0954978	0.546952	0.584412	0.893087	Itfg2
ENSMUSG00000001520	ENSMUSG00000001520.12	37.785	-0.162194	0.145991	-1.11098	0.266576	0.709683	Nrip2
ENSMUSG00000001521	ENSMUSG00000001521.12	1144.15	0.157027	0.0631657	2.48595	0.0129205	0.176955	Tulp3
ENSMUSG00000001524	ENSMUSG00000001524.14	626.778	0.0245524	0.10477	0.234346	0.814717	0.959419	Gtf2h4
ENSMUSG00000001525	ENSMUSG00000001525.10	44820.4	0.132387	0.0854011	1.55018	0.121099	0.533883	Tubb5
ENSMUSG00000001542	ENSMUSG00000001542.6	749.403	-0.213026	0.13401	-1.58963	0.111918	0.517292	Ell2
ENSMUSG00000001552	ENSMUSG00000001552.14	10788.7	0.110449	0.1221	0.904578	0.365689	0.782607	Jup
ENSMUSG00000001566	ENSMUSG00000001566.9	1264.98	-0.152962	0.126444	-1.20972	0.226386	0.675764	Mnx1
ENSMUSG00000001569	ENSMUSG00000001569.10	1199.09	0.0248652	0.0805529	0.308681	0.757564	0.945152	Nom1
ENSMUSG00000001576	ENSMUSG00000001576.14	7164.53	0.329279	0.0922894	3.56789	0.000359864	0.0191645	Ergic1
ENSMUSG00000001583	ENSMUSG00000001583.13	753.418	0.0392258	0.0777513	0.504504	0.613907	0.905746	Tnk1
ENSMUSG00000001622	ENSMUSG00000001622.15	128.9	-0.332303	0.139928	-2.37481	0.0175578	0.206966	Csn3
ENSMUSG00000001627	ENSMUSG00000001627.11	2129.58	-0.0392321	0.0843098	-0.465333	0.641693	0.914411	Ifrd1
ENSMUSG00000001630	ENSMUSG00000001630.13	1139.17	0.0868563	0.104705	0.829536	0.406801	0.801957	Stk38l
ENSMUSG00000001632	ENSMUSG00000001632.16	1251.25	-0.137616	0.0790766	-1.74028	0.081809	0.451876	Brpf1
ENSMUSG00000001642	ENSMUSG00000001642.18	2600.74	-0.0687744	0.0982016	-0.700339	0.483716	0.847978	Akr1b3
ENSMUSG00000001663	ENSMUSG00000001663.10	340.656	-0.0533393	0.140859	-0.378672	0.704932	0.93471	Gstt1
ENSMUSG00000001666	ENSMUSG00000001666.8	1441.77	0.221162	0.0868159	2.54748	0.0108503	0.161511	Ddt
ENSMUSG00000001670	ENSMUSG00000001670.13	192.883	-0.0562976	0.140824	-0.399773	0.689323	0.931451	Tat
ENSMUSG00000001672	ENSMUSG00000001672.14	506.195	0.251585	0.0832621	3.0216	0.00251444	0.067491	Marveld3
ENSMUSG00000001674	ENSMUSG00000001674.11	1574.48	-0.000486448	0.0736217	-0.0066074	0.994728	0.998655	Ddx18
ENSMUSG00000001687	ENSMUSG00000001687.15	8451.24	-0.0600694	0.0890334	-0.674684	0.499877	0.855025	Ubl3
ENSMUSG00000001700	ENSMUSG00000001700.9	3687.2	0.392852	0.118384	3.31845	0.000905193	0.0350128	Gramd3
ENSMUSG00000001707	ENSMUSG00000001707.7	551.497	0.0452507	0.102747	0.440408	0.659642	0.922745	Eef1e1
ENSMUSG00000001729	ENSMUSG00000001729.14	6238.05	0.153533	0.0660771	2.32355	0.0201497	0.224638	Akt1
ENSMUSG00000001750	ENSMUSG00000001750.15	331.265	0.0434658	0.111975	0.388174	0.697887	0.933691	Tcirg1
ENSMUSG00000001751	ENSMUSG00000001751.9	3056.03	-0.151323	0.0775451	-1.95142	0.0510074	0.364804	Naglu
ENSMUSG00000001755	ENSMUSG00000001755.12	1479.76	0.048184	0.0657466	0.732874	0.463635	0.835432	Coasy
ENSMUSG00000001763	ENSMUSG00000001763.14	105.548	-0.0296066	0.122037	-0.242603	0.808313	0.958353	Tspan33
ENSMUSG00000001767	ENSMUSG00000001767.5	974.942	0.050761	0.0708385	0.716573	0.473637	0.8419	Crnkl1
ENSMUSG00000001768	ENSMUSG00000001768.15	52.9254	-0.101971	0.137662	-0.740735	0.458854	0.832245	Rin2
ENSMUSG00000001774	ENSMUSG00000001774.8	2078.88	0.0820678	0.121528	0.6753	0.499485	0.854881	Chordc1
ENSMUSG00000001783	ENSMUSG00000001783.3	4869.82	0.0324986	0.0826267	0.393318	0.694084	0.9325	Rtcb
ENSMUSG00000001785	ENSMUSG00000001785.12	1202.4	-0.0246849	0.061395	-0.402066	0.687635	0.931173	Pwp1
ENSMUSG00000001786	ENSMUSG00000001786.14	1130.37	0.0331534	0.0708248	0.468105	0.63971	0.913959	Fbxo7
ENSMUSG00000001794	ENSMUSG00000001794.13	7831.11	0.173267	0.0997479	1.73705	0.0823778	0.453706	Capns1
ENSMUSG00000001802	ENSMUSG00000001802.16	56.4242	-0.195128	0.137894	-1.41506	0.157051	0.595737	Lrp3
ENSMUSG00000001827	ENSMUSG00000001827.12	145.855	0.0457847	0.143642	0.318742	0.749922	0.942391	Folr1
ENSMUSG00000001829	ENSMUSG00000001829.17	1501.59	0.110511	0.0989232	1.11714	0.263935	0.706972	Clpb
ENSMUSG00000001833	ENSMUSG00000001833.17	4431.38	0.101972	0.0775417	1.31506	0.188489	0.635816	2007-09-01
ENSMUSG00000001844	ENSMUSG00000001844.10	936.316	-0.0173449	0.119517	-0.145126	0.884612	0.977581	Zdhhc4
ENSMUSG00000001847	ENSMUSG00000001847.14	7474.2	0.0373692	0.0473647	0.788966	0.430132	0.815773	Rac1
ENSMUSG00000001855	ENSMUSG00000001855.15	1957.59	0.00619636	0.120842	0.0512765	0.959105	0.993224	Nup214
ENSMUSG00000001864	ENSMUSG00000001864.13	40.6789	0.216658	0.145913	1.48484	0.137586	0.564665	Aif1l
ENSMUSG00000001891	ENSMUSG00000001891.16	1657.27	0.0706529	0.0842868	0.838244	0.401894	0.79975	Ugp2
ENSMUSG00000001901	ENSMUSG00000001901.15	2144.91	-0.146833	0.137592	-1.06716	0.285899	0.726542	Kcnh6
ENSMUSG00000001909	ENSMUSG00000001909.15	2068.96	0.0913313	0.118948	0.767825	0.442591	0.822413	Trmt1
ENSMUSG00000001910	ENSMUSG00000001910.4	6394.44	0.0873811	0.0883814	0.988682	0.322819	0.75241	Nacc1
ENSMUSG00000001911	ENSMUSG00000001911.16	1049.39	-0.223085	0.123352	-1.80852	0.0705252	0.424836	Nfix
ENSMUSG00000001918	ENSMUSG00000001918.17	606.336	-0.155483	0.143943	-1.08017	0.280065	0.72136	Slc1a5
ENSMUSG00000001924	ENSMUSG00000001924.15	14789.3	0.203739	0.0650215	3.13341	0.00172785	0.0517619	Uba1
ENSMUSG00000001942	ENSMUSG00000001942.8	1457.3	0.0324447	0.101923	0.318324	0.750239	0.942407	Siae
ENSMUSG00000001946	ENSMUSG00000001946.14	472.717	0.0271223	0.0848593	0.319615	0.74926	0.942352	Esam
ENSMUSG00000001948	ENSMUSG00000001948.10	181.418	-0.115785	0.144975	-0.798654	0.424491	0.813996	Spa17
ENSMUSG00000001962	ENSMUSG00000001962.8	2587.42	0.0493672	0.0972169	0.507805	0.61159	0.904589	Fam50a
ENSMUSG00000001964	ENSMUSG00000001964.14	3498.71	0.188395	0.0714003	2.63858	0.00832539	0.138933	Emd
ENSMUSG00000001983	ENSMUSG00000001983.7	241.793	-0.160325	0.101773	-1.57532	0.115182	0.522716	Taco1
ENSMUSG00000001985	ENSMUSG00000001985.9	263.072	0.0706798	0.137828	0.512812	0.608083	0.903741	Grik3
ENSMUSG00000001986	ENSMUSG00000001986.16	950.412	0.0901525	0.134705	0.669258	0.503331	0.856225	Gria3
ENSMUSG00000001995	ENSMUSG00000001995.9	928.875	0.00937069	0.0873074	0.10733	0.914527	0.9841	Sipa1l2
ENSMUSG00000001998	ENSMUSG00000001998.15	353.854	-0.173545	0.140588	-1.23442	0.217046	0.667877	Ap4e1
ENSMUSG00000001999	ENSMUSG00000001999.15	867.437	0.213144	0.142192	1.49898	0.133878	0.557493	Blvra
ENSMUSG00000002006	ENSMUSG00000002006.12	1294.01	-0.00880233	0.11082	-0.0794291	0.936691	0.986886	Pdzd4
ENSMUSG00000002010	ENSMUSG00000002010.17	3772.69	0.0935174	0.0728768	1.28323	0.199413	0.646666	Idh3g
ENSMUSG00000002014	ENSMUSG00000002014.12	11906.6	0.117881	0.099898	1.18001	0.237996	0.68698	Ssr4
ENSMUSG00000002015	ENSMUSG00000002015.5	4741.07	0.0981826	0.0837064	1.17294	0.24082	0.689155	Bcap31
ENSMUSG00000002017	ENSMUSG00000002017.9	2357.35	0.162957	0.0897606	1.81547	0.0694521	0.422124	Fam98a
ENSMUSG00000002020	ENSMUSG00000002020.15	52.3886	-0.291615	0.145574	-2.00321	0.0451544	0.342308	Ltbp2
ENSMUSG00000002028	ENSMUSG00000002028.13	2071.04	0.0216289	0.121206	0.178447	0.858372	0.972278	Kmt2a
ENSMUSG00000002031	ENSMUSG00000002031.12	1590.22	0.0443442	0.0900814	0.492268	0.62253	0.907988	Ift46
ENSMUSG00000002032	ENSMUSG00000002032.17	709.781	-0.134344	0.141268	-0.950989	0.34161	0.764106	Tmem25
ENSMUSG00000002043	ENSMUSG00000002043.17	778.847	-0.182143	0.106421	-1.71154	0.086982	0.464219	Trappc6a
ENSMUSG00000002052	ENSMUSG00000002052.6	4841.29	0.0524146	0.0536026	0.977838	0.328155	0.754981	Supt6
ENSMUSG00000002055	ENSMUSG00000002055.9	3251.71	0.0710434	0.091341	0.777782	0.436698	0.819028	Spag5
ENSMUSG00000002057	ENSMUSG00000002057.4	82.1618	-0.313689	0.142045	-2.20838	0.0272175	0.263587	Foxn1
ENSMUSG00000002058	ENSMUSG00000002058.13	463.227	0.168596	0.130381	1.2931	0.195976	0.642065	Unc119
ENSMUSG00000002059	ENSMUSG00000002059.18	957.062	0.0582079	0.0855049	0.680755	0.496027	0.853814	Rab34
ENSMUSG00000002064	ENSMUSG00000002064.10	2600.59	0.153237	0.0957314	1.60069	0.109445	0.512855	Sdf2
ENSMUSG00000002068	ENSMUSG00000002068.16	1972.44	-0.0359806	0.0684597	-0.525574	0.599185	0.898911	Ccne1
ENSMUSG00000002083	ENSMUSG00000002083.13	393.962	-0.117672	0.139162	-0.845571	0.397792	0.798441	Bbc3
ENSMUSG00000002102	ENSMUSG00000002102.15	5081.96	0.187004	0.0783323	2.38731	0.0169722	0.203528	Psmc3
ENSMUSG00000002103	ENSMUSG00000002103.15	1820.37	-0.0502782	0.0881622	-0.570292	0.568479	0.888146	Acp2
ENSMUSG00000002105	ENSMUSG00000002105.15	1074.3	0.0908527	0.0953975	0.95236	0.340915	0.763821	Slc39a13
ENSMUSG00000002107	ENSMUSG00000002107.18	1735.3	0.0544271	0.0911719	0.596972	0.550526	0.879407	Celf2
ENSMUSG00000002109	ENSMUSG00000002109.14	489.363	-0.118939	0.0999909	-1.1895	0.234244	0.68322	Ddb2
ENSMUSG00000002129	ENSMUSG00000002129.11	2873.55	0.0338724	0.0775334	0.436876	0.662202	0.924358	Sf3a1
ENSMUSG00000002147	ENSMUSG00000002147.18	867.34	-0.134375	0.0898803	-1.49505	0.134902	0.560073	Stat6
ENSMUSG00000002190	ENSMUSG00000002190.13	3501.25	0.0249372	0.119568	0.20856	0.834791	0.964682	Clgn
ENSMUSG00000002204	ENSMUSG00000002204.9	53.3805	0.169051	0.13755	1.22902	0.219065	0.669212	Napsa
ENSMUSG00000002205	ENSMUSG00000002205.16	1477.23	0.0103252	0.0927221	0.111357	0.911333	0.983831	Vrk3
ENSMUSG00000002210	ENSMUSG00000002210.11	967.617	-0.0323229	0.08582	-0.376635	0.706445	0.934791	Smg9
ENSMUSG00000002221	ENSMUSG00000002221.11	4473.08	-0.0940874	0.116933	-0.804629	0.421034	0.812025	Paxip1
ENSMUSG00000002222	ENSMUSG00000002222.14	2886.89	-0.17217	0.116068	-1.48335	0.13798	0.565588	Rmnd5a
ENSMUSG00000002227	ENSMUSG00000002227.15	156.546	-0.0200438	0.135325	-0.148116	0.882251	0.97694	Mov10
ENSMUSG00000002228	ENSMUSG00000002228.7	41.9745	-0.0182285	0.138169	-0.131929	0.895041	0.97993	Ppm1j
ENSMUSG00000002233	ENSMUSG00000002233.13	78.3346	-0.098703	0.1444	-0.68354	0.494266	0.852929	Rhoc
ENSMUSG00000002250	ENSMUSG00000002250.15	1003.6	-0.07623	0.116377	-0.655024	0.512452	0.861822	Ppard
ENSMUSG00000002257	ENSMUSG00000002257.7	49.3704	0.0359082	0.138281	0.259677	0.795113	0.955451	Def6
ENSMUSG00000002265	ENSMUSG00000002265.16	42751.9	0.0741032	0.130411	0.568227	0.569881	0.888936	Peg3
ENSMUSG00000002266	ENSMUSG00000002266.17	5232.28	0.21502	0.146011	1.47263	0.140851	0.571183	Zim1
ENSMUSG00000002274	ENSMUSG00000002274.12	37.464	-0.184399	0.146006	-1.26296	0.206604	0.65396	Metrn
ENSMUSG00000002279	ENSMUSG00000002279.18	905.206	0.0524869	0.091973	0.570678	0.568218	0.888146	Lmf1
ENSMUSG00000002280	ENSMUSG00000002280.10	801.043	-0.161831	0.083716	-1.93309	0.0532251	0.37491	Narfl
ENSMUSG00000002297	ENSMUSG00000002297.15	1976.7	0.135691	0.11762	1.15364	0.248647	0.696015	Dbf4
ENSMUSG00000002307	ENSMUSG00000002307.15	1040.15	0.165442	0.0954654	1.733	0.083095	0.455218	Daxx
ENSMUSG00000002308	ENSMUSG00000002308.15	965.435	0.0947793	0.088777	1.06761	0.285696	0.726542	Cd320
ENSMUSG00000002319	ENSMUSG00000002319.15	3291.19	0.181508	0.111434	1.62885	0.103346	0.499892	Ipo4
ENSMUSG00000002320	ENSMUSG00000002320.15	4778.15	0.0140766	0.0671747	0.209552	0.834017	0.964464	Tm9sf1
ENSMUSG00000002324	ENSMUSG00000002324.7	1849.69	-0.111033	0.0928824	-1.19541	0.231927	0.681654	Rec8
ENSMUSG00000002325	ENSMUSG00000002325.14	611.114	0.0181714	0.106668	0.170355	0.864731	0.973828	Irf9
ENSMUSG00000002326	ENSMUSG00000002326.5	1074.82	0.105767	0.0680079	1.55521	0.119896	0.531869	Gmpr2
ENSMUSG00000002329	ENSMUSG00000002329.6	1274.76	0.098873	0.0979897	1.00901	0.312968	0.746673	Mdp1
ENSMUSG00000002332	ENSMUSG00000002332.15	1774.66	0.157842	0.101652	1.55277	0.120479	0.533406	Dhrs1
ENSMUSG00000002341	ENSMUSG00000002341.8	356.996	-0.228795	0.103027	-2.22073	0.0263691	0.259173	Ncan
ENSMUSG00000002342	ENSMUSG00000002342.17	1720.3	0.0849926	0.0971718	0.874663	0.381757	0.790739	Tmem161a
ENSMUSG00000002343	ENSMUSG00000002343.11	858.18	0.249925	0.0686254	3.64186	0.00027067	0.0157306	Armc6
ENSMUSG00000002345	ENSMUSG00000002345.17	786.458	0.0772028	0.096236	0.802223	0.422424	0.812942	Borcs8
ENSMUSG00000002346	ENSMUSG00000002346.16	760.246	0.142265	0.0825388	1.72362	0.0847771	0.459517	Slc25a42
ENSMUSG00000002365	ENSMUSG00000002365.9	969.164	0.258577	0.100004	2.58566	0.0097194	0.150843	Snx9
ENSMUSG00000002372	ENSMUSG00000002372.8	4385.9	0.177071	0.056353	3.14218	0.00167694	0.0510607	Ranbp3
ENSMUSG00000002379	ENSMUSG00000002379.6	3685.67	0.156412	0.106801	1.46452	0.143052	0.572229	Ndufa11
ENSMUSG00000002393	ENSMUSG00000002393.14	1056.92	-0.118523	0.113391	-1.04526	0.295901	0.735324	Nr2f6
ENSMUSG00000002395	ENSMUSG00000002395.14	1909.96	0.125554	0.109995	1.14145	0.253684	0.699605	Use1
ENSMUSG00000002396	ENSMUSG00000002396.8	684.232	-0.107366	0.106207	-1.01091	0.312058	0.745671	Ocel1
ENSMUSG00000002409	ENSMUSG00000002409.18	607.201	-0.201709	0.0977243	-2.06406	0.0390124	0.32091	Dyrk1b
ENSMUSG00000002413	ENSMUSG00000002413.15	2681.11	-0.119338	0.0903219	-1.32125	0.186417	0.632742	Braf
ENSMUSG00000002416	ENSMUSG00000002416.13	2376.04	0.140255	0.114369	1.22634	0.220072	0.670855	Ndufb2
ENSMUSG00000002428	ENSMUSG00000002428.12	1372.94	-0.00687903	0.102182	-0.0673211	0.946326	0.989869	Hltf
ENSMUSG00000002455	ENSMUSG00000002455.14	2882.12	0.104614	0.0584769	1.78897	0.0736194	0.43161	Prpf6
ENSMUSG00000002458	ENSMUSG00000002458.13	340.3	0.0828579	0.107777	0.76879	0.442018	0.822001	Rgs19
ENSMUSG00000002459	ENSMUSG00000002459.17	88.6826	-0.324819	0.132977	-2.44267	0.0145791	0.189386	Rgs20
ENSMUSG00000002475	ENSMUSG00000002475.15	298.232	0.0417566	0.113668	0.367356	0.713353	0.935647	Abhd3
ENSMUSG00000002477	ENSMUSG00000002477.4	2599.85	0.126567	0.0962472	1.31502	0.188504	0.635816	Snrpd1
ENSMUSG00000002486	ENSMUSG00000002486.15	571.493	0.00662714	0.0861148	0.076957	0.938658	0.9878	Tchp
ENSMUSG00000002489	ENSMUSG00000002489.15	1247.11	0.00712967	0.0892736	0.0798632	0.936346	0.986886	Tiam1
ENSMUSG00000002496	ENSMUSG00000002496.9	3573.65	0.137352	0.0754712	1.81992	0.0687706	0.42107	Tsc2
ENSMUSG00000002504	ENSMUSG00000002504.14	158.95	-0.042801	0.115358	-0.371028	0.710617	0.935383	Slc9a3r2
ENSMUSG00000002524	ENSMUSG00000002524.15	5391.95	0.0253455	0.0689598	0.367539	0.713217	0.935647	Puf60
ENSMUSG00000002546	ENSMUSG00000002546.16	2990.69	-0.0769163	0.0835556	-0.92054	0.357291	0.775786	Golga2
ENSMUSG00000002550	ENSMUSG00000002550.16	2309.01	-0.0289992	0.0720085	-0.40272	0.687155	0.931173	Uck1
ENSMUSG00000002578	ENSMUSG00000002578.15	216.908	-0.23775	0.140702	-1.68974	0.0910774	0.474447	Ikzf4
ENSMUSG00000002580	ENSMUSG00000002580.7	2558.48	0.0879939	0.111754	0.787391	0.431053	0.816305	Mien1
ENSMUSG00000002603	ENSMUSG00000002603.15	1146.61	-0.242198	0.092492	-2.61858	0.00882967	0.142912	Tgfb1
ENSMUSG00000002608	ENSMUSG00000002608.8	2238.2	0.0306308	0.0921665	0.332342	0.739631	0.940232	Ccdc97
ENSMUSG00000002617	ENSMUSG00000002617.14	273.675	0.138606	0.100118	1.38442	0.16623	0.605329	Zfp40
ENSMUSG00000002625	ENSMUSG00000002625.9	1261.36	0.183051	0.0687951	2.66081	0.00779537	0.133762	Akap8l
ENSMUSG00000002635	ENSMUSG00000002635.11	624.997	-0.000553153	0.097814	-0.00565515	0.995488	0.998655	Pdcd2l
ENSMUSG00000002658	ENSMUSG00000002658.9	2407.89	0.0633163	0.0790005	0.801467	0.422861	0.812942	Gtf2f1
ENSMUSG00000002660	ENSMUSG00000002660.7	1518.2	0.0305964	0.0937746	0.326276	0.744215	0.940717	Clpp
ENSMUSG00000002661	ENSMUSG00000002661.14	699.767	0.201954	0.117437	1.71969	0.0854892	0.461152	Alkbh7
ENSMUSG00000002668	ENSMUSG00000002668.7	119.252	-0.166643	0.141688	-1.17612	0.239545	0.688236	Dennd1c
ENSMUSG00000002679	ENSMUSG00000002679.14	851.299	0.0630057	0.0930401	0.677189	0.498286	0.854018	Med6
ENSMUSG00000002688	ENSMUSG00000002688.7	1005.48	0.0391488	0.108822	0.359752	0.719033	0.936235	Prkd1
ENSMUSG00000002699	ENSMUSG00000002699.13	384.247	-0.0127496	0.129824	-0.0982064	0.921768	0.985705	Lcp2
ENSMUSG00000002718	ENSMUSG00000002718.14	5429.99	0.20846	0.0687025	3.03424	0.00241146	0.0655162	Cse1l
ENSMUSG00000002728	ENSMUSG00000002728.14	4026.1	0.0904838	0.0683326	1.32417	0.185447	0.631891	Naa20
ENSMUSG00000002731	ENSMUSG00000002731.6	549.239	-0.0478485	0.124319	-0.384884	0.700323	0.933974	Prkra
ENSMUSG00000002732	ENSMUSG00000002732.14	42.787	-0.0654624	0.145403	-0.450213	0.652557	0.919812	Fkbp7
ENSMUSG00000002733	ENSMUSG00000002733.8	1385.55	-0.018117	0.0737242	-0.24574	0.805883	0.958353	Plekha3
ENSMUSG00000002741	ENSMUSG00000002741.9	4954.53	0.140297	0.0750308	1.86985	0.0615042	0.39909	Ykt6
ENSMUSG00000002748	ENSMUSG00000002748.7	6879.39	0.00325506	0.0944205	0.0344741	0.972499	0.995679	Baz1b
ENSMUSG00000002763	ENSMUSG00000002763.16	1726.54	0.0531778	0.0994516	0.53471	0.59285	0.895885	Pex6
ENSMUSG00000002767	ENSMUSG00000002767.13	1181.73	0.0877358	0.0908024	0.966228	0.33393	0.759008	Mrpl2
ENSMUSG00000002768	ENSMUSG00000002768.7	2214.34	0.158585	0.114707	1.38252	0.166811	0.605806	Mea1
ENSMUSG00000002769	ENSMUSG00000002769.8	63.4176	0.12522	0.133344	0.939082	0.347689	0.769336	Gnmt
ENSMUSG00000002771	ENSMUSG00000002771.12	201.882	-0.191647	0.130636	-1.46704	0.142366	0.571875	Grin2d
ENSMUSG00000002778	ENSMUSG00000002778.14	6702.29	-0.0614479	0.0666164	-0.922414	0.356313	0.774872	Kdelr1
ENSMUSG00000002781	ENSMUSG00000002781.19	535.415	-0.194465	0.0941012	-2.06655	0.0387762	0.320545	Tmem143
ENSMUSG00000002797	ENSMUSG00000002797.9	224.473	0.134945	0.111785	1.20718	0.227363	0.676705	Ggct
ENSMUSG00000002799	ENSMUSG00000002799.5	2222.32	-0.0762957	0.110171	-0.692524	0.488608	0.85042	Jag2
ENSMUSG00000002803	ENSMUSG00000002803.13	1201.24	0.0172645	0.110521	0.15621	0.875867	0.97593	Btbd6
ENSMUSG00000002804	ENSMUSG00000002804.3	973.452	0.0244939	0.1389	0.176342	0.860025	0.972503	Nudt14
ENSMUSG00000002808	ENSMUSG00000002808.6	831.617	0.086788	0.123148	0.704744	0.48097	0.846451	Epdr1
ENSMUSG00000002812	ENSMUSG00000002812.4	2334.52	0.078115	0.11404	0.684977	0.493359	0.852803	Flii
ENSMUSG00000002814	ENSMUSG00000002814.15	528.649	0.0225382	0.102798	0.219248	0.826457	0.962521	Top3a
ENSMUSG00000002820	ENSMUSG00000002820.6	1710.94	-0.246003	0.13241	-1.85789	0.0631845	0.404949	Atg4d
ENSMUSG00000002825	ENSMUSG00000002825.7	470.963	0.0073448	0.121669	0.0603672	0.951863	0.99209	Qtrt1
ENSMUSG00000002833	ENSMUSG00000002833.10	2486.68	0.0935043	0.0638985	1.46333	0.143378	0.572261	Hdgfl2
ENSMUSG00000002835	ENSMUSG00000002835.8	2967.32	0.210865	0.0767023	2.74914	0.00597528	0.114758	Chaf1a
ENSMUSG00000002844	ENSMUSG00000002844.8	1654.89	0.243788	0.0954585	2.55386	0.0106535	0.159172	Adprh
ENSMUSG00000002845	ENSMUSG00000002845.14	1427.54	-0.0900474	0.109738	-0.820564	0.411895	0.805177	Tmem39a
ENSMUSG00000002846	ENSMUSG00000002846.9	716.327	-0.033777	0.0898386	-0.375975	0.706936	0.934791	Timmdc1
ENSMUSG00000002870	ENSMUSG00000002870.8	10034.1	0.0980234	0.0629561	1.55701	0.119468	0.531069	Mcm2
ENSMUSG00000002871	ENSMUSG00000002871.14	968.225	-0.111141	0.0802607	-1.38475	0.16613	0.605329	Tpra1
ENSMUSG00000002881	ENSMUSG00000002881.14	1955.61	0.0138735	0.143908	0.0964052	0.923199	0.985705	Nab1
ENSMUSG00000002885	ENSMUSG00000002885.14	57.2762	0.0340113	0.145919	0.233083	0.815697	0.959579	Adgre5
ENSMUSG00000002897	ENSMUSG00000002897.5	795.722	-0.0105246	0.0913597	-0.1152	0.908287	0.98248	Il17ra
ENSMUSG00000002900	ENSMUSG00000002900.15	107.982	-0.0780478	0.145704	-0.535659	0.592195	0.895697	Lamb1
ENSMUSG00000002908	ENSMUSG00000002908.17	65.0216	-0.265401	0.145987	-1.81798	0.0690674	0.421143	Kcnn1
ENSMUSG00000002910	ENSMUSG00000002910.11	104.638	-0.0271297	0.145517	-0.186437	0.852102	0.9698	Arrdc2
ENSMUSG00000002948	ENSMUSG00000002948.19	1976	-0.207992	0.0724926	-2.86915	0.00411581	0.0927348	Map2k7
ENSMUSG00000002949	ENSMUSG00000002949.15	1295.48	0.108014	0.077326	1.39686	0.162455	0.601189	Timm44
ENSMUSG00000002957	ENSMUSG00000002957.11	4964.65	-0.00638002	0.0589012	-0.108317	0.913744	0.983954	Ap2a2
ENSMUSG00000002963	ENSMUSG00000002963.17	935.857	0.0298647	0.11406	0.261834	0.79345	0.955329	Pnkp
ENSMUSG00000002968	ENSMUSG00000002968.8	3990.99	0.0916454	0.0834505	1.0982	0.272117	0.715458	Med25
ENSMUSG00000002980	ENSMUSG00000002980.14	1326.3	-0.25695	0.0904378	-2.84118	0.00449474	0.0980667	Bcam
ENSMUSG00000002981	ENSMUSG00000002981.10	7886.44	0.0450231	0.0629736	0.714953	0.474638	0.842114	Clptm1
ENSMUSG00000002983	ENSMUSG00000002983.17	425.415	-0.261077	0.129935	-2.00928	0.0445075	0.340156	Relb
ENSMUSG00000002984	ENSMUSG00000002984.17	2179.45	0.0982976	0.0956391	1.0278	0.304046	0.739759	Tomm40
ENSMUSG00000002985	ENSMUSG00000002985.16	90.8767	-0.0520807	0.14036	-0.371051	0.7106	0.935383	Apoe
ENSMUSG00000002996	ENSMUSG00000002996.17	1226.48	-0.15557	0.132194	-1.17683	0.239265	0.688232	Hbp1
ENSMUSG00000002997	ENSMUSG00000002997.15	2226.38	0.125146	0.106507	1.17501	0.23999	0.688236	Prkar2b
ENSMUSG00000003031	ENSMUSG00000003031.14	5530	0.0692615	0.0693059	0.99936	0.31762	0.750019	Cdkn1b
ENSMUSG00000003032	ENSMUSG00000003032.8	510.697	-0.145209	0.135788	-1.06938	0.284898	0.725657	Klf4
ENSMUSG00000003033	ENSMUSG00000003033.15	3578.31	-0.00142888	0.0762665	-0.0187354	0.985052	0.997439	Ap1m1
ENSMUSG00000003037	ENSMUSG00000003037.16	4038.37	-0.0641534	0.114921	-0.558241	0.57668	0.890536	Rab8a
ENSMUSG00000003038	ENSMUSG00000003038.15	20971.6	-0.0324515	0.128948	-0.251664	0.801301	0.956594	Hmgn2
ENSMUSG00000003039	ENSMUSG00000003039.9	3062.44	0.00297444	0.0952899	0.0312147	0.975098	0.996035	Fam32a
ENSMUSG00000003051	ENSMUSG00000003051.13	1190.08	-0.0513363	0.134726	-0.381043	0.703171	0.934077	Elf3
ENSMUSG00000003062	ENSMUSG00000003062.12	1180.59	0.0723554	0.0872148	0.829623	0.406752	0.801957	Stard3nl
ENSMUSG00000003068	ENSMUSG00000003068.16	2939.38	0.0161407	0.0685286	0.235532	0.813796	0.959362	Stk11
ENSMUSG00000003070	ENSMUSG00000003070.6	102.411	-0.258895	0.143366	-1.80583	0.0709441	0.425044	Efna2
ENSMUSG00000003072	ENSMUSG00000003072.15	7280.39	0.137413	0.110999	1.23797	0.215726	0.666896	Atp5d
ENSMUSG00000003099	ENSMUSG00000003099.11	3324.48	0.0210867	0.080132	0.263149	0.792436	0.954966	Ppp5c
ENSMUSG00000003119	ENSMUSG00000003119.14	907.82	-0.151121	0.103801	-1.45588	0.145427	0.575464	Cdk12
ENSMUSG00000003123	ENSMUSG00000003123.15	322.764	-0.0206663	0.114736	-0.18012	0.857058	0.971778	Lipe
ENSMUSG00000003131	ENSMUSG00000003131.7	6329.58	0.183322	0.095091	1.92786	0.0538729	0.37568	Pafah1b2
ENSMUSG00000003134	ENSMUSG00000003134.10	801.265	-0.0760252	0.108985	-0.697572	0.485445	0.848425	Tbc1d8
ENSMUSG00000003135	ENSMUSG00000003135.15	1273.81	0.0434643	0.0673193	0.645645	0.51851	0.864227	Cnot11
ENSMUSG00000003153	ENSMUSG00000003153.10	71.7687	-0.108323	0.145249	-0.745776	0.455803	0.829671	Slc2a3
ENSMUSG00000003154	ENSMUSG00000003154.15	787.693	-0.139829	0.0964966	-1.44906	0.147321	0.578667	Foxj2
ENSMUSG00000003161	ENSMUSG00000003161.15	1750.1	0.0988604	0.127466	0.775584	0.437995	0.819294	Sri
ENSMUSG00000003166	ENSMUSG00000003166.19	3884.33	-0.0176306	0.0518708	-0.339895	0.733936	0.938791	Dgcr2
ENSMUSG00000003184	ENSMUSG00000003184.15	1333.12	-0.118733	0.0768635	-1.54473	0.122412	0.5355	Irf3
ENSMUSG00000003190	ENSMUSG00000003190.12	39.0408	0.115724	0.144915	0.798564	0.424543	0.813996	Bcl2l12
ENSMUSG00000003198	ENSMUSG00000003198.9	305.557	0.0596892	0.0890015	0.670654	0.502441	0.856225	Zfp959
ENSMUSG00000003199	ENSMUSG00000003199.16	2233.47	0.0161617	0.0823406	0.196279	0.844392	0.967714	Mpnd
ENSMUSG00000003200	ENSMUSG00000003200.9	4463.3	0.19896	0.0465758	4.27175	1.94e-05	0.00237842	Sh3gl1
ENSMUSG00000003206	ENSMUSG00000003206.6	61.6806	0.16663	0.134775	1.23635	0.216327	0.667111	Ebi3
ENSMUSG00000003208	ENSMUSG00000003208.8	378.525	0.0468868	0.0862946	0.543333	0.5869	0.894311	Ccdc94
ENSMUSG00000003226	ENSMUSG00000003226.6	4767.17	0.0458517	0.113564	0.403753	0.686394	0.931173	Ranbp2
ENSMUSG00000003228	ENSMUSG00000003228.8	1008.04	-0.0832984	0.143025	-0.582404	0.560294	0.883939	Grk5
ENSMUSG00000003233	ENSMUSG00000003233.11	804.483	-0.0586528	0.12522	-0.468399	0.639499	0.913951	Dvl3
ENSMUSG00000003234	ENSMUSG00000003234.15	1994.06	0.103089	0.0898839	1.14691	0.251418	0.697958	Abcf3
ENSMUSG00000003235	ENSMUSG00000003235.12	3107.21	0.119271	0.0999567	1.19322	0.232782	0.682384	Eif2b5
ENSMUSG00000003269	ENSMUSG00000003269.16	4202.68	-0.043636	0.0805677	-0.541607	0.588089	0.894311	Cyth2
ENSMUSG00000003271	ENSMUSG00000003271.17	276.553	-0.00675515	0.114185	-0.0591597	0.952825	0.992357	Sult2b1
ENSMUSG00000003279	ENSMUSG00000003279.16	540.541	-0.0752525	0.144105	-0.522205	0.601528	0.899471	Dlgap1
ENSMUSG00000003299	ENSMUSG00000003299.10	2099.42	0.0172792	0.0864683	0.199833	0.841611	0.966812	Mrpl4
ENSMUSG00000003308	ENSMUSG00000003308.15	2533.06	0.0104652	0.0623555	0.167832	0.866716	0.974473	Keap1
ENSMUSG00000003309	ENSMUSG00000003309.14	1741.53	0.0915787	0.0888843	1.03031	0.302862	0.739759	Ap1m2
ENSMUSG00000003316	ENSMUSG00000003316.14	5634.08	-0.0236938	0.114844	-0.206313	0.836546	0.965152	Glg1
ENSMUSG00000003341	ENSMUSG00000003341.8	47.571	0.0967614	0.144096	0.671508	0.501897	0.856225	Atp8b3
ENSMUSG00000003344	ENSMUSG00000003344.14	2155.5	0.0740107	0.114498	0.646393	0.518025	0.863995	Btbd2
ENSMUSG00000003345	ENSMUSG00000003345.15	3282.45	-0.0202881	0.0558504	-0.363259	0.716412	0.93588	Csnk1g2
ENSMUSG00000003346	ENSMUSG00000003346.14	2191.28	0.0603923	0.113278	0.533135	0.59394	0.8963	Abhd17a
ENSMUSG00000003348	ENSMUSG00000003348.9	852.233	0.392681	0.116782	3.36252	0.000772353	0.031285	Mob3a
ENSMUSG00000003352	ENSMUSG00000003352.13	1173.06	-0.209542	0.076092	-2.75379	0.00589092	0.114003	Cacnb3
ENSMUSG00000003354	ENSMUSG00000003354.5	65.8877	-0.0644136	0.129602	-0.497012	0.619181	0.907335	Ccdc65
ENSMUSG00000003355	ENSMUSG00000003355.6	1149.08	0.0195465	0.143635	0.136085	0.891754	0.979424	Fkbp11
ENSMUSG00000003360	ENSMUSG00000003360.14	2471.02	0.0123926	0.0556685	0.222614	0.823836	0.961847	Ddx23
ENSMUSG00000003363	ENSMUSG00000003363.15	6643.4	0.101826	0.0976514	1.04275	0.297063	0.735611	Pld3
ENSMUSG00000003378	ENSMUSG00000003378.9	1939.55	-0.021958	0.123996	-0.177086	0.859441	0.972503	Grik5
ENSMUSG00000003380	ENSMUSG00000003380.11	3994.47	0.0169162	0.117528	0.143934	0.885553	0.977714	Rabac1
ENSMUSG00000003382	ENSMUSG00000003382.18	510.603	-0.155317	0.0995115	-1.56079	0.118573	0.529026	Etv3
ENSMUSG00000003402	ENSMUSG00000003402.14	8665.71	0.0203359	0.0872115	0.233179	0.815622	0.959579	Prkcsh
ENSMUSG00000003410	ENSMUSG00000003410.8	4057.21	-0.014338	0.105146	-0.136363	0.891534	0.979424	Elavl3
ENSMUSG00000003411	ENSMUSG00000003411.10	293.405	0.0807701	0.14347	0.562974	0.573452	0.890076	Rab3b
ENSMUSG00000003421	ENSMUSG00000003421.13	805.344	-0.0440551	0.0959204	-0.459288	0.646027	0.916536	Nosip
ENSMUSG00000003423	ENSMUSG00000003423.15	2040.51	0.0349719	0.0947756	0.368996	0.71213	0.935647	Pih1d1
ENSMUSG00000003429	ENSMUSG00000003429.11	11364.9	0.170518	0.103705	1.64425	0.100124	0.493095	Rps11
ENSMUSG00000003435	ENSMUSG00000003435.9	6112.36	0.0845791	0.0702935	1.20323	0.228888	0.678843	Supt5
ENSMUSG00000003437	ENSMUSG00000003437.14	2401.65	0.0310174	0.0785349	0.39495	0.69288	0.932283	Paf1
ENSMUSG00000003438	ENSMUSG00000003438.17	2816.02	0.169965	0.0899185	1.89021	0.0587299	0.391735	Timm50
ENSMUSG00000003444	ENSMUSG00000003444.8	1050.42	0.120775	0.102308	1.1805	0.237801	0.686688	Med29
ENSMUSG00000003452	ENSMUSG00000003452.15	1484.49	0.118346	0.11163	1.06017	0.289069	0.728677	Bicd1
ENSMUSG00000003458	ENSMUSG00000003458.12	5177.91	-0.127689	0.0516544	-2.47199	0.0134363	0.181094	Ncstn
ENSMUSG00000003464	ENSMUSG00000003464.13	2389.42	0.0616231	0.101034	0.609922	0.541914	0.875015	Pex19
ENSMUSG00000003469	ENSMUSG00000003469.9	1226.21	0.22631	0.14547	1.55571	0.119776	0.531733	Phyhip
ENSMUSG00000003500	ENSMUSG00000003500.13	3453.75	-0.34989	0.0837314	-4.17872	2.93e-05	0.00323852	Impdh1
ENSMUSG00000003518	ENSMUSG00000003518.13	2420.84	-0.124328	0.139888	-0.888769	0.374127	0.787458	Dusp3
ENSMUSG00000003527	ENSMUSG00000003527.8	773.65	0.0316987	0.0823258	0.385039	0.700209	0.933914	Dgcr14
ENSMUSG00000003528	ENSMUSG00000003528.14	2314.18	0.159045	0.109422	1.45349	0.146087	0.576711	Slc25a1
ENSMUSG00000003531	ENSMUSG00000003531.14	644.993	0.144256	0.132261	1.0907	0.275407	0.716915	Dgcr6
ENSMUSG00000003534	ENSMUSG00000003534.17	5149.51	0.0355645	0.0497255	0.715216	0.474475	0.842114	Ddr1
ENSMUSG00000003541	ENSMUSG00000003541.6	335.586	-0.0510281	0.143955	-0.354473	0.722985	0.937763	Ier3
ENSMUSG00000003545	ENSMUSG00000003545.3	174.04	0.0512235	0.144832	0.353676	0.723582	0.937852	Fosb
ENSMUSG00000003546	ENSMUSG00000003546.9	480.725	-0.140205	0.0908099	-1.54393	0.122604	0.5355	Klc4
ENSMUSG00000003549	ENSMUSG00000003549.9	502.446	-0.0282903	0.132249	-0.213916	0.830612	0.963218	Ercc1
ENSMUSG00000003559	ENSMUSG00000003559.7	2115.96	0.121671	0.0933127	1.3039	0.192267	0.638994	As3mt
ENSMUSG00000003573	ENSMUSG00000003573.15	491.94	-0.209136	0.139752	-1.49648	0.134527	0.559324	Homer3
ENSMUSG00000003575	ENSMUSG00000003575.13	1796.79	0.0678734	0.10265	0.661212	0.508476	0.858926	Crtc1
ENSMUSG00000003581	ENSMUSG00000003581.14	553.942	-0.165375	0.0789175	-2.09554	0.036123	0.30677	Rnf215
ENSMUSG00000003604	ENSMUSG00000003604.14	510.823	0.19524	0.0882081	2.2134	0.0268701	0.262366	Aven
ENSMUSG00000003623	ENSMUSG00000003623.4	1525.3	-0.0251958	0.106227	-0.237189	0.812511	0.958721	Crot
ENSMUSG00000003644	ENSMUSG00000003644.17	499.698	-0.1378	0.111926	-1.23116	0.218262	0.668792	Rps6ka1
ENSMUSG00000003660	ENSMUSG00000003660.10	4918.89	0.0158694	0.0797662	0.198948	0.842303	0.967032	Snrnp200
ENSMUSG00000003662	ENSMUSG00000003662.10	1572.08	-0.0757563	0.112849	-0.671309	0.502024	0.856225	Ciao1
ENSMUSG00000003680	ENSMUSG00000003680.15	1965.39	0.0779738	0.101974	0.764641	0.444486	0.82337	Taf6l
ENSMUSG00000003721	ENSMUSG00000003721.14	2701.14	-0.0649731	0.108402	-0.599369	0.548927	0.878216	Insig2
ENSMUSG00000003731	ENSMUSG00000003731.13	2381.69	0.0272529	0.06019	0.452781	0.650707	0.918867	Kpna6
ENSMUSG00000003746	ENSMUSG00000003746.15	3336.97	-0.138961	0.145688	-0.953827	0.340171	0.763413	Man1a
ENSMUSG00000003752	ENSMUSG00000003752.9	238.771	0.0169993	0.105067	0.161795	0.871467	0.975692	Itpkc
ENSMUSG00000003762	ENSMUSG00000003762.13	683.954	0.0900945	0.11597	0.776878	0.437231	0.819028	Coq8b
ENSMUSG00000003778	ENSMUSG00000003778.14	3557.62	0.0164352	0.0565343	0.290712	0.771272	0.949297	Brd8
ENSMUSG00000003779	ENSMUSG00000003779.15	3600.12	0.0862826	0.0780733	1.10515	0.269095	0.711911	Kif20a
ENSMUSG00000003808	ENSMUSG00000003808.18	2726	0.0650818	0.112925	0.57633	0.564392	0.885785	Farsa
ENSMUSG00000003809	ENSMUSG00000003809.14	1441.72	0.0114678	0.0831438	0.137928	0.890297	0.978648	Gcdh
ENSMUSG00000003810	ENSMUSG00000003810.12	3466.65	-0.0388863	0.0834562	-0.465949	0.641252	0.914411	Mast2
ENSMUSG00000003812	ENSMUSG00000003812.13	781.924	0.0760603	0.145633	0.522274	0.60148	0.899471	Dnase2a
ENSMUSG00000003813	ENSMUSG00000003813.15	4579.45	-0.0395169	0.0835935	-0.472727	0.636408	0.912525	Rad23a
ENSMUSG00000003814	ENSMUSG00000003814.8	59256.1	0.100973	0.129228	0.781352	0.434596	0.81783	Calr
ENSMUSG00000003824	ENSMUSG00000003824.12	3078.37	0.103819	0.106764	0.972409	0.330847	0.757395	Syce2
ENSMUSG00000003847	ENSMUSG00000003847.16	2969.18	-0.023848	0.118343	-0.201515	0.840296	0.966367	Nfat5
ENSMUSG00000003848	ENSMUSG00000003848.14	1000.67	-0.0069059	0.102097	-0.0676408	0.946072	0.989708	Nob1
ENSMUSG00000003849	ENSMUSG00000003849.8	3286.66	0.0619877	0.0694137	0.893019	0.371847	0.786113	Nqo1
ENSMUSG00000003863	ENSMUSG00000003863.18	525.58	-0.0260794	0.107656	-0.242248	0.808588	0.958353	Ppfia3
ENSMUSG00000003865	ENSMUSG00000003865.16	2205.2	-0.0342968	0.142728	-0.240295	0.810101	0.958353	Gys1
ENSMUSG00000003868	ENSMUSG00000003868.14	2762.05	0.0737362	0.0912144	0.808384	0.41887	0.810866	Ruvbl2
ENSMUSG00000003872	ENSMUSG00000003872.9	122.185	0.0332314	0.142467	0.233257	0.815562	0.959579	Lin7b
ENSMUSG00000003873	ENSMUSG00000003873.11	2930.4	0.0347136	0.101635	0.341551	0.732689	0.938791	Bax
ENSMUSG00000003923	ENSMUSG00000003923.14	1840.29	0.0102464	0.0964122	0.106277	0.915363	0.984522	Tfam
ENSMUSG00000003929	ENSMUSG00000003929.10	447.727	0.12369	0.0925517	1.33644	0.181405	0.627222	Zfp81
ENSMUSG00000003934	ENSMUSG00000003934.5	165.007	0.0303945	0.128185	0.237115	0.812568	0.958721	Efnb3
ENSMUSG00000003948	ENSMUSG00000003948.17	1806.69	0.402075	0.12357	3.25384	0.00113857	0.0397728	Mmd
ENSMUSG00000003949	ENSMUSG00000003949.16	638.337	0.169566	0.108475	1.56318	0.11801	0.52813	Hlf
ENSMUSG00000003955	ENSMUSG00000003955.7	3656.1	-0.0109042	0.119405	-0.0913215	0.927237	0.985705	Fam162a
ENSMUSG00000003970	ENSMUSG00000003970.8	18494.4	0.124193	0.097769	1.27027	0.203988	0.652112	Rpl8
ENSMUSG00000003992	ENSMUSG00000003992.14	747.292	-0.0950109	0.106025	-0.896121	0.370188	0.785063	Ssbp2
ENSMUSG00000004018	ENSMUSG00000004018.9	356.934	0.103063	0.102324	1.00722	0.313828	0.747209	Fancl
ENSMUSG00000004031	ENSMUSG00000004031.13	2136.89	0.111505	0.082735	1.34774	0.177743	0.620338	Brinp2
ENSMUSG00000004032	ENSMUSG00000004032.10	1546.1	0.137182	0.0853097	1.60805	0.107824	0.510188	Gstm5
ENSMUSG00000004040	ENSMUSG00000004040.16	6205.92	-0.062536	0.067322	-0.928909	0.352936	0.773559	Stat3
ENSMUSG00000004043	ENSMUSG00000004043.14	578.848	0.183862	0.121823	1.50926	0.131232	0.552323	Stat5a
ENSMUSG00000004044	ENSMUSG00000004044.9	147.738	-0.0140805	0.143839	-0.0978903	0.922019	0.985705	Cavin1
ENSMUSG00000004054	ENSMUSG00000004054.8	1801.57	-0.267122	0.076797	-3.47829	0.000504619	0.0238784	Map3k11
ENSMUSG00000004056	ENSMUSG00000004056.15	8231.62	0.237999	0.0691348	3.44254	0.000576279	0.0260862	Akt2
ENSMUSG00000004069	ENSMUSG00000004069.16	2359.5	0.0242431	0.0833131	0.290988	0.771061	0.949297	Dnaja3
ENSMUSG00000004070	ENSMUSG00000004070.15	4014.11	0.0870614	0.108013	0.806024	0.420229	0.811474	Hmox2
ENSMUSG00000004071	ENSMUSG00000004071.12	2601.01	-0.00514651	0.0650946	-0.0790621	0.936983	0.98697	Cdip1
ENSMUSG00000004085	ENSMUSG00000004085.14	361.43	0.075235	0.102165	0.736409	0.461482	0.833916	Map3k20
ENSMUSG00000004096	ENSMUSG00000004096.9	2821.95	0.0676938	0.0820285	0.825247	0.409231	0.803007	Cwc15
ENSMUSG00000004099	ENSMUSG00000004099.16	8652.55	0.0631473	0.0873919	0.722575	0.469941	0.839788	Dnmt1
ENSMUSG00000004100	ENSMUSG00000004100.12	1068.03	0.0270078	0.0808263	0.334146	0.738269	0.940121	Ppan
ENSMUSG00000004110	ENSMUSG00000004110.15	73.9939	0.0310136	0.143489	0.216139	0.828879	0.963218	Cacna1e
ENSMUSG00000004113	ENSMUSG00000004113.18	680.828	0.13265	0.128405	1.03306	0.301577	0.739665	Cacna1b
ENSMUSG00000004127	ENSMUSG00000004127.12	311.309	-0.0784259	0.12804	-0.61251	0.540201	0.873794	Trmt10a
ENSMUSG00000004151	ENSMUSG00000004151.16	7001.82	0.0439625	0.111636	0.393802	0.693728	0.932437	Etv1
ENSMUSG00000004187	ENSMUSG00000004187.10	340.682	0.0851243	0.11216	0.758955	0.44788	0.824078	Kifc2
ENSMUSG00000004207	ENSMUSG00000004207.14	47294.5	-0.0136981	0.0564097	-0.242832	0.808135	0.958353	Psap
ENSMUSG00000004221	ENSMUSG00000004221.16	1035.37	-0.0229248	0.082506	-0.277857	0.781123	0.951572	Ikbkg
ENSMUSG00000004231	ENSMUSG00000004231.15	319.873	0.0956838	0.144351	0.662854	0.507424	0.85875	Pax2
ENSMUSG00000004233	ENSMUSG00000004233.14	298.273	0.0602944	0.109816	0.549051	0.582971	0.892926	Wars2
ENSMUSG00000004263	ENSMUSG00000004263.15	3677.25	-0.0305999	0.0951065	-0.321743	0.747647	0.942084	Atn1
ENSMUSG00000004264	ENSMUSG00000004264.17	4337.75	0.0502065	0.0772758	0.649705	0.515883	0.863054	Phb2
ENSMUSG00000004266	ENSMUSG00000004266.15	979.799	0.101263	0.120258	0.842047	0.399762	0.799703	Ptpn6
ENSMUSG00000004267	ENSMUSG00000004267.16	1931.3	-0.191074	0.102675	-1.86095	0.0627506	0.404145	Eno2
ENSMUSG00000004268	ENSMUSG00000004268.11	1885.47	0.087842	0.0861179	1.02002	0.307719	0.743099	Emg1
ENSMUSG00000004270	ENSMUSG00000004270.13	2806.73	0.187079	0.101501	1.84313	0.0653106	0.411796	Lpcat3
ENSMUSG00000004285	ENSMUSG00000004285.12	4383.58	0.0496025	0.0968212	0.51231	0.608434	0.903796	Atp6v1f
ENSMUSG00000004317	ENSMUSG00000004317.14	1130.54	0.413427	0.104526	3.95527	7.64e-05	0.00678397	Clcn5
ENSMUSG00000004319	ENSMUSG00000004319.15	7013.25	0.0718967	0.136872	0.525285	0.599385	0.898925	Clcn3
ENSMUSG00000004347	ENSMUSG00000004347.16	6196.64	0.0802493	0.0897074	0.894567	0.371019	0.785665	Pde1c
ENSMUSG00000004356	ENSMUSG00000004356.7	991.058	0.00888358	0.0935301	0.0949809	0.92433	0.985705	Utp20
ENSMUSG00000004360	ENSMUSG00000004360.9	574.26	0.0544205	0.0964478	0.564248	0.572585	0.889939	9330159F19Rik
ENSMUSG00000004364	ENSMUSG00000004364.14	5646.42	0.138547	0.0715111	1.93742	0.0526942	0.372482	Cul3
ENSMUSG00000004371	ENSMUSG00000004371.14	43.772	0.184025	0.145884	1.26145	0.207146	0.6549	Il11
ENSMUSG00000004383	ENSMUSG00000004383.18	410.613	-0.188086	0.0898324	-2.09374	0.0362827	0.307345	Large1
ENSMUSG00000004393	ENSMUSG00000004393.10	1475.25	0.0979505	0.0846295	1.1574	0.247107	0.695372	Ddx56
ENSMUSG00000004394	ENSMUSG00000004394.12	5033.76	0.0650113	0.0605085	1.07442	0.282636	0.723754	Tmed4
ENSMUSG00000004446	ENSMUSG00000004446.12	160.537	-0.225679	0.133656	-1.6885	0.0913149	0.474778	Bid
ENSMUSG00000004451	ENSMUSG00000004451.14	774.878	-0.04949	0.0762306	-0.649215	0.516199	0.863162	Ralb
ENSMUSG00000004455	ENSMUSG00000004455.16	13498.7	0.164054	0.0850292	1.92938	0.0536836	0.375308	Ppp1cc
ENSMUSG00000004460	ENSMUSG00000004460.16	5123.99	0.044275	0.0763609	0.579812	0.562041	0.885011	Dnajb11
ENSMUSG00000004462	ENSMUSG00000004462.6	747.854	0.0233442	0.0717191	0.325495	0.744807	0.941183	Tbccd1
ENSMUSG00000004473	ENSMUSG00000004473.10	117.348	-0.194267	0.1459	-1.33151	0.183022	0.629886	Clec11a
ENSMUSG00000004500	ENSMUSG00000004500.9	710.7	-0.031265	0.0955149	-0.327332	0.743417	0.940717	Zfp324
ENSMUSG00000004508	ENSMUSG00000004508.6	371.393	0.0186521	0.0800643	0.232964	0.815789	0.959579	Gab2
ENSMUSG00000004530	ENSMUSG00000004530.12	4161.02	0.177083	0.0987785	1.79273	0.0730163	0.431177	Coro1c
ENSMUSG00000004535	ENSMUSG00000004535.12	5531.83	-0.0504918	0.0457436	-1.1038	0.269679	0.712834	Tax1bp1
ENSMUSG00000004558	ENSMUSG00000004558.14	396.242	-0.108597	0.138645	-0.783277	0.433464	0.817251	Ndrg2
ENSMUSG00000004561	ENSMUSG00000004561.14	658.531	-0.0255586	0.0938274	-0.2724	0.785314	0.953405	Mettl17
ENSMUSG00000004562	ENSMUSG00000004562.16	360.569	0.210789	0.124688	1.69053	0.0909262	0.474214	Arhgef40
ENSMUSG00000004565	ENSMUSG00000004565.15	1715.29	0.0201254	0.122197	0.164697	0.869183	0.974861	Pnpla6
ENSMUSG00000004567	ENSMUSG00000004567.16	2317.88	-0.0295717	0.11707	-0.252597	0.800579	0.956588	Mcoln1
ENSMUSG00000004568	ENSMUSG00000004568.12	1098	0.00689496	0.0851573	0.0809674	0.935468	0.986761	Arhgef18
ENSMUSG00000004591	ENSMUSG00000004591.16	1721.02	-0.0457953	0.0882092	-0.519167	0.603644	0.90085	Pkn2
ENSMUSG00000004610	ENSMUSG00000004610.4	2219.66	0.118641	0.13359	0.888099	0.374487	0.787458	Etfb
ENSMUSG00000004626	ENSMUSG00000004626.14	3110.95	0.0606374	0.0618382	0.980581	0.326799	0.754362	Stxbp2
ENSMUSG00000004637	ENSMUSG00000004637.15	777.83	0.112137	0.0954857	1.17438	0.240242	0.688236	Wwox
ENSMUSG00000004642	ENSMUSG00000004642.13	4492.53	0.125895	0.071659	1.75687	0.0789407	0.445187	Slbp
ENSMUSG00000004661	ENSMUSG00000004661.15	452.84	-0.124526	0.108176	-1.15114	0.249675	0.696307	Arid3b
ENSMUSG00000004665	ENSMUSG00000004665.10	50.9043	-0.10971	0.14589	-0.752002	0.45205	0.82718	Cnn2
ENSMUSG00000004667	ENSMUSG00000004667.18	1558.72	-0.0181784	0.0916619	-0.198321	0.842794	0.967136	Polr2e
ENSMUSG00000004677	ENSMUSG00000004677.17	1995.75	0.0917574	0.0956131	0.959675	0.337219	0.760159	Myo9b
ENSMUSG00000004698	ENSMUSG00000004698.10	193.8	-0.380238	0.131629	-2.88871	0.00386823	0.0896129	Hdac9
ENSMUSG00000004748	ENSMUSG00000004748.5	522.471	-0.392394	0.109173	-3.59424	0.000325336	0.0179701	Mtfp1
ENSMUSG00000004768	ENSMUSG00000004768.14	1152.57	-0.0843716	0.0929009	-0.90819	0.363778	0.781416	Rab23
ENSMUSG00000004771	ENSMUSG00000004771.12	3571.77	0.042356	0.0952636	0.444619	0.656595	0.921052	Rab11a
ENSMUSG00000004788	ENSMUSG00000004788.11	1815.02	-0.0224264	0.0967886	-0.231705	0.816767	0.959822	Eif2b2
ENSMUSG00000004789	ENSMUSG00000004789.9	4360.61	0.0717574	0.0888639	0.807498	0.41938	0.811384	Dlst
ENSMUSG00000004798	ENSMUSG00000004798.14	1285.45	-0.118245	0.0935348	-1.26419	0.206163	0.653818	Ulk2
ENSMUSG00000004815	ENSMUSG00000004815.12	779.726	0.0975082	0.0878153	1.11038	0.266836	0.709811	Dgkq
ENSMUSG00000004843	ENSMUSG00000004843.6	1581.18	0.181821	0.0902368	2.01493	0.0439116	0.337833	Chmp2b
ENSMUSG00000004846	ENSMUSG00000004846.10	3158.16	-0.0726395	0.12052	-0.602717	0.546697	0.876524	Plod3
ENSMUSG00000004849	ENSMUSG00000004849.14	3758.35	-0.0124683	0.113294	-0.110053	0.912368	0.983954	Ap1s1
ENSMUSG00000004864	ENSMUSG00000004864.12	409.187	0.0567638	0.118144	0.480462	0.630899	0.911457	Mapk13
ENSMUSG00000004865	ENSMUSG00000004865.15	2618.88	-0.0115841	0.0779449	-0.148619	0.881854	0.97678	Srpk1
ENSMUSG00000004880	ENSMUSG00000004880.11	2516.89	0.0656043	0.0955622	0.686509	0.492392	0.852803	Lbr
ENSMUSG00000004891	ENSMUSG00000004891.16	3893.72	-0.107342	0.0952859	-1.12653	0.259942	0.704211	Nes
ENSMUSG00000004892	ENSMUSG00000004892.13	617.358	-0.0804368	0.136906	-0.587531	0.556847	0.882858	Bcan
ENSMUSG00000004895	ENSMUSG00000004895.9	1800.71	0.0470245	0.0698502	0.67322	0.500808	0.855664	Prcc
ENSMUSG00000004896	ENSMUSG00000004896.16	915.041	-0.105189	0.0855805	-1.22913	0.219023	0.669212	Rrnad1
ENSMUSG00000004897	ENSMUSG00000004897.16	7536.6	0.00122959	0.0648131	0.0189713	0.984864	0.997439	Hdgf
ENSMUSG00000004929	ENSMUSG00000004929.12	2008.92	0.109527	0.0758047	1.44486	0.148496	0.581075	Thop1
ENSMUSG00000004931	ENSMUSG00000004931.10	1042.06	0.0677772	0.107618	0.629796	0.528828	0.869382	Apba3
ENSMUSG00000004933	ENSMUSG00000004933.17	226.905	0.0502981	0.119859	0.419643	0.674747	0.927604	Matk
ENSMUSG00000004934	ENSMUSG00000004934.13	977.366	-0.0445061	0.0905645	-0.49143	0.623122	0.907988	Pias4
ENSMUSG00000004936	ENSMUSG00000004936.8	2745.59	-0.0580719	0.142243	-0.408258	0.683084	0.930324	Map2k1
ENSMUSG00000004937	ENSMUSG00000004937.5	4023.37	0.070683	0.0650422	1.08673	0.277158	0.71903	Sgta
ENSMUSG00000004945	ENSMUSG00000004945.15	1651.62	0.0899896	0.106242	0.847026	0.396981	0.797477	Tmem242
ENSMUSG00000004947	ENSMUSG00000004947.15	1691.33	0.33609	0.068546	4.90313	9.43e-07	0.000274084	Dtx2
ENSMUSG00000004951	ENSMUSG00000004951.10	59.4098	-0.0614139	0.145657	-0.421633	0.673293	0.927156	Hspb1
ENSMUSG00000004961	ENSMUSG00000004961.7	2638.45	0.0749558	0.0933163	0.803245	0.421833	0.812368	Syt5
ENSMUSG00000004980	ENSMUSG00000004980.16	27149.5	0.0444167	0.0890707	0.498668	0.618014	0.907302	Hnrnpa2b1
ENSMUSG00000004994	ENSMUSG00000004994.12	596.869	-0.108567	0.10044	-1.08091	0.279735	0.7213	Ccdc130
ENSMUSG00000004996	ENSMUSG00000004996.9	729.202	-0.00685352	0.126589	-0.0541399	0.956824	0.992986	Mri1
ENSMUSG00000005034	ENSMUSG00000005034.15	3230.46	-0.0764297	0.0998848	-0.765178	0.444166	0.823181	Prkacb
ENSMUSG00000005043	ENSMUSG00000005043.13	504.712	-0.1511	0.0933781	-1.61815	0.105631	0.504407	Sgsh
ENSMUSG00000005045	ENSMUSG00000005045.16	145.499	-0.175885	0.138007	-1.27446	0.2025	0.650197	Chd5
ENSMUSG00000005054	ENSMUSG00000005054.6	2178.11	0.117626	0.100673	1.1684	0.242647	0.689768	Cstb
ENSMUSG00000005057	ENSMUSG00000005057.13	40.6997	0.0803989	0.145312	0.553284	0.580069	0.892779	Sh2b2
ENSMUSG00000005069	ENSMUSG00000005069.12	1364.59	0.111607	0.0708034	1.5763	0.114957	0.522571	Pex5
ENSMUSG00000005078	ENSMUSG00000005078.16	1079.54	-0.0785972	0.0930859	-0.844351	0.398473	0.798847	Jkamp
ENSMUSG00000005087	ENSMUSG00000005087.17	418.795	-0.254026	0.128575	-1.9757	0.0481893	0.354316	Cd44
ENSMUSG00000005102	ENSMUSG00000005102.13	538.994	-0.0214335	0.0874502	-0.245094	0.806384	0.958353	Eif2ak4
ENSMUSG00000005103	ENSMUSG00000005103.12	3394.27	-0.0513899	0.105174	-0.488619	0.625111	0.908091	Wdr1
ENSMUSG00000005107	ENSMUSG00000005107.13	110.662	-0.155554	0.143376	-1.08493	0.277951	0.719894	Slc2a9
ENSMUSG00000005125	ENSMUSG00000005125.12	4915.45	-0.0376537	0.119606	-0.314815	0.752902	0.943694	Ndrg1
ENSMUSG00000005131	ENSMUSG00000005131.4	114.636	-0.0478381	0.1377	-0.347408	0.728285	0.938587	4930550C14Rik
ENSMUSG00000005142	ENSMUSG00000005142.10	4293.18	-0.177557	0.0892893	-1.98856	0.04675	0.34872	Man2b1
ENSMUSG00000005148	ENSMUSG00000005148.7	37.8263	-0.216857	0.144197	-1.50389	0.13261	0.555041	Klf5
ENSMUSG00000005150	ENSMUSG00000005150.16	925.078	0.0766221	0.0951458	0.805312	0.420639	0.811706	Wdr83
ENSMUSG00000005161	ENSMUSG00000005161.15	10027.2	0.123945	0.0931396	1.33074	0.183274	0.630133	Prdx2
ENSMUSG00000005198	ENSMUSG00000005198.15	7781.05	-0.0387908	0.0982201	-0.394938	0.692889	0.932283	Polr2a
ENSMUSG00000005204	ENSMUSG00000005204.12	2532.72	-0.0386612	0.0800509	-0.482958	0.629126	0.910993	Senp3
ENSMUSG00000005225	ENSMUSG00000005225.15	742.976	-0.117165	0.0886426	-1.32177	0.186244	0.632483	Plekha8
ENSMUSG00000005232	ENSMUSG00000005232.11	52494.9	0.341992	0.0809424	4.22513	2.39e-05	0.00277575	G6pc2
ENSMUSG00000005233	ENSMUSG00000005233.16	30599.6	0.0583037	0.104808	0.556291	0.578012	0.891871	Spc25
ENSMUSG00000005237	ENSMUSG00000005237.14	119.057	-0.0011198	0.121477	-0.00921825	0.992645	0.998539	Dnah2
ENSMUSG00000005251	ENSMUSG00000005251.14	2071.15	0.0611431	0.108017	0.566051	0.571359	0.889478	Ripk4
ENSMUSG00000005262	ENSMUSG00000005262.12	2645.57	0.0588585	0.0645393	0.911978	0.36178	0.779861	Ufd1
ENSMUSG00000005267	ENSMUSG00000005267.13	310.892	-0.0796134	0.102731	-0.774968	0.438359	0.819745	Zfp287
ENSMUSG00000005268	ENSMUSG00000005268.20	1765.92	0.108198	0.14008	0.7724	0.439877	0.820748	Prlr
ENSMUSG00000005299	ENSMUSG00000005299.6	3204.75	0.16604	0.0986442	1.68323	0.0923314	0.477085	Letm1
ENSMUSG00000005312	ENSMUSG00000005312.14	5184.07	0.0820595	0.0641934	1.27832	0.201138	0.648578	Ubqln1
ENSMUSG00000005338	ENSMUSG00000005338.13	455.862	0.00846737	0.132902	0.0637114	0.9492	0.991149	Cadm3
ENSMUSG00000005354	ENSMUSG00000005354.15	3154.75	0.114514	0.0981462	1.16677	0.243305	0.690499	Txn2
ENSMUSG00000005362	ENSMUSG00000005362.14	919.561	0.061365	0.0914531	0.670999	0.502221	0.856225	Crbn
ENSMUSG00000005370	ENSMUSG00000005370.3	2876.34	0.0439917	0.0695136	0.63285	0.526832	0.868304	Msh6
ENSMUSG00000005371	ENSMUSG00000005371.14	1895.92	0.0474819	0.0906374	0.523867	0.600371	0.899005	Fbxo11
ENSMUSG00000005373	ENSMUSG00000005373.13	7509.66	-0.128942	0.126604	-1.01846	0.308458	0.743099	Mlxipl
ENSMUSG00000005374	ENSMUSG00000005374.13	3485.12	0.0516412	0.127641	0.404582	0.685785	0.931173	Tbl2
ENSMUSG00000005378	ENSMUSG00000005378.17	1218.99	0.0840078	0.0975699	0.861001	0.389238	0.794584	Bud23
ENSMUSG00000005410	ENSMUSG00000005410.6	11212	0.2085	0.0813907	2.56172	0.0104155	0.157405	Mcm5
ENSMUSG00000005413	ENSMUSG00000005413.8	1576.25	0.225223	0.143297	1.57172	0.116015	0.525509	Hmox1
ENSMUSG00000005417	ENSMUSG00000005417.17	6774.37	0.0285714	0.0560976	0.509317	0.61053	0.90438	Mprip
ENSMUSG00000005442	ENSMUSG00000005442.13	4497.88	0.0637508	0.0775622	0.821932	0.411116	0.804628	Cic
ENSMUSG00000005447	ENSMUSG00000005447.12	2312.97	0.196524	0.0984424	1.99634	0.0458973	0.344757	Pafah1b3
ENSMUSG00000005469	ENSMUSG00000005469.10	5827.87	0.1925	0.0673766	2.85707	0.00427572	0.0952558	Prkaca
ENSMUSG00000005470	ENSMUSG00000005470.8	4527.37	-0.0290044	0.109237	-0.265517	0.790611	0.954487	Asf1b
ENSMUSG00000005481	ENSMUSG00000005481.18	3107.58	0.0674939	0.122686	0.550133	0.582228	0.892926	Ddx39
ENSMUSG00000005483	ENSMUSG00000005483.10	2714.53	0.0321172	0.118716	0.270537	0.786747	0.953755	Dnajb1
ENSMUSG00000005501	ENSMUSG00000005501.14	827.272	-0.00704077	0.0703849	-0.100032	0.920319	0.985705	Usp40
ENSMUSG00000005505	ENSMUSG00000005505.12	439.315	0.0803711	0.0780697	1.02948	0.303255	0.739759	Kbtbd4
ENSMUSG00000005506	ENSMUSG00000005506.16	2228.65	0.0602336	0.0802502	0.750572	0.45291	0.827496	Celf1
ENSMUSG00000005510	ENSMUSG00000005510.9	1610.92	0.145127	0.0971642	1.49363	0.135273	0.560855	Ndufs3
ENSMUSG00000005514	ENSMUSG00000005514.14	5449.93	0.139951	0.106682	1.31186	0.189567	0.637324	Por
ENSMUSG00000005533	ENSMUSG00000005533.10	5268.19	-0.0791927	0.0840363	-0.942363	0.346007	0.767495	Igf1r
ENSMUSG00000005534	ENSMUSG00000005534.10	885.761	-0.241649	0.119359	-2.02456	0.0429123	0.334271	Insr
ENSMUSG00000005553	ENSMUSG00000005553.14	970.877	0.0955495	0.133027	0.718272	0.47259	0.841589	Atp4a
ENSMUSG00000005566	ENSMUSG00000005566.14	10860	0.0964565	0.0958335	1.0065	0.314175	0.747256	Trim28
ENSMUSG00000005575	ENSMUSG00000005575.16	4107.95	0.186081	0.100027	1.86031	0.0628421	0.404145	Ube2m
ENSMUSG00000005580	ENSMUSG00000005580.11	915.787	0.0530405	0.135435	0.391629	0.695332	0.933115	Adcy9
ENSMUSG00000005609	ENSMUSG00000005609.16	1841.69	0.105759	0.0680768	1.55353	0.120297	0.533159	Ctr9
ENSMUSG00000005610	ENSMUSG00000005610.17	28272.5	0.11914	0.0838846	1.42028	0.155525	0.593972	Eif4g2
ENSMUSG00000005615	ENSMUSG00000005615.14	895.086	0.130583	0.0738719	1.76769	0.077112	0.440137	Pcyt1a
ENSMUSG00000005621	ENSMUSG00000005621.11	1234.75	-0.107269	0.122993	-0.872157	0.383123	0.790739	Zfp592
ENSMUSG00000005625	ENSMUSG00000005625.15	3695.96	0.17083	0.0909669	1.87793	0.0603904	0.396425	Psmd4
ENSMUSG00000005640	ENSMUSG00000005640.11	1953.04	0.0440576	0.121362	0.363027	0.716585	0.93588	Insrr
ENSMUSG00000005656	ENSMUSG00000005656.8	2631.1	0.192479	0.0660385	2.91464	0.00356094	0.0843336	Snx6
ENSMUSG00000005667	ENSMUSG00000005667.8	4766.39	0.0527774	0.143425	0.367979	0.712889	0.935647	Mthfd2
ENSMUSG00000005674	ENSMUSG00000005674.9	1390.17	0.0620586	0.117475	0.528273	0.59731	0.89784	Tomm40l
ENSMUSG00000005681	ENSMUSG00000005681.12	217.875	0.129055	0.142152	0.907869	0.363947	0.781496	Apoa2
ENSMUSG00000005682	ENSMUSG00000005682.8	785.128	-0.148383	0.116545	-1.27317	0.202956	0.650454	Pan2
ENSMUSG00000005683	ENSMUSG00000005683.7	8996.27	0.137898	0.0609711	2.2617	0.0237161	0.245557	Cs
ENSMUSG00000005687	ENSMUSG00000005687.14	2624.26	0.0177839	0.0832107	0.213721	0.830765	0.963218	Bcas2
ENSMUSG00000005698	ENSMUSG00000005698.15	3412.05	-0.0786625	0.0896846	-0.877102	0.380431	0.79028	Ctcf
ENSMUSG00000005699	ENSMUSG00000005699.16	1267.24	0.127217	0.11233	1.13253	0.257411	0.702636	Pard6a
ENSMUSG00000005716	ENSMUSG00000005716.16	44.9734	0.495213	0.142408	3.47743	0.000506252	0.0238784	Pvalb
ENSMUSG00000005718	ENSMUSG00000005718.7	219.552	-0.0681431	0.139034	-0.490117	0.624051	0.907988	Tfap4
ENSMUSG00000005732	ENSMUSG00000005732.14	2034.04	0.174101	0.0922197	1.88789	0.0590402	0.391852	Ranbp1
ENSMUSG00000005774	ENSMUSG00000005774.12	696.99	-0.0706332	0.108422	-0.651466	0.514746	0.862556	Rfx5
ENSMUSG00000005779	ENSMUSG00000005779.12	7219.48	0.157058	0.101761	1.54341	0.122732	0.535747	Psmb4
ENSMUSG00000005802	ENSMUSG00000005802.12	1230.94	-0.100471	0.0685457	-1.46576	0.142714	0.572013	Slc30a4
ENSMUSG00000005803	ENSMUSG00000005803.14	776.537	0.0344531	0.108689	0.316989	0.751252	0.942821	Sqor
ENSMUSG00000005804	ENSMUSG00000005804.14	771.357	0.0608661	0.0863842	0.704597	0.481061	0.846451	Bloc1s6
ENSMUSG00000005813	ENSMUSG00000005813.12	2134.28	0.0715595	0.0731223	0.978628	0.327764	0.754804	Metap1
ENSMUSG00000005823	ENSMUSG00000005823.8	2055.93	-0.115787	0.0949667	-1.21924	0.222755	0.672985	Gpr108
ENSMUSG00000005846	ENSMUSG00000005846.11	2617.4	0.0467821	0.0716838	0.652617	0.514003	0.862501	Rsl1d1
ENSMUSG00000005871	ENSMUSG00000005871.14	2561.43	0.0360893	0.10396	0.347144	0.728483	0.938587	Apc
ENSMUSG00000005873	ENSMUSG00000005873.5	9513.93	0.0266316	0.093607	0.284504	0.776024	0.950348	Reep5
ENSMUSG00000005881	ENSMUSG00000005881.13	5660.67	-0.0156309	0.105962	-0.147514	0.882726	0.976958	Ergic3
ENSMUSG00000005882	ENSMUSG00000005882.18	1112.96	0.0576325	0.0735136	0.783971	0.433057	0.817148	Uqcc1
ENSMUSG00000005886	ENSMUSG00000005886.14	1421.53	-0.11684	0.122547	-0.953429	0.340373	0.763413	Ncoa2
ENSMUSG00000005893	ENSMUSG00000005893.14	2481.6	-0.0679015	0.101925	-0.666192	0.505288	0.857566	Nr2c2
ENSMUSG00000005897	ENSMUSG00000005897.14	469.694	-0.127096	0.0877988	-1.44758	0.147735	0.579628	Nr2c1
ENSMUSG00000005899	ENSMUSG00000005899.12	1722.75	0.0952607	0.103434	0.920977	0.357062	0.775443	Smpd4
ENSMUSG00000005907	ENSMUSG00000005907.14	849.488	-0.00983261	0.0910956	-0.107937	0.914045	0.983954	Pex1
ENSMUSG00000005917	ENSMUSG00000005917.15	43.0768	-0.133341	0.137878	-0.967093	0.333497	0.758918	Otx1
ENSMUSG00000005936	ENSMUSG00000005936.18	3559.91	0.0237078	0.101041	0.234635	0.814492	0.959419	Kctd20
ENSMUSG00000005947	ENSMUSG00000005947.11	36.5801	-0.0986821	0.143461	-0.687869	0.491535	0.852803	Itgae
ENSMUSG00000005949	ENSMUSG00000005949.9	1081.71	0.0455865	0.142798	0.319238	0.749546	0.942352	Ctns
ENSMUSG00000005951	ENSMUSG00000005951.13	221.805	0.0427347	0.115981	0.368464	0.712528	0.935647	Shpk
ENSMUSG00000005952	ENSMUSG00000005952.15	606.242	0.101509	0.130015	0.780752	0.434948	0.81783	Trpv1
ENSMUSG00000005968	ENSMUSG00000005968.14	799.765	0.0384469	0.116137	0.331049	0.740608	0.940232	Tuft1
ENSMUSG00000005973	ENSMUSG00000005973.6	140.059	-0.0304162	0.145653	-0.208827	0.834583	0.964682	Rcn1
ENSMUSG00000005980	ENSMUSG00000005980.15	103.374	0.115627	0.141672	0.81616	0.414409	0.807888	Dnase1
ENSMUSG00000005981	ENSMUSG00000005981.11	1716.85	0.063471	0.0781623	0.812041	0.416768	0.808789	Trap1
ENSMUSG00000005982	ENSMUSG00000005982.13	2742.42	0.0287141	0.0759509	0.378062	0.705385	0.934791	Naa60
ENSMUSG00000005983	ENSMUSG00000005983.15	359.735	-0.0275126	0.139273	-0.197545	0.843401	0.967288	1700037C18Rik
ENSMUSG00000005986	ENSMUSG00000005986.15	184.695	0.247875	0.13713	1.80758	0.0706711	0.425044	Ankrd13d
ENSMUSG00000006005	ENSMUSG00000006005.17	5550.46	0.0467556	0.0863643	0.541377	0.588248	0.894348	Tpr
ENSMUSG00000006010	ENSMUSG00000006010.14	1412.31	-0.251231	0.124753	-2.01384	0.0440268	0.337833	BC003331
ENSMUSG00000006019	ENSMUSG00000006019.15	1438.33	-0.00452641	0.123377	-0.0366878	0.970734	0.995539	Dhx34
ENSMUSG00000006021	ENSMUSG00000006021.5	688.74	0.0247959	0.1132	0.219045	0.826615	0.962521	Kptn
ENSMUSG00000006024	ENSMUSG00000006024.13	10227.4	-0.0235961	0.058882	-0.400735	0.688615	0.931407	Napa
ENSMUSG00000006050	ENSMUSG00000006050.11	3329.47	0.0528095	0.0928362	0.568846	0.569461	0.888674	Sra1
ENSMUSG00000006057	ENSMUSG00000006057.15	7459.07	0.319974	0.101365	3.15667	0.00159584	0.0493788	Atp5g1
ENSMUSG00000006058	ENSMUSG00000006058.10	1943.43	0.109602	0.10454	1.04843	0.294441	0.733828	Snf8
ENSMUSG00000006095	ENSMUSG00000006095.12	2629.33	0.180355	0.139745	1.2906	0.196843	0.643523	Tbcb
ENSMUSG00000006127	ENSMUSG00000006127.9	710.221	-0.23251	0.0909714	-2.55586	0.0105927	0.158985	Inpp5k
ENSMUSG00000006134	ENSMUSG00000006134.3	1320.06	0.0517574	0.118184	0.437941	0.661429	0.923825	Crkl
ENSMUSG00000006154	ENSMUSG00000006154.13	50.6768	-0.171263	0.121563	-1.40884	0.158882	0.59683	Eps8l1
ENSMUSG00000006169	ENSMUSG00000006169.19	2956.67	0.0902223	0.0900711	1.00168	0.316498	0.749315	Clint1
ENSMUSG00000006179	ENSMUSG00000006179.8	709.179	0.0198963	0.100606	0.197765	0.843229	0.967257	Prss16
ENSMUSG00000006191	ENSMUSG00000006191.17	437.338	0.0959764	0.08064	1.19018	0.233974	0.68322	Cdkal1
ENSMUSG00000006215	ENSMUSG00000006215.12	666.595	-0.0475281	0.0919723	-0.516766	0.60532	0.902142	Zbtb17
ENSMUSG00000006218	ENSMUSG00000006218.4	37.6969	-0.0785692	0.145383	-0.540427	0.588902	0.894745	Fam131c
ENSMUSG00000006241	ENSMUSG00000006241.16	168.601	0.00809215	0.119168	0.0679054	0.945861	0.989708	Ccdc159
ENSMUSG00000006262	ENSMUSG00000006262.15	1553.76	0.0320258	0.0735584	0.435379	0.663288	0.924638	Mob1b
ENSMUSG00000006273	ENSMUSG00000006273.14	12239.6	0.0792769	0.0894735	0.886038	0.375597	0.78793	Atp6v1b2
ENSMUSG00000006276	ENSMUSG00000006276.10	2321.41	0.103688	0.0820139	1.26427	0.206133	0.653818	Eps15l1
ENSMUSG00000006281	ENSMUSG00000006281.7	770.934	0.0377049	0.0984411	0.38302	0.701705	0.934077	Tep1
ENSMUSG00000006288	ENSMUSG00000006288.7	950.481	0.000751323	0.100699	0.00746109	0.994047	0.998655	Ttc5
ENSMUSG00000006289	ENSMUSG00000006289.14	1305.09	0.0538991	0.112965	0.477132	0.633268	0.912362	Osgep
ENSMUSG00000006299	ENSMUSG00000006299.13	5121.55	0.131082	0.10259	1.27772	0.201347	0.648649	Aamp
ENSMUSG00000006301	ENSMUSG00000006301.17	221.926	0.0433124	0.112089	0.386413	0.699191	0.933914	Tmbim1
ENSMUSG00000006304	ENSMUSG00000006304.14	5186.8	0.113842	0.08849	1.2865	0.198269	0.645235	Arpc2
ENSMUSG00000006307	ENSMUSG00000006307.16	1956.78	-0.0419604	0.0744246	-0.563798	0.572892	0.889998	Kmt2b
ENSMUSG00000006310	ENSMUSG00000006310.10	75.4169	-0.217103	0.123498	-1.75794	0.0787572	0.445187	Zbtb32
ENSMUSG00000006315	ENSMUSG00000006315.9	6019.67	0.17093	0.0968834	1.76429	0.0776831	0.441948	Tmem147
ENSMUSG00000006333	ENSMUSG00000006333.14	14817.5	0.119425	0.100958	1.18293	0.236838	0.685759	Rps9
ENSMUSG00000006335	ENSMUSG00000006335.16	522.731	0.113207	0.0962772	1.17584	0.239658	0.688236	Tfpt
ENSMUSG00000006342	ENSMUSG00000006342.14	213.728	-0.114135	0.103193	-1.10603	0.268711	0.711911	Susd2
ENSMUSG00000006344	ENSMUSG00000006344.16	487.94	0.410579	0.137474	2.9866	0.00282096	0.0727951	Ggt5
ENSMUSG00000006356	ENSMUSG00000006356.10	834.746	0.124927	0.0912168	1.36957	0.170822	0.612136	Crip2
ENSMUSG00000006360	ENSMUSG00000006360.11	1868.71	0.169972	0.123574	1.37547	0.168986	0.609508	Crip1
ENSMUSG00000006362	ENSMUSG00000006362.16	741.437	0.106708	0.145988	0.730933	0.46482	0.835932	Cbfa2t3
ENSMUSG00000006373	ENSMUSG00000006373.10	3436.86	0.0436234	0.085118	0.512505	0.608297	0.903796	Pgrmc1
ENSMUSG00000006378	ENSMUSG00000006378.13	4869.59	0.300941	0.0846341	3.55579	0.000376845	0.0197541	Gcat
ENSMUSG00000006390	ENSMUSG00000006390.15	1654.5	-0.149344	0.0853038	-1.75074	0.0799913	0.447373	Elovl1
ENSMUSG00000006392	ENSMUSG00000006392.16	1313.48	0.00474741	0.0783562	0.0605875	0.951688	0.99204	Med8
ENSMUSG00000006395	ENSMUSG00000006395.16	244.023	0.0451302	0.134151	0.336413	0.73656	0.939196	Hyi
ENSMUSG00000006398	ENSMUSG00000006398.15	4007.8	-0.014002	0.0887881	-0.157701	0.874692	0.97593	Cdc20
ENSMUSG00000006403	ENSMUSG00000006403.12	357.766	-0.1149	0.10983	-1.04617	0.295484	0.734835	Adamts4
ENSMUSG00000006411	ENSMUSG00000006411.12	199.289	0.0361423	0.136793	0.264212	0.791617	0.954496	Nectin4
ENSMUSG00000006412	ENSMUSG00000006412.10	1744.95	0.167008	0.095463	1.74946	0.0802122	0.447549	Pfdn2
ENSMUSG00000006418	ENSMUSG00000006418.17	2002.21	-0.172815	0.0745414	-2.31837	0.0204292	0.226057	Rnf114
ENSMUSG00000006423	ENSMUSG00000006423.15	1338.58	0.000544034	0.0959102	0.00567233	0.995474	0.998655	C330007P06Rik
ENSMUSG00000006435	ENSMUSG00000006435.15	1083.18	-0.220461	0.126975	-1.73625	0.0825195	0.454112	Neurl1a
ENSMUSG00000006442	ENSMUSG00000006442.10	2253.51	0.283759	0.0762126	3.72326	0.000196665	0.0127362	Srm
ENSMUSG00000006445	ENSMUSG00000006445.3	121.102	-0.171845	0.143777	-1.19522	0.232003	0.681728	Epha2
ENSMUSG00000006456	ENSMUSG00000006456.10	2284.02	-0.0230913	0.0589958	-0.391407	0.695497	0.933115	Rbm14
ENSMUSG00000006457	ENSMUSG00000006457.3	62.7269	0.404869	0.143947	2.81262	0.004914	0.102353	Actn3
ENSMUSG00000006463	ENSMUSG00000006463.13	918.806	-0.144897	0.0846663	-1.71139	0.0870099	0.464219	Zdhhc24
ENSMUSG00000006464	ENSMUSG00000006464.8	946.397	0.0208003	0.0744589	0.279353	0.779974	0.951422	Bbs1
ENSMUSG00000006471	ENSMUSG00000006471.18	797.394	-0.017378	0.112007	-0.155151	0.876703	0.976116	Ndor1
ENSMUSG00000006476	ENSMUSG00000006476.19	2282.3	-0.0647842	0.074348	-0.871364	0.383555	0.790739	Nsmf
ENSMUSG00000006494	ENSMUSG00000006494.11	4108.5	-0.0461111	0.11116	-0.414819	0.678274	0.928688	Pdk1
ENSMUSG00000006498	ENSMUSG00000006498.16	11734.7	0.0585994	0.0447356	1.3099	0.190228	0.637983	Ptbp1
ENSMUSG00000006517	ENSMUSG00000006517.5	701.678	0.292532	0.111941	2.61326	0.00896819	0.144251	Mvd
ENSMUSG00000006526	ENSMUSG00000006526.11	493.078	0.137407	0.113827	1.20716	0.22737	0.676705	Tmem110
ENSMUSG00000006527	ENSMUSG00000006527.14	1799.09	-0.0446219	0.0851222	-0.52421	0.600132	0.898993	Sfmbt1
ENSMUSG00000006546	ENSMUSG00000006546.3	2064.58	0.195471	0.145007	1.34801	0.177655	0.620338	Cryba2
ENSMUSG00000006567	ENSMUSG00000006567.11	230.217	0.0520269	0.144194	0.360812	0.71824	0.935997	Atp7b
ENSMUSG00000006575	ENSMUSG00000006575.14	8123.83	0.0879668	0.080611	1.09125	0.275163	0.716915	Rundc3a
ENSMUSG00000006576	ENSMUSG00000006576.16	1400.26	0.117084	0.123544	0.947716	0.343274	0.765528	Slc4a3
ENSMUSG00000006585	ENSMUSG00000006585.3	2575.35	0.115691	0.0723621	1.59878	0.10987	0.513147	Cdt1
ENSMUSG00000006586	ENSMUSG00000006586.15	1415.76	-0.0365159	0.131792	-0.277073	0.781724	0.951693	Runx1t1
ENSMUSG00000006589	ENSMUSG00000006589.8	1875.99	0.183973	0.115026	1.59941	0.10973	0.512855	Aprt
ENSMUSG00000006599	ENSMUSG00000006599.13	1532.6	-0.0309675	0.109442	-0.282957	0.777209	0.950382	Gtf2h1
ENSMUSG00000006611	ENSMUSG00000006611.14	739.05	0.106299	0.138531	0.767333	0.442884	0.822532	Hfe
ENSMUSG00000006641	ENSMUSG00000006641.12	547.171	0.230639	0.089584	2.57455	0.0100369	0.153467	Slc5a6
ENSMUSG00000006651	ENSMUSG00000006651.8	15332.6	-0.093653	0.0542184	-1.72733	0.0841086	0.457758	Aplp1
ENSMUSG00000006673	ENSMUSG00000006673.14	2404.39	-0.0817295	0.0990688	-0.824977	0.409385	0.803007	Qrich1
ENSMUSG00000006675	ENSMUSG00000006675.10	676.328	-0.159302	0.109873	-1.44988	0.147092	0.578629	P4htm
ENSMUSG00000006676	ENSMUSG00000006676.16	4225.57	-0.024237	0.0943335	-0.256929	0.797234	0.955973	Usp19
ENSMUSG00000006678	ENSMUSG00000006678.6	2002.65	0.0599709	0.106715	0.561975	0.574133	0.890306	Pola1
ENSMUSG00000006699	ENSMUSG00000006699.17	13115.3	0.111092	0.0773762	1.43574	0.151077	0.585176	Cdc42
ENSMUSG00000006705	ENSMUSG00000006705.12	1437.4	-0.143817	0.0981065	-1.46593	0.142669	0.572013	Pknox1
ENSMUSG00000006711	ENSMUSG00000006711.15	311.25	0.27112	0.130614	2.07573	0.0379187	0.316194	D130043K22Rik
ENSMUSG00000006715	ENSMUSG00000006715.11	1696.93	0.130308	0.089604	1.45426	0.145873	0.576038	Gmnn
ENSMUSG00000006717	ENSMUSG00000006717.6	1226.62	0.086818	0.10637	0.816188	0.414393	0.807888	Acot13
ENSMUSG00000006720	ENSMUSG00000006720.16	167.147	-0.00368167	0.122023	-0.030172	0.97593	0.996296	Zfp184
ENSMUSG00000006728	ENSMUSG00000006728.12	8632.55	0.0367008	0.0913252	0.401869	0.68778	0.931173	Cdk4
ENSMUSG00000006731	ENSMUSG00000006731.9	66.7023	-0.473354	0.132856	-3.56292	0.000366758	0.0193906	B4galnt1
ENSMUSG00000006732	ENSMUSG00000006732.14	998.81	0.0434628	0.103711	0.419077	0.67516	0.927604	Mettl1
ENSMUSG00000006736	ENSMUSG00000006736.8	3417	0.0202298	0.07048	0.287029	0.77409	0.949821	Tspan31
ENSMUSG00000006740	ENSMUSG00000006740.13	2680.62	0.0611342	0.113333	0.539424	0.589595	0.895276	Kif5b
ENSMUSG00000006763	ENSMUSG00000006763.14	745.901	-0.0708125	0.0850005	-0.833083	0.404798	0.800908	Saal1
ENSMUSG00000006764	ENSMUSG00000006764.8	126.221	-0.0860051	0.140481	-0.612218	0.540394	0.873794	Tph2
ENSMUSG00000006782	ENSMUSG00000006782.16	549.917	-0.083991	0.0827125	-1.01546	0.309888	0.744076	Cnp
ENSMUSG00000006784	ENSMUSG00000006784.14	47.0536	-0.265513	0.139683	-1.90082	0.0573257	0.386285	Ttc25
ENSMUSG00000006800	ENSMUSG00000006800.13	503.63	-0.15356	0.129932	-1.18185	0.237266	0.685884	Sulf2
ENSMUSG00000006818	ENSMUSG00000006818.4	3355.79	0.195499	0.070912	2.75692	0.0058348	0.114003	Sod2
ENSMUSG00000006850	ENSMUSG00000006850.7	369.848	-0.0699967	0.0942317	-0.742815	0.457594	0.831647	Tmco6
ENSMUSG00000006906	ENSMUSG00000006906.10	1293.46	0.0181304	0.0847548	0.213916	0.830613	0.963218	Stambp
ENSMUSG00000006920	ENSMUSG00000006920.14	938.364	-0.0814157	0.0693227	-1.17445	0.240217	0.688236	Ezh1
ENSMUSG00000006930	ENSMUSG00000006930.15	5725.5	0.00156194	0.0876447	0.0178213	0.985781	0.997875	Hap1
ENSMUSG00000006931	ENSMUSG00000006931.15	1667.55	0.11284	0.0755564	1.49345	0.135319	0.560871	P3h4
ENSMUSG00000006932	ENSMUSG00000006932.17	13679.6	-0.0122762	0.059791	-0.205319	0.837323	0.965548	Ctnnb1
ENSMUSG00000006941	ENSMUSG00000006941.5	1801.18	0.0507274	0.113052	0.448708	0.653642	0.919812	Eif1b
ENSMUSG00000006998	ENSMUSG00000006998.15	11003.7	0.164658	0.0593961	2.7722	0.00556782	0.111082	Psmd2
ENSMUSG00000007021	ENSMUSG00000007021.4	1691.82	0.114159	0.0846702	1.34828	0.177568	0.620338	Syngr3
ENSMUSG00000007029	ENSMUSG00000007029.16	6057.32	0.0840512	0.096443	0.871512	0.383475	0.790739	Vars
ENSMUSG00000007035	ENSMUSG00000007035.15	123.977	-0.105264	0.146011	-0.720935	0.47095	0.840394	Msh5
ENSMUSG00000007036	ENSMUSG00000007036.15	3222.93	-0.0396619	0.0578795	-0.68525	0.493186	0.852803	Abhd16a
ENSMUSG00000007038	ENSMUSG00000007038.5	3321.19	-0.217327	0.136478	-1.59239	0.111296	0.515827	Neu1
ENSMUSG00000007039	ENSMUSG00000007039.12	420.376	0.245609	0.118961	2.06462	0.0389591	0.32091	Ddah2
ENSMUSG00000007041	ENSMUSG00000007041.9	3718.8	-0.0100074	0.100401	-0.0996745	0.920603	0.985705	Clic1
ENSMUSG00000007050	ENSMUSG00000007050.17	1130	0.036085	0.095698	0.377072	0.70612	0.934791	Lsm2
ENSMUSG00000007080	ENSMUSG00000007080.14	1990.66	0.0976824	0.0840753	1.16184	0.245299	0.693512	Pole
ENSMUSG00000007207	ENSMUSG00000007207.10	775.488	-0.103096	0.0835605	-1.23379	0.217283	0.667997	Stx1a
ENSMUSG00000007216	ENSMUSG00000007216.6	191.419	0.0743744	0.121812	0.610568	0.541486	0.874777	Zfp775
ENSMUSG00000007338	ENSMUSG00000007338.9	2101.63	0.191175	0.0815203	2.34512	0.0190209	0.217114	Mrpl49
ENSMUSG00000007379	ENSMUSG00000007379.15	105.323	-0.0692142	0.123861	-0.558805	0.576295	0.890536	Dennd2c
ENSMUSG00000007411	ENSMUSG00000007411.15	3345.68	-0.00227212	0.0531328	-0.042763	0.96589	0.994842	Mark3
ENSMUSG00000007415	ENSMUSG00000007415.15	2961.85	0.0249664	0.0649806	0.384214	0.70082	0.934077	Gatad1
ENSMUSG00000007440	ENSMUSG00000007440.10	420.938	-0.0262075	0.144638	-0.181194	0.856215	0.971472	Pcdha11
ENSMUSG00000007458	ENSMUSG00000007458.14	4999.72	-0.290228	0.0722733	-4.0157	5.93e-05	0.00550167	M6pr
ENSMUSG00000007476	ENSMUSG00000007476.18	741.059	0.0937335	0.0966608	0.969716	0.332188	0.758	Lrrc8a
ENSMUSG00000007564	ENSMUSG00000007564.14	10913	0.141238	0.100423	1.40643	0.159596	0.597737	Ppp2r1a
ENSMUSG00000007570	ENSMUSG00000007570.15	622.388	0.0888325	0.126147	0.7042	0.481308	0.846451	Fance
ENSMUSG00000007589	ENSMUSG00000007589.8	1446.94	0.0754173	0.0678628	1.11132	0.26643	0.709554	Tinf2
ENSMUSG00000007591	ENSMUSG00000007591.14	53.0824	-0.00655165	0.140226	-0.0467222	0.962735	0.994289	Tssk4
ENSMUSG00000007594	ENSMUSG00000007594.10	3473.78	-0.283111	0.112878	-2.50811	0.0121378	0.170953	Hapln4
ENSMUSG00000007603	ENSMUSG00000007603.8	1131.89	-0.0144892	0.0663297	-0.218442	0.827085	0.962625	Dus3l
ENSMUSG00000007610	ENSMUSG00000007610.15	566.251	0.0269784	0.101394	0.266074	0.790183	0.954487	Gtpbp3
ENSMUSG00000007613	ENSMUSG00000007613.15	1269.76	0.113635	0.105323	1.07892	0.280625	0.721619	Tgfbr1
ENSMUSG00000007617	ENSMUSG00000007617.17	496.67	-0.0442407	0.108461	-0.407894	0.683352	0.930558	Homer1
ENSMUSG00000007646	ENSMUSG00000007646.13	659.058	-0.132586	0.0743748	-1.78268	0.0746388	0.434159	Rad51c
ENSMUSG00000007656	ENSMUSG00000007656.13	4088.25	0.116509	0.0989264	1.17773	0.238903	0.687957	Arpp19
ENSMUSG00000007659	ENSMUSG00000007659.18	1727.28	0.0792656	0.0982615	0.806681	0.41985	0.81145	Bcl2l1
ENSMUSG00000007670	ENSMUSG00000007670.9	3961.47	0.0817693	0.0926505	0.882556	0.377476	0.788723	Khsrp
ENSMUSG00000007682	ENSMUSG00000007682.5	201.17	0.0903927	0.131245	0.688733	0.490991	0.852126	Dio2
ENSMUSG00000007721	ENSMUSG00000007721.6	2186.11	0.154191	0.105118	1.46684	0.14242	0.571875	Ccdc124
ENSMUSG00000007739	ENSMUSG00000007739.10	5869.57	0.140655	0.0656389	2.14286	0.0321244	0.287421	Cct4
ENSMUSG00000007777	ENSMUSG00000007777.9	1327.75	0.126677	0.0704623	1.7978	0.0722091	0.429142	0610009B22Rik
ENSMUSG00000007783	ENSMUSG00000007783.10	2084.77	-0.00840751	0.0707408	-0.11885	0.905395	0.982338	Cpt1c
ENSMUSG00000007812	ENSMUSG00000007812.16	816.083	-0.0959716	0.0938466	-1.02264	0.306477	0.742824	Zfp655
ENSMUSG00000007815	ENSMUSG00000007815.13	10654.9	0.0473624	0.0443578	1.06773	0.28564	0.726542	Rhoa
ENSMUSG00000007817	ENSMUSG00000007817.14	4779.25	0.0682503	0.101817	0.670324	0.502651	0.856225	Zmiz1
ENSMUSG00000007827	ENSMUSG00000007827.10	702.759	-0.0204225	0.115363	-0.177028	0.859486	0.972503	Ankrd26
ENSMUSG00000007833	ENSMUSG00000007833.15	1830.06	-0.113447	0.100018	-1.13426	0.256686	0.702235	Aldh16a1
ENSMUSG00000007836	ENSMUSG00000007836.6	3123.46	-0.0273922	0.103634	-0.264316	0.791536	0.954487	Hnrnpa0
ENSMUSG00000007837	ENSMUSG00000007837.11	1135.71	0.145056	0.0900429	1.61097	0.107187	0.508072	Prrg2
ENSMUSG00000007850	ENSMUSG00000007850.16	9732.89	0.0437044	0.0779953	0.560347	0.575243	0.890536	Hnrnph1
ENSMUSG00000007867	ENSMUSG00000007867.8	136.557	-0.0630669	0.131928	-0.478039	0.632622	0.911817	Ift43
ENSMUSG00000007872	ENSMUSG00000007872.3	4207.99	0.125151	0.12442	1.00588	0.314473	0.747423	Id3
ENSMUSG00000007880	ENSMUSG00000007880.16	3523.25	-0.118061	0.100965	-1.16932	0.242275	0.689628	Arid1a
ENSMUSG00000007888	ENSMUSG00000007888.15	329.905	-0.161016	0.128858	-1.24956	0.211462	0.660665	Crlf1
ENSMUSG00000007891	ENSMUSG00000007891.16	13691.3	-0.0617427	0.112801	-0.547359	0.584132	0.893087	Ctsd
ENSMUSG00000007892	ENSMUSG00000007892.8	14570.1	0.18669	0.108352	1.72299	0.0848901	0.459517	Rplp1
ENSMUSG00000007908	ENSMUSG00000007908.14	721.38	-0.0868457	0.1297	-0.669592	0.503118	0.856225	Hmgcll1
ENSMUSG00000007944	ENSMUSG00000007944.8	1141.86	0.213619	0.112278	1.90259	0.0570944	0.385445	Ttc9b
ENSMUSG00000007950	ENSMUSG00000007950.9	4875.28	0.194505	0.0766154	2.53872	0.0111257	0.163343	Abhd8
ENSMUSG00000007987	ENSMUSG00000007987.12	1100.11	0.0793486	0.103037	0.770096	0.441243	0.821462	Ift22
ENSMUSG00000007989	ENSMUSG00000007989.6	858.776	0.114652	0.106344	1.07813	0.280976	0.721619	Fzd3
ENSMUSG00000008035	ENSMUSG00000008035.12	2432.23	0.32721	0.081688	4.00561	6.19e-05	0.00566345	Mid1ip1
ENSMUSG00000008036	ENSMUSG00000008036.11	5215.21	0.149161	0.121073	1.23199	0.217953	0.668667	Ap2s1
ENSMUSG00000008129	ENSMUSG00000008129.14	68.0573	-0.280286	0.143109	-1.95854	0.0501665	0.362278	4930432K21Rik
ENSMUSG00000008136	ENSMUSG00000008136.14	42.4106	-0.0504119	0.14384	-0.350472	0.725984	0.938271	Fhl2
ENSMUSG00000008140	ENSMUSG00000008140.17	5994.23	-0.0216318	0.075823	-0.285293	0.77542	0.950136	Emc10
ENSMUSG00000008153	ENSMUSG00000008153.11	1659.66	0.134257	0.0741561	1.81046	0.0702245	0.42398	Clstn3
ENSMUSG00000008167	ENSMUSG00000008167.14	661.586	0.000841098	0.100623	0.00835891	0.993331	0.998539	Fbxw9
ENSMUSG00000008200	ENSMUSG00000008200.14	2175.22	-0.0179278	0.12373	-0.144895	0.884794	0.977581	Fnbp4
ENSMUSG00000008206	ENSMUSG00000008206.16	75.9672	-0.217516	0.146007	-1.48976	0.136287	0.562789	Cers4
ENSMUSG00000008226	ENSMUSG00000008226.14	817.325	-0.191236	0.0985642	-1.94021	0.0523538	0.37086	Scrn3
ENSMUSG00000008301	ENSMUSG00000008301.11	1276.44	0.0905298	0.0858576	1.05442	0.291692	0.731528	Phax
ENSMUSG00000008305	ENSMUSG00000008305.18	2819.8	-0.0954366	0.0981908	-0.97195	0.331075	0.757395	Tle1
ENSMUSG00000008307	ENSMUSG00000008307.11	36.6576	-0.085702	0.145138	-0.590486	0.554865	0.881825	1700109H08Rik
ENSMUSG00000008318	ENSMUSG00000008318.10	712.536	0.194653	0.100813	1.93083	0.0535042	0.37491	Relt
ENSMUSG00000008333	ENSMUSG00000008333.12	1093.65	0.0300557	0.0688952	0.436252	0.662654	0.924603	Snrpb2
ENSMUSG00000008348	ENSMUSG00000008348.9	33285.8	0.0398039	0.0929687	0.428143	0.668547	0.925067	Ubc
ENSMUSG00000008373	ENSMUSG00000008373.16	1561.38	0.161512	0.0908427	1.77793	0.0754161	0.436401	Prpf31
ENSMUSG00000008384	ENSMUSG00000008384.8	477.684	-0.0150799	0.126656	-0.119062	0.905226	0.982338	Sertad1
ENSMUSG00000008393	ENSMUSG00000008393.8	5339.1	0.083026	0.0733448	1.132	0.257636	0.702747	Carhsp1
ENSMUSG00000008398	ENSMUSG00000008398.14	1137.73	-0.0256237	0.0974095	-0.263051	0.792511	0.954971	Elk3
ENSMUSG00000008429	ENSMUSG00000008429.8	1268.45	0.0694335	0.0772538	0.898771	0.368774	0.784563	Herpud2
ENSMUSG00000008435	ENSMUSG00000008435.15	996.821	0.0111294	0.114637	0.0970835	0.92266	0.985705	Rdh13
ENSMUSG00000008450	ENSMUSG00000008450.8	1692.27	0.172456	0.0855854	2.01502	0.043903	0.337833	Nutf2
ENSMUSG00000008461	ENSMUSG00000008461.6	365.481	-0.028658	0.112533	-0.254664	0.798983	0.956481	Fut1
ENSMUSG00000008475	ENSMUSG00000008475.13	5842.07	0.264301	0.0960628	2.75133	0.00593533	0.114461	Arpc5
ENSMUSG00000008489	ENSMUSG00000008489.18	593.984	-0.0425229	0.100206	-0.424353	0.671308	0.926357	Elavl2
ENSMUSG00000008496	ENSMUSG00000008496.19	117.832	-0.144076	0.141487	-1.0183	0.308536	0.743099	Pou2f2
ENSMUSG00000008575	ENSMUSG00000008575.17	303.002	-0.0294241	0.145127	-0.202747	0.839332	0.965937	Nfib
ENSMUSG00000008601	ENSMUSG00000008601.12	2218.05	0.168025	0.0908504	1.84947	0.0643906	0.408888	Rab25
ENSMUSG00000008604	ENSMUSG00000008604.11	2463.97	0.106405	0.0865724	1.22909	0.21904	0.669212	Ubqln4
ENSMUSG00000008658	ENSMUSG00000008658.15	210.393	-0.0687398	0.140885	-0.487914	0.625611	0.908394	Rbfox1
ENSMUSG00000008668	ENSMUSG00000008668.14	11506.9	0.163925	0.101566	1.61398	0.106532	0.506408	Rps18
ENSMUSG00000008682	ENSMUSG00000008682.13	5015.12	0.180216	0.103506	1.74112	0.0816627	0.451665	Rpl10
ENSMUSG00000008683	ENSMUSG00000008683.16	6723.97	0.108179	0.113664	0.951747	0.341226	0.763898	Rps15a
ENSMUSG00000008690	ENSMUSG00000008690.15	6900.18	0.0583038	0.0732357	0.796112	0.425967	0.81459	Ncaph2
ENSMUSG00000008730	ENSMUSG00000008730.17	2261.5	0.016063	0.106857	0.150322	0.880511	0.97663	Hipk1
ENSMUSG00000008734	ENSMUSG00000008734.9	475.852	-0.132316	0.134323	-0.985059	0.324595	0.754061	Gprc5b
ENSMUSG00000008763	ENSMUSG00000008763.16	2401.64	0.0786122	0.0880692	0.892619	0.372061	0.7863	Man1a2
ENSMUSG00000008822	ENSMUSG00000008822.15	704.594	0.124681	0.0986502	1.26387	0.206278	0.653818	Acyp1
ENSMUSG00000008855	ENSMUSG00000008855.17	1333.13	-0.305539	0.11829	-2.58297	0.00979534	0.151369	Hdac5
ENSMUSG00000008859	ENSMUSG00000008859.7	2051.27	0.144448	0.0828683	1.7431	0.0813153	0.450985	Rala
ENSMUSG00000008892	ENSMUSG00000008892.12	5239.83	0.0920289	0.0760966	1.20937	0.226521	0.675764	Vdac3
ENSMUSG00000008958	ENSMUSG00000008958.14	1391.31	0.0265096	0.0716578	0.369947	0.711422	0.935647	Vps72
ENSMUSG00000008976	ENSMUSG00000008976.16	1620.41	-0.067447	0.118866	-0.567422	0.570428	0.888936	Gabpa
ENSMUSG00000008999	ENSMUSG00000008999.7	37.7024	-0.127062	0.145839	-0.87125	0.383617	0.790739	Bmp7
ENSMUSG00000009013	ENSMUSG00000009013.5	5399.35	0.144626	0.111288	1.29956	0.193752	0.639447	Dynll1
ENSMUSG00000009030	ENSMUSG00000009030.14	798.347	0.131046	0.109594	1.19575	0.231796	0.681648	Pdcl
ENSMUSG00000009035	ENSMUSG00000009035.13	2777.3	-0.0424088	0.101771	-0.416708	0.676892	0.927788	Tmem184b
ENSMUSG00000009073	ENSMUSG00000009073.16	3733.84	-0.00258011	0.0807655	-0.0319457	0.974515	0.996035	Nf2
ENSMUSG00000009076	ENSMUSG00000009076.10	381.492	0.0661743	0.119278	0.554789	0.579039	0.892427	Zmat5
ENSMUSG00000009079	ENSMUSG00000009079.16	9512.92	0.0419922	0.0578121	0.726356	0.46762	0.838455	Ewsr1
ENSMUSG00000009090	ENSMUSG00000009090.17	5023.07	0.165647	0.0859068	1.92822	0.0538283	0.37568	Ap1b1
ENSMUSG00000009092	ENSMUSG00000009092.4	212.398	-0.148217	0.136897	-1.08269	0.278947	0.720991	Derl3
ENSMUSG00000009108	ENSMUSG00000009108.15	162.86	-0.286758	0.134093	-2.13851	0.0324755	0.289526	Gnat2
ENSMUSG00000009112	ENSMUSG00000009112.4	2302.95	-0.239347	0.0856488	-2.79452	0.00519771	0.106118	Bcl2l13
ENSMUSG00000009145	ENSMUSG00000009145.6	60.0377	-0.188236	0.144802	-1.29996	0.193616	0.639447	Dqx1
ENSMUSG00000009207	ENSMUSG00000009207.15	719.956	0.148586	0.114362	1.29926	0.193855	0.639447	Lnpk
ENSMUSG00000009216	ENSMUSG00000009216.7	42.0369	-0.00327899	0.142662	-0.0229842	0.981663	0.997345	Fam163b
ENSMUSG00000009246	ENSMUSG00000009246.14	3118.72	0.0986222	0.0965147	1.02184	0.306858	0.743081	Trpm5
ENSMUSG00000009291	ENSMUSG00000009291.12	3075.03	0.115131	0.0583812	1.97206	0.0486029	0.355952	Pttg1ip
ENSMUSG00000009293	ENSMUSG00000009293.17	1588.24	-0.063102	0.0814194	-0.775024	0.438325	0.819745	Ube2g2
ENSMUSG00000009378	ENSMUSG00000009378.3	3870.64	0.0335597	0.115614	0.290273	0.771608	0.949297	Slc16a12
ENSMUSG00000009394	ENSMUSG00000009394.13	1426.21	0.0695076	0.0917528	0.757553	0.448718	0.825037	Syn2
ENSMUSG00000009406	ENSMUSG00000009406.13	836.29	0.0307545	0.0799303	0.384766	0.70041	0.933997	Elk1
ENSMUSG00000009418	ENSMUSG00000009418.15	3030.21	0.0774112	0.114404	0.676648	0.498629	0.854162	Nav1
ENSMUSG00000009470	ENSMUSG00000009470.16	6225.34	0.101881	0.11288	0.902558	0.366761	0.783263	Tnpo1
ENSMUSG00000009535	ENSMUSG00000009535.13	1169.9	0.006459	0.104387	0.0618754	0.950662	0.991534	Rnmt
ENSMUSG00000009545	ENSMUSG00000009545.14	37.8497	-0.486266	0.145523	-3.34151	0.000833228	0.0330934	Kcnq1
ENSMUSG00000009549	ENSMUSG00000009549.14	2961.16	0.03263	0.115092	0.283512	0.776784	0.950382	Srp14
ENSMUSG00000009555	ENSMUSG00000009555.16	1826.04	-0.0383382	0.0763075	-0.502417	0.615374	0.906204	Cdk9
ENSMUSG00000009563	ENSMUSG00000009563.16	1725.61	-0.47076	0.106729	-4.41081	1.03e-05	0.00154954	Tor2a
ENSMUSG00000009566	ENSMUSG00000009566.12	733.837	-0.0159231	0.0943405	-0.168783	0.865967	0.974359	Fpgs
ENSMUSG00000009569	ENSMUSG00000009569.14	1210	0.0500936	0.0790685	0.633547	0.526376	0.868304	Mkl2
ENSMUSG00000009575	ENSMUSG00000009575.14	8763.95	0.181747	0.0759594	2.39269	0.0167254	0.202691	Cbx5
ENSMUSG00000009585	ENSMUSG00000009585.17	1361.05	-0.0613952	0.113195	-0.542382	0.587555	0.894311	Apobec3
ENSMUSG00000009621	ENSMUSG00000009621.18	1040.55	-0.00177948	0.100926	-0.0176316	0.985933	0.997877	Vav2
ENSMUSG00000009628	ENSMUSG00000009628.14	473.761	-0.00823423	0.1311	-0.0628089	0.949919	0.991323	Tex15
ENSMUSG00000009630	ENSMUSG00000009630.10	2723.42	0.040132	0.092901	0.431986	0.665751	0.925067	Ppp2cb
ENSMUSG00000009640	ENSMUSG00000009640.11	858.068	0.136465	0.110816	1.23145	0.218156	0.668743	Dmap1
ENSMUSG00000009647	ENSMUSG00000009647.13	617.234	0.097912	0.0959902	1.02002	0.307718	0.743099	Mcu
ENSMUSG00000009681	ENSMUSG00000009681.9	3631.23	0.0824717	0.0787125	1.04776	0.29475	0.733828	Bcr
ENSMUSG00000009687	ENSMUSG00000009687.14	91.675	-0.254015	0.144655	-1.756	0.0790882	0.445187	Fxyd5
ENSMUSG00000009731	ENSMUSG00000009731.4	670.846	0.00964927	0.141748	0.0680734	0.945727	0.989708	Kcnd1
ENSMUSG00000009733	ENSMUSG00000009733.8	315.569	-0.0303865	0.102771	-0.295671	0.767481	0.948583	Tfcp2
ENSMUSG00000009739	ENSMUSG00000009739.16	198.275	-0.451408	0.14087	-3.20444	0.00135327	0.0440126	Pou6f1
ENSMUSG00000009741	ENSMUSG00000009741.15	2308.48	-0.0614967	0.0789086	-0.779341	0.435779	0.818229	Ubp1
ENSMUSG00000009772	ENSMUSG00000009772.15	1227.02	-0.223703	0.100333	-2.22961	0.0257735	0.256884	Nuak2
ENSMUSG00000009828	ENSMUSG00000009828.15	467.46	-0.0358024	0.0862337	-0.415178	0.678011	0.928584	Ick
ENSMUSG00000009863	ENSMUSG00000009863.14	3927.74	0.197879	0.0963529	2.05369	0.0400052	0.324879	Sdhb
ENSMUSG00000009894	ENSMUSG00000009894.15	3565.25	0.168982	0.0797357	2.11927	0.0340674	0.298023	Snap47
ENSMUSG00000009905	ENSMUSG00000009905.5	511.039	-0.0835666	0.13167	-0.634668	0.525645	0.868304	Kdsr
ENSMUSG00000009907	ENSMUSG00000009907.17	2551.48	-0.351381	0.112501	-3.12336	0.00178799	0.0527595	Vps4b
ENSMUSG00000009927	ENSMUSG00000009927.9	10311.4	0.174778	0.110444	1.5825	0.113536	0.519695	Rps25
ENSMUSG00000009995	ENSMUSG00000009995.17	1071.19	-0.184135	0.0780494	-2.35921	0.0183137	0.213188	Taz
ENSMUSG00000010021	ENSMUSG00000010021.13	744.299	-0.168719	0.088794	-1.90012	0.057418	0.386458	Kif19a
ENSMUSG00000010025	ENSMUSG00000010025.19	2033.67	0.0743567	0.0894053	0.831681	0.405589	0.80178	Aldh3a2
ENSMUSG00000010045	ENSMUSG00000010045.2	1301.82	-0.0433647	0.0789326	-0.549389	0.582738	0.892926	Tmem115
ENSMUSG00000010047	ENSMUSG00000010047.12	659.348	0.0144834	0.0792853	0.182675	0.855053	0.970905	Hyal2
ENSMUSG00000010048	ENSMUSG00000010048.10	676.884	0.00530215	0.111747	0.0474478	0.962156	0.994289	Ifrd2
ENSMUSG00000010051	ENSMUSG00000010051.15	44.4731	-0.105854	0.145247	-0.728785	0.466133	0.836799	Hyal1
ENSMUSG00000010054	ENSMUSG00000010054.4	1090.38	0.0739076	0.105078	0.703358	0.481833	0.846451	Tusc2
ENSMUSG00000010057	ENSMUSG00000010057.8	1176.93	0.129325	0.0771683	1.67588	0.093762	0.480382	Nprl2
ENSMUSG00000010067	ENSMUSG00000010067.13	857.287	-0.0406362	0.130384	-0.311666	0.755295	0.94451	Rassf1
ENSMUSG00000010086	ENSMUSG00000010086.17	1853.17	-0.109567	0.11656	-0.939998	0.347219	0.768756	Rnf112
ENSMUSG00000010095	ENSMUSG00000010095.13	8441.6	0.0922379	0.0823735	1.11975	0.262819	0.70601	Slc3a2
ENSMUSG00000010097	ENSMUSG00000010097.13	5173.05	0.0562592	0.114495	0.49137	0.623165	0.907988	Nxf1
ENSMUSG00000010110	ENSMUSG00000010110.17	3223.88	-0.0016588	0.0875158	-0.0189543	0.984878	0.997439	Stx5a
ENSMUSG00000010154	ENSMUSG00000010154.7	619.652	-0.0217468	0.106337	-0.204508	0.837957	0.965548	Spire2
ENSMUSG00000010175	ENSMUSG00000010175.13	360.373	-0.000363727	0.122532	-0.00296842	0.997632	0.998981	Prox1
ENSMUSG00000010205	ENSMUSG00000010205.11	6148.18	0.0180197	0.0693703	0.259761	0.795048	0.955451	Raver1
ENSMUSG00000010277	ENSMUSG00000010277.7	7606.7	-0.0214622	0.0543746	-0.39471	0.693057	0.932283	2610507B11Rik
ENSMUSG00000010290	ENSMUSG00000010290.7	663.111	-0.0369083	0.0872293	-0.423118	0.672209	0.926714	AI597479
ENSMUSG00000010307	ENSMUSG00000010307.7	875.213	-0.127148	0.139639	-0.910542	0.362537	0.780559	Tmem86a
ENSMUSG00000010358	ENSMUSG00000010358.13	684.995	0.141511	0.115802	1.222	0.221706	0.672097	Ifi35
ENSMUSG00000010362	ENSMUSG00000010362.9	156.1	-0.0444686	0.143941	-0.308937	0.757369	0.945152	Rdm1
ENSMUSG00000010376	ENSMUSG00000010376.14	3803.19	0.138701	0.116772	1.1878	0.234913	0.68322	Nedd8
ENSMUSG00000010392	ENSMUSG00000010392.8	1988.49	0.0343481	0.0715742	0.479895	0.631302	0.911457	Gosr1
ENSMUSG00000010406	ENSMUSG00000010406.11	917.927	0.13327	0.122766	1.08556	0.277674	0.719454	Mrpl52
ENSMUSG00000010453	ENSMUSG00000010453.12	1999.17	0.036509	0.0997504	0.366003	0.714363	0.935647	Kansl3
ENSMUSG00000010476	ENSMUSG00000010476.14	704.618	-0.152355	0.111134	-1.37092	0.170401	0.611543	Ebf3
ENSMUSG00000010492	ENSMUSG00000010492.10	101.008	0.281201	0.140647	1.99935	0.045571	0.34404	Uckl1os
ENSMUSG00000010505	ENSMUSG00000010505.15	2279.09	-0.241643	0.100834	-2.39644	0.0165553	0.202349	Myt1
ENSMUSG00000010517	ENSMUSG00000010517.7	3981.63	0.18575	0.0662837	2.80234	0.00507328	0.104652	Faf1
ENSMUSG00000010538	ENSMUSG00000010538.14	52.7229	0.0713889	0.138392	0.515845	0.605963	0.902496	Tsacc
ENSMUSG00000010554	ENSMUSG00000010554.14	1236.93	0.259441	0.0924758	2.80551	0.00502376	0.103951	Mettl16
ENSMUSG00000010607	ENSMUSG00000010607.8	719.641	0.0716109	0.125374	0.571181	0.567877	0.888146	Pigyl
ENSMUSG00000010608	ENSMUSG00000010608.15	3187.69	0.0225567	0.100745	0.2239	0.822835	0.961437	Rbm25
ENSMUSG00000010609	ENSMUSG00000010609.15	877.115	0.0503364	0.10224	0.492338	0.622481	0.907988	Psen2
ENSMUSG00000010663	ENSMUSG00000010663.4	10607.8	0.15247	0.136264	1.11893	0.263168	0.706508	Fads1
ENSMUSG00000010721	ENSMUSG00000010721.15	528.803	0.00976045	0.0875534	0.11148	0.911236	0.983805	Lmbr1
ENSMUSG00000010751	ENSMUSG00000010751.15	567.664	0.0494467	0.095616	0.517138	0.60506	0.902056	Tnfrsf22
ENSMUSG00000010755	ENSMUSG00000010755.17	3207.26	0.222245	0.140143	1.58585	0.112774	0.518563	Cars
ENSMUSG00000010830	ENSMUSG00000010830.7	402.554	0.00409463	0.124642	0.032851	0.973793	0.995862	Kdelr3
ENSMUSG00000010911	ENSMUSG00000010911.12	678.294	0.0826863	0.121393	0.681148	0.495778	0.853814	Apip
ENSMUSG00000010914	ENSMUSG00000010914.10	866.524	0.158724	0.0830629	1.91089	0.0560184	0.382862	Pdhx
ENSMUSG00000010936	ENSMUSG00000010936.11	2170.23	-0.018581	0.118732	-0.156495	0.875643	0.97593	Vac14
ENSMUSG00000011034	ENSMUSG00000011034.6	95.5417	-0.536383	0.142565	-3.76237	0.00016831	0.011657	Slc5a1
ENSMUSG00000011096	ENSMUSG00000011096.17	2357.29	0.214814	0.10268	2.09206	0.0364331	0.308423	Akt1s1
ENSMUSG00000011114	ENSMUSG00000011114.18	5681	0.131572	0.0759199	1.73304	0.0830886	0.455218	Tbrg1
ENSMUSG00000011148	ENSMUSG00000011148.13	320.279	0.00824979	0.140643	0.0586577	0.953225	0.992357	Adssl1
ENSMUSG00000011158	ENSMUSG00000011158.7	1430.39	0.107643	0.0835095	1.28899	0.1974	0.644399	Brf1
ENSMUSG00000011171	ENSMUSG00000011171.11	650.723	0.292879	0.0890218	3.28997	0.00100198	0.0365943	Vipr2
ENSMUSG00000011179	ENSMUSG00000011179.7	10669.2	-0.0153433	0.10592	-0.144857	0.884823	0.977581	Odc1
ENSMUSG00000011254	ENSMUSG00000011254.16	214.466	-0.114957	0.11714	-0.981369	0.326411	0.754362	Thg1l
ENSMUSG00000011257	ENSMUSG00000011257.19	3030.66	0.127129	0.104046	1.22186	0.221762	0.672097	Pabpc4
ENSMUSG00000011267	ENSMUSG00000011267.8	82.2069	-0.055949	0.125585	-0.445507	0.655953	0.920732	Zfp296
ENSMUSG00000011306	ENSMUSG00000011306.7	1996.4	0.0160327	0.0774013	0.207137	0.835903	0.965089	Sugp1
ENSMUSG00000011382	ENSMUSG00000011382.8	206.454	-0.0590976	0.110482	-0.534909	0.592713	0.895885	Dhdh
ENSMUSG00000011427	ENSMUSG00000011427.16	347.844	0.106042	0.0997982	1.06257	0.287979	0.728366	Zfp790
ENSMUSG00000011589	ENSMUSG00000011589.8	785.154	0.314096	0.0851174	3.69015	0.000224123	0.0137424	Fsd1
ENSMUSG00000011658	ENSMUSG00000011658.15	555.844	0.0778831	0.134583	0.578698	0.562793	0.885086	Fuz
ENSMUSG00000011751	ENSMUSG00000011751.16	2140.69	-0.194585	0.0765367	-2.54238	0.0110101	0.162801	Sptbn4
ENSMUSG00000011752	ENSMUSG00000011752.6	37778	0.0285376	0.145775	0.195765	0.844794	0.967714	Pgam1
ENSMUSG00000011831	ENSMUSG00000011831.16	1150	-0.0131372	0.115001	-0.114235	0.909051	0.983034	Evi5
ENSMUSG00000011832	ENSMUSG00000011832.15	928.644	0.145223	0.117065	1.24054	0.214777	0.665643	Evi5l
ENSMUSG00000011837	ENSMUSG00000011837.4	1269.52	0.113669	0.091241	1.24581	0.212834	0.662162	Snapc2
ENSMUSG00000011877	ENSMUSG00000011877.13	3748.42	0.0375467	0.0876516	0.428363	0.668387	0.925067	Git1
ENSMUSG00000011884	ENSMUSG00000011884.13	2904.18	-0.140727	0.0717103	-1.96244	0.0497117	0.36016	Gltp
ENSMUSG00000011958	ENSMUSG00000011958.17	505.557	-0.10835	0.102546	-1.0566	0.290693	0.730515	Bnip2
ENSMUSG00000011960	ENSMUSG00000011960.12	1346.1	0.110701	0.0708694	1.56204	0.118279	0.528824	Ccnt1
ENSMUSG00000012017	ENSMUSG00000012017.3	320.64	-0.0259267	0.131411	-0.197295	0.843597	0.967429	Scarf2
ENSMUSG00000012076	ENSMUSG00000012076.7	1307.8	0.0883969	0.0786013	1.12462	0.260748	0.704284	Brms1l
ENSMUSG00000012114	ENSMUSG00000012114.16	1833.93	-0.0350705	0.074644	-0.469837	0.638472	0.913202	Med15
ENSMUSG00000012117	ENSMUSG00000012117.13	3371.5	0.0627541	0.0731968	0.857333	0.391261	0.794949	Dhdds
ENSMUSG00000012123	ENSMUSG00000012123.15	96.2585	-0.0175663	0.130821	-0.134278	0.893183	0.979424	Crybg2
ENSMUSG00000012126	ENSMUSG00000012126.16	114.015	0.0551019	0.140589	0.391938	0.695104	0.933115	Ubxn11
ENSMUSG00000012296	ENSMUSG00000012296.15	1077.32	-0.0644887	0.0759947	-0.848595	0.396107	0.797159	Tjap1
ENSMUSG00000012350	ENSMUSG00000012350.15	54.8785	-0.156078	0.144978	-1.07657	0.281674	0.722397	Ehf
ENSMUSG00000012405	ENSMUSG00000012405.15	11777.3	0.116795	0.103902	1.12409	0.260976	0.70448	Rpl15
ENSMUSG00000012422	ENSMUSG00000012422.14	2545.2	0.0386427	0.0638616	0.605101	0.545112	0.875467	Tmem167
ENSMUSG00000012429	ENSMUSG00000012429.8	721.003	-0.033344	0.0813936	-0.409663	0.682053	0.929953	Mplkip
ENSMUSG00000012443	ENSMUSG00000012443.3	2626.67	0.0708307	0.0939456	0.753954	0.450877	0.826504	Kif11
ENSMUSG00000012483	ENSMUSG00000012483.4	1111.71	0.0573501	0.0892444	0.642618	0.520472	0.865425	Rpa3
ENSMUSG00000012519	ENSMUSG00000012519.14	1029.51	0.0790349	0.114983	0.687359	0.491856	0.852803	Mlkl
ENSMUSG00000012535	ENSMUSG00000012535.14	3209.88	0.112249	0.0564094	1.98991	0.0466011	0.348544	Tnpo3
ENSMUSG00000012609	ENSMUSG00000012609.18	877.262	-0.0257005	0.0963079	-0.266858	0.789578	0.954487	Ttll5
ENSMUSG00000012640	ENSMUSG00000012640.16	508.988	-0.115443	0.135552	-0.851653	0.394407	0.79626	Zfp715
ENSMUSG00000012819	ENSMUSG00000012819.15	1587.86	0.0314986	0.126598	0.248808	0.803509	0.957179	Cdh23
ENSMUSG00000012848	ENSMUSG00000012848.15	13294.7	0.129276	0.115546	1.11882	0.263216	0.706508	Rps5
ENSMUSG00000013033	ENSMUSG00000013033.16	5172.36	-0.0341259	0.117747	-0.289825	0.77195	0.949404	Adgrl1
ENSMUSG00000013076	ENSMUSG00000013076.16	103.983	0.110932	0.145808	0.760805	0.446773	0.824037	Amotl1
ENSMUSG00000013083	ENSMUSG00000013083.8	451.91	0.216441	0.125338	1.72686	0.084192	0.457758	2200002J24Rik
ENSMUSG00000013089	ENSMUSG00000013089.15	1206.36	0.0275942	0.140765	0.19603	0.844587	0.967714	Etv5
ENSMUSG00000013091	ENSMUSG00000013091.5	45.2495	0.233408	0.141616	1.64817	0.099317	0.491511	Tmem190
ENSMUSG00000013150	ENSMUSG00000013150.15	775.864	0.150577	0.128295	1.17368	0.240523	0.6886	Gfod2
ENSMUSG00000013155	ENSMUSG00000013155.10	1210.2	0.0821181	0.115231	0.712641	0.476068	0.843045	Enkd1
ENSMUSG00000013160	ENSMUSG00000013160.7	10136.5	0.129465	0.101112	1.2804	0.200404	0.647836	Atp6v0d1
ENSMUSG00000013236	ENSMUSG00000013236.16	4087.99	-0.214431	0.0930631	-2.30414	0.0212145	0.231563	Ptprs
ENSMUSG00000013275	ENSMUSG00000013275.9	279.127	-0.212848	0.143611	-1.48212	0.138309	0.566242	Slc41a1
ENSMUSG00000013367	ENSMUSG00000013367.5	175.564	-0.216769	0.140541	-1.54239	0.122979	0.535747	Iglon5
ENSMUSG00000013419	ENSMUSG00000013419.7	767.699	0.0825117	0.0775915	1.06341	0.287596	0.727908	Zfp651
ENSMUSG00000013465	ENSMUSG00000013465.18	2413.23	0.0578597	0.0668513	0.865499	0.386765	0.792806	Nelfb
ENSMUSG00000013495	ENSMUSG00000013495.15	790.554	-0.0413373	0.128661	-0.321289	0.747991	0.94212	Tmem175
ENSMUSG00000013539	ENSMUSG00000013539.13	342.484	0.072772	0.100338	0.725271	0.468286	0.838976	Tango2
ENSMUSG00000013593	ENSMUSG00000013593.12	18561.9	0.262029	0.118117	2.21838	0.0265288	0.259919	Ndufs2
ENSMUSG00000013611	ENSMUSG00000013611.14	78.0055	-0.082327	0.102612	-0.802314	0.422371	0.812942	Snx31
ENSMUSG00000013622	ENSMUSG00000013622.15	2411.97	-0.0690219	0.0981595	-0.70316	0.481956	0.846451	Atraid
ENSMUSG00000013629	ENSMUSG00000013629.16	6132.21	0.197574	0.11337	1.74273	0.0813815	0.451006	Cad
ENSMUSG00000013646	ENSMUSG00000013646.17	1195.82	-0.0212369	0.0649821	-0.326812	0.74381	0.940717	Sh3bp5l
ENSMUSG00000013662	ENSMUSG00000013662.5	3739.49	0.082589	0.0718748	1.14907	0.250528	0.697484	Atad1
ENSMUSG00000013663	ENSMUSG00000013663.7	6703.58	0.179599	0.0633666	2.83428	0.00459296	0.0990228	Pten
ENSMUSG00000013698	ENSMUSG00000013698.12	4997.01	0.169217	0.0994095	1.70222	0.0887138	0.469317	Pea15a
ENSMUSG00000013701	ENSMUSG00000013701.12	4038.18	0.186329	0.0709872	2.62483	0.00866919	0.141491	Timm23
ENSMUSG00000013736	ENSMUSG00000013736.16	1320.43	0.0305001	0.0719514	0.423898	0.67164	0.926477	Trnt1
ENSMUSG00000013787	ENSMUSG00000013787.15	4723.1	-0.00631978	0.091105	-0.0693681	0.944697	0.989441	Ehmt2
ENSMUSG00000013822	ENSMUSG00000013822.7	2534.28	0.0760565	0.0906614	0.838906	0.401522	0.79975	Elof1
ENSMUSG00000013833	ENSMUSG00000013833.15	1526.29	-0.0101	0.113676	-0.088849	0.929202	0.985827	Med16
ENSMUSG00000013846	ENSMUSG00000013846.9	789.008	0.431503	0.125522	3.43768	0.000586721	0.0262298	St3gal1
ENSMUSG00000013858	ENSMUSG00000013858.14	3740.07	0.0155902	0.0882474	0.176665	0.859771	0.972503	Tmem259
ENSMUSG00000013878	ENSMUSG00000013878.18	823.793	-0.20859	0.091546	-2.27852	0.0226954	0.240111	Rnf170
ENSMUSG00000013921	ENSMUSG00000013921.15	4517.9	0.115039	0.0998744	1.15184	0.249389	0.696085	Clip3
ENSMUSG00000013973	ENSMUSG00000013973.12	1010.53	-0.0376652	0.0735243	-0.512283	0.608453	0.903796	Dedd
ENSMUSG00000013997	ENSMUSG00000013997.10	1117.73	0.0358269	0.0957446	0.374193	0.708261	0.934791	Nit1
ENSMUSG00000014030	ENSMUSG00000014030.15	604.868	0.0585958	0.138155	0.424131	0.671471	0.92646	Pax5
ENSMUSG00000014039	ENSMUSG00000014039.17	524.377	0.0801982	0.135894	0.590154	0.555087	0.88186	Prdm15
ENSMUSG00000014074	ENSMUSG00000014074.17	1342.5	0.000505052	0.0782368	0.00645542	0.994849	0.998655	Rnf168
ENSMUSG00000014075	ENSMUSG00000014075.15	211.103	0.0417683	0.136497	0.306002	0.759603	0.945578	Tctex1d2
ENSMUSG00000014077	ENSMUSG00000014077.13	2930.38	0.0583738	0.0553161	1.05528	0.291299	0.730853	Chp1
ENSMUSG00000014177	ENSMUSG00000014177.10	1296.54	0.0373153	0.0892839	0.41794	0.675991	0.927604	Tvp23b
ENSMUSG00000014195	ENSMUSG00000014195.15	2971.5	0.112198	0.0875486	1.28155	0.200002	0.647162	Dnajc7
ENSMUSG00000014198	ENSMUSG00000014198.15	44.0685	0.142979	0.12412	1.15194	0.249345	0.696085	Zfp385c
ENSMUSG00000014226	ENSMUSG00000014226.10	3014.77	0.152348	0.0717565	2.12313	0.0337432	0.295768	Cacybp
ENSMUSG00000014232	ENSMUSG00000014232.14	486.914	0.0150241	0.120365	0.124821	0.900665	0.981243	Cluap1
ENSMUSG00000014243	ENSMUSG00000014243.5	288.199	0.0151615	0.139947	0.108337	0.913728	0.983954	Zswim7
ENSMUSG00000014245	ENSMUSG00000014245.8	202.825	-0.0108513	0.123153	-0.0881125	0.929787	0.985827	Pigl
ENSMUSG00000014294	ENSMUSG00000014294.4	2543.05	0.119703	0.121969	0.981427	0.326382	0.754362	Ndufa2
ENSMUSG00000014301	ENSMUSG00000014301.12	542.795	0.165782	0.125843	1.31738	0.187712	0.635227	Pam16
ENSMUSG00000014303	ENSMUSG00000014303.13	872.406	0.129763	0.0725083	1.78962	0.0735146	0.431374	Glis2
ENSMUSG00000014313	ENSMUSG00000014313.14	7152.68	0.0719446	0.103502	0.695105	0.48699	0.849705	Cox6c
ENSMUSG00000014329	ENSMUSG00000014329.14	123.965	-0.169866	0.127991	-1.32717	0.184452	0.631891	Bicc1
ENSMUSG00000014349	ENSMUSG00000014349.7	4956.39	0.050043	0.0588117	0.850902	0.394824	0.796598	Ube2z
ENSMUSG00000014353	ENSMUSG00000014353.14	1326.88	0.106624	0.110559	0.964402	0.334844	0.759008	Tmem87b
ENSMUSG00000014355	ENSMUSG00000014355.10	3443	0.0155088	0.0917984	0.168944	0.865841	0.974299	Anapc1
ENSMUSG00000014402	ENSMUSG00000014402.15	4942.14	0.0504949	0.0749199	0.673985	0.500321	0.855216	Tsg101
ENSMUSG00000014418	ENSMUSG00000014418.16	844.689	-0.0136339	0.111953	-0.121782	0.903072	0.98194	Hps5
ENSMUSG00000014426	ENSMUSG00000014426.8	1086.2	0.0568286	0.0668689	0.849851	0.395408	0.796836	Map3k4
ENSMUSG00000014470	ENSMUSG00000014470.4	704.892	-0.0118603	0.101403	-0.116962	0.90689	0.982338	Rnf166
ENSMUSG00000014496	ENSMUSG00000014496.7	1090.09	0.063162	0.109593	0.576334	0.56439	0.885785	Ankrd28
ENSMUSG00000014498	ENSMUSG00000014498.9	2868.96	0.285864	0.135089	2.11612	0.0343348	0.299843	Ankrd52
ENSMUSG00000014503	ENSMUSG00000014503.14	354.123	0.149891	0.098472	1.52217	0.127966	0.547368	Pkd2l2
ENSMUSG00000014504	ENSMUSG00000014504.16	1517.89	0.111135	0.0743766	1.49422	0.135118	0.560559	Srp19
ENSMUSG00000014547	ENSMUSG00000014547.9	55.5116	0.0802767	0.142193	0.564562	0.572371	0.889939	Wdfy2
ENSMUSG00000014550	ENSMUSG00000014550.14	1379.56	-0.0503988	0.088395	-0.570154	0.568573	0.888146	Rbsn
ENSMUSG00000014551	ENSMUSG00000014551.8	792.629	0.139374	0.101619	1.37153	0.17021	0.611448	Mrps25
ENSMUSG00000014554	ENSMUSG00000014554.13	597.837	-0.00484007	0.0897004	-0.0539581	0.956969	0.992986	Dguok
ENSMUSG00000014592	ENSMUSG00000014592.20	2322.83	0.0658088	0.0843149	0.780512	0.43509	0.817936	Camta1
ENSMUSG00000014599	ENSMUSG00000014599.10	2494.61	0.0257084	0.118988	0.216059	0.828942	0.963218	Csf1
ENSMUSG00000014601	ENSMUSG00000014601.13	2175.41	0.137756	0.106745	1.29052	0.196871	0.643523	Strip1
ENSMUSG00000014602	ENSMUSG00000014602.15	964.244	0.0702213	0.127362	0.551353	0.581392	0.892861	Kif1a
ENSMUSG00000014606	ENSMUSG00000014606.14	4441.02	-0.0269186	0.0839481	-0.320658	0.74847	0.94212	Slc25a11
ENSMUSG00000014633	ENSMUSG00000014633.15	1080.68	0.0731945	0.117693	0.621911	0.534	0.871974	Cmc2
ENSMUSG00000014668	ENSMUSG00000014668.15	1460.23	-0.343507	0.0771698	-4.45132	8.53e-06	0.0014356	Chfr
ENSMUSG00000014748	ENSMUSG00000014748.13	3792.88	0.00333114	0.0859684	0.0387484	0.969091	0.995539	Tex261
ENSMUSG00000014763	ENSMUSG00000014763.7	1728.32	0.0647438	0.0647366	1.00011	0.317256	0.750019	Fam120b
ENSMUSG00000014767	ENSMUSG00000014767.16	1080.44	-0.0161324	0.0860305	-0.187519	0.851254	0.969606	Tbp
ENSMUSG00000014769	ENSMUSG00000014769.9	6050.92	0.116155	0.10404	1.11645	0.264232	0.707246	Psmb1
ENSMUSG00000014771	ENSMUSG00000014771.12	618.035	0.0335198	0.112026	0.299214	0.764777	0.947561	Pdcd2
ENSMUSG00000014773	ENSMUSG00000014773.13	821.366	0.387011	0.105621	3.66416	0.000248151	0.0150092	Dll1
ENSMUSG00000014776	ENSMUSG00000014776.7	317.085	0.316655	0.126833	2.49662	0.0125383	0.173679	Nol3
ENSMUSG00000014778	ENSMUSG00000014778.10	212.248	-0.156918	0.12341	-1.27152	0.203545	0.651686	Fhod1
ENSMUSG00000014782	ENSMUSG00000014782.16	97.9942	-0.0916942	0.146007	-0.628012	0.529996	0.869704	Plekhg4
ENSMUSG00000014786	ENSMUSG00000014786.8	954.642	0.0639602	0.107085	0.597287	0.550316	0.879282	Slc9a5
ENSMUSG00000014791	ENSMUSG00000014791.10	1751.27	-0.0618263	0.0692408	-0.892917	0.371902	0.786113	Elmo3
ENSMUSG00000014813	ENSMUSG00000014813.8	857.925	-0.34842	0.13283	-2.62304	0.00871478	0.141566	Stc1
ENSMUSG00000014837	ENSMUSG00000014837.15	1832.31	-0.0469932	0.114719	-0.409637	0.682073	0.929953	4931428F04Rik
ENSMUSG00000014846	ENSMUSG00000014846.12	924.157	0.243115	0.128372	1.89383	0.0582471	0.389684	Tppp3
ENSMUSG00000014850	ENSMUSG00000014850.15	959.056	-0.0545437	0.0680443	-0.801591	0.422789	0.812942	Msh3
ENSMUSG00000014852	ENSMUSG00000014852.16	76.5014	0.0684242	0.136714	0.500492	0.616729	0.906747	Adamts13
ENSMUSG00000014856	ENSMUSG00000014856.12	2373.11	0.0353798	0.11512	0.307329	0.758593	0.945377	Tmem208
ENSMUSG00000014859	ENSMUSG00000014859.9	2297.14	-0.03078	0.0977859	-0.31477	0.752936	0.943694	E2f4
ENSMUSG00000014867	ENSMUSG00000014867.9	20664.7	0.22652	0.0602935	3.75695	0.000171998	0.0117903	Surf4
ENSMUSG00000014873	ENSMUSG00000014873.15	899.675	0.0948655	0.0877113	1.08157	0.279446	0.721123	Surf2
ENSMUSG00000014905	ENSMUSG00000014905.3	4047.01	-0.0217558	0.125589	-0.17323	0.86247	0.973203	Dnajb9
ENSMUSG00000014907	ENSMUSG00000014907.10	528.416	-0.0415859	0.140522	-0.295939	0.767277	0.948583	Naf1
ENSMUSG00000014932	ENSMUSG00000014932.15	718.936	0.0196736	0.131226	0.149922	0.880826	0.976652	Yes1
ENSMUSG00000014956	ENSMUSG00000014956.15	7932.49	0.0600873	0.101953	0.589361	0.555619	0.88219	Ppp1cb
ENSMUSG00000014959	ENSMUSG00000014959.12	7066.61	0.144918	0.0824449	1.75775	0.07879	0.445187	Gorasp2
ENSMUSG00000014980	ENSMUSG00000014980.14	1036.02	0.0355202	0.0896218	0.396335	0.691858	0.931889	Tsen15
ENSMUSG00000015002	ENSMUSG00000015002.17	3075.57	-0.0345111	0.0963641	-0.358133	0.720244	0.936468	Efr3a
ENSMUSG00000015013	ENSMUSG00000015013.9	1471.67	0.0485339	0.0993769	0.488382	0.625279	0.908194	Trappc2l
ENSMUSG00000015016	ENSMUSG00000015016.8	950.532	-0.131401	0.0799042	-1.64448	0.100078	0.493095	Acsf3
ENSMUSG00000015023	ENSMUSG00000015023.7	2939.39	0.10781	0.0951137	1.13348	0.257012	0.702333	Ddx19a
ENSMUSG00000015027	ENSMUSG00000015027.11	2342.65	-0.160695	0.124014	-1.29578	0.19505	0.640757	Galns
ENSMUSG00000015053	ENSMUSG00000015053.14	56.8529	0.147988	0.144618	1.0233	0.306167	0.742208	Gata2
ENSMUSG00000015083	ENSMUSG00000015083.11	104.77	-0.0638833	0.126285	-0.505866	0.612951	0.90509	C8g
ENSMUSG00000015085	ENSMUSG00000015085.8	67.3254	-0.208326	0.135567	-1.5367	0.124367	0.53891	Entpd2
ENSMUSG00000015087	ENSMUSG00000015087.14	4350.83	-0.166201	0.0815611	-2.03774	0.0415757	0.330996	Rabl6
ENSMUSG00000015092	ENSMUSG00000015092.9	4556.34	0.0767851	0.106498	0.721003	0.470908	0.840394	Edf1
ENSMUSG00000015093	ENSMUSG00000015093.15	43.5109	0.12547	0.145967	0.859578	0.390022	0.794806	Clic3
ENSMUSG00000015094	ENSMUSG00000015094.16	7133.72	0.00339437	0.0826174	0.0410854	0.967228	0.995086	Npdc1
ENSMUSG00000015095	ENSMUSG00000015095.12	2093.28	-0.151063	0.0693881	-2.17708	0.0294747	0.27556	Fbxw5
ENSMUSG00000015120	ENSMUSG00000015120.15	4608.93	0.0456998	0.0512779	0.891218	0.372812	0.786649	Ube2i
ENSMUSG00000015126	ENSMUSG00000015126.9	834.951	0.0815926	0.0839837	0.971529	0.331285	0.757395	Tsr3
ENSMUSG00000015127	ENSMUSG00000015127.14	275.323	0.166478	0.129511	1.28544	0.19864	0.645568	Unkl
ENSMUSG00000015143	ENSMUSG00000015143.14	2447.51	0.00300678	0.103932	0.0289303	0.97692	0.996317	Actn1
ENSMUSG00000015149	ENSMUSG00000015149.14	2636.66	-0.0653671	0.0971986	-0.672511	0.501258	0.856162	Sirt2
ENSMUSG00000015165	ENSMUSG00000015165.16	8644.57	0.00998261	0.0453248	0.220246	0.82568	0.962521	Hnrnpl
ENSMUSG00000015176	ENSMUSG00000015176.9	3216.36	0.105812	0.0839462	1.26047	0.207499	0.655474	Nolc1
ENSMUSG00000015189	ENSMUSG00000015189.12	1432.86	-0.031073	0.105956	-0.293263	0.769321	0.949297	Casd1
ENSMUSG00000015202	ENSMUSG00000015202.13	435.046	-0.171095	0.0775078	-2.20746	0.0272823	0.263587	Cnksr3
ENSMUSG00000015214	ENSMUSG00000015214.14	1243.07	0.0260879	0.102262	0.255109	0.798639	0.956402	Mtmr1
ENSMUSG00000015217	ENSMUSG00000015217.11	1277.29	-0.141952	0.0785884	-1.80627	0.0708758	0.425044	Hmgb3
ENSMUSG00000015222	ENSMUSG00000015222.17	7692.38	0.182475	0.114359	1.59563	0.110571	0.514156	Map2
ENSMUSG00000015243	ENSMUSG00000015243.4	209.62	-0.14645	0.143446	-1.02094	0.307282	0.743099	Abca1
ENSMUSG00000015247	ENSMUSG00000015247.10	926.926	0.0285308	0.0719643	0.396457	0.691768	0.931889	Nipsnap3b
ENSMUSG00000015289	ENSMUSG00000015289.4	837.144	0.100097	0.13099	0.764154	0.444775	0.823581	Lage3
ENSMUSG00000015290	ENSMUSG00000015290.15	2561.02	-0.137187	0.0665387	-2.06176	0.0392306	0.321553	Ubl4a
ENSMUSG00000015291	ENSMUSG00000015291.10	15193	0.114039	0.095284	1.19683	0.231371	0.68123	Gdi1
ENSMUSG00000015312	ENSMUSG00000015312.8	301.266	-0.0990869	0.128869	-0.768894	0.441956	0.822001	Gadd45b
ENSMUSG00000015335	ENSMUSG00000015335.16	878.851	0.0558662	0.100936	0.553484	0.579932	0.892779	Zdhhc12
ENSMUSG00000015337	ENSMUSG00000015337.5	503.618	0.0198108	0.128971	0.153607	0.87792	0.976224	Endog
ENSMUSG00000015341	ENSMUSG00000015341.17	2180.54	0.283751	0.0837591	3.38771	0.0007048	0.029626	Golga7
ENSMUSG00000015342	ENSMUSG00000015342.6	468.891	-0.191007	0.106153	-1.79934	0.0719644	0.428676	Xk
ENSMUSG00000015354	ENSMUSG00000015354.8	4276.36	0.0216599	0.112235	0.192987	0.846969	0.968351	Pcolce2
ENSMUSG00000015357	ENSMUSG00000015357.10	1583.5	-0.0462613	0.0787542	-0.587414	0.556926	0.882863	Clpx
ENSMUSG00000015363	ENSMUSG00000015363.13	3643.21	-0.205911	0.112468	-1.83084	0.0671243	0.416339	Trabd
ENSMUSG00000015377	ENSMUSG00000015377.9	476.43	-0.00139474	0.10898	-0.0127981	0.989789	0.998539	Dennd6b
ENSMUSG00000015401	ENSMUSG00000015401.12	7412.05	0.10225	0.129014	0.792545	0.428043	0.815002	Tmem27
ENSMUSG00000015452	ENSMUSG00000015452.14	44.855	-0.068331	0.144248	-0.473703	0.635711	0.912525	Ager
ENSMUSG00000015461	ENSMUSG00000015461.15	3191.33	0.177854	0.0655126	2.7148	0.00663154	0.122436	Atf6b
ENSMUSG00000015468	ENSMUSG00000015468.14	50.0374	-0.258968	0.144607	-1.79084	0.0733197	0.431177	Notch4
ENSMUSG00000015474	ENSMUSG00000015474.16	1150.6	-0.534682	0.103136	-5.18422	2.17e-07	9.35e-05	Ppt2
ENSMUSG00000015476	ENSMUSG00000015476.6	1313.31	0.283928	0.0737893	3.84782	0.000119176	0.00926176	Prrt1
ENSMUSG00000015478	ENSMUSG00000015478.13	2527.53	0.193151	0.0740964	2.60676	0.00914039	0.145973	Rnf5
ENSMUSG00000015488	ENSMUSG00000015488.14	2420.03	-0.0148762	0.0718117	-0.207155	0.835889	0.965089	Cacfd1
ENSMUSG00000015501	ENSMUSG00000015501.10	1315.28	-0.140195	0.0976344	-1.43592	0.151025	0.585145	Hivep2
ENSMUSG00000015522	ENSMUSG00000015522.18	1517.39	-0.128592	0.0886489	-1.45057	0.146898	0.578377	Arnt
ENSMUSG00000015536	ENSMUSG00000015536.14	1371.89	0.175863	0.125579	1.40041	0.16139	0.600918	Mocs2
ENSMUSG00000015542	ENSMUSG00000015542.17	449.026	0.0791076	0.131292	0.602533	0.546819	0.876524	Nat9
ENSMUSG00000015568	ENSMUSG00000015568.16	2604.31	0.164011	0.142822	1.14835	0.250823	0.69752	Lpl
ENSMUSG00000015575	ENSMUSG00000015575.14	6574.99	-0.0324484	0.101543	-0.319552	0.749308	0.942352	Atp6v0e
ENSMUSG00000015597	ENSMUSG00000015597.16	1122.96	-0.0781235	0.114184	-0.684191	0.493855	0.852903	Zfp318
ENSMUSG00000015599	ENSMUSG00000015599.8	1048.61	0.134885	0.113778	1.18551	0.235815	0.684574	Ttbk1
ENSMUSG00000015605	ENSMUSG00000015605.5	1245.35	-0.0328393	0.094446	-0.347704	0.728063	0.938587	Srf
ENSMUSG00000015647	ENSMUSG00000015647.9	767.496	-0.335281	0.119498	-2.80574	0.00502018	0.103951	Lama5
ENSMUSG00000015652	ENSMUSG00000015652.9	39.7741	-0.0254734	0.145893	-0.174603	0.861392	0.972861	Steap1
ENSMUSG00000015653	ENSMUSG00000015653.13	192.338	0.00387738	0.120854	0.0320832	0.974406	0.996035	Steap2
ENSMUSG00000015656	ENSMUSG00000015656.17	85538.3	0.129732	0.0702826	1.84586	0.064912	0.410833	Hspa8
ENSMUSG00000015659	ENSMUSG00000015659.12	232.49	-0.00569304	0.131833	-0.0431837	0.965555	0.994842	Serac1
ENSMUSG00000015668	ENSMUSG00000015668.13	2212.56	0.110861	0.0986734	1.12352	0.261218	0.70474	Pdzd11
ENSMUSG00000015671	ENSMUSG00000015671.10	4302.34	0.114809	0.0872114	1.31645	0.188024	0.635585	Psma2
ENSMUSG00000015672	ENSMUSG00000015672.3	829.322	0.0948286	0.100994	0.938948	0.347757	0.76936	Mrpl32
ENSMUSG00000015697	ENSMUSG00000015697.14	1669.93	-0.0125042	0.0829102	-0.150817	0.88012	0.97663	Setdb1
ENSMUSG00000015709	ENSMUSG00000015709.9	355.953	-0.451768	0.121045	-3.73222	0.000189796	0.0124976	Arnt2
ENSMUSG00000015711	ENSMUSG00000015711.8	951.666	-0.00183836	0.113098	-0.0162546	0.987031	0.998233	Prune1
ENSMUSG00000015714	ENSMUSG00000015714.11	3347.18	-0.0974649	0.0621212	-1.56895	0.116661	0.526038	Cers2
ENSMUSG00000015733	ENSMUSG00000015733.13	3985.14	0.0281034	0.0541922	0.518588	0.604048	0.901151	Capza2
ENSMUSG00000015745	ENSMUSG00000015745.9	187.48	-0.26378	0.112278	-2.34935	0.0188064	0.216061	Plekho1
ENSMUSG00000015747	ENSMUSG00000015747.5	976.68	-0.030323	0.127151	-0.23848	0.811509	0.95864	Vps45
ENSMUSG00000015748	ENSMUSG00000015748.13	1570.69	0.13177	0.103258	1.27613	0.201911	0.649877	Prpf3
ENSMUSG00000015749	ENSMUSG00000015749.12	5556.6	-0.08864	0.0813964	-1.08899	0.276158	0.717892	Anp32e
ENSMUSG00000015750	ENSMUSG00000015750.15	2639.69	-0.160192	0.0656716	-2.43929	0.0147162	0.190243	Aph1a
ENSMUSG00000015755	ENSMUSG00000015755.16	3530.74	0.107097	0.0695151	1.54063	0.123406	0.536619	Tab2
ENSMUSG00000015757	ENSMUSG00000015757.10	1507.06	0.0971841	0.0591748	1.64232	0.100523	0.493641	Ppil4
ENSMUSG00000015759	ENSMUSG00000015759.10	3907.25	0.111116	0.0765922	1.45076	0.146848	0.578349	Cnih1
ENSMUSG00000015766	ENSMUSG00000015766.14	1112.11	0.1296	0.0948526	1.36633	0.171835	0.613744	Eps8
ENSMUSG00000015776	ENSMUSG00000015776.12	2289.93	0.0293456	0.0599058	0.489862	0.624232	0.908041	Med22
ENSMUSG00000015790	ENSMUSG00000015790.16	1259.41	0.0687342	0.106058	0.64808	0.516933	0.8633	Surf1
ENSMUSG00000015804	ENSMUSG00000015804.14	2916.92	0.0217461	0.0989679	0.219729	0.826083	0.962521	Med28
ENSMUSG00000015806	ENSMUSG00000015806.12	9167.04	0.0517718	0.122774	0.421682	0.673257	0.927156	Qdpr
ENSMUSG00000015829	ENSMUSG00000015829.13	601.979	-0.121615	0.136952	-0.888009	0.374536	0.787458	Tnr
ENSMUSG00000015837	ENSMUSG00000015837.15	17328.7	0.0495333	0.124084	0.399191	0.689753	0.931588	Sqstm1
ENSMUSG00000015839	ENSMUSG00000015839.6	1632.16	-0.0208912	0.0720434	-0.289981	0.771831	0.949394	Nfe2l2
ENSMUSG00000015846	ENSMUSG00000015846.14	948.359	-0.225078	0.114063	-1.97328	0.0484636	0.355376	Rxra
ENSMUSG00000015869	ENSMUSG00000015869.16	1999.18	0.152708	0.0702067	2.17512	0.0296208	0.27564	Prpsap1
ENSMUSG00000015879	ENSMUSG00000015879.8	66.8122	-0.0641758	0.13111	-0.489479	0.624503	0.908091	Fam184b
ENSMUSG00000015880	ENSMUSG00000015880.13	2346.41	-0.00131787	0.110177	-0.0119614	0.990456	0.998539	Ncapg
ENSMUSG00000015882	ENSMUSG00000015882.17	1546.87	-0.141648	0.138654	-1.02159	0.306973	0.743084	Lcorl
ENSMUSG00000015889	ENSMUSG00000015889.8	1744.49	-0.0196044	0.0767299	-0.255498	0.798338	0.956402	Lta4h
ENSMUSG00000015932	ENSMUSG00000015932.8	15127.6	-0.175618	0.0736078	-2.38586	0.0170393	0.203604	Dstn
ENSMUSG00000015937	ENSMUSG00000015937.14	6232.67	-0.0108393	0.0633549	-0.171088	0.864154	0.973828	H2afy
ENSMUSG00000015942	ENSMUSG00000015942.9	668.701	0.037081	0.106841	0.347066	0.728542	0.938587	Gtf2ird2
ENSMUSG00000015943	ENSMUSG00000015943.11	546.321	-0.0125318	0.100523	-0.124665	0.900788	0.981243	Bola1
ENSMUSG00000015944	ENSMUSG00000015944.9	7912.77	-0.0471862	0.123093	-0.383339	0.701469	0.934077	Gatsl2
ENSMUSG00000015961	ENSMUSG00000015961.8	1610.41	0.129949	0.0610779	2.12759	0.0333708	0.293466	Adss
ENSMUSG00000015968	ENSMUSG00000015968.16	573.966	-0.164454	0.116574	-1.41073	0.158323	0.59683	Cacna1d
ENSMUSG00000015971	ENSMUSG00000015971.4	1265.01	-0.209499	0.0852721	-2.45684	0.0140167	0.185007	Actr8
ENSMUSG00000015980	ENSMUSG00000015980.14	109.701	0.272534	0.134372	2.02821	0.0425388	0.333069	Lrrc27
ENSMUSG00000015994	ENSMUSG00000015994.10	1076.94	0.255755	0.0970728	2.63467	0.00842186	0.139647	Fnta
ENSMUSG00000016018	ENSMUSG00000016018.3	2724.69	0.144682	0.0635027	2.27836	0.0227051	0.240111	Skiv2l2
ENSMUSG00000016028	ENSMUSG00000016028.9	244.93	-0.259463	0.129102	-2.00974	0.0444583	0.339973	Celsr1
ENSMUSG00000016128	ENSMUSG00000016128.14	1098.77	-0.0905281	0.132159	-0.684992	0.493349	0.852803	Stard13
ENSMUSG00000016150	ENSMUSG00000016150.15	90.618	0.100266	0.145549	0.688881	0.490898	0.852126	Tenm1
ENSMUSG00000016179	ENSMUSG00000016179.11	93.3719	-0.120966	0.137951	-0.876878	0.380553	0.79028	Camk1g
ENSMUSG00000016181	ENSMUSG00000016181.9	343.046	0.255839	0.109815	2.32972	0.019821	0.222458	Diexf
ENSMUSG00000016200	ENSMUSG00000016200.14	1446.65	0.201638	0.109619	1.83945	0.0658485	0.413509	Syt14
ENSMUSG00000016239	ENSMUSG00000016239.11	220.653	-0.0811971	0.119158	-0.681426	0.495602	0.853814	Lonrf3
ENSMUSG00000016252	ENSMUSG00000016252.7	5929.85	0.159061	0.112049	1.41957	0.155733	0.594364	Atp5e
ENSMUSG00000016253	ENSMUSG00000016253.12	2262.66	0.0605032	0.098453	0.614539	0.538859	0.873794	Nelfcd
ENSMUSG00000016256	ENSMUSG00000016256.10	4860.9	-0.123109	0.104034	-1.18335	0.236671	0.685759	Ctsz
ENSMUSG00000016257	ENSMUSG00000016257.15	2922.08	0.136505	0.0561816	2.4297	0.0151113	0.192741	Prelid3b
ENSMUSG00000016262	ENSMUSG00000016262.14	239.999	-0.0414551	0.115007	-0.360457	0.718505	0.935997	Sertad4
ENSMUSG00000016308	ENSMUSG00000016308.12	1896.62	0.034607	0.0815573	0.424328	0.671327	0.926357	Ube2a
ENSMUSG00000016319	ENSMUSG00000016319.3	17108.2	0.121886	0.0846464	1.43994	0.149884	0.582981	Slc25a5
ENSMUSG00000016344	ENSMUSG00000016344.14	971.828	-0.0517249	0.127508	-0.40566	0.684992	0.931173	Ppdpf
ENSMUSG00000016346	ENSMUSG00000016346.17	1680.74	0.0737463	0.145797	0.505816	0.612986	0.90509	Kcnq2
ENSMUSG00000016349	ENSMUSG00000016349.10	47.7945	0.0134597	0.128785	0.104513	0.916762	0.984548	Eef1a2
ENSMUSG00000016356	ENSMUSG00000016356.17	1182.99	-0.125083	0.140949	-0.887438	0.374843	0.787458	Col20a1
ENSMUSG00000016382	ENSMUSG00000016382.15	1862.07	0.288944	0.0892855	3.23619	0.00121139	0.0414716	Pls3
ENSMUSG00000016409	ENSMUSG00000016409.4	611.116	0.119732	0.0996267	1.20181	0.229439	0.679572	Nkap
ENSMUSG00000016427	ENSMUSG00000016427.7	3051.57	0.0608381	0.101162	0.601394	0.547578	0.877048	Ndufa1
ENSMUSG00000016477	ENSMUSG00000016477.17	561.782	-0.312271	0.114202	-2.73438	0.00624979	0.117934	E2f3
ENSMUSG00000016481	ENSMUSG00000016481.15	636.006	-0.102705	0.112544	-0.912577	0.361465	0.779559	Cr1l
ENSMUSG00000016487	ENSMUSG00000016487.15	1398.13	-0.0865706	0.0998962	-0.866606	0.386158	0.792576	Ppfibp1
ENSMUSG00000016494	ENSMUSG00000016494.9	79.9297	-0.387485	0.142992	-2.70983	0.00673172	0.123494	Cd34
ENSMUSG00000016495	ENSMUSG00000016495.12	828.744	0.12017	0.0951966	1.26234	0.206828	0.654323	Plgrkt
ENSMUSG00000016496	ENSMUSG00000016496.7	148.821	-0.0915104	0.105868	-0.864381	0.387379	0.793286	Cd274
ENSMUSG00000016503	ENSMUSG00000016503.16	2184.4	-0.0273282	0.0956396	-0.285741	0.775076	0.950088	Gtf3a
ENSMUSG00000016510	ENSMUSG00000016510.11	576.354	-0.0458112	0.0676783	-0.676897	0.498471	0.85402	Mtif3
ENSMUSG00000016520	ENSMUSG00000016520.7	766.236	0.0795781	0.119068	0.668342	0.503915	0.856503	Lnx2
ENSMUSG00000016526	ENSMUSG00000016526.8	621.311	-0.0525562	0.0829027	-0.633951	0.526113	0.868304	Dyrk3
ENSMUSG00000016528	ENSMUSG00000016528.10	1595.97	-0.209017	0.0889928	-2.34869	0.0188393	0.216061	Mapkapk2
ENSMUSG00000016534	ENSMUSG00000016534.15	9639.28	-0.00831662	0.112153	-0.074154	0.940888	0.988134	Lamp2
ENSMUSG00000016541	ENSMUSG00000016541.9	5851.29	0.189505	0.121644	1.55787	0.119264	0.530338	Atxn10
ENSMUSG00000016552	ENSMUSG00000016552.13	1194.86	0.219459	0.0835192	2.62765	0.00859769	0.140729	Foxred2
ENSMUSG00000016554	ENSMUSG00000016554.8	5637.71	0.123388	0.0696572	1.77135	0.0765019	0.439093	Eif3d
ENSMUSG00000016559	ENSMUSG00000016559.14	13773.6	-0.132173	0.133377	-0.990971	0.3217	0.751751	H3f3b
ENSMUSG00000016619	ENSMUSG00000016619.9	4157.19	0.126897	0.0763148	1.66281	0.0963506	0.486525	Nup50
ENSMUSG00000016624	ENSMUSG00000016624.15	2704.88	-0.385456	0.13675	-2.8187	0.00482187	0.10193	Phf21b
ENSMUSG00000016637	ENSMUSG00000016637.6	1646.31	0.0615613	0.127735	0.481947	0.629844	0.911216	Ift27
ENSMUSG00000016664	ENSMUSG00000016664.14	2008.41	0.230373	0.0622666	3.69979	0.000215779	0.0133533	Pacsin2
ENSMUSG00000016756	ENSMUSG00000016756.16	299.069	0.162721	0.127008	1.28119	0.200128	0.647412	Cmah
ENSMUSG00000016757	ENSMUSG00000016757.10	1168.7	0.112862	0.0727741	1.55085	0.120937	0.533522	Ttll12
ENSMUSG00000016831	ENSMUSG00000016831.11	3036.86	0.096648	0.051257	1.88556	0.0593549	0.392679	Tox4
ENSMUSG00000016833	ENSMUSG00000016833.14	1190.21	0.211167	0.105672	1.99833	0.0456808	0.344343	Mrps18c
ENSMUSG00000016921	ENSMUSG00000016921.14	8813.3	0.0540913	0.0592341	0.913179	0.361148	0.779001	Srsf6
ENSMUSG00000016933	ENSMUSG00000016933.17	4684.36	-0.0179248	0.0961595	-0.186407	0.852125	0.9698	Plcg1
ENSMUSG00000016940	ENSMUSG00000016940.18	1059.79	0.11373	0.112368	1.01212	0.311478	0.745302	Kctd2
ENSMUSG00000016942	ENSMUSG00000016942.5	59.438	-0.345559	0.145655	-2.37245	0.0176706	0.207742	Tmprss6
ENSMUSG00000016946	ENSMUSG00000016946.5	1213.25	0.427283	0.105809	4.03825	5.39e-05	0.00510994	Kctd5
ENSMUSG00000016984	ENSMUSG00000016984.7	779.052	0.0691743	0.109284	0.632974	0.52675	0.868304	Etaa1
ENSMUSG00000017009	ENSMUSG00000017009.3	472.609	0.202653	0.13615	1.48845	0.136633	0.563112	Sdc4
ENSMUSG00000017057	ENSMUSG00000017057.9	760.006	-0.0282613	0.117696	-0.240121	0.810236	0.958353	Il13ra1
ENSMUSG00000017119	ENSMUSG00000017119.19	4960.59	-0.0022112	0.0859971	-0.0257125	0.979487	0.996602	Nbr1
ENSMUSG00000017132	ENSMUSG00000017132.17	2151.23	-0.0885815	0.0555045	-1.59593	0.110504	0.514156	Cyth1
ENSMUSG00000017144	ENSMUSG00000017144.8	293.714	-0.265129	0.138756	-1.91076	0.0560356	0.382862	Rnd3
ENSMUSG00000017146	ENSMUSG00000017146.12	1842.26	0.149614	0.097228	1.53879	0.123854	0.537869	Brca1
ENSMUSG00000017167	ENSMUSG00000017167.6	2595.88	-0.0680725	0.0986683	-0.689913	0.490249	0.851511	Cntnap1
ENSMUSG00000017176	ENSMUSG00000017176.17	1438.12	0.0832945	0.0668789	1.24545	0.212966	0.662162	Nt5c3b
ENSMUSG00000017188	ENSMUSG00000017188.3	3322.99	0.0391616	0.101529	0.385717	0.699706	0.933914	Coa3
ENSMUSG00000017204	ENSMUSG00000017204.4	3977.73	0.579569	0.121851	4.75638	1.97e-06	0.00047045	Gsdma
ENSMUSG00000017210	ENSMUSG00000017210.14	2254.04	0.130422	0.0849872	1.5346	0.124882	0.54005	Med24
ENSMUSG00000017221	ENSMUSG00000017221.14	4345.03	0.0432294	0.101296	0.426765	0.669551	0.925331	Psmd3
ENSMUSG00000017264	ENSMUSG00000017264.16	1855.84	-0.0121761	0.0775536	-0.157002	0.875243	0.97593	Exosc10
ENSMUSG00000017286	ENSMUSG00000017286.15	1169.64	0.0275314	0.103616	0.265705	0.790466	0.954487	Glod4
ENSMUSG00000017288	ENSMUSG00000017288.15	2107.78	0.224509	0.098865	2.27086	0.0231555	0.24257	Vps53
ENSMUSG00000017291	ENSMUSG00000017291.13	2042.7	0.0354678	0.0855717	0.41448	0.678523	0.928688	Taok1
ENSMUSG00000017299	ENSMUSG00000017299.13	1052.13	0.0875153	0.0703659	1.24372	0.213604	0.663392	Dnttip1
ENSMUSG00000017307	ENSMUSG00000017307.15	628.565	0.0516675	0.11344	0.455462	0.648777	0.918471	Acot8
ENSMUSG00000017314	ENSMUSG00000017314.12	3418.62	0.0454543	0.0958443	0.474251	0.635321	0.912468	Mpp2
ENSMUSG00000017376	ENSMUSG00000017376.15	1240.93	0.00897779	0.116463	0.0770872	0.938554	0.9878	Nlk
ENSMUSG00000017386	ENSMUSG00000017386.10	750.544	-0.0577387	0.096321	-0.599441	0.548879	0.878216	Traf4
ENSMUSG00000017390	ENSMUSG00000017390.15	1901.81	0.236368	0.122161	1.93488	0.0530046	0.37428	Aldoc
ENSMUSG00000017400	ENSMUSG00000017400.10	1134.7	0.41272	0.11822	3.4911	0.000481034	0.0233817	Stac2
ENSMUSG00000017404	ENSMUSG00000017404.12	20327.8	0.0837194	0.10009	0.836441	0.402907	0.799981	Rpl19
ENSMUSG00000017405	ENSMUSG00000017405.14	278.492	-0.0254902	0.133822	-0.190478	0.848934	0.968952	Nek8
ENSMUSG00000017412	ENSMUSG00000017412.15	129.386	-0.363643	0.143853	-2.52788	0.0114755	0.166009	Cacnb4
ENSMUSG00000017418	ENSMUSG00000017418.13	659.112	-0.106617	0.135982	-0.784051	0.43301	0.817148	Arl5b
ENSMUSG00000017421	ENSMUSG00000017421.18	5011.09	0.0564127	0.0755095	0.747094	0.455007	0.829558	Zfp207
ENSMUSG00000017428	ENSMUSG00000017428.16	2308.6	0.160576	0.0719423	2.23202	0.0256139	0.256431	Psmd11
ENSMUSG00000017446	ENSMUSG00000017446.14	252.595	-0.455237	0.13064	-3.48468	0.000492719	0.0236064	C1qtnf1
ENSMUSG00000017466	ENSMUSG00000017466.9	1292.82	0.0254535	0.0986993	0.257889	0.796492	0.955634	Timp2
ENSMUSG00000017478	ENSMUSG00000017478.15	2348.83	-0.0242229	0.0608586	-0.398019	0.690616	0.931679	Zc3h18
ENSMUSG00000017485	ENSMUSG00000017485.10	2081.43	-0.142387	0.101383	-1.40445	0.160185	0.598934	Top2b
ENSMUSG00000017493	ENSMUSG00000017493.12	123.265	0.0184854	0.125082	0.147787	0.882511	0.97694	Igfbp4
ENSMUSG00000017499	ENSMUSG00000017499.15	1608.03	0.227828	0.0826721	2.7558	0.00585486	0.114003	Cdc6
ENSMUSG00000017548	ENSMUSG00000017548.15	4369.86	-0.023822	0.123221	-0.193327	0.846703	0.968351	Suz12
ENSMUSG00000017550	ENSMUSG00000017550.14	1060.1	0.0432494	0.0842694	0.513227	0.607792	0.903741	Atad5
ENSMUSG00000017561	ENSMUSG00000017561.16	402.754	-0.0192665	0.0945916	-0.203681	0.838603	0.965671	Crlf3
ENSMUSG00000017615	ENSMUSG00000017615.12	2504.09	0.133325	0.0504752	2.6414	0.00825646	0.138598	Tnfaip1
ENSMUSG00000017631	ENSMUSG00000017631.18	4354.44	-0.0229609	0.0833756	-0.275392	0.783015	0.952632	Abr
ENSMUSG00000017639	ENSMUSG00000017639.13	241.414	-0.348159	0.132056	-2.63646	0.00837756	0.139285	Rab11fip4
ENSMUSG00000017652	ENSMUSG00000017652.16	116.3	-0.242664	0.140401	-1.72837	0.0839223	0.457313	Cd40
ENSMUSG00000017664	ENSMUSG00000017664.16	2269.56	0.0128527	0.0953412	0.134807	0.892764	0.979424	Slc35c2
ENSMUSG00000017667	ENSMUSG00000017667.9	644.355	0.0495186	0.0946883	0.522964	0.600999	0.89918	Zfp334
ENSMUSG00000017670	ENSMUSG00000017670.16	2322.48	0.016453	0.0618208	0.26614	0.790131	0.954487	Elmo2
ENSMUSG00000017677	ENSMUSG00000017677.11	660.207	-0.0685164	0.115764	-0.591863	0.553942	0.881179	Wsb1
ENSMUSG00000017679	ENSMUSG00000017679.16	2024.97	0.0302162	0.0829887	0.364101	0.715783	0.935733	Ttpal
ENSMUSG00000017686	ENSMUSG00000017686.16	2159.38	-0.0228363	0.0652459	-0.350004	0.726336	0.938409	Rhot1
ENSMUSG00000017688	ENSMUSG00000017688.14	47.9226	-0.257921	0.14545	-1.77327	0.0761845	0.438192	Hnf4g
ENSMUSG00000017692	ENSMUSG00000017692.8	216.576	-0.446403	0.120037	-3.71889	0.000200103	0.0127362	Rhbdl3
ENSMUSG00000017697	ENSMUSG00000017697.3	143.158	0.0388634	0.14601	0.266169	0.790109	0.954487	Ada
ENSMUSG00000017707	ENSMUSG00000017707.9	9533.66	0.0369324	0.130985	0.281958	0.777976	0.950567	Serinc3
ENSMUSG00000017713	ENSMUSG00000017713.9	210.672	-0.0558741	0.140636	-0.397296	0.691149	0.931679	Tha1
ENSMUSG00000017715	ENSMUSG00000017715.11	1392.6	0.0252941	0.0583165	0.433738	0.664479	0.924679	Pgs1
ENSMUSG00000017716	ENSMUSG00000017716.15	3405.25	0.151647	0.0961253	1.5776	0.114658	0.522191	Birc5
ENSMUSG00000017718	ENSMUSG00000017718.15	342.178	0.0806686	0.131124	0.615209	0.538417	0.873794	Afmid
ENSMUSG00000017721	ENSMUSG00000017721.15	4713.15	0.197284	0.0610273	3.23271	0.0012262	0.0417065	Pigt
ENSMUSG00000017724	ENSMUSG00000017724.14	181.647	-0.308378	0.135424	-2.27714	0.022778	0.240414	Etv4
ENSMUSG00000017734	ENSMUSG00000017734.15	338.861	0.0431369	0.119085	0.362235	0.717177	0.93599	Dbndd2
ENSMUSG00000017740	ENSMUSG00000017740.17	857.486	-0.0679532	0.127683	-0.532204	0.594585	0.896527	Slc12a5
ENSMUSG00000017747	ENSMUSG00000017747.13	875.867	0.126724	0.0725606	1.74646	0.0807303	0.44926	Ghdc
ENSMUSG00000017754	ENSMUSG00000017754.13	43.1865	0.234146	0.142007	1.64883	0.0991824	0.491242	Pltp
ENSMUSG00000017760	ENSMUSG00000017760.15	7628.48	-0.0546208	0.0892024	-0.612324	0.540324	0.873794	Ctsa
ENSMUSG00000017764	ENSMUSG00000017764.2	734.76	0.119168	0.0666752	1.78729	0.0738902	0.432314	Zswim1
ENSMUSG00000017765	ENSMUSG00000017765.17	983.389	-0.162199	0.106634	-1.52108	0.12824	0.547437	Slc12a4
ENSMUSG00000017774	ENSMUSG00000017774.19	3364.61	-0.0375941	0.0642983	-0.584682	0.558761	0.883274	Myo1c
ENSMUSG00000017776	ENSMUSG00000017776.15	3091.63	-0.012402	0.0870885	-0.142407	0.886759	0.978237	Crk
ENSMUSG00000017778	ENSMUSG00000017778.14	4599.71	0.0804754	0.107172	0.750903	0.452711	0.827496	Cox7c
ENSMUSG00000017781	ENSMUSG00000017781.17	4869.49	0.132427	0.0797168	1.66122	0.0966695	0.486525	Pitpna
ENSMUSG00000017801	ENSMUSG00000017801.15	2804.17	0.146897	0.078864	1.86267	0.0625093	0.403168	Mlx
ENSMUSG00000017802	ENSMUSG00000017802.14	3495.21	-0.231664	0.112827	-2.05328	0.0400459	0.325011	Retreg3
ENSMUSG00000017830	ENSMUSG00000017830.15	109.107	0.105014	0.127112	0.826147	0.408721	0.802728	Dhx58
ENSMUSG00000017831	ENSMUSG00000017831.7	2405.7	0.216786	0.105884	2.04738	0.0406205	0.327813	Rab5a
ENSMUSG00000017837	ENSMUSG00000017837.12	1450.91	0.123708	0.0679251	1.82124	0.06857	0.421027	Nkiras2
ENSMUSG00000017843	ENSMUSG00000017843.13	3015.01	0.126085	0.0723208	1.74342	0.0812604	0.450985	Ppp2r5c
ENSMUSG00000017858	ENSMUSG00000017858.12	1482.96	-0.108201	0.103766	-1.04274	0.297071	0.735611	Ift52
ENSMUSG00000017861	ENSMUSG00000017861.11	1357.54	0.170267	0.092672	1.8373	0.066165	0.413684	Mybl2
ENSMUSG00000017868	ENSMUSG00000017868.16	956.514	0.320642	0.134499	2.38398	0.0171266	0.203675	Sgk2
ENSMUSG00000017929	ENSMUSG00000017929.13	1282.44	0.122581	0.10115	1.21187	0.225561	0.675195	B4galt5
ENSMUSG00000017943	ENSMUSG00000017943.15	4160.24	0.114997	0.0929653	1.23699	0.216091	0.667088	Gdap1l1
ENSMUSG00000017950	ENSMUSG00000017950.16	442.297	0.0457924	0.145697	0.314299	0.753294	0.943881	Hnf4a
ENSMUSG00000017999	ENSMUSG00000017999.16	1892.17	0.0234633	0.0648193	0.361979	0.717368	0.935997	Ddx27
ENSMUSG00000018001	ENSMUSG00000018001.18	1008.09	0.031975	0.0760502	0.420446	0.67416	0.927604	Cyth3
ENSMUSG00000018012	ENSMUSG00000018012.11	130.956	-0.00289999	0.126132	-0.0229918	0.981657	0.997345	Rac3
ENSMUSG00000018040	ENSMUSG00000018040.9	2891.83	0.0466745	0.0687526	0.678877	0.497216	0.853814	Rrp7a
ENSMUSG00000018042	ENSMUSG00000018042.17	19890.8	0.245963	0.106356	2.31263	0.0207428	0.228393	Cyb5r3
ENSMUSG00000018068	ENSMUSG00000018068.13	1006.76	-0.0187085	0.112354	-0.166515	0.867752	0.974473	Ints2
ENSMUSG00000018076	ENSMUSG00000018076.12	448.691	-0.0410132	0.127511	-0.321643	0.747723	0.942084	Med13l
ENSMUSG00000018102	ENSMUSG00000018102.4	1018.55	0.0204168	0.145368	0.140448	0.888306	0.978618	Hist1h2bc
ENSMUSG00000018143	ENSMUSG00000018143.10	570.904	-0.227203	0.104715	-2.16973	0.0300275	0.277962	Mafk
ENSMUSG00000018160	ENSMUSG00000018160.15	1424.67	0.0487239	0.0674008	0.722898	0.469743	0.839782	Med1
ENSMUSG00000018167	ENSMUSG00000018167.10	751.604	-0.0589647	0.0859405	-0.68611	0.492643	0.852803	Stard3
ENSMUSG00000018168	ENSMUSG00000018168.8	218.004	-0.021971	0.102081	-0.215232	0.829587	0.963218	Ikzf3
ENSMUSG00000018169	ENSMUSG00000018169.12	232.891	-0.331978	0.10998	-3.01853	0.00254003	0.0676347	Mfng
ENSMUSG00000018171	ENSMUSG00000018171.9	2426.18	0.0578328	0.0920939	0.627976	0.53002	0.869704	Vmp1
ENSMUSG00000018189	ENSMUSG00000018189.12	2103.81	0.189791	0.0857608	2.21303	0.0268958	0.262366	Uchl5
ENSMUSG00000018196	ENSMUSG00000018196.18	947.309	0.00888284	0.0910468	0.0975634	0.922279	0.985705	Glrx2
ENSMUSG00000018199	ENSMUSG00000018199.8	2194.69	0.212979	0.101597	2.09631	0.0360546	0.30677	Trove2
ENSMUSG00000018209	ENSMUSG00000018209.15	1361.27	-0.11568	0.0710854	-1.62734	0.103665	0.500588	Stk4
ENSMUSG00000018217	ENSMUSG00000018217.12	342.542	-0.298305	0.115138	-2.59084	0.00957414	0.149523	Pmp22
ENSMUSG00000018239	ENSMUSG00000018239.9	315.186	0.0626381	0.0933567	0.670954	0.50225	0.856225	Zcchc10
ENSMUSG00000018286	ENSMUSG00000018286.6	5009.58	0.142423	0.114563	1.24318	0.213801	0.663698	Psmb6
ENSMUSG00000018287	ENSMUSG00000018287.12	1882.31	0.0340753	0.101822	0.334656	0.737885	0.939958	Spag7
ENSMUSG00000018293	ENSMUSG00000018293.4	7932.02	0.110156	0.0959669	1.14786	0.251028	0.697607	Pfn1
ENSMUSG00000018322	ENSMUSG00000018322.10	1484.55	0.079569	0.0979136	0.812645	0.416422	0.808586	Tomm34
ENSMUSG00000018326	ENSMUSG00000018326.9	9588.9	0.095906	0.0635426	1.50932	0.131218	0.552323	Ywhab
ENSMUSG00000018334	ENSMUSG00000018334.17	125.328	-0.0697104	0.141079	-0.494123	0.621219	0.907988	Ksr1
ENSMUSG00000018340	ENSMUSG00000018340.13	5179.87	0.273582	0.0882584	3.09979	0.00193658	0.0556695	Anxa6
ENSMUSG00000018347	ENSMUSG00000018347.16	533.069	-0.0851288	0.0708703	-1.20119	0.229677	0.679825	Zkscan6
ENSMUSG00000018362	ENSMUSG00000018362.14	10939.5	0.0508951	0.053307	0.954755	0.339702	0.763007	Kpna2
ENSMUSG00000018363	ENSMUSG00000018363.16	1127.75	0.0698105	0.083298	0.838081	0.401985	0.79975	Smurf2
ENSMUSG00000018372	ENSMUSG00000018372.13	511.521	-0.0824314	0.0936127	-0.880558	0.378557	0.789109	Cep95
ENSMUSG00000018377	ENSMUSG00000018377.10	916.622	-0.125104	0.0944645	-1.32435	0.185387	0.631891	Vezf1
ENSMUSG00000018378	ENSMUSG00000018378.13	131.686	-0.242975	0.146007	-1.66414	0.0960851	0.48614	Cuedc1
ENSMUSG00000018379	ENSMUSG00000018379.17	5027.05	0.0741941	0.0674284	1.10034	0.271185	0.713936	Srsf1
ENSMUSG00000018395	ENSMUSG00000018395.19	868.85	0.148713	0.075411	1.97203	0.0486059	0.355952	Kif3a
ENSMUSG00000018398	ENSMUSG00000018398.18	1702.95	0.0189471	0.123881	0.152945	0.878441	0.976224	2008-09-01
ENSMUSG00000018401	ENSMUSG00000018401.17	2803.06	0.157191	0.0898379	1.74972	0.0801673	0.447549	Mtmr4
ENSMUSG00000018405	ENSMUSG00000018405.7	568.867	-0.21062	0.10535	-1.99924	0.045582	0.34404	Mrm1
ENSMUSG00000018411	ENSMUSG00000018411.17	1510.05	-0.00310885	0.144702	-0.0214845	0.982859	0.99741	Mapt
ENSMUSG00000018412	ENSMUSG00000018412.16	2283.88	-0.0427226	0.119721	-0.356851	0.721203	0.937077	Kansl1
ENSMUSG00000018415	ENSMUSG00000018415.14	1533.5	-0.0118105	0.133287	-0.0886098	0.929392	0.985827	Gid4
ENSMUSG00000018417	ENSMUSG00000018417.14	1178.01	-0.311872	0.117325	-2.6582	0.00785601	0.134441	Myo1b
ENSMUSG00000018425	ENSMUSG00000018425.18	1595.56	-0.0801794	0.116786	-0.686549	0.492367	0.852803	Dhx40
ENSMUSG00000018427	ENSMUSG00000018427.7	988.626	-0.0287455	0.0797279	-0.360545	0.71844	0.935997	Ypel2
ENSMUSG00000018428	ENSMUSG00000018428.15	1001.72	0.00416627	0.117937	0.0353263	0.97182	0.995539	Akap1
ENSMUSG00000018433	ENSMUSG00000018433.14	1306.76	0.159074	0.0842129	1.88895	0.0588984	0.391852	Nol11
ENSMUSG00000018442	ENSMUSG00000018442.13	3258.43	0.182245	0.086492	2.10708	0.035111	0.303099	Derl2
ENSMUSG00000018446	ENSMUSG00000018446.8	1704.84	0.144888	0.100459	1.44226	0.149229	0.58254	C1qbp
ENSMUSG00000018449	ENSMUSG00000018449.12	404.314	0.0717157	0.0949731	0.755116	0.45018	0.826019	Rpain
ENSMUSG00000018470	ENSMUSG00000018470.8	862.04	-0.331549	0.128896	-2.57223	0.0101047	0.154189	Kcnab3
ENSMUSG00000018474	ENSMUSG00000018474.17	4667.22	-0.260251	0.11486	-2.26581	0.0234629	0.244449	Chd3
ENSMUSG00000018476	ENSMUSG00000018476.7	1636.39	-0.0955933	0.139851	-0.683538	0.494267	0.852929	Kdm6b
ENSMUSG00000018481	ENSMUSG00000018481.9	3020.98	0.0489214	0.0779525	0.62758	0.530279	0.869723	Appbp2
ENSMUSG00000018500	ENSMUSG00000018500.2	40.8667	-0.131607	0.145097	-0.907027	0.364392	0.781659	Adora2b
ENSMUSG00000018501	ENSMUSG00000018501.17	6121.43	-0.016145	0.109872	-0.146944	0.883176	0.976958	Ncor1
ENSMUSG00000018507	ENSMUSG00000018507.16	434.606	0.257231	0.0980274	2.62408	0.00868838	0.141566	Trpv2
ENSMUSG00000018509	ENSMUSG00000018509.8	1247.21	-0.106501	0.0922111	-1.15497	0.248103	0.695618	Cenpv
ENSMUSG00000018537	ENSMUSG00000018537.16	932.465	0.0484256	0.104905	0.461614	0.644358	0.915153	Pcgf2
ENSMUSG00000018541	ENSMUSG00000018541.10	739.813	-0.00957176	0.0731274	-0.130892	0.895861	0.98027	Cwc25
ENSMUSG00000018547	ENSMUSG00000018547.8	993.763	-0.0465491	0.0867323	-0.536699	0.591476	0.895697	Pip4k2b
ENSMUSG00000018548	ENSMUSG00000018548.15	5302.04	0.160303	0.0743899	2.15491	0.0311692	0.283467	Trim37
ENSMUSG00000018554	ENSMUSG00000018554.13	397.489	-0.034641	0.129308	-0.267895	0.78878	0.954347	Ybx2
ENSMUSG00000018559	ENSMUSG00000018559.16	3287.51	0.0468155	0.0862916	0.542527	0.587456	0.894311	Ctdnep1
ENSMUSG00000018565	ENSMUSG00000018565.17	2450.51	0.173508	0.106833	1.6241	0.104354	0.501644	Elp5
ENSMUSG00000018566	ENSMUSG00000018566.14	72.2614	-0.146091	0.140278	-1.04144	0.297672	0.736076	Slc2a4
ENSMUSG00000018567	ENSMUSG00000018567.14	13965	0.214236	0.106589	2.00992	0.0444399	0.339973	Gabarap
ENSMUSG00000018569	ENSMUSG00000018569.12	908.822	-0.0125922	0.130054	-0.0968226	0.922867	0.985705	Cldn7
ENSMUSG00000018570	ENSMUSG00000018570.17	67.3473	-0.22967	0.136571	-1.68168	0.0926301	0.477746	2810408A11Rik
ENSMUSG00000018572	ENSMUSG00000018572.10	1218.51	0.0611037	0.107213	0.569931	0.568724	0.888146	Phf23
ENSMUSG00000018574	ENSMUSG00000018574.14	2484.52	0.163975	0.0770552	2.12802	0.0333358	0.293351	Acadvl
ENSMUSG00000018583	ENSMUSG00000018583.5	8144.51	0.148076	0.0514464	2.87825	0.00399892	0.0912678	G3bp1
ENSMUSG00000018585	ENSMUSG00000018585.9	1849.66	0.0141193	0.135988	0.103828	0.917306	0.984548	Atox1
ENSMUSG00000018599	ENSMUSG00000018599.5	386.868	0.0321689	0.116934	0.275102	0.783238	0.952711	Mief2
ENSMUSG00000018634	ENSMUSG00000018634.10	2388.69	0.128211	0.136284	0.940764	0.346826	0.768352	Crhr1
ENSMUSG00000018648	ENSMUSG00000018648.15	1571.45	0.148722	0.0943403	1.57644	0.114925	0.522571	Dusp14
ENSMUSG00000018651	ENSMUSG00000018651.14	700.084	0.0174333	0.0854926	0.203916	0.838419	0.965671	Tada2a
ENSMUSG00000018659	ENSMUSG00000018659.12	837.812	0.11501	0.11865	0.969318	0.332386	0.758193	Pnpo
ENSMUSG00000018661	ENSMUSG00000018661.17	3523.72	-0.0986038	0.0689609	-1.42985	0.15276	0.589042	Cog1
ENSMUSG00000018666	ENSMUSG00000018666.13	2526.57	0.000286441	0.0519546	0.00551328	0.995601	0.998655	Cbx1
ENSMUSG00000018669	ENSMUSG00000018669.14	2409.81	-0.0680804	0.0763908	-0.891212	0.372815	0.786649	Cdk5rap3
ENSMUSG00000018672	ENSMUSG00000018672.15	720.788	0.143647	0.0999721	1.43687	0.150754	0.584435	Copz2
ENSMUSG00000018677	ENSMUSG00000018677.9	9356.8	0.0083177	0.0932485	0.0891993	0.928924	0.985705	Slc25a39
ENSMUSG00000018678	ENSMUSG00000018678.13	653.256	-0.115953	0.0979036	-1.18436	0.236269	0.685376	Sp2
ENSMUSG00000018697	ENSMUSG00000018697.14	809.745	0.0877807	0.0997082	0.880376	0.378656	0.789109	Aatf
ENSMUSG00000018698	ENSMUSG00000018698.15	797.406	-0.11843	0.11596	-1.0213	0.307113	0.743099	Lhx1
ENSMUSG00000018707	ENSMUSG00000018707.13	10847.7	-0.0358437	0.0821457	-0.436343	0.662588	0.924603	Dync1h1
ENSMUSG00000018733	ENSMUSG00000018733.10	425.179	-0.0947536	0.121126	-0.782274	0.434053	0.817527	Pex12
ENSMUSG00000018736	ENSMUSG00000018736.14	2806.69	0.0957401	0.0866304	1.10516	0.269092	0.711911	Ndel1
ENSMUSG00000018740	ENSMUSG00000018740.14	411.398	0.149714	0.112154	1.33489	0.181911	0.62816	Slc25a35
ENSMUSG00000018750	ENSMUSG00000018750.14	1539.09	-0.192423	0.0871745	-2.20732	0.0272914	0.263587	Zbtb4
ENSMUSG00000018752	ENSMUSG00000018752.19	157.943	-0.0591683	0.12683	-0.466516	0.640846	0.914411	Tnfsfm13
ENSMUSG00000018761	ENSMUSG00000018761.14	1547.6	-0.0544151	0.106843	-0.509299	0.610543	0.90438	Mpdu1
ENSMUSG00000018765	ENSMUSG00000018765.5	5399.81	0.0561957	0.0604755	0.929232	0.352769	0.773559	Fxr2
ENSMUSG00000018770	ENSMUSG00000018770.9	11833.2	0.24954	0.0931025	2.68027	0.00735629	0.13024	Atp5g3
ENSMUSG00000018774	ENSMUSG00000018774.13	302.88	0.138267	0.124788	1.10802	0.267854	0.711385	Cd68
ENSMUSG00000018796	ENSMUSG00000018796.13	477.629	-0.195009	0.123117	-1.58394	0.113208	0.518591	Acsl1
ENSMUSG00000018800	ENSMUSG00000018800.14	1880.7	-0.11543	0.105288	-1.09633	0.272934	0.71564	Abca5
ENSMUSG00000018809	ENSMUSG00000018809.2	805.558	0.141988	0.100302	1.4156	0.156893	0.595452	Smyd4
ENSMUSG00000018820	ENSMUSG00000018820.13	1919.98	-0.166098	0.0719186	-2.30953	0.0209142	0.229472	Zfyve27
ENSMUSG00000018821	ENSMUSG00000018821.3	188.158	-0.0774941	0.12442	-0.622843	0.533387	0.871779	Avpi1
ENSMUSG00000018841	ENSMUSG00000018841.17	667.01	-0.0404025	0.0946492	-0.426865	0.669477	0.925331	Rad51d
ENSMUSG00000018846	ENSMUSG00000018846.8	4137.66	0.0666181	0.112869	0.590226	0.555039	0.88186	Pank3
ENSMUSG00000018848	ENSMUSG00000018848.4	2778.7	0.126906	0.0673056	1.88551	0.0593605	0.392679	Rars
ENSMUSG00000018858	ENSMUSG00000018858.15	1418.09	0.0418315	0.103139	0.405584	0.685048	0.931173	Mrpl58
ENSMUSG00000018861	ENSMUSG00000018861.8	608.232	0.0696733	0.0789104	0.882941	0.377268	0.788723	Fdxr
ENSMUSG00000018862	ENSMUSG00000018862.11	223.335	0.166466	0.138473	1.20215	0.229304	0.679474	Otop3
ENSMUSG00000018865	ENSMUSG00000018865.8	1309.33	-0.129965	0.118709	-1.09482	0.273594	0.716522	Sult4a1
ENSMUSG00000018882	ENSMUSG00000018882.12	1048.11	0.155799	0.108992	1.42946	0.152873	0.589042	Mrpl45
ENSMUSG00000018899	ENSMUSG00000018899.16	966.515	-0.178196	0.0864337	-2.06165	0.0392414	0.321553	Irf1
ENSMUSG00000018900	ENSMUSG00000018900.7	514.922	-0.0356977	0.127894	-0.27912	0.780153	0.951422	Slc22a5
ENSMUSG00000018906	ENSMUSG00000018906.14	2301.93	-0.094106	0.127188	-0.739898	0.459362	0.832245	P4ha2
ENSMUSG00000018909	ENSMUSG00000018909.15	612.863	-0.186605	0.134259	-1.38989	0.164562	0.603971	Arrb1
ENSMUSG00000018920	ENSMUSG00000018920.11	129.045	-0.0813091	0.121375	-0.669902	0.50292	0.856225	Cxcl16
ENSMUSG00000018921	ENSMUSG00000018921.11	2099.72	0.135726	0.0659478	2.05808	0.0395823	0.32262	Pelp1
ENSMUSG00000018923	ENSMUSG00000018923.13	794.623	-0.0248863	0.102747	-0.242211	0.808617	0.958353	Med11
ENSMUSG00000018931	ENSMUSG00000018931.3	914.682	-0.230096	0.105428	-2.18249	0.0290737	0.273828	Natd1
ENSMUSG00000018932	ENSMUSG00000018932.9	1289.05	-0.0578623	0.0917894	-0.630382	0.528445	0.869274	Map2k3
ENSMUSG00000018965	ENSMUSG00000018965.11	14129.2	0.14979	0.113832	1.31589	0.18821	0.635637	Ywhah
ENSMUSG00000018974	ENSMUSG00000018974.7	2355.84	0.0652098	0.0751119	0.868169	0.385302	0.792576	Sart3
ENSMUSG00000018983	ENSMUSG00000018983.9	1904.64	-0.133154	0.0843804	-1.57802	0.11456	0.522075	E2f2
ENSMUSG00000018995	ENSMUSG00000018995.12	443.363	-0.0105675	0.130343	-0.0810749	0.935382	0.986761	Nars2
ENSMUSG00000018999	ENSMUSG00000018999.14	1738.25	0.067876	0.0877178	0.773799	0.43905	0.820234	Slc35b4
ENSMUSG00000019039	ENSMUSG00000019039.13	1553.15	-0.0708139	0.0770971	-0.918504	0.358355	0.776233	Dalrd3
ENSMUSG00000019054	ENSMUSG00000019054.13	3212.46	0.122535	0.124494	0.984262	0.324987	0.754224	Fis1
ENSMUSG00000019055	ENSMUSG00000019055.15	1106.05	-0.173309	0.125864	-1.37695	0.168528	0.609005	Plod1
ENSMUSG00000019066	ENSMUSG00000019066.13	4434.41	-0.173048	0.0853643	-2.02717	0.0426454	0.333358	Rab3d
ENSMUSG00000019080	ENSMUSG00000019080.7	336.57	-0.115298	0.101581	-1.13504	0.25636	0.702061	Mfsd3
ENSMUSG00000019082	ENSMUSG00000019082.18	2377.65	0.240453	0.0784939	3.06334	0.00218882	0.0605756	Slc25a22
ENSMUSG00000019087	ENSMUSG00000019087.13	13320.3	0.0463114	0.0838848	0.552083	0.580891	0.892821	Atp6ap1
ENSMUSG00000019088	ENSMUSG00000019088.13	282.289	0.0152967	0.104514	0.146359	0.883638	0.977133	Dnase1l1
ENSMUSG00000019124	ENSMUSG00000019124.10	3087.42	0.177026	0.0739215	2.39478	0.0166303	0.202349	Scrn1
ENSMUSG00000019132	ENSMUSG00000019132.10	7556.09	0.0734605	0.0716773	1.02488	0.305421	0.741488	BC005537
ENSMUSG00000019139	ENSMUSG00000019139.10	3544.35	0.070526	0.0993786	0.70967	0.477909	0.843734	Isyna1
ENSMUSG00000019143	ENSMUSG00000019143.15	1056.7	0.057643	0.0834926	0.690396	0.489945	0.851509	Hars2
ENSMUSG00000019146	ENSMUSG00000019146.2	74.1676	-0.0294248	0.138233	-0.212864	0.831433	0.963529	Cacng2
ENSMUSG00000019158	ENSMUSG00000019158.9	570.555	0.081476	0.104255	0.781503	0.434507	0.817805	Tmem160
ENSMUSG00000019173	ENSMUSG00000019173.11	4820.84	0.0443973	0.102593	0.432753	0.665194	0.925058	Rab5c
ENSMUSG00000019179	ENSMUSG00000019179.10	13186.3	0.164903	0.083569	1.97326	0.0484664	0.355376	Mdh2
ENSMUSG00000019188	ENSMUSG00000019188.16	6914.87	0.0507893	0.0891097	0.569964	0.568702	0.888146	H13
ENSMUSG00000019189	ENSMUSG00000019189.13	3595.03	0.0149384	0.0974342	0.153318	0.878148	0.976224	Rnf145
ENSMUSG00000019194	ENSMUSG00000019194.15	898.251	-0.253928	0.115769	-2.19341	0.028278	0.269609	Scn1b
ENSMUSG00000019210	ENSMUSG00000019210.10	6225.42	-0.0170452	0.0914797	-0.186327	0.852188	0.9698	Atp6v1e1
ENSMUSG00000019214	ENSMUSG00000019214.13	965.802	0.298229	0.0790613	3.77212	0.000161865	0.011424	Chtf18
ENSMUSG00000019235	ENSMUSG00000019235.8	104.315	-0.32228	0.117678	-2.73865	0.00616916	0.11704	Rps6kl1
ENSMUSG00000019254	ENSMUSG00000019254.16	2829.05	0.0520113	0.0757651	0.686481	0.49241	0.852803	Ppp1r12c
ENSMUSG00000019256	ENSMUSG00000019256.17	129.2	-0.0675816	0.127979	-0.528068	0.597452	0.89784	Ahr
ENSMUSG00000019261	ENSMUSG00000019261.3	1890.58	-0.0119171	0.0941469	-0.12658	0.899273	0.981243	Map1s
ENSMUSG00000019278	ENSMUSG00000019278.5	58.5994	-0.015393	0.145732	-0.105625	0.91588	0.984548	Dpep1
ENSMUSG00000019295	ENSMUSG00000019295.8	1789.82	-0.0400097	0.0884774	-0.452203	0.651123	0.919167	Tmem129
ENSMUSG00000019297	ENSMUSG00000019297.8	1206.05	0.0144472	0.086436	0.167144	0.867257	0.974473	Nop9
ENSMUSG00000019301	ENSMUSG00000019301.5	36.6744	-0.101934	0.129135	-0.789359	0.429902	0.815671	Hsd17b1
ENSMUSG00000019302	ENSMUSG00000019302.16	8761.58	0.174561	0.0727827	2.39838	0.0164677	0.201949	Atp6v0a1
ENSMUSG00000019303	ENSMUSG00000019303.14	863.38	0.239704	0.11431	2.09697	0.035996	0.306471	Psmc3ip
ENSMUSG00000019312	ENSMUSG00000019312.10	1324.79	-0.0242651	0.0791912	-0.306411	0.759292	0.945578	Grb7
ENSMUSG00000019320	ENSMUSG00000019320.13	166.823	-0.160018	0.141914	-1.12757	0.259502	0.704211	Noxo1
ENSMUSG00000019338	ENSMUSG00000019338.13	1387.91	0.0317682	0.0960837	0.330631	0.740923	0.940454	Zfp687
ENSMUSG00000019362	ENSMUSG00000019362.8	4671.57	0.116219	0.101802	1.14161	0.253616	0.699563	D8Ertd738e
ENSMUSG00000019370	ENSMUSG00000019370.10	11124.2	0.319219	0.111817	2.85484	0.00430579	0.0957662	Calm3
ENSMUSG00000019373	ENSMUSG00000019373.11	4767.14	0.0832393	0.063462	1.31164	0.189642	0.637324	Cops3
ENSMUSG00000019428	ENSMUSG00000019428.16	8921.04	0.0586914	0.0816234	0.719051	0.47211	0.841375	Fkbp8
ENSMUSG00000019429	ENSMUSG00000019429.7	1081.58	-0.0367119	0.0847794	-0.433029	0.664994	0.925058	Ffar3
ENSMUSG00000019432	ENSMUSG00000019432.15	8987.31	-0.0452775	0.0574263	-0.788445	0.430436	0.816119	Ddx39b
ENSMUSG00000019433	ENSMUSG00000019433.9	1786.89	0.152828	0.0762414	2.00453	0.0450135	0.342308	Gipc1
ENSMUSG00000019437	ENSMUSG00000019437.17	1099.5	0.108304	0.110435	0.980705	0.326738	0.754362	Tlcd1
ENSMUSG00000019461	ENSMUSG00000019461.12	646.328	-0.0893718	0.137817	-0.64848	0.516675	0.863191	Plscr3
ENSMUSG00000019464	ENSMUSG00000019464.6	38.4566	-0.0951864	0.145591	-0.653795	0.513244	0.861984	Ptger1
ENSMUSG00000019467	ENSMUSG00000019467.13	531.849	-0.100556	0.0809666	-1.24195	0.214255	0.664488	Arhgef25
ENSMUSG00000019470	ENSMUSG00000019470.12	1525.39	0.0196616	0.0710162	0.27686	0.781887	0.951693	Xab2
ENSMUSG00000019471	ENSMUSG00000019471.10	5599.12	0.112388	0.0680308	1.65201	0.0985316	0.490347	Cdc37
ENSMUSG00000019478	ENSMUSG00000019478.16	557.862	0.0643305	0.105852	0.607738	0.543361	0.875214	Rab4a
ENSMUSG00000019487	ENSMUSG00000019487.10	183.979	0.128934	0.140434	0.918114	0.358559	0.77636	Trip10
ENSMUSG00000019494	ENSMUSG00000019494.14	4548.18	0.165519	0.109127	1.51675	0.129329	0.548633	Cops6
ENSMUSG00000019505	ENSMUSG00000019505.7	62829.9	0.0180426	0.087094	0.207163	0.835883	0.965089	Ubb
ENSMUSG00000019518	ENSMUSG00000019518.10	1104.2	0.00902419	0.100311	0.0899617	0.928318	0.985705	Ap4m1
ENSMUSG00000019528	ENSMUSG00000019528.18	1330.75	0.0633341	0.0795624	0.796031	0.426014	0.81459	Gyg
ENSMUSG00000019539	ENSMUSG00000019539.11	319.564	0.292766	0.128207	2.28354	0.0223986	0.238758	Rcn3
ENSMUSG00000019558	ENSMUSG00000019558.14	976.571	-0.156195	0.10829	-1.44238	0.149195	0.58254	Slc6a8
ENSMUSG00000019564	ENSMUSG00000019564.12	237.697	-0.534771	0.121791	-4.3909	1.13e-05	0.00160524	Arid3a
ENSMUSG00000019578	ENSMUSG00000019578.11	3005.22	-0.0417025	0.0759193	-0.5493	0.582799	0.892926	Ubxn6
ENSMUSG00000019579	ENSMUSG00000019579.13	4550.27	-0.0519272	0.0969223	-0.535761	0.592124	0.895697	Mydgf
ENSMUSG00000019590	ENSMUSG00000019590.16	3201.22	-0.155951	0.0651591	-2.39339	0.0166935	0.202597	Cyb561
ENSMUSG00000019647	ENSMUSG00000019647.16	289.782	-0.302752	0.136247	-2.22208	0.0262778	0.258836	Sema6a
ENSMUSG00000019659	ENSMUSG00000019659.8	1297.74	0.00897436	0.109791	0.0817407	0.934853	0.986608	Ccdc12
ENSMUSG00000019689	ENSMUSG00000019689.4	941.346	0.354711	0.109022	3.25358	0.0011396	0.0397728	Fmc1
ENSMUSG00000019699	ENSMUSG00000019699.16	2340.59	-0.209831	0.104989	-1.9986	0.045652	0.344343	Akt3
ENSMUSG00000019710	ENSMUSG00000019710.13	1932.68	-0.0412677	0.0874524	-0.471887	0.637007	0.912683	Mrpl24
ENSMUSG00000019715	ENSMUSG00000019715.14	2031.24	0.0605769	0.0819176	0.739486	0.459612	0.832367	Gle1
ENSMUSG00000019726	ENSMUSG00000019726.10	690.453	-0.0800445	0.139986	-0.571805	0.567454	0.888146	Lyst
ENSMUSG00000019731	ENSMUSG00000019731.13	6533.64	0.00255454	0.118834	0.0214968	0.982849	0.99741	Slc35e1
ENSMUSG00000019732	ENSMUSG00000019732.14	39.2919	-0.0184538	0.145357	-0.126955	0.898976	0.981094	Calr3
ENSMUSG00000019734	ENSMUSG00000019734.16	2071.89	-0.0810792	0.0772183	-1.05	0.293718	0.733714	Tmc4
ENSMUSG00000019737	ENSMUSG00000019737.14	1970.67	0.0267597	0.0772354	0.34647	0.72899	0.938791	Syne4
ENSMUSG00000019738	ENSMUSG00000019738.15	768.348	0.126965	0.10687	1.18804	0.234818	0.68322	Polr2i
ENSMUSG00000019756	ENSMUSG00000019756.10	229.686	0.015103	0.0959	0.157487	0.874861	0.97593	Prl8a1
ENSMUSG00000019761	ENSMUSG00000019761.10	136.604	-0.010922	0.133647	-0.0817223	0.934868	0.986608	Krt10
ENSMUSG00000019763	ENSMUSG00000019763.11	811.82	0.0309965	0.0850427	0.364481	0.715499	0.935647	Rmnd1
ENSMUSG00000019768	ENSMUSG00000019768.16	175.761	-0.360223	0.113876	-3.16329	0.00155996	0.0483804	Esr1
ENSMUSG00000019773	ENSMUSG00000019773.7	1524.41	0.0164213	0.0848423	0.193551	0.846528	0.968351	Fbxo5
ENSMUSG00000019774	ENSMUSG00000019774.8	398.676	-0.0298071	0.0868643	-0.343145	0.731489	0.938791	Mtrf1l
ENSMUSG00000019775	ENSMUSG00000019775.17	577.674	-0.00955964	0.135154	-0.0707314	0.943612	0.989095	Rgs17
ENSMUSG00000019777	ENSMUSG00000019777.16	4630	0.10169	0.0625328	1.62618	0.103911	0.500895	Hdac2
ENSMUSG00000019779	ENSMUSG00000019779.15	488.79	-0.227873	0.103051	-2.21127	0.0270169	0.262366	Frk
ENSMUSG00000019782	ENSMUSG00000019782.9	2871.11	0.172283	0.121065	1.42306	0.154718	0.591966	Rwdd1
ENSMUSG00000019789	ENSMUSG00000019789.9	105.033	-0.00552061	0.139399	-0.0396031	0.96841	0.995519	Hey2
ENSMUSG00000019790	ENSMUSG00000019790.16	2009.84	0.0809329	0.0795897	1.01688	0.309212	0.743522	Stxbp5
ENSMUSG00000019791	ENSMUSG00000019791.12	297.742	0.155892	0.137817	1.13115	0.257992	0.702822	Hint3
ENSMUSG00000019792	ENSMUSG00000019792.8	435.527	0.0829889	0.0856038	0.969453	0.332319	0.758168	Trmt11
ENSMUSG00000019794	ENSMUSG00000019794.13	1135.62	0.0530786	0.0965133	0.549962	0.582346	0.892926	Katna1
ENSMUSG00000019795	ENSMUSG00000019795.17	4423.56	0.161224	0.0715452	2.25346	0.0242304	0.248953	Pcmt1
ENSMUSG00000019796	ENSMUSG00000019796.12	11781.6	0.0157759	0.0474282	0.332626	0.739417	0.940232	Lrp11
ENSMUSG00000019797	ENSMUSG00000019797.11	490.725	0.132867	0.111729	1.18919	0.234365	0.68322	1700021F05Rik
ENSMUSG00000019802	ENSMUSG00000019802.13	4587.84	0.127484	0.0870921	1.46379	0.143253	0.572261	Sec63
ENSMUSG00000019804	ENSMUSG00000019804.12	6777.52	0.184865	0.0917898	2.01401	0.0440089	0.337833	Snx3
ENSMUSG00000019806	ENSMUSG00000019806.13	3059.3	0.203459	0.0857729	2.37206	0.0176891	0.207777	Aig1
ENSMUSG00000019808	ENSMUSG00000019808.8	85.1707	0.0054604	0.136123	0.0401139	0.968002	0.995483	Adat2
ENSMUSG00000019809	ENSMUSG00000019809.16	864.751	0.0412562	0.0943167	0.437422	0.661805	0.924184	Pex3
ENSMUSG00000019810	ENSMUSG00000019810.15	2380.12	-0.25584	0.111387	-2.29686	0.0216268	0.234018	Fuca2
ENSMUSG00000019813	ENSMUSG00000019813.16	359.204	-0.214492	0.0913294	-2.34856	0.0188463	0.216061	Cep57l1
ENSMUSG00000019814	ENSMUSG00000019814.4	995.263	0.0746564	0.0748666	0.997192	0.318671	0.75032	Ltv1
ENSMUSG00000019817	ENSMUSG00000019817.18	835.606	-0.0757136	0.139734	-0.541842	0.587928	0.894311	Plagl1
ENSMUSG00000019818	ENSMUSG00000019818.15	22535.7	-0.0358746	0.0938399	-0.382295	0.702242	0.934077	Cd164
ENSMUSG00000019820	ENSMUSG00000019820.9	6901.75	0.197885	0.14277	1.38604	0.165734	0.605102	Utrn
ENSMUSG00000019822	ENSMUSG00000019822.12	990.513	0.147215	0.111361	1.32196	0.186181	0.632483	Smpd2
ENSMUSG00000019823	ENSMUSG00000019823.17	95.4338	0.250434	0.142931	1.75213	0.0797506	0.446784	Mical1
ENSMUSG00000019826	ENSMUSG00000019826.11	762.457	-0.0255187	0.102238	-0.249601	0.802896	0.957091	Zbtb24
ENSMUSG00000019831	ENSMUSG00000019831.14	934.547	0.187499	0.0777554	2.4114	0.0158916	0.197603	Wasf1
ENSMUSG00000019832	ENSMUSG00000019832.3	47.1217	0.0715135	0.142897	0.500456	0.616754	0.906747	Rab32
ENSMUSG00000019837	ENSMUSG00000019837.8	623.842	0.117174	0.115047	1.01849	0.308446	0.743099	Gtf3c6
ENSMUSG00000019838	ENSMUSG00000019838.11	3042.75	-0.114244	0.0818409	-1.39593	0.162736	0.601576	Slc16a10
ENSMUSG00000019841	ENSMUSG00000019841.15	2861.02	-0.160352	0.08561	-1.87306	0.0610605	0.397917	Rev3l
ENSMUSG00000019842	ENSMUSG00000019842.6	562.644	-0.131083	0.117817	-1.1126	0.265879	0.709023	Traf3ip2
ENSMUSG00000019843	ENSMUSG00000019843.14	1344.07	0.185388	0.121658	1.52384	0.127548	0.546565	Fyn
ENSMUSG00000019845	ENSMUSG00000019845.8	606.158	-0.225863	0.115356	-1.95797	0.0502336	0.362566	Tube1
ENSMUSG00000019848	ENSMUSG00000019848.14	68.7821	-0.48194	0.13885	-3.47094	0.00051864	0.0242685	Popdc3
ENSMUSG00000019849	ENSMUSG00000019849.11	2156.37	0.0709408	0.0696361	1.01874	0.308328	0.743099	Prep
ENSMUSG00000019850	ENSMUSG00000019850.11	201.408	-0.124511	0.138163	-0.90119	0.367487	0.783695	Tnfaip3
ENSMUSG00000019851	ENSMUSG00000019851.8	1051.81	-0.0315241	0.0912706	-0.345391	0.7298	0.938791	Perp
ENSMUSG00000019852	ENSMUSG00000019852.7	4415.18	0.0527152	0.133644	0.394445	0.693252	0.932409	Arfgef3
ENSMUSG00000019853	ENSMUSG00000019853.6	80.5934	-0.0408651	0.141064	-0.289691	0.772053	0.949404	Hebp2
ENSMUSG00000019854	ENSMUSG00000019854.17	1850.16	-0.149057	0.0819293	-1.81933	0.0688605	0.42107	Reps1
ENSMUSG00000019856	ENSMUSG00000019856.13	876.746	0.115564	0.119548	0.966673	0.333708	0.759004	Fam184a
ENSMUSG00000019857	ENSMUSG00000019857.6	781.156	0.0912306	0.0961702	0.948636	0.342806	0.765528	Asf1a
ENSMUSG00000019861	ENSMUSG00000019861.14	1816.05	-0.109921	0.0681471	-1.613	0.106745	0.5071	Gopc
ENSMUSG00000019863	ENSMUSG00000019863.7	501.936	0.127555	0.103036	1.23796	0.21573	0.666896	Qrsl1
ENSMUSG00000019864	ENSMUSG00000019864.14	731.331	-0.128344	0.100056	-1.28273	0.199587	0.646803	Rtn4ip1
ENSMUSG00000019866	ENSMUSG00000019866.14	1390	-0.079958	0.0907113	-0.881456	0.378071	0.788987	Crybg1
ENSMUSG00000019868	ENSMUSG00000019868.16	1612.48	0.0846821	0.0810446	1.04488	0.296077	0.735488	Vta1
ENSMUSG00000019872	ENSMUSG00000019872.13	1342.58	0.122277	0.133333	0.917082	0.359099	0.776599	Smpdl3a
ENSMUSG00000019873	ENSMUSG00000019873.7	1594.45	-0.193491	0.0946806	-2.04362	0.0409912	0.329087	Reep3
ENSMUSG00000019874	ENSMUSG00000019874.11	57.5928	0.170379	0.140789	1.21018	0.226212	0.675764	Fabp7
ENSMUSG00000019876	ENSMUSG00000019876.15	561.664	0.210635	0.128518	1.63896	0.101222	0.496164	Pkib
ENSMUSG00000019877	ENSMUSG00000019877.10	10464.2	0.0381024	0.100589	0.378793	0.704841	0.93471	Serinc1
ENSMUSG00000019878	ENSMUSG00000019878.7	1041.41	0.0479054	0.0883861	0.542001	0.587817	0.894311	Hsf2
ENSMUSG00000019883	ENSMUSG00000019883.11	1360.54	0.0994668	0.0848201	1.17268	0.240925	0.689306	Echdc1
ENSMUSG00000019889	ENSMUSG00000019889.9	804.177	0.00696759	0.135661	0.0513604	0.959038	0.993224	Ptprk
ENSMUSG00000019891	ENSMUSG00000019891.14	869.826	0.124192	0.11901	1.04354	0.296698	0.735498	Dcbld1
ENSMUSG00000019894	ENSMUSG00000019894.13	592.627	0.000338255	0.144967	0.00233333	0.998138	0.998981	Slc6a15
ENSMUSG00000019897	ENSMUSG00000019897.8	1328.89	0.0323667	0.0883196	0.366472	0.714013	0.935647	Ccdc59
ENSMUSG00000019900	ENSMUSG00000019900.18	2148.27	-0.0233402	0.0922157	-0.253105	0.800187	0.956574	Rfx6
ENSMUSG00000019907	ENSMUSG00000019907.9	755.929	0.0242784	0.126679	0.191653	0.848014	0.968759	Ppp1r12a
ENSMUSG00000019913	ENSMUSG00000019913.3	337.936	0.142845	0.13679	1.04426	0.296364	0.735498	Sim1
ENSMUSG00000019916	ENSMUSG00000019916.14	4482.42	-0.0240749	0.126156	-0.190834	0.848656	0.968843	P4ha1
ENSMUSG00000019917	ENSMUSG00000019917.9	427.035	-0.154348	0.0948801	-1.62677	0.103786	0.500675	2010-09-01
ENSMUSG00000019920	ENSMUSG00000019920.17	2115.71	-0.0532603	0.0847741	-0.628261	0.529833	0.869632	Lims1
ENSMUSG00000019923	ENSMUSG00000019923.13	10270.7	0.291377	0.0765703	3.80535	0.000141603	0.0104	Zwint
ENSMUSG00000019927	ENSMUSG00000019927.6	842.521	-0.0677983	0.0826025	-0.820778	0.411773	0.805081	Ube2d1
ENSMUSG00000019942	ENSMUSG00000019942.12	7415.12	0.0795441	0.0726466	1.09495	0.27354	0.716522	Cdk1
ENSMUSG00000019943	ENSMUSG00000019943.9	4329.6	0.0117338	0.0935935	0.12537	0.900231	0.981243	Atp2b1
ENSMUSG00000019944	ENSMUSG00000019944.14	157.899	0.0689963	0.140682	0.490443	0.623821	0.907988	Rhobtb1
ENSMUSG00000019945	ENSMUSG00000019945.9	118.863	0.259788	0.128961	2.01446	0.0439609	0.337833	Cabcoco1
ENSMUSG00000019947	ENSMUSG00000019947.9	60.3895	-0.135727	0.140577	-0.965503	0.334293	0.759008	Arid5b
ENSMUSG00000019948	ENSMUSG00000019948.3	324.946	0.148638	0.0977995	1.51982	0.128556	0.54761	Actr6
ENSMUSG00000019951	ENSMUSG00000019951.9	1578.39	0.00766335	0.0859116	0.0892004	0.928923	0.985705	Uhrf1bp1l
ENSMUSG00000019952	ENSMUSG00000019952.14	378.971	-0.290477	0.117334	-2.47564	0.0132999	0.180136	Poc1b
ENSMUSG00000019960	ENSMUSG00000019960.7	250.154	-0.430638	0.13293	-3.23958	0.00119704	0.0411332	Dusp6
ENSMUSG00000019961	ENSMUSG00000019961.17	9490.56	-0.0259956	0.0915421	-0.283975	0.77643	0.950382	Tmpo
ENSMUSG00000019966	ENSMUSG00000019966.17	122.104	-0.331222	0.143987	-2.30037	0.0214275	0.232863	Kitl
ENSMUSG00000019969	ENSMUSG00000019969.13	2264.85	0.0393103	0.0638242	0.615915	0.537951	0.873794	Psen1
ENSMUSG00000019970	ENSMUSG00000019970.15	262.189	-0.0758938	0.143415	-0.529188	0.596675	0.89784	Sgk1
ENSMUSG00000019971	ENSMUSG00000019971.9	854.659	-0.00338054	0.108943	-0.0310305	0.975245	0.996035	Cep290
ENSMUSG00000019975	ENSMUSG00000019975.12	1066.37	0.246801	0.0756238	3.26354	0.00110029	0.0389691	Ikbip
ENSMUSG00000019977	ENSMUSG00000019977.15	3777.06	0.141104	0.110413	1.27796	0.201265	0.648578	Hbs1l
ENSMUSG00000019978	ENSMUSG00000019978.15	1016.58	-0.043165	0.0708072	-0.609613	0.542119	0.875015	Epb41l2
ENSMUSG00000019979	ENSMUSG00000019979.12	830.231	0.0179457	0.118672	0.151221	0.879801	0.97663	Apaf1
ENSMUSG00000019982	ENSMUSG00000019982.15	97.3904	-0.0359879	0.142739	-0.252124	0.800946	0.956594	Myb
ENSMUSG00000019984	ENSMUSG00000019984.16	1535.34	-0.0213297	0.107467	-0.198477	0.842672	0.967116	Med23
ENSMUSG00000019986	ENSMUSG00000019986.17	1296.37	0.182938	0.136798	1.33728	0.18113	0.626594	Ahi1
ENSMUSG00000019988	ENSMUSG00000019988.7	663.651	-0.116837	0.0927083	-1.26027	0.207573	0.655474	Nedd1
ENSMUSG00000019989	ENSMUSG00000019989.7	94.5563	0.164371	0.145659	1.12846	0.259125	0.703866	Enpp3
ENSMUSG00000019992	ENSMUSG00000019992.8	473.386	0.0951117	0.079537	1.19582	0.231768	0.681648	Mtfr2
ENSMUSG00000019996	ENSMUSG00000019996.17	1569.07	-0.130984	0.0917804	-1.42714	0.153539	0.590097	Map7
ENSMUSG00000019998	ENSMUSG00000019998.5	3786.88	0.0675672	0.0652168	1.03604	0.300184	0.738416	Stx7
ENSMUSG00000020000	ENSMUSG00000020000.7	531.349	-0.196123	0.122493	-1.6011	0.109355	0.512855	Moxd1
ENSMUSG00000020003	ENSMUSG00000020003.16	1067.77	-0.123901	0.0849523	-1.45848	0.144708	0.574489	Pex7
ENSMUSG00000020009	ENSMUSG00000020009.12	819.162	-0.0398026	0.129248	-0.307955	0.758117	0.945377	Ifngr1
ENSMUSG00000020015	ENSMUSG00000020015.10	258.552	-0.184806	0.114089	-1.61984	0.105268	0.503079	Cdk17
ENSMUSG00000020018	ENSMUSG00000020018.6	1312.09	0.132902	0.11305	1.1756	0.239754	0.688236	Snrpf
ENSMUSG00000020021	ENSMUSG00000020021.4	2285.99	-0.025041	0.137427	-0.182214	0.855415	0.970971	Fgd6
ENSMUSG00000020022	ENSMUSG00000020022.16	3335.76	0.227634	0.107132	2.12481	0.0336025	0.294728	Ndufa12
ENSMUSG00000020023	ENSMUSG00000020023.17	298.823	-0.0294678	0.123016	-0.239544	0.810684	0.95838	Tmcc3
ENSMUSG00000020024	ENSMUSG00000020024.6	1160.79	0.0203841	0.0661356	0.308217	0.757917	0.945377	Cep83
ENSMUSG00000020027	ENSMUSG00000020027.18	836.977	-0.119242	0.131785	-0.90482	0.365561	0.782458	Socs2
ENSMUSG00000020029	ENSMUSG00000020029.5	3296.3	0.0831767	0.0577202	1.44103	0.149576	0.582981	Nudt4
ENSMUSG00000020032	ENSMUSG00000020032.14	1954.02	0.117024	0.135199	0.865571	0.386725	0.792806	Nuak1
ENSMUSG00000020034	ENSMUSG00000020034.7	181.572	-0.49137	0.137568	-3.57184	0.000354476	0.0189531	Tcp11l2
ENSMUSG00000020038	ENSMUSG00000020038.10	785.587	-0.089035	0.112566	-0.790955	0.42897	0.815457	Cry1
ENSMUSG00000020042	ENSMUSG00000020042.15	500.711	-0.219491	0.136555	-1.60734	0.107979	0.510418	Btbd11
ENSMUSG00000020048	ENSMUSG00000020048.13	41052.5	0.000838661	0.0885856	0.00946724	0.992446	0.998539	Hsp90b1
ENSMUSG00000020056	ENSMUSG00000020056.16	891.545	0.066764	0.0994272	0.671486	0.501911	0.856225	Washc3
ENSMUSG00000020057	ENSMUSG00000020057.2	65.5962	0.110942	0.142746	0.777203	0.437039	0.819028	Dram1
ENSMUSG00000020061	ENSMUSG00000020061.17	126.593	-0.0689233	0.117444	-0.586859	0.557298	0.882863	Mybpc1
ENSMUSG00000020063	ENSMUSG00000020063.16	775.998	-0.0752378	0.121202	-0.620766	0.534754	0.87213	Sirt1
ENSMUSG00000020064	ENSMUSG00000020064.8	1175.04	-0.0726699	0.0775536	-0.937028	0.348744	0.77065	Herc4
ENSMUSG00000020069	ENSMUSG00000020069.16	2148.98	0.208921	0.118351	1.76527	0.077519	0.441498	Hnrnph3
ENSMUSG00000020070	ENSMUSG00000020070.18	1206.18	-0.152179	0.100079	-1.5206	0.128361	0.547437	Rufy2
ENSMUSG00000020072	ENSMUSG00000020072.14	293.282	0.150552	0.13772	1.09317	0.274318	0.716737	Pbld2
ENSMUSG00000020074	ENSMUSG00000020074.6	2707.48	-0.0119017	0.0743171	-0.160148	0.872765	0.975847	Ccar1
ENSMUSG00000020075	ENSMUSG00000020075.7	2321.58	0.211093	0.0880091	2.39854	0.0164606	0.201949	Ddx21
ENSMUSG00000020076	ENSMUSG00000020076.6	4484.88	0.0947762	0.0598054	1.58474	0.113024	0.518563	Ddx50
ENSMUSG00000020078	ENSMUSG00000020078.15	1944.52	0.0708589	0.0859086	0.824818	0.409475	0.803007	Vps26a
ENSMUSG00000020079	ENSMUSG00000020079.15	953.42	0.0156506	0.0765411	0.204474	0.837983	0.965548	Supv3l1
ENSMUSG00000020083	ENSMUSG00000020083.13	262.752	-0.0182887	0.110318	-0.165782	0.868328	0.974598	Fam241b
ENSMUSG00000020085	ENSMUSG00000020085.15	330.896	-0.0259295	0.0990064	-0.261897	0.793401	0.955329	Aifm2
ENSMUSG00000020086	ENSMUSG00000020086.6	1596.63	0.0628754	0.107691	0.583852	0.55932	0.883648	H2afy2
ENSMUSG00000020087	ENSMUSG00000020087.4	1136.31	0.153303	0.0839741	1.8256	0.0679109	0.418711	Tysnd1
ENSMUSG00000020088	ENSMUSG00000020088.9	7786.8	0.0889921	0.0555886	1.60091	0.109398	0.512855	Sar1a
ENSMUSG00000020089	ENSMUSG00000020089.8	3326.39	0.190728	0.078361	2.43397	0.0149344	0.191436	Ppa1
ENSMUSG00000020091	ENSMUSG00000020091.14	743.76	-0.224813	0.122978	-1.82808	0.067538	0.417181	Eif4ebp2
ENSMUSG00000020092	ENSMUSG00000020092.8	339.837	-0.0718086	0.10129	-0.708937	0.478364	0.844242	Pald1
ENSMUSG00000020097	ENSMUSG00000020097.14	2653.58	-0.183515	0.107013	-1.71488	0.0863667	0.463082	Sgpl1
ENSMUSG00000020098	ENSMUSG00000020098.6	4860.63	0.204935	0.133034	1.54047	0.123446	0.536619	Pcbd1
ENSMUSG00000020099	ENSMUSG00000020099.7	414.188	-0.14434	0.13975	-1.03285	0.301675	0.739759	Unc5b
ENSMUSG00000020100	ENSMUSG00000020100.15	345.859	0.0150511	0.109252	0.137765	0.890426	0.978648	Slc29a3
ENSMUSG00000020102	ENSMUSG00000020102.15	39.9721	0.0939539	0.128364	0.731934	0.464209	0.835711	Slc16a7
ENSMUSG00000020107	ENSMUSG00000020107.10	1775.63	-0.106865	0.0876684	-1.21897	0.222855	0.673047	Anapc16
ENSMUSG00000020108	ENSMUSG00000020108.3	1379.28	-0.0146948	0.127562	-0.115197	0.908289	0.98248	Ddit4
ENSMUSG00000020109	ENSMUSG00000020109.13	1616.25	-0.0340278	0.0754988	-0.450707	0.652201	0.919812	Dnajb12
ENSMUSG00000020111	ENSMUSG00000020111.15	2285.58	0.0835129	0.0751544	1.11122	0.266474	0.709554	Micu1
ENSMUSG00000020114	ENSMUSG00000020114.12	5196.8	-0.0227109	0.120169	-0.188991	0.8501	0.969399	Cand1
ENSMUSG00000020115	ENSMUSG00000020115.2	1288.72	-0.0100049	0.0903019	-0.110794	0.91178	0.983954	Tbk1
ENSMUSG00000020116	ENSMUSG00000020116.7	1316.17	-0.0632315	0.0691922	-0.913853	0.360794	0.778866	Pno1
ENSMUSG00000020120	ENSMUSG00000020120.15	218.989	0.0234302	0.0941133	0.248957	0.803394	0.957127	Plek
ENSMUSG00000020121	ENSMUSG00000020121.15	176.202	-0.0875476	0.109628	-0.798591	0.424528	0.813996	Srgap1
ENSMUSG00000020122	ENSMUSG00000020122.16	1646.59	-0.114654	0.0800355	-1.43254	0.151988	0.587634	Egfr
ENSMUSG00000020124	ENSMUSG00000020124.9	1972.86	0.136711	0.0707936	1.93112	0.0534679	0.37491	Usp15
ENSMUSG00000020128	ENSMUSG00000020128.15	1012.04	-0.250738	0.096217	-2.60596	0.00916173	0.146139	Vps54
ENSMUSG00000020130	ENSMUSG00000020130.8	2362.85	-0.0257438	0.118777	-0.216741	0.82841	0.963218	Tbc1d15
ENSMUSG00000020131	ENSMUSG00000020131.14	199.622	-0.0564293	0.114569	-0.492538	0.622339	0.907988	Pcsk4
ENSMUSG00000020132	ENSMUSG00000020132.9	1650.58	0.056359	0.0674737	0.835274	0.403563	0.800157	Rab21
ENSMUSG00000020133	ENSMUSG00000020133.8	1115.39	0.0507172	0.115391	0.439523	0.660282	0.923125	2310011J03Rik
ENSMUSG00000020134	ENSMUSG00000020134.13	612.124	-0.191012	0.105048	-1.81833	0.0690139	0.421143	Peli1
ENSMUSG00000020135	ENSMUSG00000020135.13	813.851	0.101182	0.113764	0.889401	0.373788	0.787458	Apc2
ENSMUSG00000020137	ENSMUSG00000020137.4	486.877	0.00958964	0.104178	0.0920505	0.926658	0.985705	Thap2
ENSMUSG00000020142	ENSMUSG00000020142.12	1383.9	0.201771	0.145622	1.38558	0.165875	0.605102	Slc1a4
ENSMUSG00000020143	ENSMUSG00000020143.15	121.642	-0.173393	0.145901	-1.18843	0.234664	0.68322	Dock2
ENSMUSG00000020149	ENSMUSG00000020149.17	10529.2	0.22043	0.0689277	3.19799	0.00138388	0.0442703	Rab1a
ENSMUSG00000020150	ENSMUSG00000020150.13	91.8562	0.133971	0.144798	0.925226	0.354848	0.774327	Gamt
ENSMUSG00000020151	ENSMUSG00000020151.16	455.276	-0.0285136	0.0889511	-0.320554	0.748549	0.94212	Ptprr
ENSMUSG00000020152	ENSMUSG00000020152.7	3886.67	0.087978	0.0702403	1.25253	0.210377	0.659576	Actr2
ENSMUSG00000020153	ENSMUSG00000020153.14	2113.44	0.123366	0.10705	1.15241	0.249151	0.696015	Ndufs7
ENSMUSG00000020155	ENSMUSG00000020155.2	44.5364	-0.110213	0.14554	-0.757269	0.448889	0.825078	Kcnmb1
ENSMUSG00000020156	ENSMUSG00000020156.16	2281.89	-0.0640086	0.0676575	-0.946069	0.344113	0.766294	Mum1
ENSMUSG00000020160	ENSMUSG00000020160.18	111.473	-0.12583	0.144229	-0.872436	0.382971	0.790739	Meis1
ENSMUSG00000020163	ENSMUSG00000020163.12	3641.27	0.0968791	0.111652	0.867686	0.385566	0.792576	Uqcr11
ENSMUSG00000020166	ENSMUSG00000020166.14	1843.18	-0.00556097	0.0796301	-0.069835	0.944325	0.989402	Cnot2
ENSMUSG00000020167	ENSMUSG00000020167.14	1686.46	-0.0247023	0.0751268	-0.328808	0.742301	0.940596	Tcf3
ENSMUSG00000020169	ENSMUSG00000020169.4	115.446	0.0302428	0.144331	0.209537	0.834029	0.964464	Best3
ENSMUSG00000020170	ENSMUSG00000020170.3	1062.28	0.0149257	0.110167	0.135483	0.89223	0.979424	Frs2
ENSMUSG00000020171	ENSMUSG00000020171.7	1592.38	-0.129493	0.0835981	-1.54899	0.121383	0.534218	Yeats4
ENSMUSG00000020173	ENSMUSG00000020173.17	60.3521	0.0296806	0.141462	0.209813	0.833814	0.964464	Cobl
ENSMUSG00000020175	ENSMUSG00000020175.13	735.847	-0.165779	0.0843382	-1.96565	0.0493395	0.359021	Rab36
ENSMUSG00000020178	ENSMUSG00000020178.5	305.734	-0.0365453	0.141218	-0.258787	0.7958	0.955463	Adora2a
ENSMUSG00000020180	ENSMUSG00000020180.9	2306.22	0.0791029	0.0745175	1.06153	0.288447	0.728621	Snrpd3
ENSMUSG00000020182	ENSMUSG00000020182.16	9317.9	0.0137811	0.0756401	0.182194	0.855431	0.970971	Ddc
ENSMUSG00000020183	ENSMUSG00000020183.11	2750.41	-0.0955196	0.0969572	-0.985173	0.324539	0.754061	Cpm
ENSMUSG00000020184	ENSMUSG00000020184.14	2679.71	0.0166158	0.0729398	0.227801	0.819801	0.960195	Mdm2
ENSMUSG00000020185	ENSMUSG00000020185.16	1776.71	-0.00834629	0.115839	-0.072051	0.942561	0.988829	E2f7
ENSMUSG00000020186	ENSMUSG00000020186.6	384.247	-0.0193901	0.121394	-0.159729	0.873094	0.97593	Csrp2
ENSMUSG00000020189	ENSMUSG00000020189.13	890.984	-0.0230632	0.113131	-0.203863	0.838461	0.965671	Osbpl8
ENSMUSG00000020190	ENSMUSG00000020190.13	2433.13	0.0162004	0.0680106	0.238205	0.811722	0.958676	Mknk2
ENSMUSG00000020196	ENSMUSG00000020196.9	2192.33	-0.054492	0.0859852	-0.633738	0.526252	0.868304	Cabin1
ENSMUSG00000020198	ENSMUSG00000020198.7	6939.87	0.133041	0.0888379	1.49757	0.134244	0.558569	Ap3d1
ENSMUSG00000020205	ENSMUSG00000020205.8	1301.6	0.000601648	0.111196	0.00541069	0.995683	0.998655	Phlda1
ENSMUSG00000020211	ENSMUSG00000020211.15	2453.37	0.0387865	0.0695169	0.557943	0.576883	0.890747	Sf3a2
ENSMUSG00000020212	ENSMUSG00000020212.13	2611.4	0.109924	0.0994432	1.10539	0.268989	0.711911	Mdm1
ENSMUSG00000020219	ENSMUSG00000020219.6	2187.95	-0.0170085	0.114446	-0.148615	0.881857	0.97678	Timm13
ENSMUSG00000020220	ENSMUSG00000020220.16	1118.09	-0.0581685	0.105871	-0.549426	0.582713	0.892926	Vps13d
ENSMUSG00000020224	ENSMUSG00000020224.14	760.55	0.0901142	0.109106	0.825936	0.408841	0.802846	Llph
ENSMUSG00000020225	ENSMUSG00000020225.10	1857.72	0.0329079	0.0947962	0.347144	0.728483	0.938587	Tmbim4
ENSMUSG00000020228	ENSMUSG00000020228.11	664.613	0.00563907	0.116155	0.0485478	0.96128	0.994289	Helb
ENSMUSG00000020230	ENSMUSG00000020230.14	926.447	0.25737	0.0924657	2.78341	0.00537909	0.109108	Prmt2
ENSMUSG00000020231	ENSMUSG00000020231.15	775.459	-0.0112513	0.102007	-0.110299	0.912172	0.983954	Dip2a
ENSMUSG00000020232	ENSMUSG00000020232.17	1338.58	0.232199	0.106033	2.18987	0.028534	0.27089	Hmg20b
ENSMUSG00000020235	ENSMUSG00000020235.16	2566.23	0.08944	0.0646523	1.3834	0.166542	0.605329	Fzr1
ENSMUSG00000020238	ENSMUSG00000020238.14	3406.59	-0.0199741	0.0876152	-0.227975	0.819666	0.960195	Ncln
ENSMUSG00000020246	ENSMUSG00000020246.13	1898.96	0.0873832	0.0855941	1.0209	0.3073	0.743099	Hcfc2
ENSMUSG00000020248	ENSMUSG00000020248.18	1217.46	-0.11398	0.0865168	-1.31743	0.187696	0.635227	Nfyb
ENSMUSG00000020250	ENSMUSG00000020250.9	5984.73	0.129762	0.0980473	1.32347	0.18568	0.631891	Txnrd1
ENSMUSG00000020253	ENSMUSG00000020253.15	859.391	-0.10801	0.097433	-1.10856	0.267619	0.710904	Ppm1m
ENSMUSG00000020255	ENSMUSG00000020255.8	15271.3	0.0502925	0.102333	0.49146	0.623101	0.907988	D10Wsu102e
ENSMUSG00000020256	ENSMUSG00000020256.14	3344.13	0.0186135	0.126923	0.146652	0.883407	0.976958	Aldh1l2
ENSMUSG00000020257	ENSMUSG00000020257.13	3081.93	0.186603	0.0518131	3.60147	0.000316428	0.0175506	Wdr82
ENSMUSG00000020258	ENSMUSG00000020258.16	129.055	-0.11265	0.137885	-0.816986	0.413936	0.807543	Glyctk
ENSMUSG00000020260	ENSMUSG00000020260.8	6022.28	0.0439416	0.116704	0.376522	0.706529	0.934791	Pofut2
ENSMUSG00000020261	ENSMUSG00000020261.15	2765.24	0.043773	0.10294	0.425229	0.67067	0.925833	Slc36a1
ENSMUSG00000020262	ENSMUSG00000020262.15	1872.4	0.309259	0.130225	2.37481	0.0175582	0.206966	Adarb1
ENSMUSG00000020263	ENSMUSG00000020263.14	947.103	-0.0980304	0.116939	-0.838304	0.40186	0.79975	Appl2
ENSMUSG00000020265	ENSMUSG00000020265.15	7463.25	0.153065	0.0717058	2.13463	0.032791	0.290277	Sumo3
ENSMUSG00000020267	ENSMUSG00000020267.6	6441.24	0.083667	0.102993	0.812358	0.416586	0.808671	Hint1
ENSMUSG00000020268	ENSMUSG00000020268.13	94.3035	-0.0454686	0.145967	-0.311499	0.755421	0.94451	Lyrm7
ENSMUSG00000020271	ENSMUSG00000020271.17	2852.54	0.0944891	0.0676367	1.39701	0.162411	0.601189	Fbxw11
ENSMUSG00000020272	ENSMUSG00000020272.8	437.203	0.0940715	0.114378	0.822458	0.410816	0.804362	Stk10
ENSMUSG00000020273	ENSMUSG00000020273.13	328.549	-0.143678	0.0949795	-1.51273	0.130349	0.550676	Papolg
ENSMUSG00000020275	ENSMUSG00000020275.9	625.763	0.0720959	0.102683	0.702123	0.482603	0.846692	Rel
ENSMUSG00000020277	ENSMUSG00000020277.9	10572.1	-0.0195437	0.136535	-0.14314	0.886179	0.977921	Pfkl
ENSMUSG00000020280	ENSMUSG00000020280.12	449.709	-0.0815758	0.108698	-0.750481	0.452965	0.827496	Pus10
ENSMUSG00000020283	ENSMUSG00000020283.5	882.474	0.082493	0.0655163	1.25912	0.207986	0.656088	Pex13
ENSMUSG00000020284	ENSMUSG00000020284.16	1215.5	0.110221	0.0914758	1.20491	0.228236	0.677662	1810043G02Rik
ENSMUSG00000020287	ENSMUSG00000020287.15	532.822	-0.312452	0.0773457	-4.03969	5.35e-05	0.00510994	Mpg
ENSMUSG00000020288	ENSMUSG00000020288.13	1365.24	0.0314958	0.0841977	0.374069	0.708353	0.934791	Ahsa2
ENSMUSG00000020289	ENSMUSG00000020289.15	934.715	-0.101088	0.0979086	-1.03247	0.301851	0.739759	Nprl3
ENSMUSG00000020290	ENSMUSG00000020290.14	6387.18	0.0974698	0.100618	0.968716	0.332687	0.75849	Xpo1
ENSMUSG00000020300	ENSMUSG00000020300.14	2529.07	0.0108345	0.134828	0.0803578	0.935953	0.986886	Cpeb4
ENSMUSG00000020303	ENSMUSG00000020303.2	103.347	-0.057287	0.144035	-0.397731	0.690828	0.931679	Stc2
ENSMUSG00000020305	ENSMUSG00000020305.13	355.337	0.0567051	0.100404	0.564771	0.572229	0.889935	Asb3
ENSMUSG00000020307	ENSMUSG00000020307.14	2027.27	0.143636	0.0956496	1.50169	0.133177	0.555792	Cdc34
ENSMUSG00000020308	ENSMUSG00000020308.5	1528.92	-0.0312972	0.124551	-0.25128	0.801597	0.95676	Tpgs1
ENSMUSG00000020309	ENSMUSG00000020309.6	240.888	0.105317	0.109274	0.963781	0.335156	0.759008	Chac2
ENSMUSG00000020311	ENSMUSG00000020311.17	2214.52	-0.0132984	0.0590072	-0.22537	0.821692	0.961018	Erlec1
ENSMUSG00000020312	ENSMUSG00000020312.11	1431.14	-0.21849	0.0702944	-3.10822	0.00188221	0.0545758	Shc2
ENSMUSG00000020315	ENSMUSG00000020315.18	4958.32	0.00614905	0.0833568	0.0737678	0.941195	0.988214	Sptbn1
ENSMUSG00000020319	ENSMUSG00000020319.9	748.249	0.307627	0.129665	2.37247	0.0176694	0.207742	Wdpcp
ENSMUSG00000020321	ENSMUSG00000020321.15	25406.1	0.537281	0.0860663	6.24264	4.3e-10	5.75e-07	Mdh1
ENSMUSG00000020325	ENSMUSG00000020325.10	138.019	0.165117	0.116877	1.41275	0.15773	0.596629	Fstl3
ENSMUSG00000020326	ENSMUSG00000020326.7	2679.14	-0.266068	0.0965812	-2.75486	0.00587165	0.114003	Ccng1
ENSMUSG00000020328	ENSMUSG00000020328.10	1647.45	0.0608353	0.0731553	0.831591	0.40564	0.80178	Nudcd2
ENSMUSG00000020329	ENSMUSG00000020329.12	893.362	0.10964	0.123046	0.891052	0.372901	0.786707	Polrmt
ENSMUSG00000020330	ENSMUSG00000020330.16	3925.07	-0.033117	0.10326	-0.320716	0.748426	0.94212	Hmmr
ENSMUSG00000020331	ENSMUSG00000020331.9	2761.21	0.0578902	0.113541	0.509861	0.610149	0.904227	Hcn2
ENSMUSG00000020333	ENSMUSG00000020333.17	390.26	-0.150034	0.111146	-1.34987	0.177056	0.619699	Acsl6
ENSMUSG00000020340	ENSMUSG00000020340.16	17050.2	0.00925109	0.10842	0.0853266	0.932002	0.986608	Cyfip2
ENSMUSG00000020346	ENSMUSG00000020346.16	1221.34	0.0770817	0.0885008	0.870973	0.383769	0.790851	Mgat1
ENSMUSG00000020349	ENSMUSG00000020349.4	8794.24	0.0683594	0.0568482	1.20249	0.229174	0.679391	Ppp2ca
ENSMUSG00000020358	ENSMUSG00000020358.17	13908.4	-0.0578257	0.0587698	-0.983936	0.325147	0.754238	Hnrnpab
ENSMUSG00000020359	ENSMUSG00000020359.13	615.841	0.0134346	0.0928582	0.144678	0.884965	0.977581	Phykpl
ENSMUSG00000020361	ENSMUSG00000020361.13	6988.96	0.18541	0.0590013	3.14248	0.00167524	0.0510607	Hspa4
ENSMUSG00000020362	ENSMUSG00000020362.13	3534.84	-0.268156	0.106339	-2.5217	0.0116789	0.167682	Cnot6
ENSMUSG00000020364	ENSMUSG00000020364.14	187.345	0.060039	0.139522	0.430318	0.666964	0.925067	Zfp354a
ENSMUSG00000020366	ENSMUSG00000020366.18	1872.51	0.117269	0.0987642	1.18737	0.235083	0.683418	Mapk9
ENSMUSG00000020368	ENSMUSG00000020368.15	18305.1	0.115728	0.116055	0.997188	0.318673	0.75032	Canx
ENSMUSG00000020372	ENSMUSG00000020372.15	19690.4	0.139159	0.106398	1.30791	0.190903	0.638189	Rack1
ENSMUSG00000020374	ENSMUSG00000020374.16	198.824	0.392403	0.130897	2.99781	0.0027193	0.0711329	Rasgef1c
ENSMUSG00000020375	ENSMUSG00000020375.9	1054.57	-0.203166	0.091852	-2.21188	0.0269747	0.262366	Rufy1
ENSMUSG00000020376	ENSMUSG00000020376.16	5684.26	0.0217547	0.101234	0.214895	0.829849	0.963218	Rnf130
ENSMUSG00000020380	ENSMUSG00000020380.16	1139.57	0.0646676	0.104647	0.61796	0.536602	0.872917	Rad50
ENSMUSG00000020381	ENSMUSG00000020381.10	348.482	0.0483616	0.117083	0.413053	0.679568	0.928688	Mrnip
ENSMUSG00000020385	ENSMUSG00000020385.16	1499.8	0.00362275	0.115295	0.0314217	0.974933	0.996035	Clk4
ENSMUSG00000020386	ENSMUSG00000020386.5	2552.23	0.0797761	0.0659629	1.20941	0.226506	0.675764	Sar1b
ENSMUSG00000020387	ENSMUSG00000020387.15	1225.51	-0.20925	0.0981987	-2.13089	0.0330984	0.291838	Jade2
ENSMUSG00000020389	ENSMUSG00000020389.19	126.185	0.197793	0.145147	1.36271	0.172974	0.614933	Cdkl3
ENSMUSG00000020390	ENSMUSG00000020390.12	4207.59	0.010314	0.0929834	0.110923	0.911677	0.983954	Ube2b
ENSMUSG00000020392	ENSMUSG00000020392.8	2706.24	-0.0682399	0.0721603	-0.945671	0.344316	0.766294	Cdkn2aipnl
ENSMUSG00000020393	ENSMUSG00000020393.16	491.014	0.079268	0.0896989	0.883712	0.376852	0.788552	Kremen1
ENSMUSG00000020396	ENSMUSG00000020396.8	1367.95	-0.166925	0.104836	-1.59224	0.111331	0.515827	Nefh
ENSMUSG00000020397	ENSMUSG00000020397.15	1093.69	0.0653332	0.0708319	0.92237	0.356335	0.774872	Med7
ENSMUSG00000020400	ENSMUSG00000020400.17	1503.75	0.0509433	0.111743	0.455897	0.648464	0.918363	Tnip1
ENSMUSG00000020402	ENSMUSG00000020402.11	9586.77	0.0629981	0.0764783	0.823739	0.410088	0.803289	Vdac1
ENSMUSG00000020407	ENSMUSG00000020407.13	600.709	0.501269	0.104853	4.78067	1.75e-06	0.000432469	Upp1
ENSMUSG00000020409	ENSMUSG00000020409.10	1410.36	-0.0874421	0.0890748	-0.981671	0.326262	0.754362	Slu7
ENSMUSG00000020412	ENSMUSG00000020412.16	1786.95	0.0576137	0.0765731	0.752402	0.451809	0.827017	Ascc2
ENSMUSG00000020413	ENSMUSG00000020413.11	579.355	0.136566	0.101786	1.3417	0.179693	0.623888	Hus1
ENSMUSG00000020415	ENSMUSG00000020415.16	372.616	0.0315417	0.0932303	0.33832	0.735122	0.938791	Pttg1
ENSMUSG00000020420	ENSMUSG00000020420.8	84.0008	-0.0452451	0.128146	-0.353073	0.724034	0.937852	Zfp607a
ENSMUSG00000020422	ENSMUSG00000020422.13	2918.56	0.358905	0.119507	3.0032	0.00267154	0.0704348	Tns3
ENSMUSG00000020423	ENSMUSG00000020423.6	2473.32	-0.227033	0.134519	-1.68774	0.0914605	0.474778	Btg2
ENSMUSG00000020430	ENSMUSG00000020430.12	1921.31	0.06055	0.0733898	0.825047	0.409345	0.803007	Pes1
ENSMUSG00000020431	ENSMUSG00000020431.5	1460.74	-0.151189	0.142587	-1.06033	0.288996	0.728677	Adcy1
ENSMUSG00000020432	ENSMUSG00000020432.12	1698.42	-0.0355681	0.117313	-0.303191	0.761744	0.94648	Tcn2
ENSMUSG00000020435	ENSMUSG00000020435.17	236.755	0.0989941	0.124527	0.794963	0.426635	0.81459	Osbp2
ENSMUSG00000020436	ENSMUSG00000020436.17	251.569	0.0569214	0.141527	0.402196	0.68754	0.931173	Gabrg2
ENSMUSG00000020439	ENSMUSG00000020439.17	1192.39	0.162367	0.072408	2.24238	0.0249365	0.252067	Smtn
ENSMUSG00000020440	ENSMUSG00000020440.13	6700.91	-0.0930791	0.0887768	-1.04846	0.294426	0.733828	Arf5
ENSMUSG00000020441	ENSMUSG00000020441.6	518.669	0.0345179	0.121817	0.283359	0.776902	0.950382	2310033P09Rik
ENSMUSG00000020444	ENSMUSG00000020444.19	2915.68	0.064083	0.119922	0.534372	0.593084	0.895885	Guk1
ENSMUSG00000020448	ENSMUSG00000020448.16	1211.81	-0.0318104	0.115103	-0.276365	0.782267	0.951982	Rnf185
ENSMUSG00000020451	ENSMUSG00000020451.17	1232.94	0.0837458	0.0855543	0.978862	0.327648	0.754804	Limk2
ENSMUSG00000020453	ENSMUSG00000020453.17	1035.12	-0.0929657	0.0917019	-1.01378	0.310687	0.744847	Patz1
ENSMUSG00000020454	ENSMUSG00000020454.17	2196.79	0.0758439	0.096651	0.78472	0.432618	0.81678	Eif4enif1
ENSMUSG00000020455	ENSMUSG00000020455.16	739.241	-0.101564	0.0690095	-1.47174	0.14109	0.57119	Trim11
ENSMUSG00000020456	ENSMUSG00000020456.17	8473.5	0.142566	0.0843591	1.68999	0.0910304	0.474409	Ogdh
ENSMUSG00000020457	ENSMUSG00000020457.13	3644.51	0.0398436	0.0868479	0.458775	0.646396	0.916848	Drg1
ENSMUSG00000020458	ENSMUSG00000020458.16	9985.25	0.0459869	0.0702718	0.654415	0.512844	0.861822	Rtn4
ENSMUSG00000020459	ENSMUSG00000020459.14	1166.27	0.0276966	0.0730585	0.379102	0.704612	0.93471	Mtif2
ENSMUSG00000020460	ENSMUSG00000020460.15	14327.9	0.228558	0.103702	2.20399	0.027525	0.264886	Rps27a
ENSMUSG00000020462	ENSMUSG00000020462.14	2479.83	0.0705509	0.0885088	0.797106	0.425389	0.814522	Cfap36
ENSMUSG00000020463	ENSMUSG00000020463.15	2066.34	0.157229	0.0792727	1.9834	0.0473229	0.350452	Ppp4r3b
ENSMUSG00000020464	ENSMUSG00000020464.15	1053.91	0.0633701	0.0637838	0.993514	0.32046	0.750867	Pnpt1
ENSMUSG00000020471	ENSMUSG00000020471.11	2548.59	0.0855424	0.103795	0.824151	0.409854	0.803066	Pold2
ENSMUSG00000020472	ENSMUSG00000020472.14	1625.08	-0.179115	0.121793	-1.47065	0.141385	0.571236	Zkscan17
ENSMUSG00000020473	ENSMUSG00000020473.13	141.34	-0.0266109	0.141823	-0.187635	0.851163	0.969606	Aebp1
ENSMUSG00000020474	ENSMUSG00000020474.11	641.313	-0.139555	0.0984779	-1.41712	0.156448	0.595338	Polm
ENSMUSG00000020475	ENSMUSG00000020475.3	69.2237	0.0527904	0.144645	0.364966	0.715137	0.935647	Pgam2
ENSMUSG00000020476	ENSMUSG00000020476.14	4440.04	0.182839	0.10105	1.80939	0.0703904	0.424337	Dbnl
ENSMUSG00000020477	ENSMUSG00000020477.10	904.437	0.065809	0.10714	0.614232	0.539062	0.873794	Mrps24
ENSMUSG00000020482	ENSMUSG00000020482.4	1026.55	-0.115958	0.139804	-0.829435	0.406858	0.801957	Ccdc117
ENSMUSG00000020483	ENSMUSG00000020483.14	7272.61	-0.016948	0.0694925	-0.243883	0.807321	0.958353	Dynll2
ENSMUSG00000020484	ENSMUSG00000020484.18	9604.11	0.00250888	0.11151	0.022499	0.98205	0.997345	Xbp1
ENSMUSG00000020485	ENSMUSG00000020485.14	634.635	-0.0233248	0.111355	-0.209463	0.834087	0.964464	Supt4a
ENSMUSG00000020486	ENSMUSG00000020486.18	45.2822	-0.0570223	0.145901	-0.390828	0.695924	0.933215	2004-09-01
ENSMUSG00000020490	ENSMUSG00000020490.16	42.9956	0.0710649	0.143547	0.495065	0.620555	0.907795	Btnl10
ENSMUSG00000020491	ENSMUSG00000020491.15	260.015	-0.0482349	0.118042	-0.408626	0.682814	0.930301	2810021J22Rik
ENSMUSG00000020492	ENSMUSG00000020492.11	1790.53	0.127352	0.0930507	1.36863	0.171116	0.612397	Ska2
ENSMUSG00000020493	ENSMUSG00000020493.8	1068.22	-0.0931716	0.0877424	-1.06188	0.288291	0.728621	Prr11
ENSMUSG00000020495	ENSMUSG00000020495.13	659.825	0.213005	0.079376	2.6835	0.00728561	0.129569	Smg8
ENSMUSG00000020496	ENSMUSG00000020496.9	7466.23	-0.00741391	0.104667	-0.0708335	0.94353	0.989095	Rnf187
ENSMUSG00000020513	ENSMUSG00000020513.15	328.307	0.100747	0.0916751	1.09896	0.271785	0.714919	Tubd1
ENSMUSG00000020514	ENSMUSG00000020514.8	544.21	0.00469028	0.109119	0.0429833	0.965715	0.994842	Mrpl22
ENSMUSG00000020515	ENSMUSG00000020515.13	1303.38	-0.13872	0.0804563	-1.72417	0.0846775	0.459368	Cnot8
ENSMUSG00000020516	ENSMUSG00000020516.15	1476.32	0.0508496	0.0880082	0.577783	0.563411	0.885388	Rps6kb1
ENSMUSG00000020519	ENSMUSG00000020519.5	440.65	-0.0413354	0.131557	-0.314202	0.753367	0.943881	Sap30l
ENSMUSG00000020520	ENSMUSG00000020520.14	1351.43	0.0256577	0.062731	0.409011	0.682532	0.9302	Galnt10
ENSMUSG00000020521	ENSMUSG00000020521.7	499.494	-0.131022	0.135769	-0.965036	0.334527	0.759008	Rnft1
ENSMUSG00000020522	ENSMUSG00000020522.13	1380.86	-0.0814682	0.0843398	-0.965952	0.334068	0.759008	Mfap3
ENSMUSG00000020523	ENSMUSG00000020523.14	2130.82	-0.231062	0.0996326	-2.31914	0.0203877	0.225784	Fam114a2
ENSMUSG00000020525	ENSMUSG00000020525.17	1339.46	0.0663557	0.121922	0.544246	0.586272	0.894128	Ppm1d
ENSMUSG00000020526	ENSMUSG00000020526.12	600.642	0.0999632	0.0942024	1.06115	0.28862	0.728621	Znhit3
ENSMUSG00000020527	ENSMUSG00000020527.14	502.658	-0.0417117	0.0853142	-0.488919	0.624899	0.908091	Myo19
ENSMUSG00000020528	ENSMUSG00000020528.14	1311.7	0.0785521	0.116037	0.676958	0.498433	0.85402	Prpsap2
ENSMUSG00000020530	ENSMUSG00000020530.14	2959.7	0.000652655	0.0632061	0.0103258	0.991761	0.998539	Ggnbp2
ENSMUSG00000020532	ENSMUSG00000020532.18	2332.69	0.196102	0.125778	1.55911	0.118971	0.529565	Acaca
ENSMUSG00000020534	ENSMUSG00000020534.14	1432.73	0.0518146	0.0945272	0.548145	0.583592	0.892957	Shmt1
ENSMUSG00000020536	ENSMUSG00000020536.12	1226.05	-0.143381	0.112882	-1.27018	0.20402	0.652112	Llgl1
ENSMUSG00000020537	ENSMUSG00000020537.9	2664.05	0.119941	0.0741384	1.6178	0.105705	0.504407	Drg2
ENSMUSG00000020538	ENSMUSG00000020538.15	9238.28	0.0088567	0.130423	0.0679075	0.945859	0.989708	Srebf1
ENSMUSG00000020541	ENSMUSG00000020541.12	681.888	-0.010904	0.117346	-0.0929223	0.925965	0.985705	Tom1l1
ENSMUSG00000020544	ENSMUSG00000020544.14	389.674	0.205713	0.0918526	2.2396	0.0251166	0.253002	Cox11
ENSMUSG00000020546	ENSMUSG00000020546.14	449.781	0.117419	0.10111	1.16129	0.245523	0.693666	Stxbp4
ENSMUSG00000020547	ENSMUSG00000020547.4	1329.62	-0.0990329	0.0601707	-1.64587	0.0997914	0.492764	Bzw2
ENSMUSG00000020549	ENSMUSG00000020549.14	1052.12	0.0200047	0.082051	0.243808	0.807379	0.958353	Elac2
ENSMUSG00000020553	ENSMUSG00000020553.8	133.868	-0.278121	0.137459	-2.02329	0.0430429	0.335093	Pctp
ENSMUSG00000020561	ENSMUSG00000020561.7	440.152	-0.273109	0.082584	-3.30705	0.000942857	0.035987	Twistnb
ENSMUSG00000020564	ENSMUSG00000020564.16	223.648	-0.0313639	0.116921	-0.268248	0.788508	0.95434	Atxn7l1
ENSMUSG00000020570	ENSMUSG00000020570.14	1276.97	0.264734	0.0786037	3.36795	0.000757283	0.030956	Sypl
ENSMUSG00000020571	ENSMUSG00000020571.12	22238.9	0.148767	0.110481	1.34654	0.178129	0.621199	Pdia6
ENSMUSG00000020572	ENSMUSG00000020572.7	3499.27	-0.00672067	0.143866	-0.0467149	0.96274	0.994289	Nampt
ENSMUSG00000020573	ENSMUSG00000020573.16	150.194	0.196565	0.144444	1.36084	0.173566	0.615486	Pik3cg
ENSMUSG00000020576	ENSMUSG00000020576.9	2243.46	0.0155393	0.0990127	0.156942	0.875291	0.97593	Nbas
ENSMUSG00000020577	ENSMUSG00000020577.15	12972.9	0.0816468	0.0958218	0.852069	0.394176	0.796246	Tspan13
ENSMUSG00000020580	ENSMUSG00000020580.9	2838.68	0.0232663	0.09644	0.241251	0.80936	0.958353	Rock2
ENSMUSG00000020585	ENSMUSG00000020585.4	8427.18	-0.00594425	0.0792884	-0.07497	0.940239	0.988086	Laptm4a
ENSMUSG00000020589	ENSMUSG00000020589.16	559.755	0.106542	0.0945718	1.12658	0.259922	0.704211	Fam49a
ENSMUSG00000020590	ENSMUSG00000020590.15	1925.54	0.0177646	0.0915782	0.193982	0.84619	0.968351	Snx13
ENSMUSG00000020592	ENSMUSG00000020592.14	905.841	-0.179014	0.0882332	-2.02887	0.0424715	0.333069	Sdc1
ENSMUSG00000020593	ENSMUSG00000020593.14	1066.59	0.146387	0.146002	1.00263	0.316037	0.748886	Lpin1
ENSMUSG00000020594	ENSMUSG00000020594.14	5478.54	0.0366371	0.0946949	0.386896	0.698833	0.933914	Pum2
ENSMUSG00000020598	ENSMUSG00000020598.15	7373.69	0.145663	0.140811	1.03445	0.300924	0.739127	Nrcam
ENSMUSG00000020599	ENSMUSG00000020599.13	2328.53	-0.0482919	0.0963062	-0.501441	0.61606	0.906342	Rgs9
ENSMUSG00000020601	ENSMUSG00000020601.7	1224.52	-0.141778	0.0655938	-2.16146	0.0306598	0.280493	Trib2
ENSMUSG00000020604	ENSMUSG00000020604.13	114.655	-0.150868	0.141833	-1.0637	0.287463	0.727903	Arsg
ENSMUSG00000020605	ENSMUSG00000020605.8	1009.12	-0.142624	0.131532	-1.08433	0.278219	0.720077	Hs1bp3
ENSMUSG00000020607	ENSMUSG00000020607.6	452.547	-0.111692	0.079773	-1.40012	0.161477	0.600934	Fam84a
ENSMUSG00000020608	ENSMUSG00000020608.6	3964.17	0.00863759	0.0874032	0.0988247	0.921277	0.985705	Smc6
ENSMUSG00000020609	ENSMUSG00000020609.14	53.4458	-0.0506823	0.0973153	-0.520806	0.602502	0.90005	Apob
ENSMUSG00000020610	ENSMUSG00000020610.16	2321.33	-0.0106955	0.069032	-0.154935	0.876872	0.976193	Amz2
ENSMUSG00000020611	ENSMUSG00000020611.14	2288.33	0.00266224	0.0906237	0.0293769	0.976564	0.996317	Gna13
ENSMUSG00000020612	ENSMUSG00000020612.16	52543	-0.166498	0.0722826	-2.30343	0.0212546	0.231563	Prkar1a
ENSMUSG00000020614	ENSMUSG00000020614.13	1485.55	-0.0385692	0.110845	-0.347955	0.727874	0.938587	Fam20a
ENSMUSG00000020621	ENSMUSG00000020621.5	773.384	-0.0521777	0.077017	-0.677483	0.4981	0.854018	Rdh14
ENSMUSG00000020623	ENSMUSG00000020623.11	286.795	-0.0519939	0.140526	-0.369995	0.711386	0.935647	Map2k6
ENSMUSG00000020627	ENSMUSG00000020627.9	602.937	-0.00602885	0.104114	-0.0579062	0.953823	0.992357	Klhl29
ENSMUSG00000020628	ENSMUSG00000020628.15	1645.58	-0.0339394	0.0726477	-0.467178	0.640373	0.914222	Trappc12
ENSMUSG00000020629	ENSMUSG00000020629.12	5217.74	0.117299	0.0844204	1.38947	0.164691	0.603971	Adi1
ENSMUSG00000020630	ENSMUSG00000020630.8	523.274	-0.142776	0.0969669	-1.47242	0.140908	0.571183	Rnaseh1
ENSMUSG00000020634	ENSMUSG00000020634.12	1275.77	-0.108027	0.0944346	-1.14394	0.252649	0.698438	Ubxn2a
ENSMUSG00000020635	ENSMUSG00000020635.7	920.234	0.131125	0.103306	1.26928	0.20434	0.652499	Fkbp1b
ENSMUSG00000020638	ENSMUSG00000020638.7	986.717	-0.088306	0.129382	-0.682523	0.494908	0.853343	Cmpk2
ENSMUSG00000020640	ENSMUSG00000020640.9	974.407	-0.196353	0.115937	-1.69361	0.0903387	0.473154	Itsn2
ENSMUSG00000020641	ENSMUSG00000020641.15	113.803	-0.0329921	0.113228	-0.291378	0.770762	0.949297	Rsad2
ENSMUSG00000020642	ENSMUSG00000020642.12	124.687	-0.262831	0.144069	-1.82435	0.0680997	0.419228	Rnf144a
ENSMUSG00000020644	ENSMUSG00000020644.8	4537.47	0.0804172	0.138358	0.581224	0.561089	0.884506	Id2
ENSMUSG00000020646	ENSMUSG00000020646.16	1606.4	0.203372	0.0722295	2.81563	0.00486816	0.10213	Mboat2
ENSMUSG00000020647	ENSMUSG00000020647.9	1382.17	-0.0200963	0.0885512	-0.226946	0.820466	0.960432	Ncoa1
ENSMUSG00000020648	ENSMUSG00000020648.2	130.385	0.104568	0.131732	0.793797	0.427313	0.81459	Dus4l
ENSMUSG00000020649	ENSMUSG00000020649.11	4734.5	-0.109417	0.0865008	-1.26493	0.205896	0.653818	Rrm2
ENSMUSG00000020650	ENSMUSG00000020650.14	458.179	-0.0758116	0.127738	-0.593491	0.552852	0.880913	Bcap29
ENSMUSG00000020652	ENSMUSG00000020652.17	536.192	0.117335	0.0828214	1.41672	0.156564	0.595338	Cenpo
ENSMUSG00000020653	ENSMUSG00000020653.11	343.089	-0.231105	0.0858931	-2.69061	0.00713221	0.128019	Klf11
ENSMUSG00000020654	ENSMUSG00000020654.15	67.6003	-0.13829	0.145332	-0.951546	0.341327	0.763927	Adcy3
ENSMUSG00000020656	ENSMUSG00000020656.15	538.133	0.126715	0.135428	0.935661	0.349448	0.771314	Grhl1
ENSMUSG00000020657	ENSMUSG00000020657.15	1201.44	-0.127852	0.0823678	-1.55221	0.120613	0.533406	Dnajc27
ENSMUSG00000020658	ENSMUSG00000020658.9	1677.25	0.0214675	0.115811	0.185366	0.852942	0.969826	Efr3b
ENSMUSG00000020659	ENSMUSG00000020659.15	818.866	-0.0263716	0.106679	-0.247206	0.804749	0.957462	Cbll1
ENSMUSG00000020660	ENSMUSG00000020660.5	118.122	-0.109578	0.130452	-0.839983	0.400918	0.79975	Pomc
ENSMUSG00000020661	ENSMUSG00000020661.15	5946.4	0.135135	0.117617	1.14893	0.250584	0.697484	Dnmt3a
ENSMUSG00000020664	ENSMUSG00000020664.9	3960.32	0.0663088	0.0544566	1.21765	0.223359	0.673502	Dld
ENSMUSG00000020668	ENSMUSG00000020668.9	952.864	0.421018	0.0776656	5.42091	5.93e-08	3.6e-05	Kif3c
ENSMUSG00000020669	ENSMUSG00000020669.15	501.066	0.0813903	0.106295	0.765705	0.443852	0.823109	Sh3yl1
ENSMUSG00000020671	ENSMUSG00000020671.8	4874.75	0.158823	0.0655681	2.42226	0.0154243	0.194359	Rab10
ENSMUSG00000020672	ENSMUSG00000020672.13	84.1544	0.00967883	0.145791	0.0663884	0.947069	0.990336	Sntg2
ENSMUSG00000020674	ENSMUSG00000020674.16	1362.94	-0.361271	0.127953	-2.82347	0.00475063	0.101279	Pxdn
ENSMUSG00000020677	ENSMUSG00000020677.7	1461.96	-0.0876447	0.0820255	-1.06851	0.285292	0.725911	Ddx52
ENSMUSG00000020680	ENSMUSG00000020680.15	2276.56	-0.0422943	0.0941546	-0.4492	0.653287	0.919812	Taf15
ENSMUSG00000020681	ENSMUSG00000020681.14	107.894	0.271585	0.133826	2.02939	0.0424183	0.333069	Ace
ENSMUSG00000020684	ENSMUSG00000020684.14	386.958	-0.11455	0.142565	-0.803497	0.421688	0.812204	Rasl10b
ENSMUSG00000020687	ENSMUSG00000020687.13	1910.93	0.0326133	0.0889149	0.366792	0.713774	0.935647	Cdc27
ENSMUSG00000020691	ENSMUSG00000020691.13	311.665	-0.0738543	0.0957282	-0.7715	0.440411	0.821186	Mettl2
ENSMUSG00000020692	ENSMUSG00000020692.14	334.545	-0.167624	0.102427	-1.63652	0.101732	0.497207	Nle1
ENSMUSG00000020694	ENSMUSG00000020694.16	1526.49	-0.0173899	0.0583906	-0.29782	0.76584	0.947876	Tlk2
ENSMUSG00000020695	ENSMUSG00000020695.14	848.335	-0.114107	0.129297	-0.882521	0.377495	0.788723	Mrc2
ENSMUSG00000020696	ENSMUSG00000020696.18	135.836	0.0889219	0.123646	0.719163	0.472041	0.841375	Rffl
ENSMUSG00000020697	ENSMUSG00000020697.16	891.415	-0.0609603	0.09953	-0.612482	0.540219	0.873794	Lig3
ENSMUSG00000020700	ENSMUSG00000020700.11	902.609	0.178888	0.118766	1.50621	0.132012	0.554559	Map3k3
ENSMUSG00000020703	ENSMUSG00000020703.3	54.1494	0.01893	0.142371	0.132962	0.894223	0.979691	5530401A14Rik
ENSMUSG00000020704	ENSMUSG00000020704.13	67.1453	-0.456874	0.139028	-3.2862	0.00101549	0.0369505	Asic2
ENSMUSG00000020705	ENSMUSG00000020705.6	2753.36	-0.0365843	0.0713111	-0.513024	0.607935	0.903741	Ddx42
ENSMUSG00000020706	ENSMUSG00000020706.13	1998.85	0.285216	0.0801455	3.55873	0.000372657	0.0196115	Ftsj3
ENSMUSG00000020707	ENSMUSG00000020707.6	188.516	-0.140168	0.1153	-1.21568	0.224106	0.673874	Rnf135
ENSMUSG00000020708	ENSMUSG00000020708.12	5653.17	0.180431	0.0837544	2.15428	0.0312179	0.283485	Psmc5
ENSMUSG00000020715	ENSMUSG00000020715.9	7079.53	-0.0470154	0.138491	-0.339484	0.734245	0.938791	Ern1
ENSMUSG00000020716	ENSMUSG00000020716.15	1569.97	-0.0745335	0.0849928	-0.876939	0.38052	0.79028	Nf1
ENSMUSG00000020718	ENSMUSG00000020718.12	170.891	0.00886524	0.116062	0.0763835	0.939114	0.987897	Polg2
ENSMUSG00000020719	ENSMUSG00000020719.14	30143.2	-0.0811773	0.0757616	-1.07148	0.283952	0.725004	Ddx5
ENSMUSG00000020720	ENSMUSG00000020720.13	3010.55	0.0970593	0.073733	1.31636	0.188053	0.635585	Psmd12
[truncated: 11,358 more rows]

## Sheet: Results_allgenes_RIP-RNAseq
Supplemental Table 1. RIP-RNA. Fold change in Ago2-imunoprecipitates of MIN6 cells transfected with miR-125b mimics vs control for all detected genes
Gene.stable.ID	Gene.name	baseMean	log2FoldChange	lfcSE	stat	pvalue	padj
ENSMUSG00000031985	Gnpat	1437.6	1.05902	0.100019	10.5882	3.38e-26	4.92e-23
ENSMUSG00000007458	M6pr	754.046	1.02729	0.112478	9.13321	6.65e-20	6.46e-17
ENSMUSG00000056596	Trnp1	290.44	1.01735	0.141537	7.18783	6.58e-13	5.48e-10
ENSMUSG00000025733	Rhot2	263.288	0.978498	0.140125	6.98305	2.89e-12	2.1e-09
ENSMUSG00000004748	Mtfp1	132.915	0.908711	0.150087	6.05455	1.41e-09	5.86e-07
ENSMUSG00000020444	Guk1	159.037	0.892965	0.150834	5.92018	3.22e-09	1.17e-06
ENSMUSG00000033955	Tnks1bp1	127.613	0.884793	0.170131	5.20066	1.99e-07	4.63e-05
ENSMUSG00000062997	Rpl35	149.55	0.883606	0.159526	5.53894	3.04e-08	8.44e-06
ENSMUSG00000020953	Coch	105.263	0.878482	0.174359	5.03834	4.7e-07	9.43e-05
ENSMUSG00000005373	Mlxipl	545.339	0.868155	0.133974	6.48005	9.17e-11	5.34e-08
ENSMUSG00000039108	Lsm14b	219.679	0.850769	0.136314	6.24123	4.34e-10	2.11e-07
ENSMUSG00000009563	Tor2a	306.406	0.794265	0.135288	5.8709	4.33e-09	1.4e-06
ENSMUSG00000079508	Apoo	126.262	0.753448	0.179958	4.1868	2.83e-05	0.00306944
ENSMUSG00000029462	Vps29	202.799	0.724497	0.140498	5.15663	2.51e-07	5.58e-05
ENSMUSG00000017132	Cyth1	366.613	0.722428	0.128595	5.61786	1.93e-08	5.63e-06
ENSMUSG00000032249	Anp32a	266.492	0.714896	0.135994	5.25681	1.47e-07	3.71e-05
ENSMUSG00000087598	Zfp111	129.896	0.696479	0.162339	4.29028	1.78e-05	0.0023103
ENSMUSG00000030083	Abtb1	219.715	0.692767	0.145582	4.75861	1.95e-06	0.000344135
ENSMUSG00000032528	Vipr1	924.315	0.690911	0.116048	5.95368	2.62e-09	1.02e-06
ENSMUSG00000015363	Trabd	349.067	0.677609	0.14027	4.83076	1.36e-06	0.000247626
ENSMUSG00000024807	Syvn1	1296.56	0.673522	0.0996919	6.75604	1.42e-11	9.18e-09
ENSMUSG00000022452	Smdt1	166.895	0.668223	0.152262	4.38863	1.14e-05	0.0016614
ENSMUSG00000043445	Pgp	175.115	0.656402	0.150509	4.36121	1.29e-05	0.0017942
ENSMUSG00000062300	Nectin2	122.653	0.648825	0.152034	4.26764	1.98e-05	0.00244876
ENSMUSG00000041846	Ppp4r3a	369.522	0.64717	0.12308	5.25813	1.46e-07	3.71e-05
ENSMUSG00000049659	Aftph	191.188	0.640992	0.146405	4.37821	1.2e-05	0.0017003
ENSMUSG00000005683	Cs	569.625	0.638992	0.110712	5.77165	7.85e-09	2.41e-06
ENSMUSG00000052296	Ppp6r1	485.943	0.636591	0.123793	5.14238	2.71e-07	5.64e-05
ENSMUSG00000034793	G6pc3	112.475	0.605219	0.157476	3.84324	0.000121422	0.0110532
ENSMUSG00000022490	Ppp1r1a	527.975	0.604992	0.136731	4.42469	9.66e-06	0.00144278
ENSMUSG00000041608	Entpd3	1015.97	0.597059	0.137895	4.3298	1.49e-05	0.00202214
ENSMUSG00000015087	Rabl6	325.491	0.590894	0.128416	4.60142	4.2e-06	0.000660746
ENSMUSG00000028670	Lypla2	240.726	0.565481	0.132946	4.25346	2.1e-05	0.00255488
ENSMUSG00000090291	Lrrc10b	177.893	0.560886	0.145333	3.85931	0.000113709	0.010685
ENSMUSG00000038127	Ccdc50	216.813	0.547362	0.145426	3.76384	0.000167321	0.0149971
ENSMUSG00000026113	Inpp4a	253.002	0.546501	0.12945	4.22172	2.42e-05	0.00282493
ENSMUSG00000024908	Ppp6r3	655.511	0.545088	0.116322	4.68604	2.79e-06	0.000463664
ENSMUSG00000018171	Vmp1	229.465	0.54201	0.145128	3.73469	0.000187945	0.0165904
ENSMUSG00000030401	Rtn2	153.981	0.539446	0.147013	3.66936	0.000243154	0.0210045
ENSMUSG00000034928	Rnf44	422.499	0.53858	0.125799	4.28127	1.86e-05	0.00235354
ENSMUSG00000024039	Cbs	332.847	0.535949	0.128048	4.18553	2.85e-05	0.00306944
ENSMUSG00000045287	Rtn4rl1	269.979	0.524582	0.133305	3.9352	8.31e-05	0.00820863
ENSMUSG00000024742	Fen1	259.573	0.518704	0.126043	4.11531	3.87e-05	0.0040226
ENSMUSG00000036817	Sun1	227.912	0.510771	0.1399	3.65097	0.00026125	0.0220586
ENSMUSG00000015806	Qdpr	576.749	0.507709	0.109957	4.61735	3.89e-06	0.000629011
ENSMUSG00000024862	Klc2	222.737	0.505289	0.137784	3.66726	0.000245161	0.0210045
ENSMUSG00000028437	Ubap1	266.827	0.502395	0.143568	3.49934	0.000466412	0.0327387
ENSMUSG00000042745	Id1	154.315	0.500632	0.150656	3.32301	0.000890507	0.0589556
ENSMUSG00000039835	Nhsl1	160.878	0.486726	0.154429	3.15178	0.00162276	0.0936062
ENSMUSG00000036327	Qsox2	478.604	0.485453	0.112346	4.32107	1.55e-05	0.00205599
ENSMUSG00000020135	Apc2	144.348	0.485371	0.145567	3.33434	0.000855014	0.0579222
ENSMUSG00000049339	Retreg2	783.522	0.478059	0.0972897	4.91377	8.93e-07	0.000167903
ENSMUSG00000025192	Entpd7	414.477	0.476204	0.121966	3.90442	9.45e-05	0.00917134
ENSMUSG00000017548	Suz12	694.756	0.47529	0.105198	4.51804	6.24e-06	0.000956933
ENSMUSG00000052915	Msl1	467.997	0.468749	0.111517	4.2034	2.63e-05	0.00300365
ENSMUSG00000038462	Uqcrfs1	220.739	0.459323	0.147712	3.10959	0.0018735	0.0996461
ENSMUSG00000029363	Rfc5	241.136	0.453455	0.144308	3.14227	0.00167644	0.0948247
ENSMUSG00000016128	Stard13	320.833	0.44781	0.127083	3.52375	0.000425484	0.0317804
ENSMUSG00000047547	Cltb	292.537	0.442847	0.125311	3.53398	0.000409348	0.0309722
ENSMUSG00000022752	Tomm70a	340.125	0.442035	0.123962	3.5659	0.000362615	0.0277973
ENSMUSG00000036887	C1qa	282.185	0.438282	0.120994	3.62233	0.000291963	0.0239575
ENSMUSG00000052105	Mtcl1	510.855	0.429293	0.122392	3.50753	0.000452289	0.0325313
ENSMUSG00000003534	Ddr1	340.426	0.428774	0.133473	3.21245	0.0013161	0.0807116
ENSMUSG00000021520	Uqcrb	322.669	0.426007	0.136763	3.11493	0.00183988	0.0992512
ENSMUSG00000032875	Arhgef17	931.88	0.416251	0.107448	3.87398	0.000107074	0.0102264
ENSMUSG00000004934	Pias4	366.695	0.413234	0.118034	3.50097	0.000463571	0.0327387
ENSMUSG00000020362	Cnot6	1217.67	0.393472	0.0984168	3.99802	6.39e-05	0.0064161
ENSMUSG00000038312	Edem2	416.793	0.391188	0.111261	3.51595	0.000438187	0.031911
ENSMUSG00000020847	Rph3al	339.207	0.385371	0.119783	3.21723	0.00129436	0.0802225
ENSMUSG00000059263	Usp47	577.217	0.379106	0.115106	3.29352	0.000989398	0.0641307
ENSMUSG00000020827	Mink1	385.697	0.374152	0.117924	3.17283	0.00150959	0.0906687
ENSMUSG00000030872	Gga2	840.733	0.373156	0.111776	3.33844	0.00084251	0.0577466
ENSMUSG00000020571	Pdia6	1708.66	0.371632	0.0966443	3.84536	0.000120374	0.0110532
ENSMUSG00000003500	Impdh1	326.02	0.367106	0.117731	3.11817	0.00181979	0.0990852
ENSMUSG00000020538	Srebf1	1355.37	0.354139	0.108069	3.27696	0.00104931	0.067179
ENSMUSG00000046691	Chtf8	432.86	0.351151	0.111889	3.13839	0.00169877	0.0951637
ENSMUSG00000031144	Syp	1472.76	0.321854	0.101639	3.16663	0.00154218	0.0916808
ENSMUSG00000027893	Ahcyl1	1581.99	0.302386	0.0972823	3.10834	0.00188141	0.0996461
ENSMUSG00000031327	Chic1	3449.68	-0.378258	0.105029	-3.60145	0.000316444	0.0252548
ENSMUSG00000020372	Rack1	457.578	-0.380571	0.120905	-3.1477	0.00164563	0.0939944
ENSMUSG00000020422	Tns3	1367.26	-0.398007	0.113186	-3.5164	0.000437434	0.031911
ENSMUSG00000028382	Ptbp3	779.15	-0.421168	0.128874	-3.26807	0.00108284	0.0685719
ENSMUSG00000064373	Selenop	531.059	-0.43442	0.108649	-3.99839	6.38e-05	0.0064161
ENSMUSG00000029686	Cul1	217.405	-0.4409	0.139827	-3.15319	0.00161495	0.0936062
ENSMUSG00000031765	Mt1	1124.59	-0.446417	0.124585	-3.58324	0.000339352	0.0267171
ENSMUSG00000033623	Pcgf3	291.457	-0.446584	0.123764	-3.60835	0.000308153	0.0249347
ENSMUSG00000031731	Ap1g1	488.812	-0.448828	0.14315	-3.13538	0.00171633	0.0952316
ENSMUSG00000058254	Tspan7	549.643	-0.449374	0.125805	-3.57199	0.000354273	0.0275199
ENSMUSG00000032405	Pias1	284.5	-0.457485	0.143562	-3.18668	0.00143917	0.0873393
ENSMUSG00000019843	Fyn	178.858	-0.457963	0.146273	-3.13088	0.00174281	0.0957891
ENSMUSG00000018698	Lhx1	379.083	-0.462883	0.136731	-3.38535	0.000710886	0.049305
ENSMUSG00000024608	Rps14	254.98	-0.465557	0.141371	-3.29316	0.00099069	0.0641307
ENSMUSG00000026600	Soat1	379.07	-0.47516	0.130518	-3.64058	0.000272027	0.0226404
ENSMUSG00000054414	Slc30a7	274.651	-0.517009	0.15525	-3.33017	0.000867918	0.0581205
ENSMUSG00000075031	Hist1h2bb	150.272	-0.525136	0.16603	-3.16289	0.0015621	0.0919272
ENSMUSG00000038346	Zfp384	145.124	-0.527761	0.162607	-3.24562	0.00117196	0.0734174
ENSMUSG00000005232	G6pc2	5867.68	-0.540404	0.129018	-4.18859	2.81e-05	0.00306944
ENSMUSG00000023004	Tuba1b	4043.95	-0.554933	0.106145	-5.22809	1.71e-07	4.16e-05
ENSMUSG00000021474	Sfxn1	257.69	-0.591512	0.141549	-4.17884	2.93e-05	0.0031036
ENSMUSG00000041245	Wnk3	530.744	-0.598521	0.141081	-4.24241	2.21e-05	0.00262927
ENSMUSG00000054752	Fsd1l	224.078	-0.636855	0.134986	-4.71795	2.38e-06	0.000408227
ENSMUSG00000048027	Rgmb	164.579	-0.734646	0.148126	-4.95961	7.06e-07	0.000137174
ENSMUSG00000008682	Rpl10	370.357	-0.829383	0.161005	-5.15128	2.59e-07	5.58e-05
ENSMUSG00000051695	Pcbp1	665.717	-0.847004	0.137312	-6.16847	6.9e-10	3.09e-07
ENSMUSG00000058443	Rpl10-ps3	1365.03	-0.857872	0.137389	-6.24412	4.26e-10	2.11e-07
ENSMUSG00000020644	Id2	195.542	-0.893534	0.151699	-5.89019	3.86e-09	1.32e-06
ENSMUSG00000018567	Gabarap	946.721	-1.34354	0.140239	-9.58033	9.67e-22	1.13e-18
ENSMUSG00000029304	Spp1	548.383	-1.54622	0.140773	-10.9838	4.57e-28	8.88e-25
ENSMUSG00000020775	Mrpl38	199.418	-1.86855	0.151089	-12.3673	3.93e-35	1.14e-31
ENSMUSG00000069682	Gm10275	276.336	-1.88174	0.14226	-13.2274	6.09e-40	3.55e-36
ENSMUSG00000032076	Cadm1	502.861	0.411041	0.132905	3.09273	0.00198322	0.104092
ENSMUSG00000086266	Igf2os	599.389	-0.369058	0.119744	-3.08205	0.00205582	0.106939
ENSMUSG00000039244	E130309D02Rik	130.087	0.473368	0.154017	3.07349	0.00211574	0.109082
ENSMUSG00000028830	AU040320	423.015	0.41809	0.1362	3.06967	0.00214293	0.109515
ENSMUSG00000037461	Ints7	225.796	0.426973	0.13952	3.06029	0.00221125	0.112024
ENSMUSG00000028152	Tspan5	592.826	-0.36966	0.121094	-3.05268	0.00226808	0.113912
ENSMUSG00000022283	Pabpc1	1307.93	-0.33886	0.111515	-3.03868	0.00237617	0.117324
ENSMUSG00000036202	Rif1	358.337	0.459119	0.151092	3.03867	0.00237628	0.117324
ENSMUSG00000038843	Gcnt1	277.655	0.372117	0.122584	3.03561	0.00240048	0.117523
ENSMUSG00000030037	Mrpl53	107.364	0.493852	0.163231	3.02548	0.00248236	0.119523
ENSMUSG00000061315	Naca	298.998	-0.552153	0.182406	-3.02705	0.00246952	0.119523
ENSMUSG00000032238	Rora	200.838	-0.429078	0.142057	-3.02047	0.00252383	0.120523
ENSMUSG00000041681	Iapp	27044.7	-0.358001	0.11871	-3.01577	0.0025633	0.121413
ENSMUSG00000024590	Lmnb1	965.739	0.297335	0.0989714	3.00426	0.00266232	0.124276
ENSMUSG00000026355	Mcm6	637.059	0.371781	0.123771	3.00379	0.0026664	0.124276
ENSMUSG00000044933	Sstr3	631.412	0.325467	0.108699	2.9942	0.00275166	0.127231
ENSMUSG00000021027	Ralgapa1	580.174	-0.374686	0.126196	-2.96909	0.00298684	0.132299
ENSMUSG00000025580	Eif4a3	220.72	0.402286	0.135578	2.96718	0.00300543	0.132299
ENSMUSG00000027200	Sema6d	176.575	-0.488155	0.164263	-2.9718	0.00296064	0.132299
ENSMUSG00000028138	Adh5	119.647	0.453106	0.152257	2.97594	0.00292094	0.132299
ENSMUSG00000028788	Ptp4a2	196.858	-0.442436	0.148818	-2.97299	0.00294912	0.132299
ENSMUSG00000053411	Cbx7	107.322	0.502773	0.168885	2.97702	0.00291065	0.132299
ENSMUSG00000073530	Pappa2	346.315	0.396356	0.133648	2.96567	0.00302021	0.132299
ENSMUSG00000024695	Zfp91	549.914	-0.367875	0.124554	-2.95354	0.00314151	0.136585
ENSMUSG00000022890	Atp5j	434.333	0.457993	0.155882	2.93808	0.00330251	0.142522
ENSMUSG00000064357	mt-Atp6	634.046	-0.379397	0.129517	-2.92933	0.00339691	0.145518
ENSMUSG00000025354	Dnajc14	142.368	0.439463	0.15033	2.92332	0.00346322	0.147275
ENSMUSG00000025223	Ldb1	205.794	-0.419198	0.143555	-2.92013	0.00349891	0.147715
ENSMUSG00000000253	Gmpr	124.434	0.444944	0.152939	2.90928	0.0036226	0.151836
ENSMUSG00000058979	Hdhd5	110.27	0.451661	0.156183	2.89187	0.00382962	0.158237
ENSMUSG00000069094	Pde7a	167.577	0.44372	0.153321	2.89407	0.00380288	0.158237
ENSMUSG00000031668	Eif2ak3	324.324	0.366583	0.127001	2.88645	0.00389609	0.15985
ENSMUSG00000026587	Astn1	313.677	0.428077	0.149114	2.8708	0.0040943	0.166174
ENSMUSG00000039529	Atp8b1	868.145	0.357851	0.124695	2.8698	0.00410728	0.166174
ENSMUSG00000031258	Xkrx	378.103	0.353656	0.123349	2.86712	0.00414229	0.166435
ENSMUSG00000024542	Cep192	250.873	-0.38568	0.135209	-2.85246	0.00433817	0.173111
ENSMUSG00000026463	Atp2b4	262.724	0.513403	0.180294	2.84759	0.00440521	0.173161
ENSMUSG00000030403	Vasp	149.44	0.438874	0.154213	2.8459	0.00442859	0.173161
ENSMUSG00000060152	Pop5	231.554	0.383887	0.134819	2.84742	0.00440751	0.173161
ENSMUSG00000006024	Napa	389.303	0.34039	0.120274	2.83013	0.00465297	0.180721
ENSMUSG00000020788	Atp2a3	2440.05	0.228797	0.0809678	2.82578	0.00471655	0.18078
ENSMUSG00000028367	Txn1	794.807	-0.305342	0.107985	-2.82762	0.00468952	0.18078
ENSMUSG00000033379	Atp6v0b	1090.01	0.265963	0.0942094	2.8231	0.00475615	0.181107
ENSMUSG00000053510	Nrd1	1157.61	-0.277904	0.098893	-2.81015	0.00495189	0.187336
ENSMUSG00000046761	Fam83h	213.709	0.371478	0.132329	2.80724	0.00499676	0.187814
ENSMUSG00000031812	Map1lc3b	225.461	-0.440833	0.157643	-2.79641	0.00516743	0.192983
ENSMUSG00000026064	Ptp4a1	603.915	-0.362441	0.129985	-2.78834	0.00529789	0.196596
ENSMUSG00000017929	B4galt5	302.349	0.338458	0.122095	2.77209	0.00556982	0.205239
ENSMUSG00000034210	Efcab14	231.166	0.414721	0.149705	2.77025	0.00560128	0.205239
ENSMUSG00000021737	Psmd6	248.88	0.345029	0.125041	2.75933	0.00579198	0.2109
ENSMUSG00000052698	Tln2	126.034	0.416906	0.151585	2.75031	0.00595382	0.215447
ENSMUSG00000022898	Dscr3	133.657	-0.432976	0.157716	-2.74529	0.00604583	0.216469
ENSMUSG00000029644	Pdx1	691.421	-0.275326	0.100311	-2.74471	0.00605638	0.216469
ENSMUSG00000007038	Neu1	390.045	0.310349	0.113342	2.73817	0.00617822	0.216631
ENSMUSG00000015599	Ttbk1	288.103	0.338071	0.123647	2.73417	0.00625382	0.216631
ENSMUSG00000022195	6030458C11Rik	273.33	0.348817	0.127433	2.73726	0.00619525	0.216631
ENSMUSG00000040407	Akap9	340.295	0.403752	0.14756	2.73619	0.00621554	0.216631
ENSMUSG00000042428	Mgat3	214.233	0.358558	0.131229	2.73231	0.0062891	0.216631
ENSMUSG00000062785	Kcnc3	241.21	0.351498	0.128296	2.73975	0.00614865	0.216631
ENSMUSG00000075419	Dolk	171.118	0.406715	0.148945	2.73064	0.00632119	0.216631
ENSMUSG00000022811	Zfp148	304.808	-0.419743	0.154294	-2.72041	0.0065202	0.219576
ENSMUSG00000022822	Abcc5	244.772	0.387832	0.142472	2.72216	0.00648567	0.219576
ENSMUSG00000026496	Parp1	695.894	0.283582	0.104109	2.72389	0.00645182	0.219576
ENSMUSG00000074272	Ceacam1	218.809	0.375988	0.138797	2.7089	0.00675066	0.226031
ENSMUSG00000021810	Ecd	129.104	0.417115	0.154255	2.70406	0.00684974	0.228038
ENSMUSG00000024236	Svil	441	-0.297002	0.10999	-2.70027	0.00692825	0.229341
ENSMUSG00000017631	Abr	463.726	0.300095	0.111285	2.69663	0.00700459	0.230558
ENSMUSG00000030729	Pgm2l1	200.908	-0.374801	0.139322	-2.69017	0.00714162	0.233748
ENSMUSG00000002379	Ndufa11	251.749	-0.378934	0.141471	-2.67853	0.00739454	0.238584
ENSMUSG00000020700	Map3k3	401.464	-0.33741	0.126006	-2.67773	0.00741224	0.238584
ENSMUSG00000038518	Jarid2	646.308	0.300526	0.112145	2.6798	0.00736657	0.238584
ENSMUSG00000019578	Ubxn6	132.079	0.426033	0.1597	2.66771	0.00763702	0.244469
ENSMUSG00000040102	Klhl42	338.416	-0.315941	0.118629	-2.66326	0.00773873	0.246371
ENSMUSG00000021589	Rhobtb3	367.357	-0.321589	0.121031	-2.65707	0.00788237	0.248734
ENSMUSG00000024712	Rfk	180.212	-0.399826	0.150926	-2.64916	0.00806913	0.248734
ENSMUSG00000028245	Nsmaf	219.944	0.383349	0.144435	2.65413	0.00795137	0.248734
ENSMUSG00000030284	Creld1	113.093	0.428711	0.161639	2.65227	0.00799533	0.248734
ENSMUSG00000035086	Becn1	242.129	0.357035	0.134653	2.65153	0.00801285	0.248734
ENSMUSG00000071234	Syndig1l	287.87	-0.342862	0.129406	-2.6495	0.00806108	0.248734
ENSMUSG00000031762	Mt2	236.241	-0.422173	0.159506	-2.64676	0.00812674	0.249192
ENSMUSG00000053841	Txlna	336.848	0.342814	0.129753	2.64205	0.00824049	0.251356
ENSMUSG00000009575	Cbx5	4555.25	-0.252819	0.0959067	-2.6361	0.00838658	0.253783
ENSMUSG00000111269	Gm47933	159.457	0.404871	0.153636	2.63527	0.00840715	0.253783
ENSMUSG00000001542	Ell2	132.484	-0.404133	0.154083	-2.62283	0.00872031	0.261879
ENSMUSG00000002820	Atg4d	111.721	0.422219	0.161558	2.61342	0.00896401	0.267121
ENSMUSG00000028559	Osbpl9	151.848	0.393928	0.150782	2.61256	0.00898657	0.267121
ENSMUSG00000031540	Kat6a	362.329	-0.325354	0.124734	-2.60839	0.00909701	0.268011
ENSMUSG00000093752	Gm20716	159.629	-0.436821	0.167496	-2.60795	0.00910851	0.268011
ENSMUSG00000054499	Dedd2	163.284	0.411331	0.158169	2.60058	0.00930662	0.272464
ENSMUSG00000001150	Mcm3ap	219.214	-0.340166	0.130911	-2.59846	0.00936429	0.272782
ENSMUSG00000018340	Anxa6	305.607	-0.3328	0.128286	-2.59421	0.00948089	0.273768
ENSMUSG00000019773	Fbxo5	181.498	-0.364069	0.140569	-2.58998	0.00959826	0.273768
ENSMUSG00000042650	Alkbh5	534.205	0.284015	0.109719	2.58857	0.00963763	0.273768
ENSMUSG00000069892	9930111J21Rik2	104.256	0.407461	0.157433	2.58816	0.00964902	0.273768
ENSMUSG00000081058	Hist2h3c2	231.561	-0.391865	0.151456	-2.58732	0.00967255	0.273768
ENSMUSG00000084416	Rpl10a-ps1	119.856	0.439617	0.16993	2.58705	0.00968007	0.273768
ENSMUSG00000026596	Abl2	270.516	0.372498	0.144281	2.58175	0.00983001	0.276665
ENSMUSG00000023994	Nfya	500.04	0.320315	0.124221	2.57859	0.00992042	0.277629
ENSMUSG00000024063	Lbh	317.246	-0.328344	0.127404	-2.57718	0.009961	0.277629
ENSMUSG00000037266	Rsrp1	392.327	-0.331827	0.128836	-2.57558	0.0100072	0.277629
ENSMUSG00000030062	Rpn1	1303.38	0.288332	0.112201	2.56978	0.0101764	0.280986
ENSMUSG00000030428	Ttyh1	801.495	0.26675	0.104017	2.56447	0.0103333	0.281878
ENSMUSG00000035024	Ncapd3	296.188	-0.349427	0.136259	-2.56442	0.0103348	0.281878
ENSMUSG00000038174	Fam126b	286.699	0.34199	0.133393	2.56378	0.0103539	0.281878
ENSMUSG00000022174	Dad1	586.46	-0.306053	0.119915	-2.55225	0.010703	0.288366
ENSMUSG00000026854	Usp20	234.864	0.348601	0.136735	2.54946	0.0107891	0.288366
ENSMUSG00000050890	Pdik1l	148.567	-0.385982	0.151238	-2.55215	0.0107062	0.288366
ENSMUSG00000105987	AI506816	1328.84	-0.275806	0.108184	-2.54942	0.0107902	0.288366
ENSMUSG00000021242	Npc2	302.935	-0.316632	0.12519	-2.52922	0.0114317	0.294694
ENSMUSG00000024064	Galnt14	246.17	0.343451	0.135492	2.53484	0.0112498	0.294694
ENSMUSG00000029545	Acads	143.385	0.372018	0.146782	2.53449	0.0112611	0.294694
ENSMUSG00000031146	Plp2	878.433	-0.330677	0.130683	-2.53037	0.0113942	0.294694
ENSMUSG00000034297	Med13	458.943	-0.338773	0.133884	-2.53035	0.0113949	0.294694
ENSMUSG00000038056	Kmt2c	705.859	0.285536	0.112701	2.53356	0.0112911	0.294694
ENSMUSG00000046138	9930021J03Rik	157.815	0.401272	0.158564	2.53066	0.0113848	0.294694
ENSMUSG00000021711	Trappc13	143.132	-0.390996	0.155023	-2.52218	0.0116631	0.298252
ENSMUSG00000034701	Neurod1	4183.92	-0.428773	0.170074	-2.52109	0.0116991	0.298252
ENSMUSG00000042744	Hectd4	659.024	-0.30455	0.120835	-2.52037	0.0117233	0.298252
ENSMUSG00000063550	Nup98	798.336	-0.328742	0.130582	-2.51752	0.0118183	0.299363
ENSMUSG00000014602	Kif1a	155.07	0.421353	0.16812	2.50627	0.0122013	0.303532
ENSMUSG00000026037	Orc2	224.495	0.354394	0.141583	2.50309	0.0123115	0.303532
ENSMUSG00000029554	Mad1l1	134.178	0.373713	0.148845	2.51075	0.0120476	0.303532
ENSMUSG00000030516	Tjp1	892.54	-0.248937	0.0993859	-2.50475	0.0122539	0.303532
ENSMUSG00000033953	Ppp3r1	327.617	-0.318433	0.127319	-2.50106	0.0123824	0.303532
ENSMUSG00000100755	Rps23-ps1	141.462	0.367767	0.146662	2.50759	0.0121557	0.303532
ENSMUSG00000105207	Gm42927	825.092	0.413282	0.165276	2.50056	0.0123997	0.303532
ENSMUSG00000105549	Gm43540	248.964	0.408227	0.162792	2.50765	0.0121536	0.303532
ENSMUSG00000048279	Sacs	647.243	-0.270362	0.108186	-2.49904	0.0124531	0.303565
ENSMUSG00000040721	Zfhx2	1291.87	-0.274714	0.110073	-2.49574	0.0125696	0.305126
ENSMUSG00000037805	Rpl10a	241.882	-0.367911	0.147583	-2.49292	0.0126699	0.306285
ENSMUSG00000039509	Nup133	147.093	0.394333	0.158846	2.48249	0.0130468	0.314092
ENSMUSG00000079109	Pms2	137.471	0.380074	0.153651	2.47362	0.0133751	0.320673
ENSMUSG00000025872	Thoc3	113.194	0.419438	0.169727	2.47124	0.0134644	0.32149
ENSMUSG00000027189	Trim44	344.067	0.300507	0.121779	2.46765	0.0136004	0.323412
ENSMUSG00000020857	Nme2	330.14	-0.306114	0.124276	-2.46318	0.0137712	0.324222
ENSMUSG00000028863	Meaf6	120.082	0.416849	0.169128	2.4647	0.013713	0.324222
ENSMUSG00000111472	Gm47103	165.394	0.374405	0.152049	2.46239	0.0138014	0.324222
ENSMUSG00000024182	Axin1	138.107	0.366477	0.149126	2.45749	0.013991	0.326046
ENSMUSG00000027177	Hipk3	1063.01	-0.259699	0.105629	-2.45859	0.0139483	0.326046
ENSMUSG00000018800	Abca5	492.441	-0.329099	0.134134	-2.45351	0.0141468	0.327219
ENSMUSG00000025204	Ndufb8	201.255	0.362959	0.147945	2.45334	0.0141536	0.327219
ENSMUSG00000074934	Grem1	127.745	-0.374885	0.153076	-2.44902	0.0143245	0.329859
ENSMUSG00000020738	Sumo2	618.53	-0.330777	0.135505	-2.44107	0.0146438	0.334706
ENSMUSG00000023075	Akirin1	374.378	0.287066	0.117742	2.4381	0.0147647	0.334706
ENSMUSG00000035804	Ins1	6922.22	-0.210101	0.0861103	-2.43991	0.014691	0.334706
ENSMUSG00000043909	Trp53bp1	251.317	0.336468	0.137993	2.43829	0.0147567	0.334706
ENSMUSG00000024889	Rce1	130.666	0.361266	0.148484	2.43304	0.0149728	0.338107
ENSMUSG00000033653	Vps8	194.104	0.367565	0.151549	2.42538	0.0152922	0.343986
ENSMUSG00000058569	Tmed9	1253.97	0.265853	0.109692	2.42363	0.0153663	0.344323
ENSMUSG00000025903	Lypla1	202.929	0.395965	0.163599	2.42033	0.0155063	0.346129
ENSMUSG00000030557	Mef2a	218.659	0.324727	0.134309	2.41775	0.0156168	0.347265
ENSMUSG00000040860	Crocc	117.918	0.400315	0.16568	2.41619	0.0156838	0.347429
ENSMUSG00000057530	Ece1	4443.55	0.203501	0.0843154	2.41357	0.0157969	0.348609
ENSMUSG00000093942	Olfr46	237.645	0.36168	0.149946	2.41207	0.0158624	0.348733
ENSMUSG00000106948	Gm42785	370.431	0.393723	0.16337	2.41001	0.0159522	0.349388
ENSMUSG00000027002	Nckap1	1319.31	-0.241087	0.100222	-2.40552	0.0161493	0.349761
ENSMUSG00000030091	Nup210	700.711	0.259223	0.107656	2.40787	0.0160458	0.349761
ENSMUSG00000106631	Gm42669	179.66	0.397199	0.165093	2.40591	0.0161322	0.349761
ENSMUSG00000048807	Slc35e4	120.787	0.363902	0.151518	2.4017	0.0163189	0.352126
ENSMUSG00000027630	Tbl1xr1	160.045	0.394849	0.164523	2.39997	0.0163966	0.352496
ENSMUSG00000030243	Recql	113.878	0.40732	0.169841	2.39824	0.016474	0.352858
ENSMUSG00000015501	Hivep2	570.161	-0.317377	0.132673	-2.39217	0.016749	0.35355
ENSMUSG00000029291	Rufy3	194.189	0.325423	0.135911	2.39438	0.0166486	0.35355
ENSMUSG00000039929	Urb1	137.96	0.375237	0.156756	2.39376	0.0166767	0.35355
ENSMUSG00000056602	Fry	241.362	0.346885	0.144969	2.39282	0.0167196	0.35355
ENSMUSG00000070462	Tlnrd1	169.262	0.356768	0.149402	2.38797	0.0169415	0.356322
ENSMUSG00000028495	Rps6	433.333	-0.312604	0.131534	-2.3766	0.0174732	0.366184
ENSMUSG00000039988	Ankrd13c	211.097	0.312284	0.131677	2.37159	0.0177115	0.369847
ENSMUSG00000031242	2610002M06Rik	117.153	-0.402667	0.170143	-2.36665	0.0179501	0.37216
ENSMUSG00000040537	Adam22	344.763	0.310514	0.131199	2.36675	0.0179453	0.37216
ENSMUSG00000031095	Cul4b	137.604	-0.359892	0.152225	-2.36422	0.0180681	0.37328
ENSMUSG00000014039	Prdm15	115.396	0.402299	0.170796	2.35543	0.0185014	0.379173
ENSMUSG00000038530	Rgs4	795.798	-0.241109	0.102388	-2.35486	0.0185297	0.379173
ENSMUSG00000108249	Gm43960	103.514	0.364936	0.154996	2.35448	0.0185486	0.379173
ENSMUSG00000006498	Ptbp1	1028.3	-0.265993	0.113317	-2.34733	0.0189084	0.385176
ENSMUSG00000001467	Cyp51	758.088	0.237109	0.101213	2.34267	0.0191462	0.385971
ENSMUSG00000095186	Gm10718	575.45	0.30687	0.130856	2.34509	0.0190227	0.385971
ENSMUSG00000104377	Gm37515	308.343	0.373938	0.159562	2.34353	0.0191025	0.385971
ENSMUSG00000034570	Inpp5j	167	-0.339463	0.145021	-2.34079	0.0192429	0.386583
ENSMUSG00000020458	Rtn4	694.728	0.239178	0.102313	2.33771	0.0194022	0.387144
ENSMUSG00000032047	Acat1	458.452	0.281072	0.120235	2.33768	0.0194037	0.387144
ENSMUSG00000025781	Atp5c1	306.924	-0.301964	0.129336	-2.33473	0.0195574	0.388878
ENSMUSG00000025232	Hexa	779.125	-0.247666	0.1063	-2.32988	0.0198122	0.391275
ENSMUSG00000027479	Mapre1	1203.89	-0.323987	0.139049	-2.33002	0.0198051	0.391275
ENSMUSG00000027254	Map1a	182.661	-0.326495	0.14027	-2.32762	0.0199321	0.392313
ENSMUSG00000027425	Kat14	157.154	0.365581	0.157822	2.31642	0.0205355	0.396158
ENSMUSG00000027715	Ccna2	2228.56	-0.279237	0.120384	-2.31955	0.020365	0.396158
ENSMUSG00000045991	Onecut2	848.051	-0.303791	0.131104	-2.31718	0.0204938	0.396158
ENSMUSG00000048012	Zfp473	107.943	0.377295	0.162477	2.32215	0.0202251	0.396158
ENSMUSG00000048922	Cdca2	170.134	0.33225	0.1434	2.31695	0.0205065	0.396158
ENSMUSG00000109195	Gm45038	168.837	0.363773	0.156805	2.3199	0.0203461	0.396158
ENSMUSG00000024298	Zfp871	401.882	-0.308969	0.133622	-2.31226	0.0207633	0.399231
ENSMUSG00000018102	Hist1h2bc	147.56	-0.374625	0.16215	-2.31037	0.0208677	0.399303
ENSMUSG00000052516	Robo2	1281.54	0.216072	0.0935994	2.30848	0.0209727	0.399303
ENSMUSG00000109196	Gm44715	106.08	0.379434	0.164339	2.30886	0.0209516	0.399303
ENSMUSG00000015766	Eps8	119.308	0.372937	0.161815	2.30472	0.0211824	0.401982
ENSMUSG00000019132	BC005537	634.602	0.248704	0.108169	2.29922	0.0214925	0.403921
ENSMUSG00000022434	Fam118a	127.729	0.357426	0.15544	2.29944	0.0214799	0.403921
ENSMUSG00000100768	Gm29055	207.045	0.353024	0.153423	2.30099	0.021392	0.403921
ENSMUSG00000061331	Gm17132	281.963	0.366929	0.159916	2.29451	0.0217611	0.407654
ENSMUSG00000037822	Smim14	210.273	-0.307721	0.134319	-2.29097	0.0219654	0.410161
ENSMUSG00000093989	Rnasek	788.546	-0.337178	0.147279	-2.28938	0.0220575	0.410565
ENSMUSG00000023764	Sfi1	114.441	0.394422	0.173051	2.27922	0.0226539	0.417127
ENSMUSG00000032193	Ldlr	684.222	0.265511	0.116511	2.27884	0.0226765	0.417127
ENSMUSG00000033031	Cip2a	305.657	-0.305792	0.134207	-2.27851	0.0226964	0.417127
ENSMUSG00000071415	Rpl23	192.957	-0.364933	0.160055	-2.28004	0.0226051	0.417127
ENSMUSG00000097695	Gm26905	3360.06	0.364647	0.160185	2.27641	0.0228216	0.418109
ENSMUSG00000021470	Ercc6l2	147.735	-0.327285	0.144369	-2.26701	0.0233896	0.424511
ENSMUSG00000062963	Ufc1	110.9	-0.355544	0.156774	-2.26788	0.0233368	0.424511
ENSMUSG00000099517	Hist1h3g	318.119	-0.309726	0.136584	-2.26765	0.0233504	0.424511
ENSMUSG00000029910	Mad2l1	132.586	-0.351148	0.155776	-2.25419	0.0241842	0.429565
ENSMUSG00000031835	Mbtps1	335.351	-0.288992	0.128043	-2.25699	0.0240088	0.429565
ENSMUSG00000034724	Cnot6l	876.743	0.330454	0.146438	2.25661	0.0240326	0.429565
ENSMUSG00000035683	Melk	126.273	-0.341398	0.151444	-2.25428	0.0241785	0.429565
ENSMUSG00000040652	Oaz2	108.061	0.358239	0.158509	2.26006	0.0238175	0.429565
ENSMUSG00000055320	Tead1	178.789	-0.344303	0.152622	-2.25592	0.0240756	0.429565
ENSMUSG00000096822	Olfr344	112.264	0.362349	0.160256	2.26106	0.0237554	0.429565
ENSMUSG00000031333	Abcb7	123.885	0.359173	0.15947	2.25229	0.024304	0.43038
ENSMUSG00000058407	Txndc9	136.368	-0.358292	0.159239	-2.25002	0.0244474	0.431609
ENSMUSG00000060671	Atp8b2	199.517	-0.311455	0.138722	-2.24518	0.0247568	0.435749
ENSMUSG00000039740	Alg2	476.442	-0.288049	0.128385	-2.24364	0.0248555	0.436169
ENSMUSG00000022788	Fgd4	365.446	0.401753	0.179348	2.24007	0.0250863	0.438643
ENSMUSG00000030002	Dusp11	183.709	-0.356228	0.159135	-2.23853	0.0251865	0.438643
ENSMUSG00000050912	Tmem123	122.34	-0.354592	0.158443	-2.23798	0.0252223	0.438643
ENSMUSG00000085328	Gm17131	556.817	0.377262	0.168724	2.23597	0.0253537	0.439615
ENSMUSG00000022054	Nefm	1754.18	0.232	0.103919	2.23251	0.0255816	0.439657
ENSMUSG00000022463	Srebf2	446.836	0.238156	0.106583	2.23446	0.0254528	0.439657
ENSMUSG00000037306	Man1c1	104.498	0.354465	0.158775	2.23249	0.0255825	0.439657
ENSMUSG00000003038	Hmgn2	1138.09	-0.246551	0.110527	-2.23068	0.0257021	0.440413
ENSMUSG00000064358	mt-Co3	1444.57	-0.310229	0.13926	-2.2277	0.0259004	0.442509
ENSMUSG00000038208	Pgap3	114.849	0.342645	0.154628	2.21593	0.0266966	0.453686
ENSMUSG00000060992	Copz1	359.177	-0.273089	0.12325	-2.21573	0.0267103	0.453686
ENSMUSG00000001403	Ube2c	606.304	-0.276075	0.124759	-2.21288	0.0269062	0.454364
ENSMUSG00000039771	Polr2j	179.517	-0.352003	0.159043	-2.21326	0.0268798	0.454364
ENSMUSG00000022684	Bfar	144.889	0.399033	0.180446	2.21137	0.02701	0.454798
ENSMUSG00000021952	Xpo4	136.047	0.3465	0.157338	2.20226	0.0276469	0.457717
ENSMUSG00000022105	Rb1	418.682	-0.285926	0.129711	-2.20433	0.027501	0.457717
ENSMUSG00000028691	Prdx1	747.645	-0.282431	0.128252	-2.20215	0.0276547	0.457717
ENSMUSG00000034636	Zyg11b	199.447	0.318128	0.144338	2.20405	0.0275209	0.457717
ENSMUSG00000038872	Zfhx3	864.58	-0.215092	0.0976448	-2.2028	0.0276085	0.457717
ENSMUSG00000069300	Hist1h2bj	125.944	-0.351239	0.15943	-2.20309	0.0275887	0.457717
ENSMUSG00000096519	Gm10721	394.778	0.280698	0.127555	2.20061	0.0277636	0.458217
ENSMUSG00000038533	Cbfa2t2	134.589	0.3569	0.162267	2.19946	0.027845	0.458262
ENSMUSG00000052748	Swt1	138.422	0.35071	0.159699	2.19607	0.0280867	0.460915
ENSMUSG00000059729	Olfr1385	120.869	0.352762	0.160793	2.19389	0.0282435	0.460915
ENSMUSG00000096385	Gm11168	383.231	0.280139	0.12767	2.19425	0.0282175	0.460915
ENSMUSG00000020493	Prr11	390.511	-0.309015	0.141289	-2.18712	0.0287338	0.461711
ENSMUSG00000021306	Gpr137b	123.538	-0.335447	0.153388	-2.18692	0.0287483	0.461711
ENSMUSG00000026520	Pycr2	203.333	0.304322	0.139517	2.18126	0.029164	0.461711
ENSMUSG00000026917	Wdr5	155.328	0.335068	0.152929	2.191	0.0284516	0.461711
ENSMUSG00000028042	Zbtb7b	130.321	0.346235	0.158175	2.18893	0.0286019	0.461711
ENSMUSG00000029570	Lfng	127.075	0.33445	0.153191	2.18322	0.0290199	0.461711
ENSMUSG00000038167	Plekhg6	170.062	0.31185	0.142856	2.18297	0.0290383	0.461711
ENSMUSG00000047368	Abhd17b	178.124	0.325269	0.148916	2.18425	0.0289442	0.461711
ENSMUSG00000069305	Hist1h4n	113.129	-0.377052	0.172746	-2.1827	0.0290577	0.461711
ENSMUSG00000094472	Gm21897	321.1	0.345826	0.158136	2.18689	0.0287504	0.461711
ENSMUSG00000097971	Gm26917	7345.49	0.35691	0.163586	2.18178	0.0291257	0.461711
ENSMUSG00000027326	Knl1	251.132	-0.331469	0.152179	-2.17815	0.029395	0.464063
ENSMUSG00000036875	Dna2	1085.66	-0.242233	0.111263	-2.17712	0.0294719	0.464063
ENSMUSG00000008305	Tle1	128.725	0.322996	0.148447	2.17583	0.0295679	0.464319
ENSMUSG00000042515	Mum1l1	169.311	-0.325191	0.14957	-2.17418	0.0296917	0.46501
ENSMUSG00000062078	Qk	367.103	-0.266437	0.122637	-2.17257	0.0298128	0.465656
ENSMUSG00000015575	Atp6v0e	1626.02	-0.300055	0.138514	-2.16624	0.030293	0.465809
ENSMUSG00000027540	Ptpn1	186.321	0.32834	0.151621	2.16553	0.0303469	0.465809
ENSMUSG00000033964	Zbtb41	445.404	-0.253915	0.117327	-2.16416	0.0304523	0.465809
ENSMUSG00000041920	Slc16a6	374.928	-0.294578	0.136	-2.16601	0.0303107	0.465809
ENSMUSG00000041935	AW549877	408.191	-0.292083	0.134819	-2.16648	0.0302744	0.465809
ENSMUSG00000095547	Gm10719	815.049	0.260778	0.120506	2.16403	0.0304623	0.465809
ENSMUSG00000098557	Kctd12	216.392	-0.303316	0.139713	-2.17099	0.0299322	0.465809
ENSMUSG00000102918	Pcdhgc3	284.885	-0.270661	0.124804	-2.16868	0.030107	0.465809
ENSMUSG00000033237	Arid2	392.2	0.258101	0.119381	2.16199	0.0306189	0.466978
ENSMUSG00000027634	Ndrg3	225.275	0.32994	0.152722	2.16039	0.0307423	0.467637
ENSMUSG00000054889	Dsp	155.488	-0.317817	0.147244	-2.15843	0.0308942	0.468723
ENSMUSG00000033943	Mga	884.687	0.261003	0.121447	2.14912	0.0316249	0.477322
ENSMUSG00000052681	Rap1b	724.702	-0.260445	0.121146	-2.14985	0.0315672	0.477322
ENSMUSG00000075254	Heg1	704.848	0.232788	0.108409	2.14732	0.0317679	0.478243
ENSMUSG00000066415	Msl2	668.542	-0.265786	0.123994	-2.14353	0.0320705	0.480315
ENSMUSG00000111485	Gm48443	506.654	0.348963	0.162735	2.14437	0.0320035	0.480315
ENSMUSG00000026525	Opn3	126.497	-0.33768	0.157651	-2.14195	0.0321977	0.480985
ENSMUSG00000028757	Ddost	2154.19	-0.195012	0.0911499	-2.13947	0.032398	0.482738
ENSMUSG00000019370	Calm3	1312.48	-0.192298	0.090165	-2.13273	0.032947	0.487186
ENSMUSG00000039782	Cpeb2	431.695	-0.24952	0.116996	-2.13272	0.0329473	0.487186
ENSMUSG00000111824	Gm47102	141.991	0.300362	0.140727	2.13436	0.0328136	0.487186
ENSMUSG00000027765	P2ry1	1153.89	0.243702	0.114588	2.12676	0.0334398	0.493216
ENSMUSG00000031585	Gtf2e2	178.063	0.315855	0.148884	2.12149	0.0338808	0.496788
ENSMUSG00000064339	mt-Rnr2	23091.7	-0.382684	0.180423	-2.12104	0.0339183	0.496788
ENSMUSG00000071533	Pcnp	105.527	-0.341093	0.160831	-2.12081	0.0339378	0.496788
ENSMUSG00000031004	Mki67	1999.13	-0.273412	0.12918	-2.11652	0.0343005	0.500838
ENSMUSG00000036372	Tmem258	765.221	-0.307774	0.14559	-2.11398	0.0345167	0.502736
ENSMUSG00000054604	Cggbp1	354.013	-0.30769	0.145821	-2.11005	0.0348539	0.506381
ENSMUSG00000063568	Jazf1	103.889	-0.347907	0.164978	-2.1088	0.0349614	0.50668
ENSMUSG00000027806	Tsc22d2	486.754	-0.267806	0.127157	-2.1061	0.0351952	0.50832
ENSMUSG00000075015	Gm10801	2470.73	0.245031	0.116377	2.10548	0.0352491	0.50832
ENSMUSG00000024413	Npc1	172.556	0.313673	0.149158	2.10295	0.0354698	0.508983
ENSMUSG00000020978	Klhdc2	426.685	-0.264609	0.12595	-2.1009	0.0356496	0.51001
ENSMUSG00000026213	Stk11ip	106.227	0.357686	0.170396	2.09915	0.035804	0.51001
ENSMUSG00000095280	Gm21738	438.955	0.246503	0.117411	2.09949	0.0357738	0.51001
ENSMUSG00000049556	Lingo1	369.382	0.300287	0.143165	2.09748	0.0359511	0.510856
ENSMUSG00000004040	Stat3	422.51	0.290668	0.1388	2.09415	0.036247	0.511522
ENSMUSG00000008398	Elk3	155.108	-0.307409	0.147014	-2.09102	0.0365263	0.511522
ENSMUSG00000013160	Atp6v0d1	1395.13	-0.264343	0.126415	-2.09108	0.0365213	0.511522
ENSMUSG00000031508	Ankrd10	544.973	-0.216303	0.103659	-2.08668	0.0369169	0.511522
ENSMUSG00000032265	Tent5a	390.784	-0.269284	0.128785	-2.09097	0.0365311	0.511522
ENSMUSG00000032359	Ctsh	182.892	-0.299902	0.143171	-2.09471	0.0361964	0.511522
ENSMUSG00000051154	Commd3	156.659	-0.320081	0.153086	-2.09086	0.036541	0.511522
ENSMUSG00000053166	Cdh22	154.673	0.303852	0.145605	2.08682	0.0369043	0.511522
ENSMUSG00000060678	Hist1h4c	154.736	-0.325672	0.15611	-2.08617	0.0369633	0.511522
ENSMUSG00000097312	Gm26870	13086.9	0.23928	0.114633	2.08735	0.0368565	0.511522
ENSMUSG00000097789	Gm2115	121.151	-0.335539	0.16084	-2.08616	0.0369637	0.511522
ENSMUSG00000020423	Btg2	2769.48	-0.197733	0.0948779	-2.08408	0.0371531	0.512925
ENSMUSG00000025858	Get4	172.5	0.292182	0.140431	2.08061	0.0374696	0.514854
ENSMUSG00000064360	mt-Nd3	259.459	-0.341662	0.164194	-2.08084	0.0374481	0.514854
ENSMUSG00000034158	Lrrc58	860.631	-0.195872	0.0943582	-2.07583	0.0379097	0.519675
ENSMUSG00000000838	Fmr1	227.361	-0.292033	0.140985	-2.07138	0.0383229	0.521388
ENSMUSG00000012443	Kif11	221.036	-0.278192	0.134446	-2.06917	0.0385302	0.521388
ENSMUSG00000029344	Tpst2	112.548	-0.328163	0.158777	-2.06683	0.0387506	0.521388
ENSMUSG00000029787	Avl9	476.393	0.223395	0.107882	2.07073	0.0383838	0.521388
ENSMUSG00000038943	Prc1	278.268	-0.278602	0.134788	-2.06697	0.0387369	0.521388
ENSMUSG00000047409	Ctdspl	827.919	-0.208275	0.100705	-2.06816	0.038625	0.521388
ENSMUSG00000059791	Nrm	178.869	0.33421	0.161489	2.06955	0.0384944	0.521388
ENSMUSG00000111777	Gm47147	143.806	0.330304	0.159811	2.06684	0.0387492	0.521388
ENSMUSG00000060126	Tpt1	630.079	-0.313262	0.151646	-2.06575	0.0388526	0.521555
ENSMUSG00000001100	Poldip2	187.346	0.280927	0.136124	2.06376	0.0390408	0.522878
ENSMUSG00000064856	Gm23444	209.593	0.361674	0.175626	2.05934	0.0394616	0.525844
ENSMUSG00000094050	Gm23472	209.61	0.361686	0.175607	2.05963	0.0394342	0.525844
ENSMUSG00000111220	Kif11	220.935	-0.276989	0.134552	-2.0586	0.039533	0.525844
ENSMUSG00000075014	Gm10800	29528.2	0.231472	0.112565	2.05634	0.0397499	0.52679
ENSMUSG00000089940	Gm4117	255.025	0.337284	0.164051	2.05597	0.039785	0.52679
ENSMUSG00000025949	Pikfyve	391.412	0.311571	0.151817	2.05228	0.0401421	0.530313
ENSMUSG00000050029	Rap2c	294.096	-0.288743	0.141224	-2.04457	0.0408969	0.539062
ENSMUSG00000054808	Actn4	1242.62	0.196335	0.0961587	2.04178	0.0411736	0.541485
ENSMUSG00000037916	Ndufv1	206.17	0.269339	0.132052	2.03965	0.0413855	0.543045
ENSMUSG00000048620	Olfr1336	117.483	0.343035	0.168532	2.03542	0.0418084	0.546555
ENSMUSG00000111585	Gm47355	105.817	0.318673	0.156588	2.0351	0.0418407	0.546555
ENSMUSG00000027447	Cst3	218.884	-0.286033	0.140695	-2.03301	0.0420515	0.548081
ENSMUSG00000036452	Arhgap26	133	0.33362	0.164232	2.0314	0.0422144	0.548976
ENSMUSG00000003847	Nfat5	1216.4	-0.233876	0.11591	-2.01775	0.0436178	0.55301
ENSMUSG00000014195	Dnajc7	135.489	0.317201	0.156716	2.02405	0.0429646	0.55301
ENSMUSG00000021635	Rad17	106.316	0.330128	0.163441	2.01986	0.0433979	0.55301
ENSMUSG00000028796	Phc2	365.298	0.235163	0.11628	2.02239	0.0431358	0.55301
ENSMUSG00000030934	Oat	148.081	-0.295158	0.146096	-2.0203	0.0433526	0.55301
ENSMUSG00000031111	Igsf1	365.27	-0.26425	0.130509	-2.02476	0.0428917	0.55301
ENSMUSG00000032468	Armc8	206.832	-0.274522	0.136104	-2.017	0.0436957	0.55301
ENSMUSG00000040356	Skiv2l	154.07	0.314601	0.155904	2.01791	0.0436007	0.55301
ENSMUSG00000066263	Olfr639	142.617	0.321615	0.1595	2.0164	0.0437586	0.55301
ENSMUSG00000069273	Hist1h3e	231.736	-0.271296	0.134491	-2.01721	0.0436737	0.55301
ENSMUSG00000074064	Mlycd	118.342	0.316766	0.156303	2.02662	0.042701	0.55301
ENSMUSG00000074564	Gm10720	392.058	0.229652	0.113877	2.01667	0.0437296	0.55301
ENSMUSG00000095891	Gm10717	856.793	0.232036	0.115073	2.01643	0.0437552	0.55301
ENSMUSG00000078622	Ccdc47	247.006	0.256735	0.127437	2.0146	0.0439463	0.55418
ENSMUSG00000083594	Gm13722	159.384	0.339299	0.168512	2.0135	0.0440619	0.554437
ENSMUSG00000026721	Rabgap1l	112.42	0.321372	0.159972	2.00892	0.0445454	0.55595
ENSMUSG00000030102	Itpr1	160.6	0.326968	0.16262	2.01062	0.0443653	0.55595
ENSMUSG00000044533	Rps2	405.104	0.249611	0.124262	2.00875	0.0445638	0.55595
ENSMUSG00000061306	Slc38a10	371.561	-0.244792	0.121825	-2.00937	0.0444977	0.55595
ENSMUSG00000024366	Gfra3	146.013	0.307069	0.153029	2.00661	0.0447917	0.556016
ENSMUSG00000026923	Notch1	313.381	0.298422	0.14883	2.00512	0.0449503	0.556016
ENSMUSG00000029763	Exoc4	326.561	0.27679	0.137865	2.00769	0.0446763	0.556016
ENSMUSG00000031840	Rab3a	488.67	-0.268061	0.133688	-2.00511	0.0449508	0.556016
ENSMUSG00000027495	Fam210b	206.285	-0.296611	0.148028	-2.00375	0.0450964	0.556635
ENSMUSG00000021385	Ippk	267.109	0.253666	0.126883	1.99921	0.0455853	0.561084
ENSMUSG00000025583	Rptor	191.209	0.285066	0.142631	1.99862	0.0456495	0.561084
ENSMUSG00000013701	Timm23	227.426	0.287123	0.143854	1.99593	0.0459417	0.561486
ENSMUSG00000029135	Fosl2	720.976	-0.216089	0.10825	-1.9962	0.0459121	0.561486
ENSMUSG00000038368	Focad	131.685	0.363302	0.182068	1.99542	0.0459974	0.561486
ENSMUSG00000040268	Plekha1	428.766	-0.234777	0.117696	-1.99477	0.0460677	0.561486
ENSMUSG00000028212	Ccne2	969.011	-0.278154	0.140092	-1.98552	0.0470871	0.564924
ENSMUSG00000028402	Mpdz	131.103	-0.317372	0.159463	-1.99025	0.0465633	0.564924
ENSMUSG00000032340	Neo1	382.842	-0.266158	0.134038	-1.98568	0.0470684	0.564924
ENSMUSG00000032381	Fam96a	169.506	0.305363	0.153631	1.98764	0.0468517	0.564924
ENSMUSG00000039838	Slc45a1	173.726	0.277084	0.139452	1.98694	0.0469286	0.564924
ENSMUSG00000042523	Dnal1	117.053	-0.329357	0.165401	-1.99126	0.0464524	0.564924
ENSMUSG00000089617	Scarna10	115.875	-0.334801	0.168423	-1.98786	0.0468276	0.564924
ENSMUSG00000091028	Gm10722	237.02	0.215676	0.108643	1.98517	0.0471255	0.564924
ENSMUSG00000019818	Cd164	1936.86	-0.252289	0.127343	-1.98118	0.0475706	0.568723
ENSMUSG00000093656	Gm20628	124.835	-0.314141	0.15861	-1.98059	0.0476376	0.568723
ENSMUSG00000035382	Pcsk7	122.131	0.322221	0.162861	1.9785	0.0478723	0.570356
ENSMUSG00000026103	Gls	279.989	-0.253901	0.128442	-1.97678	0.0480666	0.571502
ENSMUSG00000070923	Klhl9	343.999	-0.263673	0.133494	-1.97517	0.0482487	0.572499
ENSMUSG00000006307	Kmt2b	684.947	-0.205674	0.104249	-1.97291	0.0485057	0.573213
ENSMUSG00000062234	Gak	376.467	-0.238714	0.120952	-1.97362	0.0484253	0.573213
ENSMUSG00000030759	Far1	419.804	-0.228057	0.115722	-1.97073	0.048755	0.574025
ENSMUSG00000040025	Ythdf2	392.948	0.252582	0.128232	1.96972	0.04887	0.574025
ENSMUSG00000048078	Tenm4	274.877	-0.305951	0.155319	-1.96983	0.0488582	0.574025
ENSMUSG00000015733	Capza2	212.448	0.280335	0.142482	1.96751	0.0491245	0.574638
ENSMUSG00000020952	Scfd1	189.205	-0.294086	0.149579	-1.96609	0.0492883	0.574638
ENSMUSG00000032582	Rbm6	122.366	0.309777	0.157609	1.96547	0.0493598	0.574638
ENSMUSG00000064220	Hist2h2aa1	172.079	-0.315411	0.160495	-1.96524	0.0493866	0.574638
ENSMUSG00000069310	Hist1h3c	167.76	-0.319448	0.162711	-1.96329	0.0496126	0.574638
ENSMUSG00000111327	Gm48401	138.786	0.311154	0.158425	1.96405	0.0495245	0.574638
ENSMUSG00000111551	Gm48128	846.724	0.292837	0.149096	1.96409	0.0495199	0.574638
ENSMUSG00000035203	Epn1	535.531	0.256803	0.13112	1.95854	0.0501667	0.579903
ENSMUSG00000037553	Zdhhc18	123.589	0.332321	0.170403	1.95021	0.051151	0.58792
ENSMUSG00000078317	F8a	180.662	0.267235	0.137036	1.95011	0.0511629	0.58792
ENSMUSG00000079614	Seh1l	197.38	0.287413	0.147374	1.95024	0.0511479	0.58792
ENSMUSG00000002608	Ccdc97	111.006	0.299462	0.153921	1.94555	0.0517083	0.588976
ENSMUSG00000036698	Ago2	817.794	-0.213782	0.109937	-1.94458	0.051825	0.588976
ENSMUSG00000050931	Sgms2	308.446	0.285043	0.146606	1.94428	0.0518614	0.588976
ENSMUSG00000058318	Phf21a	235.833	-0.262349	0.134741	-1.94705	0.0515284	0.588976
ENSMUSG00000058360	Gm10040	152.108	0.350095	0.180027	1.94468	0.0518134	0.588976
ENSMUSG00000071866	Ppia	1202.82	-0.22421	0.115153	-1.94706	0.0515278	0.588976
ENSMUSG00000024969	Mark2	400.974	0.226534	0.116671	1.94165	0.0521794	0.591434
ENSMUSG00000022812	Gsk3b	280.731	-0.254573	0.131594	-1.93453	0.0530474	0.592629
ENSMUSG00000023236	Scg5	520.791	-0.2268	0.117358	-1.93256	0.0532908	0.592629
ENSMUSG00000024142	Mlst8	168.227	0.270113	0.140015	1.92918	0.0537089	0.592629
ENSMUSG00000028165	Cisd2	215.027	-0.287568	0.14902	-1.92972	0.053641	0.592629
ENSMUSG00000030452	Nipa2	166.465	0.298899	0.154894	1.92971	0.0536431	0.592629
ENSMUSG00000039860	Srrm3	176.414	0.28531	0.147828	1.93001	0.0536051	0.592629
ENSMUSG00000047757	Fancb	192.752	-0.296174	0.153504	-1.92942	0.0536788	0.592629
ENSMUSG00000051378	Kif18b	167.14	-0.283695	0.14705	-1.92924	0.0537017	0.592629
ENSMUSG00000053581	Zfand2a	126.423	0.288059	0.148573	1.93884	0.0525214	0.592629
ENSMUSG00000055053	Nfic	1186.31	-0.182672	0.0944806	-1.93343	0.0531833	0.592629
ENSMUSG00000057914	Cacnb2	112.776	-0.316332	0.163361	-1.9364	0.0528184	0.592629
ENSMUSG00000061482	Hist1h4d	242.407	-0.273626	0.141101	-1.93922	0.0524744	0.592629
ENSMUSG00000062929	Cfl2	509.14	-0.257442	0.132907	-1.93702	0.0527435	0.592629
ENSMUSG00000064127	Med14	1097.88	-0.225674	0.116923	-1.93011	0.0535929	0.592629
ENSMUSG00000030036	Mogs	409.813	0.214374	0.11125	1.92695	0.0539855	0.594555
ENSMUSG00000074305	Peak1	106.649	-0.320332	0.166407	-1.92499	0.0542302	0.596123
ENSMUSG00000041258	Zfp236	129.839	0.300403	0.15642	1.9205	0.0547952	0.60007
ENSMUSG00000056536	Pign	155.684	0.334876	0.174309	1.92116	0.0547118	0.60007
ENSMUSG00000027808	Serp1	937.862	-0.192705	0.10047	-1.91804	0.0551058	0.602243
ENSMUSG00000031701	Dnaja2	211.221	-0.269483	0.140663	-1.9158	0.0553899	0.602243
ENSMUSG00000038774	Ascc3	686.212	-0.258651	0.13499	-1.91608	0.0553553	0.602243
ENSMUSG00000040365	Trim41	750.63	0.245817	0.128319	1.91567	0.0554072	0.602243
ENSMUSG00000029587	Zfp12	123.285	0.301604	0.15759	1.91386	0.0556386	0.603153
ENSMUSG00000030583	Sipa1l3	244.894	0.301074	0.157483	1.91179	0.0559036	0.603153
ENSMUSG00000039987	Phtf2	287.999	-0.241438	0.126255	-1.9123	0.0558375	0.603153
ENSMUSG00000055435	Maf	330.952	-0.246554	0.128966	-1.91178	0.055905	0.603153
ENSMUSG00000046574	Prr12	298.694	0.238381	0.125065	1.90605	0.0566437	0.609993
ENSMUSG00000002332	Dhrs1	360.158	-0.236236	0.124532	-1.89699	0.0578289	0.615235
ENSMUSG00000019849	Prep	199.268	-0.276041	0.145224	-1.9008	0.0573286	0.615235
ENSMUSG00000020715	Ern1	1270.68	-0.178021	0.0939382	-1.89509	0.0580809	0.615235
ENSMUSG00000025935	Tram1	944.514	0.191791	0.10105	1.89798	0.0576989	0.615235
ENSMUSG00000034648	Lrrn1	298.682	-0.280623	0.14807	-1.89521	0.0580646	0.615235
ENSMUSG00000038481	Cdk19	325.76	-0.241081	0.127123	-1.89644	0.0579023	0.615235
ENSMUSG00000039231	Suv39h1	184.628	0.265682	0.140074	1.89673	0.0578641	0.615235
ENSMUSG00000066042	Med18	169.726	0.269125	0.141951	1.8959	0.0579732	0.615235
ENSMUSG00000075266	Cenpw	221.302	-0.259756	0.136793	-1.8989	0.0575773	0.615235
ENSMUSG00000005299	Letm1	171.484	0.280391	0.148144	1.8927	0.0583983	0.616761
ENSMUSG00000052005	Gm9864	268.417	0.285848	0.15105	1.89241	0.0584367	0.616761
ENSMUSG00000017802	Retreg3	611.481	0.19168	0.10142	1.88996	0.0587635	0.619089
ENSMUSG00000029004	Kmt2e	359.778	0.237261	0.125786	1.88622	0.059265	0.623245
ENSMUSG00000056342	Usp34	1150.99	-0.20803	0.110436	-1.88372	0.0596034	0.624549
ENSMUSG00000096921	Gm26822	1759.2	0.345462	0.183373	1.88393	0.0595746	0.624549
ENSMUSG00000015759	Cnih1	313.101	-0.255176	0.135533	-1.88276	0.0597334	0.624788
ENSMUSG00000027429	Sec23b	469.467	-0.241647	0.128587	-1.87925	0.06021	0.628644
ENSMUSG00000058385	Hist1h2bg	137.818	-0.315041	0.167739	-1.87817	0.0603579	0.629061
ENSMUSG00000001964	Emd	476.646	-0.238555	0.127181	-1.87571	0.0606952	0.629265
ENSMUSG00000028444	Cntfr	273.824	0.227122	0.121483	1.86958	0.0615418	0.629265
ENSMUSG00000032330	Cox7a2	366.337	-0.279588	0.149062	-1.87565	0.060704	0.629265
ENSMUSG00000039016	Timm8b	248.353	-0.296492	0.158382	-1.87201	0.0612054	0.629265
ENSMUSG00000041685	Fcho2	321.886	-0.283137	0.151391	-1.87024	0.0614504	0.629265
ENSMUSG00000041798	Gck	106.465	0.297756	0.159267	1.86954	0.0615474	0.629265
ENSMUSG00000041895	Wipi1	1265.22	-0.221178	0.118201	-1.87119	0.0613183	0.629265
ENSMUSG00000051095	Olfr986	103.391	0.311333	0.166541	1.86941	0.0615656	0.629265
ENSMUSG00000053716	Dusp7	413.323	-0.224469	0.119707	-1.87515	0.0607721	0.629265
ENSMUSG00000055725	Paqr3	122.775	0.308015	0.164566	1.87168	0.0612505	0.629265
ENSMUSG00000065037	Rn7sk	3671.41	-0.229609	0.122724	-1.87094	0.061354	0.629265
ENSMUSG00000023991	Foxp4	165.239	0.272115	0.145685	1.86783	0.061786	0.630412
ENSMUSG00000042203	Tbc1d22b	139.274	0.277777	0.148826	1.86645	0.0619785	0.631271
ENSMUSG00000029048	Rer1	228.109	-0.248211	0.133076	-1.86519	0.0621553	0.631524
ENSMUSG00000055723	Rras2	237.016	-0.243237	0.130441	-1.86472	0.0622202	0.631524
ENSMUSG00000053560	Ier2	360.37	0.229011	0.122971	1.86231	0.0625588	0.633857
ENSMUSG00000018293	Pfn1	1037.56	-0.186874	0.100509	-1.85928	0.0629869	0.637087
ENSMUSG00000001120	Pcbp3	199.936	0.257966	0.138861	1.85772	0.0632083	0.637229
ENSMUSG00000014773	Dll1	355.565	0.231502	0.124673	1.85687	0.0633291	0.637229
ENSMUSG00000033948	Zswim5	327.567	-0.222957	0.120034	-1.85745	0.0632474	0.637229
ENSMUSG00000048388	Fam171b	215.497	-0.264451	0.14258	-1.85476	0.0636308	0.63916
ENSMUSG00000028837	Psmb2	346.998	-0.264189	0.142521	-1.85368	0.0637848	0.639456
ENSMUSG00000044791	Setd2	362.036	-0.237654	0.128253	-1.85302	0.0638798	0.639456
ENSMUSG00000004054	Map3k11	112.18	0.296407	0.161031	1.84068	0.0656683	0.639812
ENSMUSG00000020739	Nup85	162.532	-0.264969	0.143807	-1.84253	0.0653976	0.639812
ENSMUSG00000021497	Txndc15	157.168	0.269997	0.146538	1.8425	0.0654018	0.639812
ENSMUSG00000024378	Stard4	203.197	0.263374	0.142312	1.85068	0.0642161	0.639812
ENSMUSG00000026163	Sphkap	1165.75	-0.192792	0.104703	-1.84131	0.0655756	0.639812
ENSMUSG00000027671	Actl6a	104.037	0.297003	0.16148	1.83926	0.0658776	0.639812
ENSMUSG00000027963	Extl2	154.402	-0.289482	0.157411	-1.83901	0.065913	0.639812
ENSMUSG00000028639	Ybx1	242.057	-0.259107	0.140652	-1.84218	0.0654482	0.639812
ENSMUSG00000029238	Clock	458.679	-0.232257	0.126364	-1.838	0.0660631	0.639812
ENSMUSG00000032637	Atxn2l	1418.51	-0.223569	0.120896	-1.84926	0.0644202	0.639812
ENSMUSG00000034751	Mast4	401.832	-0.215149	0.11671	-1.84345	0.0652636	0.639812
ENSMUSG00000046351	Zfp322a	133.492	-0.286889	0.155293	-1.84741	0.0646878	0.639812
ENSMUSG00000047881	Rell1	304.058	-0.251154	0.136577	-1.83892	0.0659277	0.639812
ENSMUSG00000048310	Pskh1	410.517	-0.226623	0.123123	-1.84062	0.0656776	0.639812
ENSMUSG00000048410	Zfp407	135.243	-0.305884	0.166278	-1.83959	0.0658279	0.639812
ENSMUSG00000052040	Klf13	424.809	0.207989	0.112734	1.84495	0.0650448	0.639812
ENSMUSG00000064367	mt-Nd5	3100.19	-0.241003	0.130808	-1.84241	0.065415	0.639812
ENSMUSG00000067194	Eif1ax	288.134	0.258986	0.140182	1.84749	0.0646755	0.639812
ENSMUSG00000076432	Ywhaq	1232.07	-0.183876	0.099918	-1.84027	0.0657283	0.639812
ENSMUSG00000093904	Tomm20	240.622	0.253966	0.138201	1.83767	0.0661117	0.639812
ENSMUSG00000000085	Scmh1	323.04	-0.226524	0.123619	-1.83243	0.0668872	0.640477
ENSMUSG00000018965	Ywhah	854.391	-0.228491	0.125121	-1.82617	0.0678252	0.640477
ENSMUSG00000019082	Slc25a22	212.162	0.244495	0.13322	1.83527	0.0664656	0.640477
ENSMUSG00000020368	Canx	1384.59	0.176238	0.0962416	1.8312	0.0670707	0.640477
ENSMUSG00000021256	Vash1	231.438	0.242334	0.132747	1.82553	0.0679213	0.640477
ENSMUSG00000024091	Vapa	280.206	0.250451	0.136958	1.82867	0.0674485	0.640477
ENSMUSG00000024382	Ercc3	121.426	-0.274838	0.149746	-1.83537	0.0664514	0.640477
ENSMUSG00000024579	Pcyox1l	360.274	-0.245944	0.134508	-1.82847	0.067479	0.640477
ENSMUSG00000025968	Ndufs1	272.079	0.23709	0.129626	1.82903	0.067395	0.640477
ENSMUSG00000029475	Kdm2b	283.604	0.232405	0.127238	1.82654	0.0677684	0.640477
ENSMUSG00000031010	Usp9x	1927.51	-0.218958	0.11977	-1.82816	0.0675259	0.640477
ENSMUSG00000032525	Nktr	892.804	0.193784	0.105694	1.83344	0.0667368	0.640477
ENSMUSG00000042167	Papd4	580.871	-0.245038	0.134275	-1.82489	0.068017	0.640477
ENSMUSG00000088088	Rmrp	617.159	-0.329185	0.17948	-1.83411	0.0666381	0.640477
ENSMUSG00000090553	Snrpe	110.699	0.298096	0.162637	1.83289	0.0668191	0.640477
ENSMUSG00000101776	Gm28268	126.14	0.289386	0.158547	1.82524	0.0679647	0.640477
ENSMUSG00000108803	4930533N22Rik	252.8	0.289528	0.158673	1.82468	0.0680493	0.640477
ENSMUSG00000056579	Tug1	853.695	0.181603	0.0995719	1.82384	0.0681761	0.640636
ENSMUSG00000024841	Eif1ad	279.08	0.231221	0.127076	1.81956	0.0688267	0.645708
ENSMUSG00000020601	Trib2	361.618	-0.21833	0.120303	-1.81484	0.0695492	0.646242
ENSMUSG00000021047	Nova1	212.909	-0.252705	0.139157	-1.81598	0.069374	0.646242
ENSMUSG00000021690	Jmy	105.025	-0.281262	0.154812	-1.8168	0.0692483	0.646242
ENSMUSG00000046707	Csnk2a2	170.707	-0.284956	0.156996	-1.81505	0.0695159	0.646242
ENSMUSG00000074476	Spc24	130.763	0.279902	0.154129	1.81603	0.0693662	0.646242
ENSMUSG00000087141	Plcxd2	423.81	-0.224598	0.12372	-1.81538	0.0694662	0.646242
ENSMUSG00000021193	Pitrm1	342.895	-0.219858	0.121379	-1.81134	0.0700884	0.649181
ENSMUSG00000026753	Ppp6c	382.321	-0.248302	0.137057	-1.81168	0.070036	0.649181
ENSMUSG00000055639	Dach1	345.692	-0.243311	0.134447	-1.80971	0.0703402	0.65048
ENSMUSG00000021901	Bap1	201.956	0.24979	0.138174	1.80779	0.0706395	0.651272
ENSMUSG00000031438	Rnf128	282.171	-0.234914	0.12995	-1.80772	0.0706495	0.651272
ENSMUSG00000038375	Trp53inp2	4300.31	-0.201099	0.111435	-1.80462	0.0711336	0.654699
ENSMUSG00000053931	Cnn3	342.074	-0.27405	0.151985	-1.80314	0.0713668	0.655809
ENSMUSG00000026153	Fam135a	1121.48	-0.214328	0.119135	-1.79903	0.0720141	0.656584
ENSMUSG00000027255	Arfgap2	233.992	0.250541	0.13912	1.80089	0.0717197	0.656584
ENSMUSG00000054115	Skp2	691.419	-0.236421	0.131317	-1.80039	0.0717988	0.656584
ENSMUSG00000066735	Vkorc1l1	211.68	0.244941	0.136152	1.79903	0.0720146	0.656584
ENSMUSG00000068284	Usf3	290.663	-0.231508	0.128596	-1.80028	0.0718172	0.656584
ENSMUSG00000049470	Aff4	831.966	-0.22513	0.125554	-1.79309	0.0729585	0.663237
ENSMUSG00000056851	Pcbp2	332.701	-0.268412	0.1497	-1.79301	0.072972	0.663237
ENSMUSG00000034687	Fras1	419.693	0.268484	0.149854	1.79164	0.0731899	0.664181
ENSMUSG00000022565	Plec	570.782	0.220689	0.12327	1.79029	0.0734068	0.665114
ENSMUSG00000058070	Eml1	162.557	0.26732	0.14944	1.78881	0.0736447	0.666233
ENSMUSG00000024735	Prpf19	529.643	0.183892	0.102863	1.78774	0.0738184	0.666729
ENSMUSG00000025538	Sumf2	117.454	0.293419	0.16423	1.78663	0.0739976	0.666729
ENSMUSG00000034300	Fam53c	360.44	-0.209148	0.117127	-1.78564	0.0741572	0.666729
ENSMUSG00000049775	Tmsb4x	112.426	-0.277812	0.15558	-1.78565	0.0741565	0.666729
ENSMUSG00000050812	Ecpas	598.571	0.200945	0.112657	1.78368	0.0744749	0.668553
ENSMUSG00000061436	Hipk2	242.191	-0.233105	0.131098	-1.77809	0.0753884	0.67364
ENSMUSG00000070639	Lrrc8b	129.189	-0.276575	0.155528	-1.77829	0.0753556	0.67364
ENSMUSG00000071547	Nt5dc2	627.361	-0.229045	0.128782	-1.77855	0.0753142	0.67364
ENSMUSG00000019505	Ubb	1047.45	-0.205419	0.115694	-1.77553	0.0758101	0.674276
ENSMUSG00000019841	Rev3l	803.009	-0.242104	0.136356	-1.77553	0.0758109	0.674276
ENSMUSG00000027365	Trpm7	440.259	-0.201271	0.113402	-1.77485	0.0759226	0.674276
ENSMUSG00000043140	Tmem186	425.933	-0.220086	0.123859	-1.77691	0.0755825	0.674276
ENSMUSG00000020262	Adarb1	162.398	0.251785	0.142166	1.77106	0.0765502	0.677736
ENSMUSG00000038335	Tsr1	179.099	0.248005	0.140084	1.7704	0.0766612	0.677736
ENSMUSG00000057469	E2f6	350.394	-0.211645	0.119506	-1.771	0.0765599	0.677736
ENSMUSG00000035885	Cox8a	493.29	-0.233775	0.132446	-1.76506	0.0775541	0.6842
ENSMUSG00000042133	Ppig	170.299	-0.274631	0.155634	-1.76459	0.0776323	0.6842
ENSMUSG00000048799	Cep120	312.466	-0.232006	0.131528	-1.76392	0.0777447	0.6842
ENSMUSG00000078676	Casc3	253.733	0.238774	0.13556	1.76139	0.0781731	0.686933
ENSMUSG00000068876	Cgn	447.962	0.218381	0.124059	1.76029	0.0783581	0.687522
ENSMUSG00000039470	Zdhhc2	640.773	-0.210956	0.119988	-1.75815	0.078722	0.689676
ENSMUSG00000031604	Msmo1	241.597	0.244472	0.139147	1.75693	0.0789295	0.690456
ENSMUSG00000021877	Arf4	900.436	-0.242212	0.138047	-1.75457	0.0793334	0.691615
ENSMUSG00000026039	Sgo2a	108.568	-0.283885	0.161723	-1.75538	0.0791941	0.691615
ENSMUSG00000031059	Ndufb11	181.637	-0.25065	0.142952	-1.75338	0.0795369	0.691615
ENSMUSG00000036438	Calm2	302.377	-0.248115	0.141469	-1.75385	0.0794564	0.691615
ENSMUSG00000030528	Blm	118.256	-0.276938	0.1581	-1.75166	0.0798324	0.69315
ENSMUSG00000030647	Ndufc2	159.023	-0.258953	0.147932	-1.75049	0.0800343	0.693869
ENSMUSG00000037343	Taf2	289.8	-0.21943	0.125602	-1.74702	0.0806336	0.698026
ENSMUSG00000063972	Nr6a1	772.257	-0.211258	0.120997	-1.74597	0.080816	0.698566
ENSMUSG00000041096	Tspyl2	174.037	0.252507	0.144806	1.74375	0.0812021	0.699827
ENSMUSG00000045427	Hnrnph2	216.784	0.249966	0.143303	1.74433	0.0811023	0.699827
ENSMUSG00000026782	Abi2	290.438	0.253177	0.145322	1.74218	0.0814761	0.701152
ENSMUSG00000037119	Fam91a1	550.734	-0.209444	0.120296	-1.74107	0.0816714	0.701796
ENSMUSG00000022412	Mief1	438.635	-0.197403	0.113606	-1.73762	0.0822778	0.701998
ENSMUSG00000028233	Tgs1	307.903	-0.226066	0.130123	-1.73733	0.0823287	0.701998
ENSMUSG00000030846	Tial1	866.775	-0.191887	0.110303	-1.73963	0.0819236	0.701998
ENSMUSG00000047832	Cdca4	581.823	-0.194383	0.111918	-1.73683	0.0824179	0.701998
ENSMUSG00000054387	Mdm4	342.106	-0.236312	0.135974	-1.73793	0.0822233	0.701998
ENSMUSG00000074922	Fam122a	406.998	-0.242934	0.139858	-1.73701	0.0823856	0.701998
ENSMUSG00000037313	Tacc3	125.83	-0.269623	0.15553	-1.73358	0.0829926	0.705861
ENSMUSG00000036752	Tubb4b	516.601	-0.196227	0.113257	-1.73258	0.0831705	0.706343
ENSMUSG00000079426	Arpc4	335.487	-0.214486	0.123896	-1.73118	0.0834205	0.707435
ENSMUSG00000037697	Ddhd1	230.699	-0.227238	0.131363	-1.72985	0.0836569	0.708409
ENSMUSG00000039270	Megf9	245.243	0.226841	0.131272	1.72803	0.0839832	0.710139
ENSMUSG00000037710	Cisd1	250.109	-0.224776	0.130224	-1.72608	0.084333	0.712064
ENSMUSG00000038894	Irs2	941.927	-0.203079	0.117773	-1.72433	0.0846485	0.713693
ENSMUSG00000020305	Asb3	156.842	-0.247385	0.143684	-1.72174	0.0851175	0.714599
ENSMUSG00000025959	Klf7	298.375	-0.246937	0.143595	-1.71967	0.0854919	0.714599
ENSMUSG00000027665	Pik3ca	360.696	-0.236577	0.137515	-1.72037	0.0853649	0.714599
ENSMUSG00000035621	Midn	478.856	0.231286	0.134483	1.71982	0.085465	0.714599
ENSMUSG00000042492	Tbc1d10b	523.114	0.192157	0.111657	1.72096	0.0852578	0.714599
ENSMUSG00000068566	Myadm	351.807	-0.237993	0.13815	-1.72271	0.0849408	0.714599
ENSMUSG00000026743	Mllt10	199.033	0.265017	0.154268	1.7179	0.0858157	0.716278
ENSMUSG00000005886	Ncoa2	223.846	-0.263739	0.153804	-1.71477	0.0863875	0.718501
ENSMUSG00000022914	Brwd1	776.855	-0.183916	0.107318	-1.71375	0.0865753	0.718501
ENSMUSG00000033684	Qsox1	642.926	0.17359	0.101269	1.71416	0.0865	0.718501
ENSMUSG00000046994	Mars2	141.987	-0.259974	0.151555	-1.71538	0.0862761	0.718501
ENSMUSG00000001105	Ift20	483.692	0.198638	0.116348	1.70728	0.0877707	0.721929
ENSMUSG00000002524	Puf60	299.189	0.216293	0.127213	1.70024	0.089086	0.721929
ENSMUSG00000010663	Fads1	673.009	-0.231534	0.136296	-1.69877	0.0893634	0.721929
ENSMUSG00000019528	Gyg	244.873	-0.27358	0.160679	-1.70265	0.0886339	0.721929
ENSMUSG00000020716	Nf1	410.775	0.198494	0.116876	1.69833	0.0894456	0.721929
ENSMUSG00000023034	Nr4a1	469.273	-0.198094	0.116379	-1.70215	0.0887275	0.721929
ENSMUSG00000027433	Xrn2	167.834	-0.25385	0.148804	-1.70593	0.0880211	0.721929
ENSMUSG00000029608	Rph3a	161.722	-0.239336	0.140869	-1.699	0.0893199	0.721929
ENSMUSG00000030232	Aebp2	194.484	0.243126	0.143171	1.69815	0.0894797	0.721929
ENSMUSG00000030685	Kctd13	104.097	0.271638	0.15912	1.70712	0.0877989	0.721929
ENSMUSG00000031344	Gabrq	178.856	-0.24974	0.146667	-1.70277	0.0886116	0.721929
ENSMUSG00000031367	Ap1s2	339.136	-0.256584	0.150305	-1.70709	0.0878057	0.721929
ENSMUSG00000032479	Map4	371.079	0.274451	0.160743	1.70739	0.0877487	0.721929
ENSMUSG00000039001	Rps21	132.666	0.274313	0.161398	1.6996	0.0892064	0.721929
ENSMUSG00000042699	Dhx9	2357.37	-0.213795	0.125746	-1.70021	0.0890906	0.721929
ENSMUSG00000046096	Mosmo	288.772	-0.228371	0.134089	-1.70312	0.0885449	0.721929
ENSMUSG00000047591	Mafa	1809.28	0.205857	0.120987	1.70147	0.0888539	0.721929
ENSMUSG00000060227	Casc4	170.374	-0.272681	0.160631	-1.69756	0.0895906	0.721929
ENSMUSG00000069170	Adgrv1	138.689	0.297037	0.174805	1.69925	0.089272	0.721929
ENSMUSG00000073423	Zfp414	225.906	-0.251176	0.147575	-1.70202	0.0887509	0.721929
ENSMUSG00000078652	Psme3	860.676	-0.201782	0.118605	-1.70129	0.0888883	0.721929
ENSMUSG00000028137	Celf3	829.306	0.186991	0.110347	1.69458	0.090156	0.723483
ENSMUSG00000028737	Aldh4a1	117.78	0.267968	0.158102	1.6949	0.0900942	0.723483
ENSMUSG00000037112	Sik2	123.251	0.30993	0.182852	1.69498	0.0900789	0.723483
ENSMUSG00000066036	Ubr4	3612.63	0.15904	0.0939889	1.69211	0.0906242	0.72624
ENSMUSG00000020649	Rrm2	412.011	-0.196458	0.11642	-1.68749	0.0915098	0.726343
ENSMUSG00000028207	Asph	370.661	0.204803	0.121344	1.6878	0.0914504	0.726343
ENSMUSG00000031016	Wee1	721.568	-0.175678	0.104047	-1.68845	0.0913247	0.726343
ENSMUSG00000037885	Stk35	4230.77	-0.166399	0.09852	-1.68898	0.0912228	0.726343
ENSMUSG00000038369	Ncoa6	310.989	-0.237245	0.140475	-1.68887	0.0912446	0.726343
ENSMUSG00000046982	Tshz1	1116.4	-0.201825	0.119559	-1.68808	0.0913962	0.726343
ENSMUSG00000086324	Gm15564	2341.92	-0.290849	0.17217	-1.68932	0.0911587	0.726343
ENSMUSG00000017376	Nlk	266.995	-0.237654	0.140911	-1.68656	0.0916889	0.726775
ENSMUSG00000048915	Efna5	732.981	-0.199345	0.118279	-1.68537	0.0919169	0.726853
ENSMUSG00000061607	Mdc1	369.916	-0.216388	0.128404	-1.68521	0.0919483	0.726853
ENSMUSG00000026754	Golga1	140.115	-0.258669	0.153594	-1.68411	0.0921598	0.727538
ENSMUSG00000020936	Nmt1	218.549	-0.262692	0.156116	-1.68267	0.0924385	0.727766
ENSMUSG00000037606	Osbpl5	293.564	0.233598	0.138784	1.68318	0.0923412	0.727766
ENSMUSG00000078851	Hist3h2a	157.341	-0.247945	0.147417	-1.68192	0.0925835	0.727924
ENSMUSG00000026853	Crat	402.646	-0.202639	0.120611	-1.68011	0.0929367	0.729716
ENSMUSG00000021594	Srd5a1	163.552	-0.235038	0.140004	-1.6788	0.0931907	0.729743
ENSMUSG00000028718	Stil	274.602	-0.217618	0.129619	-1.6789	0.0931711	0.729743
ENSMUSG00000020432	Tcn2	139.468	-0.271338	0.162024	-1.67467	0.0939981	0.732024
ENSMUSG00000028551	Cdkn2c	1055.95	-0.161643	0.0964909	-1.67522	0.0938916	0.732024
ENSMUSG00000028967	Errfi1	381.029	-0.215749	0.128737	-1.67589	0.0937604	0.732024
ENSMUSG00000042747	Krtcap2	224.301	-0.227404	0.135836	-1.6741	0.0941102	0.732024
ENSMUSG00000052102	Gnpda1	687.021	-0.183088	0.109202	-1.67661	0.0936197	0.732024
ENSMUSG00000003062	Stard3nl	229.5	0.259162	0.155022	1.67177	0.0945695	0.732498
ENSMUSG00000004394	Tmed4	457.214	-0.207541	0.124811	-1.66285	0.0963434	0.732498
ENSMUSG00000005469	Prkaca	530.3	-0.191233	0.115706	-1.65275	0.0983808	0.732498
ENSMUSG00000006273	Atp6v1b2	722.758	0.165757	0.100054	1.65667	0.0975865	0.732498
ENSMUSG00000011831	Evi5	179.915	-0.24599	0.149045	-1.65044	0.0988533	0.732498
ENSMUSG00000015971	Actr8	130.99	0.257555	0.155107	1.6605	0.0968136	0.732498
ENSMUSG00000019996	Map7	118.666	0.257568	0.155317	1.65834	0.0972488	0.732498
ENSMUSG00000020962	Gtf2a1	392.261	-0.202109	0.122551	-1.64919	0.0991085	0.732498
ENSMUSG00000024083	Pja2	335.588	-0.208501	0.124677	-1.67233	0.0944585	0.732498
ENSMUSG00000024180	Tmem8	434.558	-0.185986	0.112824	-1.64847	0.0992563	0.732498
ENSMUSG00000024472	Dcp2	485.424	-0.210412	0.126398	-1.66467	0.0959781	0.732498
ENSMUSG00000024601	Isoc1	197.574	-0.226218	0.135529	-1.66915	0.0950883	0.732498
ENSMUSG00000025132	Arhgdia	3840.3	-0.188084	0.112965	-1.66497	0.095918	0.732498
ENSMUSG00000025151	Maged1	1524.01	0.14172	0.0854786	1.65796	0.0973249	0.732498
ENSMUSG00000025228	Actr1a	527.158	0.184463	0.110541	1.66872	0.0951726	0.732498
ENSMUSG00000025404	R3hdm2	182.239	0.23296	0.14105	1.65162	0.0986121	0.732498
ENSMUSG00000027306	Nusap1	247.213	-0.24736	0.149786	-1.65142	0.0986524	0.732498
ENSMUSG00000028613	Lrp8	654.054	0.192285	0.115118	1.67033	0.094855	0.732498
ENSMUSG00000030031	Kbtbd8	103.332	-0.271216	0.164371	-1.65003	0.0989376	0.732498
ENSMUSG00000030867	Plk1	270.375	-0.212519	0.128482	-1.65408	0.098112	0.732498
ENSMUSG00000031479	Vps36	110.572	0.265885	0.15991	1.66272	0.0963689	0.732498
ENSMUSG00000031824	6430548M08Rik	893.276	0.174178	0.105477	1.65133	0.0986707	0.732498
ENSMUSG00000032009	Sesn3	694.188	0.199655	0.120912	1.65124	0.0986889	0.732498
ENSMUSG00000032481	Smarcc1	912.801	-0.202839	0.122561	-1.655	0.0979245	0.732498
ENSMUSG00000033411	Ctdspl2	251.493	-0.222082	0.133986	-1.6575	0.0974179	0.732498
ENSMUSG00000033487	Fndc3a	858.04	-0.214081	0.129751	-1.64994	0.0989545	0.732498
ENSMUSG00000033792	Atp7a	1233.41	-0.197301	0.11938	-1.65272	0.0983889	0.732498
ENSMUSG00000034574	Daam1	665.303	0.206518	0.124926	1.65313	0.0983049	0.732498
ENSMUSG00000037364	Srrt	196.608	-0.2289	0.138603	-1.65148	0.0986411	0.732498
ENSMUSG00000037905	Bri3bp	121.264	0.263557	0.159616	1.65119	0.0986991	0.732498
ENSMUSG00000037996	Slc24a2	488.142	0.186	0.11192	1.6619	0.0965325	0.732498
ENSMUSG00000038732	Mboat1	204.74	0.23224	0.139474	1.66511	0.0958905	0.732498
ENSMUSG00000039041	Adrm1	323.812	0.20968	0.126843	1.65306	0.098318	0.732498
ENSMUSG00000040455	Usp45	125.392	0.284289	0.170906	1.66342	0.0962283	0.732498
ENSMUSG00000046722	Cdc42se1	135.791	0.259702	0.155334	1.67189	0.094546	0.732498
ENSMUSG00000049751	Rpl36al	154.547	-0.269508	0.163523	-1.64813	0.099326	0.732498
ENSMUSG00000051043	Gprc5c	246.11	0.223642	0.134462	1.66323	0.0962657	0.732498
ENSMUSG00000058291	Zfp68	113.757	-0.261709	0.158755	-1.64851	0.0992482	0.732498
ENSMUSG00000062727	Hist1h2bk	241.327	-0.278643	0.168902	-1.64973	0.0989982	0.732498
ENSMUSG00000066621	Tecpr1	146.485	0.269586	0.163347	1.65038	0.0988647	0.732498
ENSMUSG00000079084	Ccdc82	119.578	0.299973	0.179697	1.66933	0.0950525	0.732498
ENSMUSG00000021756	Il6st	1693.2	-0.189305	0.114991	-1.64625	0.0997113	0.732613
ENSMUSG00000022587	Ly6e	123.814	-0.252702	0.153574	-1.64547	0.0998731	0.732613
ENSMUSG00000032115	Hyou1	2286.71	0.139913	0.0849437	1.64712	0.0995331	0.732613
ENSMUSG00000034163	Zfc3h1	332.581	-0.237439	0.14434	-1.645	0.0999703	0.732613
ENSMUSG00000103318	Gm38356	110.663	0.278198	0.169012	1.64602	0.09976	0.732613
ENSMUSG00000033526	Ppip5k1	245.831	0.206681	0.125795	1.64301	0.100382	0.734703
ENSMUSG00000024400	Wdr33	193.786	0.238584	0.145332	1.64165	0.100662	0.735431
ENSMUSG00000031753	Cog4	113.147	0.270949	0.165081	1.64131	0.100734	0.735431
ENSMUSG00000036197	Gxylt1	745.788	-0.179938	0.109784	-1.63901	0.10121	0.736725
ENSMUSG00000039678	Tbc1d13	267.109	-0.207135	0.126389	-1.63887	0.101241	0.736725
ENSMUSG00000045817	Zfp36l2	432.203	-0.200915	0.122611	-1.63863	0.10129	0.736725
ENSMUSG00000020687	Cdc27	405.956	-0.223406	0.136524	-1.63639	0.101758	0.739206
ENSMUSG00000025153	Fasn	913.729	0.181777	0.11124	1.63409	0.10224	0.739938
ENSMUSG00000037966	Ninj1	197.093	0.240491	0.147139	1.63445	0.102165	0.739938
ENSMUSG00000067038	Rps12-ps3	144.736	-0.288143	0.1763	-1.63439	0.102177	0.739938
ENSMUSG00000096210	H1f0	687.565	-0.175813	0.107686	-1.63265	0.102543	0.741209
ENSMUSG00000032285	Dnaja4	110.097	-0.253471	0.155336	-1.63176	0.102731	0.741646
ENSMUSG00000016534	Lamp2	702.468	-0.210959	0.129479	-1.62929	0.103252	0.741732
ENSMUSG00000023015	Racgap1	489.555	-0.183848	0.112816	-1.62962	0.103182	0.741732
ENSMUSG00000031320	Rps4x	286.539	-0.220952	0.13551	-1.63053	0.102991	0.741732
ENSMUSG00000073542	Cep76	144.497	-0.237903	0.145975	-1.62975	0.103155	0.741732
ENSMUSG00000029064	Gnb1	617.07	0.188896	0.116097	1.62705	0.103726	0.743304
ENSMUSG00000062825	Actg1	8606.26	-0.148811	0.0914522	-1.6272	0.103695	0.743304
ENSMUSG00000032575	Manf	502.999	-0.206969	0.127264	-1.6263	0.103887	0.743542
ENSMUSG00000030224	Strap	334.759	-0.198055	0.121995	-1.62346	0.104491	0.746041
ENSMUSG00000101972	Hist1h3i	256.971	-0.24832	0.152957	-1.62346	0.104492	0.746041
ENSMUSG00000030451	Herc2	816.853	0.193885	0.119566	1.62158	0.104894	0.747996
ENSMUSG00000026309	Ilkap	142.77	0.245167	0.151328	1.6201	0.10521	0.748419
ENSMUSG00000037426	Depdc5	206.02	-0.230536	0.142256	-1.62057	0.10511	0.748419
ENSMUSG00000024077	Strn	443.146	-0.195801	0.120954	-1.6188	0.10549	0.749492
ENSMUSG00000031447	Lamp1	1131.99	-0.205177	0.126842	-1.61758	0.105753	0.749537
ENSMUSG00000039168	Dap	335.775	-0.234175	0.144727	-1.61804	0.105653	0.749537
ENSMUSG00000041431	Ccnb1	754.547	-0.170337	0.105365	-1.61664	0.105956	0.750061
ENSMUSG00000003360	Ddx23	139.104	0.255864	0.158659	1.61267	0.106816	0.751505
ENSMUSG00000022841	Ap2m1	553.548	-0.178018	0.11038	-1.61277	0.106795	0.751505
ENSMUSG00000031950	Gabarapl2	270.711	0.228687	0.141724	1.61361	0.106612	0.751505
ENSMUSG00000036955	Kif1bp	165.876	0.236591	0.146596	1.61389	0.106551	0.751505
ENSMUSG00000041235	Chd7	884.861	0.1602	0.0993517	1.61245	0.106864	0.751505
ENSMUSG00000064351	mt-Co1	3592.57	-0.283372	0.175775	-1.61213	0.106934	0.751505
ENSMUSG00000000276	Dgke	143.845	0.235345	0.146316	1.60847	0.107732	0.753492
ENSMUSG00000020514	Mrpl22	125.463	-0.267595	0.166428	-1.60787	0.107863	0.753492
ENSMUSG00000039474	Wfs1	398.734	0.194854	0.121017	1.61013	0.107369	0.753492
ENSMUSG00000054702	Ap1s3	158.503	0.280487	0.17428	1.6094	0.107529	0.753492
ENSMUSG00000097340	Gm26617	131.364	-0.260389	0.161892	-1.60841	0.107745	0.753492
ENSMUSG00000032216	Nedd4	1023.7	-0.165903	0.103486	-1.60314	0.108904	0.759848
ENSMUSG00000079215	Zfp664	301.107	0.197553	0.123286	1.6024	0.109068	0.760082
ENSMUSG00000070493	Chchd2	252.285	0.217788	0.135971	1.60172	0.109217	0.760212
ENSMUSG00000031813	Mvb12a	169.39	0.234067	0.146302	1.59989	0.109623	0.761564
ENSMUSG00000062070	Pgk1	1354.2	-0.19903	0.124419	-1.59967	0.109673	0.761564
ENSMUSG00000018401	Mtmr4	389.972	0.189856	0.118798	1.59815	0.110009	0.762994
ENSMUSG00000025912	Mybl1	265.166	-0.231832	0.145229	-1.59632	0.110418	0.764914
ENSMUSG00000058153	Sez6l	1409.76	-0.169867	0.106451	-1.59573	0.110549	0.764914
ENSMUSG00000025289	Prdx4	449.16	-0.182438	0.114421	-1.59445	0.110834	0.76598
ENSMUSG00000068823	Csde1	560.988	-0.214191	0.134403	-1.59364	0.111016	0.766327
ENSMUSG00000005054	Cstb	146.778	-0.24803	0.155906	-1.59089	0.111634	0.767861
ENSMUSG00000022010	Tsc22d1	801.66	-0.177714	0.111698	-1.59103	0.111604	0.767861
ENSMUSG00000028842	Ago3	320.842	0.263953	0.165856	1.59146	0.111505	0.767861
ENSMUSG00000027184	Caprin1	636.903	0.172237	0.108411	1.58875	0.112118	0.768068
ENSMUSG00000030706	Mrpl48	123.049	0.288725	0.181637	1.58957	0.111933	0.768068
ENSMUSG00000031442	Mcf2l	712.733	0.172295	0.108403	1.58939	0.111973	0.768068
ENSMUSG00000049764	Zfp280b	680.851	-0.18981	0.119534	-1.58792	0.112304	0.768068
ENSMUSG00000070738	Dgkd	448.735	0.176427	0.111111	1.58784	0.112323	0.768068
ENSMUSG00000005225	Plekha8	436.708	-0.183136	0.115771	-1.58189	0.113676	0.769614
ENSMUSG00000022186	Oxct1	584.002	-0.230193	0.145528	-1.58178	0.1137	0.769614
ENSMUSG00000031729	Ist1	922.66	0.147812	0.0934567	1.58161	0.113738	0.769614
ENSMUSG00000038976	Ppp1r9b	378.764	0.179734	0.113577	1.58249	0.113537	0.769614
ENSMUSG00000042410	Agps	134.809	0.241491	0.152313	1.58549	0.112855	0.769614
ENSMUSG00000044254	Pcsk9	530.768	0.177545	0.112228	1.58201	0.113648	0.769614
ENSMUSG00000045039	Megf8	353.92	0.185556	0.117101	1.58459	0.113061	0.769614
ENSMUSG00000047213	Ythdf3	413.886	0.178366	0.112685	1.58287	0.11345	0.769614
ENSMUSG00000052727	Map1b	1386.43	-0.168806	0.106492	-1.58515	0.112932	0.769614
ENSMUSG00000038319	Kcnh2	141.752	0.238381	0.150794	1.58084	0.113914	0.769912
ENSMUSG00000024976	Shoc2	292.536	-0.221262	0.140288	-1.5772	0.11475	0.773671
ENSMUSG00000030327	Necap1	905.4	-0.209296	0.132678	-1.57748	0.114686	0.773671
ENSMUSG00000058006	Mdn1	406.447	-0.225196	0.142829	-1.57668	0.114869	0.773671
ENSMUSG00000037341	Slc9a7	223.923	0.21265	0.134932	1.57597	0.115032	0.773874
ENSMUSG00000004032	Gstm5	122.257	-0.240861	0.153269	-1.57149	0.116068	0.774679
ENSMUSG00000020130	Tbc1d15	174.163	-0.239995	0.152604	-1.57267	0.115796	0.774679
ENSMUSG00000021730	Hcn1	103.721	-0.247633	0.157562	-1.57165	0.116031	0.774679
ENSMUSG00000026354	Lct	204.263	0.242047	0.153923	1.57252	0.115831	0.774679
ENSMUSG00000038486	Sv2a	746.897	0.152356	0.0968002	1.57392	0.115506	0.774679
ENSMUSG00000038718	Pbx3	1360.89	-0.193913	0.123399	-1.57143	0.116082	0.774679
ENSMUSG00000054823	Nsd3	165.86	-0.223622	0.142199	-1.5726	0.115811	0.774679
ENSMUSG00000020823	Sec14l1	260.574	-0.197678	0.125882	-1.57034	0.116335	0.775477
ENSMUSG00000021996	Esd	455.574	-0.179592	0.114458	-1.56906	0.116633	0.776042
ENSMUSG00000031826	Usp10	524.121	-0.20104	0.128206	-1.5681	0.116857	0.776042
ENSMUSG00000037369	Kdm6a	740.463	-0.195389	0.124548	-1.56879	0.116698	0.776042
ENSMUSG00000053477	Tcf4	392.306	-0.182355	0.11632	-1.56769	0.116952	0.776042
ENSMUSG00000025745	Hadha	238.418	0.226004	0.144408	1.56504	0.117573	0.778389
ENSMUSG00000029726	Mepce	234.674	0.208321	0.133096	1.5652	0.117536	0.778389
ENSMUSG00000020376	Rnf130	296.875	-0.201866	0.129086	-1.56382	0.117861	0.778521
ENSMUSG00000062373	Tmem65	719.053	-0.177333	0.113371	-1.56418	0.117776	0.778521
ENSMUSG00000005893	Nr2c2	294.26	-0.194946	0.124894	-1.56089	0.118549	0.780416
ENSMUSG00000021962	Dcp1a	232.083	-0.223384	0.143094	-1.5611	0.1185	0.780416
ENSMUSG00000062115	Rai1	268.38	0.201845	0.12923	1.5619	0.118311	0.780416
ENSMUSG00000018412	Kansl1	479.201	-0.183316	0.118015	-1.55333	0.120345	0.789561
ENSMUSG00000036432	Siah2	413.949	-0.177964	0.114556	-1.55351	0.120302	0.789561
ENSMUSG00000062169	Cnih4	274.669	-0.236584	0.152293	-1.55348	0.120309	0.789561
ENSMUSG00000006699	Cdc42	814.855	-0.195921	0.126421	-1.54975	0.121201	0.79116
ENSMUSG00000019087	Atp6ap1	1325.42	-0.171321	0.110447	-1.55116	0.120863	0.79116
ENSMUSG00000022350	Washc5	367.47	-0.205977	0.132859	-1.55035	0.121057	0.79116
ENSMUSG00000023010	Tmbim6	1730.4	-0.133221	0.0860084	-1.54893	0.121398	0.79116
ENSMUSG00000038970	Lmtk2	366.758	-0.177316	0.114478	-1.54891	0.121404	0.79116
ENSMUSG00000049680	Urgcp	130.644	0.25987	0.167652	1.55006	0.121128	0.79116
ENSMUSG00000004347	Pde1c	476.548	-0.172545	0.111466	-1.54796	0.121632	0.791161
ENSMUSG00000020108	Ddit4	378.908	-0.210597	0.13652	-1.54261	0.122926	0.791161
ENSMUSG00000020657	Dnajc27	236.437	0.20255	0.131579	1.53938	0.123712	0.791161
ENSMUSG00000021264	Yy1	193.757	-0.2119	0.137352	-1.54276	0.122889	0.791161
ENSMUSG00000021910	Nisch	1067.78	0.152575	0.0991027	1.53956	0.123667	0.791161
ENSMUSG00000024795	Kif20b	158.746	-0.237089	0.153517	-1.54439	0.122495	0.791161
ENSMUSG00000025007	Aldh18a1	181.977	-0.22967	0.148899	-1.54245	0.122963	0.791161
ENSMUSG00000026238	Ptma	1349.32	-0.15013	0.0970954	-1.54621	0.122054	0.791161
ENSMUSG00000026640	Plxna2	153.421	0.255787	0.165717	1.54352	0.122705	0.791161
ENSMUSG00000029439	Sfswap	224.844	0.205436	0.133353	1.54054	0.123428	0.791161
ENSMUSG00000029780	Nt5c3	191.615	-0.224093	0.14548	-1.54037	0.12347	0.791161
ENSMUSG00000030447	Cyfip1	419.265	0.185472	0.120064	1.54478	0.122399	0.791161
ENSMUSG00000032261	Sh3bgrl2	136.185	-0.242446	0.157077	-1.54348	0.122714	0.791161
ENSMUSG00000034168	Irf2bpl	225.44	-0.197824	0.128093	-1.54438	0.122497	0.791161
ENSMUSG00000036966	Spryd3	272.6	0.203908	0.132229	1.54208	0.123054	0.791161
ENSMUSG00000043384	Gprasp1	138.12	-0.234373	0.152072	-1.54119	0.12327	0.791161
ENSMUSG00000078784	1810022K09Rik	114.044	-0.276323	0.178642	-1.5468	0.121911	0.791161
ENSMUSG00000026311	Asb1	259.173	0.199089	0.129384	1.53874	0.123867	0.791282
ENSMUSG00000044788	Fads6	233.588	0.203835	0.132536	1.53796	0.124058	0.791631
ENSMUSG00000037750	Fam222b	801.318	-0.219502	0.142779	-1.53735	0.124207	0.791721
ENSMUSG00000036427	Gpi1	586.972	-0.175295	0.114114	-1.53613	0.124506	0.792754
ENSMUSG00000021218	Gdi2	903.068	-0.18647	0.121828	-1.5306	0.125868	0.792764
ENSMUSG00000025195	Dnmbp	155.84	-0.236925	0.154774	-1.53078	0.125824	0.792764
ENSMUSG00000026361	Cdc73	185.617	-0.244082	0.159126	-1.5339	0.125055	0.792764
ENSMUSG00000035530	Eif1	859.587	-0.204246	0.133096	-1.53457	0.124889	0.792764
ENSMUSG00000038902	Pogz	626.354	-0.18362	0.119883	-1.53165	0.125608	0.792764
ENSMUSG00000044496	2510039O18Rik	351.008	0.195788	0.127796	1.53204	0.125513	0.792764
ENSMUSG00000055447	Cd47	615.537	0.196847	0.128551	1.53128	0.125701	0.792764
ENSMUSG00000056201	Cfl1	756.315	-0.166159	0.108396	-1.53289	0.125302	0.792764
ENSMUSG00000059119	Nap1l4	199.804	-0.236873	0.15431	-1.53504	0.124774	0.792764
ENSMUSG00000070343	Gm10288	121.18	-0.266198	0.173839	-1.53129	0.125697	0.792764
ENSMUSG00000019173	Rab5c	727.204	-0.166792	0.10905	-1.52951	0.126139	0.793592
ENSMUSG00000020876	Snx11	115.652	0.23787	0.155575	1.52897	0.126272	0.793592
ENSMUSG00000020935	Dcakd	233.935	-0.21657	0.141732	-1.52803	0.126506	0.794205
ENSMUSG00000001440	Kpnb1	932.915	0.188127	0.125416	1.50003	0.133606	0.795288
ENSMUSG00000001632	Brpf1	173.152	0.218307	0.146793	1.48718	0.136967	0.795288
ENSMUSG00000001847	Rac1	454.539	-0.169479	0.114221	-1.48379	0.137866	0.795288
ENSMUSG00000003234	Abcf3	118.053	-0.237013	0.160682	-1.47505	0.1402	0.795288
ENSMUSG00000005481	Ddx39	183.402	-0.207342	0.139072	-1.4909	0.135987	0.795288
ENSMUSG00000006373	Pgrmc1	215.181	-0.222127	0.147865	-1.50223	0.133036	0.795288
ENSMUSG00000006586	Runx1t1	597.892	-0.173079	0.115091	-1.50385	0.132621	0.795288
ENSMUSG00000008604	Ubqln4	168.749	-0.213656	0.141659	-1.50824	0.131494	0.795288
ENSMUSG00000009112	Bcl2l13	150.582	0.24777	0.162527	1.52448	0.127388	0.795288
ENSMUSG00000009907	Vps4b	210.194	0.229052	0.152047	1.50646	0.13195	0.795288
ENSMUSG00000015401	Cltrn	313.636	-0.203779	0.134757	-1.51219	0.130485	0.795288
ENSMUSG00000015474	Ppt2	851.633	0.176582	0.116767	1.51226	0.130468	0.795288
ENSMUSG00000015488	Cacfd1	235.803	0.198567	0.133685	1.48534	0.137454	0.795288
ENSMUSG00000015750	Aph1a	183.037	0.206485	0.136211	1.51592	0.129539	0.795288
ENSMUSG00000016200	Syt14	162.5	-0.220913	0.148169	-1.49095	0.135975	0.795288
ENSMUSG00000020109	Dnajb12	136.641	-0.235065	0.155915	-1.50765	0.131644	0.795288
ENSMUSG00000020170	Frs2	243.106	-0.207551	0.140402	-1.47826	0.139338	0.795288
ENSMUSG00000020387	Jade2	150.251	0.214773	0.145944	1.47161	0.141126	0.795288
ENSMUSG00000020482	Ccdc117	166.474	0.207501	0.140787	1.47387	0.140517	0.795288
ENSMUSG00000020661	Dnmt3a	2053.77	0.142722	0.0968664	1.47338	0.140647	0.795288
ENSMUSG00000021000	Mia2	197.608	0.218694	0.144226	1.51633	0.129436	0.795288
ENSMUSG00000021054	Sgpp1	580.134	-0.160388	0.106125	-1.51131	0.13071	0.795288
ENSMUSG00000021213	Akr1c13	205.103	0.217272	0.143161	1.51767	0.129097	0.795288
ENSMUSG00000021236	Entpd5	187.932	0.211691	0.139408	1.5185	0.128888	0.795288
ENSMUSG00000021591	Glrx	984.902	-0.20012	0.135884	-1.47273	0.140824	0.795288
ENSMUSG00000021636	Marveld2	217.663	-0.196586	0.132697	-1.48147	0.138483	0.795288
ENSMUSG00000022016	Akap11	546.306	-0.18602	0.122583	-1.5175	0.129141	0.795288
ENSMUSG00000022108	Itm2b	499.2	-0.18782	0.126264	-1.48752	0.136877	0.795288
ENSMUSG00000022191	Drosha	146.688	-0.225852	0.152452	-1.48146	0.138484	0.795288
ENSMUSG00000022358	Fbxo32	115.66	-0.235027	0.157343	-1.49373	0.135247	0.795288
ENSMUSG00000022462	Slc38a2	2179.15	-0.17488	0.11697	-1.49509	0.134891	0.795288
ENSMUSG00000024217	Snrpc	109.635	-0.237896	0.161129	-1.47643	0.139828	0.795288
ENSMUSG00000024304	Cdh2	500.238	-0.207006	0.137289	-1.50781	0.131604	0.795288
ENSMUSG00000024308	Tapbp	305.016	0.193394	0.127132	1.52121	0.128207	0.795288
ENSMUSG00000024642	Tle4	114.234	-0.235035	0.159366	-1.47481	0.140264	0.795288
ENSMUSG00000024769	Cdc42bpg	175.46	0.22518	0.149989	1.50131	0.133275	0.795288
ENSMUSG00000025159	Mms19	180.518	0.240205	0.162937	1.47422	0.140423	0.795288
ENSMUSG00000025362	Rps26	284.228	-0.22732	0.152403	-1.49157	0.135813	0.795288
ENSMUSG00000025626	Phf6	179.664	-0.235909	0.159345	-1.48049	0.138742	0.795288
ENSMUSG00000025758	Plk4	284.874	-0.200675	0.136371	-1.47153	0.141148	0.795288
ENSMUSG00000025880	Smad7	340.913	-0.217626	0.144454	-1.50654	0.131927	0.795288
ENSMUSG00000026017	Carf	188.159	-0.229103	0.150322	-1.52408	0.127489	0.795288
ENSMUSG00000026605	Cenpf	202.925	0.239716	0.158524	1.51217	0.13049	0.795288
ENSMUSG00000026739	Bmi1	144.771	-0.239052	0.158608	-1.50719	0.131763	0.795288
ENSMUSG00000027613	Eif6	171.922	0.23052	0.155397	1.48343	0.137961	0.795288
ENSMUSG00000028465	Tln1	442.834	0.21671	0.145822	1.48613	0.137245	0.795288
ENSMUSG00000029071	Dvl1	108.28	0.235161	0.155416	1.51311	0.130252	0.795288
ENSMUSG00000029174	Tbc1d1	376.648	0.188479	0.126269	1.49268	0.135522	0.795288
ENSMUSG00000029366	Dck	315.497	-0.209426	0.141825	-1.47665	0.13977	0.795288
ENSMUSG00000029470	P2rx4	260.242	0.187044	0.124006	1.50835	0.131464	0.795288
ENSMUSG00000030346	Rad51ap1	259.159	-0.200037	0.132103	-1.51425	0.129962	0.795288
ENSMUSG00000030432	Rpl28	460.075	-0.216916	0.146239	-1.4833	0.137996	0.795288
ENSMUSG00000030691	Fchsd2	125.587	0.245519	0.163351	1.50302	0.132835	0.795288
ENSMUSG00000031628	Casp3	274.474	-0.189747	0.128767	-1.47358	0.140596	0.795288
ENSMUSG00000031955	Bcar1	336.247	0.175403	0.117172	1.49697	0.134401	0.795288
ENSMUSG00000031993	Snx19	161.364	0.219139	0.144152	1.52019	0.128463	0.795288
ENSMUSG00000032199	Polr2m	384.355	-0.192128	0.127828	-1.50302	0.132835	0.795288
ENSMUSG00000032328	Tmem30a	460.998	-0.174899	0.118088	-1.48108	0.138584	0.795288
ENSMUSG00000032349	Elovl5	769.644	-0.217559	0.146401	-1.48605	0.137267	0.795288
ENSMUSG00000032356	Rasgrf1	359.892	-0.183078	0.120152	-1.52373	0.127577	0.795288
ENSMUSG00000032431	Crtap	131.125	0.229105	0.155116	1.47699	0.139679	0.795288
ENSMUSG00000032580	Rbm5	252.992	-0.197221	0.129222	-1.52622	0.126956	0.795288
ENSMUSG00000032788	Pdxk	211.842	0.200208	0.131779	1.51927	0.128694	0.795288
ENSMUSG00000033047	Eif3l	437.013	-0.211653	0.141595	-1.49478	0.134972	0.795288
ENSMUSG00000033416	Gucd1	302.221	0.190076	0.126121	1.50709	0.131787	0.795288
ENSMUSG00000033799	Fam208b	257.977	-0.208675	0.137805	-1.51428	0.129955	0.795288
ENSMUSG00000034863	Ano8	200.889	0.210887	0.138497	1.52269	0.127836	0.795288
ENSMUSG00000034868	Myl12b	156.385	-0.262748	0.176726	-1.48675	0.13708	0.795288
ENSMUSG00000035133	Arhgap5	167.97	-0.230556	0.155931	-1.47857	0.139254	0.795288
ENSMUSG00000035674	Ndufa3	1154.33	-0.15909	0.107185	-1.48426	0.13774	0.795288
ENSMUSG00000037020	Wdr62	174.581	0.212986	0.142847	1.49101	0.135958	0.795288
ENSMUSG00000037979	Ccdc92	110.104	0.236534	0.158539	1.49196	0.135709	0.795288
ENSMUSG00000038141	Tmem181a	320.025	-0.186801	0.12617	-1.48054	0.138729	0.795288
ENSMUSG00000038545	Cul7	155.841	0.235937	0.158665	1.48701	0.137012	0.795288
ENSMUSG00000038759	Nup205	380.623	-0.177763	0.117124	-1.51774	0.12908	0.795288
ENSMUSG00000038861	Pi4kb	128.023	-0.242045	0.160491	-1.50815	0.131515	0.795288
ENSMUSG00000039473	Ubn1	573.589	0.158141	0.106646	1.48286	0.138113	0.795288
ENSMUSG00000039865	Slc44a3	290.652	-0.200674	0.135223	-1.48403	0.137801	0.795288
ENSMUSG00000040620	Dhx33	243.658	-0.211364	0.14156	-1.4931	0.13541	0.795288
ENSMUSG00000041697	Cox6a1	870.932	0.180491	0.120841	1.49363	0.135274	0.795288
ENSMUSG00000041841	Rpl37	123.415	-0.265216	0.176335	-1.50405	0.132569	0.795288
ENSMUSG00000042032	Mat2b	345.189	-0.173375	0.115601	-1.49978	0.133671	0.795288
ENSMUSG00000042207	Kdm5b	184.681	-0.203061	0.136693	-1.48552	0.137406	0.795288
ENSMUSG00000042249	Grk3	227.048	-0.21507	0.141339	-1.52166	0.128093	0.795288
ENSMUSG00000043279	Trim56	111.661	-0.250596	0.16807	-1.49102	0.135956	0.795288
ENSMUSG00000043535	Setx	417.344	-0.188207	0.125967	-1.4941	0.13515	0.795288
ENSMUSG00000044365	Cxxc4	239.733	-0.207967	0.141278	-1.47204	0.141011	0.795288
ENSMUSG00000047534	Mis18bp1	133.006	-0.23936	0.160293	-1.49327	0.135367	0.795288
ENSMUSG00000048249	Crebrf	202.685	-0.231927	0.154278	-1.5033	0.132761	0.795288
ENSMUSG00000048578	Mlec	1332.16	0.14515	0.096882	1.49822	0.134077	0.795288
ENSMUSG00000049422	Chchd10	225.093	-0.217849	0.14772	-1.47474	0.140282	0.795288
ENSMUSG00000051166	Eml5	587.663	0.160372	0.105487	1.52029	0.128437	0.795288
ENSMUSG00000051390	Zbtb22	156.342	0.218702	0.146515	1.49269	0.135517	0.795288
ENSMUSG00000053641	Dennd4a	175.761	0.235888	0.159614	1.47786	0.139445	0.795288
ENSMUSG00000055485	Soga1	404.437	0.184646	0.121637	1.518	0.129014	0.795288
ENSMUSG00000055531	Cpsf6	234.668	0.204764	0.138399	1.47952	0.139002	0.795288
ENSMUSG00000056665	Them6	108.936	0.244474	0.162201	1.50722	0.131754	0.795288
ENSMUSG00000060147	Serpinb6a	268.389	-0.19827	0.134008	-1.47953	0.138998	0.795288
ENSMUSG00000060450	Rnf14	399	-0.176948	0.119182	-1.48469	0.137627	0.795288
ENSMUSG00000064337	mt-Rnr1	209607	-0.26819	0.175861	-1.52501	0.127256	0.795288
ENSMUSG00000064345	mt-Nd2	817.105	-0.21107	0.140203	-1.50546	0.132206	0.795288
ENSMUSG00000069227	Gprin1	126.093	0.231184	0.15327	1.50835	0.131466	0.795288
ENSMUSG00000072694	1500011B03Rik	214.882	-0.199819	0.134364	-1.48714	0.136977	0.795288
ENSMUSG00000079641	Rpl39	483.494	0.188182	0.125758	1.49639	0.134553	0.795288
ENSMUSG00000101609	Kcnq1ot1	557.748	0.25825	0.171094	1.5094	0.131196	0.795288
ENSMUSG00000107268	Cdc42bpg	174.989	0.226168	0.150281	1.50497	0.132333	0.795288
ENSMUSG00000052428	Tmco1	181.93	-0.247077	0.168064	-1.47013	0.141526	0.796647
ENSMUSG00000027363	Usp8	212.531	-0.205987	0.140194	-1.4693	0.14175	0.797141
ENSMUSG00000000394	Gcg	461.588	-0.189214	0.128916	-1.46773	0.142178	0.79826
ENSMUSG00000023915	Tnfrsf21	114.953	-0.225463	0.153638	-1.4675	0.142241	0.79826
ENSMUSG00000025451	Paip1	161.715	-0.218992	0.149273	-1.46706	0.14236	0.79826
ENSMUSG00000019873	Reep3	207.108	-0.199655	0.136713	-1.46039	0.144182	0.799077
ENSMUSG00000019951	Uhrf1bp1l	191.222	-0.206225	0.141305	-1.45943	0.144447	0.799077
ENSMUSG00000023021	Cers5	188.887	-0.204948	0.140034	-1.46356	0.143314	0.799077
ENSMUSG00000026833	Olfm1	202.338	-0.206609	0.141495	-1.46019	0.144238	0.799077
ENSMUSG00000028977	Casz1	293.034	-0.180532	0.123706	-1.45936	0.144465	0.799077
ENSMUSG00000037936	Scarb1	159.918	0.208712	0.142925	1.46029	0.144209	0.799077
ENSMUSG00000040007	Bahd1	158.282	-0.224163	0.15341	-1.4612	0.14396	0.799077
ENSMUSG00000040021	Lats1	447.084	-0.188767	0.129082	-1.46238	0.143637	0.799077
ENSMUSG00000040390	Map3k10	138.377	0.229553	0.157135	1.46086	0.144053	0.799077
ENSMUSG00000048796	Cyb561d1	285.603	0.18167	0.124455	1.45972	0.144366	0.799077
ENSMUSG00000062380	Tubb3	302.548	0.185671	0.127078	1.46108	0.143993	0.799077
ENSMUSG00000068240	Gm11808	110.776	-0.257874	0.175963	-1.4655	0.142785	0.799077
ENSMUSG00000071650	Ganab	1305.51	-0.144495	0.0989618	-1.46011	0.14426	0.799077
ENSMUSG00000105827	Hist2h2bb	103.366	-0.242097	0.165626	-1.46171	0.143822	0.799077
ENSMUSG00000109511	Nup62	644.36	-0.173127	0.118661	-1.45901	0.144564	0.799077
ENSMUSG00000000028	Cdc45	128.541	-0.222993	0.153899	-1.44896	0.147348	0.799926
ENSMUSG00000000804	Usp32	233.831	0.190501	0.131568	1.44793	0.147637	0.799926
ENSMUSG00000006740	Kif5b	266.308	-0.184571	0.127463	-1.44803	0.147608	0.799926
ENSMUSG00000014550	Rbsn	123.394	0.234366	0.161951	1.44714	0.147859	0.799926
ENSMUSG00000015189	Casd1	244.111	-0.188129	0.12928	-1.45521	0.145612	0.799926
ENSMUSG00000022201	Zfr	215.525	-0.203975	0.140957	-1.44708	0.147875	0.799926
ENSMUSG00000025495	Ptdss2	109.964	0.24746	0.170474	1.45159	0.146615	0.799926
ENSMUSG00000027650	Tti1	166.881	-0.217322	0.149822	-1.45054	0.146909	0.799926
ENSMUSG00000027710	Acad9	152.602	0.25594	0.17643	1.45066	0.146875	0.799926
ENSMUSG00000028399	Ptprd	483.99	-0.171243	0.118161	-1.44923	0.147274	0.799926
ENSMUSG00000028849	Map7d1	300.236	0.176699	0.121233	1.45751	0.144976	0.799926
ENSMUSG00000031255	Sytl4	828.555	-0.146881	0.101138	-1.45229	0.146421	0.799926
ENSMUSG00000035151	Elmod2	236.812	0.182699	0.125368	1.4573	0.145034	0.799926
ENSMUSG00000035354	Uvrag	119.413	0.252061	0.173689	1.45122	0.146718	0.799926
ENSMUSG00000035376	Hacd2	155.13	-0.239914	0.165788	-1.44711	0.147867	0.799926
ENSMUSG00000035390	Brsk1	320.757	0.175781	0.121447	1.44739	0.147789	0.799926
ENSMUSG00000037720	Tmem33	376.5	-0.197817	0.135976	-1.45479	0.145726	0.799926
ENSMUSG00000039157	Fam102a	296.328	0.180916	0.12496	1.44779	0.147675	0.799926
ENSMUSG00000042246	Tmc7	383.306	-0.17815	0.122365	-1.45589	0.145422	0.799926
ENSMUSG00000059291	Rpl11	493.038	0.154618	0.106575	1.45079	0.146838	0.799926
ENSMUSG00000060373	Hnrnpc	414.464	-0.178087	0.122853	-1.4496	0.14717	0.799926
ENSMUSG00000068748	Ptprz1	331.811	-0.226153	0.15552	-1.45418	0.145897	0.799926
ENSMUSG00000090112	Shprh	141.957	0.218335	0.150736	1.44845	0.14749	0.799926
ENSMUSG00000023965	Fbxl17	116.818	0.229199	0.158511	1.44595	0.148192	0.800895
ENSMUSG00000003731	Kpna6	390.276	0.165289	0.114441	1.44432	0.148649	0.80096
ENSMUSG00000027668	Mfn1	175.074	-0.209258	0.145013	-1.44302	0.149014	0.80096
ENSMUSG00000027782	Kpna4	196.496	-0.205896	0.142695	-1.44291	0.149047	0.80096
ENSMUSG00000031351	Zfp185	213.587	-0.204827	0.141735	-1.44514	0.148418	0.80096
ENSMUSG00000039148	Sart1	135.873	0.228669	0.158578	1.442	0.149304	0.80096
ENSMUSG00000040929	Rfx3	184.136	0.213124	0.147654	1.4434	0.148907	0.80096
ENSMUSG00000050148	Ubqln2	370.981	-0.204851	0.141833	-1.44431	0.148652	0.80096
ENSMUSG00000110693	Gm45899	141.244	0.254111	0.176212	1.44207	0.149282	0.80096
ENSMUSG00000029191	Rfc1	169.093	-0.214133	0.148679	-1.44024	0.149801	0.801413
ENSMUSG00000041891	Lman1	1139.14	-0.174666	0.121275	-1.44025	0.149795	0.801413
ENSMUSG00000070327	Rnf213	347.819	-0.218667	0.1518	-1.4405	0.149726	0.801413
ENSMUSG00000000202	Btbd17	115.443	0.22213	0.154395	1.43871	0.150234	0.802423
ENSMUSG00000002870	Mcm2	531.497	-0.155062	0.108002	-1.43574	0.151077	0.802423
ENSMUSG00000025369	Smarcc2	499.585	-0.180714	0.125899	-1.43539	0.151177	0.802423
ENSMUSG00000028680	Plk3	862.702	-0.164215	0.114298	-1.43673	0.150796	0.802423
ENSMUSG00000030894	Tpp1	478.925	0.163964	0.11424	1.43525	0.151215	0.802423
ENSMUSG00000042688	Mapk6	576.473	-0.176519	0.12274	-1.43815	0.150391	0.802423
ENSMUSG00000046404	Yod1	662.807	-0.18421	0.128351	-1.4352	0.151229	0.802423
ENSMUSG00000058355	Abce1	453.082	-0.179464	0.125041	-1.43525	0.151217	0.802423
ENSMUSG00000073982	Rhog	181.83	-0.233671	0.162508	-1.4379	0.150461	0.802423
ENSMUSG00000000078	Klf6	139.845	-0.216668	0.153791	-1.40885	0.15888	0.802635
ENSMUSG00000000088	Cox5a	1318.9	-0.153048	0.10853	-1.4102	0.158481	0.802635
ENSMUSG00000000346	Dazap2	285.851	-0.205076	0.143953	-1.4246	0.154274	0.802635
ENSMUSG00000000561	Wdr77	120.049	0.217839	0.157426	1.38375	0.166434	0.802635
ENSMUSG00000000631	Myo18a	204.703	0.218519	0.158156	1.38167	0.167072	0.802635
ENSMUSG00000001082	Mfsd10	669.371	-0.169177	0.122008	-1.3866	0.165565	0.802635
ENSMUSG00000001424	Snd1	946.51	0.165063	0.118036	1.39841	0.161989	0.802635
ENSMUSG00000001517	Foxm1	241.049	-0.183244	0.134044	-1.36704	0.171613	0.802635
ENSMUSG00000001794	Capns1	658.211	-0.176212	0.127881	-1.37794	0.168223	0.802635
ENSMUSG00000003810	Mast2	285.693	0.172918	0.123039	1.40539	0.159904	0.802635
ENSMUSG00000004031	Brinp2	202.251	0.187694	0.131392	1.42851	0.153146	0.802635
ENSMUSG00000004661	Arid3b	579.594	-0.164891	0.120143	-1.37246	0.169922	0.802635
ENSMUSG00000005198	Polr2a	660.037	-0.158827	0.112707	-1.4092	0.158775	0.802635
ENSMUSG00000005774	Rfx5	105.057	-0.235291	0.169927	-1.38466	0.166156	0.802635
ENSMUSG00000007080	Pole	192.773	0.197501	0.142409	1.38686	0.165484	0.802635
ENSMUSG00000007850	Hnrnph1	339.801	0.169159	0.12398	1.36441	0.172439	0.802635
ENSMUSG00000008730	Hipk1	366.368	-0.188586	0.13558	-1.39095	0.16424	0.802635
ENSMUSG00000009378	Slc16a12	3223.36	-0.174228	0.127217	-1.36953	0.170833	0.802635
ENSMUSG00000012422	Tmem167	506.093	-0.201026	0.140267	-1.43317	0.15181	0.802635
ENSMUSG00000015342	Xk	113.817	-0.231213	0.166255	-1.39071	0.164312	0.802635
ENSMUSG00000015749	Anp32e	571.674	0.182684	0.12839	1.42288	0.15477	0.802635
ENSMUSG00000016619	Nup50	667.34	-0.149605	0.107987	-1.3854	0.165931	0.802635
ENSMUSG00000017707	Serinc3	1766.43	-0.181244	0.127583	-1.42059	0.155435	0.802635
ENSMUSG00000020255	D10Wsu102e	2792.02	0.253583	0.180853	1.40215	0.160871	0.802635
ENSMUSG00000020496	Rnf187	415.735	0.195545	0.140338	1.39339	0.163503	0.802635
ENSMUSG00000020733	Slc9a3r1	360.6	-0.162187	0.11625	-1.39516	0.162969	0.802635
ENSMUSG00000020863	Luc7l3	110.736	0.227308	0.16413	1.38493	0.166074	0.802635
ENSMUSG00000021072	Tmx1	256.946	0.210805	0.152148	1.38553	0.165892	0.802635
ENSMUSG00000021241	Isca2	121.057	-0.232373	0.163893	-1.41783	0.15624	0.802635
ENSMUSG00000021258	Ccnk	123.078	-0.226527	0.159626	-1.41911	0.155867	0.802635
ENSMUSG00000021451	Sema4d	332.26	0.205029	0.145115	1.41287	0.157694	0.802635
ENSMUSG00000021670	Hmgcr	1639.32	0.173075	0.126484	1.36835	0.171201	0.802635
ENSMUSG00000022228	Zscan26	120.06	0.227953	0.158954	1.43408	0.15155	0.802635
ENSMUSG00000022426	Josd1	240.977	0.18476	0.131561	1.40436	0.160211	0.802635
ENSMUSG00000022814	Umps	308.392	-0.197756	0.140753	-1.40499	0.160026	0.802635
ENSMUSG00000024098	Twsg1	491.81	-0.167764	0.122795	-1.36621	0.171872	0.802635
ENSMUSG00000024283	Wac	233.983	-0.192756	0.136514	-1.41198	0.157955	0.802635
ENSMUSG00000024294	Mib1	749.81	0.13152	0.0963742	1.36468	0.172354	0.802635
ENSMUSG00000024427	Spry4	473.366	-0.16754	0.119519	-1.40178	0.16098	0.802635
ENSMUSG00000024486	Hbegf	120.53	-0.214226	0.155359	-1.37891	0.167922	0.802635
ENSMUSG00000024826	Dpf2	270.426	0.190033	0.135239	1.40516	0.159973	0.802635
ENSMUSG00000025423	Pias2	123.693	-0.233264	0.166632	-1.39988	0.16155	0.802635
ENSMUSG00000025439	Clns1a	196.856	-0.192435	0.13706	-1.40402	0.160313	0.802635
ENSMUSG00000025484	Bet1l	192.312	-0.202146	0.141133	-1.43231	0.152056	0.802635
ENSMUSG00000025743	Sdc3	133.998	-0.220815	0.155555	-1.41953	0.155743	0.802635
ENSMUSG00000025907	Rb1cc1	472.048	-0.156038	0.112949	-1.38149	0.167128	0.802635
ENSMUSG00000026107	Nabp1	368.277	-0.193048	0.139451	-1.38434	0.166254	0.802635
ENSMUSG00000026610	Esrrg	326.377	-0.174578	0.123564	-1.41286	0.157697	0.802635
ENSMUSG00000026670	Uap1	201.074	0.192054	0.135347	1.41897	0.155907	0.802635
ENSMUSG00000026788	Zbtb43	179.4	-0.217174	0.153188	-1.4177	0.156278	0.802635
ENSMUSG00000026834	Acvr1c	505.533	0.173359	0.126052	1.37529	0.169041	0.802635
ENSMUSG00000027086	Fastkd1	287.374	-0.184889	0.134839	-1.37118	0.170319	0.802635
ENSMUSG00000027132	Katnbl1	106.704	-0.221938	0.160969	-1.37876	0.167967	0.802635
ENSMUSG00000027163	Commd9	182.522	-0.191144	0.139018	-1.37496	0.169143	0.802635
ENSMUSG00000027207	Galk2	111.988	0.218193	0.156731	1.39216	0.163875	0.802635
ENSMUSG00000027469	Tpx2	307.225	-0.168106	0.121907	-1.37897	0.167904	0.802635
ENSMUSG00000027597	Ahcy	151.006	0.218856	0.155193	1.41022	0.158476	0.802635
ENSMUSG00000027834	Serpini1	166.376	-0.203576	0.149179	-1.36464	0.172367	0.802635
ENSMUSG00000027865	Gdap2	228.861	-0.205693	0.145409	-1.41458	0.15719	0.802635
ENSMUSG00000028062	Lamtor2	326.506	-0.172083	0.123671	-1.39146	0.164087	0.802635
ENSMUSG00000028271	Gtf2b	175.114	-0.222333	0.157907	-1.408	0.159131	0.802635
ENSMUSG00000028403	Zdhhc21	196.971	0.2266	0.163536	1.38563	0.165861	0.802635
ENSMUSG00000028745	Capzb	447.829	0.163556	0.117623	1.3905	0.164376	0.802635
ENSMUSG00000029103	Lrpap1	140.381	0.205958	0.150392	1.36948	0.17085	0.802635
ENSMUSG00000029283	Cdc7	201.531	-0.192402	0.137269	-1.40164	0.161023	0.802635
ENSMUSG00000029478	Ncor2	556.034	0.160917	0.115737	1.39037	0.164417	0.802635
ENSMUSG00000029580	Actb	6491.82	-0.115333	0.0839211	-1.3743	0.169347	0.802635
ENSMUSG00000029924	Slc37a3	238.646	0.199719	0.139985	1.42671	0.153663	0.802635
ENSMUSG00000030245	Golt1b	528.738	-0.15228	0.108123	-1.40839	0.159017	0.802635
ENSMUSG00000030306	Tmtc1	215.321	-0.184862	0.132043	-1.40002	0.161507	0.802635
ENSMUSG00000030802	Bckdk	184.655	-0.208066	0.147769	-1.40805	0.159116	0.802635
ENSMUSG00000030824	Nucb1	1137.51	-0.144172	0.100967	-1.42792	0.153315	0.802635
ENSMUSG00000030980	Knop1	314.35	-0.193248	0.136997	-1.4106	0.158364	0.802635
ENSMUSG00000031103	Elf4	126.608	-0.205868	0.14959	-1.37622	0.168755	0.802635
ENSMUSG00000031309	Rps6ka3	242.395	0.20025	0.145393	1.3773	0.16842	0.802635
ENSMUSG00000031660	Brd7	168.288	-0.220777	0.16194	-1.36333	0.172778	0.802635
ENSMUSG00000031672	Got2	598.002	-0.152071	0.110991	-1.37012	0.170648	0.802635
ENSMUSG00000031700	Gpt2	160.801	0.217261	0.155793	1.39455	0.163151	0.802635
ENSMUSG00000032086	Bace1	398.272	-0.163896	0.116214	-1.41029	0.158453	0.802635
ENSMUSG00000032252	Glce	464.417	0.181708	0.129479	1.40338	0.160504	0.802635
ENSMUSG00000032384	Csnk1g1	281.031	0.169306	0.122324	1.38409	0.166332	0.802635
ENSMUSG00000033685	Ucp2	648.306	-0.173563	0.121448	-1.42912	0.15297	0.802635
ENSMUSG00000033885	Pxk	633.828	-0.209251	0.151417	-1.38195	0.166987	0.802635
ENSMUSG00000033906	Zdhhc15	171.316	-0.220695	0.154361	-1.42973	0.152793	0.802635
ENSMUSG00000034757	Tmub2	124.684	0.216491	0.152503	1.41959	0.155728	0.802635
ENSMUSG00000035585	Tsen34	136.549	0.215875	0.156727	1.37739	0.168391	0.802635
ENSMUSG00000035898	Uba6	258.978	-0.187962	0.137483	-1.36716	0.171574	0.802635
ENSMUSG00000036636	Clcn7	227.593	0.197785	0.139036	1.42254	0.154869	0.802635
ENSMUSG00000037025	Foxa2	551.21	-0.164931	0.119155	-1.38418	0.166304	0.802635
ENSMUSG00000037106	Fer1l6	205.06	-0.226972	0.162862	-1.39365	0.163425	0.802635
ENSMUSG00000037270	4932438A13Rik	852.021	0.165666	0.121585	1.36256	0.173022	0.802635
ENSMUSG00000037573	Tob1	543.236	-0.167264	0.122235	-1.36839	0.17119	0.802635
ENSMUSG00000037613	Tnfrsf23	187.215	-0.217851	0.155946	-1.39697	0.162423	0.802635
ENSMUSG00000037887	Dusp8	502.151	-0.17841	0.126177	-1.41397	0.157372	0.802635
ENSMUSG00000038042	Ptpdc1	190.379	-0.194846	0.137391	-1.41818	0.156138	0.802635
ENSMUSG00000038374	Rbm8a	132.868	0.219296	0.159625	1.37382	0.169499	0.802635
ENSMUSG00000038459	Abhd17c	120.72	-0.208213	0.152724	-1.36333	0.172778	0.802635
ENSMUSG00000038690	Atp5j2	190.323	-0.210451	0.148662	-1.41563	0.156883	0.802635
ENSMUSG00000039007	Cpq	124.964	0.229016	0.161836	1.41511	0.157036	0.802635
ENSMUSG00000039278	Pcsk1n	609.239	0.211737	0.15057	1.40623	0.159655	0.802635
ENSMUSG00000039671	Zmynd8	487.131	-0.149087	0.109319	-1.36377	0.172639	0.802635
ENSMUSG00000039954	Stk32a	365.446	-0.190632	0.138442	-1.37698	0.168518	0.802635
ENSMUSG00000040010	Slc7a5	777.362	-0.142126	0.102979	-1.38015	0.16754	0.802635
ENSMUSG00000040118	Cacna2d1	338.901	0.169809	0.122651	1.3845	0.166207	0.802635
ENSMUSG00000040446	Rprd1a	134.06	-0.217526	0.156229	-1.39235	0.163815	0.802635
ENSMUSG00000040699	Limd2	122.669	-0.215274	0.153941	-1.39842	0.161988	0.802635
ENSMUSG00000040850	Psme4	616.377	-0.154533	0.108102	-1.42952	0.152856	0.802635
ENSMUSG00000040865	Ino80d	373.217	-0.159122	0.116393	-1.36711	0.17159	0.802635
ENSMUSG00000041084	Ostc	373.619	-0.195456	0.137164	-1.42498	0.154163	0.802635
ENSMUSG00000041355	Ssr2	1205.03	-0.145493	0.105252	-1.38232	0.166872	0.802635
ENSMUSG00000041638	Gcn1l1	470.445	0.251125	0.182663	1.3748	0.169194	0.802635
ENSMUSG00000041729	Coro2b	499.84	0.172706	0.1251	1.38054	0.167419	0.802635
ENSMUSG00000042305	Tmem183a	310.075	0.186352	0.133739	1.3934	0.163499	0.802635
ENSMUSG00000042453	Reln	146.45	-0.227549	0.164307	-1.38489	0.166085	0.802635
ENSMUSG00000042460	C1galt1	286.822	-0.186088	0.130339	-1.42772	0.153373	0.802635
ENSMUSG00000042489	Clspn	178.409	0.204713	0.144616	1.41556	0.156904	0.802635
ENSMUSG00000042535	Gtpbp1	362.12	-0.171321	0.125118	-1.36927	0.170914	0.802635
ENSMUSG00000042626	Shc1	916.009	0.136158	0.0961769	1.4157	0.156863	0.802635
ENSMUSG00000043323	Fbrsl1	513.236	0.166244	0.119155	1.39519	0.16296	0.802635
ENSMUSG00000043964	Orai3	167.32	-0.201814	0.145088	-1.39097	0.164233	0.802635
ENSMUSG00000044072	Eml6	230.143	0.187883	0.134854	1.39324	0.163549	0.802635
ENSMUSG00000044156	Hepacam2	796.453	-0.189122	0.137846	-1.37198	0.17007	0.802635
ENSMUSG00000046139	Patl1	848.76	-0.162074	0.116657	-1.38932	0.164736	0.802635
ENSMUSG00000046441	Cmtr2	137.908	-0.221341	0.154552	-1.43214	0.152103	0.802635
ENSMUSG00000046591	Ticrr	115.221	-0.226087	0.164535	-1.3741	0.169412	0.802635
ENSMUSG00000047141	Zfp654	271.794	-0.192141	0.135817	-1.4147	0.157157	0.802635
ENSMUSG00000049804	Armcx4	370.679	0.172361	0.121733	1.4159	0.156806	0.802635
ENSMUSG00000049892	Rasd1	614.911	-0.178014	0.129014	-1.3798	0.167648	0.802635
ENSMUSG00000050043	Tmx2	235.528	0.194092	0.140076	1.38562	0.165864	0.802635
ENSMUSG00000051527	Usp29	339.001	-0.166639	0.122303	-1.36251	0.173036	0.802635
ENSMUSG00000053291	Rab4b	407.294	0.165693	0.118943	1.39304	0.163607	0.802635
ENSMUSG00000055737	Ghr	662.977	-0.156942	0.113738	-1.37985	0.167632	0.802635
ENSMUSG00000057666	Gapdh	2347.08	-0.175155	0.123639	-1.41666	0.156581	0.802635
ENSMUSG00000058239	Usf2	131.817	-0.231629	0.164656	-1.40674	0.159503	0.802635
ENSMUSG00000058571	Gpc6	107.441	0.214967	0.154124	1.39476	0.163087	0.802635
ENSMUSG00000059273	Zc3h4	527.944	0.154033	0.111822	1.37748	0.168365	0.802635
ENSMUSG00000059447	Hadhb	374.905	-0.169113	0.119049	-1.42053	0.155454	0.802635
ENSMUSG00000059534	Uqcr10	132.409	-0.221968	0.15567	-1.42589	0.153899	0.802635
ENSMUSG00000059743	Fdps	260.133	0.172394	0.1265	1.36279	0.172948	0.802635
ENSMUSG00000059921	Unc5c	133.806	0.216036	0.151671	1.42437	0.154339	0.802635
ENSMUSG00000060314	Zfp941	110.72	-0.236958	0.167333	-1.41609	0.15675	0.802635
ENSMUSG00000060519	Tor3a	213.332	0.194243	0.139064	1.39679	0.162477	0.802635
ENSMUSG00000060716	Plekhh1	401.521	-0.175816	0.124116	-1.41654	0.156617	0.802635
ENSMUSG00000062270	Morf4l1	1379.01	-0.125058	0.0904764	-1.38222	0.166905	0.802635
ENSMUSG00000064210	Ano6	167.82	-0.203973	0.146121	-1.39592	0.162739	0.802635
ENSMUSG00000064363	mt-Nd4	2545.53	-0.244286	0.178421	-1.36915	0.170952	0.802635
ENSMUSG00000066043	Phactr4	355.46	-0.167143	0.119457	-1.3992	0.161754	0.802635
ENSMUSG00000066760	Psg16	120.651	0.247418	0.173285	1.42781	0.153348	0.802635
ENSMUSG00000069008	Gm5537	182.365	0.239276	0.174308	1.37272	0.16984	0.802635
ENSMUSG00000070733	Fryl	324.989	0.20473	0.147696	1.38616	0.165699	0.802635
ENSMUSG00000071064	Zfp827	201.087	-0.190753	0.138291	-1.37935	0.167786	0.802635
ENSMUSG00000071708	Sms	116.565	-0.217466	0.157054	-1.38466	0.166158	0.802635
ENSMUSG00000074221	Zfp568	2161.67	-0.129289	0.0903588	-1.43084	0.152475	0.802635
ENSMUSG00000079111	Kdelr2	8890.16	-0.141544	0.100506	-1.40832	0.159038	0.802635
ENSMUSG00000094483	Purb	567.602	-0.16106	0.113826	-1.41497	0.157078	0.802635
ENSMUSG00000094500	Smim18	146.421	-0.232709	0.167837	-1.38651	0.16559	0.802635
ENSMUSG00000104463	Mat2a	1150.53	-0.128206	0.0938689	-1.3658	0.172003	0.802635
ENSMUSG00000002017	Fam98a	236.557	-0.191183	0.140525	-1.36048	0.173677	0.804785
ENSMUSG00000005233	Spc25	473.542	-0.149055	0.109755	-1.35807	0.174441	0.804785
ENSMUSG00000007415	Gatad1	106.512	-0.230179	0.169476	-1.35819	0.174404	0.804785
ENSMUSG00000014077	Chp1	351.021	-0.170266	0.12573	-1.35422	0.175668	0.804785
ENSMUSG00000017716	Birc5	738.685	-0.140471	0.103761	-1.3538	0.175801	0.804785
ENSMUSG00000022680	Pdxdc1	208.192	0.197495	0.145842	1.35418	0.17568	0.804785
ENSMUSG00000024019	Cmtr1	238.597	0.203086	0.149844	1.35532	0.175315	0.804785
ENSMUSG00000025156	Gps1	457.349	-0.162485	0.120012	-1.3539	0.175768	0.804785
ENSMUSG00000029145	Eif2b4	186.805	0.208854	0.154192	1.3545	0.175577	0.804785
ENSMUSG00000035614	Togaram1	267.774	-0.187287	0.13809	-1.35627	0.175012	0.804785
ENSMUSG00000036733	Rbm42	170.987	-0.193889	0.143142	-1.35452	0.175571	0.804785
ENSMUSG00000037400	Atp11b	192.603	0.203253	0.14979	1.35692	0.174806	0.804785
ENSMUSG00000038372	Gmds	134.697	0.207107	0.152468	1.35836	0.17435	0.804785
ENSMUSG00000044308	Ubr3	608.966	0.176557	0.130004	1.35808	0.174437	0.804785
ENSMUSG00000053907	Mat2a	1149.98	-0.126813	0.0936821	-1.35365	0.175848	0.804785
ENSMUSG00000064354	mt-Co2	1082.22	-0.243977	0.18002	-1.35528	0.175328	0.804785
ENSMUSG00000096255	Dynlt1b	261.856	-0.230328	0.169881	-1.35582	0.175156	0.804785
ENSMUSG00000027737	Slc7a11	105.092	0.24605	0.181828	1.3532	0.175991	0.804806
ENSMUSG00000001525	Tubb5	3360.99	-0.137926	0.101999	-1.35223	0.176303	0.805113
ENSMUSG00000031754	Nudt21	288.312	-0.186406	0.137906	-1.3517	0.176473	0.805113
ENSMUSG00000042599	Kdm7a	175.026	0.20194	0.149354	1.35209	0.176346	0.805113
ENSMUSG00000022272	Myo10	335.869	0.205322	0.152413	1.34714	0.177934	0.806322
ENSMUSG00000025271	Pfkfb1	210.114	-0.208408	0.154721	-1.34699	0.177983	0.806322
ENSMUSG00000025613	Cct8	426.905	0.176845	0.131264	1.34725	0.1779	0.806322
ENSMUSG00000029202	Pds5a	331.024	0.164777	0.122065	1.34992	0.177041	0.806322
ENSMUSG00000031065	Cdk16	743.779	-0.130966	0.097032	-1.34972	0.177106	0.806322
ENSMUSG00000033769	Exoc6b	422.953	-0.149108	0.110534	-1.34897	0.177347	0.806322
ENSMUSG00000037070	Rbmxl1	125.835	-0.213526	0.158363	-1.34834	0.17755	0.806322
ENSMUSG00000042942	Greb1l	297.159	-0.19853	0.147379	-1.34707	0.177957	0.806322
ENSMUSG00000066724	Gm10175	331.564	-0.222592	0.164975	-1.34925	0.177258	0.806322
ENSMUSG00000039914	Coq10a	153.787	0.193266	0.143558	1.34626	0.178218	0.806758
ENSMUSG00000035093	Secisbp2l	258.029	0.167064	0.124221	1.34489	0.17866	0.806879
ENSMUSG00000038024	Dennd4c	759.618	-0.190845	0.141881	-1.34511	0.17859	0.806879
ENSMUSG00000044461	Shisa2	115.487	-0.221617	0.164748	-1.34519	0.178563	0.806879
ENSMUSG00000039701	Usp53	130.601	0.230028	0.171198	1.34364	0.179065	0.80808
ENSMUSG00000036501	Fam13b	218.433	-0.184075	0.13715	-1.34214	0.179549	0.809638
ENSMUSG00000002129	Sf3a1	307.656	-0.18364	0.137246	-1.33804	0.180885	0.810158
ENSMUSG00000004947	Dtx2	500.136	0.14234	0.106511	1.33639	0.181421	0.810158
ENSMUSG00000020802	Ube2o	490.221	0.14078	0.105275	1.33727	0.181135	0.810158
ENSMUSG00000020893	Per1	329.075	-0.177363	0.13235	-1.3401	0.180213	0.810158
ENSMUSG00000020899	Pfas	245.55	0.226517	0.169603	1.33558	0.181687	0.810158
ENSMUSG00000026204	Ptprn	2305.73	0.106904	0.0800414	1.33561	0.181676	0.810158
ENSMUSG00000026436	Elk4	152.959	-0.19316	0.14463	-1.33554	0.181699	0.810158
ENSMUSG00000028234	Rps20	168.533	-0.218827	0.163955	-1.33468	0.181982	0.810158
ENSMUSG00000028454	Pigo	151.089	-0.221905	0.166279	-1.33454	0.182028	0.810158
ENSMUSG00000029203	Ube2k	243.216	-0.201172	0.150699	-1.33493	0.1819	0.810158
ENSMUSG00000030678	Maz	1252.8	-0.116443	0.0869704	-1.33888	0.180611	0.810158
ENSMUSG00000030816	Rnf40	198.497	0.184005	0.137821	1.3351	0.181845	0.810158
ENSMUSG00000031502	Col4a1	121.259	0.236889	0.177449	1.33497	0.181887	0.810158
ENSMUSG00000036902	Neto2	230.409	-0.189848	0.141799	-1.33885	0.18062	0.810158
ENSMUSG00000039347	Atp6v0e2	244.499	-0.1772	0.132443	-1.33793	0.180918	0.810158
ENSMUSG00000049643	2310022A10Rik	215.754	-0.181108	0.135345	-1.33812	0.180858	0.810158
ENSMUSG00000072889	Nfxl1	283.222	0.166326	0.124197	1.33921	0.180503	0.810158
ENSMUSG00000031808	Slc27a1	123.238	0.214686	0.161066	1.33291	0.182563	0.810751
ENSMUSG00000039428	Tmem135	154.064	0.206957	0.155273	1.33286	0.182579	0.810751
ENSMUSG00000051413	Plagl2	677.816	-0.180292	0.135238	-1.33315	0.182484	0.810751
ENSMUSG00000044627	Swi5	125.55	-0.206645	0.155101	-1.33232	0.182755	0.810913
ENSMUSG00000017760	Ctsa	1706.17	-0.147717	0.111013	-1.33062	0.183313	0.811562
ENSMUSG00000032097	Ddx6	1400.62	-0.141084	0.10603	-1.33061	0.183319	0.811562
ENSMUSG00000063317	Usp31	674.778	-0.166727	0.125236	-1.33131	0.183089	0.811562
ENSMUSG00000034413	Neurl1b	782.068	0.141207	0.10624	1.32914	0.183803	0.812559
ENSMUSG00000068036	Afdn	511.68	0.149383	0.112396	1.32908	0.183823	0.812559
ENSMUSG00000021277	Traf3	129.632	-0.201311	0.151562	-1.32824	0.184098	0.813156
ENSMUSG00000022708	Zbtb20	337.345	-0.16954	0.127719	-1.32745	0.184361	0.813329
ENSMUSG00000024661	Fth1	287.753	-0.188218	0.141847	-1.3269	0.18454	0.813329
ENSMUSG00000031328	Flna	618.475	0.141395	0.106563	1.32686	0.184556	0.813329
ENSMUSG00000038650	Rnh1	308.481	0.170729	0.128837	1.32516	0.185119	0.814579
ENSMUSG00000069769	Msi2	247.233	-0.17888	0.134963	-1.3254	0.18504	0.814579
ENSMUSG00000018363	Smurf2	185.806	-0.179608	0.135624	-1.32431	0.185401	0.814613
ENSMUSG00000022314	Rad21	502.603	-0.16547	0.12499	-1.32387	0.185546	0.814613
ENSMUSG00000030057	Cnbp	236.158	-0.173472	0.131026	-1.32395	0.185518	0.814613
ENSMUSG00000028909	Ptpru	403.251	-0.164442	0.12432	-1.32273	0.185924	0.815656
ENSMUSG00000024844	Banf1	338.236	-0.163783	0.123874	-1.32217	0.18611	0.815861
ENSMUSG00000018362	Kpna2	3249.8	-0.146048	0.110516	-1.32152	0.18633	0.816208
ENSMUSG00000018677	Slc25a39	293.781	0.182833	0.138629	1.31887	0.187214	0.816889
ENSMUSG00000022604	Cep97	124.487	-0.223877	0.169742	-1.31892	0.187195	0.816889
ENSMUSG00000032478	Nme6	128.437	-0.215162	0.162999	-1.32002	0.186828	0.816889
ENSMUSG00000033940	Brk1	225.167	-0.179694	0.13621	-1.31924	0.18709	0.816889
ENSMUSG00000059811	Atl2	181.668	0.194066	0.146966	1.32048	0.186676	0.816889
ENSMUSG00000059851	Kmt5c	477.312	0.148408	0.112556	1.31853	0.187326	0.816889
ENSMUSG00000069601	Ank3	351.397	0.168639	0.128006	1.31743	0.187695	0.817884
ENSMUSG00000021368	Tbc1d7	191.486	-0.189458	0.143909	-1.31652	0.188001	0.817994
ENSMUSG00000029227	Fip1l1	137.509	0.198957	0.151086	1.31684	0.187891	0.817994
ENSMUSG00000030061	Uba3	128.658	-0.197185	0.149899	-1.31545	0.188358	0.81838
ENSMUSG00000078578	Ube2d3	389.716	-0.20368	0.154841	-1.31541	0.188371	0.81838
ENSMUSG00000025019	Lcor	374.079	-0.185581	0.141129	-1.31498	0.188516	0.818402
ENSMUSG00000013833	Med16	111.976	0.217664	0.166125	1.31024	0.190116	0.819156
ENSMUSG00000024556	Me2	158.843	-0.199424	0.152263	-1.30973	0.190287	0.819156
ENSMUSG00000025738	Fbxl16	552.001	-0.149072	0.113513	-1.31325	0.189098	0.819156
ENSMUSG00000031709	Tbc1d9	849.775	-0.130703	0.0997341	-1.31052	0.190021	0.819156
ENSMUSG00000032383	Ppib	1223.8	-0.175209	0.133532	-1.31211	0.189482	0.819156
ENSMUSG00000035540	Gc	284.892	-0.173504	0.132499	-1.30947	0.190374	0.819156
ENSMUSG00000037071	Scd1	451.902	0.169	0.128814	1.31197	0.189531	0.819156
ENSMUSG00000041607	Mbp	256.039	0.165632	0.126153	1.31295	0.189201	0.819156
ENSMUSG00000048154	Kmt2d	1086.3	0.154499	0.118023	1.30906	0.190515	0.819156
ENSMUSG00000049299	Trappc1	2101.76	-0.143843	0.109713	-1.31108	0.18983	0.819156
ENSMUSG00000056537	Rlim	330.941	-0.16124	0.123174	-1.30905	0.190518	0.819156
ENSMUSG00000074748	Atxn7l3b	811.012	-0.134901	0.103048	-1.30911	0.190496	0.819156
ENSMUSG00000076431	Sox4	287.048	-0.156715	0.11947	-1.31175	0.189605	0.819156
ENSMUSG00000026657	Frmd4a	308.825	-0.171305	0.130986	-1.30781	0.190938	0.819468
ENSMUSG00000031365	Zfp275	583.127	-0.179205	0.137018	-1.3079	0.190907	0.819468
ENSMUSG00000048108	Tmem72	764.523	0.234623	0.179432	1.30759	0.191012	0.819468
ENSMUSG00000051220	Ercc6l	116.903	-0.199051	0.152291	-1.30704	0.191197	0.819659
ENSMUSG00000040225	Prrc2c	1074.41	-0.18494	0.141656	-1.30555	0.191704	0.820669
ENSMUSG00000094777	Hist1h2ap	136.932	-0.200985	0.15395	-1.30552	0.191715	0.820669
ENSMUSG00000022464	Slc38a4	8492.92	-0.224119	0.171744	-1.30496	0.191906	0.820886
ENSMUSG00000000305	Cdh4	708.741	0.190994	0.146413	1.30448	0.192069	0.820977
ENSMUSG00000018068	Ints2	200.75	0.19287	0.147958	1.30355	0.192388	0.82174
ENSMUSG00000018209	Stk4	110.342	0.210142	0.161342	1.30247	0.192757	0.822062
ENSMUSG00000029465	Arpc3	152.156	-0.207774	0.159729	-1.30079	0.193329	0.822062
ENSMUSG00000029684	Wasl	215.794	0.195768	0.150446	1.30125	0.193173	0.822062
ENSMUSG00000033478	Fam160b1	288.564	-0.160219	0.123168	-1.30081	0.193323	0.822062
ENSMUSG00000034892	Rps29	337.916	-0.171718	0.13185	-1.30238	0.192787	0.822062
ENSMUSG00000036309	Skp1a	377.261	-0.170712	0.131167	-1.30149	0.193092	0.822062
ENSMUSG00000037795	N4bp2	186.021	-0.18207	0.140007	-1.30044	0.193451	0.822062
ENSMUSG00000002871	Tpra1	164.285	-0.182219	0.140465	-1.29726	0.194542	0.822631
ENSMUSG00000006333	Rps9	295.774	0.18516	0.142662	1.2979	0.194323	0.822631
ENSMUSG00000015568	Lpl	233.82	0.219204	0.168961	1.29736	0.194507	0.822631
ENSMUSG00000036591	Arhgap21	320.048	0.166736	0.128539	1.29717	0.194573	0.822631
ENSMUSG00000037236	Matr3	463.666	-0.154784	0.119205	-1.29846	0.194129	0.822631
ENSMUSG00000053617	Sh3pxd2a	1512.97	-0.120374	0.0927603	-1.29769	0.194394	0.822631
ENSMUSG00000092486	2610524H06Rik	604.667	0.13316	0.102546	1.29854	0.194103	0.822631
ENSMUSG00000004788	Eif2b2	131.52	0.200181	0.154584	1.29496	0.195333	0.823451
ENSMUSG00000014837	4931428F04Rik	375.41	0.165408	0.127811	1.29416	0.195609	0.823451
ENSMUSG00000028960	Ube4b	957.741	0.183482	0.141785	1.29408	0.195637	0.823451
ENSMUSG00000033014	Trim33	203.936	-0.198418	0.153405	-1.29342	0.195865	0.823451
ENSMUSG00000040631	Dok4	146.956	-0.190073	0.146965	-1.29333	0.195898	0.823451
ENSMUSG00000047749	Zc3hav1l	624.589	-0.149302	0.115273	-1.29521	0.195249	0.823451
ENSMUSG00000048779	P2ry6	132.145	0.198526	0.153437	1.29386	0.195714	0.823451
ENSMUSG00000061654	Spry3	111.062	-0.210859	0.163007	-1.29356	0.195818	0.823451
ENSMUSG00000000915	Hip1r	347.447	0.182706	0.142417	1.2829	0.199528	0.823821
ENSMUSG00000001157	Gmcl1	117.633	0.204327	0.158809	1.28662	0.198228	0.823821
ENSMUSG00000001910	Nacc1	527.289	-0.153378	0.118843	-1.29059	0.196845	0.823821
ENSMUSG00000003873	Bax	132.173	0.199976	0.155864	1.28302	0.199487	0.823821
ENSMUSG00000010609	Psen2	387.727	0.163851	0.127352	1.2866	0.198234	0.823821
ENSMUSG00000019726	Lyst	417.8	0.162231	0.126515	1.28231	0.199735	0.823821
ENSMUSG00000020300	Cpeb4	627.347	-0.158031	0.123258	-1.28211	0.199804	0.823821
ENSMUSG00000021115	Vrk1	189.458	-0.189603	0.147266	-1.28748	0.197927	0.823821
ENSMUSG00000025290	Rps24	218.807	-0.192983	0.150492	-1.28235	0.199721	0.823821
ENSMUSG00000025823	Pdia4	297.691	-0.163502	0.127079	-1.28662	0.198227	0.823821
ENSMUSG00000026750	Psmb7	214.692	-0.173945	0.135133	-1.28721	0.19802	0.823821
ENSMUSG00000026779	Mastl	167.225	-0.203775	0.158394	-1.2865	0.198268	0.823821
ENSMUSG00000027674	Pex5l	409.528	0.144572	0.112215	1.28834	0.197627	0.823821
ENSMUSG00000028126	Pip5k1a	107.531	0.207134	0.160266	1.29244	0.196204	0.823821
ENSMUSG00000028277	Ube2j1	259.416	-0.202842	0.157859	-1.28496	0.198808	0.823821
ENSMUSG00000028385	Snx30	546.896	0.173909	0.135414	1.28428	0.199045	0.823821
ENSMUSG00000028397	Kdm4c	126.087	-0.192787	0.149514	-1.28943	0.19725	0.823821
ENSMUSG00000028703	Lrrc41	642.811	-0.143721	0.111256	-1.29181	0.196424	0.823821
ENSMUSG00000028893	Sesn2	295.897	-0.177613	0.138436	-1.283	0.199493	0.823821
ENSMUSG00000030720	Cln3	425.393	-0.168935	0.131748	-1.28225	0.199754	0.823821
ENSMUSG00000033904	Ccp110	259.667	-0.187745	0.146325	-1.28307	0.199468	0.823821
ENSMUSG00000040605	Bace2	4321.82	-0.123613	0.0959939	-1.28772	0.197842	0.823821
ENSMUSG00000042473	Tbc1d8b	228.082	-0.171048	0.133293	-1.28325	0.199405	0.823821
ENSMUSG00000045912	C2cd4c	104.467	0.205747	0.159921	1.28656	0.198249	0.823821
ENSMUSG00000048833	Slc39a9	287.312	0.154902	0.120139	1.28935	0.197276	0.823821
ENSMUSG00000050565	Tor1aip2	449.23	-0.158085	0.122385	-1.2917	0.19646	0.823821
ENSMUSG00000070544	Top1	211.365	-0.192478	0.14964	-1.28627	0.198348	0.823821
ENSMUSG00000000001	Gnai3	592.372	-0.140267	0.109501	-1.28096	0.200207	0.82459
ENSMUSG00000001729	Akt1	352.994	0.148352	0.116262	1.27602	0.201949	0.82459
ENSMUSG00000002068	Ccne1	756.818	-0.139306	0.110328	-1.26265	0.206716	0.82459
ENSMUSG00000003458	Ncstn	601.331	-0.13495	0.106415	-1.26815	0.204745	0.82459
ENSMUSG00000004099	Dnmt1	814.251	0.129749	0.102286	1.2685	0.204619	0.82459
ENSMUSG00000004849	Ap1s1	408.846	0.141065	0.110417	1.27757	0.2014	0.82459
ENSMUSG00000014956	Ppp1cb	480.655	0.156646	0.123927	1.26402	0.206223	0.82459
ENSMUSG00000015714	Cers2	352.044	-0.15019	0.118765	-1.26459	0.206017	0.82459
ENSMUSG00000017664	Slc35c2	380.29	-0.147351	0.116699	-1.26266	0.206712	0.82459
ENSMUSG00000019715	Gle1	120.298	0.203156	0.159898	1.27054	0.203893	0.82459
ENSMUSG00000019961	Tmpo	520.163	-0.163146	0.127584	-1.27873	0.200992	0.82459
ENSMUSG00000020212	Mdm1	111.015	0.206445	0.161578	1.27768	0.201362	0.82459
ENSMUSG00000020900	Myh10	223.063	-0.173271	0.136417	-1.27015	0.20403	0.82459
ENSMUSG00000021917	Spcs1	159.077	-0.185126	0.146054	-1.26752	0.20497	0.82459
ENSMUSG00000022295	Atp6v1c1	223.918	-0.175584	0.138105	-1.27138	0.203595	0.82459
ENSMUSG00000022389	Tef	265.614	0.204149	0.16013	1.27489	0.202347	0.82459
ENSMUSG00000022673	Mcm4	320.94	-0.158891	0.124216	-1.27915	0.200844	0.82459
ENSMUSG00000023960	Enpp5	869.17	-0.178647	0.139996	-1.27608	0.201927	0.82459
ENSMUSG00000024454	Hdac3	265.087	-0.177701	0.140539	-1.26442	0.206078	0.82459
ENSMUSG00000025237	Parp6	447.037	-0.155124	0.122556	-1.26573	0.205608	0.82459
ENSMUSG00000025240	Sacm1l	249.323	0.16014	0.126413	1.2668	0.205226	0.82459
ENSMUSG00000026705	Klhl20	168.613	0.183183	0.145003	1.26331	0.206479	0.82459
ENSMUSG00000026927	Sdccag3	103.217	-0.209429	0.163864	-1.27807	0.201226	0.82459
ENSMUSG00000027346	Gpcpd1	176.916	-0.200939	0.157646	-1.27462	0.202444	0.82459
ENSMUSG00000028161	Ppp3ca	141.305	0.205718	0.161301	1.27537	0.202178	0.82459
ENSMUSG00000028248	Pnisr	185.95	-0.186463	0.147437	-1.2647	0.20598	0.82459
ENSMUSG00000028391	Wdr31	104.16	0.230187	0.180591	1.27463	0.20244	0.82459
ENSMUSG00000028555	Ttc39a	331.729	0.158145	0.124665	1.26856	0.204598	0.82459
ENSMUSG00000028991	Mtor	138.817	0.202133	0.15919	1.26977	0.204168	0.82459
ENSMUSG00000030655	Smg1	404.167	0.163983	0.128993	1.27125	0.203639	0.82459
ENSMUSG00000030697	Ppp4c	211.532	-0.171636	0.134316	-1.27785	0.201301	0.82459
ENSMUSG00000035299	Mid1	266.164	0.22701	0.177254	1.2807	0.200299	0.82459
ENSMUSG00000036676	Tmtc3	222.404	0.193483	0.152094	1.27213	0.203327	0.82459
ENSMUSG00000036948	BC037034	326.291	-0.154826	0.122639	-1.26246	0.206785	0.82459
ENSMUSG00000036980	Taf6	311.578	-0.154462	0.121642	-1.26981	0.204154	0.82459
ENSMUSG00000038546	Ranbp9	208.918	-0.196662	0.154473	-1.27312	0.202975	0.82459
ENSMUSG00000039068	Zzz3	188.459	-0.17804	0.13969	-1.27454	0.202471	0.82459
ENSMUSG00000041415	Dicer1	1702.38	-0.139356	0.110165	-1.26497	0.205882	0.82459
ENSMUSG00000043668	Tox3	347.517	-0.194779	0.15294	-1.27357	0.202816	0.82459
ENSMUSG00000044134	Pheta1	141.74	0.19126	0.149927	1.27569	0.202066	0.82459
ENSMUSG00000045098	Kmt5b	274.07	0.180606	0.142811	1.26465	0.205997	0.82459
ENSMUSG00000046062	Ppp1r15b	901.134	-0.134596	0.105857	-1.27149	0.203553	0.82459
ENSMUSG00000047003	Zfp41	189.89	0.17621	0.138276	1.27433	0.202546	0.82459
ENSMUSG00000051375	Pcdh1	157.138	0.178902	0.141116	1.26776	0.204883	0.82459
ENSMUSG00000052917	Senp7	134.527	0.224139	0.175898	1.27425	0.202574	0.82459
ENSMUSG00000058258	Idi1	287.167	0.181999	0.143455	1.26868	0.204555	0.82459
ENSMUSG00000077450	Rab11b	288.774	-0.164462	0.129964	-1.26544	0.205713	0.82459
ENSMUSG00000091537	Tma7	674.414	-0.160005	0.125899	-1.2709	0.203764	0.82459
ENSMUSG00000028656	Cap1	256.465	-0.170882	0.135541	-1.26074	0.207404	0.826495
ENSMUSG00000000215	Ins2	42834.9	-0.122625	0.0977224	-1.25483	0.209542	0.826941
ENSMUSG00000001844	Zdhhc4	193.32	-0.181844	0.145018	-1.25394	0.209863	0.826941
ENSMUSG00000005687	Bcas2	117.265	0.195494	0.155871	1.2542	0.209768	0.826941
ENSMUSG00000021484	Lman2	2002.37	0.119879	0.0954899	1.25541	0.20933	0.826941
ENSMUSG00000021916	Glt8d1	175.272	0.20074	0.160068	1.25409	0.209808	0.826941
ENSMUSG00000024073	Birc6	1523.82	0.114055	0.0905964	1.25894	0.208053	0.826941
ENSMUSG00000024491	Rbm27	237.271	-0.176235	0.140255	-1.25653	0.208923	0.826941
ENSMUSG00000028926	Cdk14	165.549	0.222086	0.176255	1.26003	0.20766	0.826941
ENSMUSG00000029687	Ezh2	585.282	-0.141126	0.112562	-1.25376	0.209929	0.826941
ENSMUSG00000031703	Itfg1	570.248	-0.170208	0.135159	-1.25932	0.207915	0.826941
ENSMUSG00000034254	Agpat1	195.996	-0.182803	0.145781	-1.25396	0.209857	0.826941
ENSMUSG00000037622	Wdtc1	148.477	-0.194655	0.154738	-1.25797	0.208402	0.826941
ENSMUSG00000042377	Fam83g	504.868	0.131141	0.104381	1.25637	0.208982	0.826941
ENSMUSG00000042572	Ube2q1	280.794	0.162451	0.12941	1.25532	0.209363	0.826941
ENSMUSG00000051403	Ppp1r37	145.312	0.184723	0.14732	1.25389	0.209881	0.826941
ENSMUSG00000063894	Zkscan8	111.854	-0.207005	0.165073	-1.25402	0.209835	0.826941
ENSMUSG00000073640	Rpl27-ps3	286.805	-0.205292	0.163178	-1.25808	0.208361	0.826941
ENSMUSG00000009207	Lnpk	121.214	-0.200096	0.159686	-1.25306	0.210185	0.827067
ENSMUSG00000028394	Pole3	229.596	-0.169271	0.135146	-1.2525	0.210387	0.827067
ENSMUSG00000030098	Grip2	1280.04	0.224526	0.179228	1.25274	0.2103	0.827067
ENSMUSG00000021831	Ero1l	472.063	-0.171661	0.137154	-1.25159	0.210719	0.827667
ENSMUSG00000028879	Stx12	103.55	-0.203783	0.162856	-1.2513	0.210824	0.827667
ENSMUSG00000025790	Slco3a1	176.872	0.188671	0.150836	1.25083	0.210995	0.827783
ENSMUSG00000030533	Unc45a	263.636	0.174806	0.139929	1.24925	0.211574	0.828936
ENSMUSG00000091512	Lamtor3	235.622	-0.179974	0.14403	-1.24956	0.211461	0.828936
ENSMUSG00000031987	Egln1	152.326	0.181115	0.145107	1.24815	0.211977	0.829707
ENSMUSG00000038116	Phf20	297.304	0.177834	0.142503	1.24793	0.212055	0.829707
ENSMUSG00000028521	Slc35d1	161.604	-0.196002	0.15721	-1.24675	0.212489	0.829733
ENSMUSG00000034593	Myo5a	897.16	-0.135097	0.108342	-1.24695	0.212415	0.829733
ENSMUSG00000048327	Ckap2l	162.395	-0.204577	0.164075	-1.24685	0.212451	0.829733
ENSMUSG00000021759	Plpp1	141.126	-0.192832	0.154979	-1.24425	0.213407	0.830894
ENSMUSG00000028700	Pomgnt1	138.096	0.187367	0.150467	1.24524	0.213045	0.830894
ENSMUSG00000033712	Ccar2	170.522	0.17184	0.138031	1.24494	0.213153	0.830894
ENSMUSG00000038256	Bcl9	392.31	-0.14304	0.114951	-1.24435	0.21337	0.830894
ENSMUSG00000098301	Srsf1	194.138	0.179386	0.144201	1.244	0.213499	0.830894
ENSMUSG00000002297	Dbf4	121.715	-0.18993	0.152894	-1.24223	0.214151	0.832507
ENSMUSG00000024989	Cep55	183.029	-0.173949	0.140044	-1.2421	0.2142	0.832507
ENSMUSG00000021133	Susd6	1101.17	-0.13451	0.108426	-1.24057	0.214765	0.833593
ENSMUSG00000029390	Tmed2	455.917	-0.175452	0.14139	-1.24091	0.214639	0.833593
ENSMUSG00000019872	Smpdl3a	240.608	-0.201371	0.162486	-1.23931	0.21523	0.834243
ENSMUSG00000028211	Trp53inp1	212.878	-0.177804	0.143448	-1.2395	0.215159	0.834243
ENSMUSG00000069237	Fam8a1	398.576	-0.156128	0.126016	-1.23895	0.215362	0.834243
ENSMUSG00000028803	Nipal3	312.506	0.153371	0.123846	1.2384	0.215568	0.834486
ENSMUSG00000051329	Nup160	279.241	-0.159843	0.129157	-1.23758	0.215871	0.835102
ENSMUSG00000020078	Vps26a	175.031	-0.192229	0.156054	-1.23181	0.218019	0.836199
ENSMUSG00000020413	Hus1	110.771	-0.20055	0.162305	-1.23563	0.216595	0.836199
ENSMUSG00000024370	Cdc23	435.354	-0.15641	0.126922	-1.23234	0.217824	0.836199
ENSMUSG00000024474	Ik	175.735	0.187338	0.151943	1.23295	0.217593	0.836199
ENSMUSG00000026031	Cflar	234.244	0.180532	0.146558	1.23181	0.21802	0.836199
ENSMUSG00000027170	Eif3m	209.855	-0.165633	0.134459	-1.23185	0.218007	0.836199
ENSMUSG00000027508	Pag1	579.852	-0.157501	0.127731	-1.23306	0.217552	0.836199
ENSMUSG00000028484	Psip1	249.871	-0.185473	0.150118	-1.23552	0.216638	0.836199
ENSMUSG00000031485	Plpbp	209.761	-0.182726	0.147803	-1.23628	0.216355	0.836199
ENSMUSG00000034647	Ankrd12	257.7	0.17531	0.142139	1.23337	0.217438	0.836199
ENSMUSG00000038633	Degs1	365.353	-0.171397	0.138873	-1.2342	0.217128	0.836199
ENSMUSG00000062397	Zfp706	279.004	-0.160101	0.129921	-1.2323	0.217837	0.836199
ENSMUSG00000106722	Sf1	225.112	-0.165488	0.134062	-1.23441	0.217049	0.836199
ENSMUSG00000022360	Atad2	469.761	-0.163779	0.133003	-1.2314	0.218175	0.836242
ENSMUSG00000003039	Fam32a	222.139	-0.169265	0.138429	-1.22276	0.221421	0.837103
ENSMUSG00000003154	Foxj2	107.671	-0.191705	0.156059	-1.22842	0.21929	0.837103
ENSMUSG00000009291	Pttg1ip	479.808	0.17247	0.140319	1.22913	0.219025	0.837103
ENSMUSG00000010608	Rbm25	206.337	0.175441	0.142808	1.22851	0.219256	0.837103
ENSMUSG00000018379	Srsf1	194.423	0.176945	0.14418	1.22725	0.219729	0.837103
ENSMUSG00000021217	Tshz3	214.76	-0.181949	0.148174	-1.22794	0.219469	0.837103
ENSMUSG00000022312	Eif3h	181.604	-0.186166	0.15207	-1.22422	0.220869	0.837103
ENSMUSG00000022867	Usp25	162.048	-0.180461	0.147676	-1.22201	0.221705	0.837103
ENSMUSG00000024867	Pip5k1b	321.811	-0.159966	0.130881	-1.22223	0.221622	0.837103
ENSMUSG00000025867	Cplx2	269.402	-0.151049	0.123646	-1.22163	0.221848	0.837103
ENSMUSG00000027699	Ect2	247.827	-0.16621	0.135859	-1.2234	0.221177	0.837103
ENSMUSG00000029472	Anapc5	821.503	-0.117143	0.095466	-1.22707	0.219797	0.837103
ENSMUSG00000032014	Oaf	119.846	0.203779	0.166587	1.22325	0.221234	0.837103
ENSMUSG00000033809	Alg3	479.966	-0.182794	0.14949	-1.22279	0.221411	0.837103
ENSMUSG00000036093	Arl5a	547.276	-0.135821	0.110998	-1.22364	0.221088	0.837103
ENSMUSG00000036932	Aifm1	358.476	0.149222	0.121845	1.22469	0.220693	0.837103
ENSMUSG00000038418	Egr1	201.171	0.209738	0.17116	1.22539	0.220429	0.837103
ENSMUSG00000041498	Kif14	138.087	-0.197774	0.16159	-1.22393	0.220979	0.837103
ENSMUSG00000047866	Lonp2	124.825	-0.19012	0.155427	-1.22321	0.221249	0.837103
ENSMUSG00000048109	Rbm15	155.287	-0.178514	0.145086	-1.2304	0.218548	0.837103
ENSMUSG00000048118	Arid4a	109.268	-0.192539	0.157551	-1.22207	0.22168	0.837103
ENSMUSG00000053253	Ndfip2	264.726	-0.173114	0.140873	-1.22886	0.219123	0.837103
ENSMUSG00000063802	Hspbp1	114.796	0.204567	0.166613	1.2278	0.219524	0.837103
ENSMUSG00000064225	Paqr9	145.288	-0.182548	0.149101	-1.22433	0.220829	0.837103
ENSMUSG00000035107	Dcbld2	552.143	0.174561	0.142953	1.22111	0.222043	0.837297
ENSMUSG00000043467	Zbtb37	153.576	0.210451	0.172402	1.2207	0.222201	0.83735
ENSMUSG00000000600	Krit1	167.51	0.218254	0.17893	1.21978	0.22255	0.838124
ENSMUSG00000001911	Nfix	273.066	-0.156069	0.128419	-1.21531	0.224248	0.838691
ENSMUSG00000005575	Ube2m	628.613	-0.129282	0.106318	-1.216	0.223985	0.838691
ENSMUSG00000020166	Cnot2	123.099	-0.202796	0.166871	-1.21529	0.224257	0.838691
ENSMUSG00000020330	Hmmr	214.089	-0.162425	0.133362	-1.21793	0.22325	0.838691
ENSMUSG00000024261	Syt4	629.415	-0.148295	0.121973	-1.2158	0.22406	0.838691
ENSMUSG00000028252	Ccnc	134.07	-0.18674	0.15331	-1.21805	0.223204	0.838691
ENSMUSG00000028412	Slc44a1	350.46	0.151615	0.124644	1.21638	0.22384	0.838691
ENSMUSG00000031446	Cul4a	206.888	0.194012	0.15969	1.21493	0.224394	0.838691
ENSMUSG00000032898	Fbxo21	474.731	0.127975	0.105217	1.2163	0.223871	0.838691
ENSMUSG00000042502	Cd2bp2	105.284	-0.195179	0.160663	-1.21484	0.224428	0.838691
ENSMUSG00000062110	Scfd2	149.675	0.212816	0.175104	1.21537	0.224224	0.838691
ENSMUSG00000068749	Psma5	506.991	-0.140076	0.115059	-1.21743	0.223442	0.838691
ENSMUSG00000040761	Spen	625.511	0.141227	0.116367	1.21364	0.224886	0.839864
ENSMUSG00000040022	Rab11fip2	109.11	-0.199115	0.164137	-1.2131	0.225092	0.840093
ENSMUSG00000016624	Phf21b	391.935	0.14961	0.123579	1.21064	0.226032	0.840881
ENSMUSG00000027332	Ivd	333.766	0.156207	0.12888	1.21204	0.225499	0.840881
ENSMUSG00000038717	Atp5l	411.212	-0.144022	0.118896	-1.21132	0.225772	0.840881
ENSMUSG00000041859	Mcm3	314.834	0.143859	0.1189	1.20991	0.226313	0.840881
ENSMUSG00000046711	Hmga1	111.773	-0.199261	0.164594	-1.21062	0.22604	0.840881
ENSMUSG00000073176	Zfp449	160.464	-0.192764	0.15929	-1.21014	0.226224	0.840881
ENSMUSG00000073563	Csnk1g3	135.218	-0.182107	0.150495	-1.21005	0.22626	0.840881
ENSMUSG00000020246	Hcfc2	415.554	-0.153906	0.127412	-1.20794	0.227071	0.843158
ENSMUSG00000074994	Qser1	206.357	-0.198935	0.164843	-1.20682	0.227503	0.844223
ENSMUSG00000024594	Prrc1	317.863	0.147184	0.122067	1.20577	0.227908	0.844652
ENSMUSG00000047459	Dynlrb1	109.258	-0.203508	0.168745	-1.20601	0.227814	0.844652
ENSMUSG00000032293	Ireb2	781.771	-0.145396	0.120697	-1.20464	0.228343	0.845219
ENSMUSG00000037278	Tmem97	193.803	-0.184729	0.153351	-1.20462	0.228351	0.845219
ENSMUSG00000004071	Cdip1	140.921	0.186561	0.154983	1.20376	0.228684	0.845913
ENSMUSG00000020782	Llgl2	109.782	-0.191196	0.159053	-1.20209	0.22933	0.846046
ENSMUSG00000022280	Rnf19a	285.866	-0.160666	0.13373	-1.20142	0.22959	0.846046
ENSMUSG00000024949	Sf1	225.505	-0.160734	0.133792	-1.20137	0.229607	0.846046
ENSMUSG00000027520	Zdbf2	357.852	-0.15435	0.128514	-1.20104	0.229737	0.846046
ENSMUSG00000030259	Rassf8	213.818	-0.191984	0.159605	-1.20287	0.229028	0.846046
ENSMUSG00000030279	C2cd5	167.41	0.171793	0.143015	1.20122	0.229665	0.846046
ENSMUSG00000031823	Zdhhc7	207.49	0.164543	0.136777	1.203	0.228975	0.846046
ENSMUSG00000021555	Naa35	153.33	0.17823	0.148686	1.1987	0.230646	0.848858
ENSMUSG00000002997	Prkar2b	192.64	0.161275	0.135055	1.19414	0.232425	0.84891
ENSMUSG00000003662	Ciao1	201.567	0.160207	0.136966	1.16968	0.242129	0.84891
ENSMUSG00000006010	Odr4	112.368	-0.194834	0.165629	-1.17633	0.239463	0.84891
ENSMUSG00000006676	Usp19	279.472	0.165634	0.139761	1.18512	0.235969	0.84891
ENSMUSG00000006736	Tspan31	199.353	-0.162183	0.138441	-1.17149	0.241401	0.84891
ENSMUSG00000007670	Khsrp	696.054	-0.120684	0.10315	-1.16999	0.242006	0.84891
ENSMUSG00000010517	Faf1	412.633	-0.152337	0.128821	-1.18256	0.236985	0.84891
ENSMUSG00000012848	Rps5	1365.42	-0.129045	0.109073	-1.18311	0.236765	0.84891
ENSMUSG00000014859	E2f4	300.376	-0.156229	0.131188	-1.19087	0.233703	0.84891
ENSMUSG00000015217	Hmgb3	248.82	-0.152387	0.130077	-1.17151	0.241394	0.84891
ENSMUSG00000017778	Cox7c	163.148	-0.192496	0.164887	-1.16744	0.243031	0.84891
ENSMUSG00000020402	Vdac1	766.941	0.125407	0.107456	1.16705	0.243191	0.84891
ENSMUSG00000020460	Rps27a	742.532	-0.144062	0.120704	-1.19351	0.232669	0.84891
ENSMUSG00000020706	Ftsj3	127.98	0.199166	0.166849	1.19369	0.232601	0.84891
ENSMUSG00000021366	Hivep1	277.925	-0.171195	0.144986	-1.18077	0.237694	0.84891
ENSMUSG00000021595	Nsun2	215.152	-0.155036	0.131081	-1.18275	0.236908	0.84891
ENSMUSG00000021610	Clptm1l	397.229	-0.134903	0.11379	-1.18554	0.235805	0.84891
ENSMUSG00000021945	Zmym2	301.529	-0.174215	0.145609	-1.19645	0.23152	0.84891
ENSMUSG00000023345	Poc1a	173.638	-0.173139	0.148068	-1.16932	0.242276	0.84891
ENSMUSG00000024042	Sik1	649.533	-0.145358	0.122564	-1.18597	0.235633	0.84891
ENSMUSG00000024050	Wiz	225.211	-0.161087	0.136366	-1.18128	0.237492	0.84891
ENSMUSG00000024241	Sos1	187.547	-0.175978	0.148241	-1.18711	0.235185	0.84891
ENSMUSG00000024583	Txnl1	324.775	-0.154184	0.130662	-1.18002	0.237994	0.84891
ENSMUSG00000025381	Cnpy2	119.987	-0.187675	0.157842	-1.18901	0.234437	0.84891
ENSMUSG00000025409	Mbd6	230.295	0.154101	0.129491	1.19005	0.234027	0.84891
ENSMUSG00000025757	Hspa4l	207.315	-0.164876	0.138182	-1.19318	0.232797	0.84891
ENSMUSG00000025855	Prkar1b	124.443	0.191035	0.16004	1.19367	0.232606	0.84891
ENSMUSG00000026281	Dtymk	270.421	-0.15459	0.13233	-1.16821	0.242722	0.84891
ENSMUSG00000026411	Tmem9	123.49	-0.191752	0.163256	-1.17455	0.240174	0.84891
ENSMUSG00000026608	Kctd3	120.468	0.201618	0.171461	1.17589	0.23964	0.84891
ENSMUSG00000027357	Crls1	117.277	0.184642	0.155888	1.18445	0.236235	0.84891
ENSMUSG00000027854	Sike1	130.582	-0.179929	0.152089	-1.18305	0.23679	0.84891
ENSMUSG00000028041	Adam15	137.711	0.207628	0.175891	1.18044	0.237827	0.84891
ENSMUSG00000028044	Cks1b	141.811	-0.187557	0.158056	-1.18664	0.235368	0.84891
ENSMUSG00000029196	Tada2b	191.836	-0.160364	0.13632	-1.17638	0.239441	0.84891
ENSMUSG00000029223	Uchl1	460.777	0.145437	0.121581	1.19622	0.231613	0.84891
ENSMUSG00000030265	Kras	217.514	-0.1694	0.142975	-1.18482	0.236087	0.84891
ENSMUSG00000030541	Idh2	435.439	-0.128938	0.110437	-1.16752	0.242999	0.84891
ENSMUSG00000031311	Nono	375.218	0.155337	0.131381	1.18234	0.237071	0.84891
ENSMUSG00000031527	Eri1	133.6	-0.181739	0.151986	-1.19576	0.23179	0.84891
ENSMUSG00000031803	B3gnt3	449.779	-0.143253	0.121892	-1.17525	0.239895	0.84891
ENSMUSG00000031904	Slc7a6	437.181	-0.16345	0.138025	-1.1842	0.236332	0.84891
ENSMUSG00000032050	Rdx	739.787	-0.129703	0.108968	-1.19028	0.233935	0.84891
ENSMUSG00000032224	Fam81a	214.886	-0.154487	0.131852	-1.17167	0.24133	0.84891
ENSMUSG00000032316	Clk3	125.626	-0.185277	0.157787	-1.17422	0.240305	0.84891
ENSMUSG00000032902	Slc16a1	206.714	-0.1609	0.13453	-1.19602	0.23169	0.84891
ENSMUSG00000032998	Foxj3	414.055	-0.130686	0.111125	-1.17603	0.239581	0.84891
ENSMUSG00000033061	Resp18	2139.98	-0.207066	0.17666	-1.17212	0.241149	0.84891
ENSMUSG00000033307	Mif	164.822	-0.184108	0.1568	-1.17416	0.240329	0.84891
ENSMUSG00000033417	Cacul1	563.974	-0.138909	0.118464	-1.17259	0.240961	0.84891
ENSMUSG00000034075	Zdhhc5	218.381	-0.182262	0.15286	-1.19235	0.233123	0.84891
ENSMUSG00000035967	Ints6l	265.475	-0.175747	0.149764	-1.17349	0.240599	0.84891
ENSMUSG00000036473	Tbc1d24	120.349	-0.192242	0.161916	-1.18729	0.235112	0.84891
ENSMUSG00000036499	Eea1	266.25	-0.159584	0.136345	-1.17044	0.241823	0.84891
ENSMUSG00000036565	Ttyh3	814.736	0.134778	0.112481	1.19822	0.23083	0.84891
ENSMUSG00000037326	Capn15	351.425	0.14908	0.126342	1.17997	0.238012	0.84891
ENSMUSG00000037514	Pank2	180.951	0.168396	0.141927	1.1865	0.235424	0.84891
ENSMUSG00000037608	Bclaf1	260.243	0.165446	0.139722	1.1841	0.236372	0.84891
ENSMUSG00000038175	Mylip	435.613	-0.14958	0.125511	-1.19178	0.233349	0.84891
ENSMUSG00000038416	Cdc16	339.279	-0.14969	0.12551	-1.19265	0.233007	0.84891
ENSMUSG00000038482	Tfdp1	443.68	0.149277	0.126907	1.17627	0.239488	0.84891
ENSMUSG00000038611	Phrf1	174.633	-0.168404	0.143468	-1.17381	0.240472	0.84891
ENSMUSG00000038828	Tmem214	474.449	-0.155292	0.132994	-1.16766	0.242943	0.84891
ENSMUSG00000038845	Phb	151.449	-0.17413	0.146932	-1.18511	0.235975	0.84891
ENSMUSG00000039356	Exosc2	125.853	0.190406	0.16114	1.18162	0.237357	0.84891
ENSMUSG00000040204	Pclaf	292.744	-0.147095	0.125109	-1.17573	0.239701	0.84891
ENSMUSG00000040412	5330417C22Rik	591.507	-0.124024	0.105897	-1.17118	0.241527	0.84891
ENSMUSG00000040797	Iqsec3	106.057	-0.191655	0.160303	-1.19558	0.23186	0.84891
ENSMUSG00000043300	B3galnt1	125.802	-0.185706	0.157684	-1.17771	0.238912	0.84891
ENSMUSG00000044783	Hjurp	959.738	-0.123334	0.103485	-1.1918	0.233339	0.84891
ENSMUSG00000046329	Slc25a23	214.413	0.161565	0.13652	1.18346	0.236629	0.84891
ENSMUSG00000047187	Rab2a	390.804	-0.13198	0.112975	-1.16822	0.242717	0.84891
ENSMUSG00000047714	Ppp1r2	120.413	-0.184542	0.156968	-1.17567	0.239729	0.84891
ENSMUSG00000050192	Eif5a2	109.732	-0.196959	0.167771	-1.17398	0.240405	0.84891
ENSMUSG00000050312	Nsun3	108.208	-0.191257	0.163651	-1.16869	0.242529	0.84891
ENSMUSG00000052331	Ankrd44	239.656	0.156201	0.132388	1.17987	0.238051	0.84891
ENSMUSG00000053536	Cstf2t	104.954	-0.190993	0.16107	-1.18578	0.235711	0.84891
ENSMUSG00000053693	Mast1	215.402	-0.152036	0.128988	-1.17868	0.238527	0.84891
ENSMUSG00000056629	Fkbp2	190.594	0.181559	0.152756	1.18856	0.234614	0.84891
ENSMUSG00000056999	Ide	179.679	-0.165159	0.13979	-1.18148	0.237413	0.84891
ENSMUSG00000060475	Wtap	154.285	-0.18377	0.153684	-1.19577	0.231787	0.84891
ENSMUSG00000063410	Stk24	113.096	0.186027	0.15605	1.1921	0.233222	0.84891
ENSMUSG00000066571	4931406P16Rik	148.512	-0.200912	0.170403	-1.17904	0.238381	0.84891
ENSMUSG00000071072	Ptges3	241.017	-0.155746	0.131	-1.18891	0.234477	0.84891
ENSMUSG00000071847	Apcdd1	206.278	-0.171765	0.146573	-1.17188	0.241247	0.84891
ENSMUSG00000074746	Pdzd8	410.579	-0.148263	0.127002	-1.1674	0.243047	0.84891
ENSMUSG00000001089	Luzp1	325.037	-0.159948	0.137258	-1.16531	0.243892	0.849899
ENSMUSG00000030788	Rnf141	626.62	0.131748	0.113132	1.16454	0.244204	0.849899
ENSMUSG00000044600	Smim7	385.09	-0.167831	0.144033	-1.16523	0.243927	0.849899
ENSMUSG00000049878	Rlf	271.337	-0.157958	0.135635	-1.16458	0.244189	0.849899
ENSMUSG00000061461	Smim20	189.492	-0.169236	0.145159	-1.16586	0.243669	0.849899
ENSMUSG00000000708	Kat2b	148.488	-0.166127	0.144854	-1.14686	0.251441	0.850305
ENSMUSG00000004317	Clcn5	463.365	0.140819	0.12355	1.13977	0.254384	0.850305
ENSMUSG00000007891	Ctsd	733.786	-0.123742	0.107549	-1.15056	0.249914	0.850305
ENSMUSG00000012535	Tnpo3	238.128	0.15003	0.130793	1.14708	0.251348	0.850305
ENSMUSG00000013662	Atad1	363.104	-0.153459	0.133792	-1.14699	0.251385	0.850305
ENSMUSG00000017421	Zfp207	166.588	-0.178345	0.156153	-1.14212	0.253405	0.850305
ENSMUSG00000020315	Sptbn1	1445.61	-0.130272	0.112835	-1.15454	0.24828	0.850305
ENSMUSG00000020605	Hs1bp3	173.772	-0.164172	0.142224	-1.15432	0.24837	0.850305
ENSMUSG00000020612	Prkar1a	3194.23	-0.09337	0.0816809	-1.14311	0.252994	0.850305
ENSMUSG00000020741	Cluh	221.388	0.157558	0.137308	1.14748	0.251184	0.850305
ENSMUSG00000021248	Tmed10	868.838	-0.131918	0.115186	-1.14526	0.2521	0.850305
ENSMUSG00000022177	Haus4	108.886	-0.17878	0.154858	-1.15448	0.248304	0.850305
ENSMUSG00000022443	Myh9	1156.63	0.106647	0.0922544	1.15602	0.247675	0.850305
ENSMUSG00000022781	Pak2	210.545	0.193963	0.167163	1.16032	0.245918	0.850305
ENSMUSG00000022900	Ildr1	105.752	0.187022	0.161433	1.15851	0.246657	0.850305
ENSMUSG00000024002	Brd4	273.227	0.154111	0.132896	1.15963	0.246199	0.850305
ENSMUSG00000024548	Setbp1	189.02	-0.166702	0.144252	-1.15563	0.247834	0.850305
ENSMUSG00000024955	Esrra	131.6	0.19344	0.167409	1.15549	0.247889	0.850305
ENSMUSG00000025047	Pdcd11	176.677	0.155976	0.136851	1.13975	0.254391	0.850305
ENSMUSG00000025466	Fuom	298.81	-0.157899	0.137218	-1.15071	0.24985	0.850305
ENSMUSG00000026202	Tuba4a	628.55	-0.127491	0.110647	-1.15223	0.249225	0.850305
ENSMUSG00000026234	Ncl	347.862	0.159333	0.139697	1.14056	0.254052	0.850305
ENSMUSG00000026384	Ptpn4	463.826	-0.173086	0.149107	-1.16082	0.245716	0.850305
ENSMUSG00000026817	Ak1	115.532	0.174823	0.15318	1.14129	0.253749	0.850305
ENSMUSG00000026821	Ralgds	166.194	0.169746	0.146971	1.15496	0.248105	0.850305
ENSMUSG00000026867	Gapvd1	327.477	0.153926	0.13474	1.1424	0.25329	0.850305
ENSMUSG00000026944	Abca2	691.556	0.156143	0.13693	1.14031	0.254157	0.850305
ENSMUSG00000027194	Ttc17	466.791	-0.167388	0.145817	-1.14793	0.250999	0.850305
ENSMUSG00000028034	Fubp1	182.346	0.181395	0.157853	1.14914	0.250497	0.850305
ENSMUSG00000028988	Ctnnbip1	224.76	0.146944	0.128028	1.14775	0.251072	0.850305
ENSMUSG00000029207	Apbb2	181.385	-0.170582	0.147603	-1.15568	0.247811	0.850305
ENSMUSG00000029447	Cct6a	222.665	0.200222	0.174826	1.14526	0.2521	0.850305
ENSMUSG00000029560	Snx8	311.899	0.137298	0.119459	1.14933	0.250418	0.850305
ENSMUSG00000029840	Mtpn	441.656	-0.138025	0.12056	-1.14487	0.252263	0.850305
ENSMUSG00000030042	Pole4	370.779	0.152655	0.133899	1.14008	0.254253	0.850305
ENSMUSG00000031913	Vps4a	103.177	-0.192232	0.165573	-1.16101	0.245638	0.850305
ENSMUSG00000031960	Aars	831.89	0.127641	0.110727	1.15275	0.249012	0.850305
ENSMUSG00000032959	Pebp1	592.535	0.122413	0.107126	1.1427	0.253165	0.850305
ENSMUSG00000033065	Pfkm	106.372	0.179836	0.154898	1.161	0.245644	0.850305
ENSMUSG00000033209	Ttc28	519.052	0.156752	0.136056	1.15212	0.249272	0.850305
ENSMUSG00000034282	Evpl	139.799	0.178806	0.154613	1.15647	0.247488	0.850305
ENSMUSG00000035198	Tubg1	301.402	-0.143579	0.125585	-1.14328	0.252922	0.850305
ENSMUSG00000035311	Gnptab	1030	0.105955	0.0925056	1.14539	0.252049	0.850305
ENSMUSG00000036046	5031439G07Rik	484.841	0.155231	0.133555	1.16229	0.245117	0.850305
ENSMUSG00000036104	Rab3gap1	386.68	0.171857	0.149113	1.15253	0.249103	0.850305
ENSMUSG00000036273	Lrrk2	110.463	-0.189232	0.164847	-1.14792	0.251001	0.850305
ENSMUSG00000036678	Aaas	114.214	-0.17748	0.153144	-1.15891	0.246494	0.850305
ENSMUSG00000037098	Rab11fip3	163.52	0.180696	0.156999	1.15093	0.24976	0.850305
ENSMUSG00000037373	Ctbp1	293.081	0.176023	0.154403	1.14002	0.254278	0.850305
ENSMUSG00000039100	2006-03-01	1171.22	-0.135036	0.116764	-1.15649	0.247483	0.850305
ENSMUSG00000039126	Prune2	596.493	-0.145065	0.124831	-1.16209	0.245199	0.850305
ENSMUSG00000041164	Zmiz2	395.544	-0.15629	0.136358	-1.14618	0.251721	0.850305
ENSMUSG00000041408	Wapl	450.377	0.208092	0.180089	1.15549	0.247889	0.850305
ENSMUSG00000041997	Tlk1	270.948	-0.182617	0.159582	-1.14435	0.25248	0.850305
ENSMUSG00000042046	Dstyk	144.618	0.171419	0.148187	1.15678	0.247363	0.850305
ENSMUSG00000042834	Nrep	801.117	-0.124996	0.107944	-1.15796	0.246879	0.850305
ENSMUSG00000044221	Grsf1	199.089	-0.160795	0.139156	-1.1555	0.247885	0.850305
ENSMUSG00000052146	Rps10	131.822	-0.184416	0.158534	-1.16326	0.244726	0.850305
ENSMUSG00000053334	Ficd	150.177	-0.171314	0.147924	-1.15812	0.246813	0.850305
ENSMUSG00000057672	Pkn1	397.808	0.176794	0.15492	1.14119	0.253789	0.850305
ENSMUSG00000061032	Rrp1	157.759	0.162904	0.142483	1.14333	0.252902	0.850305
ENSMUSG00000061175	Fnip2	468.833	-0.131971	0.114868	-1.1489	0.250599	0.850305
ENSMUSG00000061273	Mmgt1	238.46	-0.175747	0.153691	-1.14351	0.252827	0.850305
ENSMUSG00000063015	Ccni	266.938	-0.158441	0.137669	-1.15088	0.249781	0.850305
ENSMUSG00000063895	Nupl1	212.3	-0.180294	0.157038	-1.14809	0.250932	0.850305
ENSMUSG00000070934	Rraga	220.799	-0.164287	0.142993	-1.14891	0.250593	0.850305
ENSMUSG00000073411	H2-D1	727.471	-0.11497	0.0994111	-1.15651	0.247471	0.850305
ENSMUSG00000100750	Gm29084	1049.85	-0.109089	0.0954876	-1.14244	0.253269	0.850305
ENSMUSG00000111624	Ide	178.998	-0.160789	0.139887	-1.14942	0.250381	0.850305
ENSMUSG00000038299	Wdr36	122.06	-0.172831	0.151795	-1.13858	0.254878	0.851446
ENSMUSG00000022193	Psmb5	426.504	-0.1362	0.119683	-1.13801	0.255117	0.851755
ENSMUSG00000002319	Ipo4	169.228	0.177056	0.155764	1.13669	0.255666	0.852077
ENSMUSG00000025324	Atp10a	110.253	0.178768	0.157382	1.13589	0.256004	0.852077
ENSMUSG00000027312	Atrn	302.741	0.137271	0.120871	1.13568	0.256091	0.852077
ENSMUSG00000029516	Cit	256.998	0.169384	0.149016	1.13668	0.25567	0.852077
ENSMUSG00000038644	Pold1	143.351	0.169288	0.148987	1.13626	0.255848	0.852077
ENSMUSG00000056004	9330182L06Rik	294.883	-0.159104	0.139908	-1.1372	0.255453	0.852077
ENSMUSG00000020697	Lig3	156.169	0.179905	0.158785	1.13301	0.25721	0.853361
ENSMUSG00000023861	Mpc1	217.687	0.189109	0.166788	1.13382	0.256868	0.853361
ENSMUSG00000023942	Slc29a1	220.571	-0.155427	0.137157	-1.13321	0.257127	0.853361
ENSMUSG00000033055	Ankrd54	110.444	0.182753	0.161288	1.13308	0.257179	0.853361
ENSMUSG00000039959	Hip1	185.023	0.171407	0.151271	1.13311	0.257168	0.853361
ENSMUSG00000017943	Gdap1l1	236.294	0.172558	0.152445	1.13193	0.257663	0.85378
ENSMUSG00000023452	Pisd	145.682	0.167903	0.148368	1.13167	0.257775	0.85378
ENSMUSG00000046836	Brox	143.904	-0.171029	0.151055	-1.13223	0.257536	0.85378
ENSMUSG00000002010	Idh3g	197.811	-0.170987	0.154438	-1.10716	0.268226	0.855875
ENSMUSG00000005103	Wdr1	274.8	-0.140443	0.12532	-1.12068	0.262424	0.855875
ENSMUSG00000007594	Hapln4	199.106	0.151264	0.136386	1.10909	0.267391	0.855875
ENSMUSG00000011884	Gltp	154.437	-0.163608	0.146703	-1.11523	0.264751	0.855875
ENSMUSG00000014599	Csf1	254.033	0.145135	0.131717	1.10188	0.270516	0.855875
ENSMUSG00000014905	Dnajb9	1290.47	-0.197505	0.175186	-1.1274	0.259572	0.855875
ENSMUSG00000015222	Map2	650.138	-0.148243	0.132309	-1.12043	0.26253	0.855875
ENSMUSG00000016831	Tox4	183.829	-0.169395	0.152589	-1.11013	0.266942	0.855875
ENSMUSG00000018326	Ywhab	609.327	-0.130046	0.117836	-1.10363	0.269756	0.855875
ENSMUSG00000018427	Ypel2	342.976	-0.154869	0.140576	-1.10168	0.270603	0.855875
ENSMUSG00000019731	Slc35e1	514.861	-0.127003	0.113083	-1.12309	0.261398	0.855875
ENSMUSG00000020440	Arf5	554.606	0.123858	0.110558	1.12029	0.262588	0.855875
ENSMUSG00000020585	Laptm4a	427.339	-0.158689	0.143569	-1.10532	0.269023	0.855875
ENSMUSG00000020694	Tlk2	111.897	-0.173143	0.154357	-1.1217	0.261989	0.855875
ENSMUSG00000020818	Mfsd11	454.608	0.128607	0.116809	1.101	0.270895	0.855875
ENSMUSG00000021697	Depdc1b	110.644	-0.186277	0.16677	-1.11697	0.264007	0.855875
ENSMUSG00000022472	Desi1	496.109	-0.141681	0.125794	-1.1263	0.26004	0.855875
ENSMUSG00000023087	Noct	3275.3	-0.0979003	0.0882496	-1.10936	0.267276	0.855875
ENSMUSG00000024120	Lrpprc	516.362	0.121366	0.107429	1.12973	0.25859	0.855875
ENSMUSG00000024222	Fkbp5	144.269	0.16373	0.148169	1.10502	0.269153	0.855875
ENSMUSG00000024360	Etf1	316.223	-0.137041	0.123927	-1.10581	0.268807	0.855875
ENSMUSG00000024646	Cyb5a	170.54	-0.159987	0.14419	-1.10956	0.267189	0.855875
ENSMUSG00000025582	Nptx1	341.308	-0.142229	0.128356	-1.10808	0.267827	0.855875
ENSMUSG00000025616	Usp16	139.508	0.161295	0.144735	1.11442	0.265099	0.855875
ENSMUSG00000025809	Itgb1	1109.69	-0.119032	0.106915	-1.11333	0.265568	0.855875
ENSMUSG00000026176	Ctdsp1	384.815	-0.140604	0.124511	-1.12925	0.258792	0.855875
ENSMUSG00000026439	Rbbp5	104.242	0.181751	0.163071	1.11455	0.265042	0.855875
ENSMUSG00000026626	Ppp2r5a	177.768	0.200709	0.179611	1.11747	0.263796	0.855875
ENSMUSG00000026687	Aldh9a1	126.275	-0.171199	0.154234	-1.11	0.267	0.855875
ENSMUSG00000026889	Rbm18	115.828	0.175065	0.156578	1.11807	0.263537	0.855875
ENSMUSG00000027236	Eif3j1	103.42	-0.183882	0.167002	-1.10108	0.270862	0.855875
ENSMUSG00000027244	Atg13	216.241	0.152792	0.135563	1.12709	0.259705	0.855875
ENSMUSG00000027342	Pcna	328.191	-0.148011	0.133242	-1.11085	0.266635	0.855875
ENSMUSG00000027566	Psma7	137.105	-0.165075	0.149505	-1.10414	0.26953	0.855875
ENSMUSG00000027575	Arfgap1	206.01	0.153879	0.137824	1.11649	0.264212	0.855875
ENSMUSG00000027690	Slc2a2	174.034	0.166679	0.151179	1.10253	0.270232	0.855875
ENSMUSG00000027953	Slc50a1	185.134	-0.16156	0.144251	-1.11999	0.262718	0.855875
ENSMUSG00000028278	Rragd	172.96	-0.153799	0.138689	-1.10894	0.267454	0.855875
ENSMUSG00000028668	Eloa	118.523	-0.170852	0.152973	-1.11688	0.264045	0.855875
ENSMUSG00000028719	Cmpk1	234.685	-0.143861	0.130169	-1.10519	0.269078	0.855875
ENSMUSG00000029192	Tbc1d14	246.118	0.147366	0.130688	1.12761	0.259483	0.855875
ENSMUSG00000029713	Gnb2	538.893	-0.136947	0.122364	-1.11918	0.263064	0.855875
ENSMUSG00000030254	Rad18	125	-0.174171	0.156664	-1.11175	0.266245	0.855875
ENSMUSG00000030407	Qpctl	115.959	-0.167187	0.151399	-1.10428	0.26947	0.855875
ENSMUSG00000030842	Lamtor1	152.696	-0.160834	0.145577	-1.1048	0.269246	0.855875
ENSMUSG00000030884	Uqcrc2	287.284	0.15199	0.137749	1.10339	0.26986	0.855875
ENSMUSG00000031154	Otud5	109.642	0.179491	0.159924	1.12235	0.261713	0.855875
ENSMUSG00000032220	Myo1e	483.864	-0.132443	0.120198	-1.10187	0.270517	0.855875
ENSMUSG00000032786	Alas1	147.588	-0.167472	0.150821	-1.1104	0.266827	0.855875
ENSMUSG00000034349	Smc4	205.957	-0.153943	0.138824	-1.1089	0.267471	0.855875
ENSMUSG00000034460	Six4	210.271	-0.156941	0.140749	-1.11504	0.264833	0.855875
ENSMUSG00000034931	Dhx8	286.06	-0.145942	0.132117	-1.10464	0.269315	0.855875
ENSMUSG00000036751	Cox6b1	244.75	0.159797	0.144955	1.10239	0.270292	0.855875
ENSMUSG00000037376	Trmt6	111.953	-0.176722	0.157682	-1.12075	0.262394	0.855875
ENSMUSG00000038084	Opa1	156.372	-0.163125	0.147374	-1.10687	0.268348	0.855875
ENSMUSG00000038235	F11r	135.033	0.176341	0.158422	1.11311	0.265663	0.855875
ENSMUSG00000038495	Otud7b	177.398	0.182695	0.165839	1.10164	0.27062	0.855875
ENSMUSG00000038764	Ptpn3	517.19	-0.115117	0.102857	-1.11919	0.263059	0.855875
ENSMUSG00000038909	Kat7	216.894	-0.145702	0.129728	-1.12313	0.261381	0.855875
ENSMUSG00000040043	Rbms2	133.969	-0.167371	0.150029	-1.11559	0.2646	0.855875
ENSMUSG00000040044	Orc3	136.461	0.171809	0.152926	1.12348	0.261233	0.855875
ENSMUSG00000040302	Rbm48	117.227	-0.189399	0.169451	-1.11773	0.263684	0.855875
ENSMUSG00000040661	Rad54l2	264.205	0.140519	0.127318	1.10369	0.269727	0.855875
ENSMUSG00000040928	S100pbp	566.645	-0.139008	0.125861	-1.10446	0.269396	0.855875
ENSMUSG00000041268	Dmxl2	397.308	-0.142133	0.126818	-1.12077	0.262388	0.855875
ENSMUSG00000041560	Nop53	106.455	0.177821	0.159224	1.11679	0.264083	0.855875
ENSMUSG00000041702	Btbd7	114.149	-0.180028	0.159739	-1.12701	0.259739	0.855875
ENSMUSG00000046447	Camk2n1	1838.2	-0.100207	0.090288	-1.10986	0.267057	0.855875
ENSMUSG00000048490	Nrip1	162.804	0.158109	0.141191	1.11982	0.262788	0.855875
ENSMUSG00000050705	2310061I04Rik	152.998	-0.159291	0.144015	-1.10607	0.268697	0.855875
ENSMUSG00000052738	Suclg1	105.299	0.174773	0.156998	1.11322	0.265616	0.855875
ENSMUSG00000053293	Pom121	492.127	-0.133219	0.118294	-1.12617	0.260092	0.855875
ENSMUSG00000057342	Sphk2	293.265	-0.139109	0.123216	-1.12899	0.258904	0.855875
ENSMUSG00000058013	2011-09-01	253.751	-0.138169	0.123454	-1.11919	0.263057	0.855875
ENSMUSG00000059981	Taok2	593.962	0.120396	0.107481	1.12016	0.262646	0.855875
ENSMUSG00000060279	Ap2a1	499.039	-0.13087	0.117736	-1.11156	0.266328	0.855875
ENSMUSG00000062933	Gm10123	343.739	-0.202725	0.182775	-1.10915	0.267367	0.855875
ENSMUSG00000064341	mt-Nd1	2023.32	-0.205486	0.18233	-1.127	0.259742	0.855875
ENSMUSG00000072772	Grcc10	123.147	-0.171742	0.154224	-1.11359	0.265456	0.855875
ENSMUSG00000079317	Trappc2	104.979	-0.180311	0.163577	-1.1023	0.270331	0.855875
ENSMUSG00000083365	Gm12895	19703.6	0.18252	0.163393	1.11706	0.26397	0.855875
ENSMUSG00000083558	Gm12896	19703.4	0.182526	0.163394	1.11709	0.263956	0.855875
ENSMUSG00000089832	Shkbp1	137.7	-0.171202	0.153269	-1.117	0.263993	0.855875
ENSMUSG00000092837	Rpph1	725.819	-0.20057	0.177814	-1.12797	0.259331	0.855875
ENSMUSG00000106949	Gm12895	19703.8	0.182527	0.163394	1.11709	0.263954	0.855875
ENSMUSG00000002107	Celf2	276.805	0.136536	0.124238	1.09899	0.271774	0.857257
ENSMUSG00000040270	Bach2	286.437	-0.150664	0.137023	-1.09955	0.271528	0.857257
ENSMUSG00000043411	Usp48	239.28	0.165175	0.150256	1.09929	0.271642	0.857257
ENSMUSG00000030374	Strn4	413.048	0.153291	0.139532	1.09861	0.27194	0.857318
ENSMUSG00000011960	Ccnt1	482.687	0.137225	0.124984	1.09794	0.272233	0.857776
ENSMUSG00000006390	Elovl1	298.8	0.161082	0.147262	1.09385	0.274022	0.85822
ENSMUSG00000015143	Actn1	270.779	-0.13831	0.126475	-1.09358	0.274141	0.85822
ENSMUSG00000021198	Unc79	218.415	-0.143793	0.131443	-1.09396	0.273973	0.85822
ENSMUSG00000021395	Spin1	119.094	-0.166111	0.151826	-1.09409	0.273916	0.85822
ENSMUSG00000024966	Stip1	175.707	-0.167785	0.153342	-1.09419	0.273872	0.85822
ENSMUSG00000025871	4833439L19Rik	215.239	-0.15921	0.145402	-1.09497	0.273532	0.85822
ENSMUSG00000033326	Kdm4a	112.373	-0.169379	0.154849	-1.09383	0.27403	0.85822
ENSMUSG00000040054	Baz2a	528.7	0.111729	0.101985	1.09555	0.273276	0.85822
ENSMUSG00000041870	Ankrd13a	185.577	0.150299	0.1374	1.09388	0.274008	0.85822
ENSMUSG00000045767	B230219D22Rik	279.96	-0.14426	0.131587	-1.09631	0.272944	0.85822
ENSMUSG00000047098	Rnf31	146.831	0.173035	0.157925	1.09568	0.273219	0.85822
ENSMUSG00000059323	Tonsl	313.531	-0.13494	0.123005	-1.09703	0.272629	0.85822
ENSMUSG00000020484	Xbp1	572.544	-0.112785	0.10341	-1.09066	0.275424	0.858579
ENSMUSG00000023020	Cox14	127.501	0.167115	0.153266	1.09035	0.275558	0.858579
ENSMUSG00000029714	Gigyf1	848.384	0.127031	0.116245	1.09279	0.274488	0.858579
ENSMUSG00000029992	Gfpt1	719.74	0.127338	0.116664	1.09149	0.275056	0.858579
ENSMUSG00000033658	Ddx19b	141.829	0.15825	0.14505	1.09101	0.27527	0.858579
ENSMUSG00000033849	B3galt2	108.104	-0.183449	0.168058	-1.09158	0.275016	0.858579
ENSMUSG00000035284	Vps13c	613.919	-0.128444	0.117806	-1.0903	0.275582	0.858579
ENSMUSG00000047036	Zfp445	222.126	-0.151689	0.138944	-1.09173	0.274951	0.858579
ENSMUSG00000061559	Wdr61	168.933	-0.159498	0.146155	-1.09129	0.275144	0.858579
ENSMUSG00000021676	Iqgap2	303.468	-0.148563	0.136335	-1.08969	0.27585	0.858953
ENSMUSG00000021051	Ppp2r5e	117.614	-0.171811	0.157846	-1.08847	0.276386	0.859704
ENSMUSG00000068921	Dap3	130.515	-0.165557	0.152081	-1.08861	0.276324	0.859704
ENSMUSG00000017418	Arl5b	221.859	-0.148503	0.136552	-1.08752	0.276807	0.859718
ENSMUSG00000020580	Rock2	178.26	-0.1532	0.140879	-1.08746	0.276833	0.859718
ENSMUSG00000022394	L3mbtl2	124.517	0.170819	0.157017	1.0879	0.276639	0.859718
ENSMUSG00000018974	Sart3	103.735	-0.1805	0.166075	-1.08686	0.2771	0.860089
ENSMUSG00000049112	Oxtr	291.031	-0.140611	0.129414	-1.08652	0.277251	0.860097
ENSMUSG00000032485	Scap	207.794	-0.14373	0.132379	-1.08575	0.277591	0.860695
ENSMUSG00000005936	Kctd20	456.991	-0.127096	0.117339	-1.08315	0.27874	0.861049
ENSMUSG00000028744	Pqlc2	207.292	-0.153214	0.141353	-1.08391	0.278406	0.861049
ENSMUSG00000041959	S100a10	177.861	-0.173752	0.16035	-1.08358	0.278551	0.861049
ENSMUSG00000047539	Fbxo28	276.912	-0.15112	0.139325	-1.08466	0.278072	0.861049
ENSMUSG00000050711	Scg2	3241.12	-0.125785	0.116107	-1.08336	0.27865	0.861049
ENSMUSG00000057637	Prdm2	284.879	-0.147414	0.136009	-1.08386	0.278427	0.861049
ENSMUSG00000093930	Hmgcs1	852.875	0.113062	0.104228	1.08476	0.278026	0.861049
ENSMUSG00000032740	Ccdc88a	209.69	-0.145496	0.134451	-1.08215	0.279185	0.861967
ENSMUSG00000053565	Eif3k	160.847	-0.154947	0.14328	-1.08143	0.279505	0.862499
ENSMUSG00000022561	Gpaa1	647.268	-0.11976	0.110854	-1.08034	0.279993	0.862633
ENSMUSG00000027581	Stmn3	160.192	0.158523	0.146719	1.08045	0.27994	0.862633
ENSMUSG00000028649	Macf1	1152.86	-0.106006	0.0980988	-1.0806	0.279874	0.862633
ENSMUSG00000020628	Trappc12	325.585	-0.139457	0.129186	-1.07951	0.280359	0.863279
ENSMUSG00000022865	Cxadr	187.248	0.157953	0.146632	1.07721	0.281386	0.863279
ENSMUSG00000024759	Atl3	536.837	-0.127982	0.118754	-1.07771	0.281161	0.863279
ENSMUSG00000027313	Chac1	276.795	-0.156477	0.145068	-1.07864	0.280748	0.863279
ENSMUSG00000034557	Zfyve9	123.561	-0.172632	0.160181	-1.07773	0.281155	0.863279
ENSMUSG00000037563	Rps16	236.939	-0.173292	0.160605	-1.079	0.280589	0.863279
ENSMUSG00000055932	Fto	208.898	-0.144514	0.134157	-1.07721	0.281388	0.863279
ENSMUSG00000065954	Tacc1	175.857	0.165339	0.153313	1.07844	0.280839	0.863279
ENSMUSG00000018765	Fxr2	335.809	0.129567	0.120398	1.07615	0.281859	0.86427
ENSMUSG00000021686	Ap3b1	170.497	-0.149281	0.138786	-1.07562	0.282098	0.86428
ENSMUSG00000063576	Klhdc3	1071.37	-0.111662	0.103825	-1.07548	0.282159	0.86428
ENSMUSG00000025144	Cenpx	128.567	-0.173945	0.162082	-1.07319	0.283186	0.865647
ENSMUSG00000032112	Trappc4	1401.95	0.11293	0.105198	1.0735	0.283047	0.865647
ENSMUSG00000041264	Uspl1	292.526	-0.136827	0.127539	-1.07283	0.283349	0.865647
ENSMUSG00000069020	Urm1	251.564	-0.156858	0.146098	-1.07365	0.282981	0.865647
ENSMUSG00000093674	Rpl41	706.236	-0.116606	0.108683	-1.07289	0.283319	0.865647
ENSMUSG00000059070	Rpl18	562.357	0.133819	0.124779	1.07245	0.283517	0.865707
ENSMUSG00000004897	Hdgf	184.449	0.157422	0.147356	1.06831	0.285381	0.866405
ENSMUSG00000020271	Fbxw11	223.731	-0.148334	0.138789	-1.06877	0.285173	0.866405
ENSMUSG00000025189	Cnnm1	116.48	-0.167251	0.1563	-1.07006	0.284592	0.866405
ENSMUSG00000027522	Stx16	206.214	-0.171399	0.160231	-1.0697	0.284755	0.866405
ENSMUSG00000028902	Sf3a3	125.028	0.163222	0.152481	1.07044	0.284419	0.866405
ENSMUSG00000031570	Plpp5	146.293	-0.162063	0.151556	-1.06933	0.284922	0.866405
ENSMUSG00000041740	Rnf10	410.018	0.160726	0.150367	1.06889	0.285118	0.866405
ENSMUSG00000057716	Tmem178b	114.845	-0.164088	0.153579	-1.06843	0.285329	0.866405
ENSMUSG00000061613	U2af1	184.06	0.150711	0.141016	1.06875	0.285182	0.866405
ENSMUSG00000064105	Cnnm2	154.964	-0.153456	0.143257	-1.0712	0.28408	0.866405
ENSMUSG00000064368	mt-Nd6	635.997	-0.143565	0.133983	-1.07152	0.283936	0.866405
ENSMUSG00000019988	Nedd1	118.847	-0.177475	0.166378	-1.0667	0.286107	0.867705
ENSMUSG00000028528	Dnajc6	274.279	0.149223	0.139866	1.0669	0.286017	0.867705
ENSMUSG00000043733	Ptpn11	984.711	0.107925	0.101236	1.06607	0.286393	0.867757
ENSMUSG00000089715	Cbx6	1272.67	0.0933462	0.0875666	1.066	0.286422	0.867757
ENSMUSG00000004865	Srpk1	411.905	0.154124	0.145052	1.06254	0.287991	0.868565
ENSMUSG00000005312	Ubqln1	350.157	-0.136109	0.127884	-1.06432	0.287184	0.868565
ENSMUSG00000020740	Gga3	403.028	0.149301	0.140292	1.06422	0.287231	0.868565
ENSMUSG00000022945	Chaf1b	121.451	-0.162653	0.153056	-1.06271	0.287915	0.868565
ENSMUSG00000025544	Tm9sf2	853.615	-0.110476	0.103832	-1.06398	0.287336	0.868565
ENSMUSG00000026275	Ppp1r7	191.233	0.160287	0.150536	1.06478	0.286976	0.868565
ENSMUSG00000029467	Atp2a2	7352.45	0.0891143	0.0838761	1.06245	0.288031	0.868565
ENSMUSG00000031796	Cfap20	226.705	-0.153897	0.144699	-1.06357	0.287524	0.868565
ENSMUSG00000031996	Aplp2	668.437	-0.124766	0.11739	-1.06283	0.28786	0.868565
ENSMUSG00000020792	Exoc7	107.114	0.180825	0.170492	1.06061	0.288869	0.868875
ENSMUSG00000027660	Skil	347.17	-0.13441	0.126598	-1.06171	0.288368	0.868875
ENSMUSG00000028688	Toe1	119.807	-0.165563	0.156077	-1.06077	0.288792	0.868875
ENSMUSG00000035954	Dock4	158.703	-0.154393	0.145618	-1.06026	0.289029	0.868875
ENSMUSG00000036810	Cnep1r1	129.702	-0.169578	0.159856	-1.06082	0.288771	0.868875
ENSMUSG00000047412	Zbtb44	130.393	0.161563	0.152336	1.06057	0.288885	0.868875
ENSMUSG00000020922	Lsm12	240.303	-0.15542	0.146744	-1.05912	0.289544	0.869491
ENSMUSG00000031532	Saraf	665.079	0.109059	0.103033	1.05849	0.28983	0.869491
ENSMUSG00000038502	Ptov1	186.59	0.152729	0.144254	1.05875	0.289715	0.869491
ENSMUSG00000040675	Mthfd1l	234.504	0.139282	0.131476	1.05937	0.289432	0.869491
ENSMUSG00000042364	Snx18	157.079	-0.149849	0.141828	-1.05655	0.290716	0.871699
ENSMUSG00000020492	Ska2	463.87	-0.125476	0.118896	-1.05534	0.29127	0.872461
ENSMUSG00000034341	Wbp2	219.497	-0.156197	0.147988	-1.05547	0.291211	0.872461
ENSMUSG00000024242	Map4k3	151.888	-0.165951	0.157387	-1.05442	0.291692	0.873278
ENSMUSG00000071253	Slc25a16	208.693	0.144027	0.136674	1.0538	0.291975	0.873676
ENSMUSG00000009293	Ube2g2	308.147	-0.127765	0.121318	-1.05313	0.292279	0.874137
ENSMUSG00000079020	Slc45a4	117.074	0.171298	0.162752	1.05251	0.292565	0.874544
ENSMUSG00000039910	Cited2	161.926	-0.159736	0.151872	-1.05178	0.2929	0.875096
ENSMUSG00000049539	Hist1h1a	164.734	-0.149066	0.141813	-1.05114	0.293192	0.875519
ENSMUSG00000002409	Dyrk1b	116.152	-0.167814	0.159755	-1.05044	0.293515	0.875963
ENSMUSG00000010205	Raver1	316.415	-0.141098	0.134441	-1.04951	0.293942	0.875963
ENSMUSG00000020864	Ankrd40	188.324	0.153355	0.146102	1.04964	0.293883	0.875963
ENSMUSG00000025227	Mfsd13a	130.025	0.158837	0.151302	1.0498	0.293809	0.875963
ENSMUSG00000034621	Gpatch8	237.999	-0.154652	0.147419	-1.04907	0.294148	0.876128
ENSMUSG00000056204	Pgpep1	137.033	0.184747	0.176363	1.04754	0.294852	0.877775
ENSMUSG00000006442	Srm	503.241	-0.130965	0.125177	-1.04624	0.295452	0.878384
ENSMUSG00000031681	Smad1	130.865	-0.154506	0.147779	-1.04552	0.29578	0.878384
ENSMUSG00000042700	Sipa1l1	308.394	-0.138278	0.132265	-1.04546	0.29581	0.878384
ENSMUSG00000048000	Gigyf2	280.926	-0.14874	0.142207	-1.04594	0.295587	0.878384
ENSMUSG00000072082	Ccnf	2210.44	-0.120457	0.115133	-1.04624	0.295449	0.878384
ENSMUSG00000026434	Nucks1	785.178	0.105417	0.100868	1.0451	0.295977	0.878431
ENSMUSG00000037315	Jade3	136.947	-0.159904	0.153142	-1.04416	0.296413	0.879277
ENSMUSG00000032338	Hcn4	255.295	0.133023	0.127516	1.04319	0.296862	0.879303
ENSMUSG00000037725	Ckap2	139.617	-0.164404	0.157602	-1.04316	0.296874	0.879303
ENSMUSG00000066306	Numa1	323.968	0.141151	0.135252	1.04362	0.296661	0.879303
ENSMUSG00000037902	Sirpa	550.834	0.109609	0.105174	1.04217	0.297333	0.880216
ENSMUSG00000007036	Abhd16a	142.725	0.150616	0.145024	1.03856	0.299009	0.881615
ENSMUSG00000019900	Rfx6	636.301	-0.131804	0.126882	-1.03879	0.2989	0.881615
ENSMUSG00000021244	Ylpm1	298.237	-0.132286	0.127403	-1.03833	0.299117	0.881615
ENSMUSG00000022897	Dyrk1a	947.279	-0.123343	0.118829	-1.03798	0.299279	0.881615
ENSMUSG00000029050	Ski	207.865	-0.137209	0.132001	-1.03946	0.298593	0.881615
ENSMUSG00000029621	Arpc1a	324.196	-0.132252	0.127261	-1.03922	0.298704	0.881615
ENSMUSG00000030126	Tmcc1	326.598	0.168522	0.162111	1.03955	0.298549	0.881615
ENSMUSG00000031176	Dynlt3	186.343	-0.171865	0.165532	-1.03826	0.299151	0.881615
ENSMUSG00000037104	Socs5	114.284	0.162608	0.156671	1.03789	0.299319	0.881615
ENSMUSG00000061576	Dpp6	107.75	0.171744	0.165144	1.03996	0.298357	0.881615
ENSMUSG00000029544	Cabp1	166.124	0.14777	0.142578	1.03642	0.300007	0.882302
ENSMUSG00000060261	Gtf2i	343.262	-0.128865	0.124306	-1.03667	0.299888	0.882302
ENSMUSG00000078670	Fam174b	316.618	0.131464	0.126795	1.03683	0.299817	0.882302
ENSMUSG00000004460	Dnajb11	334.838	-0.133743	0.129313	-1.03425	0.301019	0.88243
ENSMUSG00000004846	Plod3	273.879	0.140408	0.136201	1.03089	0.302593	0.88243
ENSMUSG00000013465	Nelfb	148.421	0.153438	0.148773	1.03136	0.302374	0.88243
ENSMUSG00000019917	2010-09-01	119.484	-0.164669	0.159688	-1.0312	0.302448	0.88243
ENSMUSG00000021578	Ccdc127	180.738	-0.150576	0.145963	-1.03161	0.302256	0.88243
ENSMUSG00000022000	Zc3h13	110.628	0.162325	0.156881	1.0347	0.300808	0.88243
ENSMUSG00000022836	Mylk	113.617	-0.159534	0.154528	-1.0324	0.301886	0.88243
ENSMUSG00000023150	Ivns1abp	287.687	-0.131177	0.126937	-1.0334	0.301415	0.88243
ENSMUSG00000025647	Shisa5	251.599	-0.147113	0.142714	-1.03082	0.302625	0.88243
ENSMUSG00000025730	Rab40c	159.262	0.150146	0.145362	1.03291	0.301646	0.88243
ENSMUSG00000027809	Etfdh	170.234	0.14629	0.141375	1.03477	0.300778	0.88243
ENSMUSG00000028962	Slc4a2	216.806	0.14607	0.141306	1.03372	0.301269	0.88243
ENSMUSG00000031770	Herpud1	466.193	-0.129798	0.125714	-1.03248	0.301845	0.88243
ENSMUSG00000038990	Cables2	116.077	-0.159644	0.154359	-1.03424	0.301025	0.88243
ENSMUSG00000042873	Lhfpl4	494.74	0.122417	0.118687	1.03142	0.302342	0.88243
ENSMUSG00000047921	Trappc9	241.261	-0.138166	0.133964	-1.03137	0.302366	0.88243
ENSMUSG00000063253	Scoc	218.349	-0.150583	0.145851	-1.03244	0.301866	0.88243
ENSMUSG00000046658	Zfp316	113.657	0.172204	0.167178	1.03006	0.302981	0.883025
ENSMUSG00000015027	Galns	269.662	-0.146831	0.142895	-1.02754	0.304167	0.883578
ENSMUSG00000020029	Nudt4	155.086	-0.152797	0.148769	-1.02708	0.304384	0.883578
[truncated: 3,823 more rows]

## Sheet: RIP_RNA_detected genes
Supplemental Table 1. RIP-RNA/T-RNA ratio: RIP/T-RNA column shows the ratio RIP-RNA Fold change to T-RNA Fold change of all genes detected in both datasets in MIN6 cells transfected with miR-125b mimics vs control.
Gene.name	Gene.stable.ID	baseMean_RNA	log2FoldChange_RNA	lfcSE_RNA	stat_RNA	pvalue_T-RNA	padj_T-RNA	baseMean_RIP	log2FoldChange_RIP	lfcSE_RIP	stat_RIP	pvalue_RIP	padj_RIP	FoldChange_T-RNA	FoldChange_RIP	RIP/T-RNA	Log2FoldChangeRIP_RNA
Taz	ENSMUSG00000009995	1071.19	-0.184135	0.0780494	-2.35921	0.0183137	0.213188	95.5737	1.13458	0.19877	5.70801	1.14e-08	1.31e-05	0.880176	2.19555	2.49444	1.31872
M6pr	ENSMUSG00000007458	4999.72	-0.290228	0.0722733	-4.0157	5.93e-05	0.00550167	746.59	1.02798	0.131802	7.79944	6.22e-15	1.31e-11	0.817773	2.03917	2.49356	1.31821
Tor2a	ENSMUSG00000009563	1725.61	-0.47076	0.106729	-4.41081	1.03e-05	0.00154954	299.345	0.837006	0.158261	5.28877	1.23e-07	8.19e-05	0.721584	1.78634	2.47558	1.30777
Mtfp1	ENSMUSG00000004748	522.471	-0.392394	0.109173	-3.59424	0.000325336	0.0179701	125.257	0.899535	0.180315	4.98868	6.08e-07	0.00033412	0.761865	1.86546	2.44855	1.29193
Tnks1bp1	ENSMUSG00000033955	949.543	-0.108726	0.0787114	-1.38132	0.167181	0.606598	128.758	1.13351	0.188767	6.00482	1.92e-09	2.42e-06	0.927407	2.19392	2.36565	1.24223
Gnpat	ENSMUSG00000031985	2720.32	-0.150527	0.0850564	-1.76973	0.0767716	0.439677	1421.05	1.04733	0.11651	8.98917	2.49e-19	7.87e-16	0.900921	2.0667	2.29398	1.19785
Gm47356	ENSMUSG00000111436	77.0721	-0.203108	0.14549	-1.39603	0.162705	0.601576	81.9276	0.974282	0.216843	4.49304	7.02e-06	0.0024655	0.868677	1.96466	2.26167	1.17739
Trnp1	ENSMUSG00000056596	3678.43	0.0250769	0.129408	0.193782	0.846346	0.968351	301.679	1.13838	0.157943	7.20756	5.7e-13	1.03e-09	1.01753	2.20134	2.16341	1.11331
Rhot2	ENSMUSG00000025733	1962.81	-0.0120862	0.101522	-0.11905	0.905236	0.982338	266.394	1.03633	0.162462	6.37894	1.78e-10	2.82e-07	0.991657	2.05101	2.06826	1.04842
Lsm14b	ENSMUSG00000039108	1411.12	-0.114534	0.0834787	-1.37201	0.17006	0.611308	221.753	0.874438	0.160248	5.45677	4.85e-08	3.61e-05	0.923681	1.83329	1.98477	0.988972
Mlxipl	ENSMUSG00000005373	7509.66	-0.128942	0.126604	-1.01846	0.308458	0.743099	541.44	0.857391	0.155997	5.49619	3.88e-08	3.43e-05	0.914502	1.81176	1.98114	0.986333
Lrrc10b	ENSMUSG00000090291	2007.57	-0.37028	0.109095	-3.3941	0.000688536	0.029218	180.659	0.60531	0.169874	3.56329	0.000366233	0.0555571	0.773632	1.52131	1.96645	0.97559
Trabd	ENSMUSG00000015363	3643.21	-0.205911	0.112468	-1.83084	0.0671243	0.416339	360.701	0.762589	0.159006	4.79598	1.62e-06	0.000682122	0.866991	1.69653	1.95681	0.9685
Ceacam1	ENSMUSG00000074272	2226.34	-0.59837	0.13778	-4.34294	1.41e-05	0.0018622	203.818	0.360731	0.16661	2.16511	0.0303789	0.607634	0.6605	1.28408	1.9441	0.9591
Cpne5	ENSMUSG00000024008	76.0822	-0.526086	0.144625	-3.63758	0.000275216	0.01582	22.9817	0.42758	0.198489	2.15417	0.0312267	0.612522	0.694436	1.34498	1.93679	0.953666
Abtb1	ENSMUSG00000030083	614.633	-0.296572	0.130425	-2.27388	0.022973	0.241605	215.772	0.655865	0.170635	3.84367	0.000121206	0.0250427	0.814185	1.57556	1.93514	0.952437
Nectin2	ENSMUSG00000062300	649.495	-0.284425	0.103289	-2.75368	0.00589291	0.114003	121.446	0.652921	0.180838	3.61053	0.00030557	0.0495219	0.821069	1.57235	1.915	0.937346
Gm10125	ENSMUSG00000063087	40.6604	-0.11234	0.14387	-0.780848	0.434892	0.81783	28.5213	0.802883	0.21248	3.77863	0.000157696	0.0302035	0.925086	1.74458	1.88586	0.915223
Pex11g	ENSMUSG00000069633	208.786	-0.403332	0.131491	-3.06738	0.00215947	0.0601367	64.1572	0.504656	0.21378	2.36063	0.0182438	0.486294	0.75611	1.41878	1.87643	0.907987
Dusp23	ENSMUSG00000026544	455.987	-0.508205	0.127811	-3.97622	7e-05	0.00632385	48.1949	0.39892	0.21373	1.86646	0.0619764	0.767757	0.703097	1.31852	1.8753	0.907125
Kcnc2	ENSMUSG00000035681	100.42	-0.736875	0.125752	-5.85973	4.64e-09	4.77e-06	8.71518	0.161319	0.177519	0.908742	0.363486	0.999277	0.600038	1.11831	1.86373	0.898193
Guk1	ENSMUSG00000020444	2915.68	0.064083	0.119922	0.534372	0.593084	0.895885	164.917	0.959309	0.174816	5.48754	4.08e-08	3.43e-05	1.04542	1.94438	1.8599	0.895226
Mfge8	ENSMUSG00000030605	868.118	-0.489184	0.132135	-3.70217	0.000213765	0.0132902	40.8579	0.400549	0.215192	1.86136	0.0626934	0.771083	0.712428	1.32001	1.85283	0.889733
Rnf113a2	ENSMUSG00000098134	712.032	0.122093	0.0743314	1.64254	0.100477	0.493641	61.7426	0.998472	0.207605	4.80949	1.51e-06	0.000659587	1.08831	1.99788	1.83576	0.87638
Stc1	ENSMUSG00000014813	857.925	-0.34842	0.13283	-2.62304	0.00871478	0.141566	79.4893	0.525872	0.206936	2.54123	0.0110463	0.405918	0.785444	1.4398	1.83311	0.874292
Src	ENSMUSG00000027646	154.254	-0.489466	0.128981	-3.79486	0.000147728	0.0107906	21.8228	0.361725	0.212424	1.70285	0.0885968	0.851686	0.712289	1.28496	1.80399	0.851191
Nrm	ENSMUSG00000059791	1180.61	-0.569388	0.089854	-6.33681	2.35e-10	3.92e-07	175.665	0.27944	0.188611	1.48157	0.138454	0.963238	0.673903	1.21372	1.80104	0.848828
Pgap3	ENSMUSG00000038208	641.044	-0.518174	0.103958	-4.98443	6.21e-07	0.000207669	115.63	0.330455	0.183091	1.80487	0.0710943	0.802413	0.698255	1.25741	1.80079	0.84863
Coch	ENSMUSG00000020953	1298.63	0.0385449	0.145777	0.264409	0.791465	0.954487	116.21	0.886763	0.202943	4.36952	1.25e-05	0.00383913	1.02708	1.84902	1.80028	0.848218
Rabl6	ENSMUSG00000015087	4350.83	-0.166201	0.0815611	-2.03774	0.0415757	0.330996	332.752	0.670257	0.144792	4.62911	3.67e-06	0.00136541	0.891187	1.59136	1.78566	0.836457
Apoo	ENSMUSG00000079508	1998.54	0.0828571	0.0705835	1.17389	0.24044	0.68851	130.491	0.915373	0.209434	4.37071	1.24e-05	0.00383913	1.05911	1.88606	1.78079	0.832516
Cyth1	ENSMUSG00000017132	2151.23	-0.0885815	0.0555045	-1.59593	0.110504	0.514156	361.208	0.729388	0.151319	4.8202	1.43e-06	0.000647453	0.940447	1.65794	1.76292	0.817969
Gm17167	ENSMUSG00000091542	42.8163	-0.25082	0.14266	-1.75817	0.0787192	0.445187	33.289	0.563425	0.210246	2.67984	0.0073657	0.364449	0.840419	1.47777	1.75838	0.814245
Cd34	ENSMUSG00000016494	79.9297	-0.387485	0.142992	-2.70983	0.00673172	0.123494	24.7371	0.422641	0.204022	2.07155	0.0383074	0.661945	0.764461	1.34038	1.75336	0.810126
Cbx7	ENSMUSG00000053411	945.55	-0.292108	0.10886	-2.68333	0.00728929	0.129569	109.191	0.517494	0.198782	2.60333	0.00923237	0.378917	0.816708	1.43147	1.75273	0.809602
Brms1	ENSMUSG00000080268	812.47	-0.275778	0.0992882	-2.77755	0.00547699	0.110092	46.1997	0.531753	0.212912	2.49753	0.0125063	0.42787	0.826005	1.44568	1.75021	0.807531
Grk4	ENSMUSG00000052783	112.13	-0.128946	0.145122	-0.888535	0.374253	0.787458	83.4616	0.675332	0.216305	3.12212	0.00179551	0.175435	0.914499	1.59696	1.74627	0.804279
Rnf44	ENSMUSG00000034928	2413.09	-0.235706	0.117032	-2.01403	0.0440063	0.337833	424.174	0.563907	0.146835	3.84042	0.000122826	0.0250427	0.849269	1.47827	1.74063	0.799613
Pstpip2	ENSMUSG00000025429	299.435	-0.532651	0.124053	-4.29374	1.76e-05	0.00219478	29.4191	0.266207	0.216607	1.22899	0.219076	0.999277	0.691283	1.20264	1.73972	0.798858
Syvn1	ENSMUSG00000024807	3666.16	-0.174279	0.0924179	-1.88577	0.0593253	0.392679	1247.67	0.622736	0.110885	5.61608	1.95e-08	2.06e-05	0.88621	1.53979	1.7375	0.797015
Agtrap	ENSMUSG00000029007	312.356	-0.167259	0.119347	-1.40145	0.161078	0.600594	37.3407	0.629418	0.21591	2.91519	0.00355471	0.258248	0.890533	1.54694	1.7371	0.796677
Fam83h	ENSMUSG00000046761	1005.81	-0.439261	0.0970087	-4.52806	5.95e-06	0.00112071	211.508	0.353373	0.157073	2.24974	0.0244656	0.542579	0.737512	1.27754	1.73223	0.792634
Them6	ENSMUSG00000056665	565.175	-0.623939	0.136567	-4.56874	4.91e-06	0.000978921	111.797	0.16781	0.186455	0.900002	0.368119	0.999277	0.648897	1.12335	1.73117	0.791749
Nudt16	ENSMUSG00000032565	315.181	-0.236694	0.103018	-2.2976	0.0215844	0.233807	52.892	0.552739	0.216594	2.55196	0.010712	0.40181	0.848688	1.46687	1.7284	0.789433
Vipr1	ENSMUSG00000032528	2759.23	-0.163396	0.1001	-1.63233	0.102611	0.499227	892.919	0.624083	0.127044	4.91233	9e-07	0.000455078	0.892921	1.54123	1.72606	0.787479
Lypla2	ENSMUSG00000028670	3585.18	-0.194834	0.0815761	-2.38837	0.0169231	0.203528	235.523	0.585902	0.157433	3.72159	0.000197971	0.0368023	0.873673	1.50098	1.71801	0.780736
Gm43960	ENSMUSG00000108249	48.4869	0.0499639	0.140476	0.355675	0.722084	0.937571	118.879	0.821691	0.216864	3.78898	0.000151268	0.0294181	1.03524	1.76748	1.70731	0.771728
G6pc3	ENSMUSG00000034793	1689.48	-0.152248	0.0957344	-1.59032	0.111762	0.516979	114.023	0.615548	0.186156	3.30663	0.000944262	0.11368	0.899847	1.53214	1.70267	0.767797
Dis3l2	ENSMUSG00000053333	611.787	-0.313045	0.083237	-3.76089	0.000169311	0.0116659	45.1755	0.451495	0.2137	2.11275	0.0346218	0.639558	0.804941	1.36746	1.69883	0.76454
Ccdc50	ENSMUSG00000038127	2370.87	-0.249605	0.0837597	-2.98001	0.0028824	0.0734358	208.147	0.514636	0.172014	2.99182	0.00277315	0.232565	0.841127	1.42863	1.69848	0.764241
Sirt6	ENSMUSG00000034748	516.314	-0.287021	0.0802348	-3.57727	0.000347202	0.0187139	28.7016	0.471304	0.217016	2.17175	0.0298748	0.60715	0.819592	1.38636	1.69153	0.758326
Dnajc14	ENSMUSG00000025354	2180.37	-0.262558	0.0598698	-4.38548	1.16e-05	0.00161569	141.72	0.488144	0.176686	2.76278	0.00573108	0.32943	0.833609	1.40264	1.68261	0.750702
Mlycd	ENSMUSG00000074064	867.873	-0.407152	0.0956435	-4.25698	2.07e-05	0.00249527	119.501	0.341884	0.184551	1.85252	0.0639516	0.774966	0.75411	1.26741	1.68067	0.749036
Gm45844	ENSMUSG00000110105	81.2966	-0.131958	0.131867	-1.00069	0.316977	0.750019	15.6603	0.613446	0.200245	3.06348	0.00218777	0.196139	0.912592	1.52991	1.67644	0.745404
Aftph	ENSMUSG00000049659	1885.46	-0.0655292	0.0651323	-1.00609	0.31437	0.7474	194.786	0.675074	0.171479	3.93677	8.26e-05	0.0179994	0.955595	1.59668	1.67087	0.740603
Dph7	ENSMUSG00000026975	500.409	-0.0873514	0.094281	-0.926501	0.354186	0.774327	55.582	0.651452	0.214531	3.03663	0.00239236	0.208965	0.941249	1.57075	1.66879	0.738803
Ptpn5	ENSMUSG00000030854	165.155	-0.503052	0.132921	-3.7846	0.000153958	0.0110668	14.3271	0.233617	0.203607	1.14739	0.251219	0.999277	0.705613	1.17578	1.66632	0.736669
Pgp	ENSMUSG00000043445	2761.2	0.0145258	0.111686	0.130059	0.896519	0.98034	182.21	0.750453	0.17148	4.37633	1.21e-05	0.00383913	1.01012	1.68232	1.66547	0.735927
Car8	ENSMUSG00000041261	192.281	-0.786531	0.11644	-6.75483	1.43e-11	3.82e-08	13.6784	-0.0514707	0.20402	-0.252283	0.800823	0.999277	0.579737	0.964952	1.66447	0.73506
AU040320	ENSMUSG00000028830	3121.37	-0.37839	0.0680783	-5.55816	2.73e-08	1.92e-05	406.587	0.349544	0.154646	2.26028	0.0238036	0.533496	0.769295	1.27416	1.65627	0.727934
Rpl35	ENSMUSG00000062997	5405.92	0.0840784	0.116129	0.72401	0.46906	0.839347	144.078	0.807234	0.182122	4.43238	9.32e-06	0.0031026	1.06001	1.74985	1.65079	0.723155
Ppp4r3a	ENSMUSG00000041846	2567.39	-0.073591	0.083659	-0.879655	0.379046	0.789454	363.838	0.645618	0.145665	4.43222	9.33e-06	0.0031026	0.95027	1.56441	1.64628	0.719209
Ptpn1	ENSMUSG00000027540	1584.31	-0.398679	0.0837025	-4.76305	1.91e-06	0.000463441	192.13	0.31926	0.177723	1.79639	0.0724325	0.804529	0.758552	1.24769	1.64483	0.71794
Sfi1	ENSMUSG00000023764	867.91	-0.0238242	0.089392	-0.266514	0.789843	0.954487	126.835	0.691648	0.215603	3.20796	0.00133678	0.145674	0.983622	1.61513	1.64202	0.715472
P2ry6	ENSMUSG00000048779	1576.11	-0.54187	0.0742843	-7.29454	3e-13	2e-09	133.303	0.172874	0.18101	0.955053	0.339551	0.999277	0.68688	1.1273	1.64119	0.714743
Impdh1	ENSMUSG00000003500	3453.75	-0.34989	0.0837314	-4.17872	2.93e-05	0.00323852	329.436	0.362675	0.139278	2.60397	0.00921519	0.378917	0.784644	1.28581	1.63871	0.712565
St14	ENSMUSG00000031995	196.264	-0.302443	0.104289	-2.90006	0.00373096	0.0874943	42.866	0.407979	0.215871	1.88992	0.0587682	0.752489	0.810878	1.32683	1.63628	0.710422
Rps6-ps4	ENSMUSG00000081406	4596.72	0.0302955	0.119643	0.253217	0.800101	0.956574	96.4177	0.737812	0.213649	3.45338	0.000553609	0.0777575	1.02122	1.66764	1.63299	0.707516
Qsox2	ENSMUSG00000036327	2577.7	-0.266202	0.0775182	-3.43406	0.000594608	0.0264938	463.424	0.440825	0.130228	3.38502	0.000711741	0.095714	0.831506	1.35738	1.63244	0.707028
Gm38025	ENSMUSG00000103998	277.896	-0.0637883	0.112943	-0.564785	0.57222	0.889935	56.5192	0.642044	0.216885	2.9603	0.0030734	0.242818	0.956749	1.56054	1.63109	0.705833
Acads	ENSMUSG00000029545	782.522	-0.28036	0.113769	-2.46429	0.0137284	0.183043	143.984	0.424035	0.171737	2.46909	0.0135455	0.441312	0.823386	1.34168	1.62946	0.704395
D130040H23Rik	ENSMUSG00000079038	142.449	-0.271725	0.125728	-2.16122	0.0306786	0.280493	42.8381	0.431328	0.211891	2.03561	0.0417893	0.672512	0.828328	1.34847	1.62795	0.703054
Gm47102	ENSMUSG00000111824	145.883	-0.256319	0.145289	-1.76421	0.0776972	0.441948	160.84	0.445136	0.178145	2.49873	0.0124641	0.42787	0.837221	1.36144	1.62614	0.701455
Tlnrd1	ENSMUSG00000070462	1022.71	-0.306341	0.107597	-2.8471	0.00441193	0.0973172	173.322	0.394933	0.174616	2.26172	0.0237145	0.533496	0.80869	1.31488	1.62594	0.701274
Creld1	ENSMUSG00000030284	1544.37	-0.255398	0.104467	-2.44477	0.0144943	0.188652	112.067	0.443286	0.191342	2.31672	0.0205188	0.516689	0.837756	1.3597	1.62302	0.698685
Sox12	ENSMUSG00000051817	325.229	-0.646605	0.113423	-5.70085	1.19e-08	9.37e-06	27.0645	0.0513959	0.216783	0.237085	0.812591	0.999277	0.638782	1.03627	1.62226	0.698001
Anp32a	ENSMUSG00000032249	3819.1	-0.054067	0.109083	-0.495652	0.62014	0.907694	267.219	0.640982	0.150193	4.26773	1.97e-05	0.00554723	0.963217	1.55939	1.61894	0.695049
Entpd3	ENSMUSG00000041608	10049.1	-0.147728	0.106331	-1.38932	0.164734	0.603971	986.385	0.541906	0.156835	3.45526	0.000549767	0.0777575	0.902671	1.45589	1.61287	0.689634
Lfng	ENSMUSG00000029570	219.723	-0.383322	0.129187	-2.96719	0.00300531	0.0753695	134.174	0.306247	0.178243	1.71814	0.0857708	0.84456	0.76667	1.23649	1.6128	0.689568
6030458C11Rik	ENSMUSG00000022195	1004.29	-0.38906	0.0745525	-5.2186	1.8e-07	8.61e-05	272.022	0.295827	0.147285	2.00854	0.0445864	0.684001	0.763627	1.22759	1.60758	0.684886
Klc2	ENSMUSG00000024862	2320.31	-0.147501	0.0956487	-1.54212	0.123045	0.535747	227.367	0.535634	0.161093	3.325	0.000884201	0.10958	0.902813	1.44958	1.60563	0.683136
Igfbp7	ENSMUSG00000036256	378.904	-0.598484	0.139342	-4.29507	1.75e-05	0.00219478	19.3361	0.0829128	0.210193	0.394461	0.693241	0.999277	0.660448	1.05915	1.60369	0.681397
Ppt2	ENSMUSG00000015474	1150.6	-0.534682	0.103136	-5.18422	2.17e-07	9.35e-05	811.795	0.145791	0.135689	1.07445	0.28262	0.999277	0.690311	1.10634	1.60267	0.680473
Zfp111	ENSMUSG00000087598	570.903	-0.0612068	0.0852301	-0.718136	0.472674	0.841589	127.056	0.617563	0.186146	3.31762	0.000907865	0.110868	0.958462	1.53428	1.60077	0.67877
Phldb2	ENSMUSG00000033149	40.5369	-0.217144	0.125251	-1.73367	0.0829767	0.454942	9.14782	0.461261	0.175855	2.62296	0.00871693	0.375106	0.860267	1.37674	1.60037	0.678405
4933421O10Rik	ENSMUSG00000085037	388.296	-0.290173	0.0874462	-3.3183	0.000905658	0.0350128	28.631	0.38594	0.21331	1.80929	0.0704056	0.799638	0.817804	1.30671	1.59783	0.676113
Rtn2	ENSMUSG00000030401	3316.85	-0.0494239	0.0924837	-0.534406	0.593061	0.895885	153.592	0.626214	0.16869	3.71222	0.000205449	0.0372478	0.966322	1.54351	1.5973	0.675638
Slc37a1	ENSMUSG00000024036	1126.23	-0.51023	0.0810205	-6.29754	3.02e-10	4.49e-07	91.1522	0.163996	0.194866	0.841586	0.40002	0.999277	0.702111	1.12039	1.59574	0.674226
Dedd2	ENSMUSG00000054499	630.357	-0.153487	0.128549	-1.19399	0.23248	0.682081	163.323	0.51696	0.180966	2.85667	0.00428112	0.286337	0.899075	1.43094	1.59157	0.670446
Lactb	ENSMUSG00000032370	350.052	-0.412407	0.120608	-3.41939	0.000627615	0.0273268	53.5266	0.257045	0.212046	1.21221	0.225431	0.999277	0.751369	1.19503	1.59047	0.669453
Dgcr8	ENSMUSG00000022718	897.081	-0.12451	0.0917959	-1.35637	0.17498	0.617685	65.2209	0.544674	0.207432	2.6258	0.00864452	0.375106	0.917316	1.45869	1.59017	0.669184
Dgcr8	ENSMUSG00000106687	897.081	-0.12451	0.0917959	-1.35637	0.17498	0.617685	65.2302	0.544552	0.207424	2.62531	0.00865703	0.375106	0.917316	1.45857	1.59004	0.669062
Gm42785	ENSMUSG00000106948	196.739	-0.149378	0.109034	-1.37001	0.170685	0.612136	423.988	0.518694	0.198919	2.60756	0.009119	0.378917	0.901639	1.43266	1.58895	0.668072
Gm28756	ENSMUSG00000109887	57.6664	-0.0664849	0.139912	-0.475192	0.63465	0.912468	55.6986	0.599744	0.211391	2.83713	0.00455211	0.302859	0.954962	1.51545	1.58692	0.666229
Gm21244	ENSMUSG00000094484	80.4834	-0.125432	0.131528	-0.953658	0.340257	0.763413	29.1573	0.540761	0.21017	2.57296	0.0100832	0.390227	0.916729	1.45474	1.58688	0.666193
Gm15097	ENSMUSG00000094378	124.4	-0.0477841	0.141269	-0.33825	0.735175	0.938791	21.7859	0.617861	0.211223	2.92516	0.00344284	0.25752	0.967421	1.5346	1.58628	0.665645
4933411E06Rik	ENSMUSG00000099608	42.382	-0.191101	0.141507	-1.35047	0.176864	0.619699	32.899	0.473584	0.202954	2.33346	0.0196241	0.502163	0.875937	1.38855	1.58522	0.664685
Mtus1	ENSMUSG00000045636	558.909	-0.331909	0.106067	-3.12924	0.00175258	0.0522031	66.0534	0.331992	0.208215	1.59447	0.110831	0.91748	0.794484	1.25875	1.58436	0.663902
Ppp6r1	ENSMUSG00000052296	6197.12	0.0151912	0.065324	0.232552	0.816109	0.959702	494.529	0.678783	0.142967	4.74784	2.06e-06	0.000838405	1.01059	1.60079	1.58402	0.663591
Fen1	ENSMUSG00000024742	5485.55	-0.14282	0.0922359	-1.54842	0.121522	0.534218	260.981	0.519837	0.149202	3.48412	0.000493764	0.0717434	0.905747	1.43379	1.58299	0.662656
Gm44578	ENSMUSG00000108857	50.2652	-0.0160875	0.145532	-0.110542	0.911979	0.983954	81.6263	0.645216	0.214937	3.00188	0.00268317	0.229176	0.988911	1.56397	1.58151	0.661304
Gcnt1	ENSMUSG00000038843	1811.94	-0.323747	0.100891	-3.20888	0.00133254	0.0435502	274.511	0.337382	0.144492	2.33495	0.019546	0.501178	0.798992	1.26346	1.58132	0.661129
Pop5	ENSMUSG00000060152	2610.54	-0.206374	0.118076	-1.7478	0.080498	0.44834	237.66	0.454463	0.153837	2.95419	0.0031349	0.243118	0.866713	1.37027	1.581	0.660837
Gm5860	ENSMUSG00000085022	185.016	-0.304793	0.137606	-2.21496	0.0267627	0.261695	14.7064	0.353959	0.202225	1.75032	0.0800627	0.82821	0.809559	1.27806	1.57872	0.658752
Gm43498	ENSMUSG00000106819	41.9599	0.0066147	0.144516	0.0457715	0.963492	0.994289	69.8965	0.66433	0.213996	3.1044	0.00190664	0.18259	1.0046	1.58483	1.57758	0.657716
Ap1s3	ENSMUSG00000054702	770.213	-0.109509	0.0975329	-1.12279	0.261527	0.705232	170.095	0.54774	0.212774	2.57429	0.0100447	0.390227	0.926904	1.46179	1.57707	0.657249
Cdh22	ENSMUSG00000053166	2555.43	-0.306957	0.123993	-2.47561	0.013301	0.180136	157.504	0.349192	0.170248	2.05107	0.0402601	0.666004	0.808345	1.27385	1.57587	0.656148
Rce1	ENSMUSG00000024889	1145.5	-0.306101	0.104143	-2.93924	0.00329017	0.0806208	130.614	0.350005	0.176431	1.98381	0.0472771	0.690038	0.808825	1.27457	1.57582	0.656106
Gm45159	ENSMUSG00000109125	36.6257	-0.110715	0.143075	-0.773823	0.439036	0.820234	51.1443	0.545387	0.212846	2.56235	0.0103966	0.398254	0.926129	1.45941	1.57582	0.656102
Klhl21	ENSMUSG00000073700	885.536	-0.270498	0.125857	-2.14925	0.0316144	0.285727	93.0844	0.385522	0.194829	1.97877	0.0478421	0.692543	0.829034	1.30633	1.57573	0.65602
Atg4d	ENSMUSG00000002820	1710.94	-0.246003	0.13241	-1.85789	0.0631845	0.404949	114.842	0.409831	0.190216	2.15456	0.0311965	0.612522	0.843229	1.32853	1.57553	0.655834
Fgfr1	ENSMUSG00000031565	229.273	-0.421264	0.112433	-3.7468	0.000179101	0.0120789	36.7528	0.232989	0.216849	1.07443	0.28263	0.999277	0.74677	1.17527	1.5738	0.654252
Zfp488	ENSMUSG00000044519	194.494	-0.114609	0.109198	-1.04955	0.293925	0.733714	89.0023	0.539584	0.216838	2.48842	0.0128313	0.428018	0.923633	1.45355	1.57374	0.654193
Olfr1116	ENSMUSG00000070855	48.0745	-0.0268282	0.142055	-0.188858	0.850204	0.969418	67.9918	0.626146	0.214462	2.91961	0.00350472	0.257636	0.981576	1.54344	1.57241	0.652974
Neurl3	ENSMUSG00000047180	440.819	-0.53252	0.131777	-4.04108	5.32e-05	0.00510994	16.4686	0.118757	0.196868	0.603231	0.546355	0.999277	0.691346	1.0858	1.57056	0.651277
Ccdc162	ENSMUSG00000075225	200.499	-0.202212	0.123952	-1.63137	0.102813	0.499383	18.7593	0.448387	0.203255	2.20603	0.0273817	0.582472	0.869217	1.36451	1.56982	0.650599
Rabl2	ENSMUSG00000022621	388.829	-0.285637	0.100481	-2.84271	0.00447324	0.0978677	29.8249	0.363876	0.217004	1.67682	0.093578	0.877776	0.820379	1.28688	1.56864	0.649513
Stk11ip	ENSMUSG00000026213	1118.41	-0.320857	0.0737996	-4.34767	1.38e-05	0.00185774	106.945	0.32807	0.200471	1.6365	0.101736	0.899753	0.800594	1.25533	1.568	0.648927
Mrpl53	ENSMUSG00000030037	1371.18	-0.0270349	0.111229	-0.243057	0.807961	0.958353	110.674	0.621164	0.185484	3.34888	0.000811397	0.104662	0.981435	1.53812	1.56721	0.648199
C1qtnf1	ENSMUSG00000017446	252.595	-0.455237	0.13064	-3.48468	0.000492719	0.0236064	47.2695	0.192771	0.214134	0.900232	0.367997	0.999277	0.72939	1.14296	1.567	0.648008
Frem2	ENSMUSG00000037016	88.124	-0.435493	0.138296	-3.14899	0.00163833	0.0502285	11.9496	0.212499	0.190872	1.1133	0.265578	0.999277	0.739441	1.15869	1.56699	0.647992
Ecd	ENSMUSG00000021810	2548.34	-0.219426	0.0851462	-2.57705	0.00996465	0.152925	129.829	0.428514	0.182508	2.34792	0.0188785	0.490098	0.858907	1.34585	1.56693	0.64794
Zfp385a	ENSMUSG00000000552	318.145	-0.44467	0.116158	-3.82813	0.000129119	0.009751	35.8031	0.201527	0.216899	0.929128	0.352823	0.999277	0.734752	1.14991	1.56504	0.646197
Vps29	ENSMUSG00000029462	3181.02	0.14594	0.0946162	1.54245	0.122965	0.535747	200.2	0.790881	0.163291	4.84337	1.28e-06	0.000597658	1.10645	1.73013	1.56368	0.644941
Ano3	ENSMUSG00000074968	72.7656	-0.57059	0.145882	-3.91131	9.18e-05	0.00765535	10.4597	0.07419	0.185013	0.400999	0.688421	0.999277	0.673342	1.05277	1.5635	0.64478
Spata6	ENSMUSG00000034401	538.956	-0.0617686	0.0982346	-0.628786	0.529489	0.869494	47.5114	0.57958	0.213776	2.71116	0.00670489	0.357623	0.958089	1.49441	1.55979	0.641348
Olfr338	ENSMUSG00000068950	60.0231	-0.20718	0.136732	-1.51523	0.129715	0.549048	26.348	0.433361	0.199042	2.17723	0.0294633	0.602663	0.866229	1.35038	1.55891	0.64054
Efcab14	ENSMUSG00000034210	2125.52	-0.172922	0.0818048	-2.11384	0.034529	0.30086	231.952	0.467272	0.174255	2.68155	0.0073282	0.364449	0.887044	1.38249	1.55854	0.640194
Klf16	ENSMUSG00000035397	827.302	-0.212992	0.0825217	-2.58105	0.00985007	0.151864	82.2693	0.427168	0.195277	2.1875	0.0287061	0.593902	0.862746	1.34459	1.5585	0.640161
Znhit1	ENSMUSG00000059518	1720.33	-0.060889	0.105097	-0.579358	0.562347	0.885011	53.5556	0.577376	0.212117	2.72198	0.00648926	0.352599	0.958673	1.49213	1.55646	0.638265
Gm48443	ENSMUSG00000111485	872.126	-0.192652	0.103566	-1.86019	0.0628585	0.404145	579.854	0.444761	0.196771	2.2603	0.0238025	0.533496	0.874996	1.36109	1.55554	0.637413
Churc1	ENSMUSG00000090258	1785.53	-0.00974874	0.110033	-0.0885983	0.929401	0.985827	75.243	0.627487	0.210191	2.98531	0.00283287	0.234055	0.993265	1.54487	1.55535	0.637236
Cep19	ENSMUSG00000035790	806.133	-0.153723	0.0975182	-1.57635	0.114945	0.522571	51.2863	0.482159	0.211754	2.27698	0.0227874	0.533496	0.898928	1.39683	1.55389	0.635881
9930111J21Rik2	ENSMUSG00000069892	50.2068	-0.129029	0.143654	-0.898194	0.369082	0.784717	121.024	0.506673	0.192245	2.63556	0.00839982	0.375106	0.914447	1.42077	1.55369	0.635702
Cnot6	ENSMUSG00000020362	3534.84	-0.268156	0.106339	-2.5217	0.0116789	0.167682	1206.05	0.366609	0.114057	3.21425	0.00130784	0.14376	0.83038	1.28932	1.55268	0.634765
Pgpep1	ENSMUSG00000056204	696.984	-0.161936	0.117837	-1.37423	0.169369	0.610039	133.79	0.468694	0.180703	2.59372	0.00949435	0.384673	0.893825	1.38386	1.54824	0.63063
Npc1	ENSMUSG00000024413	1042.09	-0.374479	0.0796369	-4.70233	2.57e-06	0.000563629	163.832	0.254611	0.175432	1.45133	0.146687	0.977404	0.771384	1.19301	1.54659	0.62909
Hdac5	ENSMUSG00000008855	1333.13	-0.305539	0.11829	-2.58297	0.00979534	0.151369	55.4957	0.321477	0.209959	1.53114	0.125734	0.942444	0.80914	1.24961	1.54437	0.627016
Ctbp1	ENSMUSG00000037373	8497.63	-0.23845	0.0589777	-4.04305	5.28e-05	0.00510994	293.5	0.38209	0.153997	2.48115	0.0130958	0.430481	0.847656	1.30323	1.53745	0.620539
Olfr365	ENSMUSG00000059429	106.292	-0.030238	0.114348	-0.264439	0.791442	0.954487	89.0484	0.589662	0.21681	2.71972	0.00653377	0.352963	0.979259	1.50489	1.53677	0.6199
Cchcr1	ENSMUSG00000040312	1415.75	-0.0275298	0.076635	-0.359233	0.719421	0.936367	94.1263	0.591347	0.213029	2.7759	0.00550498	0.328151	0.981099	1.50665	1.53568	0.618876
Olfr552	ENSMUSG00000073973	36.6037	-0.0488436	0.145978	-0.334595	0.737931	0.939958	40.6002	0.570024	0.208349	2.73591	0.00622085	0.344903	0.966711	1.48455	1.53567	0.618867
Sp110	ENSMUSG00000070034	125.575	-0.199365	0.144813	-1.37671	0.168603	0.609113	24.9683	0.419133	0.199758	2.0982	0.0358875	0.648078	0.870934	1.33712	1.53528	0.618498
Lingo1	ENSMUSG00000049556	3223.82	-0.230775	0.110615	-2.08628	0.0369531	0.312233	377.356	0.387374	0.161678	2.39596	0.0165768	0.474446	0.852177	1.30801	1.5349	0.618148
Ppp6r3	ENSMUSG00000024908	4185.16	-0.0904114	0.0667075	-1.35534	0.175309	0.617729	651.403	0.524447	0.135691	3.86501	0.000111085	0.0234037	0.939255	1.43838	1.53141	0.614858
Wdr25	ENSMUSG00000040877	544.364	-0.152354	0.100759	-1.51206	0.130519	0.550711	64.1204	0.461582	0.204101	2.26154	0.0237259	0.533496	0.899781	1.37705	1.53043	0.613936
Prpf18	ENSMUSG00000039449	1456.4	-0.141012	0.0684903	-2.05885	0.0395081	0.322212	98.2241	0.470792	0.19113	2.4632	0.0137703	0.442926	0.906883	1.38587	1.52817	0.611803
2810039B14Rik	ENSMUSG00000099034	161.773	-0.199666	0.121792	-1.63939	0.101131	0.495899	21.2064	0.411798	0.210824	1.95328	0.0507863	0.70821	0.870752	1.33034	1.52781	0.611464
Rab17	ENSMUSG00000026304	218.798	-0.478031	0.118382	-4.03803	5.39e-05	0.00510994	9.05095	0.133381	0.187473	0.711472	0.476792	0.999277	0.717957	1.09686	1.52775	0.611412
Mob2	ENSMUSG00000025147	820.512	-0.170417	0.0900699	-1.89206	0.0584833	0.390694	103.143	0.43849	0.185806	2.35994	0.018278	0.486294	0.888586	1.35518	1.5251	0.608907
1700082M22Rik	ENSMUSG00000023737	43.4288	-0.194107	0.14381	-1.34975	0.177097	0.619699	55.0796	0.414779	0.213205	1.94544	0.0517215	0.716898	0.874114	1.33309	1.52508	0.608886
Cadm1	ENSMUSG00000032076	5016.39	-0.197417	0.103604	-1.9055	0.0567151	0.384967	505.777	0.41142	0.154822	2.65738	0.0078751	0.366435	0.872111	1.32999	1.52503	0.608837
Triap1	ENSMUSG00000029535	829.147	-0.114825	0.0972564	-1.18064	0.237744	0.686674	104.287	0.493477	0.189899	2.59862	0.00935985	0.381671	0.923494	1.40783	1.52446	0.608302
Olfr1328	ENSMUSG00000111259	170.683	-0.127796	0.116293	-1.09891	0.271805	0.714919	17.9329	0.479313	0.180238	2.65933	0.00782955	0.366435	0.915229	1.39408	1.5232	0.607109
Gm4117	ENSMUSG00000089940	288.293	-0.188214	0.136687	-1.37697	0.168521	0.609005	276.367	0.41874	0.19757	2.11944	0.0340529	0.639431	0.877692	1.33676	1.52304	0.606954
Nmnat1	ENSMUSG00000028992	260.124	-0.231814	0.125258	-1.85069	0.0642149	0.408436	19.8451	0.374773	0.212438	1.76415	0.0777062	0.819387	0.851564	1.29664	1.52265	0.606586
Gm43577	ENSMUSG00000105287	63.9967	-0.0891321	0.138147	-0.645195	0.518801	0.864474	64.632	0.517426	0.213853	2.41954	0.0155403	0.465067	0.940088	1.4314	1.52262	0.606558
Gm42927	ENSMUSG00000105207	586.179	-0.0416771	0.128127	-0.32528	0.744969	0.941278	942.174	0.564652	0.203227	2.77843	0.00546228	0.328059	0.971525	1.47903	1.52238	0.606329
Zfp697	ENSMUSG00000050064	94.1743	-0.170871	0.121384	-1.40769	0.159223	0.596842	52.8918	0.432678	0.217009	1.99383	0.0461709	0.689171	0.888306	1.34974	1.51945	0.603549
Bmf	ENSMUSG00000040093	254.791	-0.682577	0.135788	-5.02677	4.99e-07	0.000180202	78.045	-0.0793492	0.211544	-0.375096	0.707589	0.999277	0.623051	0.946485	1.51911	0.603228
Gm45038	ENSMUSG00000109195	89.0998	-0.104328	0.122003	-0.855129	0.39248	0.795486	194.833	0.497921	0.194594	2.55876	0.0105045	0.400596	0.930238	1.41218	1.51808	0.602249
C130073E24Rik	ENSMUSG00000110246	56.6674	-0.029992	0.138965	-0.215825	0.829124	0.963218	47.4019	0.572033	0.211544	2.70409	0.00684913	0.359805	0.979426	1.48662	1.51785	0.602025
E130309D02Rik	ENSMUSG00000039244	1199.87	-0.11457	0.10437	-1.09772	0.272325	0.715515	129.411	0.485366	0.18258	2.65837	0.00785206	0.366435	0.923658	1.39994	1.51565	0.599935
Coro2a	ENSMUSG00000028337	420.015	-0.607188	0.124563	-4.87453	1.09e-06	0.000297537	98.8678	-0.00915794	0.189259	-0.0483884	0.961407	0.999277	0.656475	0.993672	1.51365	0.59803
Mdga1	ENSMUSG00000043557	148.646	-0.333368	0.137379	-2.42662	0.0152401	0.19346	18.3725	0.264036	0.200087	1.31961	0.186967	0.999277	0.793681	1.20083	1.51299	0.597404
Mogs	ENSMUSG00000030036	3034.84	-0.373575	0.118598	-3.14992	0.00163316	0.050185	411.617	0.222744	0.131474	1.6942	0.0902267	0.856916	0.771867	1.16695	1.51185	0.596319
4632415L05Rik	ENSMUSG00000048106	496.602	-0.17492	0.0951284	-1.83878	0.0659476	0.413509	38.3098	0.420968	0.215985	1.94906	0.0512882	0.713238	0.885817	1.33883	1.5114	0.595888
Gm43190	ENSMUSG00000106107	62.6134	-0.0327832	0.141084	-0.232367	0.816253	0.959755	53.6322	0.562281	0.212488	2.64617	0.00814085	0.374838	0.977533	1.4766	1.51054	0.595064
Prdm11	ENSMUSG00000075028	121.196	-0.14102	0.118625	-1.18878	0.234525	0.68322	48.1588	0.453128	0.216993	2.08821	0.0367789	0.648426	0.906878	1.36901	1.50958	0.594148
Dhtkd1	ENSMUSG00000025815	88.0643	-0.0127722	0.131578	-0.0970692	0.922671	0.985705	24.9078	0.581055	0.212137	2.73905	0.00616164	0.344643	0.991186	1.49594	1.50925	0.593828
Vps4b	ENSMUSG00000009907	2551.48	-0.351381	0.112501	-3.12336	0.00178799	0.0527595	211.445	0.242241	0.178557	1.35666	0.174888	0.999277	0.783833	1.18283	1.50903	0.593622
Inpp4b	ENSMUSG00000037940	190.469	-0.360931	0.121818	-2.96288	0.00304776	0.0761793	33.3126	0.231996	0.214171	1.08323	0.278707	0.999277	0.778662	1.17446	1.5083	0.592927
Oraov1	ENSMUSG00000031072	676.496	-0.155505	0.0800134	-1.94348	0.0519577	0.369215	59.9952	0.437325	0.206084	2.12208	0.0338313	0.637349	0.897818	1.35409	1.5082	0.59283
Gm43660	ENSMUSG00000107352	71.0737	-0.125819	0.130942	-0.960881	0.336612	0.759804	15.661	0.466486	0.185489	2.51491	0.0119064	0.419245	0.916483	1.38174	1.50765	0.592306
Tcp11l2	ENSMUSG00000020034	181.572	-0.49137	0.137568	-3.57184	0.000354476	0.0189531	14.7087	0.100791	0.204627	0.49256	0.622323	0.999277	0.711349	1.07236	1.5075	0.592161
Olfr374	ENSMUSG00000046881	92.5186	-0.201542	0.133269	-1.51229	0.130459	0.550676	47.8212	0.389072	0.212688	1.8293	0.0673539	0.786127	0.86962	1.30955	1.50589	0.590614
Sned1	ENSMUSG00000047793	62.4199	-0.118316	0.145172	-0.815005	0.41507	0.807961	9.61548	0.47162	0.172657	2.73154	0.00630385	0.347978	0.921262	1.38667	1.50518	0.589936
Gm16892	ENSMUSG00000097876	57.1054	-0.0623038	0.145731	-0.427525	0.668997	0.925067	23.9252	0.526599	0.200156	2.63094	0.00851478	0.375106	0.957734	1.44053	1.5041	0.588903
Akap2	ENSMUSG00000038729	51.1939	-0.0435352	0.138769	-0.313724	0.753731	0.943904	15.9927	0.543709	0.190218	2.85835	0.00425857	0.286337	0.970274	1.45771	1.50237	0.587244
Kcnn2	ENSMUSG00000054477	89.1755	-0.446393	0.142814	-3.1257	0.00177382	0.0524573	9.64613	0.139594	0.186105	0.750082	0.453205	0.999277	0.733876	1.1016	1.50107	0.585987
Gm43540	ENSMUSG00000105549	213.842	-0.0963673	0.128182	-0.751799	0.452172	0.827254	288.276	0.482417	0.194465	2.48074	0.0131109	0.430481	0.935385	1.39708	1.49359	0.578784
Zfyve27	ENSMUSG00000018820	1919.98	-0.166098	0.0719186	-2.30953	0.0209142	0.229472	92.1889	0.412505	0.198144	2.08184	0.0373567	0.654053	0.89125	1.33099	1.4934	0.578603
Kcns3	ENSMUSG00000043673	154.858	-0.375545	0.145388	-2.58306	0.0097929	0.151369	12.4985	0.202621	0.201492	1.0056	0.314606	0.999277	0.770814	1.15079	1.49295	0.578166
Pcsk7	ENSMUSG00000035382	1262.63	-0.308309	0.0989598	-3.1155	0.00183634	0.0536308	119.812	0.269741	0.191421	1.40915	0.15879	0.999277	0.807588	1.20559	1.49283	0.57805
Plppr1	ENSMUSG00000063446	225.525	-0.489406	0.131303	-3.7273	0.000193542	0.0126817	24.8407	0.0871524	0.216517	0.40252	0.687302	0.999277	0.712318	1.06227	1.49129	0.576558
Riox2	ENSMUSG00000022724	998.486	0.0483159	0.079679	0.606381	0.544261	0.87522	79.5125	0.623795	0.196333	3.17723	0.00148687	0.157945	1.03406	1.54092	1.49017	0.57548
Scarb1	ENSMUSG00000037936	1628.98	-0.392622	0.0857298	-4.57976	4.65e-06	0.00095728	155.073	0.181664	0.170464	1.06571	0.286557	0.999277	0.761744	1.13419	1.48894	0.574287
Card10	ENSMUSG00000033170	294.927	-0.250286	0.141394	-1.77012	0.0767067	0.439587	21.3679	0.32181	0.212867	1.51179	0.130588	0.954087	0.84073	1.2499	1.48668	0.572096
Msl1	ENSMUSG00000052915	2543.06	-0.0468498	0.0628127	-0.745864	0.455749	0.829671	476.165	0.525174	0.126604	4.14816	3.35e-05	0.00864645	0.968048	1.43911	1.48661	0.572024
Olfr204	ENSMUSG00000095928	54.6213	-0.04501	0.134164	-0.335485	0.737259	0.939837	43.6599	0.526514	0.20847	2.52561	0.0115497	0.411141	0.969283	1.44044	1.48609	0.571524
Itga4	ENSMUSG00000027009	284.217	-0.181518	0.13442	-1.35039	0.176892	0.619699	60.1003	0.389471	0.213923	1.82062	0.0686652	0.789424	0.881774	1.30991	1.48554	0.57099
Edem2	ENSMUSG00000038312	2730.05	-0.19323	0.082557	-2.34057	0.0192544	0.218471	412.475	0.376577	0.131663	2.86016	0.00423423	0.286337	0.874645	1.29826	1.48432	0.569807
Smdt1	ENSMUSG00000022452	3972.81	0.169895	0.117444	1.44661	0.148007	0.580178	173.939	0.738608	0.175857	4.20004	2.67e-05	0.0073337	1.12498	1.66857	1.4832	0.568713
Rnf170	ENSMUSG00000013878	823.793	-0.20859	0.091546	-2.27852	0.0226954	0.240111	65.9544	0.360122	0.206975	1.73993	0.0818705	0.833811	0.865383	1.28353	1.4832	0.568712
Hsd3b2	ENSMUSG00000063730	100.857	-0.0324438	0.127788	-0.253887	0.799583	0.956574	57.8978	0.536265	0.212372	2.52512	0.0115657	0.411141	0.977763	1.45021	1.4832	0.568709
Olfr975	ENSMUSG00000043331	41.8818	-0.133955	0.142474	-0.940209	0.34711	0.768692	22.6238	0.434496	0.204649	2.12312	0.0337435	0.637349	0.911329	1.35144	1.48293	0.568451
Vps37b	ENSMUSG00000066278	1415.99	-0.15709	0.0720901	-2.17908	0.0293258	0.274894	93.2871	0.410804	0.191375	2.14659	0.0318261	0.617045	0.896832	1.32943	1.48236	0.567894
Ppcdc	ENSMUSG00000063849	560.47	-0.123723	0.0899352	-1.37569	0.168917	0.609423	65.7739	0.444144	0.216403	2.05239	0.0401318	0.666004	0.917816	1.36051	1.48233	0.567867
Nhsl1	ENSMUSG00000039835	1187.04	-0.0959225	0.116871	-0.820756	0.411785	0.805081	157.304	0.471446	0.182732	2.57999	0.00988043	0.390227	0.935674	1.3865	1.48182	0.567368
Dffa	ENSMUSG00000028974	323.948	-0.196544	0.106958	-1.83757	0.0661255	0.413684	89.1823	0.370634	0.192819	1.92218	0.0545825	0.729459	0.872639	1.29292	1.48162	0.567178
Olfr1385	ENSMUSG00000059729	242.863	-0.119371	0.0932046	-1.28074	0.200285	0.647763	138.529	0.447001	0.193902	2.3053	0.0211499	0.520955	0.920589	1.3632	1.48079	0.566372
Zfp839	ENSMUSG00000021271	424.763	-0.165184	0.133537	-1.23699	0.21609	0.667088	54.2042	0.400781	0.209867	1.90969	0.0561729	0.740613	0.891815	1.32022	1.48038	0.565965
Depdc7	ENSMUSG00000027173	416.3	-0.300927	0.112662	-2.67106	0.00756116	0.13143	28.4109	0.264876	0.21642	1.2239	0.22099	0.999277	0.811731	1.20153	1.48021	0.565804
Panx1	ENSMUSG00000031934	135.54	-0.381904	0.136171	-2.80458	0.00503818	0.104089	21.0046	0.182819	0.204891	0.892271	0.372248	0.999277	0.767424	1.1351	1.4791	0.564723
Cartpt	ENSMUSG00000021647	247.49	-0.477769	0.132601	-3.60305	0.000314503	0.0175165	15.9108	0.0863596	0.203882	0.423576	0.671875	0.999277	0.718087	1.06169	1.47849	0.564129
Ehd3	ENSMUSG00000024065	291.901	-0.419987	0.0922813	-4.55115	5.34e-06	0.00104574	27.4189	0.1433	0.216772	0.66106	0.508574	0.999277	0.747432	1.10443	1.47763	0.563286
Homer2	ENSMUSG00000025813	107.516	-0.446735	0.139971	-3.19162	0.00141479	0.0451348	14.1428	0.114498	0.185998	0.615587	0.538167	0.999277	0.733701	1.0826	1.47553	0.561233
Pycr2	ENSMUSG00000026520	3304.16	-0.181903	0.0877536	-2.07289	0.0381829	0.317596	205.177	0.378254	0.15984	2.36645	0.0179596	0.483486	0.881539	1.29977	1.47443	0.560157
Ppp1r1a	ENSMUSG00000022490	14706.3	0.0949385	0.101572	0.934689	0.349949	0.771455	538.462	0.655012	0.157382	4.16192	3.16e-05	0.00831112	1.06802	1.57463	1.47434	0.560073
Ago4	ENSMUSG00000042500	111.902	-0.212886	0.133245	-1.59771	0.110109	0.513546	20.3007	0.34714	0.186251	1.86382	0.0623465	0.769615	0.862809	1.27204	1.4743	0.560026
Trim65	ENSMUSG00000054517	217.206	-0.377422	0.0963201	-3.91841	8.91e-05	0.00758885	47.5457	0.181075	0.213524	0.848033	0.39642	0.999277	0.769812	1.13373	1.47273	0.558498
Slc12a4	ENSMUSG00000017765	983.389	-0.162199	0.106634	-1.52108	0.12824	0.547437	39.069	0.395591	0.216803	1.82466	0.0680531	0.786955	0.893662	1.31548	1.47201	0.557789
Phf21b	ENSMUSG00000016624	2704.88	-0.385456	0.13675	-2.8187	0.00482187	0.10193	388.736	0.17206	0.145124	1.1856	0.235779	0.999277	0.765537	1.12667	1.47173	0.557516
Gm26641	ENSMUSG00000097045	129.578	-0.127563	0.137898	-0.92505	0.35494	0.774327	14.0813	0.427281	0.201717	2.11822	0.0341566	0.639558	0.915377	1.3447	1.46901	0.554844
Sptb	ENSMUSG00000021061	633.029	-0.199934	0.125599	-1.59184	0.11142	0.516062	82.9007	0.354414	0.198391	1.78645	0.0740269	0.808557	0.870591	1.27847	1.46851	0.554348
[truncated: 11,693 more rows]
