# Supplementary material for: Glucose-dependent miR-125b is a negative regulator of β-cell function
Source: bioRxiv preprint, doi:10.1101/2021.05.17.444559, version 3 (2022-03-09)
Supplement: Sup_Table3 [file 444559_file05.xlsx]

## Sheet: DEseq2_results_EndoCCRISPR_noNA
	Gene.stable.ID.version	baseMean	log2FoldChange	lfcSE	stat	pvalue	padj	Gene.stable.ID	Gene.name
10280	ENSG00000205670.12	445.084	2.00138	0.628596	3.18389	0.00145312	0.0427932	ENSG00000205670	SMIM11A
10729	ENSG00000240801.1	1416.15	1.59605	0.253907	6.28597	3.26e-10	1.01e-06	ENSG00000240801	AC132217.1
5491	ENSG00000142798.20	457.097	1.36518	0.216576	6.30345	2.91e-10	1.01e-06	ENSG00000142798	HSPG2
10067	ENSG00000198835.4	382.503	1.31776	0.243754	5.40611	6.44e-08	4.6e-05	ENSG00000198835	GJC2
10231	ENSG00000204922.5	676.233	1.27965	0.203999	6.27284	3.55e-10	1.01e-06	ENSG00000204922	UQCC3
11101	ENSG00000267303.1	455.294	1.26456	0.262759	4.81263	1.49e-06	0.000584878	ENSG00000267303	AC011511.4
7976	ENSG00000169962.5	735.21	1.19602	0.211001	5.66833	1.44e-08	1.49e-05	ENSG00000169962	TAS1R3
1497	ENSG00000099769.6	676.618	1.19036	0.221474	5.3747	7.67e-08	4.6e-05	ENSG00000099769	IGFALS
10636	ENSG00000233913.7	175.219	1.17503	0.282816	4.15477	3.26e-05	0.00407453	ENSG00000233913	RPL10P9
783	ENSG00000070031.4	941.923	1.15819	0.253547	4.56796	4.92e-06	0.00143797	ENSG00000070031	SCT
11151	ENSG00000270885.2	231.432	1.11602	0.257749	4.32988	1.49e-05	0.0027177	ENSG00000270885	RASL10B
4257	ENSG00000130829.18	1250.59	1.08791	0.185128	5.87651	4.19e-09	6.01e-06	ENSG00000130829	DUSP9
8164	ENSG00000171551.12	380.184	1.08092	0.275921	3.91752	8.95e-05	0.00742985	ENSG00000171551	ECEL1
8667	ENSG00000177133.11	189.261	1.07551	0.311115	3.45697	0.000546285	0.0227909	ENSG00000177133	PRDM16-DT
9476	ENSG00000186998.16	3573.2	1.0705	0.197723	5.41415	6.16e-08	4.6e-05	ENSG00000186998	EMID1
5035	ENSG00000137880.6	2687.78	1.05386	0.173026	6.09077	1.12e-09	2.56e-06	ENSG00000137880	GCHFR
11336	ENSG00000283782.2	377.243	1.04845	0.255233	4.10781	3.99e-05	0.00435717	ENSG00000283782	AC116366.2
7941	ENSG00000169692.13	8474	1.02503	0.173702	5.9011	3.61e-09	6.01e-06	ENSG00000169692	AGPAT2
10565	ENSG00000227097.5	949.793	1.01799	0.214906	4.73688	2.17e-06	0.000772285	ENSG00000227097	RPS28P7
10819	ENSG00000245848.3	1084.23	1.00545	0.183119	5.49069	4e-08	3.51e-05	ENSG00000245848	CEBPA
10262	ENSG00000205363.5	221.269	1.00074	0.34285	2.91889	0.00351284	0.0737702	ENSG00000205363	INSYN1
10851	ENSG00000248859.2	338.304	0.981946	0.231638	4.23914	2.24e-05	0.00334587	ENSG00000248859	LINC01574
1137	ENSG00000083807.10	364.405	0.976654	0.226011	4.32127	1.55e-05	0.0027177	ENSG00000083807	SLC27A5
4221	ENSG00000130702.15	2099.13	0.975436	0.173296	5.62872	1.82e-08	1.72e-05	ENSG00000130702	LAMA5
94	ENSG00000006327.14	258.303	0.974073	0.24753	3.93518	8.31e-05	0.00722649	ENSG00000006327	TNFRSF12A
4384	ENSG00000132329.11	1975.54	0.961724	0.221536	4.34117	1.42e-05	0.00268972	ENSG00000132329	RAMP1
6725	ENSG00000160180.15	603.578	0.940898	0.208874	4.50462	6.65e-06	0.00168257	ENSG00000160180	TFF3
11355	ENSG00000285304.1	195.584	0.936376	0.284424	3.29218	0.000994141	0.0334539	ENSG00000285304	Z83844.2
5390	ENSG00000141526.17	864.033	0.930424	0.184172	5.05192	4.37e-07	0.000226394	ENSG00000141526	SLC16A3
5389	ENSG00000141524.16	202.284	0.924077	0.327593	2.82081	0.00479028	0.0884327	ENSG00000141524	TMC6
11334	ENSG00000283293.1	246.705	0.922601	0.302908	3.04581	0.00232052	0.0574431	ENSG00000283293	RN7SK
4292	ENSG00000131187.10	156.942	0.921051	0.346465	2.65842	0.00785079	0.123531	ENSG00000131187	F12
4148	ENSG00000130005.13	2179.23	0.919406	0.158231	5.81054	6.23e-09	7.88e-06	ENSG00000130005	GAMT
11200	ENSG00000273420.1	383.613	0.919322	0.241661	3.80418	0.000142277	0.00992399	ENSG00000273420	AC008738.7
2444	ENSG00000108106.14	11046.8	0.918952	0.199184	4.61359	3.96e-06	0.00121801	ENSG00000108106	UBE2S
9002	ENSG00000181873.13	319.182	0.912659	0.289516	3.15236	0.00161956	0.045544	ENSG00000181873	IBA57
5027	ENSG00000137825.11	159.456	0.912361	0.319074	2.8594	0.00424442	0.0819174	ENSG00000137825	ITPKA
3519	ENSG00000120913.23	170.081	0.912132	0.320442	2.84648	0.00442057	0.083895	ENSG00000120913	PDLIM2
2656	ENSG00000110811.20	361.26	0.907406	0.321694	2.82071	0.00479169	0.0884327	ENSG00000110811	P3H3
7340	ENSG00000165238.16	209.809	0.907097	0.286442	3.16678	0.00154139	0.0446611	ENSG00000165238	WNK2
8360	ENSG00000173621.9	1107.92	0.899321	0.200974	4.47481	7.65e-06	0.00180053	ENSG00000173621	LRFN4
9037	ENSG00000182218.9	188.896	0.893168	0.349202	2.55774	0.0105354	0.148896	ENSG00000182218	HHIPL1
1361	ENSG00000090971.5	2866.31	0.891483	0.165402	5.38981	7.05e-08	4.6e-05	ENSG00000090971	NAT14
4506	ENSG00000133315.12	666.005	0.890838	0.21049	4.23221	2.31e-05	0.00334587	ENSG00000133315	MACROD1
9459	ENSG00000186654.21	608.101	0.88806	0.209868	4.23151	2.32e-05	0.00334587	ENSG00000186654	PRR5
4236	ENSG00000130748.7	1762.18	0.88294	0.206	4.28612	1.82e-05	0.0030447	ENSG00000130748	TMEM160
10780	ENSG00000243449.6	1650.73	0.879471	0.194724	4.51651	6.29e-06	0.00162696	ENSG00000243449	C4orf48
11097	ENSG00000267059.2	720.818	0.878127	0.212039	4.14134	3.45e-05	0.00418267	ENSG00000267059	AC005943.1
9940	ENSG00000198113.3	894.906	0.870386	0.181446	4.79694	1.61e-06	0.000611498	ENSG00000198113	TOR4A
9086	ENSG00000182809.11	4393.81	0.868317	0.179555	4.83595	1.33e-06	0.000538897	ENSG00000182809	CRIP2
2679	ENSG00000111186.13	179.592	0.866623	0.313319	2.76594	0.00567582	0.0993592	ENSG00000111186	WNT5B
9521	ENSG00000187714.7	5252.56	0.863852	0.147035	5.87513	4.23e-09	6.01e-06	ENSG00000187714	SLC18A3
83	ENSG00000006015.17	1163.16	0.863364	0.18435	4.68329	2.82e-06	0.000929215	ENSG00000006015	REX1BD
6213	ENSG00000152413.15	264.996	0.862915	0.26001	3.31878	0.000904109	0.03158	ENSG00000152413	HOMER1
4841	ENSG00000136367.14	817.788	0.859419	0.227507	3.77755	0.000158376	0.0104523	ENSG00000136367	ZFHX2
3570	ENSG00000121900.19	3898.12	0.854608	0.149563	5.71403	1.1e-08	1.26e-05	ENSG00000121900	TMEM54
9498	ENSG00000187244.12	5544.04	0.850665	0.172305	4.93698	7.93e-07	0.000347482	ENSG00000187244	BCAM
9361	ENSG00000185519.9	725.077	0.849333	0.187837	4.52165	6.14e-06	0.00162496	ENSG00000185519	FAM131C
3782	ENSG00000125089.17	736.912	0.84894	0.217776	3.89823	9.69e-05	0.00766223	ENSG00000125089	SH3TC1
6626	ENSG00000158792.16	2092.45	0.848451	0.172623	4.91504	8.88e-07	0.000374356	ENSG00000158792	SPATA2L
10177	ENSG00000204347.4	2264.17	0.848377	0.166603	5.0922	3.54e-07	0.000201509	ENSG00000204347	BTBD17
8662	ENSG00000177103.15	272.042	0.847945	0.271229	3.12631	0.00177013	0.0479915	ENSG00000177103	DSCAML1
10556	ENSG00000226416.1	323.939	0.847392	0.24126	3.51236	0.000444149	0.0198627	ENSG00000226416	MRPL23-AS1
9093	ENSG00000182871.16	727.947	0.846893	0.22795	3.71526	0.000202995	0.011915	ENSG00000182871	COL18A1
10003	ENSG00000198569.10	405.321	0.845688	0.221237	3.82254	0.000132086	0.00958	ENSG00000198569	SLC34A3
5971	ENSG00000148400.12	170.638	0.845242	0.312564	2.70422	0.00684642	0.113892	ENSG00000148400	NOTCH1
15	ENSG00000002330.14	3230.5	0.83908	0.187028	4.48637	7.24e-06	0.00175519	ENSG00000002330	BAD
5484	ENSG00000142694.6	1788.77	0.838325	0.185287	4.52446	6.06e-06	0.00162496	ENSG00000142694	EVA1B
9193	ENSG00000183828.15	1907.19	0.834988	0.19991	4.17682	2.96e-05	0.00376861	ENSG00000183828	NUDT14
1932	ENSG00000103024.7	2153.53	0.833933	0.187849	4.43938	9.02e-06	0.00193832	ENSG00000103024	NME3
8546	ENSG00000175602.4	1303.1	0.833741	0.213697	3.9015	9.56e-05	0.00766223	ENSG00000175602	CCDC85B
7051	ENSG00000163499.12	10010.1	0.830861	0.176361	4.71113	2.46e-06	0.000850061	ENSG00000163499	CRYBA2
3888	ENSG00000125995.16	2749.41	0.829032	0.188958	4.38738	1.15e-05	0.00233277	ENSG00000125995	ROMO1
1558	ENSG00000100116.17	848.646	0.828106	0.191618	4.32165	1.55e-05	0.0027177	ENSG00000100116	GCAT
882	ENSG00000073536.18	804.343	0.825455	0.182405	4.5254	6.03e-06	0.00162496	ENSG00000073536	NLE1
8854	ENSG00000179403.12	9968.02	0.82243	0.152939	5.3775	7.55e-08	4.6e-05	ENSG00000179403	VWA1
8028	ENSG00000170412.18	6859.59	0.818803	0.151606	5.40088	6.63e-08	4.6e-05	ENSG00000170412	GPRC5C
8093	ENSG00000170955.10	489.439	0.81597	0.215356	3.78894	0.000151293	0.0101701	ENSG00000170955	CAVIN3
7618	ENSG00000167244.21	89141	0.8143	0.162049	5.02502	5.03e-07	0.000238833	ENSG00000167244	IGF2
5577	ENSG00000143537.14	1943.1	0.814155	0.197821	4.11562	3.86e-05	0.00433308	ENSG00000143537	ADAM15
11111	ENSG00000267795.6	1258.93	0.809982	0.187239	4.32594	1.52e-05	0.0027177	ENSG00000267795	SMIM22
11231	ENSG00000275074.2	389.669	0.809688	0.225217	3.59515	0.000324204	0.0159126	ENSG00000275074	NUDT18
2401	ENSG00000107736.21	318.122	0.808575	0.306154	2.64107	0.00826445	0.128212	ENSG00000107736	CDH23
6874	ENSG00000162009.8	493.82	0.808048	0.206356	3.91579	9.01e-05	0.00742985	ENSG00000162009	SSTR5
4310	ENSG00000131435.13	286.551	0.804889	0.237311	3.39171	0.000694589	0.0263643	ENSG00000131435	PDLIM4
8187	ENSG00000171813.14	206.338	0.802233	0.272848	2.94022	0.00327984	0.0698085	ENSG00000171813	PWWP2B
5959	ENSG00000148334.15	3548.9	0.800758	0.161316	4.9639	6.91e-07	0.00031469	ENSG00000148334	PTGES2
10138	ENSG00000204052.4	366.395	0.798419	0.218493	3.65421	0.000257973	0.0134134	ENSG00000204052	LRRC73
10961	ENSG00000257529.5	271.553	0.797921	0.262733	3.03701	0.0023894	0.0582064	ENSG00000257529	RPL36A-HNRNPH2
1512	ENSG00000099864.18	1854.56	0.797757	0.17856	4.46771	7.91e-06	0.00180053	ENSG00000099864	PALM
9479	ENSG00000187045.19	6546.87	0.795852	0.192315	4.13827	3.5e-05	0.00419436	ENSG00000187045	TMPRSS6
6670	ENSG00000159335.18	16972.7	0.795157	0.191746	4.14694	3.37e-05	0.0041322	ENSG00000159335	PTMS
9478	ENSG00000187024.15	386.435	0.794723	0.234501	3.38899	0.00070151	0.0263763	ENSG00000187024	PTRH1
7432	ENSG00000165912.16	1021.32	0.793302	0.214961	3.69045	0.000223858	0.0124954	ENSG00000165912	PACSIN3
5468	ENSG00000142544.7	559.37	0.791532	0.252252	3.13787	0.00170182	0.0469217	ENSG00000142544	CTU1
10554	ENSG00000226287.8	333.701	0.787697	0.25925	3.03837	0.00237863	0.0582064	ENSG00000226287	TMEM191A
8801	ENSG00000178896.9	1185.88	0.785849	0.216285	3.6334	0.000279716	0.0142831	ENSG00000178896	EXOSC4
4162	ENSG00000130193.8	3640.14	0.784901	0.175545	4.47122	7.78e-06	0.00180053	ENSG00000130193	THEM6
8717	ENSG00000177697.19	6378.26	0.783415	0.187595	4.1761	2.97e-05	0.00376861	ENSG00000177697	CD151
1761	ENSG00000101220.18	1839.71	0.782748	0.202725	3.86113	0.000112866	0.0086838	ENSG00000101220	C20orf27
9126	ENSG00000183186.8	1129.42	0.780163	0.186155	4.19094	2.78e-05	0.0036783	ENSG00000183186	C2CD4C
10635	ENSG00000233493.4	1059.79	0.779173	0.200658	3.88309	0.000103135	0.00804385	ENSG00000233493	TMEM238
8292	ENSG00000172922.11	3628.46	0.778867	0.154475	5.04201	4.61e-07	0.000228067	ENSG00000172922	RNASEH2C
10109	ENSG00000198931.11	3071.68	0.778742	0.174707	4.45743	8.29e-06	0.00183781	ENSG00000198931	APRT
9205	ENSG00000183971.9	344.738	0.778709	0.295005	2.63965	0.00829915	0.128575	ENSG00000183971	NPW
7948	ENSG00000169738.8	4573.01	0.778446	0.189809	4.1012	4.11e-05	0.00437405	ENSG00000169738	DCXR
8575	ENSG00000176020.9	570.434	0.778361	0.264249	2.94556	0.00322373	0.0692615	ENSG00000176020	AMIGO3
7560	ENSG00000166823.5	687.674	0.778172	0.192837	4.03538	5.45e-05	0.00530561	ENSG00000166823	MESP1
9684	ENSG00000196358.11	725.434	0.775663	0.195605	3.96545	7.33e-05	0.00664936	ENSG00000196358	NTNG2
6755	ENSG00000160325.14	10937.9	0.775589	0.172573	4.49426	6.98e-06	0.00172815	ENSG00000160325	CACFD1
4036	ENSG00000128311.14	1091.81	0.774577	0.20542	3.7707	0.00016279	0.01053	ENSG00000128311	TST
11338	ENSG00000284194.3	773.735	0.773627	0.192918	4.01014	6.07e-05	0.00575825	ENSG00000284194	SCO2
9617	ENSG00000189043.10	306.53	0.772723	0.229725	3.36368	0.000769103	0.0279801	ENSG00000189043	NDUFA4
10333	ENSG00000213221.5	388.364	0.770407	0.234404	3.28666	0.00101382	0.0339506	ENSG00000213221	DNLZ
8288	ENSG00000172889.16	6243.26	0.768322	0.173708	4.42306	9.73e-06	0.00205199	ENSG00000172889	EGFL7
5023	ENSG00000137818.12	28257.3	0.767763	0.169798	4.52164	6.14e-06	0.00162496	ENSG00000137818	RPLP1
1500	ENSG00000099795.7	4492.16	0.766934	0.185879	4.12599	3.69e-05	0.00428918	ENSG00000099795	NDUFB7
7608	ENSG00000167136.7	1134.46	0.765061	0.182051	4.20246	2.64e-05	0.0035792	ENSG00000167136	ENDOG
2833	ENSG00000112667.13	1610.24	0.764024	0.194799	3.92211	8.78e-05	0.00742483	ENSG00000112667	DNPH1
2111	ENSG00000104870.13	12389.4	0.76274	0.185337	4.11542	3.86e-05	0.00433308	ENSG00000104870	FCGRT
4139	ENSG00000129911.9	1613.87	0.762318	0.181838	4.19228	2.76e-05	0.0036783	ENSG00000129911	KLF16
3314	ENSG00000118160.14	737.441	0.762082	0.259153	2.94067	0.00327506	0.0698085	ENSG00000118160	SLC8A2
4024	ENSG00000128185.10	3847.37	0.761947	0.17517	4.34977	1.36e-05	0.00265088	ENSG00000128185	DGCR6L
10398	ENSG00000214063.11	942.554	0.759792	0.200041	3.79818	0.000145765	0.0100575	ENSG00000214063	TSPAN4
10270	ENSG00000205544.4	720.522	0.758437	0.200115	3.79001	0.000150641	0.0101701	ENSG00000205544	TMEM256
7288	ENSG00000164880.16	4870.84	0.756928	0.213834	3.53979	0.000400447	0.0182395	ENSG00000164880	INTS1
10355	ENSG00000213563.7	2769.26	0.755505	0.18367	4.11339	3.9e-05	0.00433308	ENSG00000213563	C8orf82
7464	ENSG00000166166.13	1097.9	0.754793	0.210242	3.59012	0.000330525	0.0159855	ENSG00000166166	TRMT61A
5431	ENSG00000141933.9	1290.93	0.754234	0.20283	3.71856	0.000200365	0.0118831	ENSG00000141933	TPGS1
1567	ENSG00000100162.15	1459.84	0.754222	0.180648	4.1751	2.98e-05	0.00376861	ENSG00000100162	CENPM
8646	ENSG00000176973.8	3515.35	0.753643	0.176537	4.26903	1.96e-05	0.00319368	ENSG00000176973	FAM89B
8673	ENSG00000177191.2	1008.61	0.752252	0.170246	4.41861	9.93e-06	0.00205668	ENSG00000177191	B3GNT8
1509	ENSG00000099822.3	1408.85	0.75002	0.174157	4.30658	1.66e-05	0.00281776	ENSG00000099822	HCN2
5922	ENSG00000147804.10	741.505	0.748209	0.199868	3.74351	0.000181464	0.0112914	ENSG00000147804	SLC39A4
1910	ENSG00000102879.16	509.674	0.747434	0.229902	3.2511	0.00114957	0.0365648	ENSG00000102879	CORO1A
9294	ENSG00000184990.13	3317.84	0.747312	0.177128	4.21905	2.45e-05	0.00340758	ENSG00000184990	SIVA1
10513	ENSG00000223802.7	1558.1	0.746046	0.178138	4.18803	2.81e-05	0.00368287	ENSG00000223802	CERS1
7688	ENSG00000167700.9	2469.76	0.745646	0.185904	4.01092	6.05e-05	0.00575825	ENSG00000167700	MFSD3
8326	ENSG00000173272.16	3774.64	0.744674	0.162667	4.5779	4.7e-06	0.00140738	ENSG00000173272	MZT2A
9102	ENSG00000182938.7	317.008	0.743905	0.245046	3.03577	0.0023992	0.0582064	ENSG00000182938	OTOP3
1523	ENSG00000099953.10	251.477	0.740573	0.261888	2.82782	0.00468661	0.0870436	ENSG00000099953	MMP11
8241	ENSG00000172366.20	1815.2	0.740281	0.180484	4.10165	4.1e-05	0.00437405	ENSG00000172366	MCRIP2
1927	ENSG00000102981.9	1465.98	0.740029	0.194912	3.79673	0.000146618	0.0100575	ENSG00000102981	PARD6A
9788	ENSG00000196976.7	2050.36	0.738916	0.17969	4.11218	3.92e-05	0.00433308	ENSG00000196976	LAGE3
9339	ENSG00000185347.18	824.751	0.738516	0.218248	3.38383	0.000714811	0.0265999	ENSG00000185347	TEDC1
10630	ENSG00000233276.6	5873.22	0.738117	0.179486	4.11239	3.92e-05	0.00433308	ENSG00000233276	GPX1
1503	ENSG00000099804.9	3129.31	0.737029	0.169508	4.34805	1.37e-05	0.00265088	ENSG00000099804	CDC34
2402	ENSG00000107742.13	323.029	0.736863	0.246377	2.99079	0.00278258	0.0640106	ENSG00000107742	SPOCK2
9724	ENSG00000196544.8	984.723	0.735912	0.205926	3.57367	0.000352014	0.0167156	ENSG00000196544	BORCS6
8083	ENSG00000170889.14	21445.7	0.735177	0.170001	4.32454	1.53e-05	0.0027177	ENSG00000170889	RPS9
6594	ENSG00000158292.7	5437.66	0.734731	0.157859	4.65436	3.25e-06	0.00102796	ENSG00000158292	GPR153
638	ENSG00000065054.14	474.918	0.734695	0.20412	3.59934	0.00031903	0.0157948	ENSG00000065054	SLC9A3R2
6828	ENSG00000161179.14	1472.77	0.734605	0.191973	3.8266	0.000129925	0.00954491	ENSG00000161179	YDJC
7751	ENSG00000168101.14	1684.64	0.734592	0.177805	4.13146	3.6e-05	0.0042479	ENSG00000168101	NUDT16L1
3516	ENSG00000120896.13	1300.35	0.734318	0.190265	3.85945	0.000113644	0.00868498	ENSG00000120896	SORBS3
9179	ENSG00000183734.4	3831.83	0.733364	0.154721	4.73991	2.14e-06	0.000772285	ENSG00000183734	ASCL2
3185	ENSG00000116661.11	281.69	0.733315	0.254427	2.88222	0.00394878	0.0783359	ENSG00000116661	FBXO2
7472	ENSG00000166189.8	1534.42	0.733237	0.186423	3.9332	8.38e-05	0.00723106	ENSG00000166189	HPS6
8954	ENSG00000181029.9	2987.71	0.732491	0.172585	4.24424	2.19e-05	0.00334587	ENSG00000181029	TRAPPC5
1511	ENSG00000099849.15	1902.58	0.731958	0.206325	3.54759	0.000388766	0.0178503	ENSG00000099849	RASSF7
7940	ENSG00000169689.15	1836.66	0.731783	0.171385	4.26982	1.96e-05	0.00319368	ENSG00000169689	CENPX
5012	ENSG00000137731.14	1309.96	0.731265	0.172016	4.25113	2.13e-05	0.00334587	ENSG00000137731	FXYD2
3603	ENSG00000122490.19	3310.29	0.730698	0.179018	4.0817	4.47e-05	0.00458633	ENSG00000122490	SLC66A2
1971	ENSG00000103254.10	1906.31	0.730594	0.211728	3.45063	0.00055929	0.0228266	ENSG00000103254	ANTKMT
1453	ENSG00000095906.17	5107	0.730023	0.178628	4.08684	4.37e-05	0.00458633	ENSG00000095906	NUBP2
10234	ENSG00000204950.4	1191.71	0.729934	0.179132	4.07484	4.6e-05	0.00468143	ENSG00000204950	LRRC10B
8186	ENSG00000171798.18	691.636	0.728828	0.21182	3.44078	0.000580034	0.0233387	ENSG00000171798	KNDC1
8918	ENSG00000180448.10	464.066	0.727394	0.237222	3.06629	0.0021673	0.0550871	ENSG00000180448	ARHGAP45
9110	ENSG00000183010.17	5670.75	0.726691	0.155246	4.68091	2.86e-06	0.000929215	ENSG00000183010	PYCR1
3408	ENSG00000119632.4	661.334	0.726578	0.230304	3.15487	0.00160571	0.0454435	ENSG00000119632	IFI27L2
9477	ENSG00000187017.17	1225.27	0.725565	0.197536	3.67308	0.000239644	0.0129944	ENSG00000187017	ESPN
6315	ENSG00000154146.13	1215.62	0.725149	0.20354	3.56269	0.00036707	0.0172009	ENSG00000154146	NRGN
9047	ENSG00000182327.8	539.746	0.724086	0.229126	3.16021	0.00157654	0.0452703	ENSG00000182327	GLTPD2
10945	ENSG00000256514.1	313.007	0.723815	0.239777	3.0187	0.00253865	0.0598502	ENSG00000256514	AP003419.1
8552	ENSG00000175701.10	489.631	0.723476	0.241744	2.99273	0.00276491	0.0638438	ENSG00000175701	MTLN
2266	ENSG00000106003.13	845.773	0.723207	0.19488	3.71103	0.000206416	0.0119921	ENSG00000106003	LFNG
1045	ENSG00000079462.7	5874.39	0.723195	0.192383	3.75915	0.000170494	0.0107261	ENSG00000079462	PAFAH1B3
10139	ENSG00000204060.7	991.72	0.721318	0.171495	4.20607	2.6e-05	0.00356501	ENSG00000204060	FOXO6
3043	ENSG00000115286.20	2988.46	0.72051	0.179246	4.01967	5.83e-05	0.00562395	ENSG00000115286	NDUFS7
2228	ENSG00000105696.9	670.601	0.719236	0.227646	3.15945	0.00158065	0.0452703	ENSG00000105696	TMEM59L
7950	ENSG00000169750.9	1889.34	0.719185	0.184672	3.89439	9.84e-05	0.00773106	ENSG00000169750	RAC3
9212	ENSG00000184058.14	787.348	0.718611	0.183271	3.92104	8.82e-05	0.00742483	ENSG00000184058	TBX1
5271	ENSG00000140332.17	1008.59	0.718145	0.221676	3.23962	0.00119689	0.0373398	ENSG00000140332	TLE3
9234	ENSG00000184281.15	2641.02	0.71636	0.195971	3.65545	0.000256735	0.0134103	ENSG00000184281	TSSC4
2117	ENSG00000104886.12	2562.15	0.716061	0.193897	3.693	0.000221625	0.0124318	ENSG00000104886	PLEKHJ1
8473	ENSG00000174886.14	6251.15	0.715367	0.17922	3.99157	6.56e-05	0.0061264	ENSG00000174886	NDUFA11
2195	ENSG00000105472.13	319.709	0.715178	0.245202	2.91669	0.00353769	0.0737795	ENSG00000105472	CLEC11A
3407	ENSG00000119630.14	1518.34	0.71508	0.190189	3.75984	0.000170022	0.0107261	ENSG00000119630	PGF
3232	ENSG00000117122.14	657.382	0.714496	0.1871	3.8188	0.000134102	0.00966471	ENSG00000117122	MFAP2
6070	ENSG00000149823.9	5817.75	0.714465	0.169235	4.22173	2.42e-05	0.00340758	ENSG00000149823	VPS51
6853	ENSG00000161682.15	4371.09	0.714151	0.180663	3.95294	7.72e-05	0.00681417	ENSG00000161682	FAM171A2
5430	ENSG00000141905.19	880.375	0.713888	0.237081	3.01116	0.00260253	0.0612294	ENSG00000141905	NFIC
7851	ENSG00000168913.7	3425.78	0.71267	0.167228	4.26166	2.03e-05	0.00325428	ENSG00000168913	ENHO
2963	ENSG00000114395.11	1478.93	0.712624	0.181808	3.91965	8.87e-05	0.00742483	ENSG00000114395	CYB561D2
10802	ENSG00000244187.8	2077.05	0.712301	0.19358	3.67963	0.000233575	0.0127933	ENSG00000244187	TMEM141
6812	ENSG00000160972.9	2256.27	0.711997	0.162698	4.3762	1.21e-05	0.00241259	ENSG00000160972	PPP1R16A
3733	ENSG00000124302.13	556.36	0.711619	0.215598	3.30067	0.000964541	0.0328839	ENSG00000124302	CHST8
7784	ENSG00000168350.8	326.621	0.711519	0.227864	3.12256	0.00179287	0.0484927	ENSG00000168350	DEGS2
6900	ENSG00000162302.13	1469.69	0.710709	0.178411	3.98356	6.79e-05	0.00628514	ENSG00000162302	RPS6KA4
127	ENSG00000007376.8	2190.48	0.71058	0.192152	3.69801	0.000217295	0.0123663	ENSG00000007376	RPUSD1
10060	ENSG00000198816.7	5466.86	0.709226	0.174931	4.05431	5.03e-05	0.00497878	ENSG00000198816	ZNF358
3828	ENSG00000125652.8	1802.46	0.708515	0.189663	3.73566	0.000187222	0.0115864	ENSG00000125652	ALKBH7
2075	ENSG00000104518.11	396.871	0.707837	0.246688	2.86936	0.00411306	0.0802767	ENSG00000104518	GSDMD
7743	ENSG00000168061.17	2575.3	0.705635	0.20582	3.42841	0.000607124	0.0241725	ENSG00000168061	SAC3D1
1621	ENSG00000100379.17	1579.9	0.705398	0.178035	3.96213	7.43e-05	0.00664936	ENSG00000100379	KCTD17
8718	ENSG00000177700.6	2515.9	0.703918	0.182503	3.85703	0.000114775	0.00871294	ENSG00000177700	POLR2L
231	ENSG00000013306.16	8325.54	0.703783	0.157979	4.45492	8.39e-06	0.00183781	ENSG00000013306	SLC25A39
1929	ENSG00000102996.5	4270.51	0.703211	0.166677	4.219	2.45e-05	0.00340758	ENSG00000102996	MMP15
11034	ENSG00000261236.8	2933.41	0.701747	0.195279	3.59356	0.000326188	0.0159412	ENSG00000261236	BOP1
3652	ENSG00000123159.16	5065.05	0.701515	0.18279	3.83781	0.000124136	0.00923881	ENSG00000123159	GIPC1
1525	ENSG00000099958.15	792.844	0.701471	0.179871	3.89985	9.63e-05	0.00766223	ENSG00000099958	DERL3
7979	ENSG00000169972.12	930.682	0.701461	0.182208	3.84978	0.000118225	0.00891545	ENSG00000169972	PUSL1
7290	ENSG00000164889.14	12592.1	0.700069	0.218646	3.20184	0.00136554	0.0409194	ENSG00000164889	SLC4A2
7942	ENSG00000169696.16	2103.34	0.697602	0.208636	3.34363	0.000826892	0.0297029	ENSG00000169696	ASPSCR1
3984	ENSG00000127540.12	1563.68	0.695059	0.167622	4.14658	3.37e-05	0.0041322	ENSG00000127540	UQCR11
2131	ENSG00000104976.12	865.147	0.694953	0.195558	3.55369	0.000379863	0.0176551	ENSG00000104976	SNAPC2
2924	ENSG00000113763.12	3138.47	0.694888	0.16823	4.13058	3.62e-05	0.0042479	ENSG00000113763	UNC5A
10338	ENSG00000213339.9	1621.11	0.694549	0.164073	4.23317	2.3e-05	0.00334587	ENSG00000213339	QTRT1
3557	ENSG00000121680.16	1342.06	0.694204	0.183567	3.78175	0.000155728	0.01037	ENSG00000121680	PEX16
10519	ENSG00000224051.7	898.853	0.694094	0.189112	3.67028	0.000242289	0.0130139	ENSG00000224051	CPTP
9116	ENSG00000183048.12	4075.15	0.693751	0.174239	3.9816	6.85e-05	0.00628607	ENSG00000183048	SLC25A10
713	ENSG00000067221.14	1807.25	0.692816	0.192876	3.59202	0.000328123	0.0159672	ENSG00000067221	STOML1
8866	ENSG00000179627.10	636.813	0.690216	0.191316	3.60773	0.000308887	0.0154947	ENSG00000179627	ZBTB42
10722	ENSG00000240342.3	6019.33	0.68965	0.167943	4.10646	4.02e-05	0.00435717	ENSG00000240342	RPS2P5
5429	ENSG00000141873.11	4411.74	0.689603	0.18936	3.64176	0.000270779	0.0139518	ENSG00000141873	SLC39A3
124	ENSG00000007255.10	507.156	0.688203	0.211793	3.24941	0.00115643	0.0365929	ENSG00000007255	TRAPPC6A
9026	ENSG00000182154.8	2832.68	0.686934	0.171474	4.00604	6.17e-05	0.00581056	ENSG00000182154	MRPL41
6186	ENSG00000152082.15	9085.73	0.685861	0.167915	4.08458	4.42e-05	0.00458633	ENSG00000152082	MZT2B
6741	ENSG00000160226.16	979.477	0.685344	0.23081	2.9693	0.00298481	0.0665128	ENSG00000160226	CFAP410
1495	ENSG00000099624.8	3218.77	0.684821	0.198361	3.4524	0.000555621	0.0227909	ENSG00000099624	ATP5F1D
7454	ENSG00000166126.11	3997.16	0.684814	0.179777	3.80923	0.0001394	0.00988065	ENSG00000166126	AMN
9390	ENSG00000185803.12	4714.6	0.682721	0.194398	3.51197	0.000444804	0.0198627	ENSG00000185803	SLC52A2
9182	ENSG00000183751.15	2283.28	0.682186	0.220006	3.10077	0.0019302	0.0508778	ENSG00000183751	TBL3
1502	ENSG00000099800.8	2492.82	0.680872	0.179033	3.80304	0.000142929	0.00992399	ENSG00000099800	TIMM13
9051	ENSG00000182379.10	457.903	0.680491	0.235539	2.88908	0.00386368	0.0777232	ENSG00000182379	NXPH4
767	ENSG00000069275.13	5936.91	0.680444	0.167279	4.06773	4.75e-05	0.00478386	ENSG00000069275	NUCKS1
10543	ENSG00000225663.8	4537.2	0.679113	0.199886	3.3975	0.000680037	0.0261487	ENSG00000225663	MCRIP1
11329	ENSG00000283103.3	345.812	0.678286	0.221431	3.0632	0.00218985	0.0554179	ENSG00000283103	AC010642.2
2651	ENSG00000110719.10	408.548	0.677747	0.210382	3.2215	0.00127522	0.0392459	ENSG00000110719	TCIRG1
9166	ENSG00000183628.14	2812.34	0.675689	0.171631	3.93688	8.25e-05	0.00722649	ENSG00000183628	DGCR6
6067	ENSG00000149798.5	317.06	0.675395	0.254028	2.65874	0.00784332	0.123531	ENSG00000149798	CDC42EP2
4261	ENSG00000130881.14	5276.9	0.675251	0.17049	3.96065	7.47e-05	0.00664936	ENSG00000130881	LRP3
7428	ENSG00000165886.5	574.481	0.675203	0.225141	2.99902	0.00270852	0.0629427	ENSG00000165886	UBTD1
8330	ENSG00000173327.8	5741.09	0.673282	0.182048	3.69837	0.000216988	0.0123663	ENSG00000173327	MAP3K11
7408	ENSG00000165716.11	2162.26	0.671818	0.164573	4.08218	4.46e-05	0.00458633	ENSG00000165716	DIPK1B
8144	ENSG00000171425.10	673.927	0.671152	0.213237	3.14744	0.00164706	0.0459683	ENSG00000171425	ZNF581
9551	ENSG00000188186.10	2589.77	0.671098	0.192994	3.47731	0.000506481	0.0216915	ENSG00000188186	LAMTOR4
9393	ENSG00000185818.8	937.798	0.670127	0.212442	3.1544	0.0016083	0.0454435	ENSG00000185818	NAT8L
9402	ENSG00000185909.15	2498.41	0.670119	0.1828	3.66587	0.0002465	0.0131323	ENSG00000185909	KLHDC8B
3941	ENSG00000126768.12	10100.5	0.670073	0.194454	3.44592	0.000569113	0.0230499	ENSG00000126768	TIMM17B
6848	ENSG00000161618.10	1014.47	0.669736	0.197629	3.38885	0.000701854	0.0263763	ENSG00000161618	ALDH16A1
3815	ENSG00000125520.14	9546.26	0.669286	0.164877	4.05932	4.92e-05	0.00491606	ENSG00000125520	SLC2A4RG
11211	ENSG00000274012.1	1391.97	0.668056	0.192424	3.4718	0.000516985	0.0220484	ENSG00000274012	RN7SL2
11272	ENSG00000277972.2	1384.91	0.66711	0.176109	3.78805	0.000151832	0.0101701	ENSG00000277972	CISD3
10348	ENSG00000213445.10	1213.34	0.666957	0.212693	3.13577	0.00171404	0.0471445	ENSG00000213445	SIPA1
4327	ENSG00000131591.17	557.108	0.666868	0.204085	3.2676	0.00108465	0.0353481	ENSG00000131591	C1orf159
3850	ENSG00000125817.8	13040.1	0.665952	0.193184	3.44724	0.000566349	0.0230322	ENSG00000125817	CENPB
916	ENSG00000075043.18	3407.32	0.665596	0.17883	3.72195	0.000197688	0.0118478	ENSG00000075043	KCNQ2
4027	ENSG00000128228.5	2456.08	0.665399	0.173971	3.82476	0.000130898	0.00955469	ENSG00000128228	SDF2L1
4035	ENSG00000128309.16	3581.4	0.663811	0.195164	3.40129	0.000670677	0.0260648	ENSG00000128309	MPST
10701	ENSG00000238227.8	2661.8	0.66251	0.173952	3.80858	0.000139765	0.00988065	ENSG00000238227	TMEM250
9112	ENSG00000183018.9	414.226	0.66189	0.217166	3.04785	0.00230487	0.0573048	ENSG00000183018	SPNS2
10575	ENSG00000228300.14	1263.35	0.661433	0.207809	3.18289	0.00145813	0.0427932	ENSG00000228300	FAM174C
2304	ENSG00000106399.11	339.685	0.661039	0.252668	2.61623	0.00889054	0.133911	ENSG00000106399	RPA3
8152	ENSG00000171462.15	310.674	0.660175	0.228792	2.88548	0.00390815	0.0780739	ENSG00000171462	DLK2
4232	ENSG00000130731.16	1647.49	0.659894	0.204924	3.22018	0.0012811	0.0393204	ENSG00000130731	METTL26
152	ENSG00000008382.16	1016.08	0.658942	0.201689	3.26712	0.00108649	0.0353481	ENSG00000008382	MPND
8477	ENSG00000174917.9	1614.7	0.658582	0.182045	3.61768	0.000297253	0.0150437	ENSG00000174917	MICOS13
5422	ENSG00000141753.7	625.808	0.657967	0.221894	2.96524	0.00302452	0.0670042	ENSG00000141753	IGFBP4
5609	ENSG00000143774.16	5137.06	0.65745	0.167405	3.92731	8.59e-05	0.00735468	ENSG00000143774	GUK1
8610	ENSG00000176428.6	749.728	0.656667	0.190135	3.45368	0.000552989	0.0227909	ENSG00000176428	VPS37D
3898	ENSG00000126106.14	798.388	0.656049	0.177461	3.69686	0.000218287	0.0123663	ENSG00000126106	TMEM53
6048	ENSG00000149541.10	6633.2	0.655928	0.196301	3.34145	0.00083343	0.0298436	ENSG00000149541	B3GAT3
1313	ENSG00000089356.18	1032.98	0.655877	0.192293	3.41082	0.000647684	0.0254243	ENSG00000089356	FXYD3
9920	ENSG00000197982.14	3582.41	0.655541	0.193111	3.39464	0.000687183	0.0261704	ENSG00000197982	C1orf122
8416	ENSG00000174276.7	890.96	0.655205	0.20954	3.12687	0.00176679	0.0479915	ENSG00000174276	ZNHIT2
3919	ENSG00000126432.14	10516	0.655099	0.17207	3.80716	0.000140569	0.00988065	ENSG00000126432	PRDX5
8661	ENSG00000177096.9	575.139	0.65497	0.206529	3.17133	0.00151744	0.0440794	ENSG00000177096	PHETA2
5456	ENSG00000142327.13	5685.83	0.654828	0.187588	3.49077	0.000481633	0.0211706	ENSG00000142327	RNPEPL1
4331	ENSG00000131669.10	352.991	0.654821	0.228675	2.86354	0.00418935	0.0811294	ENSG00000131669	NINJ1
11245	ENSG00000276168.1	1083.09	0.654574	0.222349	2.9439	0.00324101	0.0693711	ENSG00000276168	RN7SL1
8229	ENSG00000172264.17	372.588	0.654094	0.21541	3.03651	0.00239334	0.0582064	ENSG00000172264	MACROD2
8779	ENSG00000178531.6	3160.06	0.653785	0.196627	3.32499	0.000884203	0.0311716	ENSG00000178531	CTXN1
6623	ENSG00000158747.15	1002.24	0.652528	0.230018	2.83686	0.00455593	0.0856079	ENSG00000158747	NBL1
4788	ENSG00000135940.7	2544.58	0.652363	0.164586	3.96365	7.38e-05	0.00664936	ENSG00000135940	COX5B
11205	ENSG00000273619.1	293.29	0.651674	0.253519	2.57051	0.0101548	0.145816	ENSG00000273619	AL121832.2
8896	ENSG00000180089.6	859.249	0.650788	0.2007	3.24259	0.00118448	0.0370541	ENSG00000180089	TMEM86B
1973	ENSG00000103260.9	770.57	0.650563	0.213233	3.05096	0.00228115	0.0569636	ENSG00000103260	METRN
4058	ENSG00000128626.11	1268.86	0.650519	0.209115	3.11082	0.00186567	0.0498695	ENSG00000128626	MRPS12
5834	ENSG00000146540.15	1470.32	0.650513	0.193721	3.35798	0.00078513	0.0283818	ENSG00000146540	C7orf50
7151	ENSG00000163975.12	705.169	0.649238	0.185296	3.50379	0.000458695	0.0203554	ENSG00000163975	MELTF
9597	ENSG00000188760.10	3875.14	0.649183	0.192898	3.36542	0.000764263	0.0279036	ENSG00000188760	TMEM198
10317	ENSG00000212864.3	768.576	0.648821	0.205378	3.15915	0.00158229	0.0452703	ENSG00000212864	RNF208
2232	ENSG00000105701.16	10473	0.648328	0.18944	3.42233	0.000620867	0.0245479	ENSG00000105701	FKBP8
1360	ENSG00000090932.11	275.071	0.6467	0.24674	2.62098	0.00876784	0.133119	ENSG00000090932	DLL3
6759	ENSG00000160360.13	2584.92	0.646558	0.168778	3.83083	0.000127714	0.00944335	ENSG00000160360	GPSM1
5426	ENSG00000141854.9	878.12	0.645625	0.175852	3.67142	0.000241204	0.0130139	ENSG00000141854	MISP3
7095	ENSG00000163702.20	442.138	0.645353	0.218274	2.95662	0.00311034	0.0679798	ENSG00000163702	IL17RC
8571	ENSG00000175938.7	679.099	0.644965	0.184869	3.48877	0.000485248	0.0211706	ENSG00000175938	ORAI3
8123	ENSG00000171222.10	9839.16	0.643372	0.181308	3.5485	0.000387425	0.0178503	ENSG00000171222	SCAND1
333	ENSG00000030110.13	1627.08	0.642195	0.188889	3.39985	0.00067423	0.0261138	ENSG00000030110	BAK1
1985	ENSG00000103363.15	5256.28	0.642032	0.170599	3.76341	0.000167613	0.0106626	ENSG00000103363	ELOB
6765	ENSG00000160446.19	3388.39	0.641658	0.185667	3.45596	0.00054834	0.0227909	ENSG00000160446	ZDHHC12
8630	ENSG00000176720.6	1453.87	0.641176	0.216077	2.96734	0.00300384	0.0667338	ENSG00000176720	BOK
3257	ENSG00000117410.14	12834.8	0.640454	0.1698	3.77181	0.000162066	0.01053	ENSG00000117410	ATP6V0B
3639	ENSG00000122971.9	753.1	0.639024	0.214243	2.98271	0.0028571	0.0648316	ENSG00000122971	ACADS
837	ENSG00000071889.17	2826.62	0.638673	0.179975	3.54867	0.000387188	0.0178503	ENSG00000071889	FAM3A
4517	ENSG00000133477.17	1477	0.6385	0.199129	3.20646	0.00134381	0.0408834	ENSG00000133477	FAM83F
397	ENSG00000040608.14	1100.62	0.638149	0.172188	3.70613	0.000210452	0.0121646	ENSG00000040608	RTN4R
10765	ENSG00000242372.9	5570.93	0.638131	0.169837	3.75732	0.000171745	0.0107454	ENSG00000242372	EIF6
602	ENSG00000063241.8	1566.31	0.63751	0.172547	3.6947	0.00022015	0.0124101	ENSG00000063241	ISOC2
2621	ENSG00000110245.12	471.747	0.63708	0.200079	3.18415	0.0014518	0.0427932	ENSG00000110245	APOC3
1491	ENSG00000099377.14	439.931	0.636901	0.221395	2.87676	0.00401786	0.0794296	ENSG00000099377	HSD3B7
1226	ENSG00000087086.15	98765.2	0.636491	0.150023	4.24261	2.21e-05	0.00334587	ENSG00000087086	FTL
7722	ENSG00000167969.13	3317.43	0.635572	0.189186	3.3595	0.000780839	0.0283166	ENSG00000167969	ECI1
9581	ENSG00000188573.8	2378.11	0.635473	0.188599	3.36944	0.00075322	0.0278297	ENSG00000188573	FBLL1
8598	ENSG00000176340.4	9822.09	0.635285	0.162921	3.89934	9.65e-05	0.00766223	ENSG00000176340	COX8A
22	ENSG00000002933.9	388.483	0.635282	0.215611	2.94642	0.00321473	0.0691987	ENSG00000002933	TMEM176A
9546	ENSG00000188157.15	3231.94	0.634627	0.192369	3.299	0.000970295	0.0329813	ENSG00000188157	AGRN
3973	ENSG00000127399.15	3787.33	0.634571	0.191432	3.31486	0.000916881	0.0319282	ENSG00000127399	LRRC61
7604	ENSG00000167114.13	4723.63	0.633837	0.190695	3.32383	0.000887902	0.0312054	ENSG00000167114	SLC27A4
6815	ENSG00000160999.10	508.616	0.633678	0.224904	2.81755	0.0048392	0.0889109	ENSG00000160999	SH2B2
5481	ENSG00000142684.9	727.539	0.633069	0.191334	3.30871	0.000937253	0.0323773	ENSG00000142684	ZNF593
3064	ENSG00000115457.10	3091.34	0.631801	0.156084	4.04782	5.17e-05	0.0050748	ENSG00000115457	IGFBP2
4361	ENSG00000132004.13	525.326	0.631556	0.21842	2.89148	0.00383431	0.0776892	ENSG00000132004	FBXW9
2646	ENSG00000110697.13	6693.31	0.631128	0.146201	4.31684	1.58e-05	0.00273078	ENSG00000110697	PITPNM1
4028	ENSG00000128242.13	2194.94	0.629752	0.176738	3.5632	0.000366358	0.0172009	ENSG00000128242	GAL3ST1
1784	ENSG00000101400.6	3021.12	0.629227	0.196506	3.20207	0.00136444	0.0409194	ENSG00000101400	SNTA1
1091	ENSG00000081692.12	1181.55	0.628877	0.201539	3.12037	0.00180622	0.0487379	ENSG00000081692	JMJD4
8648	ENSG00000176978.14	6420.3	0.627968	0.171534	3.6609	0.000251333	0.0132497	ENSG00000176978	DPP7
2186	ENSG00000105404.11	4443.82	0.627731	0.198548	3.16161	0.00156902	0.0452315	ENSG00000105404	RABAC1
3176	ENSG00000116544.12	1634.2	0.627011	0.170406	3.6795	0.000233688	0.0127933	ENSG00000116544	DLGAP3
2200	ENSG00000105518.14	2195.21	0.626726	0.17986	3.48452	0.000493016	0.0213459	ENSG00000105518	TMEM205
8084	ENSG00000170892.12	3448.3	0.626722	0.168348	3.72277	0.000197053	0.0118478	ENSG00000170892	TSEN34
4017	ENSG00000128011.5	794.63	0.626181	0.238244	2.62832	0.00858075	0.131404	ENSG00000128011	LRFN1
685	ENSG00000066379.15	412.032	0.625906	0.214492	2.91809	0.00352181	0.0737702	ENSG00000066379	ZNRD1
8049	ENSG00000170604.5	3801.55	0.625318	0.200689	3.11586	0.00183407	0.0492561	ENSG00000170604	IRF2BP1
5420	ENSG00000141738.14	769.717	0.625216	0.18532	3.37371	0.00074162	0.0275076	ENSG00000141738	GRB7
7697	ENSG00000167747.15	3683.22	0.625191	0.165888	3.76875	0.000164067	0.01053	ENSG00000167747	C19orf48
132	ENSG00000007541.17	5173.18	0.624966	0.187905	3.32596	0.000881145	0.0311602	ENSG00000007541	PIGQ
7179	ENSG00000164081.13	2587.8	0.624531	0.167637	3.72549	0.000194934	0.0118478	ENSG00000164081	TEX264
4855	ENSG00000136490.9	918.639	0.624089	0.205693	3.03408	0.0024127	0.0582064	ENSG00000136490	LIMD2
6929	ENSG00000162585.17	2593.4	0.62328	0.175846	3.54448	0.000393393	0.0179902	ENSG00000162585	FAAP20
4147	ENSG00000129993.15	659.103	0.622655	0.218044	2.85564	0.00429507	0.082406	ENSG00000129993	CBFA2T3
9111	ENSG00000183011.13	1956.01	0.619758	0.179016	3.46203	0.00053611	0.0226099	ENSG00000183011	NAA38
10581	ENSG00000228594.4	1985.54	0.619458	0.169414	3.65647	0.000255713	0.0134103	ENSG00000228594	FNDC10
2603	ENSG00000110046.13	4799.7	0.619397	0.190466	3.25201	0.00114592	0.0365507	ENSG00000110046	ATG2A
8889	ENSG00000179965.12	456.814	0.618542	0.209778	2.94856	0.00319259	0.068983	ENSG00000179965	ZNF771
9428	ENSG00000186193.9	1408.25	0.618409	0.16767	3.68825	0.000225802	0.0125425	ENSG00000186193	SAPCD2
9727	ENSG00000196557.13	9684.44	0.617728	0.165886	3.7238	0.000196244	0.0118478	ENSG00000196557	CACNA1H
8087	ENSG00000170906.16	1303.04	0.617203	0.178039	3.46668	0.000526934	0.0223888	ENSG00000170906	NDUFA3
7122	ENSG00000163870.16	1683.78	0.617133	0.186535	3.3084	0.000938307	0.0323773	ENSG00000163870	TPRA1
11128	ENSG00000269313.5	1105.35	0.616392	0.218011	2.82735	0.00469349	0.0870436	ENSG00000269313	MAGIX
7463	ENSG00000166165.13	8514.54	0.615876	0.158738	3.87983	0.000104531	0.00809724	ENSG00000166165	CKB
11136	ENSG00000269858.6	4221.69	0.615772	0.170906	3.603	0.00031457	0.015642	ENSG00000269858	EGLN2
8407	ENSG00000174165.8	1521.23	0.614102	0.179725	3.41689	0.000633407	0.0249571	ENSG00000174165	ZDHHC24
6810	ENSG00000160957.14	3280.91	0.613776	0.208223	2.94769	0.00320156	0.0690458	ENSG00000160957	RECQL4
8513	ENSG00000175221.15	3372.98	0.613677	0.191558	3.20361	0.00135716	0.0408834	ENSG00000175221	MED16
6456	ENSG00000156381.9	2199.15	0.61314	0.186693	3.28422	0.00102266	0.0339506	ENSG00000156381	ANKRD9
639	ENSG00000065057.9	778.767	0.61278	0.208568	2.93803	0.00330301	0.0700398	ENSG00000065057	NTHL1
9888	ENSG00000197779.14	436.636	0.612643	0.215079	2.84846	0.00439311	0.0836066	ENSG00000197779	ZNF81
88	ENSG00000006118.15	12759	0.61111	0.190711	3.20438	0.00135352	0.0408834	ENSG00000006118	TMEM132A
4145	ENSG00000129968.16	3409.01	0.610647	0.180395	3.38506	0.000711639	0.0265999	ENSG00000129968	ABHD17A
7097	ENSG00000163704.12	1295.44	0.610415	0.164482	3.71113	0.000206337	0.0119921	ENSG00000163704	PRRT3
6819	ENSG00000161016.17	39051.4	0.610226	0.165049	3.69724	0.000217959	0.0123663	ENSG00000161016	RPL8
7660	ENSG00000167543.16	7278.6	0.610156	0.187623	3.25204	0.0011458	0.0365507	ENSG00000167543	TP53I13
2967	ENSG00000114439.19	714.091	0.609542	0.196433	3.10305	0.00191535	0.0506035	ENSG00000114439	BBX
6561	ENSG00000157870.17	1731.84	0.609153	0.163138	3.73398	0.000188478	0.0116011	ENSG00000157870	PRXL2B
5269	ENSG00000140323.6	2227.13	0.608545	0.217016	2.80415	0.00504492	0.0916212	ENSG00000140323	DISP2
10592	ENSG00000229833.10	742.089	0.607423	0.186165	3.26281	0.00110312	0.0355841	ENSG00000229833	PET100
2496	ENSG00000108639.7	4585.62	0.60656	0.185773	3.26505	0.00109443	0.0354043	ENSG00000108639	SYNGR2
9164	ENSG00000183617.5	797.384	0.60643	0.198949	3.04816	0.00230246	0.0573048	ENSG00000183617	MRPL54
3402	ENSG00000119559.17	1518.02	0.606146	0.20077	3.0191	0.00253523	0.0598502	ENSG00000119559	C19orf25
646	ENSG00000065268.11	1986.12	0.604837	0.187553	3.22489	0.00126021	0.0388889	ENSG00000065268	WDR18
5454	ENSG00000142235.11	438.88	0.604126	0.211661	2.85421	0.00431433	0.0824923	ENSG00000142235	LMTK3
6542	ENSG00000157593.19	4048.01	0.603424	0.160147	3.76793	0.000164604	0.01053	ENSG00000157593	SLC35B2
10637	ENSG00000233927.5	8459.94	0.603324	0.163682	3.68594	0.000227857	0.0125952	ENSG00000233927	RPS28
10914	ENSG00000254647.7	720116	0.601735	0.165482	3.63626	0.00027662	0.0141886	ENSG00000254647	INS
1212	ENSG00000086504.17	2958.21	0.600049	0.17597	3.40996	0.000649729	0.0254243	ENSG00000086504	MRPL28
7701	ENSG00000167775.11	6597.41	0.600042	0.196161	3.05893	0.00222132	0.0559605	ENSG00000167775	CD320
1333	ENSG00000090097.21	4688.62	0.59996	0.156096	3.84352	0.00012128	0.00908563	ENSG00000090097	PCBP4
189	ENSG00000011009.11	4416.63	0.599929	0.188451	3.18347	0.00145521	0.0427932	ENSG00000011009	LYPLA2
5673	ENSG00000144485.11	17589.3	0.598281	0.18094	3.30652	0.000944624	0.0324968	ENSG00000144485	HES6
9246	ENSG00000184436.12	2110.47	0.597986	0.182349	3.27935	0.00104048	0.0341438	ENSG00000184436	THAP7
131	ENSG00000007520.4	3121.97	0.597879	0.192667	3.10317	0.00191463	0.0506035	ENSG00000007520	TSR3
7308	ENSG00000164967.10	651.798	0.597325	0.20027	2.9826	0.00285812	0.0648316	ENSG00000164967	RPP25L
8315	ENSG00000173171.14	2195.79	0.595791	0.173448	3.43499	0.000592576	0.023676	ENSG00000173171	MTX1
3893	ENSG00000126062.4	3949.15	0.59555	0.175338	3.39658	0.000682348	0.0261487	ENSG00000126062	TMEM115
7677	ENSG00000167645.17	1756.54	0.594848	0.180713	3.29167	0.00099595	0.0334539	ENSG00000167645	YIF1B
4214	ENSG00000130643.9	1656.59	0.594658	0.194515	3.05712	0.00223472	0.0561739	ENSG00000130643	CALY
6928	ENSG00000162552.15	4662.82	0.59445	0.155808	3.81526	0.000136038	0.00974256	ENSG00000162552	WNT4
1953	ENSG00000103152.12	1404.69	0.594226	0.180304	3.29569	0.000981786	0.0332726	ENSG00000103152	MPG
10759	ENSG00000242114.6	432.931	0.593973	0.216005	2.74981	0.00596298	0.102879	ENSG00000242114	MTFP1
6069	ENSG00000149809.16	6023.45	0.593721	0.175127	3.39023	0.000698336	0.0263763	ENSG00000149809	TM7SF2
5870	ENSG00000147123.11	12182.5	0.593671	0.165391	3.58951	0.000331306	0.0159855	ENSG00000147123	NDUFB11
4500	ENSG00000133247.14	1801.05	0.593595	0.170704	3.47733	0.000506425	0.0216915	ENSG00000133247	KMT5C
8578	ENSG00000176058.13	1690.96	0.59353	0.192244	3.08739	0.00201924	0.0521384	ENSG00000176058	TPRN
11369	ENSG00000286070.2	472.897	0.593003	0.223202	2.6568	0.00788863	0.1239	ENSG00000286070	AP000356.5
4646	ENSG00000134825.16	1740.66	0.591533	0.165536	3.57345	0.000352309	0.0167156	ENSG00000134825	TMEM258
492	ENSG00000053371.12	4641.91	0.5908	0.177	3.33786	0.000844274	0.0301372	ENSG00000053371	AKR7A2
7650	ENSG00000167508.12	17116.4	0.589655	0.203735	2.89422	0.00380097	0.0772887	ENSG00000167508	MVD
2650	ENSG00000110717.13	4083.23	0.589135	0.187258	3.1461	0.00165461	0.0460554	ENSG00000110717	NDUFS8
11105	ENSG00000267534.4	413.835	0.589064	0.224177	2.62767	0.00859714	0.131404	ENSG00000267534	S1PR2
9357	ENSG00000185504.17	3546.13	0.58896	0.198038	2.97397	0.00293973	0.0658952	ENSG00000185504	FAAP100
7647	ENSG00000167476.10	6312.29	0.588776	0.164438	3.58054	0.000342884	0.0164051	ENSG00000167476	JSRP1
1508	ENSG00000099821.14	3568.17	0.588363	0.18436	3.19138	0.00141594	0.0419878	ENSG00000099821	POLRMT
3931	ENSG00000126603.9	4661.55	0.588337	0.155991	3.7716	0.000162201	0.01053	ENSG00000126603	GLIS2
1963	ENSG00000103202.13	3822.44	0.588128	0.150254	3.91422	9.07e-05	0.00742985	ENSG00000103202	NME4
2077	ENSG00000104524.14	928.139	0.58782	0.193607	3.03615	0.00239624	0.0582064	ENSG00000104524	PYCR3
1539	ENSG00000100033.16	3213.07	0.587529	0.154948	3.79177	0.000149576	0.0101701	ENSG00000100033	PRODH
9321	ENSG00000185187.13	2553.36	0.587462	0.178307	3.29467	0.000985382	0.0332954	ENSG00000185187	SIGIRR
6701	ENSG00000159792.10	2941.32	0.586596	0.189675	3.09264	0.00198383	0.0515751	ENSG00000159792	PSKH1
8864	ENSG00000179588.9	4816.81	0.586589	0.169498	3.46074	0.000538685	0.0226347	ENSG00000179588	ZFPM1
9128	ENSG00000183248.12	4044.47	0.585158	0.200924	2.91234	0.00358734	0.074341	ENSG00000183248	PRR36
9969	ENSG00000198324.13	2186.41	0.58478	0.194851	3.00116	0.00268952	0.0626913	ENSG00000198324	PHETA1
8388	ENSG00000173898.14	5684.55	0.584691	0.18521	3.15691	0.00159451	0.0453918	ENSG00000173898	SPTBN2
10246	ENSG00000205138.4	1179.88	0.583799	0.200378	2.91349	0.00357418	0.0742686	ENSG00000205138	SDHAF1
6702	ENSG00000159840.16	964.19	0.583798	0.201012	2.90429	0.00368084	0.0757002	ENSG00000159840	ZYX
7699	ENSG00000167771.6	2096.51	0.583535	0.162633	3.58805	0.000333166	0.0160074	ENSG00000167771	RCOR2
2819	ENSG00000112514.18	8804.2	0.58305	0.173078	3.36872	0.000755193	0.0278297	ENSG00000112514	CUTA
7756	ENSG00000168159.13	4570.3	0.582724	0.168703	3.45413	0.000552071	0.0227909	ENSG00000168159	RNF187
8266	ENSG00000172663.9	1322.54	0.58224	0.184703	3.15231	0.00161986	0.045544	ENSG00000172663	TMEM134
1583	ENSG00000100241.21	11644.8	0.581398	0.188732	3.08055	0.00206616	0.053036	ENSG00000100241	SBF1
2643	ENSG00000110651.12	9741.32	0.581173	0.156401	3.71592	0.000202469	0.011915	ENSG00000110651	CD81
8825	ENSG00000179085.8	2156.99	0.580408	0.176806	3.28273	0.00102808	0.0340113	ENSG00000179085	DPM3
3649	ENSG00000123143.13	9904.88	0.580241	0.175358	3.30889	0.000936666	0.0323773	ENSG00000123143	PKN1
10549	ENSG00000225972.1	20542.7	0.579994	0.178091	3.25673	0.00112703	0.0361508	ENSG00000225972	MTND1P23
6802	ENSG00000160867.15	4378.81	0.578096	0.198161	2.9173	0.00353076	0.0737702	ENSG00000160867	FGFR4
2846	ENSG00000112787.13	7395.71	0.578	0.166791	3.46542	0.000529402	0.02241	ENSG00000112787	FBRSL1
1545	ENSG00000100065.15	2277.61	0.577948	0.180553	3.20098	0.00136961	0.0409337	ENSG00000100065	CARD10
5459	ENSG00000142409.6	1361.12	0.577334	0.186774	3.09108	0.00199429	0.0517289	ENSG00000142409	ZNF787
8750	ENSG00000178057.15	2202.34	0.577141	0.16719	3.45202	0.000556413	0.0227909	ENSG00000178057	NDUFAF3
8860	ENSG00000179526.17	1971.12	0.576996	0.190563	3.02785	0.00246297	0.0591684	ENSG00000179526	SHARPIN
8826	ENSG00000179091.5	4381.7	0.576057	0.173051	3.32882	0.000872135	0.0309377	ENSG00000179091	CYC1
1979	ENSG00000103326.12	3427.2	0.575552	0.189929	3.03035	0.00244269	0.0588054	ENSG00000103326	CAPN15
6841	ENSG00000161395.14	852.621	0.575537	0.221416	2.59935	0.00934013	0.138044	ENSG00000161395	PGAP3
1477	ENSG00000099203.7	1619.57	0.575528	0.191788	3.00086	0.0026922	0.0626913	ENSG00000099203	TMED1
6876	ENSG00000162062.15	1463.55	0.57341	0.187195	3.06317	0.00219005	0.0554179	ENSG00000162062	TEDC2
3184	ENSG00000116649.10	2811.37	0.573406	0.193568	2.96229	0.00305359	0.067386	ENSG00000116649	SRM
5337	ENSG00000140988.16	53112.9	0.572947	0.162806	3.5192	0.00043285	0.0195787	ENSG00000140988	RPS2
608	ENSG00000063660.9	4343.3	0.57279	0.168116	3.40712	0.000656531	0.0256025	ENSG00000063660	GPC1
3985	ENSG00000127554.13	1927.2	0.572643	0.166219	3.44511	0.000570832	0.0230499	ENSG00000127554	GFER
11277	ENSG00000278195.2	6069.71	0.572578	0.155851	3.67387	0.000238903	0.0129944	ENSG00000278195	SSTR3
32	ENSG00000004059.11	21822.4	0.572577	0.168596	3.39614	0.000683428	0.0261487	ENSG00000004059	ARF5
3052	ENSG00000115325.13	1019.75	0.572227	0.20385	2.8071	0.00499901	0.091224	ENSG00000115325	DOK1
8940	ENSG00000180900.20	8877.11	0.572217	0.208357	2.74633	0.00602655	0.103506	ENSG00000180900	SCRIB
1912	ENSG00000102890.16	1021.62	0.571565	0.193134	2.95943	0.00308209	0.0676219	ENSG00000102890	ELMO3
4950	ENSG00000137166.15	22289.6	0.571453	0.146563	3.89902	9.66e-05	0.00766223	ENSG00000137166	FOXP4
834	ENSG00000071655.18	8472.38	0.569698	0.212568	2.68007	0.00736068	0.118217	ENSG00000071655	MBD3
1786	ENSG00000101412.13	8600.01	0.569328	0.173466	3.28207	0.00103046	0.0340113	ENSG00000101412	E2F1
2992	ENSG00000114767.7	1017.12	0.569034	0.204103	2.78798	0.00530381	0.0949599	ENSG00000114767	RRP9
3819	ENSG00000125611.15	864.828	0.56901	0.197267	2.88447	0.00392069	0.0781736	ENSG00000125611	CHCHD5
10394	ENSG00000214026.11	2686.36	0.568608	0.180178	3.15581	0.00160051	0.0454435	ENSG00000214026	MRPL23
590	ENSG00000062582.14	2290.83	0.568434	0.17741	3.20408	0.00135497	0.0408834	ENSG00000062582	MRPS24
11082	ENSG00000265688.2	928.343	0.568258	0.195142	2.91202	0.00359103	0.074341	ENSG00000265688	MAFG-DT
604	ENSG00000063245.15	7908.34	0.567771	0.182876	3.10467	0.00190493	0.0506035	ENSG00000063245	EPN1
8270	ENSG00000172725.14	4872.98	0.567561	0.157844	3.5957	0.000323518	0.0159126	ENSG00000172725	CORO1B
4180	ENSG00000130313.7	4338.82	0.566271	0.194308	2.9143	0.0035649	0.0742112	ENSG00000130313	PGLS
10679	ENSG00000236824.2	1573.54	0.566035	0.197052	2.87252	0.00407218	0.0799481	ENSG00000236824	BCYRN1
10732	ENSG00000240972.2	17239.3	0.564463	0.151778	3.71901	0.000200007	0.0118831	ENSG00000240972	MIF
4293	ENSG00000131188.12	879.811	0.563756	0.190004	2.96708	0.00300645	0.0667338	ENSG00000131188	PRR7
8938	ENSG00000180879.14	10494.8	0.563459	0.157908	3.56827	0.000359343	0.0169786	ENSG00000180879	SSR4
3668	ENSG00000123395.14	2262.82	0.56307	0.196257	2.86905	0.00411712	0.0802767	ENSG00000123395	ATG101
4329	ENSG00000131652.14	1969.42	0.562515	0.197726	2.84492	0.00444222	0.0840257	ENSG00000131652	THOC6
8584	ENSG00000176108.9	707.878	0.561896	0.194849	2.88376	0.00392962	0.0781736	ENSG00000176108	CHMP6
10811	ENSG00000244731.8	1948.68	0.561525	0.16402	3.42351	0.000618171	0.0245265	ENSG00000244731	C4A
4291	ENSG00000131174.7	835.447	0.561501	0.190685	2.94464	0.00323327	0.0693357	ENSG00000131174	COX7B
10171	ENSG00000204308.8	2449.32	0.561347	0.161437	3.47718	0.000506712	0.0216915	ENSG00000204308	RNF5
6646	ENSG00000159069.14	9431.54	0.561317	0.173786	3.22993	0.00123821	0.0384183	ENSG00000159069	FBXW5
9282	ENSG00000184897.6	18325.4	0.561209	0.153151	3.66442	0.000247901	0.0131323	ENSG00000184897	H1-10
7392	ENSG00000165644.11	1366.17	0.560796	0.180648	3.10436	0.00190693	0.0506035	ENSG00000165644	COMTD1
10078	ENSG00000198858.10	3146.21	0.560627	0.186272	3.00972	0.00261488	0.0613932	ENSG00000198858	R3HDM4
7129	ENSG00000163888.4	1804.47	0.560125	0.200751	2.79014	0.00526854	0.0944769	ENSG00000163888	CAMK2N2
8146	ENSG00000171443.7	684.08	0.559914	0.199632	2.80473	0.00503586	0.0916212	ENSG00000171443	ZNF524
5365	ENSG00000141349.8	5460.77	0.558633	0.176872	3.15841	0.00158634	0.0452724	ENSG00000141349	G6PC3
10200	ENSG00000204498.11	2219.35	0.557878	0.201041	2.77495	0.00552102	0.0977727	ENSG00000204498	NFKBIL1
8409	ENSG00000174177.13	913.951	0.557733	0.190245	2.93166	0.00337155	0.0712279	ENSG00000174177	CTU2
6077	ENSG00000149932.17	2103.5	0.557403	0.18869	2.95406	0.0031362	0.0681726	ENSG00000149932	TMEM219
8113	ENSG00000171159.5	4788.67	0.557038	0.183586	3.03421	0.00241169	0.0582064	ENSG00000171159	C9orf16
6678	ENSG00000159423.17	1233.98	0.554963	0.179276	3.09557	0.00196432	0.0514201	ENSG00000159423	ALDH4A1
623	ENSG00000064545.15	2199.02	0.553531	0.183263	3.02042	0.00252427	0.0597585	ENSG00000064545	TMEM161A
9481	ENSG00000187051.9	3048.43	0.553343	0.176113	3.14197	0.00167815	0.0463812	ENSG00000187051	RPS19BP1
7954	ENSG00000169783.12	1055.42	0.552964	0.206658	2.67574	0.00745638	0.119417	ENSG00000169783	LINGO1
8775	ENSG00000178449.9	846.708	0.552668	0.182752	3.02413	0.00249346	0.0597585	ENSG00000178449	COX14
9453	ENSG00000186577.14	1579.05	0.552002	0.175532	3.14475	0.00166231	0.0460554	ENSG00000186577	SMIM29
8764	ENSG00000178209.15	6040.25	0.551453	0.179299	3.07561	0.00210071	0.053634	ENSG00000178209	PLEC
1547	ENSG00000100075.10	17069.8	0.551212	0.178969	3.07993	0.00207048	0.053036	ENSG00000100075	SLC25A1
5967	ENSG00000148362.11	2708.97	0.551073	0.180916	3.04601	0.00231903	0.0574431	ENSG00000148362	PAXX
8516	ENSG00000175274.19	3538.67	0.549159	0.157575	3.48506	0.000492026	0.0213459	ENSG00000175274	TP53I11
10626	ENSG00000233016.7	1544.04	0.547971	0.168836	3.24559	0.00117208	0.0368687	ENSG00000233016	SNHG7
3708	ENSG00000124140.14	616.272	0.54773	0.194815	2.81155	0.00493039	0.0901161	ENSG00000124140	SLC12A5
1841	ENSG00000101986.12	533.558	0.547654	0.202474	2.70482	0.00683421	0.113892	ENSG00000101986	ABCD1
7522	ENSG00000166482.12	3917.18	0.546826	0.180191	3.03471	0.00240771	0.0582064	ENSG00000166482	MFAP4
557	ENSG00000059122.17	1914.85	0.546677	0.192427	2.84096	0.0044978	0.0846949	ENSG00000059122	FLYWCH1
8541	ENSG00000175573.7	1269.22	0.546597	0.188277	2.90316	0.00369421	0.0757945	ENSG00000175573	C11orf68
7651	ENSG00000167513.9	4655.71	0.546172	0.163749	3.33543	0.000851679	0.0303065	ENSG00000167513	CDT1
10908	ENSG00000254402.7	1461.27	0.545607	0.200911	2.71567	0.0066142	0.111085	ENSG00000254402	LRRC24
10247	ENSG00000205155.8	1351.07	0.545361	0.198734	2.74418	0.00606626	0.103874	ENSG00000205155	PSENEN
8556	ENSG00000175756.13	3671.09	0.545045	0.177424	3.07199	0.0021264	0.0541685	ENSG00000175756	AURKAIP1
1057	ENSG00000080189.15	8429.1	0.54499	0.173028	3.14972	0.00163429	0.0457241	ENSG00000080189	SLC35C2
8713	ENSG00000177674.16	1035.96	0.544205	0.189561	2.87087	0.0040935	0.0800904	ENSG00000177674	AGTRAP
7439	ENSG00000165948.11	606.297	0.543531	0.210072	2.58735	0.00967169	0.140653	ENSG00000165948	IFI27L1
7763	ENSG00000168237.18	3183.36	0.543039	0.192938	2.81459	0.004884	0.0895557	ENSG00000168237	GLYCTK
3700	ENSG00000123989.14	14120.4	0.542559	0.181068	2.99644	0.0027315	0.063242	ENSG00000123989	CHPF
9307	ENSG00000185085.2	2334.71	0.542488	0.195015	2.78177	0.00540628	0.096491	ENSG00000185085	INTS5
1493	ENSG00000099385.11	1133.66	0.542175	0.182266	2.97464	0.00293333	0.0658814	ENSG00000099385	BCL7C
4337	ENSG00000131747.15	5595.08	0.541881	0.152191	3.56053	0.000370112	0.0172724	ENSG00000131747	TOP2A
1526	ENSG00000099960.13	929.495	0.54159	0.183632	2.94932	0.00318479	0.0689453	ENSG00000099960	SLC7A4
4171	ENSG00000130255.13	6535.53	0.541397	0.145218	3.72817	0.000192878	0.0118081	ENSG00000130255	RPL36
3392	ENSG00000119431.9	1014.49	0.541286	0.201795	2.68235	0.0073107	0.117884	ENSG00000119431	HDHD3
500	ENSG00000054148.18	3049.85	0.541276	0.159396	3.39579	0.000684316	0.0261487	ENSG00000054148	PHPT1
7641	ENSG00000167397.15	4108.28	0.54122	0.163884	3.30246	0.000958417	0.0328634	ENSG00000167397	VKORC1
9972	ENSG00000198355.5	959.567	0.541065	0.192412	2.81202	0.00492315	0.0901161	ENSG00000198355	PIM3
7585	ENSG00000166963.13	874.342	0.540269	0.188163	2.87128	0.00408808	0.0800904	ENSG00000166963	MAP1A
3403	ENSG00000119574.13	1046.48	0.540227	0.181763	2.97215	0.00295721	0.0661509	ENSG00000119574	ZBTB45
2445	ENSG00000108107.15	20249.8	0.539713	0.154626	3.49045	0.00048221	0.0211706	ENSG00000108107	RPL28
4281	ENSG00000131094.4	11531.6	0.539416	0.149072	3.6185	0.000296314	0.0150437	ENSG00000131094	C1QL1
8475	ENSG00000174903.16	11108	0.538671	0.17406	3.09475	0.00196982	0.0514458	ENSG00000174903	RAB1B
7818	ENSG00000168701.19	2017.25	0.538457	0.179206	3.00468	0.00265863	0.062164	ENSG00000168701	TMEM208
7292	ENSG00000164897.14	4406.42	0.53771	0.189075	2.8439	0.00445646	0.0841555	ENSG00000164897	TMUB1
2191	ENSG00000105429.13	3921.25	0.537405	0.186072	2.88816	0.00387504	0.0777232	ENSG00000105429	MEGF8
4502	ENSG00000133265.11	2965.84	0.536542	0.192639	2.78521	0.00534928	0.0956236	ENSG00000133265	HSPBP1
5960	ENSG00000148335.15	928.006	0.536534	0.180999	2.9643	0.00303377	0.0670787	ENSG00000148335	NTMT1
10738	ENSG00000241360.2	4794.83	0.536433	0.182553	2.93851	0.00329796	0.0700398	ENSG00000241360	PDXP
6064	ENSG00000149761.9	1164.36	0.535985	0.18819	2.84811	0.00439803	0.0836066	ENSG00000149761	NUDT22
10846	ENSG00000248487.9	2072.99	0.535387	0.16115	3.3223	0.000892785	0.0312804	ENSG00000248487	ABHD14A
7606	ENSG00000167123.19	1855.5	0.535347	0.178668	2.99633	0.00273251	0.063242	ENSG00000167123	CERCAM
7337	ENSG00000165215.6	5473.85	0.53421	0.157832	3.38467	0.00071263	0.0265999	ENSG00000165215	CLDN3
6621	ENSG00000158716.9	3037.12	0.534195	0.162655	3.28423	0.00102262	0.0339506	ENSG00000158716	DUSP23
8629	ENSG00000176715.17	1091.64	0.533247	0.175718	3.03468	0.00240791	0.0582064	ENSG00000176715	ACSF3
10591	ENSG00000229809.8	828.375	0.532858	0.192772	2.76418	0.00570659	0.0993592	ENSG00000229809	ZNF688
6068	ENSG00000149806.11	8837.4	0.532629	0.16312	3.26526	0.00109362	0.0354043	ENSG00000149806	FAU
7742	ENSG00000168056.16	1060.33	0.532433	0.19912	2.67393	0.00749679	0.119896	ENSG00000168056	LTBP3
7265	ENSG00000164638.10	10613.9	0.532099	0.165516	3.21479	0.0013054	0.0398514	ENSG00000164638	SLC29A4
6136	ENSG00000151366.13	1705.51	0.531737	0.175985	3.02149	0.00251533	0.0597585	ENSG00000151366	NDUFC2
4045	ENSG00000128564.7	9273.35	0.531385	0.154531	3.4387	0.00058452	0.0234364	ENSG00000128564	VGF
10574	ENSG00000228253.1	13247.1	0.531283	0.17394	3.0544	0.00225514	0.0565623	ENSG00000228253	MT-ATP8
10378	ENSG00000213859.6	748.011	0.530781	0.189867	2.79555	0.00518119	0.0933516	ENSG00000213859	KCTD11
8815	ENSG00000178980.15	2024.29	0.530305	0.163764	3.23823	0.00120276	0.0374202	ENSG00000178980	SELENOW
10162	ENSG00000204228.4	569.083	0.52991	0.192528	2.75238	0.00591637	0.102386	ENSG00000204228	HSD17B8
8690	ENSG00000177427.13	622.817	0.529303	0.195167	2.71205	0.00668691	0.111648	ENSG00000177427	MIEF2
1997	ENSG00000103495.14	25773.7	0.529233	0.183543	2.88343	0.00393374	0.0781736	ENSG00000103495	MAZ
10320	ENSG00000213015.9	1830.32	0.529092	0.171263	3.08936	0.00200591	0.051912	ENSG00000213015	ZNF580
6756	ENSG00000160326.14	4534.8	0.528294	0.160007	3.30169	0.000961054	0.0328634	ENSG00000160326	SLC2A6
6659	ENSG00000159199.14	2085.33	0.527888	0.1766	2.98917	0.00279736	0.0640916	ENSG00000159199	ATP5MC1
6861	ENSG00000161888.11	737.014	0.527779	0.195372	2.70141	0.0069046	0.114111	ENSG00000161888	SPC24
3988	ENSG00000127580.17	1790.68	0.527659	0.186448	2.83007	0.00465385	0.0870171	ENSG00000127580	WDR24
10709	ENSG00000239779.7	2730.05	0.527089	0.190633	2.76494	0.00569327	0.0993592	ENSG00000239779	WBP1
5395	ENSG00000141552.17	3639.26	0.527024	0.182188	2.89275	0.00381884	0.0775136	ENSG00000141552	ANAPC11
4023	ENSG00000128165.9	1311.45	0.526705	0.168051	3.13419	0.00172326	0.0471702	ENSG00000128165	ADM2
10404	ENSG00000214160.10	3849	0.526328	0.167333	3.14538	0.00165869	0.0460554	ENSG00000214160	ALG3
8254	ENSG00000172478.18	11240	0.526139	0.143582	3.66437	0.000247953	0.0131323	ENSG00000172478	MAB21L4
5446	ENSG00000142185.16	1856.23	0.524985	0.169747	3.09275	0.00198314	0.0515751	ENSG00000142185	TRPM2
1314	ENSG00000089486.17	4207.34	0.524536	0.16143	3.2493	0.00115688	0.0365929	ENSG00000089486	CDIP1
9614	ENSG00000188986.8	4666.9	0.524314	0.182489	2.87313	0.0040643	0.0799313	ENSG00000188986	NELFB
3484	ENSG00000120645.12	2613.06	0.524081	0.164816	3.17979	0.00147384	0.0431429	ENSG00000120645	IQSEC3
512	ENSG00000054967.13	1023.31	0.523088	0.192829	2.7127	0.00667366	0.11159	ENSG00000054967	RELT
8340	ENSG00000173457.11	4871.24	0.522919	0.188373	2.77597	0.00550365	0.0976236	ENSG00000173457	PPP1R14B
8471	ENSG00000174851.16	4599.94	0.522411	0.188875	2.76591	0.00567644	0.0993592	ENSG00000174851	YIF1A
6439	ENSG00000156113.24	1557.38	0.522068	0.172054	3.03433	0.00241068	0.0582064	ENSG00000156113	KCNMA1
10658	ENSG00000235173.7	1593.76	0.521735	0.180812	2.88551	0.00390775	0.0780739	ENSG00000235173	HGH1
5006	ENSG00000137700.18	10214	0.519172	0.170625	3.04277	0.00234415	0.057902	ENSG00000137700	SLC37A4
8540	ENSG00000175567.10	4690.16	0.518028	0.177353	2.92089	0.0034903	0.0736001	ENSG00000175567	UCP2
2217	ENSG00000105640.13	22668.5	0.517505	0.160854	3.21722	0.00129437	0.039621	ENSG00000105640	RPL18A
3840	ENSG00000125744.12	3152.18	0.5169	0.198963	2.59797	0.00937778	0.138322	ENSG00000125744	RTN2
4231	ENSG00000130726.12	21166.8	0.516285	0.153367	3.36634	0.000761717	0.0279036	ENSG00000130726	TRIM28
6808	ENSG00000160949.17	1355.39	0.515456	0.178412	2.88913	0.00386309	0.0777232	ENSG00000160949	TONSL
10313	ENSG00000211584.14	1074.79	0.515157	0.170541	3.02073	0.00252169	0.0597585	ENSG00000211584	SLC48A1
5210	ENSG00000139546.11	1282.6	0.515125	0.187442	2.74818	0.00599278	0.103081	ENSG00000139546	TARBP2
5031	ENSG00000137868.19	8534.21	0.514912	0.142838	3.60485	0.00031233	0.0155987	ENSG00000137868	STRA6
4042	ENSG00000128524.5	4713.02	0.51469	0.159518	3.22653	0.001253	0.0387714	ENSG00000128524	ATP6V1F
6072	ENSG00000149925.22	19049.7	0.514579	0.175257	2.93614	0.00332329	0.0703388	ENSG00000149925	ALDOA
3694	ENSG00000123815.12	2309.17	0.514493	0.173138	2.97158	0.00296276	0.0661509	ENSG00000123815	COQ8B
4711	ENSG00000135390.21	6581.72	0.514023	0.17016	3.02081	0.00252098	0.0597585	ENSG00000135390	ATP5MC2
7032	ENSG00000163382.12	7136.04	0.513894	0.164883	3.11673	0.00182869	0.0492278	ENSG00000163382	NAXE
3555	ENSG00000121653.11	9782.16	0.513529	0.148633	3.45502	0.000550246	0.0227909	ENSG00000121653	MAPK8IP1
4230	ENSG00000130725.8	4548.55	0.513334	0.169122	3.03528	0.00240312	0.0582064	ENSG00000130725	UBE2M
10350	ENSG00000213465.8	3109.12	0.513251	0.19373	2.6493	0.00806581	0.125988	ENSG00000213465	ARL2
7431	ENSG00000165905.18	2373.35	0.513217	0.195366	2.62695	0.00861545	0.131422	ENSG00000165905	LARGE2
7025	ENSG00000163344.6	2110.91	0.513004	0.182914	2.80461	0.00503771	0.0916212	ENSG00000163344	PMVK
8581	ENSG00000176101.12	2660.55	0.512745	0.173536	2.95468	0.00312989	0.0681726	ENSG00000176101	SSNA1
8844	ENSG00000179292.5	1658.92	0.512381	0.188857	2.71307	0.00666629	0.11159	ENSG00000179292	TMEM151A
3976	ENSG00000127445.14	4577.63	0.511884	0.17122	2.98962	0.00279321	0.0640916	ENSG00000127445	PIN1
11014	ENSG00000260293.2	2490.78	0.511765	0.161664	3.1656	0.00154763	0.044728	ENSG00000260293	AC106820.4
4846	ENSG00000136425.14	978.267	0.511134	0.173067	2.95338	0.00314311	0.0681726	ENSG00000136425	CIB2
8177	ENSG00000171703.17	1783.37	0.510893	0.177704	2.87496	0.00404073	0.0797431	ENSG00000171703	TCEA2
6950	ENSG00000162729.14	3712.42	0.510699	0.196847	2.59439	0.00947589	0.13895	ENSG00000162729	IGSF8
8881	ENSG00000179921.15	1915.75	0.510552	0.170627	2.9922	0.00276972	0.0638438	ENSG00000179921	GPBAR1
3309	ENSG00000117984.14	25421.9	0.510057	0.164277	3.10486	0.0019037	0.0506035	ENSG00000117984	CTSD
6397	ENSG00000155366.17	1233.86	0.509837	0.187185	2.7237	0.00645547	0.10874	ENSG00000155366	RHOC
11317	ENSG00000280987.4	722.841	0.509832	0.188682	2.70207	0.00689093	0.114111	ENSG00000280987	MATR3
1800	ENSG00000101473.17	2292.83	0.509437	0.176398	2.888	0.00387695	0.0777232	ENSG00000101473	ACOT8
5682	ENSG00000144579.7	3597.64	0.509317	0.165383	3.07962	0.00207263	0.053036	ENSG00000144579	CTDSP1
7712	ENSG00000167900.12	1310.71	0.508996	0.192235	2.64778	0.00810221	0.12621	ENSG00000167900	TK1
157	ENSG00000008735.14	6906.32	0.508103	0.181623	2.79756	0.00514895	0.0930653	ENSG00000008735	MAPK8IP2
9351	ENSG00000185475.11	2313.45	0.507995	0.194568	2.61088	0.00903092	0.134954	ENSG00000185475	TMEM179B
10872	ENSG00000250479.9	1598.6	0.507694	0.176221	2.88101	0.00396408	0.0785025	ENSG00000250479	CHCHD10
2731	ENSG00000111678.11	4785.02	0.506542	0.193538	2.61727	0.00886354	0.133681	ENSG00000111678	C12orf57
9911	ENSG00000197956.10	6635.39	0.506396	0.144545	3.50337	0.000459412	0.0203554	ENSG00000197956	S100A6
7855	ENSG00000168936.11	2593.14	0.506226	0.177202	2.85677	0.00427978	0.0823207	ENSG00000168936	TMEM129
10408	ENSG00000214253.9	2322.96	0.505034	0.16798	3.00652	0.00264258	0.0619158	ENSG00000214253	FIS1
9530	ENSG00000187838.17	1137.2	0.504922	0.193525	2.60908	0.0090786	0.135489	ENSG00000187838	PLSCR3
7495	ENSG00000166337.10	2070.16	0.503331	0.176362	2.85397	0.00431768	0.0824923	ENSG00000166337	TAF10
5029	ENSG00000137843.12	687.873	0.503313	0.190356	2.64407	0.00819161	0.127255	ENSG00000137843	PAK6
3380	ENSG00000119333.11	7681.12	0.503272	0.182462	2.75822	0.00581163	0.101034	ENSG00000119333	WDR34
4143	ENSG00000129946.10	2619.97	0.502911	0.19232	2.61497	0.00892347	0.134092	ENSG00000129946	SHC2
565	ENSG00000059915.17	1904.97	0.502172	0.182159	2.75677	0.00583746	0.101174	ENSG00000059915	PSD
293	ENSG00000023191.17	4768.59	0.502077	0.175298	2.86413	0.0041816	0.0811173	ENSG00000023191	RNH1
3818	ENSG00000125534.10	20541	0.500797	0.142315	3.51893	0.000433285	0.0195787	ENSG00000125534	PPDPF
10419	ENSG00000214530.9	28696	0.500739	0.153583	3.26037	0.00111266	0.0357906	ENSG00000214530	STARD10
10983	ENSG00000258947.7	3657.77	0.500317	0.169136	2.95807	0.0030957	0.0677898	ENSG00000258947	TUBB3
9448	ENSG00000186501.14	2546.26	0.499752	0.187515	2.66513	0.00769593	0.122393	ENSG00000186501	TMEM222
4159	ENSG00000130165.10	2022.31	0.499576	0.17496	2.85537	0.00429869	0.082406	ENSG00000130165	ELOF1
7720	ENSG00000167965.18	5146.96	0.49933	0.167529	2.98056	0.00287719	0.0651343	ENSG00000167965	MLST8
8361	ENSG00000173638.19	665.203	0.498767	0.185409	2.69009	0.00714334	0.116702	ENSG00000173638	SLC19A1
1587	ENSG00000100258.18	10193.4	0.498671	0.173502	2.87414	0.00405124	0.0798121	ENSG00000100258	LMF2
9779	ENSG00000196924.18	2732.07	0.498512	0.172531	2.8894	0.00385978	0.0777232	ENSG00000196924	FLNA
2194	ENSG00000105447.13	2083.87	0.497732	0.191385	2.60069	0.00930375	0.137945	ENSG00000105447	GRWD1
3024	ENSG00000115138.11	1665.37	0.497254	0.181664	2.73722	0.006196	0.105458	ENSG00000115138	POMC
9962	ENSG00000198258.11	1741.76	0.495388	0.16394	3.02176	0.00251306	0.0597585	ENSG00000198258	UBL5
9003	ENSG00000181885.18	7641.05	0.49497	0.169634	2.91786	0.0035244	0.0737702	ENSG00000181885	CLDN7
4290	ENSG00000131165.16	5519.53	0.494196	0.177761	2.78011	0.00543402	0.0968344	ENSG00000131165	CHMP1A
7893	ENSG00000169221.14	6516.57	0.493989	0.185831	2.65827	0.00785425	0.123531	ENSG00000169221	TBC1D10B
5469	ENSG00000142546.14	2305.59	0.493549	0.17075	2.89048	0.00384652	0.0777232	ENSG00000142546	NOSIP
1528	ENSG00000099977.14	2056.95	0.492259	0.164753	2.98786	0.00280936	0.0642372	ENSG00000099977	DDT
1350	ENSG00000090661.12	931.44	0.492107	0.177211	2.77696	0.005487	0.0976236	ENSG00000090661	CERS4
9804	ENSG00000197070.14	2020.38	0.49184	0.155003	3.1731	0.00150822	0.0439235	ENSG00000197070	ARRDC1
7169	ENSG00000164054.15	8035.61	0.490734	0.153647	3.1939	0.00140366	0.0417322	ENSG00000164054	SHISA5
3251	ENSG00000117362.13	10148.2	0.489442	0.178681	2.73919	0.00615904	0.10499	ENSG00000117362	APH1A
70	ENSG00000005448.17	1111.11	0.487998	0.185783	2.62671	0.00862142	0.131422	ENSG00000005448	WDR54
4216	ENSG00000130669.17	4713.04	0.487971	0.174533	2.79586	0.00517618	0.0933516	ENSG00000130669	PAK4
9063	ENSG00000182544.9	1395.34	0.487864	0.177345	2.75093	0.00594261	0.102684	ENSG00000182544	MFSD5
3211	ENSG00000116863.11	1491.18	0.486135	0.18966	2.5632	0.0103713	0.147623	ENSG00000116863	ADPRS
1798	ENSG00000101460.13	2084.41	0.48542	0.171664	2.82773	0.004688	0.0870436	ENSG00000101460	MAP1LC3A
1288	ENSG00000088992.18	1317.06	0.484257	0.165907	2.91884	0.00351332	0.0737702	ENSG00000088992	TESC
2143	ENSG00000105135.16	3975.55	0.484082	0.174722	2.77058	0.00559567	0.0984821	ENSG00000105135	ILVBL
2221	ENSG00000105655.19	4027.48	0.483995	0.162673	2.97526	0.00292741	0.0658783	ENSG00000105655	ISYNA1
4899	ENSG00000136840.19	851.094	0.483434	0.183962	2.62791	0.00859114	0.131404	ENSG00000136840	ST6GALNAC4
5930	ENSG00000147889.17	4739.14	0.48281	0.161868	2.98274	0.00285684	0.0648316	ENSG00000147889	CDKN2A
8876	ENSG00000179886.6	1570.7	0.481676	0.188473	2.55568	0.010598	0.149356	ENSG00000179886	TIGD5
6106	ENSG00000150967.18	1007.65	0.48165	0.187187	2.5731	0.0100793	0.144915	ENSG00000150967	ABCB9
8807	ENSG00000178927.18	2975.71	0.481511	0.169229	2.84532	0.00443669	0.0840257	ENSG00000178927	CYBC1
8307	ENSG00000173113.7	3926.23	0.481246	0.162582	2.96002	0.00307622	0.0676219	ENSG00000173113	TRMT112
2237	ENSG00000105732.13	1118.92	0.48047	0.178935	2.68517	0.00724928	0.117422	ENSG00000105732	ZNF574
8013	ENSG00000170291.15	1877.14	0.480184	0.18158	2.64448	0.00818168	0.127255	ENSG00000170291	ELP5
7605	ENSG00000167118.11	2565.58	0.480018	0.178161	2.6943	0.00705365	0.115735	ENSG00000167118	URM1
10308	ENSG00000211450.10	1959.48	0.47949	0.174435	2.74882	0.00598111	0.103036	ENSG00000211450	SELENOH
4915	ENSG00000136908.18	3177.68	0.479424	0.167741	2.85813	0.00426149	0.0821076	ENSG00000136908	DPM2
9573	ENSG00000188486.3	4408.07	0.476994	0.174717	2.7301	0.00633143	0.107446	ENSG00000188486	H2AX
1994	ENSG00000103485.19	3975.73	0.476762	0.146974	3.24386	0.00117924	0.0369916	ENSG00000103485	QPRT
8124	ENSG00000171223.6	3596.77	0.476413	0.163966	2.90557	0.0036659	0.0756224	ENSG00000171223	JUNB
9190	ENSG00000183798.5	1093.38	0.475943	0.181038	2.62896	0.00856455	0.131404	ENSG00000183798	EMILIN3
1510	ENSG00000099834.19	2652.66	0.475649	0.155362	3.06156	0.00220185	0.0555931	ENSG00000099834	CDHR5
849	ENSG00000072195.15	2870.83	0.474344	0.176864	2.68196	0.0073192	0.117884	ENSG00000072195	SPEG
2648	ENSG00000110711.10	2937.87	0.473539	0.176094	2.68913	0.00716375	0.116868	ENSG00000110711	AIP
2230	ENSG00000105699.16	5182.73	0.473309	0.180098	2.62806	0.0085873	0.131404	ENSG00000105699	LSR
4197	ENSG00000130511.16	3357.69	0.473264	0.163262	2.8988	0.00374599	0.0764438	ENSG00000130511	SSBP4
6674	ENSG00000159363.19	5708.45	0.473011	0.18435	2.56584	0.0102927	0.147054	ENSG00000159363	ATP13A2
4140	ENSG00000129925.11	11410.2	0.472958	0.158752	2.97922	0.00288984	0.0652909	ENSG00000129925	PGAP6
1999	ENSG00000103502.14	4131.92	0.472892	0.178213	2.65353	0.00796558	0.124765	ENSG00000103502	CDIPT
9898	ENSG00000197858.11	14116.9	0.471632	0.169899	2.77595	0.00550403	0.0976236	ENSG00000197858	GPAA1
8712	ENSG00000177666.17	2202.1	0.47088	0.178835	2.63305	0.00846222	0.130392	ENSG00000177666	PNPLA2
4742	ENSG00000135617.4	1215.7	0.470251	0.183001	2.56966	0.0101798	0.145992	ENSG00000135617	PRADC1
970	ENSG00000076826.10	6934.49	0.469435	0.165653	2.83385	0.00459909	0.0862765	ENSG00000076826	CAMSAP3
6882	ENSG00000162073.14	6109.16	0.466494	0.160632	2.90411	0.00368296	0.0757002	ENSG00000162073	PAQR4
4201	ENSG00000130522.6	19632.3	0.464802	0.164377	2.82766	0.00468892	0.0870436	ENSG00000130522	JUND
461	ENSG00000049759.19	845.603	0.462816	0.179284	2.58147	0.00983815	0.142166	ENSG00000049759	NEDD4L
6720	ENSG00000160113.5	3998.75	0.462606	0.163412	2.83092	0.00464138	0.0869266	ENSG00000160113	NR2F6
7804	ENSG00000168528.12	3630.81	0.462143	0.158732	2.91148	0.00359725	0.074341	ENSG00000168528	SERINC2
1925	ENSG00000102977.17	1987.97	0.460952	0.171313	2.69069	0.00713035	0.116657	ENSG00000102977	ACD
2836	ENSG00000112695.11	1592.04	0.459592	0.167447	2.7447	0.0060567	0.103867	ENSG00000112695	COX7A2
2377	ENSG00000107331.17	6395.33	0.459441	0.146576	3.13449	0.00172155	0.0471702	ENSG00000107331	ABCA2
1950	ENSG00000103145.11	1981	0.45879	0.176519	2.5991	0.00934678	0.138044	ENSG00000103145	HCFC1R1
8848	ENSG00000179314.14	2167.49	0.457945	0.170471	2.68635	0.00722363	0.11734	ENSG00000179314	WSCD1
1336	ENSG00000090266.13	2256.43	0.457912	0.158214	2.89426	0.00380051	0.0772887	ENSG00000090266	NDUFB2
6927	ENSG00000162545.6	4632.85	0.45731	0.154822	2.95378	0.00313903	0.0681726	ENSG00000162545	CAMK2N1
10475	ENSG00000219200.11	7147.58	0.455483	0.169792	2.68259	0.00730538	0.117884	ENSG00000219200	RNASEK
1228	ENSG00000087088.20	2886.74	0.453767	0.175991	2.57836	0.00992711	0.143089	ENSG00000087088	BAX
3164	ENSG00000116396.15	1124.63	0.453493	0.170267	2.66342	0.0077351	0.122598	ENSG00000116396	KCNC4
8231	ENSG00000172270.20	22500.8	0.453424	0.148545	3.05244	0.00226988	0.0568067	ENSG00000172270	BSG
8424	ENSG00000174365.20	1129.22	0.453042	0.176476	2.56717	0.0102533	0.146677	ENSG00000174365	SNHG11
8664	ENSG00000177106.16	1942.45	0.451315	0.172731	2.61283	0.00897969	0.134542	ENSG00000177106	EPS8L2
4157	ENSG00000130159.14	2595.86	0.449097	0.171854	2.61326	0.00896838	0.134542	ENSG00000130159	ECSIT
10174	ENSG00000204316.13	2798.15	0.448563	0.174869	2.56513	0.0103136	0.147169	ENSG00000204316	MRPL38
6790	ENSG00000160753.16	3427.5	0.448058	0.172528	2.59702	0.00940368	0.138525	ENSG00000160753	RUSC1
73	ENSG00000005486.17	8558.87	0.448036	0.159972	2.80071	0.00509899	0.0923088	ENSG00000005486	RHBDD2
9629	ENSG00000189159.16	1737.96	0.446994	0.158057	2.82806	0.00468311	0.0870436	ENSG00000189159	JPT1
6971	ENSG00000162882.15	1530.74	0.443972	0.166796	2.66177	0.00777318	0.122935	ENSG00000162882	HAAO
8974	ENSG00000181396.13	1646.79	0.443765	0.162845	2.72507	0.00642869	0.10845	ENSG00000181396	OGFOD3
10027	ENSG00000198715.13	4965.27	0.442903	0.173229	2.55676	0.0105654	0.14908	ENSG00000198715	GLMP
5427	ENSG00000141858.12	3247.75	0.442629	0.172944	2.55938	0.010486	0.148698	ENSG00000141858	SAMD1
5421	ENSG00000141741.12	1665.56	0.442153	0.1689	2.61783	0.008849	0.133639	ENSG00000141741	MIEN1
2430	ENSG00000107954.10	5529.92	0.439269	0.162494	2.70329	0.00686565	0.113964	ENSG00000107954	NEURL1
8794	ENSG00000178719.17	8345.68	0.437574	0.163425	2.67752	0.00741697	0.118954	ENSG00000178719	GRINA
733	ENSG00000068001.14	2728.66	0.437402	0.164746	2.655	0.00793074	0.12439	ENSG00000068001	HYAL2
8194	ENSG00000171858.18	5552.89	0.433818	0.160436	2.70399	0.00685131	0.113892	ENSG00000171858	RPS21
967	ENSG00000076604.15	5262.45	0.433775	0.165295	2.62425	0.00868404	0.132023	ENSG00000076604	TRAF4
3989	ENSG00000127585.12	3693.29	0.432275	0.166763	2.59216	0.00953758	0.139415	ENSG00000127585	FBXL16
3697	ENSG00000123933.17	3807.76	0.431845	0.163055	2.64846	0.00808585	0.126128	ENSG00000123933	MXD4
2611	ENSG00000110076.19	2322.31	0.430297	0.166382	2.5862	0.00970419	0.140766	ENSG00000110076	NRXN2
5764	ENSG00000145592.14	4875.77	0.426872	0.154041	2.77116	0.00558569	0.0984769	ENSG00000145592	RPL37
2227	ENSG00000105677.12	3191.7	0.425518	0.164055	2.59375	0.00949356	0.13895	ENSG00000105677	TMEM147
8793	ENSG00000178718.7	4118.16	0.424882	0.155834	2.7265	0.00640095	0.108142	ENSG00000178718	RPP25
1975	ENSG00000103266.11	4660.91	0.424288	0.159318	2.66316	0.00774109	0.122598	ENSG00000103266	STUB1
3667	ENSG00000123384.14	4426.53	0.423514	0.161363	2.6246	0.00867518	0.132023	ENSG00000123384	LRP1
25	ENSG00000003249.14	1938.8	0.422212	0.164833	2.56145	0.0104237	0.148183	ENSG00000003249	DBNDD1
7633	ENSG00000167363.14	1379.42	0.421337	0.162343	2.59535	0.00944953	0.138841	ENSG00000167363	FN3K
7880	ENSG00000169136.12	10740.6	0.418761	0.152853	2.73964	0.00615068	0.10499	ENSG00000169136	ATF5
10265	ENSG00000205476.9	2846.65	0.416885	0.15202	2.7423	0.00610109	0.104314	ENSG00000205476	CCDC85C
5261	ENSG00000140264.20	8620.14	0.414825	0.149584	2.77318	0.00555111	0.098153	ENSG00000140264	SERF2
4971	ENSG00000137309.20	12466.9	0.414222	0.160249	2.58487	0.00974162	0.14113	ENSG00000137309	HMGA1
7980	ENSG00000169976.7	7774.47	0.413654	0.159941	2.5863	0.00970134	0.140766	ENSG00000169976	SF3B5
161	ENSG00000008952.17	2948.53	0.41105	0.150641	2.72868	0.00635888	0.107751	ENSG00000008952	SEC62
354	ENSG00000034510.6	6024.41	0.410697	0.160213	2.56345	0.0103638	0.147623	ENSG00000034510	TMSB10
8279	ENSG00000172809.13	3954.59	0.410353	0.154328	2.65896	0.00783815	0.123531	ENSG00000172809	RPL38
5305	ENSG00000140564.12	11808	0.409678	0.149695	2.73674	0.00620505	0.105458	ENSG00000140564	FURIN
8697	ENSG00000177542.11	2809.54	0.408136	0.157341	2.59395	0.00948792	0.13895	ENSG00000177542	SLC25A22
5433	ENSG00000141959.17	6232.81	0.403109	0.15107	2.66837	0.00762201	0.121557	ENSG00000141959	PFKL
7824	ENSG00000168763.16	5065.72	0.401994	0.155256	2.58923	0.00961905	0.140246	ENSG00000168763	CNNM3
2161	ENSG00000105254.12	6009.07	0.401152	0.144763	2.7711	0.00558673	0.0984769	ENSG00000105254	TBCB
2204	ENSG00000105552.15	4453.87	0.390707	0.151799	2.57384	0.0100577	0.144788	ENSG00000105552	BCAT2
10038	ENSG00000198736.11	4631.06	0.390216	0.14529	2.68578	0.00723614	0.117376	ENSG00000198736	MSRB1
6635	ENSG00000158856.18	10379	0.374087	0.14453	2.58831	0.00964481	0.140442	ENSG00000158856	DMTN
2151	ENSG00000105193.9	16932.1	0.372132	0.145309	2.56096	0.0104382	0.148204	ENSG00000105193	RPS16
3038	ENSG00000115268.10	9895.63	0.363501	0.142125	2.55762	0.0105392	0.148896	ENSG00000115268	RPS15
6105	ENSG00000150961.15	3992.5	-0.378491	0.146729	-2.57952	0.00989375	0.142789	ENSG00000150961	SEC24D
8189	ENSG00000171824.14	2862.74	-0.393351	0.151025	-2.60454	0.00919989	0.13694	ENSG00000171824	EXOSC10
1768	ENSG00000101290.14	2546.67	-0.402235	0.155251	-2.59086	0.00957352	0.139761	ENSG00000101290	CDS2
314	ENSG00000025800.14	3072.35	-0.411946	0.148979	-2.76512	0.00569017	0.0993592	ENSG00000025800	KPNA6
6471	ENSG00000156599.11	1925.27	-0.4158	0.157995	-2.63173	0.00849522	0.130723	ENSG00000156599	ZDHHC5
3695	ENSG00000123836.15	3392.79	-0.417815	0.159492	-2.61966	0.00880187	0.13328	ENSG00000123836	PFKFB2
5576	ENSG00000143515.18	2155.08	-0.41831	0.160933	-2.59927	0.00934219	0.138044	ENSG00000143515	ATP8B2
10001	ENSG00000198561.15	3062.74	-0.419781	0.148995	-2.81743	0.00484103	0.0889109	ENSG00000198561	CTNND1
5772	ENSG00000145730.20	4263.3	-0.420457	0.160487	-2.61988	0.00879604	0.13328	ENSG00000145730	PAM
4167	ENSG00000130226.17	4167.72	-0.423251	0.15743	-2.6885	0.00717743	0.116923	ENSG00000130226	DPP6
3688	ENSG00000123643.13	1313.89	-0.425166	0.163285	-2.60382	0.00921898	0.137045	ENSG00000123643	SLC36A1
8265	ENSG00000172661.19	1442.76	-0.429144	0.164343	-2.61127	0.0090206	0.134954	ENSG00000172661	WASHC2C
6555	ENSG00000157823.17	1305.89	-0.431366	0.164967	-2.61487	0.00892614	0.134092	ENSG00000157823	AP3S2
7399	ENSG00000165671.21	2636.66	-0.434674	0.161292	-2.69496	0.00703978	0.115674	ENSG00000165671	NSD1
3754	ENSG00000124571.18	1960.05	-0.435227	0.155344	-2.8017	0.00508345	0.0921741	ENSG00000124571	XPO5
10015	ENSG00000198663.17	2125.91	-0.437119	0.167973	-2.60232	0.00925953	0.137468	ENSG00000198663	C6orf89
7582	ENSG00000166938.13	1343.81	-0.450918	0.167106	-2.6984	0.00696747	0.114817	ENSG00000166938	DIS3L
1348	ENSG00000090615.15	2925.32	-0.453803	0.152457	-2.97659	0.00291471	0.0657224	ENSG00000090615	GOLGA3
2465	ENSG00000108389.9	1787.77	-0.455026	0.159524	-2.85239	0.00433913	0.0827633	ENSG00000108389	MTMR4
2013	ENSG00000103657.14	1849.73	-0.456328	0.164757	-2.7697	0.00561071	0.0985945	ENSG00000103657	HERC1
9367	ENSG00000185591.10	1595.1	-0.458262	0.165772	-2.76441	0.00570258	0.0993592	ENSG00000185591	SP1
1022	ENSG00000078699.22	4346.05	-0.458409	0.158137	-2.8988	0.00374592	0.0764438	ENSG00000078699	CBFA2T2
5298	ENSG00000140526.18	4339.79	-0.459051	0.148741	-3.08625	0.00202695	0.0522192	ENSG00000140526	ABHD2
473	ENSG00000050438.17	1709.58	-0.460773	0.174688	-2.6377	0.00834709	0.129142	ENSG00000050438	SLC4A8
8645	ENSG00000176953.12	2001.33	-0.461524	0.163533	-2.8222	0.00476948	0.0883091	ENSG00000176953	NFATC2IP
371	ENSG00000036828.17	6300.98	-0.462664	0.144335	-3.20549	0.00134831	0.0408834	ENSG00000036828	CASR
9266	ENSG00000184677.18	1423.56	-0.462737	0.171669	-2.69553	0.00702777	0.115643	ENSG00000184677	ZBTB40
6547	ENSG00000157657.14	1418.15	-0.464661	0.170353	-2.72764	0.00637894	0.10793	ENSG00000157657	ZNF618
3140	ENSG00000116147.17	1444.88	-0.466111	0.167056	-2.79015	0.00526828	0.0944769	ENSG00000116147	TNR
8138	ENSG00000171316.12	5949.04	-0.466315	0.143641	-3.2464	0.00116874	0.0368654	ENSG00000171316	CHD7
4280	ENSG00000131089.17	1869	-0.466913	0.164359	-2.84081	0.00449991	0.0846949	ENSG00000131089	ARHGEF9
11215	ENSG00000274211.6	1483.28	-0.473937	0.177341	-2.67246	0.00752965	0.120253	ENSG00000274211	SOCS7
2631	ENSG00000110395.7	724.705	-0.474733	0.183782	-2.58313	0.00979089	0.141663	ENSG00000110395	CBL
1108	ENSG00000082458.12	1013.23	-0.479131	0.17157	-2.79263	0.00522813	0.0940484	ENSG00000082458	DLG3
223	ENSG00000012817.16	993.534	-0.480385	0.178719	-2.68794	0.00718944	0.116952	ENSG00000012817	KDM5D
510	ENSG00000054793.14	8887.34	-0.481734	0.150767	-3.19523	0.00139719	0.0416488	ENSG00000054793	ATP9A
880	ENSG00000073417.15	1033.02	-0.489775	0.177637	-2.75717	0.00583042	0.101174	ENSG00000073417	PDE8A
4540	ENSG00000133812.16	766.633	-0.490534	0.186282	-2.63329	0.00845618	0.130392	ENSG00000133812	SBF2
3417	ENSG00000119682.17	1685.31	-0.494753	0.172545	-2.86738	0.00413881	0.0805617	ENSG00000119682	AREL1
3323	ENSG00000118263.15	1163.52	-0.497285	0.182765	-2.7209	0.00651049	0.109505	ENSG00000118263	KLF7
6832	ENSG00000161217.12	655.629	-0.511488	0.196211	-2.60682	0.00913865	0.136207	ENSG00000161217	PCYT1A
2391	ENSG00000107562.16	3988.05	-0.511624	0.178507	-2.86613	0.00415519	0.0807426	ENSG00000107562	CXCL12
4511	ENSG00000133401.16	691.864	-0.513095	0.191413	-2.68056	0.00734995	0.118212	ENSG00000133401	PDZD2
9542	ENSG00000188042.8	754.34	-0.515378	0.189942	-2.71334	0.00666092	0.11159	ENSG00000188042	ARL4C
7143	ENSG00000163945.18	509.374	-0.525462	0.197201	-2.6646	0.00770793	0.122413	ENSG00000163945	UVSSA
4726	ENSG00000135473.15	1521.64	-0.530805	0.17055	-3.11232	0.00185624	0.049734	ENSG00000135473	PAN2
7360	ENSG00000165406.16	2750.33	-0.530865	0.15091	-3.51776	0.000435214	0.0195881	ENSG00000165406	MARCHF8
7501	ENSG00000166348.18	601.371	-0.531514	0.206946	-2.56837	0.0102177	0.146351	ENSG00000166348	USP54
2993	ENSG00000114770.17	783.515	-0.534158	0.178996	-2.98418	0.00284336	0.0648316	ENSG00000114770	ABCC5
8319	ENSG00000173214.7	453.832	-0.537754	0.202917	-2.65012	0.00804632	0.125856	ENSG00000173214	MFSD4B
9553	ENSG00000188211.9	917.298	-0.539548	0.202408	-2.66565	0.007684	0.122374	ENSG00000188211	NCR3LG1
846	ENSG00000072134.15	706.078	-0.540206	0.1863	-2.89965	0.00373577	0.0764438	ENSG00000072134	EPN2
9908	ENSG00000197943.10	1003.61	-0.544349	0.18513	-2.94036	0.0032783	0.0698085	ENSG00000197943	PLCG2
8906	ENSG00000180229.12	1181.98	-0.546503	0.171992	-3.17749	0.00148554	0.0433739	ENSG00000180229	HERC2P3
6191	ENSG00000152127.9	1111.22	-0.551883	0.21072	-2.61903	0.00881806	0.133348	ENSG00000152127	MGAT5
398	ENSG00000040633.13	919.69	-0.552879	0.183036	-3.02059	0.0025228	0.0597585	ENSG00000040633	PHF23
1295	ENSG00000089057.15	1532.6	-0.555803	0.166129	-3.34562	0.000820993	0.0295843	ENSG00000089057	SLC23A2
8372	ENSG00000173757.10	1068.05	-0.55659	0.169635	-3.28111	0.00103401	0.0340296	ENSG00000173757	STAT5B
698	ENSG00000066827.16	376.854	-0.55678	0.217595	-2.55879	0.0105037	0.148763	ENSG00000066827	ZFAT
5339	ENSG00000140992.19	2308.13	-0.560097	0.160516	-3.48936	0.000484172	0.0211706	ENSG00000140992	PDPK1
9084	ENSG00000182795.13	978.954	-0.564233	0.180353	-3.1285	0.00175702	0.0478639	ENSG00000182795	C1orf116
6203	ENSG00000152254.11	764.191	-0.581571	0.224051	-2.5957	0.00943971	0.138841	ENSG00000152254	G6PC2
4778	ENSG00000135905.19	392.196	-0.583564	0.216715	-2.69277	0.00708613	0.1161	ENSG00000135905	DOCK10
9249	ENSG00000184465.16	436.545	-0.585002	0.216527	-2.70175	0.00689751	0.114111	ENSG00000184465	WDR27
1152	ENSG00000084112.15	1585.01	-0.587029	0.179103	-3.27761	0.0010469	0.034256	ENSG00000084112	SSH1
8437	ENSG00000174485.16	559.512	-0.597591	0.192785	-3.09978	0.00193662	0.0509292	ENSG00000174485	DENND4A
7307	ENSG00000164961.16	827.825	-0.610915	0.193846	-3.15154	0.0016241	0.0455507	ENSG00000164961	WASHC5
983	ENSG00000077157.22	530.103	-0.632924	0.204342	-3.09738	0.00195238	0.0512253	ENSG00000077157	PPP1R12B
4006	ENSG00000127946.17	318.786	-0.643801	0.228404	-2.8187	0.0048219	0.0888462	ENSG00000127946	HIP1
4845	ENSG00000136383.7	362.008	-0.64725	0.241307	-2.68227	0.00731236	0.117884	ENSG00000136383	ALPK3
5257	ENSG00000140199.13	821.986	-0.65687	0.180336	-3.64247	0.000270036	0.0139518	ENSG00000140199	SLC12A6
9611	ENSG00000188933.16	631.097	-0.661764	0.201437	-3.28521	0.00101906	0.0339506	ENSG00000188933	USP32P1
3377	ENSG00000119321.9	832.197	-0.669183	0.177178	-3.77689	0.000158799	0.0104523	ENSG00000119321	FKBP15
9987	ENSG00000198466.12	492.021	-0.669778	0.213835	-3.13222	0.0017349	0.0473747	ENSG00000198466	ZNF587
5705	ENSG00000144791.10	609.065	-0.713623	0.197698	-3.60967	0.000306586	0.0154473	ENSG00000144791	LIMD1
10441	ENSG00000215158.9	178.749	-0.729686	0.27703	-2.63396	0.0084396	0.130392	ENSG00000215158	AC138409.2
10852	ENSG00000248905.10	177.275	-0.746858	0.276759	-2.69858	0.00696356	0.114817	ENSG00000248905	FMN1
4403	ENSG00000132464.13	181.793	-0.782482	0.273511	-2.86088	0.00422473	0.0816757	ENSG00000132464	ENAM
5367	ENSG00000141376.22	230.11	-0.813064	0.274685	-2.95999	0.00307649	0.0676219	ENSG00000141376	BCAS3
58	ENSG00000005156.12	843.067	-0.856973	0.201981	-4.24285	2.21e-05	0.00334587	ENSG00000005156	LIG3
11145	ENSG00000270149.5	613.041	-0.894893	0.265916	-3.36532	0.000764549	0.0279036	ENSG00000270149	AL591806.3
11116	ENSG00000268350.7	326.953	-1.19251	0.235644	-5.06065	4.18e-07	0.000226394	ENSG00000268350	FAM156A
11202	ENSG00000273590.4	174.258	-3.91948	0.385153	-10.1764	2.53e-24	2.88e-20	ENSG00000273590	SMIM11B
11006	ENSG00000260220.7	518.739	0.573563	0.224664	2.55298	0.0106805	0.150332	ENSG00000260220	CCDC187
2165	ENSG00000105281.12	1303.91	0.471904	0.184952	2.55149	0.0107262	0.15079	ENSG00000105281	SLC1A5
1027	ENSG00000078902.16	4425.68	0.376795	0.14773	2.55057	0.0107546	0.150854	ENSG00000078902	TOLLIP
8650	ENSG00000176994.11	1715.13	-0.433878	0.170116	-2.55048	0.0107573	0.150854	ENSG00000176994	SMCR8
6917	ENSG00000162426.15	193.335	0.694073	0.27264	2.54575	0.0109044	0.152505	ENSG00000162426	SLC45A1
7291	ENSG00000164896.20	5514.37	0.477613	0.187642	2.54534	0.010917	0.152505	ENSG00000164896	FASTK
9715	ENSG00000196498.13	8024.88	0.455037	0.178776	2.5453	0.0109185	0.152505	ENSG00000196498	NCOR2
728	ENSG00000067836.13	2187.48	0.42838	0.168352	2.54455	0.010942	0.152505	ENSG00000067836	ROGDI
9411	ENSG00000186010.19	4851.49	0.39326	0.154527	2.54493	0.01093	0.152505	ENSG00000186010	NDUFA13
11343	ENSG00000284753.2	531.892	0.634741	0.249842	2.54057	0.0110671	0.153872	ENSG00000284753	EEF1AKMT4
3978	ENSG00000127463.15	2501.22	-0.400882	0.157781	-2.54074	0.0110617	0.153872	ENSG00000127463	EMC1
3876	ENSG00000125912.11	4257.42	0.490019	0.193008	2.53885	0.0111217	0.154115	ENSG00000125912	NCLN
6818	ENSG00000161013.17	11932.6	0.387118	0.152482	2.53878	0.0111241	0.154115	ENSG00000161013	MGAT4B
3720	ENSG00000124201.15	972.635	-0.451817	0.177969	-2.53874	0.0111252	0.154115	ENSG00000124201	ZNFX1
9287	ENSG00000184924.5	571.831	0.521731	0.205575	2.53791	0.0111516	0.154293	ENSG00000184924	PTRHD1
1544	ENSG00000100058.12	863.457	0.477858	0.188488	2.53522	0.0112378	0.154539	ENSG00000100058	CRYBB2P1
1329	ENSG00000090020.11	1528.35	0.424264	0.167345	2.53527	0.0112361	0.154539	ENSG00000090020	SLC9A1
439	ENSG00000048140.18	2821.28	0.414878	0.163564	2.53649	0.011197	0.154539	ENSG00000048140	TSPAN17
8561	ENSG00000175832.13	1826.15	0.409778	0.161659	2.53484	0.01125	0.154539	ENSG00000175832	ETV4
7645	ENSG00000167468.18	7795.01	0.398367	0.157044	2.53665	0.0111918	0.154539	ENSG00000167468	GPX4
4529	ENSG00000133687.16	2427.62	-0.45013	0.177579	-2.53481	0.0112508	0.154539	ENSG00000133687	TMTC1
10737	ENSG00000241343.10	1140.59	0.448026	0.176791	2.5342	0.0112703	0.15459	ENSG00000241343	RPL36A
9602	ENSG00000188807.13	2296.02	0.443718	0.175145	2.53343	0.0112952	0.15459	ENSG00000188807	TMEM201
7503	ENSG00000166387.13	321.26	-0.619433	0.24449	-2.53357	0.0112906	0.15459	ENSG00000166387	PPFIBP2
8829	ENSG00000179115.11	5073.75	0.461664	0.182259	2.53301	0.0113089	0.154591	ENSG00000179115	FARSA
10340	ENSG00000213347.10	1287.13	0.562658	0.222238	2.53178	0.0113485	0.154946	ENSG00000213347	MXD3
4930	ENSG00000137038.8	612.069	0.584025	0.230729	2.53121	0.0113668	0.155011	ENSG00000137038	DMAC1
6526	ENSG00000157350.13	1050.67	0.447429	0.176825	2.53034	0.0113951	0.155211	ENSG00000157350	ST3GAL2
8800	ENSG00000178882.15	405.632	0.641798	0.253997	2.52679	0.0115109	0.156601	ENSG00000178882	RFLNA
1043	ENSG00000079435.10	789.897	0.497562	0.197318	2.52162	0.0116815	0.158731	ENSG00000079435	LIPE
3990	ENSG00000127586.17	1817.57	0.532113	0.211058	2.52118	0.0116963	0.158744	ENSG00000127586	CHTF18
6363	ENSG00000154874.15	212.411	-0.673876	0.26745	-2.51964	0.0117476	0.15925	ENSG00000154874	CCDC144B
5486	ENSG00000142733.17	296.331	0.649024	0.257786	2.51768	0.0118129	0.159945	ENSG00000142733	MAP3K6
899	ENSG00000074317.11	282.096	0.636282	0.252834	2.5166	0.0118494	0.160058	ENSG00000074317	SNCB
2510	ENSG00000108799.13	868.068	-0.4444	0.176586	-2.51662	0.0118488	0.160058	ENSG00000108799	EZH1
2163	ENSG00000105258.9	1417.04	0.415784	0.165266	2.51584	0.0118748	0.160211	ENSG00000105258	POLR2I
11147	ENSG00000270231.4	797.987	-0.445834	0.177302	-2.51455	0.0119185	0.160611	ENSG00000270231	NBPF8
2168	ENSG00000105290.13	24002.6	0.396957	0.158026	2.51196	0.0120061	0.1616	ENSG00000105290	APLP1
7755	ENSG00000168140.5	316.002	0.592129	0.23635	2.50531	0.0122344	0.162034	ENSG00000168140	VASN
6612	ENSG00000158555.15	544.945	0.583609	0.23303	2.50444	0.0122647	0.162034	ENSG00000158555	GDPD5
11109	ENSG00000267673.6	1150.19	0.536567	0.213964	2.50774	0.0121505	0.162034	ENSG00000267673	FDX2
10007	ENSG00000198598.6	1180.41	0.495924	0.197989	2.50481	0.0122518	0.162034	ENSG00000198598	MMP17
10756	ENSG00000242028.8	1240.95	0.494723	0.197085	2.5102	0.0120661	0.162034	ENSG00000242028	HYPK
4749	ENSG00000135638.14	1062.35	0.493984	0.19708	2.50651	0.0121929	0.162034	ENSG00000135638	EMX1
2960	ENSG00000114383.10	936.221	0.474977	0.189557	2.50573	0.01222	0.162034	ENSG00000114383	TUSC2
5239	ENSG00000139880.19	1881.61	0.459731	0.183392	2.50683	0.0121821	0.162034	ENSG00000139880	CDH24
4107	ENSG00000129255.16	4215.82	0.439361	0.17545	2.5042	0.012273	0.162034	ENSG00000129255	MPDU1
6545	ENSG00000157637.13	5234.49	0.434855	0.173402	2.50778	0.0121492	0.162034	ENSG00000157637	SLC38A10
8240	ENSG00000172354.10	22671.1	0.431083	0.17183	2.50877	0.0121152	0.162034	ENSG00000172354	GNB2
7938	ENSG00000169683.8	2046.68	0.426944	0.170265	2.50753	0.0121579	0.162034	ENSG00000169683	LRRC45
1501	ENSG00000099797.15	14589.8	0.409736	0.16352	2.50572	0.0122201	0.162034	ENSG00000099797	TECR
7975	ENSG00000169957.10	1985.53	0.400147	0.159497	2.50881	0.0121138	0.162034	ENSG00000169957	ZNF768
6461	ENSG00000156467.10	2604.86	0.383639	0.152836	2.51014	0.0120683	0.162034	ENSG00000156467	UQCRB
2639	ENSG00000110514.19	3721.48	-0.399979	0.159705	-2.50448	0.012263	0.162034	ENSG00000110514	MADD
10452	ENSG00000215421.9	973.813	-0.505831	0.20201	-2.50399	0.0122803	0.162034	ENSG00000215421	ZNF407
7241	ENSG00000164405.11	2144.53	0.390677	0.156158	2.5018	0.0123563	0.162848	ENSG00000164405	UQCRQ
4141	ENSG00000129932.10	839.051	0.507955	0.203161	2.50026	0.0124102	0.163371	ENSG00000129932	DOHH
3918	ENSG00000126391.14	1251.71	0.496164	0.198652	2.49766	0.0125016	0.164384	ENSG00000126391	FRMD8
6842	ENSG00000161513.12	336.618	0.626298	0.251146	2.49376	0.0126398	0.165272	ENSG00000161513	FDXR
7947	ENSG00000169733.12	2219.24	0.492037	0.197189	2.49526	0.0125865	0.165272	ENSG00000169733	RFNG
5048	ENSG00000138030.13	2416.14	0.422808	0.169522	2.49412	0.012627	0.165272	ENSG00000138030	KHK
2822	ENSG00000112576.13	2736.51	0.421362	0.168904	2.49468	0.0126071	0.165272	ENSG00000112576	CCND3
722	ENSG00000067596.12	1269.82	-0.425653	0.170691	-2.4937	0.0126418	0.165272	ENSG00000067596	DHX8
7731	ENSG00000167996.16	37013.4	0.369958	0.148385	2.49323	0.0126586	0.165302	ENSG00000167996	FTH1
10521	ENSG00000224093.5	533.268	-0.496291	0.199521	-2.48741	0.0128675	0.167838	ENSG00000224093	BCAR3-AS1
3066	ENSG00000115461.5	19929.9	-0.400579	0.161111	-2.48635	0.0129061	0.168148	ENSG00000115461	IGFBP5
10297	ENSG00000206140.11	205.915	0.894301	0.360128	2.48328	0.0130177	0.169409	ENSG00000206140	TMEM191C
1758	ENSG00000101204.18	190.807	0.955663	0.385262	2.48055	0.013118	0.170331	ENSG00000101204	CHRNA4
7892	ENSG00000169220.18	425.683	0.547974	0.220946	2.48013	0.0131335	0.170331	ENSG00000169220	RGS14
6552	ENSG00000157778.9	658.591	0.470005	0.1895	2.48024	0.0131295	0.170331	ENSG00000157778	PSMG3
10739	ENSG00000241370.6	944.201	0.469215	0.189354	2.47798	0.013213	0.171167	ENSG00000241370	RPP21
1135	ENSG00000083750.13	271.739	-0.601893	0.242959	-2.47734	0.0132364	0.171276	ENSG00000083750	RRAGB
4128	ENSG00000129566.13	641.67	-0.514301	0.207762	-2.47544	0.0133072	0.171997	ENSG00000129566	TEP1
8949	ENSG00000180992.7	925.91	0.432928	0.175023	2.47355	0.0133779	0.172324	ENSG00000180992	MRPL14
190	ENSG00000011021.23	2500.93	-0.420919	0.170131	-2.47408	0.0133578	0.172324	ENSG00000011021	CLCN6
9729	ENSG00000196569.13	346.235	-0.705577	0.285246	-2.47357	0.0133769	0.172324	ENSG00000196569	LAMA2
11127	ENSG00000269293.3	328.96	0.553191	0.224076	2.46877	0.0135579	0.174445	ENSG00000269293	ZSCAN16-AS1
6321	ENSG00000154229.12	1199.92	-0.432513	0.175231	-2.46825	0.0135776	0.174502	ENSG00000154229	PRKCA
7691	ENSG00000167711.14	279.473	0.643446	0.260988	2.46543	0.013685	0.175289	ENSG00000167711	SERPINF2
9720	ENSG00000196517.13	697.853	0.475033	0.19265	2.46579	0.0136713	0.175289	ENSG00000196517	SLC6A9
6658	ENSG00000159176.14	1980	0.460591	0.186789	2.46583	0.0136696	0.175289	ENSG00000159176	CSRP1
1759	ENSG00000101210.13	66611.8	0.354397	0.143929	2.46231	0.0138044	0.176619	ENSG00000101210	EEF1A2
6855	ENSG00000161714.12	374.493	0.68122	0.276747	2.46153	0.0138347	0.176808	ENSG00000161714	PLCD3
10668	ENSG00000235863.4	831.208	0.462973	0.188179	2.46027	0.0138831	0.177227	ENSG00000235863	B3GALT4
1042	ENSG00000079432.7	5491.04	0.471339	0.191624	2.4597	0.0139052	0.177311	ENSG00000079432	CIC
7971	ENSG00000169926.11	1935.43	0.395747	0.16092	2.45928	0.0139215	0.17732	ENSG00000169926	KLF13
8843	ENSG00000179271.3	2060.28	0.431929	0.175684	2.45855	0.0139499	0.177483	ENSG00000179271	GADD45GIP1
10984	ENSG00000258986.7	7357.16	0.509567	0.207346	2.45756	0.0139883	0.177774	ENSG00000258986	TMEM179
8438	ENSG00000174498.14	2010.64	0.427957	0.174261	2.45584	0.0140555	0.178427	ENSG00000174498	IGDCC3
10609	ENSG00000231527.7	174.82	0.685858	0.279325	2.45541	0.0140723	0.178442	ENSG00000231527	FAM27C
7280	ENSG00000164756.12	5721.93	-0.448292	0.182817	-2.45214	0.0142008	0.179872	ENSG00000164756	SLC30A8
6851	ENSG00000161671.17	22035.8	0.362097	0.147733	2.45102	0.0142451	0.180032	ENSG00000161671	EMC10
556	ENSG00000058866.15	244.587	-0.630789	0.257357	-2.45102	0.0142451	0.180032	ENSG00000058866	DGKG
5884	ENSG00000147262.4	207.887	-0.722273	0.294761	-2.45036	0.0142712	0.180161	ENSG00000147262	GPR119
7620	ENSG00000167258.15	1603.35	-0.413795	0.16896	-2.44907	0.0143227	0.180612	ENSG00000167258	CDK12
4326	ENSG00000131584.19	12501	0.422076	0.172414	2.44803	0.0143638	0.18073	ENSG00000131584	ACAP3
10416	ENSG00000214425.8	693.67	-0.463397	0.189289	-2.4481	0.0143613	0.18073	ENSG00000214425	LRRC37A4P
3088	ENSG00000115687.14	1285.39	-0.408432	0.166979	-2.44601	0.0144448	0.181548	ENSG00000115687	PASK
8339	ENSG00000173456.5	4264.75	0.418379	0.171117	2.44499	0.0144857	0.181678	ENSG00000173456	RNF26
2979	ENSG00000114631.11	5054.43	0.377491	0.154396	2.44495	0.014487	0.181678	ENSG00000114631	PODXL2
3294	ENSG00000117691.10	1605.34	0.416588	0.170461	2.44389	0.01453	0.182017	ENSG00000117691	NENF
6706	ENSG00000159921.18	1486.65	-0.390917	0.159989	-2.4434	0.0145496	0.182062	ENSG00000159921	GNE
9483	ENSG00000187079.19	2328.12	-0.401923	0.164567	-2.4423	0.014594	0.182418	ENSG00000187079	TEAD1
5582	ENSG00000143554.14	1585.1	0.415288	0.170171	2.44041	0.0146705	0.183172	ENSG00000143554	SLC27A3
11056	ENSG00000262655.4	2851.34	-0.434515	0.178102	-2.4397	0.0146995	0.183334	ENSG00000262655	SPON1
5435	ENSG00000141971.13	1944.84	0.451053	0.184944	2.43886	0.0147336	0.183357	ENSG00000141971	MVB12A
4775	ENSG00000135862.6	3373.11	-0.375491	0.15394	-2.43921	0.0147193	0.183357	ENSG00000135862	LAMC1
1002	ENSG00000077942.19	161.256	0.88629	0.363541	2.43794	0.0147714	0.183626	ENSG00000077942	FBLN1
9410	ENSG00000186001.14	1183.67	-0.422127	0.173301	-2.4358	0.014859	0.184514	ENSG00000186001	LRCH3
2840	ENSG00000112715.24	11002.7	-0.343776	0.141181	-2.435	0.0148916	0.184718	ENSG00000112715	VEGFA
209	ENSG00000011478.12	438.199	0.515913	0.211917	2.43451	0.0149119	0.184768	ENSG00000011478	QPCTL
10929	ENSG00000255310.2	225.993	-0.617193	0.253582	-2.43389	0.0149373	0.184882	ENSG00000255310	AF131215.5
9036	ENSG00000182208.14	806.967	0.446843	0.183743	2.43189	0.0150203	0.185707	ENSG00000182208	MOB2
6743	ENSG00000160256.13	502.132	0.517236	0.212846	2.43009	0.015095	0.186237	ENSG00000160256	FAM207A
3155	ENSG00000116260.17	7649.83	0.415804	0.171108	2.43007	0.0150959	0.186237	ENSG00000116260	QSOX1
6592	ENSG00000158286.13	213.877	-0.703574	0.289635	-2.42917	0.0151332	0.186496	ENSG00000158286	RNF207
4082	ENSG00000128965.13	2272.68	0.554612	0.228387	2.42839	0.0151662	0.186699	ENSG00000128965	CHAC1
1507	ENSG00000099817.12	4715.91	0.40685	0.167586	2.4277	0.0151949	0.186747	ENSG00000099817	POLR2E
3123	ENSG00000116016.14	2253.81	-0.395488	0.162919	-2.42751	0.0152028	0.186747	ENSG00000116016	EPAS1
7864	ENSG00000169020.10	966.391	0.429526	0.177124	2.425	0.0153085	0.187842	ENSG00000169020	ATP5ME
1983	ENSG00000103353.16	1877.25	-0.41547	0.171409	-2.42385	0.0153571	0.188235	ENSG00000103353	UBFD1
1686	ENSG00000100726.15	1423.24	0.443835	0.183163	2.42316	0.0153859	0.188387	ENSG00000100726	TELO2
9228	ENSG00000184220.12	184.06	0.820307	0.33865	2.42229	0.0154231	0.188436	ENSG00000184220	CMSS1
6800	ENSG00000160813.7	1203.39	0.523003	0.215886	2.42259	0.0154103	0.188436	ENSG00000160813	PPP1R35
4163	ENSG00000130202.10	956.956	0.546058	0.225467	2.4219	0.0154396	0.188436	ENSG00000130202	NECTIN2
7237	ENSG00000164362.21	482.37	-0.531831	0.219737	-2.4203	0.0155076	0.189063	ENSG00000164362	TERT
10670	ENSG00000235961.6	906.304	0.494273	0.20437	2.41853	0.0155836	0.189381	ENSG00000235961	PNMA6A
10879	ENSG00000250799.11	906.076	0.461519	0.190806	2.41879	0.0155724	0.189381	ENSG00000250799	PRODH2
10835	ENSG00000247596.9	1808.34	0.451084	0.186481	2.41892	0.0155666	0.189381	ENSG00000247596	TWF2
1075	ENSG00000080854.16	1848.29	0.385905	0.159635	2.41742	0.0156309	0.189754	ENSG00000080854	IGSF9B
3311	ENSG00000118046.16	2140.45	0.449416	0.18607	2.41531	0.0157217	0.190451	ENSG00000118046	STK11
3891	ENSG00000126005.17	2680.42	0.403947	0.167244	2.41532	0.0157214	0.190451	ENSG00000126005	MMP24OS
2641	ENSG00000110583.13	1653.39	-0.393426	0.162932	-2.41466	0.0157498	0.190588	ENSG00000110583	NAA40
4685	ENSG00000135144.7	1059.36	0.453146	0.187844	2.41236	0.0158497	0.191389	ENSG00000135144	DTX1
11055	ENSG00000262246.6	4758.62	0.419993	0.174083	2.4126	0.0158393	0.191389	ENSG00000262246	CORO7
4629	ENSG00000134697.13	1128.23	0.408849	0.169734	2.40876	0.0160069	0.193083	ENSG00000134697	GNL2
7931	ENSG00000169627.9	750.114	0.492683	0.204586	2.40819	0.0160316	0.193166	ENSG00000169627	BOLA2B
7695	ENSG00000167733.13	1362.77	0.443359	0.184132	2.40783	0.0160477	0.193166	ENSG00000167733	HSD11B1L
4499	ENSG00000133243.10	3573.71	0.432749	0.179858	2.40606	0.0161255	0.193897	ENSG00000133243	BTBD2
7504	ENSG00000166398.14	664.149	-0.469485	0.195258	-2.40443	0.0161976	0.194559	ENSG00000166398	GARRE1
410	ENSG00000042493.16	509.837	0.515408	0.214502	2.40281	0.0162697	0.195022	ENSG00000042493	CAPG
446	ENSG00000048649.13	1444.22	0.392121	0.163194	2.40279	0.0162704	0.195022	ENSG00000048649	RSF1
795	ENSG00000070404.10	419.57	0.51497	0.214579	2.39991	0.016399	0.196357	ENSG00000070404	FSTL3
5341	ENSG00000140995.16	2281.51	0.423312	0.176441	2.39917	0.0164323	0.196549	ENSG00000140995	DEF8
9256	ENSG00000184545.11	3435.79	0.437211	0.182387	2.39716	0.0165228	0.197084	ENSG00000184545	DUSP8
9536	ENSG00000187954.12	2623.73	0.408816	0.170526	2.39738	0.016513	0.197084	ENSG00000187954	CYHR1
1115	ENSG00000082805.20	1812.13	-0.40251	0.167921	-2.39702	0.016529	0.197084	ENSG00000082805	ERC1
133	ENSG00000007545.16	882.781	-0.481516	0.201264	-2.39245	0.0167362	0.199347	ENSG00000007545	CRAMP1
7735	ENSG00000168005.9	2927.3	0.387034	0.161804	2.39199	0.0167574	0.199391	ENSG00000168005	SPINDOC
2883	ENSG00000113360.16	1691.27	0.535645	0.224357	2.38747	0.0169649	0.20084	ENSG00000113360	DROSHA
3767	ENSG00000124762.14	405.794	0.528541	0.221287	2.38849	0.0169179	0.20084	ENSG00000124762	CDKN1A
7823	ENSG00000168758.11	529.167	0.521747	0.218455	2.38835	0.0169244	0.20084	ENSG00000168758	SEMA4C
1638	ENSG00000100429.18	968.906	0.447107	0.187308	2.38701	0.0169859	0.20084	ENSG00000100429	HDAC10
1837	ENSG00000101940.18	7015.12	0.43708	0.183154	2.3864	0.0170141	0.20084	ENSG00000101940	WDR13
7732	ENSG00000168000.14	5404.69	0.417195	0.174832	2.38627	0.0170204	0.20084	ENSG00000168000	BSCL2
10386	ENSG00000213949.10	649.337	-0.551596	0.231117	-2.38666	0.0170023	0.20084	ENSG00000213949	ITGA1
6519	ENSG00000157227.13	391.493	-0.569199	0.238478	-2.3868	0.0169958	0.20084	ENSG00000157227	MMP14
9291	ENSG00000184967.7	1141.32	0.436116	0.182882	2.38468	0.0170939	0.201083	ENSG00000184967	NOC4L
10887	ENSG00000251562.8	31097.8	0.394836	0.165564	2.3848	0.0170885	0.201083	ENSG00000251562	MALAT1
9297	ENSG00000185002.10	2062.65	-0.376583	0.157903	-2.3849	0.0170838	0.201083	ENSG00000185002	RFX6
10666	ENSG00000235750.10	361.76	-0.515945	0.216568	-2.38237	0.0172017	0.202142	ENSG00000235750	KIAA0040
1505	ENSG00000099812.9	2426.6	0.406991	0.170951	2.38075	0.0172775	0.202824	ENSG00000099812	MISP
1858	ENSG00000102109.9	68127.2	0.448112	0.188289	2.37992	0.0173163	0.203026	ENSG00000102109	PCSK1N
6825	ENSG00000161091.13	3976.98	0.437511	0.183857	2.37962	0.0173304	0.203026	ENSG00000161091	MFSD12
3378	ENSG00000119326.15	1192.72	0.398859	0.167895	2.37565	0.0175182	0.205016	ENSG00000119326	CTNNAL1
3968	ENSG00000127220.6	1416.17	0.452527	0.19063	2.37385	0.0176039	0.205807	ENSG00000127220	ABHD8
2203	ENSG00000105523.3	1403.89	0.448974	0.189187	2.37318	0.0176357	0.205967	ENSG00000105523	FAM83E
8459	ENSG00000174744.14	1672.66	0.419388	0.176777	2.37242	0.0176721	0.205969	ENSG00000174744	BRMS1
7690	ENSG00000167703.15	2244.51	0.405781	0.171033	2.37253	0.0176667	0.205969	ENSG00000167703	SLC43A2
3870	ENSG00000125875.14	3477.56	-0.355133	0.149856	-2.36983	0.0177964	0.207206	ENSG00000125875	TBC1D20
8462	ENSG00000174775.17	2502.47	0.471516	0.199145	2.3677	0.0178991	0.207976	ENSG00000174775	HRAS
11057	ENSG00000262664.3	1496.8	0.434118	0.183324	2.36803	0.0178831	0.207976	ENSG00000262664	OVCA2
8882	ENSG00000179922.6	463.358	0.510413	0.215692	2.3664	0.0179622	0.208497	ENSG00000179922	ZNF784
4000	ENSG00000127838.14	1864	0.431864	0.182559	2.36561	0.0180006	0.208729	ENSG00000127838	PNKD
2734	ENSG00000111696.12	872.263	-0.439233	0.185704	-2.36523	0.0180191	0.208731	ENSG00000111696	NT5DC3
2157	ENSG00000105223.20	18479.5	0.399236	0.168862	2.36428	0.0180653	0.209055	ENSG00000105223	PLD3
1766	ENSG00000101255.11	20832.9	0.396273	0.16771	2.36285	0.0181351	0.209649	ENSG00000101255	TRIB3
3544	ENSG00000121410.12	631.245	0.556348	0.235624	2.36117	0.0182174	0.209723	ENSG00000121410	A1BG
8355	ENSG00000173581.8	1147.93	0.434748	0.184229	2.35982	0.018284	0.209723	ENSG00000173581	CCDC106
9389	ENSG00000185800.12	1987.53	0.419096	0.177511	2.36095	0.018228	0.209723	ENSG00000185800	DMWD
7704	ENSG00000167797.8	2308.94	0.406841	0.172428	2.35948	0.0183005	0.209723	ENSG00000167797	CDK2AP2
2141	ENSG00000105088.8	3595.3	0.392502	0.166161	2.36219	0.0181675	0.209723	ENSG00000105088	OLFM2
2716	ENSG00000111639.8	1721.83	0.375708	0.159259	2.3591	0.0183195	0.209723	ENSG00000111639	MRPL51
10434	ENSG00000215012.9	2604.78	0.367904	0.15596	2.35897	0.0183256	0.209723	ENSG00000215012	RTL10
5025	ENSG00000137822.13	1429.3	-0.398254	0.16863	-2.3617	0.0181914	0.209723	ENSG00000137822	TUBGCP4
4248	ENSG00000130803.15	849.196	-0.418974	0.177516	-2.36021	0.0182647	0.209723	ENSG00000130803	ZNF317
4639	ENSG00000134775.15	726.72	-0.470633	0.199464	-2.35949	0.0183	0.209723	ENSG00000134775	FHOD3
7532	ENSG00000166548.16	352.757	-0.533532	0.226363	-2.35697	0.0184248	0.210646	ENSG00000166548	TK2
5197	ENSG00000139410.15	193.162	0.7019	0.298247	2.35342	0.0186018	0.210974	ENSG00000139410	SDSL
3108	ENSG00000115884.11	527.059	0.484371	0.205652	2.35529	0.0185082	0.210974	ENSG00000115884	SDC1
1362	ENSG00000090975.12	563.644	0.463561	0.19677	2.35586	0.0184801	0.210974	ENSG00000090975	PITPNM2
4643	ENSG00000134809.9	543.125	0.455368	0.193436	2.3541	0.0185677	0.210974	ENSG00000134809	TIMM10
8423	ENSG00000174358.16	754.106	0.446322	0.189596	2.35406	0.0185694	0.210974	ENSG00000174358	SLC6A19
1791	ENSG00000101439.9	12715.7	0.421988	0.179291	2.35365	0.0185899	0.210974	ENSG00000101439	CST3
2383	ENSG00000107404.20	2884.6	0.398721	0.169344	2.35451	0.0185473	0.210974	ENSG00000107404	DVL1
8531	ENSG00000175416.15	2754.37	0.36299	0.15418	2.35433	0.018556	0.210974	ENSG00000175416	CLTB
9432	ENSG00000186260.17	1590.35	-0.386749	0.164393	-2.35259	0.018643	0.211232	ENSG00000186260	MRTFB
2536	ENSG00000109072.14	3186.64	0.399783	0.170008	2.35155	0.0186955	0.211616	ENSG00000109072	VTN
2982	ENSG00000114650.20	7568.27	0.454101	0.19326	2.34969	0.0187888	0.212461	ENSG00000114650	SCAP
878	ENSG00000073169.14	1794.6	0.438925	0.1869	2.34844	0.0188522	0.212607	ENSG00000073169	SELENOO
2178	ENSG00000105364.14	2573.16	0.409227	0.174225	2.34883	0.0188323	0.212607	ENSG00000105364	MRPL4
8628	ENSG00000176700.20	269.573	-0.59027	0.251357	-2.34833	0.0188578	0.212607	ENSG00000176700	SCAND2P
10256	ENSG00000205309.14	338.596	0.668634	0.284803	2.3477	0.0188895	0.212754	ENSG00000205309	NT5M
9842	ENSG00000197355.11	1826.12	0.374869	0.159732	2.34686	0.0189323	0.213025	ENSG00000197355	UAP1L1
1376	ENSG00000091428.18	575.091	-0.463977	0.197753	-2.34625	0.0189634	0.213165	ENSG00000091428	RAPGEF4
10288	ENSG00000205765.9	950.954	-0.404449	0.172446	-2.34536	0.0190086	0.213463	ENSG00000205765	C5orf51
637	ENSG00000065029.15	1528.5	-0.388157	0.165652	-2.3432	0.019119	0.214491	ENSG00000065029	ZNF76
2226	ENSG00000105676.14	2513.78	0.404624	0.172724	2.3426	0.0191501	0.214628	ENSG00000105676	ARMC6
9933	ENSG00000198055.11	2691.93	0.364721	0.155829	2.34052	0.0192567	0.215398	ENSG00000198055	GRK6
5483	ENSG00000142687.18	1543.38	-0.425804	0.181921	-2.3406	0.0192529	0.215398	ENSG00000142687	KIAA0319L
10164	ENSG00000204237.5	1193.72	0.471116	0.201446	2.33867	0.0193525	0.216258	ENSG00000204237	OXLD1
2743	ENSG00000111752.11	1710.91	-0.390983	0.167263	-2.33754	0.0194109	0.216698	ENSG00000111752	PHC1
647	ENSG00000065308.5	1028.02	-0.417457	0.178628	-2.33701	0.0194385	0.216793	ENSG00000065308	TRAM2
4909	ENSG00000136877.15	1812.22	0.3876	0.165911	2.33619	0.0194813	0.217059	ENSG00000136877	FPGS
220	ENSG00000012232.9	1756.34	-0.383177	0.164114	-2.33482	0.0195529	0.217643	ENSG00000012232	EXTL3
545	ENSG00000058262.10	11477.7	-0.333216	0.14283	-2.33295	0.0196507	0.218092	ENSG00000058262	SEC61A1
704	ENSG00000067057.17	1004.83	-0.396882	0.170114	-2.33303	0.0196465	0.218092	ENSG00000067057	PFKP
2595	ENSG00000109920.13	1224.72	-0.409246	0.175417	-2.33299	0.0196485	0.218092	ENSG00000109920	FNBP4
11140	ENSG00000269955.2	666.688	0.42906	0.184001	2.33183	0.0197098	0.218492	ENSG00000269955	FMC1-LUC7L2
9854	ENSG00000197457.10	9761.02	0.354702	0.152132	2.33154	0.0197251	0.218492	ENSG00000197457	STMN3
6975	ENSG00000162910.19	724.374	0.455939	0.195592	2.33107	0.0197497	0.218551	ENSG00000162910	MRPL55
6742	ENSG00000160233.8	556.976	0.44629	0.191513	2.33034	0.0197882	0.218597	ENSG00000160233	LRRC3
1923	ENSG00000102967.12	232.81	-0.645598	0.277049	-2.33026	0.0197922	0.218597	ENSG00000102967	DHODH
10910	ENSG00000254470.3	3333.74	0.439823	0.18881	2.32944	0.0198355	0.218761	ENSG00000254470	AP5B1
7646	ENSG00000167470.12	1983.83	0.385382	0.165465	2.32908	0.0198546	0.218761	ENSG00000167470	MIDN
123	ENSG00000007202.15	4621.2	-0.365194	0.15681	-2.32889	0.0198647	0.218761	ENSG00000007202	KIAA0100
5314	ENSG00000140691.18	1463.07	0.513835	0.220677	2.32845	0.0198885	0.218812	ENSG00000140691	ARMC5
4907	ENSG00000136874.11	624.823	-0.4876	0.209595	-2.32639	0.0199979	0.219804	ENSG00000136874	STX17
8901	ENSG00000180182.11	3533.63	-0.365841	0.157288	-2.32593	0.0200222	0.219858	ENSG00000180182	MED14
4306	ENSG00000131389.17	3961.82	-0.359393	0.154584	-2.32491	0.0200769	0.220246	ENSG00000131389	SLC6A6
10275	ENSG00000205593.12	395.949	0.51115	0.220073	2.32264	0.0201987	0.220521	ENSG00000205593	DENND6B
3874	ENSG00000125898.13	1543.03	0.507157	0.218327	2.32292	0.0201832	0.220521	ENSG00000125898	FAM110A
8247	ENSG00000172428.11	673.086	0.483345	0.207999	2.32378	0.020137	0.220521	ENSG00000172428	COPS9
4979	ENSG00000137404.14	1764.5	0.411158	0.177005	2.32286	0.0201868	0.220521	ENSG00000137404	NRM
9579	ENSG00000188559.15	2566.31	-0.354206	0.152472	-2.32309	0.0201741	0.220521	ENSG00000188559	RALGAPA2
8888	ENSG00000179958.9	1259.58	0.383051	0.164969	2.32196	0.0202353	0.220708	ENSG00000179958	DCTPP1
3595	ENSG00000122386.11	772.538	0.440259	0.189639	2.32156	0.0202565	0.220728	ENSG00000122386	ZNF205
2190	ENSG00000105427.10	252.726	0.583929	0.251798	2.31904	0.0203928	0.221366	ENSG00000105427	CNFN
1185	ENSG00000085644.14	1241.2	0.467325	0.201498	2.31925	0.0203812	0.221366	ENSG00000085644	ZNF213
2803	ENSG00000112306.8	6786.91	0.359694	0.155077	2.31946	0.0203702	0.221366	ENSG00000112306	RPS12
5294	ENSG00000140488.16	257.539	-0.569565	0.245492	-2.3201	0.0203357	0.221366	ENSG00000140488	CELF6
8312	ENSG00000173153.16	2029.67	0.45921	0.198229	2.31656	0.0205277	0.222618	ENSG00000173153	ESRRA
9545	ENSG00000188130.14	1576.41	0.395871	0.17096	2.31558	0.0205813	0.222986	ENSG00000188130	MAPK12
595	ENSG00000062822.15	4247.77	0.404698	0.17488	2.31414	0.0206598	0.223625	ENSG00000062822	POLD1
7708	ENSG00000167861.16	5310.55	0.399329	0.172591	2.31373	0.0206828	0.223661	ENSG00000167861	HID1
8080	ENSG00000170873.19	3811.79	-0.340873	0.147422	-2.31222	0.0207654	0.224313	ENSG00000170873	MTSS1
3195	ENSG00000116704.8	255.241	-0.557139	0.240986	-2.31191	0.0207825	0.224313	ENSG00000116704	SLC35D1
8108	ENSG00000171130.18	10920.5	0.390981	0.169154	2.31139	0.0208114	0.224412	ENSG00000171130	ATP6V0E2
842	ENSG00000072071.16	10313.3	0.41664	0.180346	2.31022	0.0208759	0.224895	ENSG00000072071	ADGRL1
6781	ENSG00000160695.15	1399.56	-0.389355	0.168578	-2.30964	0.0209082	0.22503	ENSG00000160695	VPS11
7787	ENSG00000168393.13	1694.77	0.385665	0.167034	2.30891	0.0209488	0.225254	ENSG00000168393	DTYMK
8325	ENSG00000173264.14	2972.95	0.466571	0.202113	2.30846	0.0209735	0.225307	ENSG00000173264	GPR137
9884	ENSG00000197756.10	9248.96	0.353984	0.153458	2.30672	0.0210705	0.226135	ENSG00000197756	RPL37A
8149	ENSG00000171450.6	4624.23	0.405795	0.175979	2.30592	0.0211148	0.226398	ENSG00000171450	CDK5R2
9018	ENSG00000182095.14	1902.99	0.497363	0.215822	2.30451	0.0211943	0.227036	ENSG00000182095	TNRC18
10474	ENSG00000218891.5	1840.99	0.467959	0.203166	2.30333	0.02126	0.227522	ENSG00000218891	ZNF579
5525	ENSG00000143195.13	337.737	-0.724075	0.314407	-2.30299	0.0212797	0.227522	ENSG00000143195	ILDR2
9793	ENSG00000197019.5	295.926	0.589617	0.256214	2.30127	0.0213764	0.228227	ENSG00000197019	SERTAD1
292	ENSG00000023171.18	854.045	-0.440331	0.191356	-2.30111	0.0213857	0.228227	ENSG00000023171	GRAMD1B
9707	ENSG00000196456.13	1243.66	0.447462	0.194515	2.30039	0.0214261	0.228445	ENSG00000196456	ZNF775
8976	ENSG00000181409.14	686.771	0.640896	0.278963	2.29742	0.0215947	0.229876	ENSG00000181409	AATK
4374	ENSG00000132207.18	874.906	0.45934	0.199946	2.29732	0.0216007	0.229876	ENSG00000132207	SLX1A
9595	ENSG00000188735.13	712.941	0.427136	0.186172	2.29431	0.0217728	0.231491	ENSG00000188735	TMEM120B
9875	ENSG00000197696.10	166.336	0.676111	0.294996	2.29193	0.0219094	0.232726	ENSG00000197696	NMB
8346	ENSG00000173511.9	3914.02	0.417704	0.182327	2.29095	0.0219661	0.233111	ENSG00000173511	VEGFB
1532	ENSG00000099999.15	546.448	0.483509	0.211149	2.28989	0.0220277	0.233113	ENSG00000099999	RNF215
3054	ENSG00000115355.17	2019.91	0.354078	0.154619	2.29	0.0220212	0.233113	ENSG00000115355	CCDC88A
8747	ENSG00000178031.17	3286.84	-0.339363	0.148201	-2.28989	0.0220275	0.233113	ENSG00000178031	ADAMTSL1
2540	ENSG00000109089.7	341.406	0.526303	0.229902	2.28925	0.0220649	0.23329	ENSG00000109089	CDR2L
9822	ENSG00000197177.15	373.568	0.590353	0.258155	2.28682	0.0222066	0.23457	ENSG00000197177	ADGRA1
5713	ENSG00000144847.13	391.958	-0.511542	0.223887	-2.28482	0.0223231	0.235582	ENSG00000144847	IGSF11
3502	ENSG00000120738.8	4296.63	0.510121	0.223304	2.28442	0.0223467	0.235613	ENSG00000120738	EGR1
4175	ENSG00000130304.17	284.383	0.609929	0.267208	2.2826	0.022454	0.236526	ENSG00000130304	SLC27A1
10372	ENSG00000213741.11	1778.95	0.441256	0.193399	2.28158	0.0225141	0.236939	ENSG00000213741	RPS29
8679	ENSG00000177302.15	2347.91	-0.359576	0.157688	-2.2803	0.02259	0.237349	ENSG00000177302	TOP3A
10405	ENSG00000214176.9	258.149	-0.551751	0.241973	-2.28022	0.0225947	0.237349	ENSG00000214176	PLEKHM1P1
11244	ENSG00000276045.3	904.396	0.426117	0.186952	2.27929	0.02265	0.23771	ENSG00000276045	ORAI1
8768	ENSG00000178295.15	612.15	-0.502714	0.220669	-2.27814	0.0227184	0.238209	ENSG00000178295	GEN1
9490	ENSG00000187186.15	498.219	0.561232	0.246497	2.27684	0.022796	0.238583	ENSG00000187186	AL162231.1
11161	ENSG00000272079.2	458.346	0.49692	0.218239	2.27695	0.0227893	0.238583	ENSG00000272079	AC004233.2
476	ENSG00000050820.17	6444.04	0.350803	0.154199	2.275	0.0229059	0.239513	ENSG00000050820	BCAR1
6554	ENSG00000157800.18	1039.67	-0.393379	0.173048	-2.27324	0.0230119	0.240401	ENSG00000157800	SLC37A3
6132	ENSG00000151327.12	618.322	0.469077	0.206385	2.27283	0.0230367	0.240439	ENSG00000151327	FAM177A1
7625	ENSG00000167283.8	3560.76	0.402203	0.17715	2.27041	0.0231827	0.241741	ENSG00000167283	ATP5MG
9232	ENSG00000184261.5	168.766	0.716993	0.316044	2.26865	0.0232897	0.241971	ENSG00000184261	KCNK12
3987	ENSG00000127564.17	1470.93	0.461369	0.203325	2.26912	0.0232611	0.241971	ENSG00000127564	PKMYT1
4480	ENSG00000133069.17	880.031	0.403935	0.178004	2.26925	0.0232531	0.241971	ENSG00000133069	TMCC2
5981	ENSG00000148606.13	1662.91	-0.407751	0.17971	-2.26894	0.0232722	0.241971	ENSG00000148606	POLR3A
599	ENSG00000063176.16	3222.52	0.388371	0.171307	2.2671	0.023384	0.242521	ENSG00000063176	SPHK2
9647	ENSG00000196090.12	2290.45	-0.36707	0.161938	-2.26673	0.0234066	0.242521	ENSG00000196090	PTPRT
6668	ENSG00000159267.15	1036.26	-0.39731	0.175257	-2.26701	0.0233895	0.242521	ENSG00000159267	HLCS
2035	ENSG00000104131.13	1607.03	0.405801	0.179095	2.26584	0.0234613	0.242867	ENSG00000104131	EIF3J
6543	ENSG00000157600.12	2215.62	-0.395551	0.17461	-2.26534	0.0234918	0.242962	ENSG00000157600	TMEM164
10936	ENSG00000255737.2	561.576	0.442836	0.195547	2.2646	0.0235371	0.24321	ENSG00000255737	AGAP2-AS1
1394	ENSG00000092096.17	6064.63	0.365608	0.161484	2.26405	0.0235711	0.24334	ENSG00000092096	SLC22A17
9429	ENSG00000186197.15	4314.52	-0.342766	0.151442	-2.26335	0.0236143	0.243565	ENSG00000186197	EDARADD
10402	ENSG00000214114.9	275.171	0.651084	0.287857	2.26183	0.0237077	0.243691	ENSG00000214114	MYCBP
4096	ENSG00000129159.9	417.257	0.499031	0.220626	2.26189	0.0237043	0.243691	ENSG00000129159	KCNC1
11033	ENSG00000261221.3	1969.77	0.449635	0.198794	2.26181	0.0237092	0.243691	ENSG00000261221	ZNF865
7588	ENSG00000166974.13	1867.2	-0.393282	0.173883	-2.26176	0.0237121	0.243691	ENSG00000166974	MAPRE2
770	ENSG00000069424.15	279.971	0.606675	0.268412	2.26024	0.0238065	0.243781	ENSG00000069424	KCNAB2
6782	ENSG00000160703.16	1091.8	0.487238	0.21553	2.26065	0.0237808	0.243781	ENSG00000160703	NLRX1
6879	ENSG00000162066.15	2593.03	0.437433	0.193513	2.26049	0.023791	0.243781	ENSG00000162066	AMDHD2
8293	ENSG00000172932.16	1901.86	0.38107	0.168524	2.26123	0.0237451	0.243781	ENSG00000172932	ANKRD13D
7419	ENSG00000165802.23	3547.51	0.36075	0.159701	2.25892	0.0238885	0.244401	ENSG00000165802	NSMF
6783	ENSG00000160710.17	6827.42	-0.342604	0.151784	-2.25719	0.0239964	0.245284	ENSG00000160710	ADAR
740	ENSG00000068137.15	2532.63	0.451322	0.200048	2.25607	0.0240661	0.245699	ENSG00000068137	PLEKHH3
4970	ENSG00000137288.10	1508.14	0.401945	0.178182	2.25581	0.0240826	0.245699	ENSG00000137288	UQCC2
5087	ENSG00000138375.13	873.23	-0.398561	0.176706	-2.25551	0.0241016	0.245699	ENSG00000138375	SMARCAL1
8362	ENSG00000173653.8	1299.9	0.486713	0.215899	2.25436	0.0241738	0.246214	ENSG00000173653	RCE1
1793	ENSG00000101443.18	448.016	0.502972	0.223163	2.25383	0.0242071	0.246333	ENSG00000101443	WFDC2
3138	ENSG00000116138.13	389.375	-0.602459	0.267469	-2.25244	0.0242942	0.246998	ENSG00000116138	DNAJC16
3718	ENSG00000124194.17	1349.1	0.407969	0.181168	2.25188	0.0243297	0.247139	ENSG00000124194	GDAP1L1
11270	ENSG00000277701.5	480.604	-0.478905	0.212903	-2.24941	0.0244866	0.24851	ENSG00000277701	AC159540.2
4320	ENSG00000131495.9	841.932	0.415395	0.184757	2.24834	0.0245546	0.248819	ENSG00000131495	NDUFA2
10733	ENSG00000241015.2	363.562	-0.497273	0.221186	-2.24821	0.024563	0.248819	ENSG00000241015	TPM3P9
10744	ENSG00000241489.8	282.971	-0.545926	0.24286	-2.2479	0.0245825	0.248819	ENSG00000241489	AC244197.3
10776	ENSG00000243279.4	5211.62	0.382841	0.170591	2.24421	0.0248188	0.250987	ENSG00000243279	PRAF2
29	ENSG00000003756.17	2636.79	-0.345336	0.153964	-2.24297	0.0248987	0.251572	ENSG00000003756	RBM5
9146	ENSG00000183444.10	210.908	0.589815	0.263188	2.24104	0.0250237	0.252164	ENSG00000183444	OR7E38P
2173	ENSG00000105329.10	1053.03	0.541515	0.241634	2.24106	0.0250223	0.252164	ENSG00000105329	TGFB1
2330	ENSG00000106628.10	7795.86	0.328109	0.146403	2.24113	0.0250177	0.252164	ENSG00000106628	POLD2
3338	ENSG00000118579.13	1286.98	0.383357	0.171096	2.2406	0.0250521	0.252227	ENSG00000118579	MED28
1727	ENSG00000101004.15	1639.05	-0.3862	0.172392	-2.24024	0.0250755	0.252239	ENSG00000101004	NINL
4944	ENSG00000137133.11	1423.42	0.373197	0.166677	2.23904	0.0251534	0.252799	ENSG00000137133	HINT2
11009	ENSG00000260260.1	232.728	0.575838	0.257249	2.23845	0.0251919	0.252964	ENSG00000260260	SNHG19
9250	ENSG00000184470.21	982.663	0.391008	0.174707	2.23808	0.025216	0.252982	ENSG00000184470	TXNRD2
8897	ENSG00000180096.12	208.595	0.606518	0.271048	2.23768	0.0252422	0.253021	ENSG00000180096	SEPTIN1
10795	ENSG00000243989.9	693.756	0.416025	0.185995	2.23675	0.0253026	0.253404	ENSG00000243989	ACY1
7684	ENSG00000167685.15	2075.69	0.447691	0.20019	2.23633	0.02533	0.253456	ENSG00000167685	ZNF444
2607	ENSG00000110063.10	913.113	0.393359	0.175937	2.2358	0.0253648	0.253582	ENSG00000110063	DCPS
6585	ENSG00000158164.7	325.524	0.562684	0.251877	2.23396	0.0254856	0.254566	ENSG00000158164	TMSB15A
9029	ENSG00000182173.13	2315.03	0.405109	0.18144	2.23275	0.0255658	0.255142	ENSG00000182173	TSEN54
9565	ENSG00000188338.15	1880.16	0.41531	0.186138	2.2312	0.0256681	0.255534	ENSG00000188338	SLC38A3
3992	ENSG00000127616.19	10677.7	0.384295	0.172242	2.23113	0.0256723	0.255534	ENSG00000127616	SMARCA4
2367	ENSG00000107185.10	3015.78	-0.34205	0.153292	-2.23137	0.0256568	0.255534	ENSG00000107185	RGP1
3957	ENSG00000126934.14	8457.78	0.401791	0.180168	2.23009	0.0257414	0.255774	ENSG00000126934	MAP2K2
9599	ENSG00000188785.12	206.526	-0.628324	0.281728	-2.23025	0.0257307	0.255774	ENSG00000188785	ZNF548
7332	ENSG00000165171.11	560.514	0.438274	0.196592	2.22936	0.02579	0.25586	ENSG00000165171	METTL27
7321	ENSG00000165066.13	9832.28	0.323865	0.145278	2.22928	0.025795	0.25586	ENSG00000165066	NKX6-3
2780	ENSG00000112139.16	253.478	0.645116	0.289571	2.22783	0.0258918	0.256134	ENSG00000112139	MDGA1
6331	ENSG00000154358.21	470.803	0.62758	0.281747	2.22746	0.0259165	0.256134	ENSG00000154358	OBSCN
1037	ENSG00000079313.15	1998.49	0.459819	0.206422	2.22757	0.025909	0.256134	ENSG00000079313	REXO1
3814	ENSG00000125505.17	5659.3	0.390816	0.175382	2.22836	0.0258562	0.256134	ENSG00000125505	MBOAT7
600	ENSG00000063177.13	16372.9	0.324202	0.145566	2.22718	0.025935	0.256134	ENSG00000063177	RPL18
4183	ENSG00000130340.16	2691.22	-0.335033	0.150497	-2.22618	0.0260022	0.256575	ENSG00000130340	SNX9
8887	ENSG00000179954.16	194.218	0.604282	0.27168	2.22424	0.0261321	0.25741	ENSG00000179954	SSC5D
1986	ENSG00000103365.15	2881.26	-0.423384	0.190346	-2.22428	0.0261294	0.25741	ENSG00000103365	GGA2
5692	ENSG00000144655.15	922.37	0.397831	0.178919	2.22352	0.0261809	0.257668	ENSG00000144655	CSRNP1
779	ENSG00000069998.12	1593.83	0.395069	0.177775	2.22229	0.0262635	0.258257	ENSG00000069998	HDHD5
9648	ENSG00000196092.14	2116.71	-0.343844	0.154751	-2.22192	0.0262887	0.258283	ENSG00000196092	PAX5
1484	ENSG00000099290.17	1055	-0.378645	0.170469	-2.22119	0.0263383	0.258547	ENSG00000099290	WASHC2A
3817	ENSG00000125533.6	184.845	0.698465	0.314682	2.21959	0.0264467	0.25936	ENSG00000125533	BHLHE23
10531	ENSG00000224877.4	520.239	0.467546	0.210756	2.21842	0.0265264	0.25936	ENSG00000224877	NDUFAF8
9627	ENSG00000189143.9	954.824	0.425926	0.191975	2.21865	0.0265103	0.25936	ENSG00000189143	CLDN4
2037	ENSG00000104142.11	2996.66	0.414151	0.186727	2.21796	0.0265578	0.25936	ENSG00000104142	VPS18
7937	ENSG00000169682.18	5780.77	0.399583	0.180128	2.21833	0.0265322	0.25936	ENSG00000169682	SPNS1
8476	ENSG00000174915.12	2611.19	0.347541	0.156701	2.21786	0.0265647	0.25936	ENSG00000174915	PTDSS2
3716	ENSG00000124181.14	6836.16	-0.338967	0.152851	-2.21762	0.0265805	0.25936	ENSG00000124181	PLCG1
8478	ENSG00000174938.14	20660.2	0.396794	0.178994	2.2168	0.0266368	0.259463	ENSG00000174938	SEZ6L2
596	ENSG00000063015.20	6604.51	0.341198	0.15391	2.21687	0.0266321	0.259463	ENSG00000063015	SEZ6
11135	ENSG00000269821.1	1092.89	0.498363	0.224971	2.21523	0.0267442	0.260287	ENSG00000269821	KCNQ1OT1
10154	ENSG00000204175.5	306.725	0.552158	0.24933	2.21457	0.0267899	0.26051	ENSG00000204175	GPRIN2
6584	ENSG00000158161.16	1054.19	-0.385414	0.174165	-2.21293	0.0269027	0.26122	ENSG00000158161	EYA3
10298	ENSG00000206149.10	984.836	-0.388777	0.175692	-2.21284	0.0269088	0.26122	ENSG00000206149	HERC2P9
7094	ENSG00000163697.17	718.186	-0.451242	0.203979	-2.2122	0.0269528	0.261424	ENSG00000163697	APBB2
4176	ENSG00000130305.17	1756.53	0.422759	0.191249	2.21052	0.0270691	0.262105	ENSG00000130305	NSUN5
9866	ENSG00000197586.13	2628.57	0.367068	0.166055	2.21053	0.0270686	0.262105	ENSG00000197586	ENTPD6
10605	ENSG00000230989.7	2786.01	0.371198	0.167969	2.20992	0.027111	0.262288	ENSG00000230989	HSBP1
4553	ENSG00000133983.16	803.963	0.413977	0.187378	2.20932	0.0271526	0.26241	ENSG00000133983	COX16
9331	ENSG00000185262.9	1429.5	0.383321	0.173533	2.20892	0.0271801	0.26241	ENSG00000185262	UBALD2
4567	ENSG00000134086.8	1955.81	-0.359662	0.162836	-2.20874	0.0271928	0.26241	ENSG00000134086	VHL
5554	ENSG00000143390.17	872.909	-0.391567	0.177323	-2.20821	0.0272296	0.262543	ENSG00000143390	RFX5
9492	ENSG00000187193.9	171.237	3.30951	1.49901	2.20779	0.0272589	0.262603	ENSG00000187193	MT1X
10839	ENSG00000248008.3	263.998	-0.579414	0.262485	-2.20742	0.0272849	0.262631	ENSG00000248008	NRAV
7255	ENSG00000164587.13	9167.42	0.31451	0.142502	2.20705	0.0273103	0.262654	ENSG00000164587	RPS14
9622	ENSG00000189077.11	820.142	0.482831	0.219054	2.20416	0.0275129	0.263711	ENSG00000189077	TMEM120A
990	ENSG00000077348.9	465.878	0.467431	0.212047	2.20437	0.0274984	0.263711	ENSG00000077348	EXOSC5
10301	ENSG00000206503.13	13590.9	0.350749	0.159093	2.20468	0.0274768	0.263711	ENSG00000206503	HLA-A
7510	ENSG00000166436.16	407.946	-0.465567	0.211144	-2.20497	0.0274561	0.263711	ENSG00000166436	TRIM66
9505	ENSG00000187514.16	20040.7	0.341356	0.15493	2.20329	0.0275744	0.263857	ENSG00000187514	PTMA
4260	ENSG00000130856.16	380.25	-0.494256	0.224304	-2.20351	0.027559	0.263857	ENSG00000130856	ZNF236
7263	ENSG00000164620.9	753.649	0.457796	0.208085	2.20004	0.0278041	0.265831	ENSG00000164620	RELL2
11183	ENSG00000272886.6	777.184	-0.391694	0.178095	-2.19935	0.027853	0.266075	ENSG00000272886	DCP1A
3193	ENSG00000116691.11	1266.9	0.441147	0.200613	2.199	0.0278778	0.266089	ENSG00000116691	MIIP
8530	ENSG00000175414.7	1626.1	-0.352734	0.160546	-2.19709	0.0280138	0.267163	ENSG00000175414	ARL10
844	ENSG00000072121.16	1583.48	-0.387984	0.176687	-2.19588	0.0281005	0.267766	ENSG00000072121	ZFYVE26
5474	ENSG00000142634.13	1624.68	0.365313	0.166443	2.19482	0.0281765	0.268266	ENSG00000142634	EFHD2
2629	ENSG00000110344.10	1561.59	-0.357595	0.162964	-2.19433	0.028212	0.268379	ENSG00000110344	UBE4A
879	ENSG00000073350.14	10499.4	0.376158	0.171545	2.19276	0.0283246	0.269226	ENSG00000073350	LLGL2
9957	ENSG00000198218.11	1912.98	-0.345183	0.15745	-2.19234	0.0283552	0.269291	ENSG00000198218	QRICH1
10364	ENSG00000213638.6	483.814	0.534999	0.244084	2.19187	0.0283891	0.269329	ENSG00000213638	ADAT3
2119	ENSG00000104897.10	3123.57	0.358126	0.163425	2.19138	0.0284243	0.269329	ENSG00000104897	SF3A2
1843	ENSG00000102003.11	23495.1	0.342755	0.156416	2.1913	0.0284301	0.269329	ENSG00000102003	SYP
10424	ENSG00000214706.10	2144.23	0.389356	0.177786	2.19003	0.0285222	0.269882	ENSG00000214706	IFRD2
7434	ENSG00000165915.14	2806.56	0.380159	0.173627	2.18951	0.0285596	0.269882	ENSG00000165915	SLC39A13
2827	ENSG00000112624.12	781.211	-0.399075	0.182249	-2.18973	0.0285441	0.269882	ENSG00000112624	BICRAL
8619	ENSG00000176531.10	2373.93	0.422269	0.192953	2.18845	0.0286367	0.270387	ENSG00000176531	PHLDB3
11251	ENSG00000276570.1	288.88	0.549534	0.251267	2.18705	0.0287386	0.270899	ENSG00000276570	AC010327.6
6723	ENSG00000160145.15	197.303	-0.748211	0.342102	-2.1871	0.0287354	0.270899	ENSG00000160145	KALRN
9196	ENSG00000183856.11	2732.83	-0.357563	0.163652	-2.1849	0.0288962	0.27216	ENSG00000183856	IQGAP3
4383	ENSG00000132326.12	741.102	-0.416345	0.190602	-2.18437	0.028935	0.2723	ENSG00000132326	PER2
9072	ENSG00000182648.13	851.408	0.444152	0.203367	2.18399	0.0289628	0.272336	ENSG00000182648	LINC01006
785	ENSG00000070061.16	1443.41	-0.352843	0.161604	-2.18338	0.0290077	0.272533	ENSG00000070061	ELP1
6773	ENSG00000160602.14	719.049	-0.428974	0.196517	-2.18289	0.0290442	0.272652	ENSG00000160602	NEK8
1112	ENSG00000082641.16	6271.92	-0.346649	0.159051	-2.17949	0.0292952	0.274781	ENSG00000082641	NFE2L1
409	ENSG00000042445.14	602.888	-0.419119	0.192348	-2.17896	0.0293346	0.274924	ENSG00000042445	RETSAT
4980	ENSG00000137409.19	7757.27	0.344014	0.15797	2.17772	0.029427	0.275564	ENSG00000137409	MTCH1
3541	ENSG00000121351.8	789.996	-0.528062	0.242778	-2.17508	0.0296241	0.277181	ENSG00000121351	IAPP
11311	ENSG00000280287.1	184.964	0.640686	0.29477	2.17351	0.029742	0.278056	ENSG00000280287	AC131212.3
1644	ENSG00000100461.18	2747.3	-0.345948	0.159223	-2.17272	0.0298013	0.278382	ENSG00000100461	RBM23
10876	ENSG00000250644.3	781.714	0.473431	0.218028	2.17143	0.0298988	0.279063	ENSG00000250644	AC068580.4
5338	ENSG00000140990.15	2248.04	0.338215	0.155786	2.17102	0.02993	0.279126	ENSG00000140990	NDUFB10
9615	ENSG00000188994.13	1073.4	0.494831	0.228013	2.17019	0.0299927	0.2794	ENSG00000188994	ZNF292
8973	ENSG00000181392.17	974.203	0.468003	0.215768	2.16901	0.030082	0.2794	ENSG00000181392	SYNE4
2267	ENSG00000106009.16	1326.28	0.42148	0.194274	2.16952	0.0300435	0.2794	ENSG00000106009	BRAT1
3082	ENSG00000115649.16	2569.07	0.406256	0.187299	2.16903	0.0300806	0.2794	ENSG00000115649	CNPPD1
311	ENSG00000025770.19	4639.99	0.381649	0.175898	2.16972	0.0300282	0.2794	ENSG00000025770	NCAPH2
3922	ENSG00000126460.11	700.108	0.467154	0.215449	2.16828	0.0301371	0.279642	ENSG00000126460	PRRG2
6663	ENSG00000159214.13	625.284	0.4281	0.197461	2.16802	0.0301572	0.279642	ENSG00000159214	CCDC24
10699	ENSG00000238105.7	746.52	-0.441056	0.203681	-2.16543	0.0303546	0.281243	ENSG00000238105	GOLGA2P5
7414	ENSG00000165752.17	459.009	0.439278	0.202893	2.16508	0.0303818	0.281267	ENSG00000165752	STK32C
1708	ENSG00000100897.18	2432.49	-0.331307	0.153115	-2.16378	0.030481	0.281955	ENSG00000100897	DCAF11
1449	ENSG00000095564.14	1343.6	-0.356493	0.164785	-2.16339	0.0305115	0.282008	ENSG00000095564	BTAF1
5291	ENSG00000140464.20	1188.85	0.42992	0.199081	2.15952	0.0308096	0.282931	ENSG00000140464	PML
3746	ENSG00000124493.14	571.436	0.425979	0.197263	2.15945	0.0308154	0.282931	ENSG00000124493	GRM4
913	ENSG00000074855.11	890.508	0.420934	0.19491	2.15963	0.030801	0.282931	ENSG00000074855	ANO8
7043	ENSG00000163463.13	3830.21	0.367762	0.17015	2.16139	0.030665	0.282931	ENSG00000163463	KRTCAP2
8489	ENSG00000175061.18	4381.8	0.36596	0.169521	2.15879	0.0308663	0.282931	ENSG00000175061	SNHG29
1454	ENSG00000095932.7	1369.81	0.359909	0.166572	2.16068	0.0307201	0.282931	ENSG00000095932	SMIM24
1183	ENSG00000085552.17	3303.79	0.356862	0.165178	2.16047	0.0307364	0.282931	ENSG00000085552	IGSF9
7679	ENSG00000167657.14	2872.67	0.356205	0.164855	2.16071	0.0307177	0.282931	ENSG00000167657	DAPK3
9730	ENSG00000196576.15	16149	0.332408	0.153784	2.16152	0.030655	0.282931	ENSG00000196576	PLXNB2
10218	ENSG00000204634.12	478.227	-0.434007	0.201045	-2.15875	0.0308694	0.282931	ENSG00000204634	TBC1D8
7165	ENSG00000164048.14	322.702	-0.48961	0.226823	-2.15856	0.0308846	0.282931	ENSG00000164048	ZNF589
9438	ENSG00000186395.8	861.784	0.431588	0.200187	2.15593	0.0310894	0.284516	ENSG00000186395	KRT10
5629	ENSG00000143947.14	5833.91	0.347958	0.161414	2.15569	0.0311077	0.284516	ENSG00000143947	RPS27A
6009	ENSG00000149115.14	765.843	0.431904	0.20045	2.15467	0.0311875	0.284822	ENSG00000149115	TNKS1BP1
11261	ENSG00000277200.1	2172.14	0.409309	0.189967	2.15463	0.031191	0.284822	ENSG00000277200	AC005696.4
3154	ENSG00000116251.11	6468.58	0.311911	0.144853	2.1533	0.031295	0.285375	ENSG00000116251	RPL22
2049	ENSG00000104299.15	441.536	-0.450785	0.209354	-2.15322	0.0313018	0.285375	ENSG00000104299	INTS9
7561	ENSG00000166833.22	1333.71	-0.370273	0.172005	-2.15269	0.0313434	0.285526	ENSG00000166833	NAV2
4195	ENSG00000130479.11	3417.63	0.419213	0.194863	2.15132	0.0314509	0.285591	ENSG00000130479	MAP1S
5066	ENSG00000138111.14	1783.86	0.386222	0.179507	2.15157	0.0314314	0.285591	ENSG00000138111	MFSD13A
2730	ENSG00000111676.15	8780.47	0.380025	0.176617	2.15169	0.031422	0.285591	ENSG00000111676	ATN1
3829	ENSG00000125656.11	1985.82	0.363494	0.168943	2.15158	0.0314308	0.285591	ENSG00000125656	CLPP
3808	ENSG00000125458.7	1251.33	0.416794	0.193774	2.15094	0.0314813	0.28564	ENSG00000125458	NT5C
7705	ENSG00000167815.12	14119.3	0.337009	0.156756	2.14989	0.0315638	0.28616	ENSG00000167815	PRDX2
1171	ENSG00000085224.23	1879.46	0.335584	0.156203	2.14839	0.0316829	0.287011	ENSG00000085224	ATRX
11186	ENSG00000273018.7	237.591	-0.531999	0.247813	-2.14678	0.0318112	0.287944	ENSG00000273018	FAM106A
11058	ENSG00000262814.8	3048.58	0.428456	0.199686	2.14565	0.0319007	0.288296	ENSG00000262814	MRPL12
10769	ENSG00000242612.7	931.004	0.394835	0.183993	2.14593	0.0318786	0.288296	ENSG00000242612	DECR2
10433	ENSG00000214999.3	460.959	-0.584088	0.272468	-2.14369	0.0320575	0.289484	ENSG00000214999	AC129492.1
3070	ENSG00000115504.15	612.058	0.42963	0.200675	2.14092	0.0322803	0.291033	ENSG00000115504	EHBP1
5488	ENSG00000142765.18	4185.44	0.383978	0.179331	2.14117	0.0322606	0.291033	ENSG00000142765	SYTL1
1431	ENSG00000094914.14	1651.76	0.350917	0.163938	2.14055	0.0323101	0.291072	ENSG00000094914	AAAS
11349	ENSG00000284976.1	990.976	0.504438	0.235752	2.1397	0.032379	0.291434	ENSG00000284976	BX255925.3
9248	ENSG00000184451.5	1108.47	0.446908	0.208913	2.1392	0.0324194	0.291434	ENSG00000184451	CCR10
6604	ENSG00000158467.16	1031.66	-0.367165	0.171644	-2.13911	0.032427	0.291434	ENSG00000158467	AHCYL2
1499	ENSG00000099785.10	463.714	0.519619	0.242987	2.13847	0.0324789	0.29167	ENSG00000099785	MARCHF2
1711	ENSG00000100908.14	660.431	0.442276	0.206862	2.13802	0.0325149	0.291763	ENSG00000100908	EMC9
4131	ENSG00000129654.8	1857.79	0.381897	0.178665	2.1375	0.0325572	0.291912	ENSG00000129654	FOXJ1
1143	ENSG00000083845.9	16103.9	0.327643	0.153355	2.1365	0.0326386	0.292412	ENSG00000083845	RPS5
4990	ENSG00000137496.18	340.177	-0.483412	0.226336	-2.13582	0.0326943	0.292681	ENSG00000137496	IL18BP
156	ENSG00000008710.20	9755.92	0.437656	0.204947	2.13546	0.0327235	0.292712	ENSG00000008710	PKD1
4838	ENSG00000136295.15	2817.91	0.364601	0.170789	2.13481	0.0327769	0.292959	ENSG00000136295	TTYH3
2410	ENSG00000107816.17	488.589	0.430681	0.202004	2.13205	0.0330031	0.294449	ENSG00000107816	LZTS2
5917	ENSG00000147684.9	1737.4	0.366596	0.171963	2.13183	0.0330211	0.294449	ENSG00000147684	NDUFB9
6275	ENSG00000153406.13	1998.99	0.365231	0.171297	2.13215	0.0329947	0.294449	ENSG00000153406	NMRAL1
2154	ENSG00000105204.14	1774.52	0.383878	0.180119	2.13125	0.0330683	0.294639	ENSG00000105204	DYRK1B
2202	ENSG00000105520.10	4658.62	0.394498	0.18532	2.12874	0.0332756	0.294918	ENSG00000105520	PLPPR2
7461	ENSG00000166145.14	9194.32	0.327838	0.153946	2.12956	0.0332076	0.294918	ENSG00000166145	SPINT1
2604	ENSG00000110047.18	4862.72	0.315363	0.14815	2.12868	0.033281	0.294918	ENSG00000110047	EHD1
8523	ENSG00000175329.13	5859.13	-0.338319	0.158906	-2.12906	0.0332496	0.294918	ENSG00000175329	ISX
7812	ENSG00000168610.15	2233.22	-0.348013	0.163419	-2.12958	0.0332059	0.294918	ENSG00000168610	STAT3
1615	ENSG00000100354.21	1005.48	-0.361427	0.169657	-2.13034	0.0331435	0.294918	ENSG00000100354	TNRC6B
7520	ENSG00000166478.10	302.591	-0.601555	0.282432	-2.12991	0.033179	0.294918	ENSG00000166478	ZNF143
5661	ENSG00000144354.14	353.396	0.53017	0.249199	2.1275	0.0333788	0.295448	ENSG00000144354	CDCA7
8420	ENSG00000174326.14	733.329	0.428526	0.201496	2.12672	0.033443	0.295448	ENSG00000174326	SLC16A11
8237	ENSG00000172336.5	1242.21	0.350224	0.164668	2.12685	0.0334327	0.295448	ENSG00000172336	POP7
8960	ENSG00000181090.21	1971.24	-0.341717	0.160679	-2.12671	0.0334445	0.295448	ENSG00000181090	EHMT1
5478	ENSG00000142669.15	1613.94	0.375884	0.176809	2.12594	0.0335085	0.295784	ENSG00000142669	SH3BGRL3
10269	ENSG00000205542.11	8846.39	0.390155	0.183618	2.12482	0.0336015	0.296146	ENSG00000205542	TMSB4X
7285	ENSG00000164828.18	1351.7	-0.396715	0.186682	-2.12508	0.03358	0.296146	ENSG00000164828	SUN1
5850	ENSG00000146828.18	2505.6	0.434451	0.20466	2.12279	0.0337713	0.296771	ENSG00000146828	SLC12A9
4461	ENSG00000132879.14	927.248	0.405753	0.191102	2.12323	0.0337349	0.296771	ENSG00000132879	FBXO44
7770	ENSG00000168268.11	10063.3	0.34384	0.161935	2.12332	0.0337269	0.296771	ENSG00000168268	NT5DC2
3136	ENSG00000116128.11	2090.79	-0.329988	0.155455	-2.12273	0.0337767	0.296771	ENSG00000116128	BCL9
4501	ENSG00000133250.14	849.259	0.439001	0.206915	2.12165	0.0338668	0.297334	ENSG00000133250	ZNF414
9399	ENSG00000185883.12	16241.7	0.343715	0.162183	2.1193	0.0340647	0.29884	ENSG00000185883	ATP6V0C
4008	ENSG00000127948.16	4829.36	0.330515	0.156138	2.11681	0.0342756	0.300325	ENSG00000127948	POR
4437	ENSG00000132680.11	1442.74	-0.342403	0.161764	-2.11668	0.0342867	0.300325	ENSG00000132680	KHDC4
6223	ENSG00000152556.17	1788.02	-0.362787	0.171514	-2.11521	0.0344122	0.301193	ENSG00000152556	PFKM
3823	ENSG00000125633.11	824.318	-0.378336	0.178894	-2.11486	0.0344416	0.301218	ENSG00000125633	CCDC93
2234	ENSG00000105722.10	672.522	0.428813	0.203018	2.11219	0.0346702	0.302058	ENSG00000105722	ERF
2373	ENSG00000107281.10	5496.99	0.390793	0.184973	2.1127	0.0346261	0.302058	ENSG00000107281	NPDC1
6918	ENSG00000162430.17	7115.19	0.360273	0.170512	2.11289	0.0346098	0.302058	ENSG00000162430	SELENON
10569	ENSG00000227500.10	2632.19	0.359207	0.170046	2.11242	0.0346508	0.302058	ENSG00000227500	SCAMP4
6040	ENSG00000149476.15	1887.39	0.358552	0.169668	2.11325	0.0345791	0.302058	ENSG00000149476	TKFC
10466	ENSG00000216490.4	775.296	0.44479	0.210627	2.11174	0.0347086	0.302161	ENSG00000216490	IFI30
11035	ENSG00000261342.1	181.824	0.678745	0.321625	2.11036	0.0348273	0.302499	ENSG00000261342	AC006538.1
6792	ENSG00000160767.21	5569.66	0.408984	0.193763	2.11074	0.0347946	0.302499	ENSG00000160767	FAM189B
10480	ENSG00000220842.6	1808.64	0.398795	0.188979	2.11026	0.0348356	0.302499	ENSG00000220842	RPL21P16
7595	ENSG00000167065.13	270.705	-0.50417	0.238937	-2.11005	0.0348536	0.302499	ENSG00000167065	DUSP18
7078	ENSG00000163625.16	1421.85	-0.374709	0.177686	-2.10882	0.0349599	0.30319	ENSG00000163625	WDFY3
618	ENSG00000064309.14	798.524	-0.43552	0.206655	-2.10747	0.0350767	0.303971	ENSG00000064309	CDON
11347	ENSG00000284874.1	3606.75	0.426429	0.202459	2.10625	0.0351828	0.304659	ENSG00000284874	AC000093.1
6804	ENSG00000160888.7	3178.31	0.31746	0.150772	2.10557	0.035242	0.304708	ENSG00000160888	IER2
3243	ENSG00000117262.19	835.277	-0.375184	0.178164	-2.10583	0.0352188	0.304708	ENSG00000117262	GPR89A
1270	ENSG00000088538.13	840.549	-0.385163	0.182958	-2.1052	0.0352742	0.304755	ENSG00000088538	DOCK3
4054	ENSG00000128602.11	199.569	0.572603	0.272128	2.10417	0.0353635	0.305295	ENSG00000128602	SMO
7659	ENSG00000167536.14	2606.65	0.351541	0.167248	2.10191	0.0355608	0.306766	ENSG00000167536	DHRS13
4732	ENSG00000135519.8	562.047	0.53204	0.25319	2.10135	0.0356103	0.306868	ENSG00000135519	KCNH3
10292	ENSG00000205903.7	2232.53	0.397925	0.189383	2.10116	0.0356265	0.306868	ENSG00000205903	ZNF316
3684	ENSG00000123607.15	374.161	0.466754	0.222352	2.09917	0.035802	0.308146	ENSG00000123607	TTC21B
11191	ENSG00000273117.1	288.019	-0.556893	0.265464	-2.09781	0.0359218	0.308944	ENSG00000273117	AC144652.1
2854	ENSG00000112902.12	823.087	-0.371318	0.177069	-2.09702	0.0359916	0.309311	ENSG00000112902	SEMA5A
6053	ENSG00000149599.15	548.428	0.442344	0.21113	2.09513	0.0361598	0.310288	ENSG00000149599	DUSP15
4440	ENSG00000132716.19	2480.09	-0.346108	0.165181	-2.09533	0.0361415	0.310288	ENSG00000132716	DCAF8
4519	ENSG00000133597.11	3477.23	0.352143	0.168123	2.09455	0.0362106	0.31049	ENSG00000133597	ADCK2
1517	ENSG00000099904.16	1692.14	0.407262	0.194527	2.0936	0.0362957	0.310751	ENSG00000099904	ZDHHC8
9956	ENSG00000198208.12	957.823	0.396089	0.189166	2.09387	0.0362717	0.310751	ENSG00000198208	RPS6KL1
3882	ENSG00000125967.17	2582.04	0.348156	0.166428	2.09193	0.0364448	0.311793	ENSG00000125967	NECAB3
2544	ENSG00000109113.20	418.86	0.456988	0.218589	2.09063	0.0365616	0.312149	ENSG00000109113	RAB34
606	ENSG00000063587.15	461.9	-0.473822	0.226615	-2.09087	0.0365398	0.312149	ENSG00000063587	ZNF275
10894	ENSG00000253389.2	314.907	-0.552942	0.264496	-2.09055	0.0365686	0.312149	ENSG00000253389	AC113133.1
8244	ENSG00000172379.21	3684.13	-0.346301	0.165683	-2.09014	0.0366049	0.312225	ENSG00000172379	ARNT2
7753	ENSG00000168118.12	417.209	0.453901	0.217271	2.08911	0.0366981	0.312755	ENSG00000168118	RAB4A
9033	ENSG00000182196.13	4649.62	0.320457	0.153444	2.08843	0.036759	0.312755	ENSG00000182196	ARL6IP4
9861	ENSG00000197555.9	1950.02	-0.340465	0.16304	-2.08823	0.0367769	0.312755	ENSG00000197555	SIPA1L1
9373	ENSG00000185630.19	1330.5	-0.369115	0.176715	-2.08876	0.0367297	0.312755	ENSG00000185630	PBX1
4727	ENSG00000135476.12	1423.98	-0.388523	0.186125	-2.08743	0.0368496	0.313139	ENSG00000135476	ESPL1
10518	ENSG00000224032.7	764.347	0.434034	0.208099	2.08571	0.0370048	0.314023	ENSG00000224032	EPB41L4A-AS1
8271	ENSG00000172731.14	3893.96	0.315323	0.151186	2.08567	0.0370088	0.314023	ENSG00000172731	LRRC20
2177	ENSG00000105357.18	9333.28	0.367971	0.176548	2.08425	0.037137	0.314877	ENSG00000105357	MYH14
8685	ENSG00000177380.14	1705.64	0.442352	0.212368	2.08295	0.037256	0.31565	ENSG00000177380	PPFIA3
10968	ENSG00000257949.7	497.402	0.418936	0.201358	2.08055	0.0374753	0.317073	ENSG00000257949	TEN1
3938	ENSG00000126749.16	652.672	0.398518	0.191579	2.08018	0.0375094	0.317073	ENSG00000126749	EMG1
3714	ENSG00000124172.10	7128.82	0.371441	0.178564	2.08015	0.0375117	0.317073	ENSG00000124172	ATP5F1E
3175	ENSG00000116539.13	2462.41	-0.334929	0.161032	-2.07989	0.0375353	0.317073	ENSG00000116539	ASH1L
11213	ENSG00000274070.2	4450.44	0.391055	0.188071	2.0793	0.03759	0.317124	ENSG00000274070	CASTOR2
3895	ENSG00000126070.20	592.527	-0.404597	0.194591	-2.07922	0.037597	0.317124	ENSG00000126070	AGO3
3562	ENSG00000121753.12	861.936	0.412272	0.198556	2.07635	0.0378617	0.318178	ENSG00000121753	ADGRB2
7609	ENSG00000167173.19	3841.78	0.365701	0.176048	2.07728	0.037776	0.318178	ENSG00000167173	C15orf39
8273	ENSG00000172757.13	26099.5	0.314059	0.151206	2.07703	0.0377989	0.318178	ENSG00000172757	CFL1
10909	ENSG00000254413.8	591.843	-0.395568	0.190461	-2.0769	0.0378106	0.318178	ENSG00000254413	CHKB-CPT1B
5690	ENSG00000144645.14	535.2	-0.483951	0.233066	-2.07645	0.0378525	0.318178	ENSG00000144645	OSBPL10
3734	ENSG00000124313.17	289.479	0.570976	0.275299	2.07402	0.0380772	0.319753	ENSG00000124313	IQSEC2
3858	ENSG00000125841.13	7177.65	0.348554	0.168142	2.07297	0.038175	0.320338	ENSG00000125841	NRSN2
4234	ENSG00000130734.10	2133.11	0.455867	0.220095	2.07123	0.0383378	0.321467	ENSG00000130734	ATG4D
9710	ENSG00000196465.10	2667.13	0.328038	0.158431	2.07053	0.0384023	0.321771	ENSG00000196465	MYL6B
5732	ENSG00000145214.14	1303.24	0.423777	0.204756	2.06967	0.0384832	0.321975	ENSG00000145214	DGKQ
7114	ENSG00000163814.8	1492	-0.346426	0.167372	-2.06979	0.0384718	0.321975	ENSG00000163814	CDCP1
1687	ENSG00000100731.16	1117.38	-0.380532	0.184003	-2.06808	0.0386329	0.322991	ENSG00000100731	PCNX1
1627	ENSG00000100401.20	8244.25	0.371814	0.179856	2.06729	0.0387071	0.323373	ENSG00000100401	RANGAP1
1354	ENSG00000090857.14	1561.56	-0.33888	0.164015	-2.06616	0.0388138	0.324027	ENSG00000090857	PDPR
8115	ENSG00000171161.13	2067.85	0.3519	0.170441	2.06464	0.0389572	0.324986	ENSG00000171161	ZNF672
9742	ENSG00000196656.7	1696.02	0.344973	0.167111	2.06433	0.0389865	0.324992	ENSG00000196656	AC004057.1
10921	ENSG00000254986.7	2116.97	0.317289	0.15385	2.06232	0.039177	0.325626	ENSG00000254986	DPP3
1472	ENSG00000097007.19	3174.09	-0.312428	0.151428	-2.06321	0.0390927	0.325626	ENSG00000097007	ABL1
907	ENSG00000074657.14	368.724	-0.457846	0.221988	-2.06248	0.0391621	0.325626	ENSG00000074657	ZNF532
3264	ENSG00000117472.10	2042.76	-0.458045	0.222039	-2.0629	0.0391221	0.325626	ENSG00000117472	TSPAN1
4515	ENSG00000133460.19	505.901	0.422336	0.204908	2.0611	0.0392935	0.326357	ENSG00000133460	SLC2A11
3729	ENSG00000124243.17	240.848	0.513042	0.248983	2.06055	0.0393455	0.326551	ENSG00000124243	BCAS4
8663	ENSG00000177105.10	1380.93	0.389601	0.189177	2.05945	0.0394512	0.32719	ENSG00000177105	RHOG
4474	ENSG00000133027.18	1161.06	0.487645	0.236864	2.05876	0.0395171	0.327259	ENSG00000133027	PEMT
10772	ENSG00000242802.9	1233.95	0.430391	0.209028	2.05901	0.039493	0.327259	ENSG00000242802	AP5Z1
3784	ENSG00000125122.15	248.599	0.587114	0.285414	2.05706	0.0396804	0.328134	ENSG00000125122	LRRC29
4362	ENSG00000132005.9	1488.32	0.355213	0.172675	2.05711	0.0396752	0.328134	ENSG00000132005	RFX1
10220	ENSG00000204673.11	5034.1	0.374984	0.182474	2.05499	0.0398795	0.329541	ENSG00000204673	AKT1S1
6888	ENSG00000162144.10	2703.43	0.401675	0.195813	2.05132	0.0402363	0.332248	ENSG00000162144	CYB561A3
3289	ENSG00000117640.18	1146.48	-0.3423	0.166929	-2.05056	0.0403093	0.33261	ENSG00000117640	MTFR1L
10843	ENSG00000248275.2	305.996	0.494202	0.24114	2.04944	0.0404195	0.332758	ENSG00000248275	TRIM52-AS1
4106	ENSG00000129250.12	2546.51	0.423115	0.206426	2.04972	0.0403916	0.332758	ENSG00000129250	KIF1C
3672	ENSG00000123444.14	713.677	-0.374758	0.182882	-2.04918	0.0404441	0.332758	ENSG00000123444	KBTBD4
11232	ENSG00000275131.3	555.407	-0.442051	0.21566	-2.04976	0.0403881	0.332758	ENSG00000275131	AC241952.1
8835	ENSG00000179178.11	1993.05	0.366074	0.178849	2.04683	0.040675	0.334174	ENSG00000179178	TMEM125
11090	ENSG00000266338.6	889.097	-0.39099	0.191005	-2.04702	0.0406561	0.334174	ENSG00000266338	NBPF15
2887	ENSG00000113387.12	2651.36	0.357502	0.174906	2.04397	0.0409561	0.336242	ENSG00000113387	SUB1
9177	ENSG00000183723.13	2535.85	-0.320389	0.156805	-2.04323	0.0410293	0.3366	ENSG00000183723	CMTM4
5759	ENSG00000145494.12	1588.71	0.332634	0.162856	2.04251	0.0411012	0.336947	ENSG00000145494	NDUFS6
10790	ENSG00000243789.11	189.561	0.565333	0.27696	2.04121	0.04123	0.33729	ENSG00000243789	JMJD7
1908	ENSG00000102871.16	326.797	0.524551	0.257171	2.0397	0.0413804	0.33729	ENSG00000102871	TRADD
341	ENSG00000032444.17	5539.99	0.427911	0.209716	2.04043	0.0413071	0.33729	ENSG00000032444	PNPLA6
3258	ENSG00000117411.16	2629.57	0.378212	0.185322	2.04084	0.0412664	0.33729	ENSG00000117411	B4GALT2
10476	ENSG00000219438.9	876.965	0.367745	0.18034	2.03917	0.0414328	0.33729	ENSG00000219438	TAFA5
858	ENSG00000072506.13	3871.19	0.321093	0.157395	2.04005	0.0413451	0.33729	ENSG00000072506	HSD17B10
6703	ENSG00000159842.15	2792.49	-0.333791	0.163605	-2.04022	0.0413282	0.33729	ENSG00000159842	ABR
1984	ENSG00000103356.18	560.04	-0.397965	0.195168	-2.03909	0.0414409	0.33729	ENSG00000103356	EARS2
1554	ENSG00000100104.13	700.737	-0.405222	0.198685	-2.03952	0.0413986	0.33729	ENSG00000100104	SRRD
9186	ENSG00000183778.17	417.118	-0.470334	0.23069	-2.03881	0.0414688	0.33729	ENSG00000183778	B3GALT5
6570	ENSG00000157978.12	1599.1	-0.480851	0.23568	-2.04027	0.0413233	0.33729	ENSG00000157978	LDLRAP1
1080	ENSG00000081026.19	348.901	0.464474	0.227875	2.03828	0.0415219	0.337332	ENSG00000081026	MAGI3
895	ENSG00000074071.15	3610.93	0.310788	0.152484	2.03817	0.0415333	0.337332	ENSG00000074071	MRPS34
10470	ENSG00000217930.8	556.871	0.416262	0.204272	2.03779	0.0415711	0.337399	ENSG00000217930	PAM16
5814	ENSG00000146232.17	558.428	0.389522	0.191391	2.03522	0.0418291	0.338768	ENSG00000146232	NFKBIE
7874	ENSG00000169100.14	23004	0.291931	0.143423	2.03546	0.0418042	0.338768	ENSG00000169100	SLC25A6
3520	ENSG00000120915.14	755.905	-0.37491	0.18417	-2.03568	0.0417829	0.338768	ENSG00000120915	EPHX2
181	ENSG00000010361.14	1690.52	0.39383	0.193787	2.03228	0.0421252	0.340487	ENSG00000010361	FUZ
6679	ENSG00000159433.12	743.038	-0.36948	0.1818	-2.03234	0.042119	0.340487	ENSG00000159433	STARD9
7657	ENSG00000167528.13	487.469	-0.456915	0.224835	-2.03222	0.0421311	0.340487	ENSG00000167528	ZNF641
1373	ENSG00000091262.15	701.284	0.43736	0.215457	2.02992	0.0423651	0.342136	ENSG00000091262	ABCC6
8877	ENSG00000179889.19	6869.49	-0.317278	0.156493	-2.02742	0.0426191	0.343943	ENSG00000179889	PDXDC1
6015	ENSG00000149187.18	2713.8	-0.311345	0.15359	-2.02712	0.0426502	0.34395	ENSG00000149187	CELF1
11025	ENSG00000260852.1	163.625	-0.677315	0.334255	-2.02634	0.0427295	0.344346	ENSG00000260852	FBXL19-AS1
10664	ENSG00000235590.7	173.4	0.578525	0.285586	2.02574	0.042791	0.344364	ENSG00000235590	GNAS-AS1
9344	ENSG00000185386.15	1072.22	0.429663	0.212102	2.02573	0.0427922	0.344364	ENSG00000185386	MAPK11
2419	ENSG00000107872.12	2311.35	0.458111	0.22636	2.02381	0.0429897	0.344539	ENSG00000107872	FBXL15
10371	ENSG00000213722.9	552.178	0.402244	0.198758	2.02379	0.0429913	0.344539	ENSG00000213722	DDAH2
5442	ENSG00000142156.15	1789.94	0.354187	0.174999	2.02394	0.0429766	0.344539	ENSG00000142156	COL6A1
319	ENSG00000027075.15	3155.4	-0.32014	0.158108	-2.02481	0.0428867	0.344539	ENSG00000027075	PRKCH
5724	ENSG00000145016.16	2584.29	-0.342459	0.169152	-2.02456	0.0429125	0.344539	ENSG00000145016	RUBCN
11134	ENSG00000269743.3	860.907	-0.414092	0.204616	-2.02375	0.0429956	0.344539	ENSG00000269743	SLC25A53
4083	ENSG00000128973.13	3256.77	0.352183	0.174073	2.02319	0.0430535	0.344761	ENSG00000128973	CLN6
3571	ENSG00000121905.10	2595.62	0.313268	0.154973	2.02144	0.043234	0.345791	ENSG00000121905	HPCA
1192	ENSG00000085831.15	2244.87	-0.332189	0.164364	-2.02106	0.0432733	0.345791	ENSG00000085831	TTC39A
4678	ENSG00000135093.13	804.274	-0.373982	0.185016	-2.02135	0.0432432	0.345791	ENSG00000135093	USP30
9773	ENSG00000196876.18	494.411	-0.406141	0.201148	-2.01912	0.0434749	0.347159	ENSG00000196876	SCN8A
9073	ENSG00000182667.14	493.318	-0.425882	0.211174	-2.01673	0.0437232	0.348897	ENSG00000182667	NTM
1207	ENSG00000086200.17	317.696	0.502331	0.249135	2.0163	0.0437689	0.349017	ENSG00000086200	IPO11
11100	ENSG00000267221.3	161.767	0.588883	0.292276	2.01482	0.0439238	0.349207	ENSG00000267221	C17orf113
8977	ENSG00000181444.13	209.276	0.577542	0.286677	2.0146	0.0439461	0.349207	ENSG00000181444	ZNF467
9844	ENSG00000197363.9	265.925	0.486559	0.241513	2.01463	0.0439432	0.349207	ENSG00000197363	ZNF517
6763	ENSG00000160410.15	2531.78	0.386443	0.191783	2.015	0.0439049	0.349207	ENSG00000160410	SHKBP1
7648	ENSG00000167487.12	882.159	0.357797	0.177597	2.01465	0.043941	0.349207	ENSG00000167487	KLHL26
6875	ENSG00000162032.16	1148.97	0.371484	0.184432	2.01421	0.0439879	0.349296	ENSG00000162032	SPSB3
11046	ENSG00000261740.6	221.935	0.526898	0.261836	2.01232	0.0441859	0.349892	ENSG00000261740	BOLA2-SMG1P6
10629	ENSG00000233223.3	514.152	0.464677	0.230898	2.01248	0.0441693	0.349892	ENSG00000233223	AC016876.2
4417	ENSG00000132563.16	1556.06	0.356245	0.177029	2.01235	0.044183	0.349892	ENSG00000132563	REEP2
5249	ENSG00000140043.11	319.129	-0.455267	0.226148	-2.01314	0.0440999	0.349892	ENSG00000140043	PTGR2
9067	ENSG00000182580.3	270.032	0.54165	0.269392	2.01064	0.0443637	0.349988	ENSG00000182580	EPHB3
2288	ENSG00000106268.15	209.249	0.541482	0.269321	2.01054	0.0443736	0.349988	ENSG00000106268	NUDT1
11019	ENSG00000260630.7	742.44	0.410597	0.204126	2.01149	0.0442742	0.349988	ENSG00000260630	SNAI3-AS1
584	ENSG00000061938.19	2451.82	0.405706	0.201798	2.01046	0.0443824	0.349988	ENSG00000061938	TNK2
9296	ENSG00000185000.12	1596.57	0.37065	0.184228	2.0119	0.0442303	0.349988	ENSG00000185000	DGAT1
7395	ENSG00000165655.17	825.371	0.358463	0.17829	2.01056	0.0443717	0.349988	ENSG00000165655	ZNF503
11067	ENSG00000263956.6	605.92	-0.378154	0.18813	-2.01007	0.0444236	0.35007	ENSG00000263956	NBPF11
1584	ENSG00000100242.15	3198	0.370448	0.184367	2.0093	0.0445051	0.35047	ENSG00000100242	SUN2
4916	ENSG00000136925.15	400.773	-0.429794	0.213972	-2.00864	0.0445751	0.350778	ENSG00000136925	TSTD2
4158	ENSG00000130164.14	9915.52	-0.293219	0.146109	-2.00685	0.0447654	0.352033	ENSG00000130164	LDLR
4309	ENSG00000131409.13	343.399	0.556939	0.277775	2.005	0.0449634	0.352742	ENSG00000131409	LRRC4B
11319	ENSG00000281571.2	891.139	0.37692	0.188032	2.00456	0.0450105	0.352742	ENSG00000281571	AC241585.2
4070	ENSG00000128833.13	620.927	-0.376803	0.187942	-2.0049	0.0449742	0.352742	ENSG00000128833	MYO5C
1159	ENSG00000084674.15	839.816	-0.40057	0.199817	-2.00468	0.044997	0.352742	ENSG00000084674	APOB
7552	ENSG00000166780.11	659.968	-0.40438	0.201703	-2.00483	0.0449813	0.352742	ENSG00000166780	BMERB1
5333	ENSG00000140961.14	226.651	0.608934	0.30407	2.00261	0.0452191	0.353575	ENSG00000140961	OSGIN1
5073	ENSG00000138182.14	742.956	0.377512	0.188529	2.00241	0.0452409	0.353575	ENSG00000138182	KIF20B
8131	ENSG00000171298.13	7326.89	0.361623	0.180591	2.00245	0.0452366	0.353575	ENSG00000171298	GAA
1612	ENSG00000100348.10	2986.73	0.32512	0.162313	2.00304	0.045173	0.353575	ENSG00000100348	TXN2
2718	ENSG00000111641.12	985.013	-0.359577	0.179624	-2.00183	0.0453029	0.353817	ENSG00000111641	NOP2
9883	ENSG00000197747.9	1587.84	0.357371	0.178576	2.00123	0.0453672	0.354076	ENSG00000197747	S100A10
6852	ENSG00000161677.12	253.456	0.619906	0.309879	2.00048	0.0454484	0.354278	ENSG00000161677	JOSD2
7293	ENSG00000164898.13	340.104	0.450516	0.225231	2.00024	0.0454742	0.354278	ENSG00000164898	FMC1
2219	ENSG00000105647.19	7952.65	0.316533	0.158256	2.00013	0.0454865	0.354278	ENSG00000105647	PIK3R2
2547	ENSG00000109171.15	826.558	-0.41753	0.208851	-1.99918	0.0455892	0.354835	ENSG00000109171	SLAIN2
8454	ENSG00000174705.13	1173.47	-0.355207	0.177753	-1.99832	0.0456819	0.355314	ENSG00000174705	SH3PXD2B
8333	ENSG00000173402.12	3972.27	-0.298534	0.149434	-1.99776	0.0457431	0.355547	ENSG00000173402	DAG1
3923	ENSG00000126461.15	6218.85	0.373127	0.186855	1.99688	0.0458384	0.355891	ENSG00000126461	SCAF1
7190	ENSG00000164114.19	977.998	0.355064	0.177819	1.99677	0.0458498	0.355891	ENSG00000164114	MAP9
1598	ENSG00000100300.18	158.104	0.632902	0.317209	1.99522	0.046019	0.356233	ENSG00000100300	TSPO
10965	ENSG00000257704.4	412.218	0.541516	0.271383	1.99539	0.0460002	0.356233	ENSG00000257704	INAFM1
8709	ENSG00000177628.16	6819.68	-0.287479	0.14405	-1.99568	0.0459686	0.356233	ENSG00000177628	GBA
718	ENSG00000067369.14	2193.4	-0.310862	0.155764	-1.99572	0.0459644	0.356233	ENSG00000067369	TP53BP1
8722	ENSG00000177732.8	8675.47	0.333539	0.167302	1.99364	0.0461919	0.357328	ENSG00000177732	SOX12
9254	ENSG00000184515.11	176.039	0.631716	0.317011	1.99273	0.0462914	0.357539	ENSG00000184515	BEX5
9863	ENSG00000197562.10	1848.71	0.380225	0.190771	1.99309	0.0462512	0.357539	ENSG00000197562	RAB40C
4372	ENSG00000132199.20	607.712	-0.38069	0.191059	-1.99253	0.0463134	0.357539	ENSG00000132199	ENOSF1
5209	ENSG00000139531.13	543.983	-0.384165	0.192915	-1.99137	0.0464403	0.358276	ENSG00000139531	SUOX
6821	ENSG00000161036.13	2223.59	0.387101	0.194601	1.9892	0.0466788	0.35967	ENSG00000161036	LRWD1
1571	ENSG00000100207.19	1878.6	-0.327068	0.164425	-1.98915	0.0466842	0.35967	ENSG00000100207	TCF20
5462	ENSG00000142459.8	2345.15	0.373425	0.187833	1.98807	0.0468041	0.360107	ENSG00000142459	EVI5L
5189	ENSG00000139343.10	789.456	0.367206	0.1847	1.98812	0.046798	0.360107	ENSG00000139343	SNRPF
1041	ENSG00000079387.14	714.15	-0.360568	0.181437	-1.98729	0.0468899	0.360524	ENSG00000079387	SENP1
9690	ENSG00000196369.11	452.96	0.506641	0.255195	1.98531	0.0471098	0.361895	ENSG00000196369	SRGAP2B
2962	ENSG00000114391.13	5881.09	0.321759	0.162102	1.98492	0.0471531	0.361895	ENSG00000114391	RPL24
9832	ENSG00000197296.6	1816.99	-0.315657	0.159035	-1.98483	0.0471637	0.361895	ENSG00000197296	FITM2
3780	ENSG00000124920.14	4955.75	0.309885	0.156161	1.98439	0.0472119	0.362021	ENSG00000124920	MYRF
8363	ENSG00000173660.12	2105.14	0.324638	0.163664	1.98356	0.0473048	0.362431	ENSG00000173660	UQCRH
3153	ENSG00000116237.16	4364.1	-0.307235	0.154908	-1.98335	0.0473289	0.362431	ENSG00000116237	ICMT
10123	ENSG00000203618.6	1156.88	0.394186	0.198827	1.98256	0.0474169	0.362861	ENSG00000203618	GP1BB
9381	ENSG00000185722.18	2013.81	-0.330238	0.166797	-1.97989	0.0477163	0.364907	ENSG00000185722	ANKFY1
682	ENSG00000066230.12	345.116	-0.437555	0.221143	-1.97861	0.0478603	0.365762	ENSG00000066230	SLC9A3
538	ENSG00000057663.16	520.923	0.427927	0.21642	1.9773	0.048008	0.366198	ENSG00000057663	ATG5
625	ENSG00000064607.17	4772.8	-0.296569	0.149965	-1.9776	0.0479743	0.366198	ENSG00000064607	SUGP2
11133	ENSG00000269713.7	1458.17	-0.318126	0.160893	-1.97725	0.0480139	0.366198	ENSG00000269713	NBPF9
8309	ENSG00000173137.12	603.465	0.455097	0.230301	1.9761	0.0481433	0.366541	ENSG00000173137	ADCK5
11262	ENSG00000277203.1	1233.45	0.348976	0.176619	1.97587	0.0481698	0.366541	ENSG00000277203	F8A1
10691	ENSG00000237649.8	1706.09	-0.332587	0.168337	-1.97572	0.0481864	0.366541	ENSG00000237649	KIFC1
2046	ENSG00000104228.13	661.98	-0.389685	0.197238	-1.97571	0.0481876	0.366541	ENSG00000104228	TRIM35
516	ENSG00000055118.16	11601.9	0.30771	0.15592	1.97351	0.0484374	0.368195	ENSG00000055118	KCNH2
7977	ENSG00000169964.8	541.198	0.397116	0.201418	1.97161	0.0486546	0.369241	ENSG00000169964	TMEM42
2324	ENSG00000106608.17	1273.95	-0.336249	0.170559	-1.97145	0.0486722	0.369241	ENSG00000106608	URGCP
7153	ENSG00000164002.11	248.963	-0.482981	0.24494	-1.97183	0.0486291	0.369241	ENSG00000164002	EXO5
4209	ENSG00000130589.16	2675.49	0.343681	0.174459	1.96998	0.0488404	0.37027	ENSG00000130589	HELZ2
4238	ENSG00000130751.10	222.57	0.634784	0.322432	1.96874	0.0489831	0.371105	ENSG00000130751	NPAS1
11071	ENSG00000264522.6	372.881	-0.474105	0.240992	-1.96731	0.0491475	0.372102	ENSG00000264522	OTUD7B
11064	ENSG00000263465.4	1126.86	0.340449	0.173174	1.96593	0.0493067	0.37306	ENSG00000263465	SRSF8
8052	ENSG00000170619.10	978.225	0.369047	0.18776	1.96552	0.0493536	0.373167	ENSG00000170619	COMMD5
3839	ENSG00000125743.10	2204.28	0.342261	0.174216	1.96458	0.0494629	0.373745	ENSG00000125743	SNRPD2
3074	ENSG00000115525.18	784.774	-0.38312	0.195077	-1.96395	0.0495363	0.374052	ENSG00000115525	ST3GAL5
8379	ENSG00000173825.7	260.035	0.481486	0.245392	1.96211	0.04975	0.374187	ENSG00000173825	TIGD3
9418	ENSG00000186111.10	2316.5	0.337908	0.172218	1.9621	0.0497513	0.374187	ENSG00000186111	PIP5K1C
150	ENSG00000008323.15	1889.61	0.32523	0.165737	1.96233	0.049724	0.374187	ENSG00000008323	PLEKHG6
33	ENSG00000004139.14	7620.66	0.301643	0.153638	1.96334	0.0496069	0.374187	ENSG00000004139	SARM1
5876	ENSG00000147155.11	14679.2	0.288924	0.147194	1.96288	0.0496603	0.374187	ENSG00000147155	EBP
1411	ENSG00000092841.19	11204.8	0.283198	0.144292	1.96268	0.0496834	0.374187	ENSG00000092841	MYL6
961	ENSG00000076351.13	2778.91	0.320654	0.163592	1.96009	0.0499857	0.375701	ENSG00000076351	SLC46A1
8479	ENSG00000174939.11	1153.03	0.445018	0.227293	1.9579	0.0502416	0.377236	ENSG00000174939	ASPHD1
8472	ENSG00000174871.11	8778.72	0.327721	0.167394	1.95778	0.0502562	0.377236	ENSG00000174871	CNIH2
6873	ENSG00000161999.13	2759.84	0.332488	0.169915	1.95679	0.0503718	0.377619	ENSG00000161999	JMJD8
4136	ENSG00000129757.14	3879.77	0.314166	0.160559	1.9567	0.0503822	0.377619	ENSG00000129757	CDKN1C
455	ENSG00000049246.14	684.578	-0.375429	0.191921	-1.95616	0.050446	0.377619	ENSG00000049246	PER3
6325	ENSG00000154305.18	1233.72	0.362655	0.185406	1.95601	0.0504638	0.377619	ENSG00000154305	MIA3
1303	ENSG00000089177.19	578.077	-0.39088	0.199843	-1.95593	0.050473	0.377619	ENSG00000089177	KIF16B
11172	ENSG00000272419.6	712.609	-0.384401	0.196669	-1.95456	0.0506351	0.378583	ENSG00000272419	LINC01145
411	ENSG00000042753.12	3294.57	0.329447	0.168753	1.95224	0.0509092	0.380382	ENSG00000042753	AP2S1
3135	ENSG00000116127.19	501.193	-0.400973	0.20565	-1.94978	0.051202	0.382319	ENSG00000116127	ALMS1
2516	ENSG00000108830.10	193.936	0.565258	0.289959	1.94944	0.0512426	0.382372	ENSG00000108830	RND2
5799	ENSG00000146021.15	334.881	-0.444161	0.227875	-1.94915	0.051278	0.382385	ENSG00000146021	KLHL3
10192	ENSG00000204410.16	650.308	-0.442295	0.226996	-1.94847	0.0513587	0.382737	ENSG00000204410	MSH5
1707	ENSG00000100890.16	317.952	-0.468732	0.240603	-1.94815	0.0513965	0.382768	ENSG00000100890	PRORP
1312	ENSG00000089351.14	2905.65	0.314605	0.161563	1.94725	0.0515046	0.383157	ENSG00000089351	GRAMD1A
6698	ENSG00000159761.15	256.634	0.516956	0.265493	1.94716	0.051516	0.383157	ENSG00000159761	C16orf86
10050	ENSG00000198786.2	156141	0.313032	0.160807	1.94663	0.0515792	0.383376	ENSG00000198786	MT-ND5
8391	ENSG00000173915.16	1090.44	0.39035	0.200578	1.94613	0.0516394	0.383574	ENSG00000173915	ATP5MD
9564	ENSG00000188322.7	3543.9	0.349394	0.179763	1.94364	0.0519394	0.38555	ENSG00000188322	SBK1
7134	ENSG00000163913.12	814.915	-0.399247	0.205453	-1.94325	0.051986	0.385645	ENSG00000163913	IFT122
9108	ENSG00000182983.15	236.674	0.485153	0.249718	1.94281	0.0520393	0.385697	ENSG00000182983	ZNF662
6515	ENSG00000157193.18	637.427	-0.371181	0.191072	-1.94263	0.0520609	0.385697	ENSG00000157193	LRP8
10388	ENSG00000213977.8	970.967	0.357016	0.183995	1.94036	0.0523363	0.387309	ENSG00000213977	TAX1BP3
6953	ENSG00000162736.17	4232.42	-0.287919	0.148391	-1.94027	0.0523464	0.387309	ENSG00000162736	NCSTN
1969	ENSG00000103249.18	6468.59	0.358249	0.184869	1.93785	0.0526414	0.389099	ENSG00000103249	CLCN7
10170	ENSG00000204304.12	1710.22	-0.319037	0.164645	-1.93773	0.0526566	0.389099	ENSG00000204304	PBX2
2578	ENSG00000109685.18	6127.44	-0.290569	0.149996	-1.93718	0.0527235	0.38934	ENSG00000109685	NSD2
2123	ENSG00000104936.19	1441.99	0.442813	0.228623	1.93687	0.0527607	0.389362	ENSG00000104936	DMPK
4224	ENSG00000130707.18	184.52	0.666466	0.344171	1.93644	0.0528142	0.389505	ENSG00000130707	ASS1
8593	ENSG00000176225.14	487.612	-0.423846	0.218937	-1.93593	0.0528768	0.389714	ENSG00000176225	RTTN
7985	ENSG00000170004.17	4140.85	-0.341686	0.176532	-1.93555	0.052923	0.38975	ENSG00000170004	CHD3
5074	ENSG00000138185.20	298.174	-0.492912	0.254693	-1.93532	0.0529513	0.38975	ENSG00000138185	ENTPD1
216	ENSG00000012061.16	1082.55	0.357179	0.184584	1.93505	0.0529844	0.38975	ENSG00000012061	ERCC1
6477	ENSG00000156675.16	3378.09	-0.302276	0.156251	-1.93456	0.0530449	0.389943	ENSG00000156675	RAB11FIP1
10825	ENSG00000246100.4	177.014	-0.582701	0.301292	-1.93401	0.0531119	0.390184	ENSG00000246100	LINC00900
6872	ENSG00000161996.19	1879.5	0.347753	0.179875	1.9333	0.0531992	0.390423	ENSG00000161996	WDR90
7570	ENSG00000166887.16	2106.62	-0.299824	0.155099	-1.93311	0.0532227	0.390423	ENSG00000166887	VPS39
8287	ENSG00000172888.12	717.572	-0.368468	0.190634	-1.93286	0.0532534	0.390423	ENSG00000172888	ZNF621
10520	ENSG00000224078.15	2620.9	-0.295577	0.15295	-1.93251	0.0532967	0.390423	ENSG00000224078	SNHG14
10098	ENSG00000198909.8	742.944	-0.362758	0.187728	-1.93235	0.0533159	0.390423	ENSG00000198909	MAP3K3
6150	ENSG00000151503.13	1929	-0.302734	0.156703	-1.93189	0.0533731	0.390476	ENSG00000151503	NCAPD3
2507	ENSG00000108784.10	3877.15	0.328053	0.169822	1.93174	0.0533916	0.390476	ENSG00000108784	NAGLU
2431	ENSG00000107957.16	1665.44	-0.329968	0.171026	-1.92935	0.053688	0.392187	ENSG00000107957	SH3PXD2A
5325	ENSG00000140854.13	2066.28	0.318925	0.165307	1.92929	0.0536945	0.392187	ENSG00000140854	KATNB1
672	ENSG00000065923.10	759.658	-0.428313	0.222047	-1.92893	0.0537391	0.392261	ENSG00000065923	SLC9A7
2647	ENSG00000110700.7	5963.62	0.344073	0.178421	1.92843	0.0538021	0.392469	ENSG00000110700	RPS13
7944	ENSG00000169714.17	3103.13	0.321749	0.166893	1.92788	0.0538704	0.392716	ENSG00000169714	CNBP
9496	ENSG00000187240.16	188.596	0.524519	0.272146	1.92735	0.0539363	0.392945	ENSG00000187240	DYNC2H1
10588	ENSG00000229117.9	12867.7	0.284103	0.14745	1.92677	0.054008	0.39296	ENSG00000229117	RPL41
8762	ENSG00000178188.14	2654.67	0.323057	0.167671	1.92674	0.0540124	0.39296	ENSG00000178188	SH2B1
1608	ENSG00000100330.16	2047.01	-0.339647	0.176303	-1.9265	0.0540419	0.39296	ENSG00000100330	MTMR3
4284	ENSG00000131116.12	1591.7	0.358602	0.186357	1.92428	0.0543196	0.394727	ENSG00000131116	ZNF428
6007	ENSG00000149091.15	4010.11	0.329947	0.171497	1.92393	0.0543636	0.394795	ENSG00000149091	DGKZ
5809	ENSG00000146112.12	759.473	0.353845	0.183995	1.92313	0.0544643	0.395274	ENSG00000146112	PPP1R18
3345	ENSG00000118705.17	17896	-0.271215	0.141106	-1.92206	0.0545985	0.395768	ENSG00000118705	RPN2
7254	ENSG00000164576.12	951.463	0.336415	0.175031	1.92203	0.0546018	0.395768	ENSG00000164576	SAP30L
3086	ENSG00000115677.17	15620.4	-0.304152	0.158441	-1.91965	0.0549015	0.397687	ENSG00000115677	HDLBP
10189	ENSG00000204394.13	4887.88	0.297179	0.154863	1.91898	0.0549864	0.398049	ENSG00000204394	VARS1
803	ENSG00000070610.14	3884.63	-0.296079	0.154335	-1.91841	0.0550586	0.398318	ENSG00000070610	GBA2
9732	ENSG00000196586.16	1641.69	0.3148	0.164244	1.91666	0.0552814	0.39946	ENSG00000196586	MYO6
2477	ENSG00000108509.21	2267.43	0.386649	0.201762	1.91636	0.0553188	0.39946	ENSG00000108509	CAMTA2
8151	ENSG00000171456.20	3213.13	-0.304602	0.15895	-1.91634	0.0553217	0.39946	ENSG00000171456	ASXL1
430	ENSG00000047578.13	1090.46	-0.349638	0.182479	-1.91604	0.0553597	0.399481	ENSG00000047578	KIAA0556
10071	ENSG00000198840.2	21889.7	0.285281	0.148967	1.91506	0.0554846	0.400129	ENSG00000198840	MT-ND3
2239	ENSG00000105755.8	250.115	0.493856	0.258001	1.91417	0.0555988	0.400699	ENSG00000105755	ETHE1
11178	ENSG00000272655.2	349.296	-0.490973	0.256568	-1.91362	0.0556687	0.400948	ENSG00000272655	POLR2J4
3924	ENSG00000126464.14	3923.99	0.386664	0.20209	1.91333	0.0557063	0.400965	ENSG00000126464	PRR12
2188	ENSG00000105419.18	459.536	0.480779	0.251345	1.91282	0.0557707	0.401176	ENSG00000105419	MEIS3
6768	ENSG00000160539.6	429.633	0.415088	0.217128	1.91172	0.0559118	0.401937	ENSG00000160539	PLPP7
11248	ENSG00000276293.4	3134	-0.291324	0.152413	-1.91141	0.0559517	0.40197	ENSG00000276293	PIP4K2B
3530	ENSG00000121060.18	1606.47	-0.321127	0.168157	-1.90968	0.056174	0.403096	ENSG00000121060	TRIM25
7420	ENSG00000165804.16	420.382	0.398211	0.208531	1.9096	0.056185	0.403096	ENSG00000165804	ZNF219
7791	ENSG00000168411.14	1107.22	-0.350365	0.183498	-1.90937	0.0562147	0.403096	ENSG00000168411	RFWD3
8401	ENSG00000174080.11	4395.35	0.306561	0.160583	1.90905	0.0562557	0.403136	ENSG00000174080	CTSF
2696	ENSG00000111325.16	645.297	0.432012	0.226453	1.90773	0.0564259	0.404102	ENSG00000111325	OGFOD2
9586	ENSG00000188612.12	3212.4	0.32883	0.172458	1.90673	0.0565558	0.404743	ENSG00000188612	SUMO2
3982	ENSG00000127526.15	1934.82	-0.296132	0.155329	-1.90649	0.0565866	0.404743	ENSG00000127526	SLC35E1
6024	ENSG00000149262.17	652.547	-0.354598	0.186129	-1.90512	0.0567648	0.405763	ENSG00000149262	INTS4
4889	ENSG00000136810.13	933.657	0.397695	0.208851	1.9042	0.0568838	0.406149	ENSG00000136810	TXN
8341	ENSG00000173465.8	450.97	0.446619	0.23455	1.90415	0.0568904	0.406149	ENSG00000173465	ZNRD2
10919	ENSG00000254858.10	661.271	0.365059	0.191771	1.90362	0.05696	0.406149	ENSG00000254858	MPV17L2
7421	ENSG00000165810.17	444.068	-0.390722	0.205254	-1.90361	0.0569614	0.406149	ENSG00000165810	BTNL9
348	ENSG00000033178.13	823.597	0.4053	0.212968	1.9031	0.0570275	0.406366	ENSG00000033178	UBA6
10026	ENSG00000198712.1	177939	0.288711	0.151846	1.90134	0.0572568	0.407745	ENSG00000198712	MT-CO2
2632	ENSG00000110400.11	9117.49	0.286827	0.150912	1.90062	0.0573515	0.407938	ENSG00000110400	NECTIN1
4779	ENSG00000135912.11	1273.69	-0.323576	0.17025	-1.90059	0.0573557	0.407938	ENSG00000135912	TTLL4
6388	ENSG00000155265.11	434.624	0.467166	0.246015	1.89893	0.0575734	0.409231	ENSG00000155265	GOLGA7B
8419	ENSG00000174306.21	2282.1	-0.37545	0.197761	-1.89851	0.0576292	0.409372	ENSG00000174306	ZHX3
8529	ENSG00000175390.14	6620.87	0.274596	0.144705	1.89762	0.0577462	0.409718	ENSG00000175390	EIF3F
2086	ENSG00000104679.11	1655.57	0.301752	0.159018	1.89759	0.0577498	0.409718	ENSG00000104679	R3HCC1
90	ENSG00000006194.10	1297.73	-0.332708	0.175423	-1.8966	0.0578801	0.410387	ENSG00000006194	ZNF263
4521	ENSG00000133612.19	4773.06	0.332544	0.175365	1.8963	0.0579206	0.410418	ENSG00000133612	AGAP3
890	ENSG00000073849.15	1762.82	-0.33722	0.177883	-1.89574	0.0579941	0.410684	ENSG00000073849	ST6GAL1
9467	ENSG00000186815.13	2743.75	-0.32449	0.171195	-1.89544	0.0580347	0.410716	ENSG00000186815	TPCN1
4303	ENSG00000131374.14	1812.72	-0.313143	0.165235	-1.89513	0.0580746	0.410742	ENSG00000131374	TBC1D5
7050	ENSG00000163497.3	799.282	0.436833	0.230556	1.89469	0.0581329	0.4109	ENSG00000163497	FEV
10736	ENSG00000241258.7	796.299	-0.35605	0.187994	-1.89394	0.0582326	0.411176	ENSG00000241258	CRCP
6761	ENSG00000160404.18	1459.12	0.344005	0.181643	1.89386	0.0582442	0.411176	ENSG00000160404	TOR2A
5891	ENSG00000147403.17	13160.2	0.270408	0.142812	1.89346	0.0582965	0.411216	ENSG00000147403	RPL10
1353	ENSG00000090776.6	1209.32	0.428869	0.226523	1.89327	0.0583222	0.411216	ENSG00000090776	EFNB1
4832	ENSG00000136270.14	2839.61	0.340347	0.179854	1.89236	0.0584434	0.411744	ENSG00000136270	TBRG4
5008	ENSG00000137713.16	769.856	-0.398116	0.210403	-1.89216	0.0584692	0.411744	ENSG00000137713	PPP2R1B
2533	ENSG00000109062.12	18708.6	0.266476	0.140867	1.89168	0.0585334	0.411941	ENSG00000109062	SLC9A3R1
7831	ENSG00000168785.8	2208.48	-0.302005	0.159831	-1.88953	0.0588211	0.41371	ENSG00000168785	TSPAN5
6883	ENSG00000162076.13	801.696	0.374917	0.198474	1.88899	0.0588928	0.413958	ENSG00000162076	FLYWCH2
7599	ENSG00000167088.11	1464.1	0.327786	0.173573	1.88846	0.0589637	0.414201	ENSG00000167088	SNRPD1
289	ENSG00000022567.10	604.02	-0.388301	0.205782	-1.88696	0.0591662	0.415367	ENSG00000022567	SLC45A4
162	ENSG00000008988.10	7067.75	0.338601	0.179492	1.88644	0.0592351	0.415442	ENSG00000008988	RPS20
7177	ENSG00000164077.14	926.695	0.395757	0.209802	1.88633	0.0592498	0.415442	ENSG00000164077	MON1A
10619	ENSG00000232434.2	1722.4	0.401907	0.213182	1.88528	0.0593925	0.416056	ENSG00000232434	AJM1
888	ENSG00000073756.12	1499.43	-0.37876	0.200939	-1.88495	0.0594366	0.416056	ENSG00000073756	PTGS2
4256	ENSG00000130827.6	4373.18	0.303731	0.161141	1.88487	0.0594471	0.416056	ENSG00000130827	PLXNA3
346	ENSG00000033100.16	4697.88	0.325914	0.172959	1.88434	0.0595195	0.416308	ENSG00000033100	CHPF2
8543	ENSG00000175581.14	614.942	0.357231	0.189742	1.88272	0.0597385	0.417284	ENSG00000175581	MRPL48
10695	ENSG00000237945.7	314.699	0.433148	0.23008	1.8826	0.059755	0.417284	ENSG00000237945	LINC00649
2482	ENSG00000108528.14	2784.93	0.323416	0.171826	1.88223	0.0598053	0.417284	ENSG00000108528	SLC25A11
3862	ENSG00000125846.15	606.42	-0.355248	0.188738	-1.88222	0.0598057	0.417284	ENSG00000125846	ZNF133
8296	ENSG00000172943.20	1295.53	-0.3226	0.171632	-1.8796	0.0601624	0.419515	ENSG00000172943	PHF8
9610	ENSG00000188917.15	426.025	-0.388532	0.206881	-1.87805	0.0603746	0.420726	ENSG00000188917	TRMT2B
8890	ENSG00000179978.11	199.113	-0.506861	0.269924	-1.87779	0.0604099	0.420726	ENSG00000179978	NAIPP2
1387	ENSG00000091947.10	2001.29	0.351481	0.187249	1.87707	0.060508	0.421152	ENSG00000091947	TMEM101
2138	ENSG00000105063.19	12778.7	0.301938	0.160884	1.87675	0.0605525	0.421204	ENSG00000105063	PPP6R1
10395	ENSG00000214029.5	246.432	-0.513008	0.27339	-1.87647	0.0605909	0.421214	ENSG00000214029	ZNF891
8520	ENSG00000175309.15	517.801	-0.401496	0.214081	-1.87544	0.0607318	0.421936	ENSG00000175309	PHYKPL
8509	ENSG00000175213.3	747.484	0.369854	0.197263	1.87492	0.0608031	0.42201	ENSG00000175213	ZNF408
11381	ENSG00000287281.1	336.08	-0.415808	0.221791	-1.87477	0.0608241	0.42201	ENSG00000287281	AC012101.2
2922	ENSG00000113758.13	7900.76	0.287492	0.153365	1.87456	0.0608536	0.42201	ENSG00000113758	DBN1
850	ENSG00000072210.19	1606.43	-0.300898	0.16056	-1.87404	0.0609242	0.422029	ENSG00000072210	ALDH3A2
5511	ENSG00000143126.8	3069.68	0.31127	0.16613	1.87365	0.0609787	0.422029	ENSG00000143126	CELSR2
8730	ENSG00000177854.8	377.79	0.411546	0.219662	1.87354	0.0609937	0.422029	ENSG00000177854	TMEM187
1541	ENSG00000100036.13	402.078	0.396031	0.21143	1.87311	0.0610534	0.422029	ENSG00000100036	SLC35E4
7010	ENSG00000163161.14	1622.18	-0.327619	0.174911	-1.87306	0.0610601	0.422029	ENSG00000163161	ERCC3
7089	ENSG00000163682.17	4123.55	0.313845	0.167584	1.87276	0.0611018	0.422029	ENSG00000163682	RPL9
2709	ENSG00000111540.16	3121.66	-0.280894	0.149998	-1.87266	0.0611158	0.422029	ENSG00000111540	RAB5B
9762	ENSG00000196782.12	751.275	-0.346962	0.18531	-1.87233	0.0611611	0.422086	ENSG00000196782	MAML3
3859	ENSG00000125843.11	1207.99	0.349035	0.18645	1.87201	0.0612057	0.422138	ENSG00000125843	AP5S1
9517	ENSG00000187634.12	799.097	0.340597	0.181993	1.87148	0.0612785	0.422384	ENSG00000187634	SAMD11
9040	ENSG00000182240.16	348.635	0.441065	0.235728	1.87108	0.0613341	0.422416	ENSG00000182240	BACE2
8867	ENSG00000179632.10	3894.97	0.316209	0.169013	1.87091	0.0613573	0.422416	ENSG00000179632	MAF1
1531	ENSG00000099995.19	5721.14	0.292232	0.156379	1.86875	0.0616578	0.424228	ENSG00000099995	SF3A1
9824	ENSG00000197217.13	1581.57	-0.333635	0.178623	-1.86782	0.0617872	0.424775	ENSG00000197217	ENTPD4
242	ENSG00000013619.14	275.195	-0.447951	0.239848	-1.86764	0.0618119	0.424775	ENSG00000013619	MAMLD1
4713	ENSG00000135404.12	9590.16	0.284747	0.15257	1.86633	0.0619946	0.425774	ENSG00000135404	CD63
2179	ENSG00000105372.8	10079.3	0.269862	0.144657	1.86553	0.0621067	0.426286	ENSG00000105372	RPS19
8788	ENSG00000178685.14	802.149	0.492578	0.264081	1.86526	0.0621456	0.426297	ENSG00000178685	PARP10
9512	ENSG00000187607.16	321.199	-0.438922	0.235387	-1.86468	0.0622259	0.42659	ENSG00000187607	ZNF286A
10142	ENSG00000204084.13	400.297	-0.44631	0.239449	-1.86391	0.0623345	0.427078	ENSG00000204084	INPP5B
7816	ENSG00000168653.11	1557.84	0.317184	0.170319	1.8623	0.0625609	0.428371	ENSG00000168653	NDUFS5
5148	ENSG00000138771.16	1969.7	-0.336227	0.180673	-1.86097	0.0627485	0.429397	ENSG00000138771	SHROOM3
251	ENSG00000014914.21	224.095	-0.501837	0.269708	-1.86067	0.0627911	0.429431	ENSG00000014914	MTMR11
9198	ENSG00000183878.15	235.098	-0.475623	0.255827	-1.85916	0.0630047	0.430447	ENSG00000183878	UTY
3248	ENSG00000117318.9	1343.93	0.415358	0.223421	1.85908	0.0630152	0.430447	ENSG00000117318	ID3
8798	ENSG00000178802.18	1046.06	-0.313775	0.168818	-1.85865	0.0630765	0.430607	ENSG00000178802	MPI
1859	ENSG00000102119.11	1696.17	0.345794	0.186141	1.8577	0.0632111	0.431267	ENSG00000102119	EMD
11372	ENSG00000286190.2	4960.39	0.278842	0.150192	1.85657	0.0633724	0.432109	ENSG00000286190	AC055839.2
237	ENSG00000013523.11	2442.47	-0.283289	0.152628	-1.85608	0.0634428	0.43233	ENSG00000013523	ANGEL1
8374	ENSG00000173801.17	11808.3	0.295421	0.15926	1.85496	0.0636017	0.433153	ENSG00000173801	JUP
8387	ENSG00000173894.11	2088.6	0.300595	0.162174	1.85353	0.0638064	0.434083	ENSG00000173894	CBX2
2110	ENSG00000104866.11	2532.79	0.324207	0.174919	1.85347	0.0638144	0.434083	ENSG00000104866	PPP1R37
10153	ENSG00000204172.12	263.953	-0.477154	0.257633	-1.85207	0.0640158	0.435193	ENSG00000204172	AGAP9
7093	ENSG00000163694.15	1905.28	-0.311121	0.168028	-1.8516	0.0640832	0.435391	ENSG00000163694	RBM47
3382	ENSG00000119383.20	6811.65	0.323272	0.174616	1.85133	0.0641216	0.435392	ENSG00000119383	PTPA
1123	ENSG00000083168.11	1600.48	-0.302068	0.16321	-1.8508	0.0641988	0.435657	ENSG00000083168	KAT6A
6687	ENSG00000159596.7	615.152	-0.349229	0.188784	-1.84989	0.0643297	0.436229	ENSG00000159596	TMEM69
5090	ENSG00000138382.15	612.929	0.35271	0.190687	1.84968	0.0643597	0.436229	ENSG00000138382	METTL5
11192	ENSG00000273136.7	193.876	-0.506457	0.273875	-1.84923	0.0644246	0.43628	ENSG00000273136	NBPF26
1597	ENSG00000100299.18	2697.22	0.328742	0.177786	1.84909	0.0644452	0.43628	ENSG00000100299	ARSA
1817	ENSG00000101665.9	273.17	0.448808	0.242753	1.84883	0.0644822	0.43628	ENSG00000101665	SMAD7
4621	ENSG00000134590.14	2514.97	0.301502	0.16317	1.84779	0.0646333	0.437043	ENSG00000134590	RTL8C
4611	ENSG00000134452.20	798.91	-0.338728	0.183428	-1.84666	0.0647967	0.437295	ENSG00000134452	FBH1
1569	ENSG00000100201.22	9138.29	-0.280789	0.152053	-1.84665	0.0647975	0.437295	ENSG00000100201	DDX17
10489	ENSG00000221890.5	2417.63	0.284797	0.15423	1.84657	0.064809	0.437295	ENSG00000221890	NPTXR
9584	ENSG00000188603.21	3032.64	0.351985	0.190648	1.84626	0.0648544	0.437295	ENSG00000188603	CLN3
2224	ENSG00000105669.14	5869.99	0.295671	0.160151	1.8462	0.0648627	0.437295	ENSG00000105669	COPE
3405	ENSG00000119599.17	179.985	-0.511847	0.277486	-1.84459	0.0650978	0.438621	ENSG00000119599	DCAF4
686	ENSG00000066405.13	5956.55	-0.348874	0.189182	-1.84412	0.0651655	0.438684	ENSG00000066405	CLDN18
4242	ENSG00000130766.5	3697.81	0.288938	0.156692	1.84399	0.0651843	0.438684	ENSG00000130766	SESN2
6762	ENSG00000160408.14	1149.06	0.342021	0.185549	1.84329	0.0652867	0.4391	ENSG00000160408	ST6GALNAC6
9881	ENSG00000197728.11	5253.53	0.269032	0.145977	1.84298	0.0653321	0.4391	ENSG00000197728	RPS26
3148	ENSG00000116205.14	573.026	-0.357497	0.193999	-1.84278	0.0653617	0.4391	ENSG00000116205	TCEANC2
8708	ENSG00000177614.11	1310.73	-0.30581	0.165996	-1.84227	0.0654359	0.439339	ENSG00000177614	PGBD5
6250	ENSG00000153006.16	918.67	0.339251	0.18425	1.84125	0.065585	0.44008	ENSG00000153006	SREK1IP1
8941	ENSG00000180901.11	1157.91	-0.309466	0.168199	-1.83988	0.0657853	0.440959	ENSG00000180901	KCTD2
3995	ENSG00000127774.7	998.217	0.324596	0.176427	1.83983	0.0657933	0.440959	ENSG00000127774	EMC6
2664	ENSG00000110906.13	1061	-0.315966	0.171788	-1.83928	0.0658746	0.441243	ENSG00000110906	KCTD10
4206	ENSG00000130559.19	1881.86	-0.338448	0.184082	-1.83858	0.0659777	0.441444	ENSG00000130559	CAMSAP1
1282	ENSG00000088881.21	1238.66	0.382752	0.208182	1.83855	0.0659821	0.441444	ENSG00000088881	EBF4
11359	ENSG00000285437.1	2185.54	-0.315416	0.171742	-1.83657	0.0662734	0.443062	ENSG00000285437	POLR2J3
3786	ENSG00000125149.12	630.997	-0.34452	0.18762	-1.83627	0.0663184	0.443062	ENSG00000125149	C16orf70
6893	ENSG00000162227.8	1415.08	0.353204	0.192365	1.83612	0.0663406	0.443062	ENSG00000162227	TAF6L
1506	ENSG00000099814.16	4016.76	0.337709	0.18396	1.83578	0.0663908	0.443137	ENSG00000099814	CEP170B
5117	ENSG00000138614.15	963.818	-0.342935	0.186875	-1.8351	0.0664904	0.443318	ENSG00000138614	INTS14
2281	ENSG00000106236.4	5078.32	-0.348944	0.190153	-1.83507	0.0664957	0.443318	ENSG00000106236	NPTX2
4898	ENSG00000136830.12	2789.61	0.330763	0.180287	1.83464	0.066559	0.443367	ENSG00000136830	NIBAN2
472	ENSG00000050426.16	1354.47	-0.303935	0.165678	-1.83449	0.066581	0.443367	ENSG00000050426	LETMD1
7819	ENSG00000168710.18	2902.43	-0.302637	0.165062	-1.83348	0.0667312	0.443971	ENSG00000168710	AHCYL1
5184	ENSG00000139266.6	3174.14	0.3097	0.168949	1.8331	0.0667877	0.443971	ENSG00000139266	MARCHF9
1084	ENSG00000081177.18	920.695	-0.34931	0.190558	-1.83309	0.0667886	0.443971	ENSG00000081177	EXD2
7850	ENSG00000168906.13	4176.42	-0.287212	0.156709	-1.83277	0.0668367	0.444031	ENSG00000168906	MAT2A
3188	ENSG00000116670.15	1484.13	0.307455	0.16779	1.83238	0.0668944	0.444136	ENSG00000116670	MAD2L2
3546	ENSG00000121417.14	264.916	-0.444732	0.242739	-1.83214	0.0669305	0.444136	ENSG00000121417	ZNF211
4600	ENSG00000134324.12	10976.6	-0.264376	0.144413	-1.8307	0.0671454	0.445238	ENSG00000134324	LPIN1
1515	ENSG00000099899.15	2794.78	0.322277	0.176059	1.8305	0.0671747	0.445238	ENSG00000099899	TRMT2A
6029	ENSG00000149294.16	2238.08	-0.289932	0.158519	-1.82901	0.0673976	0.445839	ENSG00000149294	NCAM1
4104	ENSG00000129244.9	478.14	0.420175	0.229748	1.82885	0.0674223	0.445839	ENSG00000129244	ATP1B2
8704	ENSG00000177600.9	11590.4	0.284472	0.155559	1.82871	0.0674426	0.445839	ENSG00000177600	RPLP2
4415	ENSG00000132549.18	673.279	-0.340191	0.186052	-1.82847	0.0674788	0.445839	ENSG00000132549	VPS13B
7553	ENSG00000166783.22	1301.46	-0.353592	0.193432	-1.82799	0.0675507	0.445839	ENSG00000166783	MARF1
6198	ENSG00000152223.15	877.257	-0.367286	0.200991	-1.82738	0.0676426	0.445839	ENSG00000152223	EPG5
7350	ENSG00000165282.14	2686.45	0.278255	0.152274	1.82733	0.0676506	0.445839	ENSG00000165282	PIGO
3100	ENSG00000115816.15	984.681	0.328252	0.179643	1.82724	0.0676632	0.445839	ENSG00000115816	CEBPZ
11117	ENSG00000268362.6	361.359	-0.412909	0.226003	-1.82701	0.067699	0.445839	ENSG00000268362	AC092279.1
11250	ENSG00000276550.4	1811.2	-0.314947	0.172388	-1.82696	0.0677052	0.445839	ENSG00000276550	HERC2P2
7961	ENSG00000169871.13	2465.62	0.413891	0.226565	1.82681	0.0677289	0.445839	ENSG00000169871	TRIM56
2181	ENSG00000105379.10	641.153	0.393589	0.215457	1.82676	0.0677353	0.445839	ENSG00000105379	ETFB
9304	ENSG00000185043.12	792.043	0.348936	0.191084	1.82608	0.0678377	0.446034	ENSG00000185043	CIB1
8649	ENSG00000176986.16	5358.14	-0.281093	0.15395	-1.82588	0.0678689	0.446034	ENSG00000176986	SEC24C
9548	ENSG00000188176.12	367.456	0.444932	0.243694	1.82579	0.0678824	0.446034	ENSG00000188176	SMTNL2
8497	ENSG00000175115.13	2705.38	0.321584	0.176299	1.82408	0.0681393	0.447464	ENSG00000175115	PACS1
9021	ENSG00000182108.11	1362.48	0.3341	0.183203	1.82366	0.0682036	0.447467	ENSG00000182108	DEXI
2255	ENSG00000105875.14	285.396	-0.48183	0.264225	-1.82356	0.0682183	0.447467	ENSG00000105875	WDR91
2616	ENSG00000110108.10	4331.36	0.33019	0.181162	1.82262	0.0683609	0.448144	ENSG00000110108	TMEM109
8914	ENSG00000180376.17	326.377	-0.412696	0.226551	-1.82164	0.0685091	0.448351	ENSG00000180376	CCDC66
2453	ENSG00000108262.16	6612.91	0.275735	0.151391	1.82134	0.0685553	0.448351	ENSG00000108262	GIT1
7423	ENSG00000165819.12	789.332	-0.330411	0.181424	-1.82121	0.0685746	0.448351	ENSG00000165819	METTL3
10597	ENSG00000230453.9	247.886	0.46107	0.253175	1.82116	0.0685831	0.448351	ENSG00000230453	ANKRD18B
8133	ENSG00000171303.7	1992.88	0.308607	0.16946	1.82112	0.0685894	0.448351	ENSG00000171303	KCNK3
2514	ENSG00000108828.16	9591.5	0.303177	0.166599	1.8198	0.0687888	0.449397	ENSG00000108828	VAT1
1589	ENSG00000100266.19	1409.96	-0.307075	0.168776	-1.81942	0.0688467	0.44943	ENSG00000100266	PACSIN2
9919	ENSG00000197978.9	351.668	-0.407614	0.224059	-1.81922	0.0688776	0.44943	ENSG00000197978	GOLGA6L9
5193	ENSG00000139364.10	2936.83	-0.293395	0.161295	-1.81899	0.0689124	0.44943	ENSG00000139364	TMEM132B
10107	ENSG00000198925.12	6375.96	0.314117	0.172743	1.81841	0.0690015	0.449754	ENSG00000198925	ATG9A
3796	ENSG00000125356.7	470.696	0.380858	0.209522	1.81774	0.0691032	0.450159	ENSG00000125356	NDUFA1
1821	ENSG00000101751.10	375.142	-0.424969	0.233988	-1.8162	0.0693401	0.451444	ENSG00000101751	POLI
2187	ENSG00000105409.19	1939.72	0.310498	0.171015	1.81562	0.0694285	0.451586	ENSG00000105409	ATP1A3
1626	ENSG00000100399.16	167.653	0.554536	0.305439	1.81554	0.0694412	0.451586	ENSG00000100399	CHADL
8059	ENSG00000170638.9	1395.64	0.319766	0.176169	1.81511	0.0695073	0.451758	ENSG00000170638	TRABD
9364	ENSG00000185559.16	1031.65	0.326152	0.179739	1.81459	0.0695875	0.452021	ENSG00000185559	DLK1
1732	ENSG00000101057.16	2799.02	0.315293	0.173867	1.81341	0.0697685	0.452783	ENSG00000101057	MYBL2
7590	ENSG00000166987.15	5395.99	0.322805	0.17802	1.81331	0.0697844	0.452783	ENSG00000166987	MBD6
8258	ENSG00000172531.15	6898.92	0.279313	0.154117	1.81235	0.0699326	0.453487	ENSG00000172531	PPP1CA
9083	ENSG00000182774.13	7480.57	0.289091	0.159619	1.81114	0.0701198	0.454178	ENSG00000182774	RPS17
5383	ENSG00000141499.17	1278.72	0.334462	0.184697	1.81087	0.0701617	0.454178	ENSG00000141499	WRAP53
6745	ENSG00000160282.14	169.143	0.533112	0.294417	1.81074	0.0701809	0.454178	ENSG00000160282	FTCD
1296	ENSG00000089060.11	535.15	0.371696	0.205286	1.81063	0.0701987	0.454178	ENSG00000089060	SLC8B1
9758	ENSG00000196756.13	692.974	0.355319	0.196418	1.80899	0.0704519	0.455227	ENSG00000196756	SNHG17
1585	ENSG00000100243.21	6665.95	0.283506	0.156725	1.80895	0.0704594	0.455227	ENSG00000100243	CYB5R3
2838	ENSG00000112699.11	465.96	0.363827	0.201142	1.80881	0.0704809	0.455227	ENSG00000112699	GMDS
6605	ENSG00000158470.5	3220.44	-0.287717	0.159096	-1.80845	0.0705365	0.455329	ENSG00000158470	B4GALT5
8689	ENSG00000177425.11	682.078	0.367907	0.203525	1.80768	0.0706569	0.455847	ENSG00000177425	PAWR
7913	ENSG00000169418.10	350.829	0.431564	0.23879	1.8073	0.0707157	0.455968	ENSG00000169418	NPR1
5200	ENSG00000139436.21	739.216	-0.341169	0.188852	-1.80654	0.0708341	0.456295	ENSG00000139436	GIT2
7890	ENSG00000169213.7	7910.76	-0.263506	0.145869	-1.80646	0.0708465	0.456295	ENSG00000169213	RAB3B
2172	ENSG00000105325.14	2525.27	0.317444	0.17579	1.80582	0.0709466	0.456681	ENSG00000105325	FZR1
1281	ENSG00000088876.13	406.077	-0.380039	0.210499	-1.80542	0.0710088	0.456824	ENSG00000088876	ZNF343
5131	ENSG00000138674.17	3188.59	-0.272799	0.151178	-1.80449	0.0711547	0.457255	ENSG00000138674	SEC31A
4308	ENSG00000131408.15	789.056	0.346721	0.192145	1.80448	0.0711562	0.457255	ENSG00000131408	NR1H2
11241	ENSG00000275964.1	314.213	0.446068	0.24726	1.80405	0.0712239	0.457374	ENSG00000275964	AL355001.2
8381	ENSG00000173846.13	279.362	0.434114	0.24066	1.80385	0.071255	0.457374	ENSG00000173846	PLK3
1422	ENSG00000093100.13	241.582	0.519873	0.28857	1.80155	0.0716162	0.459433	ENSG00000093100	AC016026.1
3180	ENSG00000116584.20	665.058	-0.335777	0.186447	-1.80092	0.0717147	0.45956	ENSG00000116584	ARHGEF2
9562	ENSG00000188315.8	198.41	-0.516635	0.286911	-1.80068	0.0717539	0.45956	ENSG00000188315	C3orf62
4739	ENSG00000135587.9	751.987	0.382668	0.212516	1.80066	0.071757	0.45956	ENSG00000135587	SMPD2
7273	ENSG00000164713.10	4115.22	0.304634	0.169211	1.80032	0.0718098	0.459639	ENSG00000164713	BRI3
63	ENSG00000005206.17	3411.14	0.294469	0.163715	1.79867	0.0720709	0.460963	ENSG00000005206	SPPL2B
9858	ENSG00000197530.12	2405.51	0.340365	0.189259	1.79841	0.0721124	0.460963	ENSG00000197530	MIB2
10763	ENSG00000242265.5	8272.1	0.40257	0.223868	1.79824	0.0721383	0.460963	ENSG00000242265	PEG10
10289	ENSG00000205795.4	234.482	0.450867	0.250792	1.79777	0.0722135	0.460963	ENSG00000205795	CYS1
10460	ENSG00000215845.11	1213.65	0.326276	0.181493	1.79773	0.072219	0.460963	ENSG00000215845	TSTD1
4581	ENSG00000134243.12	4281.6	-0.281984	0.156921	-1.79698	0.0723391	0.461031	ENSG00000134243	SORT1
9325	ENSG00000185220.12	214.35	-0.464158	0.258349	-1.79663	0.0723939	0.461031	ENSG00000185220	PGBD2
96	ENSG00000006432.15	1793.59	-0.317741	0.176857	-1.79659	0.0724002	0.461031	ENSG00000006432	MAP3K9
1967	ENSG00000103245.14	1489.03	0.326272	0.181659	1.79607	0.0724832	0.461031	ENSG00000103245	CIAO3
598	ENSG00000063169.11	1092.64	0.420737	0.234256	1.79606	0.0724851	0.461031	ENSG00000063169	BICRA
10446	ENSG00000215252.11	1570.7	-0.306996	0.170929	-1.79604	0.072488	0.461031	ENSG00000215252	GOLGA8B
994	ENSG00000077463.15	1178.5	0.366232	0.203938	1.7958	0.0725262	0.461031	ENSG00000077463	SIRT6
6878	ENSG00000162065.14	3208.86	0.280461	0.156246	1.795	0.0726533	0.461031	ENSG00000162065	TBC1D24
2370	ENSG00000107249.23	1933.91	-0.326407	0.181848	-1.79494	0.0726627	0.461031	ENSG00000107249	GLIS3
7538	ENSG00000166589.13	3579.2	0.30169	0.1681	1.79471	0.0727003	0.461031	ENSG00000166589	CDH16
10477	ENSG00000219481.10	1887.28	-0.283457	0.157946	-1.79464	0.0727107	0.461031	ENSG00000219481	NBPF1
6999	ENSG00000163082.10	767.229	-0.339013	0.188906	-1.79461	0.0727155	0.461031	ENSG00000163082	SGPP2
4278	ENSG00000131067.17	3476.83	0.300641	0.167627	1.79352	0.0728905	0.461408	ENSG00000131067	GGT7
1513	ENSG00000099875.14	2309.51	0.286823	0.159928	1.79345	0.0729007	0.461408	ENSG00000099875	MKNK2
4160	ENSG00000130175.9	19286.7	0.278213	0.155132	1.79339	0.0729101	0.461408	ENSG00000130175	PRKCSH
5564	ENSG00000143442.22	2641.21	-0.277562	0.154784	-1.79322	0.0729371	0.461408	ENSG00000143442	POGZ
6372	ENSG00000155034.19	900.82	0.381204	0.212632	1.79279	0.0730072	0.461595	ENSG00000155034	FBXL18
8676	ENSG00000177225.17	2832.93	0.342939	0.191338	1.79232	0.0730823	0.461813	ENSG00000177225	GATD1
6034	ENSG00000149328.15	1887.64	0.285577	0.159451	1.791	0.0732939	0.462894	ENSG00000149328	GLB1L2
7665	ENSG00000167566.17	1716.1	0.365028	0.203854	1.79063	0.0733523	0.463006	ENSG00000167566	NCKAP5L
2599	ENSG00000110002.16	899.464	-0.32158	0.179837	-1.78817	0.0737484	0.464473	ENSG00000110002	VWA5A
8061	ENSG00000170667.15	10699.5	0.289101	0.161683	1.78807	0.0737649	0.464473	ENSG00000170667	RASA4B
1094	ENSG00000081791.9	1385.73	-0.305535	0.170893	-1.78787	0.073797	0.464473	ENSG00000081791	DELE1
5240	ENSG00000139910.20	519.942	0.372722	0.208519	1.78747	0.0738609	0.464473	ENSG00000139910	NOVA1
9705	ENSG00000196453.8	811.219	0.342879	0.191854	1.78719	0.0739075	0.464473	ENSG00000196453	ZNF777
10030	ENSG00000198720.13	2554.32	0.317723	0.177782	1.78715	0.073914	0.464473	ENSG00000198720	ANKRD13B
11246	ENSG00000276234.5	594.712	-0.345473	0.193333	-1.78694	0.0739476	0.464473	ENSG00000276234	TADA2A
1681	ENSG00000100664.11	4080.28	0.337615	0.188936	1.78693	0.0739494	0.464473	ENSG00000100664	EIF5
4218	ENSG00000130684.14	615.752	-0.360437	0.20173	-1.78673	0.073981	0.464473	ENSG00000130684	ZNF337
5344	ENSG00000141013.17	1245.64	-0.296364	0.165876	-1.78666	0.0739926	0.464473	ENSG00000141013	GAS8
6328	ENSG00000154319.16	4070.23	-0.272862	0.152754	-1.78628	0.0740542	0.464603	ENSG00000154319	FAM167A
8916	ENSG00000180398.13	2042.26	-0.281278	0.157508	-1.78581	0.0741305	0.464826	ENSG00000180398	MCFD2
2691	ENSG00000111271.15	1041.5	-0.316815	0.17748	-1.78508	0.0742488	0.465311	ENSG00000111271	ACAD10
8524	ENSG00000175334.8	3586.23	0.270426	0.151521	1.78474	0.074304	0.465401	ENSG00000175334	BANF1
9495	ENSG00000187239.17	595.131	-0.38205	0.21411	-1.78436	0.0743653	0.465446	ENSG00000187239	FNBP1
5011	ENSG00000137726.17	7237.21	0.260085	0.145776	1.78414	0.0744013	0.465446	ENSG00000137726	FXYD6
9359	ENSG00000185513.17	648.588	-0.346658	0.194322	-1.78394	0.0744338	0.465446	ENSG00000185513	L3MBTL1
9905	ENSG00000197905.9	189.278	0.506458	0.283946	1.78364	0.0744817	0.46549	ENSG00000197905	TEAD4
8637	ENSG00000176871.9	1726.28	-0.308301	0.173	-1.78209	0.0747351	0.466383	ENSG00000176871	WSB2
8701	ENSG00000177570.14	235.123	-0.507514	0.284796	-1.78203	0.0747445	0.466383	ENSG00000177570	SAMD12
9891	ENSG00000197785.14	3203.12	0.309025	0.173445	1.78169	0.0747995	0.466383	ENSG00000197785	ATAD3A
10654	ENSG00000235092.6	247.877	-0.549076	0.308219	-1.78144	0.0748398	0.466383	ENSG00000235092	ID2-AS1
7719	ENSG00000167964.13	2574.14	0.310423	0.174267	1.78131	0.0748619	0.466383	ENSG00000167964	RAB26
9753	ENSG00000196712.18	1800.95	-0.281088	0.157803	-1.78126	0.0748702	0.466383	ENSG00000196712	NF1
8554	ENSG00000175727.14	3155.36	0.304708	0.171172	1.78013	0.0750554	0.46728	ENSG00000175727	MLXIP
4557	ENSG00000134013.16	2047.36	-0.39567	0.222346	-1.77952	0.0751542	0.46764	ENSG00000134013	LOXL2
7866	ENSG00000169032.10	1511.12	-0.290613	0.163475	-1.77773	0.0754484	0.469214	ENSG00000169032	MAP2K1
1384	ENSG00000091704.10	756.868	0.342173	0.192519	1.77735	0.0755111	0.469347	ENSG00000091704	CPA1
7999	ENSG00000170144.20	9529.53	0.278631	0.156813	1.77683	0.0755963	0.469621	ENSG00000170144	HNRNPA3
1741	ENSG00000101138.12	1149.11	-0.306852	0.172794	-1.77582	0.0757619	0.470393	ENSG00000101138	CSTF1
7240	ENSG00000164403.14	1994.58	0.313114	0.176352	1.77551	0.0758136	0.470458	ENSG00000164403	SHROOM1
3592	ENSG00000122359.18	1014.87	0.35937	0.202472	1.77491	0.0759122	0.470813	ENSG00000122359	ANXA11
9080	ENSG00000182749.6	930.94	0.379568	0.213999	1.77369	0.0761141	0.471563	ENSG00000182749	PAQR7
4880	ENSG00000136731.13	2011.11	-0.299657	0.16902	-1.77291	0.0762439	0.471563	ENSG00000136731	UGGT1
1551	ENSG00000100092.24	1037.36	0.319244	0.180109	1.77251	0.0763106	0.471563	ENSG00000100092	SH3BP1
1919	ENSG00000102910.14	1816.56	-0.308324	0.173969	-1.77229	0.0763463	0.471563	ENSG00000102910	LONP2
8885	ENSG00000179943.8	1437.19	0.333547	0.188207	1.77223	0.0763562	0.471563	ENSG00000179943	FIZ1
10820	ENSG00000245849.8	168.275	-0.498074	0.281047	-1.77221	0.0763603	0.471563	ENSG00000245849	RAD51-AS1
9815	ENSG00000197136.4	4966.88	0.364172	0.205492	1.7722	0.076362	0.471563	ENSG00000197136	PCNX3
247	ENSG00000014164.7	1507.95	0.310294	0.175106	1.77203	0.0763899	0.471563	ENSG00000014164	ZC3H3
3244	ENSG00000117280.13	1307.59	-0.29724	0.167749	-1.77193	0.0764059	0.471563	ENSG00000117280	RAB29
2480	ENSG00000108518.8	13075.7	0.280524	0.158371	1.77131	0.0765086	0.471941	ENSG00000108518	PFN1
2459	ENSG00000108349.17	3898.41	-0.270611	0.15281	-1.7709	0.0765773	0.472109	ENSG00000108349	CASC3
10188	ENSG00000204392.11	1169.17	0.311949	0.176241	1.77002	0.0767245	0.472591	ENSG00000204392	LSM2
1966	ENSG00000103227.19	427.891	0.417975	0.236153	1.76993	0.0767384	0.472591	ENSG00000103227	LMF1
5304	ENSG00000140563.15	533.226	-0.436309	0.246605	-1.76926	0.0768508	0.472921	ENSG00000140563	MCTP2
6119	ENSG00000151148.14	1483.4	-0.289826	0.163825	-1.76911	0.0768751	0.472921	ENSG00000151148	UBE3B
6715	ENSG00000160072.20	2023.2	0.338884	0.191591	1.76879	0.0769287	0.472994	ENSG00000160072	ATAD3B
4190	ENSG00000130402.12	9354.23	-0.268002	0.151538	-1.76854	0.07697	0.472994	ENSG00000130402	ACTN4
5552	ENSG00000143379.12	1654.27	-0.282537	0.159794	-1.76814	0.0770381	0.473157	ENSG00000143379	SETDB1
7253	ENSG00000164574.16	755.761	-0.342004	0.193536	-1.76713	0.0772057	0.473825	ENSG00000164574	GALNT10
8290	ENSG00000172893.16	27622.1	0.281385	0.159259	1.76684	0.0772549	0.473825	ENSG00000172893	DHCR7
11259	ENSG00000277150.2	989.747	0.339755	0.192308	1.76672	0.0772753	0.473825	ENSG00000277150	F8A3
104	ENSG00000006607.14	1935.21	-0.300347	0.170025	-1.76649	0.0773134	0.473825	ENSG00000006607	FARP2
8248	ENSG00000172432.19	1479.13	-0.302487	0.171356	-1.76525	0.0775211	0.474234	ENSG00000172432	GTPBP2
10632	ENSG00000233297.4	433.123	0.380148	0.21543	1.7646	0.0776304	0.474234	ENSG00000233297	RASA4DP
8464	ENSG00000174791.11	253.158	0.478512	0.271181	1.76455	0.0776402	0.474234	ENSG00000174791	RIN1
10895	ENSG00000253686.2	271.967	-0.428622	0.242951	-1.76423	0.0776926	0.474234	ENSG00000253686	LINC01484
8349	ENSG00000173540.13	3194.34	0.302124	0.171255	1.76418	0.0777014	0.474234	ENSG00000173540	GMPPB
831	ENSG00000071553.17	21310.4	0.288624	0.163612	1.76407	0.07772	0.474234	ENSG00000071553	ATP6AP1
5282	ENSG00000140400.17	1781.6	0.289467	0.164092	1.76405	0.077724	0.474234	ENSG00000140400	MAN2C1
7655	ENSG00000167524.16	201.721	-0.538201	0.305151	-1.76372	0.0777792	0.474234	ENSG00000167524	RSKR
4202	ENSG00000130529.16	287.215	0.43006	0.24384	1.7637	0.077783	0.474234	ENSG00000130529	TRPM4
8499	ENSG00000175137.11	1940.96	0.310637	0.176136	1.76362	0.0777965	0.474234	ENSG00000175137	SH3BP5L
7398	ENSG00000165669.14	196.783	0.47812	0.271201	1.76298	0.0779045	0.474638	ENSG00000165669	FAM204A
8015	ENSG00000170296.10	8523.25	0.262665	0.149063	1.76211	0.0780501	0.474904	ENSG00000170296	GABARAP
7792	ENSG00000168434.13	443.337	-0.393209	0.223152	-1.76207	0.078058	0.474904	ENSG00000168434	COG7
10992	ENSG00000259529.2	230.314	-0.465352	0.264124	-1.76187	0.0780913	0.474904	ENSG00000259529	AL136295.5
8727	ENSG00000177830.18	3623.32	0.29036	0.164815	1.76173	0.078115	0.474904	ENSG00000177830	CHID1
6333	ENSG00000154370.16	1249.43	0.360284	0.204668	1.76034	0.0783507	0.476083	ENSG00000154370	TRIM11
7581	ENSG00000166925.9	2087.37	0.309716	0.17604	1.75935	0.0785186	0.476116	ENSG00000166925	TSC22D4
1778	ENSG00000101350.8	4053.04	-0.259272	0.147385	-1.75914	0.0785533	0.476116	ENSG00000101350	KIF3B
7512	ENSG00000166441.13	9380.29	0.259043	0.147287	1.75876	0.0786177	0.476116	ENSG00000166441	RPL27A
1677	ENSG00000100632.11	1429.61	0.307872	0.175053	1.75874	0.0786219	0.476116	ENSG00000100632	ERH
9549	ENSG00000188177.14	309.862	0.407781	0.231869	1.75867	0.0786332	0.476116	ENSG00000188177	ZC3H6
6784	ENSG00000160712.13	1584.32	-0.338047	0.192261	-1.75827	0.0787018	0.476116	ENSG00000160712	IL6R
2054	ENSG00000104332.12	1277.85	-0.312416	0.177689	-1.75822	0.0787107	0.476116	ENSG00000104332	SFRP1
9801	ENSG00000197056.11	196.031	-0.464072	0.263947	-1.7582	0.078713	0.476116	ENSG00000197056	ZMYM1
5273	ENSG00000140365.16	2728.67	0.328303	0.186739	1.75809	0.0787324	0.476116	ENSG00000140365	COMMD4
9616	ENSG00000188997.8	407.529	-0.373634	0.212926	-1.75476	0.0793006	0.478336	ENSG00000188997	KCTD21
7126	ENSG00000163877.11	342.551	-0.42599	0.242764	-1.75475	0.0793015	0.478336	ENSG00000163877	SNIP1
9676	ENSG00000196295.12	310.838	-0.40862	0.232894	-1.75453	0.0793398	0.478336	ENSG00000196295	GARS1-DT
4791	ENSG00000135956.9	1728.5	-0.279782	0.159465	-1.75451	0.0793433	0.478336	ENSG00000135956	TMEM127
8259	ENSG00000172534.14	8853.62	0.319008	0.181846	1.75428	0.0793833	0.478336	ENSG00000172534	HCFC1
19	ENSG00000002822.15	562.681	0.476139	0.271419	1.75426	0.0793856	0.478336	ENSG00000002822	MAD1L1
5966	ENSG00000148358.19	2619.2	-0.292759	0.166889	-1.75422	0.0793937	0.478336	ENSG00000148358	GPR107
5672	ENSG00000144468.17	425.915	-0.391237	0.223141	-1.75332	0.0795468	0.479006	ENSG00000144468	RHBDD1
2238	ENSG00000105738.11	4645.54	-0.271285	0.154755	-1.753	0.0796023	0.479086	ENSG00000105738	SIPA1L3
3702	ENSG00000124006.15	6564.53	0.297728	0.16988	1.75258	0.079675	0.47927	ENSG00000124006	OBSL1
2209	ENSG00000105583.11	2605.29	0.29495	0.168586	1.74956	0.0801944	0.481937	ENSG00000105583	WDR83OS
2164	ENSG00000105270.15	3460.94	0.32362	0.185018	1.74913	0.080269	0.481937	ENSG00000105270	CLIP3
2207	ENSG00000105568.18	10390	0.266842	0.152562	1.74908	0.0802772	0.481937	ENSG00000105568	PPP2R1A
1787	ENSG00000101413.12	1548.74	-0.279267	0.15967	-1.74902	0.0802875	0.481937	ENSG00000101413	RPRD1B
110	ENSG00000006704.10	861.887	0.345524	0.197603	1.74857	0.080365	0.48211	ENSG00000006704	GTF2IRD1
10221	ENSG00000204681.11	728.164	-0.330344	0.188947	-1.74834	0.0804049	0.48211	ENSG00000204681	GABBR1
9531	ENSG00000187840.5	3647.82	0.29121	0.166585	1.74812	0.0804434	0.48211	ENSG00000187840	EIF4EBP1
3756	ENSG00000124587.14	1378.15	0.303178	0.173475	1.74767	0.080521	0.482321	ENSG00000124587	PEX6
4822	ENSG00000136193.17	4307.32	-0.317166	0.181559	-1.7469	0.080655	0.482669	ENSG00000136193	SCRN1
8766	ENSG00000178234.13	1327.54	-0.292123	0.167229	-1.74685	0.0806638	0.482669	ENSG00000178234	GALNT11
10892	ENSG00000253352.9	4489.42	-0.264748	0.151607	-1.74628	0.080762	0.482947	ENSG00000253352	TUG1
4118	ENSG00000129472.15	447.971	-0.365148	0.209128	-1.74605	0.0808019	0.482947	ENSG00000129472	RAB2B
622	ENSG00000064490.14	1425.87	0.35545	0.203598	1.74585	0.0808375	0.482947	ENSG00000064490	RFXANK
6590	ENSG00000158246.8	1429.41	0.346278	0.198511	1.74438	0.0810936	0.484182	ENSG00000158246	TENT5B
11361	ENSG00000285628.1	566.319	0.428638	0.245754	1.74417	0.0811292	0.484182	ENSG00000285628	AC126755.6
2535	ENSG00000109066.14	3094.17	0.310139	0.177853	1.7438	0.0811941	0.484315	ENSG00000109066	TMEM104
7747	ENSG00000168078.10	604.581	0.362772	0.208085	1.74338	0.081267	0.484496	ENSG00000168078	PBK
2933	ENSG00000113971.20	252.18	-0.4612	0.26471	-1.74228	0.0814594	0.485389	ENSG00000113971	NPHP3
8514	ENSG00000175224.16	2600.59	-0.266735	0.153164	-1.7415	0.0815957	0.485947	ENSG00000175224	ATG13
923	ENSG00000075218.19	951.469	-0.317949	0.182638	-1.74087	0.0817066	0.486353	ENSG00000075218	GTSE1
10510	ENSG00000223745.8	232.792	-0.450373	0.258803	-1.74021	0.081822	0.486658	ENSG00000223745	CCDC18-AS1
7717	ENSG00000167930.17	7470.33	0.259411	0.149084	1.74003	0.0818546	0.486658	ENSG00000167930	FAM234A
5351	ENSG00000141076.18	1194.29	-0.290916	0.167224	-1.73968	0.0819161	0.486658	ENSG00000141076	UTP4
10620	ENSG00000232442.1	546.606	0.351837	0.202322	1.739	0.082035	0.486658	ENSG00000232442	MHENCR
3222	ENSG00000116984.14	641.378	-0.332809	0.191384	-1.73896	0.0820425	0.486658	ENSG00000116984	MTR
4680	ENSG00000135100.18	3246.18	0.269253	0.154842	1.73889	0.0820542	0.486658	ENSG00000135100	HNF1A
113	ENSG00000006740.17	539.528	-0.348172	0.200229	-1.73887	0.082057	0.486658	ENSG00000006740	ARHGAP44
6749	ENSG00000160294.11	2502.65	-0.314542	0.180985	-1.73794	0.0822211	0.487377	ENSG00000160294	MCM3AP
4233	ENSG00000130733.11	3373.31	0.317542	0.182814	1.73696	0.0823936	0.488146	ENSG00000130733	YIPF2
10032	ENSG00000198722.14	4804.58	-0.289281	0.166701	-1.73532	0.0826834	0.489337	ENSG00000198722	UNC13B
8588	ENSG00000176155.19	734.732	0.372516	0.214678	1.73523	0.0826997	0.489337	ENSG00000176155	CCDC57
5352	ENSG00000141084.11	914.885	-0.325644	0.187718	-1.73475	0.0827846	0.489337	ENSG00000141084	RANBP10
1473	ENSG00000097021.19	1628.56	0.306596	0.17676	1.73454	0.082823	0.489337	ENSG00000097021	ACOT7
7451	ENSG00000166086.13	1147.36	-0.295211	0.170203	-1.73446	0.0828363	0.489337	ENSG00000166086	JAM3
360	ENSG00000035403.18	2495.4	-0.291835	0.168297	-1.73405	0.0829098	0.489337	ENSG00000035403	VCL
1124	ENSG00000083223.18	281.686	-0.444981	0.256672	-1.73365	0.08298	0.489337	ENSG00000083223	TUT7
9319	ENSG00000185163.10	1195.09	0.341145	0.196792	1.73353	0.0830018	0.489337	ENSG00000185163	DDX51
7834	ENSG00000168802.14	3680.81	0.279457	0.161215	1.73344	0.083017	0.489337	ENSG00000168802	CHTF8
6521	ENSG00000157259.8	1607.12	-0.274762	0.15851	-1.7334	0.0830244	0.489337	ENSG00000157259	GATAD1
5621	ENSG00000143850.16	4967.31	-0.251082	0.144923	-1.73252	0.0831811	0.490007	ENSG00000143850	PLEKHA6
5756	ENSG00000145425.10	12352.8	0.302374	0.174704	1.73079	0.0834899	0.491572	ENSG00000145425	RPS3A
2456	ENSG00000108309.14	4708.46	0.271491	0.156938	1.72992	0.0836442	0.491593	ENSG00000108309	RUNDC3A
10583	ENSG00000228696.10	436.635	-0.38431	0.222178	-1.72974	0.0836766	0.491593	ENSG00000228696	ARL17B
2212	ENSG00000105613.10	1261.44	0.339322	0.196183	1.72962	0.0836985	0.491593	ENSG00000105613	MAST1
10087	ENSG00000198886.2	352463	0.267689	0.154789	1.72938	0.0837414	0.491593	ENSG00000198886	MT-ND4
4679	ENSG00000135097.7	2906.37	0.301095	0.174108	1.72936	0.0837448	0.491593	ENSG00000135097	MSI1
9302	ENSG00000185024.17	1768.12	0.303205	0.175333	1.72932	0.0837526	0.491593	ENSG00000185024	BRF1
10479	ENSG00000220323.4	292.346	-0.44935	0.259955	-1.72857	0.0838866	0.49175	ENSG00000220323	H2BC19P
11075	ENSG00000265018.6	399.568	-0.392313	0.226965	-1.72852	0.0838958	0.49175	ENSG00000265018	AGAP12P
1776	ENSG00000101346.14	3547.86	-0.274138	0.158604	-1.72844	0.0839088	0.49175	ENSG00000101346	POFUT1
8503	ENSG00000175182.15	829.112	0.346657	0.2006	1.7281	0.08397	0.491855	ENSG00000175182	FAM131A
4454	ENSG00000132824.14	2827.93	-0.281424	0.162905	-1.72754	0.0840715	0.492049	ENSG00000132824	SERINC3
10465	ENSG00000215915.10	767.552	0.315108	0.182414	1.72744	0.0840895	0.492049	ENSG00000215915	ATAD3C
6255	ENSG00000153048.11	4639.41	0.253193	0.146599	1.72711	0.0841476	0.492136	ENSG00000153048	CARHSP1
2364	ENSG00000107140.16	4348.55	0.284459	0.164801	1.72608	0.0843337	0.492788	ENSG00000107140	TESK1
8945	ENSG00000180921.7	3722.24	0.349976	0.202806	1.72567	0.0844073	0.492788	ENSG00000180921	FAM83H
1055	ENSG00000079974.17	587.044	-0.339432	0.19671	-1.72555	0.0844289	0.492788	ENSG00000079974	RABL2B
9588	ENSG00000188636.4	4373.47	-0.254167	0.147333	-1.72512	0.0845057	0.492788	ENSG00000188636	RTL6
7781	ENSG00000168301.13	225.292	0.576725	0.334348	1.72492	0.084541	0.492788	ENSG00000168301	KCTD6
525	ENSG00000055732.13	1585.89	-0.29313	0.169948	-1.72483	0.0845589	0.492788	ENSG00000055732	MCOLN3
8857	ENSG00000179454.14	202.147	0.471811	0.273544	1.72481	0.0845621	0.492788	ENSG00000179454	KLHL28
3813	ENSG00000125503.13	3182.59	0.325067	0.188537	1.72416	0.0846798	0.493137	ENSG00000125503	PPP1R12C
1040	ENSG00000079385.22	1048.16	-0.345358	0.200324	-1.724	0.0847084	0.493137	ENSG00000079385	CEACAM1
5416	ENSG00000141696.13	1874.03	0.270408	0.156893	1.72351	0.0847955	0.493391	ENSG00000141696	P3H4
5056	ENSG00000138073.14	4558.03	0.280108	0.162579	1.72291	0.0849052	0.493443	ENSG00000138073	PREB
6860	ENSG00000161847.14	5933.55	0.303168	0.175978	1.72276	0.0849315	0.493443	ENSG00000161847	RAVER1
3956	ENSG00000126903.16	522.499	0.363304	0.210886	1.72275	0.0849344	0.493443	ENSG00000126903	SLC10A3
1764	ENSG00000101246.20	2090.9	0.334854	0.194481	1.72178	0.0851088	0.494204	ENSG00000101246	ARFRP1
6949	ENSG00000162714.12	645.371	0.378095	0.219729	1.72074	0.0852984	0.494985	ENSG00000162714	ZNF496
8483	ENSG00000174989.13	980.217	-0.29901	0.173884	-1.7196	0.0855052	0.494985	ENSG00000174989	FBXW8
7212	ENSG00000164219.10	462.578	0.478914	0.278514	1.71953	0.0855177	0.494985	ENSG00000164219	PGGT1B
7876	ENSG00000169116.11	2919.06	-0.276761	0.160984	-1.71919	0.0855807	0.494985	ENSG00000169116	PARM1
6628	ENSG00000158796.17	1221.95	-0.288026	0.167549	-1.71906	0.0856032	0.494985	ENSG00000158796	DEDD
652	ENSG00000065457.10	526.18	-0.383839	0.223292	-1.719	0.0856135	0.494985	ENSG00000065457	ADAT1
93	ENSG00000006283.18	275.02	0.407252	0.236933	1.71885	0.0856414	0.494985	ENSG00000006283	CACNA1G
4223	ENSG00000130706.13	4869.54	0.282592	0.164428	1.71864	0.08568	0.494985	ENSG00000130706	ADRM1
4188	ENSG00000130382.9	4982.12	0.280129	0.163009	1.71849	0.0857075	0.494985	ENSG00000130382	MLLT1
8337	ENSG00000173442.13	2319.86	0.352178	0.204936	1.71848	0.0857092	0.494985	ENSG00000173442	EHBP1L1
8549	ENSG00000175634.15	2539.06	0.295167	0.171767	1.71841	0.0857215	0.494985	ENSG00000175634	RPS6KB2
8912	ENSG00000180357.9	1950.76	-0.286697	0.166898	-1.7178	0.0858332	0.495363	ENSG00000180357	ZNF609
2667	ENSG00000110921.14	11575.5	0.273119	0.159014	1.71758	0.085874	0.495363	ENSG00000110921	MVK
1945	ENSG00000103089.9	781.652	0.306293	0.178416	1.71674	0.086027	0.495483	ENSG00000103089	FA2H
9263	ENSG00000184640.19	10997.1	0.246738	0.143755	1.71637	0.0860936	0.495483	ENSG00000184640	SEPTIN9
4165	ENSG00000130222.11	1061.6	0.327434	0.190773	1.71636	0.086097	0.495483	ENSG00000130222	GADD45G
8048	ENSG00000170584.11	747.684	0.336649	0.196142	1.71635	0.086098	0.495483	ENSG00000170584	NUDCD2
6746	ENSG00000160284.15	1396.51	0.302127	0.176037	1.71627	0.0861123	0.495483	ENSG00000160284	SPATC1L
4712	ENSG00000135392.17	961.093	-0.299063	0.174279	-1.716	0.0861621	0.495519	ENSG00000135392	DNAJC14
2388	ENSG00000107551.21	920.044	-0.329824	0.192319	-1.71498	0.0863492	0.496142	ENSG00000107551	RASSF4
7703	ENSG00000167792.13	4198.71	0.278354	0.162312	1.71493	0.0863576	0.496142	ENSG00000167792	NDUFV1
9605	ENSG00000188833.10	278.741	0.421203	0.245708	1.71424	0.0864848	0.496622	ENSG00000188833	ENTPD8
10122	ENSG00000203485.14	699.309	0.368821	0.215181	1.714	0.0865284	0.496622	ENSG00000203485	INF2
1943	ENSG00000103066.13	1728.69	0.338111	0.197348	1.71327	0.0866622	0.497122	ENSG00000103066	PLA2G15
3181	ENSG00000116586.12	1050.66	0.290466	0.16956	1.71305	0.0867028	0.497122	ENSG00000116586	LAMTOR2
3357	ENSG00000118946.12	393.481	0.448019	0.261627	1.71243	0.0868174	0.497529	ENSG00000118946	PCDH17
6826	ENSG00000161133.16	219.534	-0.455966	0.266411	-1.71151	0.0869863	0.498047	ENSG00000161133	USP41
1465	ENSG00000096433.11	8119.28	-0.243946	0.142536	-1.71147	0.0869953	0.498047	ENSG00000096433	ITPR3
10194	ENSG00000204435.14	3595.7	0.276563	0.161654	1.71084	0.0871113	0.49846	ENSG00000204435	CSNK2B
1737	ENSG00000101104.13	1953.25	-0.321396	0.187928	-1.71021	0.0872276	0.498875	ENSG00000101104	PABPC1L
10541	ENSG00000225630.1	478.999	0.361652	0.21156	1.70945	0.0873668	0.499421	ENSG00000225630	MTND2P28
8828	ENSG00000179104.9	583.911	-0.325215	0.190412	-1.70796	0.0876439	0.500753	ENSG00000179104	TMTC2
628	ENSG00000064687.13	1968.23	0.379839	0.222443	1.70758	0.0877145	0.500905	ENSG00000064687	ABCA7
6562	ENSG00000157873.17	646.106	0.376636	0.220598	1.70734	0.0877592	0.500909	ENSG00000157873	TNFRSF14
6387	ENSG00000155256.17	2037.75	0.320407	0.187699	1.70703	0.0878169	0.500987	ENSG00000155256	ZFYVE27
2149	ENSG00000105185.12	1457.58	0.28357	0.166179	1.70641	0.0879314	0.501376	ENSG00000105185	PDCD5
8922	ENSG00000180543.5	1564.81	-0.273605	0.160361	-1.70619	0.0879731	0.501376	ENSG00000180543	TSPYL5
9601	ENSG00000188803.15	261.014	-0.434891	0.254961	-1.70572	0.0880605	0.501624	ENSG00000188803	SHISA6
[truncated: 9,388 more rows]

## Sheet: padj0.1
	Gene.stable.ID.version	baseMean	log2FoldChange	lfcSE	stat	pvalue	padj	Gene.stable.ID	Gene.name
10280	ENSG00000205670.12	445.084	2.00138	0.628596	3.18389	0.00145312	0.0427932	ENSG00000205670	SMIM11A
10729	ENSG00000240801.1	1416.15	1.59605	0.253907	6.28597	3.26e-10	1.01e-06	ENSG00000240801	AC132217.1
5491	ENSG00000142798.20	457.097	1.36518	0.216576	6.30345	2.91e-10	1.01e-06	ENSG00000142798	HSPG2
10067	ENSG00000198835.4	382.503	1.31776	0.243754	5.40611	6.44e-08	4.6e-05	ENSG00000198835	GJC2
10231	ENSG00000204922.5	676.233	1.27965	0.203999	6.27284	3.55e-10	1.01e-06	ENSG00000204922	UQCC3
11101	ENSG00000267303.1	455.294	1.26456	0.262759	4.81263	1.49e-06	0.000584878	ENSG00000267303	AC011511.4
7976	ENSG00000169962.5	735.21	1.19602	0.211001	5.66833	1.44e-08	1.49e-05	ENSG00000169962	TAS1R3
1497	ENSG00000099769.6	676.618	1.19036	0.221474	5.3747	7.67e-08	4.6e-05	ENSG00000099769	IGFALS
10636	ENSG00000233913.7	175.219	1.17503	0.282816	4.15477	3.26e-05	0.00407453	ENSG00000233913	RPL10P9
783	ENSG00000070031.4	941.923	1.15819	0.253547	4.56796	4.92e-06	0.00143797	ENSG00000070031	SCT
11151	ENSG00000270885.2	231.432	1.11602	0.257749	4.32988	1.49e-05	0.0027177	ENSG00000270885	RASL10B
4257	ENSG00000130829.18	1250.59	1.08791	0.185128	5.87651	4.19e-09	6.01e-06	ENSG00000130829	DUSP9
8164	ENSG00000171551.12	380.184	1.08092	0.275921	3.91752	8.95e-05	0.00742985	ENSG00000171551	ECEL1
8667	ENSG00000177133.11	189.261	1.07551	0.311115	3.45697	0.000546285	0.0227909	ENSG00000177133	PRDM16-DT
9476	ENSG00000186998.16	3573.2	1.0705	0.197723	5.41415	6.16e-08	4.6e-05	ENSG00000186998	EMID1
5035	ENSG00000137880.6	2687.78	1.05386	0.173026	6.09077	1.12e-09	2.56e-06	ENSG00000137880	GCHFR
11336	ENSG00000283782.2	377.243	1.04845	0.255233	4.10781	3.99e-05	0.00435717	ENSG00000283782	AC116366.2
7941	ENSG00000169692.13	8474	1.02503	0.173702	5.9011	3.61e-09	6.01e-06	ENSG00000169692	AGPAT2
10565	ENSG00000227097.5	949.793	1.01799	0.214906	4.73688	2.17e-06	0.000772285	ENSG00000227097	RPS28P7
10819	ENSG00000245848.3	1084.23	1.00545	0.183119	5.49069	4e-08	3.51e-05	ENSG00000245848	CEBPA
10262	ENSG00000205363.5	221.269	1.00074	0.34285	2.91889	0.00351284	0.0737702	ENSG00000205363	INSYN1
10851	ENSG00000248859.2	338.304	0.981946	0.231638	4.23914	2.24e-05	0.00334587	ENSG00000248859	LINC01574
1137	ENSG00000083807.10	364.405	0.976654	0.226011	4.32127	1.55e-05	0.0027177	ENSG00000083807	SLC27A5
4221	ENSG00000130702.15	2099.13	0.975436	0.173296	5.62872	1.82e-08	1.72e-05	ENSG00000130702	LAMA5
94	ENSG00000006327.14	258.303	0.974073	0.24753	3.93518	8.31e-05	0.00722649	ENSG00000006327	TNFRSF12A
4384	ENSG00000132329.11	1975.54	0.961724	0.221536	4.34117	1.42e-05	0.00268972	ENSG00000132329	RAMP1
6725	ENSG00000160180.15	603.578	0.940898	0.208874	4.50462	6.65e-06	0.00168257	ENSG00000160180	TFF3
11355	ENSG00000285304.1	195.584	0.936376	0.284424	3.29218	0.000994141	0.0334539	ENSG00000285304	Z83844.2
5390	ENSG00000141526.17	864.033	0.930424	0.184172	5.05192	4.37e-07	0.000226394	ENSG00000141526	SLC16A3
5389	ENSG00000141524.16	202.284	0.924077	0.327593	2.82081	0.00479028	0.0884327	ENSG00000141524	TMC6
11334	ENSG00000283293.1	246.705	0.922601	0.302908	3.04581	0.00232052	0.0574431	ENSG00000283293	RN7SK
4292	ENSG00000131187.10	156.942	0.921051	0.346465	2.65842	0.00785079	0.123531	ENSG00000131187	F12
4148	ENSG00000130005.13	2179.23	0.919406	0.158231	5.81054	6.23e-09	7.88e-06	ENSG00000130005	GAMT
11200	ENSG00000273420.1	383.613	0.919322	0.241661	3.80418	0.000142277	0.00992399	ENSG00000273420	AC008738.7
2444	ENSG00000108106.14	11046.8	0.918952	0.199184	4.61359	3.96e-06	0.00121801	ENSG00000108106	UBE2S
9002	ENSG00000181873.13	319.182	0.912659	0.289516	3.15236	0.00161956	0.045544	ENSG00000181873	IBA57
5027	ENSG00000137825.11	159.456	0.912361	0.319074	2.8594	0.00424442	0.0819174	ENSG00000137825	ITPKA
3519	ENSG00000120913.23	170.081	0.912132	0.320442	2.84648	0.00442057	0.083895	ENSG00000120913	PDLIM2
2656	ENSG00000110811.20	361.26	0.907406	0.321694	2.82071	0.00479169	0.0884327	ENSG00000110811	P3H3
7340	ENSG00000165238.16	209.809	0.907097	0.286442	3.16678	0.00154139	0.0446611	ENSG00000165238	WNK2
8360	ENSG00000173621.9	1107.92	0.899321	0.200974	4.47481	7.65e-06	0.00180053	ENSG00000173621	LRFN4
1361	ENSG00000090971.5	2866.31	0.891483	0.165402	5.38981	7.05e-08	4.6e-05	ENSG00000090971	NAT14
4506	ENSG00000133315.12	666.005	0.890838	0.21049	4.23221	2.31e-05	0.00334587	ENSG00000133315	MACROD1
9459	ENSG00000186654.21	608.101	0.88806	0.209868	4.23151	2.32e-05	0.00334587	ENSG00000186654	PRR5
4236	ENSG00000130748.7	1762.18	0.88294	0.206	4.28612	1.82e-05	0.0030447	ENSG00000130748	TMEM160
10780	ENSG00000243449.6	1650.73	0.879471	0.194724	4.51651	6.29e-06	0.00162696	ENSG00000243449	C4orf48
11097	ENSG00000267059.2	720.818	0.878127	0.212039	4.14134	3.45e-05	0.00418267	ENSG00000267059	AC005943.1
9940	ENSG00000198113.3	894.906	0.870386	0.181446	4.79694	1.61e-06	0.000611498	ENSG00000198113	TOR4A
9086	ENSG00000182809.11	4393.81	0.868317	0.179555	4.83595	1.33e-06	0.000538897	ENSG00000182809	CRIP2
2679	ENSG00000111186.13	179.592	0.866623	0.313319	2.76594	0.00567582	0.0993592	ENSG00000111186	WNT5B
9521	ENSG00000187714.7	5252.56	0.863852	0.147035	5.87513	4.23e-09	6.01e-06	ENSG00000187714	SLC18A3
83	ENSG00000006015.17	1163.16	0.863364	0.18435	4.68329	2.82e-06	0.000929215	ENSG00000006015	REX1BD
6213	ENSG00000152413.15	264.996	0.862915	0.26001	3.31878	0.000904109	0.03158	ENSG00000152413	HOMER1
4841	ENSG00000136367.14	817.788	0.859419	0.227507	3.77755	0.000158376	0.0104523	ENSG00000136367	ZFHX2
3570	ENSG00000121900.19	3898.12	0.854608	0.149563	5.71403	1.1e-08	1.26e-05	ENSG00000121900	TMEM54
9498	ENSG00000187244.12	5544.04	0.850665	0.172305	4.93698	7.93e-07	0.000347482	ENSG00000187244	BCAM
9361	ENSG00000185519.9	725.077	0.849333	0.187837	4.52165	6.14e-06	0.00162496	ENSG00000185519	FAM131C
3782	ENSG00000125089.17	736.912	0.84894	0.217776	3.89823	9.69e-05	0.00766223	ENSG00000125089	SH3TC1
6626	ENSG00000158792.16	2092.45	0.848451	0.172623	4.91504	8.88e-07	0.000374356	ENSG00000158792	SPATA2L
10177	ENSG00000204347.4	2264.17	0.848377	0.166603	5.0922	3.54e-07	0.000201509	ENSG00000204347	BTBD17
8662	ENSG00000177103.15	272.042	0.847945	0.271229	3.12631	0.00177013	0.0479915	ENSG00000177103	DSCAML1
10556	ENSG00000226416.1	323.939	0.847392	0.24126	3.51236	0.000444149	0.0198627	ENSG00000226416	MRPL23-AS1
9093	ENSG00000182871.16	727.947	0.846893	0.22795	3.71526	0.000202995	0.011915	ENSG00000182871	COL18A1
10003	ENSG00000198569.10	405.321	0.845688	0.221237	3.82254	0.000132086	0.00958	ENSG00000198569	SLC34A3
5971	ENSG00000148400.12	170.638	0.845242	0.312564	2.70422	0.00684642	0.113892	ENSG00000148400	NOTCH1
15	ENSG00000002330.14	3230.5	0.83908	0.187028	4.48637	7.24e-06	0.00175519	ENSG00000002330	BAD
5484	ENSG00000142694.6	1788.77	0.838325	0.185287	4.52446	6.06e-06	0.00162496	ENSG00000142694	EVA1B
9193	ENSG00000183828.15	1907.19	0.834988	0.19991	4.17682	2.96e-05	0.00376861	ENSG00000183828	NUDT14
1932	ENSG00000103024.7	2153.53	0.833933	0.187849	4.43938	9.02e-06	0.00193832	ENSG00000103024	NME3
8546	ENSG00000175602.4	1303.1	0.833741	0.213697	3.9015	9.56e-05	0.00766223	ENSG00000175602	CCDC85B
7051	ENSG00000163499.12	10010.1	0.830861	0.176361	4.71113	2.46e-06	0.000850061	ENSG00000163499	CRYBA2
3888	ENSG00000125995.16	2749.41	0.829032	0.188958	4.38738	1.15e-05	0.00233277	ENSG00000125995	ROMO1
1558	ENSG00000100116.17	848.646	0.828106	0.191618	4.32165	1.55e-05	0.0027177	ENSG00000100116	GCAT
882	ENSG00000073536.18	804.343	0.825455	0.182405	4.5254	6.03e-06	0.00162496	ENSG00000073536	NLE1
8854	ENSG00000179403.12	9968.02	0.82243	0.152939	5.3775	7.55e-08	4.6e-05	ENSG00000179403	VWA1
8028	ENSG00000170412.18	6859.59	0.818803	0.151606	5.40088	6.63e-08	4.6e-05	ENSG00000170412	GPRC5C
8093	ENSG00000170955.10	489.439	0.81597	0.215356	3.78894	0.000151293	0.0101701	ENSG00000170955	CAVIN3
7618	ENSG00000167244.21	89141	0.8143	0.162049	5.02502	5.03e-07	0.000238833	ENSG00000167244	IGF2
5577	ENSG00000143537.14	1943.1	0.814155	0.197821	4.11562	3.86e-05	0.00433308	ENSG00000143537	ADAM15
11111	ENSG00000267795.6	1258.93	0.809982	0.187239	4.32594	1.52e-05	0.0027177	ENSG00000267795	SMIM22
11231	ENSG00000275074.2	389.669	0.809688	0.225217	3.59515	0.000324204	0.0159126	ENSG00000275074	NUDT18
2401	ENSG00000107736.21	318.122	0.808575	0.306154	2.64107	0.00826445	0.128212	ENSG00000107736	CDH23
6874	ENSG00000162009.8	493.82	0.808048	0.206356	3.91579	9.01e-05	0.00742985	ENSG00000162009	SSTR5
4310	ENSG00000131435.13	286.551	0.804889	0.237311	3.39171	0.000694589	0.0263643	ENSG00000131435	PDLIM4
8187	ENSG00000171813.14	206.338	0.802233	0.272848	2.94022	0.00327984	0.0698085	ENSG00000171813	PWWP2B
5959	ENSG00000148334.15	3548.9	0.800758	0.161316	4.9639	6.91e-07	0.00031469	ENSG00000148334	PTGES2
10138	ENSG00000204052.4	366.395	0.798419	0.218493	3.65421	0.000257973	0.0134134	ENSG00000204052	LRRC73
10961	ENSG00000257529.5	271.553	0.797921	0.262733	3.03701	0.0023894	0.0582064	ENSG00000257529	RPL36A-HNRNPH2
1512	ENSG00000099864.18	1854.56	0.797757	0.17856	4.46771	7.91e-06	0.00180053	ENSG00000099864	PALM
9479	ENSG00000187045.19	6546.87	0.795852	0.192315	4.13827	3.5e-05	0.00419436	ENSG00000187045	TMPRSS6
6670	ENSG00000159335.18	16972.7	0.795157	0.191746	4.14694	3.37e-05	0.0041322	ENSG00000159335	PTMS
9478	ENSG00000187024.15	386.435	0.794723	0.234501	3.38899	0.00070151	0.0263763	ENSG00000187024	PTRH1
7432	ENSG00000165912.16	1021.32	0.793302	0.214961	3.69045	0.000223858	0.0124954	ENSG00000165912	PACSIN3
5468	ENSG00000142544.7	559.37	0.791532	0.252252	3.13787	0.00170182	0.0469217	ENSG00000142544	CTU1
10554	ENSG00000226287.8	333.701	0.787697	0.25925	3.03837	0.00237863	0.0582064	ENSG00000226287	TMEM191A
8801	ENSG00000178896.9	1185.88	0.785849	0.216285	3.6334	0.000279716	0.0142831	ENSG00000178896	EXOSC4
4162	ENSG00000130193.8	3640.14	0.784901	0.175545	4.47122	7.78e-06	0.00180053	ENSG00000130193	THEM6
8717	ENSG00000177697.19	6378.26	0.783415	0.187595	4.1761	2.97e-05	0.00376861	ENSG00000177697	CD151
1761	ENSG00000101220.18	1839.71	0.782748	0.202725	3.86113	0.000112866	0.0086838	ENSG00000101220	C20orf27
9126	ENSG00000183186.8	1129.42	0.780163	0.186155	4.19094	2.78e-05	0.0036783	ENSG00000183186	C2CD4C
10635	ENSG00000233493.4	1059.79	0.779173	0.200658	3.88309	0.000103135	0.00804385	ENSG00000233493	TMEM238
8292	ENSG00000172922.11	3628.46	0.778867	0.154475	5.04201	4.61e-07	0.000228067	ENSG00000172922	RNASEH2C
10109	ENSG00000198931.11	3071.68	0.778742	0.174707	4.45743	8.29e-06	0.00183781	ENSG00000198931	APRT
9205	ENSG00000183971.9	344.738	0.778709	0.295005	2.63965	0.00829915	0.128575	ENSG00000183971	NPW
7948	ENSG00000169738.8	4573.01	0.778446	0.189809	4.1012	4.11e-05	0.00437405	ENSG00000169738	DCXR
8575	ENSG00000176020.9	570.434	0.778361	0.264249	2.94556	0.00322373	0.0692615	ENSG00000176020	AMIGO3
7560	ENSG00000166823.5	687.674	0.778172	0.192837	4.03538	5.45e-05	0.00530561	ENSG00000166823	MESP1
9684	ENSG00000196358.11	725.434	0.775663	0.195605	3.96545	7.33e-05	0.00664936	ENSG00000196358	NTNG2
6755	ENSG00000160325.14	10937.9	0.775589	0.172573	4.49426	6.98e-06	0.00172815	ENSG00000160325	CACFD1
4036	ENSG00000128311.14	1091.81	0.774577	0.20542	3.7707	0.00016279	0.01053	ENSG00000128311	TST
11338	ENSG00000284194.3	773.735	0.773627	0.192918	4.01014	6.07e-05	0.00575825	ENSG00000284194	SCO2
9617	ENSG00000189043.10	306.53	0.772723	0.229725	3.36368	0.000769103	0.0279801	ENSG00000189043	NDUFA4
10333	ENSG00000213221.5	388.364	0.770407	0.234404	3.28666	0.00101382	0.0339506	ENSG00000213221	DNLZ
8288	ENSG00000172889.16	6243.26	0.768322	0.173708	4.42306	9.73e-06	0.00205199	ENSG00000172889	EGFL7
5023	ENSG00000137818.12	28257.3	0.767763	0.169798	4.52164	6.14e-06	0.00162496	ENSG00000137818	RPLP1
1500	ENSG00000099795.7	4492.16	0.766934	0.185879	4.12599	3.69e-05	0.00428918	ENSG00000099795	NDUFB7
7608	ENSG00000167136.7	1134.46	0.765061	0.182051	4.20246	2.64e-05	0.0035792	ENSG00000167136	ENDOG
2833	ENSG00000112667.13	1610.24	0.764024	0.194799	3.92211	8.78e-05	0.00742483	ENSG00000112667	DNPH1
2111	ENSG00000104870.13	12389.4	0.76274	0.185337	4.11542	3.86e-05	0.00433308	ENSG00000104870	FCGRT
4139	ENSG00000129911.9	1613.87	0.762318	0.181838	4.19228	2.76e-05	0.0036783	ENSG00000129911	KLF16
3314	ENSG00000118160.14	737.441	0.762082	0.259153	2.94067	0.00327506	0.0698085	ENSG00000118160	SLC8A2
4024	ENSG00000128185.10	3847.37	0.761947	0.17517	4.34977	1.36e-05	0.00265088	ENSG00000128185	DGCR6L
10398	ENSG00000214063.11	942.554	0.759792	0.200041	3.79818	0.000145765	0.0100575	ENSG00000214063	TSPAN4
10270	ENSG00000205544.4	720.522	0.758437	0.200115	3.79001	0.000150641	0.0101701	ENSG00000205544	TMEM256
7288	ENSG00000164880.16	4870.84	0.756928	0.213834	3.53979	0.000400447	0.0182395	ENSG00000164880	INTS1
10355	ENSG00000213563.7	2769.26	0.755505	0.18367	4.11339	3.9e-05	0.00433308	ENSG00000213563	C8orf82
7464	ENSG00000166166.13	1097.9	0.754793	0.210242	3.59012	0.000330525	0.0159855	ENSG00000166166	TRMT61A
5431	ENSG00000141933.9	1290.93	0.754234	0.20283	3.71856	0.000200365	0.0118831	ENSG00000141933	TPGS1
1567	ENSG00000100162.15	1459.84	0.754222	0.180648	4.1751	2.98e-05	0.00376861	ENSG00000100162	CENPM
8646	ENSG00000176973.8	3515.35	0.753643	0.176537	4.26903	1.96e-05	0.00319368	ENSG00000176973	FAM89B
8673	ENSG00000177191.2	1008.61	0.752252	0.170246	4.41861	9.93e-06	0.00205668	ENSG00000177191	B3GNT8
1509	ENSG00000099822.3	1408.85	0.75002	0.174157	4.30658	1.66e-05	0.00281776	ENSG00000099822	HCN2
5922	ENSG00000147804.10	741.505	0.748209	0.199868	3.74351	0.000181464	0.0112914	ENSG00000147804	SLC39A4
1910	ENSG00000102879.16	509.674	0.747434	0.229902	3.2511	0.00114957	0.0365648	ENSG00000102879	CORO1A
9294	ENSG00000184990.13	3317.84	0.747312	0.177128	4.21905	2.45e-05	0.00340758	ENSG00000184990	SIVA1
10513	ENSG00000223802.7	1558.1	0.746046	0.178138	4.18803	2.81e-05	0.00368287	ENSG00000223802	CERS1
7688	ENSG00000167700.9	2469.76	0.745646	0.185904	4.01092	6.05e-05	0.00575825	ENSG00000167700	MFSD3
8326	ENSG00000173272.16	3774.64	0.744674	0.162667	4.5779	4.7e-06	0.00140738	ENSG00000173272	MZT2A
9102	ENSG00000182938.7	317.008	0.743905	0.245046	3.03577	0.0023992	0.0582064	ENSG00000182938	OTOP3
1523	ENSG00000099953.10	251.477	0.740573	0.261888	2.82782	0.00468661	0.0870436	ENSG00000099953	MMP11
8241	ENSG00000172366.20	1815.2	0.740281	0.180484	4.10165	4.1e-05	0.00437405	ENSG00000172366	MCRIP2
1927	ENSG00000102981.9	1465.98	0.740029	0.194912	3.79673	0.000146618	0.0100575	ENSG00000102981	PARD6A
9788	ENSG00000196976.7	2050.36	0.738916	0.17969	4.11218	3.92e-05	0.00433308	ENSG00000196976	LAGE3
9339	ENSG00000185347.18	824.751	0.738516	0.218248	3.38383	0.000714811	0.0265999	ENSG00000185347	TEDC1
10630	ENSG00000233276.6	5873.22	0.738117	0.179486	4.11239	3.92e-05	0.00433308	ENSG00000233276	GPX1
1503	ENSG00000099804.9	3129.31	0.737029	0.169508	4.34805	1.37e-05	0.00265088	ENSG00000099804	CDC34
2402	ENSG00000107742.13	323.029	0.736863	0.246377	2.99079	0.00278258	0.0640106	ENSG00000107742	SPOCK2
9724	ENSG00000196544.8	984.723	0.735912	0.205926	3.57367	0.000352014	0.0167156	ENSG00000196544	BORCS6
8083	ENSG00000170889.14	21445.7	0.735177	0.170001	4.32454	1.53e-05	0.0027177	ENSG00000170889	RPS9
6594	ENSG00000158292.7	5437.66	0.734731	0.157859	4.65436	3.25e-06	0.00102796	ENSG00000158292	GPR153
638	ENSG00000065054.14	474.918	0.734695	0.20412	3.59934	0.00031903	0.0157948	ENSG00000065054	SLC9A3R2
6828	ENSG00000161179.14	1472.77	0.734605	0.191973	3.8266	0.000129925	0.00954491	ENSG00000161179	YDJC
7751	ENSG00000168101.14	1684.64	0.734592	0.177805	4.13146	3.6e-05	0.0042479	ENSG00000168101	NUDT16L1
3516	ENSG00000120896.13	1300.35	0.734318	0.190265	3.85945	0.000113644	0.00868498	ENSG00000120896	SORBS3
9179	ENSG00000183734.4	3831.83	0.733364	0.154721	4.73991	2.14e-06	0.000772285	ENSG00000183734	ASCL2
3185	ENSG00000116661.11	281.69	0.733315	0.254427	2.88222	0.00394878	0.0783359	ENSG00000116661	FBXO2
7472	ENSG00000166189.8	1534.42	0.733237	0.186423	3.9332	8.38e-05	0.00723106	ENSG00000166189	HPS6
8954	ENSG00000181029.9	2987.71	0.732491	0.172585	4.24424	2.19e-05	0.00334587	ENSG00000181029	TRAPPC5
1511	ENSG00000099849.15	1902.58	0.731958	0.206325	3.54759	0.000388766	0.0178503	ENSG00000099849	RASSF7
7940	ENSG00000169689.15	1836.66	0.731783	0.171385	4.26982	1.96e-05	0.00319368	ENSG00000169689	CENPX
5012	ENSG00000137731.14	1309.96	0.731265	0.172016	4.25113	2.13e-05	0.00334587	ENSG00000137731	FXYD2
3603	ENSG00000122490.19	3310.29	0.730698	0.179018	4.0817	4.47e-05	0.00458633	ENSG00000122490	SLC66A2
1971	ENSG00000103254.10	1906.31	0.730594	0.211728	3.45063	0.00055929	0.0228266	ENSG00000103254	ANTKMT
1453	ENSG00000095906.17	5107	0.730023	0.178628	4.08684	4.37e-05	0.00458633	ENSG00000095906	NUBP2
10234	ENSG00000204950.4	1191.71	0.729934	0.179132	4.07484	4.6e-05	0.00468143	ENSG00000204950	LRRC10B
8186	ENSG00000171798.18	691.636	0.728828	0.21182	3.44078	0.000580034	0.0233387	ENSG00000171798	KNDC1
8918	ENSG00000180448.10	464.066	0.727394	0.237222	3.06629	0.0021673	0.0550871	ENSG00000180448	ARHGAP45
9110	ENSG00000183010.17	5670.75	0.726691	0.155246	4.68091	2.86e-06	0.000929215	ENSG00000183010	PYCR1
3408	ENSG00000119632.4	661.334	0.726578	0.230304	3.15487	0.00160571	0.0454435	ENSG00000119632	IFI27L2
9477	ENSG00000187017.17	1225.27	0.725565	0.197536	3.67308	0.000239644	0.0129944	ENSG00000187017	ESPN
6315	ENSG00000154146.13	1215.62	0.725149	0.20354	3.56269	0.00036707	0.0172009	ENSG00000154146	NRGN
9047	ENSG00000182327.8	539.746	0.724086	0.229126	3.16021	0.00157654	0.0452703	ENSG00000182327	GLTPD2
10945	ENSG00000256514.1	313.007	0.723815	0.239777	3.0187	0.00253865	0.0598502	ENSG00000256514	AP003419.1
8552	ENSG00000175701.10	489.631	0.723476	0.241744	2.99273	0.00276491	0.0638438	ENSG00000175701	MTLN
2266	ENSG00000106003.13	845.773	0.723207	0.19488	3.71103	0.000206416	0.0119921	ENSG00000106003	LFNG
1045	ENSG00000079462.7	5874.39	0.723195	0.192383	3.75915	0.000170494	0.0107261	ENSG00000079462	PAFAH1B3
10139	ENSG00000204060.7	991.72	0.721318	0.171495	4.20607	2.6e-05	0.00356501	ENSG00000204060	FOXO6
3043	ENSG00000115286.20	2988.46	0.72051	0.179246	4.01967	5.83e-05	0.00562395	ENSG00000115286	NDUFS7
2228	ENSG00000105696.9	670.601	0.719236	0.227646	3.15945	0.00158065	0.0452703	ENSG00000105696	TMEM59L
7950	ENSG00000169750.9	1889.34	0.719185	0.184672	3.89439	9.84e-05	0.00773106	ENSG00000169750	RAC3
9212	ENSG00000184058.14	787.348	0.718611	0.183271	3.92104	8.82e-05	0.00742483	ENSG00000184058	TBX1
5271	ENSG00000140332.17	1008.59	0.718145	0.221676	3.23962	0.00119689	0.0373398	ENSG00000140332	TLE3
9234	ENSG00000184281.15	2641.02	0.71636	0.195971	3.65545	0.000256735	0.0134103	ENSG00000184281	TSSC4
2117	ENSG00000104886.12	2562.15	0.716061	0.193897	3.693	0.000221625	0.0124318	ENSG00000104886	PLEKHJ1
8473	ENSG00000174886.14	6251.15	0.715367	0.17922	3.99157	6.56e-05	0.0061264	ENSG00000174886	NDUFA11
2195	ENSG00000105472.13	319.709	0.715178	0.245202	2.91669	0.00353769	0.0737795	ENSG00000105472	CLEC11A
3407	ENSG00000119630.14	1518.34	0.71508	0.190189	3.75984	0.000170022	0.0107261	ENSG00000119630	PGF
3232	ENSG00000117122.14	657.382	0.714496	0.1871	3.8188	0.000134102	0.00966471	ENSG00000117122	MFAP2
6070	ENSG00000149823.9	5817.75	0.714465	0.169235	4.22173	2.42e-05	0.00340758	ENSG00000149823	VPS51
6853	ENSG00000161682.15	4371.09	0.714151	0.180663	3.95294	7.72e-05	0.00681417	ENSG00000161682	FAM171A2
5430	ENSG00000141905.19	880.375	0.713888	0.237081	3.01116	0.00260253	0.0612294	ENSG00000141905	NFIC
7851	ENSG00000168913.7	3425.78	0.71267	0.167228	4.26166	2.03e-05	0.00325428	ENSG00000168913	ENHO
2963	ENSG00000114395.11	1478.93	0.712624	0.181808	3.91965	8.87e-05	0.00742483	ENSG00000114395	CYB561D2
10802	ENSG00000244187.8	2077.05	0.712301	0.19358	3.67963	0.000233575	0.0127933	ENSG00000244187	TMEM141
6812	ENSG00000160972.9	2256.27	0.711997	0.162698	4.3762	1.21e-05	0.00241259	ENSG00000160972	PPP1R16A
3733	ENSG00000124302.13	556.36	0.711619	0.215598	3.30067	0.000964541	0.0328839	ENSG00000124302	CHST8
7784	ENSG00000168350.8	326.621	0.711519	0.227864	3.12256	0.00179287	0.0484927	ENSG00000168350	DEGS2
6900	ENSG00000162302.13	1469.69	0.710709	0.178411	3.98356	6.79e-05	0.00628514	ENSG00000162302	RPS6KA4
127	ENSG00000007376.8	2190.48	0.71058	0.192152	3.69801	0.000217295	0.0123663	ENSG00000007376	RPUSD1
10060	ENSG00000198816.7	5466.86	0.709226	0.174931	4.05431	5.03e-05	0.00497878	ENSG00000198816	ZNF358
3828	ENSG00000125652.8	1802.46	0.708515	0.189663	3.73566	0.000187222	0.0115864	ENSG00000125652	ALKBH7
2075	ENSG00000104518.11	396.871	0.707837	0.246688	2.86936	0.00411306	0.0802767	ENSG00000104518	GSDMD
7743	ENSG00000168061.17	2575.3	0.705635	0.20582	3.42841	0.000607124	0.0241725	ENSG00000168061	SAC3D1
1621	ENSG00000100379.17	1579.9	0.705398	0.178035	3.96213	7.43e-05	0.00664936	ENSG00000100379	KCTD17
8718	ENSG00000177700.6	2515.9	0.703918	0.182503	3.85703	0.000114775	0.00871294	ENSG00000177700	POLR2L
231	ENSG00000013306.16	8325.54	0.703783	0.157979	4.45492	8.39e-06	0.00183781	ENSG00000013306	SLC25A39
1929	ENSG00000102996.5	4270.51	0.703211	0.166677	4.219	2.45e-05	0.00340758	ENSG00000102996	MMP15
11034	ENSG00000261236.8	2933.41	0.701747	0.195279	3.59356	0.000326188	0.0159412	ENSG00000261236	BOP1
3652	ENSG00000123159.16	5065.05	0.701515	0.18279	3.83781	0.000124136	0.00923881	ENSG00000123159	GIPC1
1525	ENSG00000099958.15	792.844	0.701471	0.179871	3.89985	9.63e-05	0.00766223	ENSG00000099958	DERL3
7979	ENSG00000169972.12	930.682	0.701461	0.182208	3.84978	0.000118225	0.00891545	ENSG00000169972	PUSL1
7290	ENSG00000164889.14	12592.1	0.700069	0.218646	3.20184	0.00136554	0.0409194	ENSG00000164889	SLC4A2
7942	ENSG00000169696.16	2103.34	0.697602	0.208636	3.34363	0.000826892	0.0297029	ENSG00000169696	ASPSCR1
3984	ENSG00000127540.12	1563.68	0.695059	0.167622	4.14658	3.37e-05	0.0041322	ENSG00000127540	UQCR11
2131	ENSG00000104976.12	865.147	0.694953	0.195558	3.55369	0.000379863	0.0176551	ENSG00000104976	SNAPC2
2924	ENSG00000113763.12	3138.47	0.694888	0.16823	4.13058	3.62e-05	0.0042479	ENSG00000113763	UNC5A
10338	ENSG00000213339.9	1621.11	0.694549	0.164073	4.23317	2.3e-05	0.00334587	ENSG00000213339	QTRT1
3557	ENSG00000121680.16	1342.06	0.694204	0.183567	3.78175	0.000155728	0.01037	ENSG00000121680	PEX16
10519	ENSG00000224051.7	898.853	0.694094	0.189112	3.67028	0.000242289	0.0130139	ENSG00000224051	CPTP
9116	ENSG00000183048.12	4075.15	0.693751	0.174239	3.9816	6.85e-05	0.00628607	ENSG00000183048	SLC25A10
713	ENSG00000067221.14	1807.25	0.692816	0.192876	3.59202	0.000328123	0.0159672	ENSG00000067221	STOML1
8866	ENSG00000179627.10	636.813	0.690216	0.191316	3.60773	0.000308887	0.0154947	ENSG00000179627	ZBTB42
10722	ENSG00000240342.3	6019.33	0.68965	0.167943	4.10646	4.02e-05	0.00435717	ENSG00000240342	RPS2P5
5429	ENSG00000141873.11	4411.74	0.689603	0.18936	3.64176	0.000270779	0.0139518	ENSG00000141873	SLC39A3
124	ENSG00000007255.10	507.156	0.688203	0.211793	3.24941	0.00115643	0.0365929	ENSG00000007255	TRAPPC6A
9026	ENSG00000182154.8	2832.68	0.686934	0.171474	4.00604	6.17e-05	0.00581056	ENSG00000182154	MRPL41
6186	ENSG00000152082.15	9085.73	0.685861	0.167915	4.08458	4.42e-05	0.00458633	ENSG00000152082	MZT2B
6741	ENSG00000160226.16	979.477	0.685344	0.23081	2.9693	0.00298481	0.0665128	ENSG00000160226	CFAP410
1495	ENSG00000099624.8	3218.77	0.684821	0.198361	3.4524	0.000555621	0.0227909	ENSG00000099624	ATP5F1D
7454	ENSG00000166126.11	3997.16	0.684814	0.179777	3.80923	0.0001394	0.00988065	ENSG00000166126	AMN
9390	ENSG00000185803.12	4714.6	0.682721	0.194398	3.51197	0.000444804	0.0198627	ENSG00000185803	SLC52A2
9182	ENSG00000183751.15	2283.28	0.682186	0.220006	3.10077	0.0019302	0.0508778	ENSG00000183751	TBL3
1502	ENSG00000099800.8	2492.82	0.680872	0.179033	3.80304	0.000142929	0.00992399	ENSG00000099800	TIMM13
9051	ENSG00000182379.10	457.903	0.680491	0.235539	2.88908	0.00386368	0.0777232	ENSG00000182379	NXPH4
767	ENSG00000069275.13	5936.91	0.680444	0.167279	4.06773	4.75e-05	0.00478386	ENSG00000069275	NUCKS1
10543	ENSG00000225663.8	4537.2	0.679113	0.199886	3.3975	0.000680037	0.0261487	ENSG00000225663	MCRIP1
11329	ENSG00000283103.3	345.812	0.678286	0.221431	3.0632	0.00218985	0.0554179	ENSG00000283103	AC010642.2
2651	ENSG00000110719.10	408.548	0.677747	0.210382	3.2215	0.00127522	0.0392459	ENSG00000110719	TCIRG1
9166	ENSG00000183628.14	2812.34	0.675689	0.171631	3.93688	8.25e-05	0.00722649	ENSG00000183628	DGCR6
6067	ENSG00000149798.5	317.06	0.675395	0.254028	2.65874	0.00784332	0.123531	ENSG00000149798	CDC42EP2
4261	ENSG00000130881.14	5276.9	0.675251	0.17049	3.96065	7.47e-05	0.00664936	ENSG00000130881	LRP3
7428	ENSG00000165886.5	574.481	0.675203	0.225141	2.99902	0.00270852	0.0629427	ENSG00000165886	UBTD1
8330	ENSG00000173327.8	5741.09	0.673282	0.182048	3.69837	0.000216988	0.0123663	ENSG00000173327	MAP3K11
7408	ENSG00000165716.11	2162.26	0.671818	0.164573	4.08218	4.46e-05	0.00458633	ENSG00000165716	DIPK1B
8144	ENSG00000171425.10	673.927	0.671152	0.213237	3.14744	0.00164706	0.0459683	ENSG00000171425	ZNF581
9551	ENSG00000188186.10	2589.77	0.671098	0.192994	3.47731	0.000506481	0.0216915	ENSG00000188186	LAMTOR4
9393	ENSG00000185818.8	937.798	0.670127	0.212442	3.1544	0.0016083	0.0454435	ENSG00000185818	NAT8L
9402	ENSG00000185909.15	2498.41	0.670119	0.1828	3.66587	0.0002465	0.0131323	ENSG00000185909	KLHDC8B
3941	ENSG00000126768.12	10100.5	0.670073	0.194454	3.44592	0.000569113	0.0230499	ENSG00000126768	TIMM17B
6848	ENSG00000161618.10	1014.47	0.669736	0.197629	3.38885	0.000701854	0.0263763	ENSG00000161618	ALDH16A1
3815	ENSG00000125520.14	9546.26	0.669286	0.164877	4.05932	4.92e-05	0.00491606	ENSG00000125520	SLC2A4RG
11211	ENSG00000274012.1	1391.97	0.668056	0.192424	3.4718	0.000516985	0.0220484	ENSG00000274012	RN7SL2
11272	ENSG00000277972.2	1384.91	0.66711	0.176109	3.78805	0.000151832	0.0101701	ENSG00000277972	CISD3
10348	ENSG00000213445.10	1213.34	0.666957	0.212693	3.13577	0.00171404	0.0471445	ENSG00000213445	SIPA1
4327	ENSG00000131591.17	557.108	0.666868	0.204085	3.2676	0.00108465	0.0353481	ENSG00000131591	C1orf159
3850	ENSG00000125817.8	13040.1	0.665952	0.193184	3.44724	0.000566349	0.0230322	ENSG00000125817	CENPB
916	ENSG00000075043.18	3407.32	0.665596	0.17883	3.72195	0.000197688	0.0118478	ENSG00000075043	KCNQ2
4027	ENSG00000128228.5	2456.08	0.665399	0.173971	3.82476	0.000130898	0.00955469	ENSG00000128228	SDF2L1
4035	ENSG00000128309.16	3581.4	0.663811	0.195164	3.40129	0.000670677	0.0260648	ENSG00000128309	MPST
10701	ENSG00000238227.8	2661.8	0.66251	0.173952	3.80858	0.000139765	0.00988065	ENSG00000238227	TMEM250
9112	ENSG00000183018.9	414.226	0.66189	0.217166	3.04785	0.00230487	0.0573048	ENSG00000183018	SPNS2
10575	ENSG00000228300.14	1263.35	0.661433	0.207809	3.18289	0.00145813	0.0427932	ENSG00000228300	FAM174C
2304	ENSG00000106399.11	339.685	0.661039	0.252668	2.61623	0.00889054	0.133911	ENSG00000106399	RPA3
8152	ENSG00000171462.15	310.674	0.660175	0.228792	2.88548	0.00390815	0.0780739	ENSG00000171462	DLK2
4232	ENSG00000130731.16	1647.49	0.659894	0.204924	3.22018	0.0012811	0.0393204	ENSG00000130731	METTL26
152	ENSG00000008382.16	1016.08	0.658942	0.201689	3.26712	0.00108649	0.0353481	ENSG00000008382	MPND
8477	ENSG00000174917.9	1614.7	0.658582	0.182045	3.61768	0.000297253	0.0150437	ENSG00000174917	MICOS13
5422	ENSG00000141753.7	625.808	0.657967	0.221894	2.96524	0.00302452	0.0670042	ENSG00000141753	IGFBP4
5609	ENSG00000143774.16	5137.06	0.65745	0.167405	3.92731	8.59e-05	0.00735468	ENSG00000143774	GUK1
8610	ENSG00000176428.6	749.728	0.656667	0.190135	3.45368	0.000552989	0.0227909	ENSG00000176428	VPS37D
3898	ENSG00000126106.14	798.388	0.656049	0.177461	3.69686	0.000218287	0.0123663	ENSG00000126106	TMEM53
6048	ENSG00000149541.10	6633.2	0.655928	0.196301	3.34145	0.00083343	0.0298436	ENSG00000149541	B3GAT3
1313	ENSG00000089356.18	1032.98	0.655877	0.192293	3.41082	0.000647684	0.0254243	ENSG00000089356	FXYD3
9920	ENSG00000197982.14	3582.41	0.655541	0.193111	3.39464	0.000687183	0.0261704	ENSG00000197982	C1orf122
8416	ENSG00000174276.7	890.96	0.655205	0.20954	3.12687	0.00176679	0.0479915	ENSG00000174276	ZNHIT2
3919	ENSG00000126432.14	10516	0.655099	0.17207	3.80716	0.000140569	0.00988065	ENSG00000126432	PRDX5
8661	ENSG00000177096.9	575.139	0.65497	0.206529	3.17133	0.00151744	0.0440794	ENSG00000177096	PHETA2
5456	ENSG00000142327.13	5685.83	0.654828	0.187588	3.49077	0.000481633	0.0211706	ENSG00000142327	RNPEPL1
4331	ENSG00000131669.10	352.991	0.654821	0.228675	2.86354	0.00418935	0.0811294	ENSG00000131669	NINJ1
11245	ENSG00000276168.1	1083.09	0.654574	0.222349	2.9439	0.00324101	0.0693711	ENSG00000276168	RN7SL1
8229	ENSG00000172264.17	372.588	0.654094	0.21541	3.03651	0.00239334	0.0582064	ENSG00000172264	MACROD2
8779	ENSG00000178531.6	3160.06	0.653785	0.196627	3.32499	0.000884203	0.0311716	ENSG00000178531	CTXN1
6623	ENSG00000158747.15	1002.24	0.652528	0.230018	2.83686	0.00455593	0.0856079	ENSG00000158747	NBL1
4788	ENSG00000135940.7	2544.58	0.652363	0.164586	3.96365	7.38e-05	0.00664936	ENSG00000135940	COX5B
8896	ENSG00000180089.6	859.249	0.650788	0.2007	3.24259	0.00118448	0.0370541	ENSG00000180089	TMEM86B
1973	ENSG00000103260.9	770.57	0.650563	0.213233	3.05096	0.00228115	0.0569636	ENSG00000103260	METRN
4058	ENSG00000128626.11	1268.86	0.650519	0.209115	3.11082	0.00186567	0.0498695	ENSG00000128626	MRPS12
5834	ENSG00000146540.15	1470.32	0.650513	0.193721	3.35798	0.00078513	0.0283818	ENSG00000146540	C7orf50
7151	ENSG00000163975.12	705.169	0.649238	0.185296	3.50379	0.000458695	0.0203554	ENSG00000163975	MELTF
9597	ENSG00000188760.10	3875.14	0.649183	0.192898	3.36542	0.000764263	0.0279036	ENSG00000188760	TMEM198
10317	ENSG00000212864.3	768.576	0.648821	0.205378	3.15915	0.00158229	0.0452703	ENSG00000212864	RNF208
2232	ENSG00000105701.16	10473	0.648328	0.18944	3.42233	0.000620867	0.0245479	ENSG00000105701	FKBP8
1360	ENSG00000090932.11	275.071	0.6467	0.24674	2.62098	0.00876784	0.133119	ENSG00000090932	DLL3
6759	ENSG00000160360.13	2584.92	0.646558	0.168778	3.83083	0.000127714	0.00944335	ENSG00000160360	GPSM1
5426	ENSG00000141854.9	878.12	0.645625	0.175852	3.67142	0.000241204	0.0130139	ENSG00000141854	MISP3
7095	ENSG00000163702.20	442.138	0.645353	0.218274	2.95662	0.00311034	0.0679798	ENSG00000163702	IL17RC
8571	ENSG00000175938.7	679.099	0.644965	0.184869	3.48877	0.000485248	0.0211706	ENSG00000175938	ORAI3
8123	ENSG00000171222.10	9839.16	0.643372	0.181308	3.5485	0.000387425	0.0178503	ENSG00000171222	SCAND1
333	ENSG00000030110.13	1627.08	0.642195	0.188889	3.39985	0.00067423	0.0261138	ENSG00000030110	BAK1
1985	ENSG00000103363.15	5256.28	0.642032	0.170599	3.76341	0.000167613	0.0106626	ENSG00000103363	ELOB
6765	ENSG00000160446.19	3388.39	0.641658	0.185667	3.45596	0.00054834	0.0227909	ENSG00000160446	ZDHHC12
8630	ENSG00000176720.6	1453.87	0.641176	0.216077	2.96734	0.00300384	0.0667338	ENSG00000176720	BOK
3257	ENSG00000117410.14	12834.8	0.640454	0.1698	3.77181	0.000162066	0.01053	ENSG00000117410	ATP6V0B
3639	ENSG00000122971.9	753.1	0.639024	0.214243	2.98271	0.0028571	0.0648316	ENSG00000122971	ACADS
837	ENSG00000071889.17	2826.62	0.638673	0.179975	3.54867	0.000387188	0.0178503	ENSG00000071889	FAM3A
4517	ENSG00000133477.17	1477	0.6385	0.199129	3.20646	0.00134381	0.0408834	ENSG00000133477	FAM83F
397	ENSG00000040608.14	1100.62	0.638149	0.172188	3.70613	0.000210452	0.0121646	ENSG00000040608	RTN4R
10765	ENSG00000242372.9	5570.93	0.638131	0.169837	3.75732	0.000171745	0.0107454	ENSG00000242372	EIF6
602	ENSG00000063241.8	1566.31	0.63751	0.172547	3.6947	0.00022015	0.0124101	ENSG00000063241	ISOC2
2621	ENSG00000110245.12	471.747	0.63708	0.200079	3.18415	0.0014518	0.0427932	ENSG00000110245	APOC3
1491	ENSG00000099377.14	439.931	0.636901	0.221395	2.87676	0.00401786	0.0794296	ENSG00000099377	HSD3B7
1226	ENSG00000087086.15	98765.2	0.636491	0.150023	4.24261	2.21e-05	0.00334587	ENSG00000087086	FTL
7722	ENSG00000167969.13	3317.43	0.635572	0.189186	3.3595	0.000780839	0.0283166	ENSG00000167969	ECI1
9581	ENSG00000188573.8	2378.11	0.635473	0.188599	3.36944	0.00075322	0.0278297	ENSG00000188573	FBLL1
8598	ENSG00000176340.4	9822.09	0.635285	0.162921	3.89934	9.65e-05	0.00766223	ENSG00000176340	COX8A
22	ENSG00000002933.9	388.483	0.635282	0.215611	2.94642	0.00321473	0.0691987	ENSG00000002933	TMEM176A
9546	ENSG00000188157.15	3231.94	0.634627	0.192369	3.299	0.000970295	0.0329813	ENSG00000188157	AGRN
3973	ENSG00000127399.15	3787.33	0.634571	0.191432	3.31486	0.000916881	0.0319282	ENSG00000127399	LRRC61
7604	ENSG00000167114.13	4723.63	0.633837	0.190695	3.32383	0.000887902	0.0312054	ENSG00000167114	SLC27A4
6815	ENSG00000160999.10	508.616	0.633678	0.224904	2.81755	0.0048392	0.0889109	ENSG00000160999	SH2B2
5481	ENSG00000142684.9	727.539	0.633069	0.191334	3.30871	0.000937253	0.0323773	ENSG00000142684	ZNF593
3064	ENSG00000115457.10	3091.34	0.631801	0.156084	4.04782	5.17e-05	0.0050748	ENSG00000115457	IGFBP2
4361	ENSG00000132004.13	525.326	0.631556	0.21842	2.89148	0.00383431	0.0776892	ENSG00000132004	FBXW9
2646	ENSG00000110697.13	6693.31	0.631128	0.146201	4.31684	1.58e-05	0.00273078	ENSG00000110697	PITPNM1
4028	ENSG00000128242.13	2194.94	0.629752	0.176738	3.5632	0.000366358	0.0172009	ENSG00000128242	GAL3ST1
1784	ENSG00000101400.6	3021.12	0.629227	0.196506	3.20207	0.00136444	0.0409194	ENSG00000101400	SNTA1
1091	ENSG00000081692.12	1181.55	0.628877	0.201539	3.12037	0.00180622	0.0487379	ENSG00000081692	JMJD4
8648	ENSG00000176978.14	6420.3	0.627968	0.171534	3.6609	0.000251333	0.0132497	ENSG00000176978	DPP7
2186	ENSG00000105404.11	4443.82	0.627731	0.198548	3.16161	0.00156902	0.0452315	ENSG00000105404	RABAC1
3176	ENSG00000116544.12	1634.2	0.627011	0.170406	3.6795	0.000233688	0.0127933	ENSG00000116544	DLGAP3
2200	ENSG00000105518.14	2195.21	0.626726	0.17986	3.48452	0.000493016	0.0213459	ENSG00000105518	TMEM205
8084	ENSG00000170892.12	3448.3	0.626722	0.168348	3.72277	0.000197053	0.0118478	ENSG00000170892	TSEN34
4017	ENSG00000128011.5	794.63	0.626181	0.238244	2.62832	0.00858075	0.131404	ENSG00000128011	LRFN1
685	ENSG00000066379.15	412.032	0.625906	0.214492	2.91809	0.00352181	0.0737702	ENSG00000066379	ZNRD1
8049	ENSG00000170604.5	3801.55	0.625318	0.200689	3.11586	0.00183407	0.0492561	ENSG00000170604	IRF2BP1
5420	ENSG00000141738.14	769.717	0.625216	0.18532	3.37371	0.00074162	0.0275076	ENSG00000141738	GRB7
7697	ENSG00000167747.15	3683.22	0.625191	0.165888	3.76875	0.000164067	0.01053	ENSG00000167747	C19orf48
132	ENSG00000007541.17	5173.18	0.624966	0.187905	3.32596	0.000881145	0.0311602	ENSG00000007541	PIGQ
7179	ENSG00000164081.13	2587.8	0.624531	0.167637	3.72549	0.000194934	0.0118478	ENSG00000164081	TEX264
4855	ENSG00000136490.9	918.639	0.624089	0.205693	3.03408	0.0024127	0.0582064	ENSG00000136490	LIMD2
6929	ENSG00000162585.17	2593.4	0.62328	0.175846	3.54448	0.000393393	0.0179902	ENSG00000162585	FAAP20
4147	ENSG00000129993.15	659.103	0.622655	0.218044	2.85564	0.00429507	0.082406	ENSG00000129993	CBFA2T3
9111	ENSG00000183011.13	1956.01	0.619758	0.179016	3.46203	0.00053611	0.0226099	ENSG00000183011	NAA38
10581	ENSG00000228594.4	1985.54	0.619458	0.169414	3.65647	0.000255713	0.0134103	ENSG00000228594	FNDC10
2603	ENSG00000110046.13	4799.7	0.619397	0.190466	3.25201	0.00114592	0.0365507	ENSG00000110046	ATG2A
8889	ENSG00000179965.12	456.814	0.618542	0.209778	2.94856	0.00319259	0.068983	ENSG00000179965	ZNF771
9428	ENSG00000186193.9	1408.25	0.618409	0.16767	3.68825	0.000225802	0.0125425	ENSG00000186193	SAPCD2
9727	ENSG00000196557.13	9684.44	0.617728	0.165886	3.7238	0.000196244	0.0118478	ENSG00000196557	CACNA1H
8087	ENSG00000170906.16	1303.04	0.617203	0.178039	3.46668	0.000526934	0.0223888	ENSG00000170906	NDUFA3
7122	ENSG00000163870.16	1683.78	0.617133	0.186535	3.3084	0.000938307	0.0323773	ENSG00000163870	TPRA1
11128	ENSG00000269313.5	1105.35	0.616392	0.218011	2.82735	0.00469349	0.0870436	ENSG00000269313	MAGIX
7463	ENSG00000166165.13	8514.54	0.615876	0.158738	3.87983	0.000104531	0.00809724	ENSG00000166165	CKB
11136	ENSG00000269858.6	4221.69	0.615772	0.170906	3.603	0.00031457	0.015642	ENSG00000269858	EGLN2
8407	ENSG00000174165.8	1521.23	0.614102	0.179725	3.41689	0.000633407	0.0249571	ENSG00000174165	ZDHHC24
6810	ENSG00000160957.14	3280.91	0.613776	0.208223	2.94769	0.00320156	0.0690458	ENSG00000160957	RECQL4
8513	ENSG00000175221.15	3372.98	0.613677	0.191558	3.20361	0.00135716	0.0408834	ENSG00000175221	MED16
6456	ENSG00000156381.9	2199.15	0.61314	0.186693	3.28422	0.00102266	0.0339506	ENSG00000156381	ANKRD9
639	ENSG00000065057.9	778.767	0.61278	0.208568	2.93803	0.00330301	0.0700398	ENSG00000065057	NTHL1
9888	ENSG00000197779.14	436.636	0.612643	0.215079	2.84846	0.00439311	0.0836066	ENSG00000197779	ZNF81
88	ENSG00000006118.15	12759	0.61111	0.190711	3.20438	0.00135352	0.0408834	ENSG00000006118	TMEM132A
4145	ENSG00000129968.16	3409.01	0.610647	0.180395	3.38506	0.000711639	0.0265999	ENSG00000129968	ABHD17A
7097	ENSG00000163704.12	1295.44	0.610415	0.164482	3.71113	0.000206337	0.0119921	ENSG00000163704	PRRT3
6819	ENSG00000161016.17	39051.4	0.610226	0.165049	3.69724	0.000217959	0.0123663	ENSG00000161016	RPL8
7660	ENSG00000167543.16	7278.6	0.610156	0.187623	3.25204	0.0011458	0.0365507	ENSG00000167543	TP53I13
2967	ENSG00000114439.19	714.091	0.609542	0.196433	3.10305	0.00191535	0.0506035	ENSG00000114439	BBX
6561	ENSG00000157870.17	1731.84	0.609153	0.163138	3.73398	0.000188478	0.0116011	ENSG00000157870	PRXL2B
5269	ENSG00000140323.6	2227.13	0.608545	0.217016	2.80415	0.00504492	0.0916212	ENSG00000140323	DISP2
10592	ENSG00000229833.10	742.089	0.607423	0.186165	3.26281	0.00110312	0.0355841	ENSG00000229833	PET100
2496	ENSG00000108639.7	4585.62	0.60656	0.185773	3.26505	0.00109443	0.0354043	ENSG00000108639	SYNGR2
9164	ENSG00000183617.5	797.384	0.60643	0.198949	3.04816	0.00230246	0.0573048	ENSG00000183617	MRPL54
3402	ENSG00000119559.17	1518.02	0.606146	0.20077	3.0191	0.00253523	0.0598502	ENSG00000119559	C19orf25
646	ENSG00000065268.11	1986.12	0.604837	0.187553	3.22489	0.00126021	0.0388889	ENSG00000065268	WDR18
5454	ENSG00000142235.11	438.88	0.604126	0.211661	2.85421	0.00431433	0.0824923	ENSG00000142235	LMTK3
6542	ENSG00000157593.19	4048.01	0.603424	0.160147	3.76793	0.000164604	0.01053	ENSG00000157593	SLC35B2
10637	ENSG00000233927.5	8459.94	0.603324	0.163682	3.68594	0.000227857	0.0125952	ENSG00000233927	RPS28
10914	ENSG00000254647.7	720116	0.601735	0.165482	3.63626	0.00027662	0.0141886	ENSG00000254647	INS
1212	ENSG00000086504.17	2958.21	0.600049	0.17597	3.40996	0.000649729	0.0254243	ENSG00000086504	MRPL28
7701	ENSG00000167775.11	6597.41	0.600042	0.196161	3.05893	0.00222132	0.0559605	ENSG00000167775	CD320
1333	ENSG00000090097.21	4688.62	0.59996	0.156096	3.84352	0.00012128	0.00908563	ENSG00000090097	PCBP4
189	ENSG00000011009.11	4416.63	0.599929	0.188451	3.18347	0.00145521	0.0427932	ENSG00000011009	LYPLA2
5673	ENSG00000144485.11	17589.3	0.598281	0.18094	3.30652	0.000944624	0.0324968	ENSG00000144485	HES6
9246	ENSG00000184436.12	2110.47	0.597986	0.182349	3.27935	0.00104048	0.0341438	ENSG00000184436	THAP7
131	ENSG00000007520.4	3121.97	0.597879	0.192667	3.10317	0.00191463	0.0506035	ENSG00000007520	TSR3
7308	ENSG00000164967.10	651.798	0.597325	0.20027	2.9826	0.00285812	0.0648316	ENSG00000164967	RPP25L
8315	ENSG00000173171.14	2195.79	0.595791	0.173448	3.43499	0.000592576	0.023676	ENSG00000173171	MTX1
3893	ENSG00000126062.4	3949.15	0.59555	0.175338	3.39658	0.000682348	0.0261487	ENSG00000126062	TMEM115
7677	ENSG00000167645.17	1756.54	0.594848	0.180713	3.29167	0.00099595	0.0334539	ENSG00000167645	YIF1B
4214	ENSG00000130643.9	1656.59	0.594658	0.194515	3.05712	0.00223472	0.0561739	ENSG00000130643	CALY
6928	ENSG00000162552.15	4662.82	0.59445	0.155808	3.81526	0.000136038	0.00974256	ENSG00000162552	WNT4
1953	ENSG00000103152.12	1404.69	0.594226	0.180304	3.29569	0.000981786	0.0332726	ENSG00000103152	MPG
10759	ENSG00000242114.6	432.931	0.593973	0.216005	2.74981	0.00596298	0.102879	ENSG00000242114	MTFP1
6069	ENSG00000149809.16	6023.45	0.593721	0.175127	3.39023	0.000698336	0.0263763	ENSG00000149809	TM7SF2
5870	ENSG00000147123.11	12182.5	0.593671	0.165391	3.58951	0.000331306	0.0159855	ENSG00000147123	NDUFB11
4500	ENSG00000133247.14	1801.05	0.593595	0.170704	3.47733	0.000506425	0.0216915	ENSG00000133247	KMT5C
8578	ENSG00000176058.13	1690.96	0.59353	0.192244	3.08739	0.00201924	0.0521384	ENSG00000176058	TPRN
11369	ENSG00000286070.2	472.897	0.593003	0.223202	2.6568	0.00788863	0.1239	ENSG00000286070	AP000356.5
4646	ENSG00000134825.16	1740.66	0.591533	0.165536	3.57345	0.000352309	0.0167156	ENSG00000134825	TMEM258
492	ENSG00000053371.12	4641.91	0.5908	0.177	3.33786	0.000844274	0.0301372	ENSG00000053371	AKR7A2
7650	ENSG00000167508.12	17116.4	0.589655	0.203735	2.89422	0.00380097	0.0772887	ENSG00000167508	MVD
2650	ENSG00000110717.13	4083.23	0.589135	0.187258	3.1461	0.00165461	0.0460554	ENSG00000110717	NDUFS8
11105	ENSG00000267534.4	413.835	0.589064	0.224177	2.62767	0.00859714	0.131404	ENSG00000267534	S1PR2
9357	ENSG00000185504.17	3546.13	0.58896	0.198038	2.97397	0.00293973	0.0658952	ENSG00000185504	FAAP100
7647	ENSG00000167476.10	6312.29	0.588776	0.164438	3.58054	0.000342884	0.0164051	ENSG00000167476	JSRP1
1508	ENSG00000099821.14	3568.17	0.588363	0.18436	3.19138	0.00141594	0.0419878	ENSG00000099821	POLRMT
3931	ENSG00000126603.9	4661.55	0.588337	0.155991	3.7716	0.000162201	0.01053	ENSG00000126603	GLIS2
1963	ENSG00000103202.13	3822.44	0.588128	0.150254	3.91422	9.07e-05	0.00742985	ENSG00000103202	NME4
2077	ENSG00000104524.14	928.139	0.58782	0.193607	3.03615	0.00239624	0.0582064	ENSG00000104524	PYCR3
1539	ENSG00000100033.16	3213.07	0.587529	0.154948	3.79177	0.000149576	0.0101701	ENSG00000100033	PRODH
9321	ENSG00000185187.13	2553.36	0.587462	0.178307	3.29467	0.000985382	0.0332954	ENSG00000185187	SIGIRR
6701	ENSG00000159792.10	2941.32	0.586596	0.189675	3.09264	0.00198383	0.0515751	ENSG00000159792	PSKH1
8864	ENSG00000179588.9	4816.81	0.586589	0.169498	3.46074	0.000538685	0.0226347	ENSG00000179588	ZFPM1
9128	ENSG00000183248.12	4044.47	0.585158	0.200924	2.91234	0.00358734	0.074341	ENSG00000183248	PRR36
9969	ENSG00000198324.13	2186.41	0.58478	0.194851	3.00116	0.00268952	0.0626913	ENSG00000198324	PHETA1
8388	ENSG00000173898.14	5684.55	0.584691	0.18521	3.15691	0.00159451	0.0453918	ENSG00000173898	SPTBN2
10246	ENSG00000205138.4	1179.88	0.583799	0.200378	2.91349	0.00357418	0.0742686	ENSG00000205138	SDHAF1
6702	ENSG00000159840.16	964.19	0.583798	0.201012	2.90429	0.00368084	0.0757002	ENSG00000159840	ZYX
7699	ENSG00000167771.6	2096.51	0.583535	0.162633	3.58805	0.000333166	0.0160074	ENSG00000167771	RCOR2
2819	ENSG00000112514.18	8804.2	0.58305	0.173078	3.36872	0.000755193	0.0278297	ENSG00000112514	CUTA
7756	ENSG00000168159.13	4570.3	0.582724	0.168703	3.45413	0.000552071	0.0227909	ENSG00000168159	RNF187
8266	ENSG00000172663.9	1322.54	0.58224	0.184703	3.15231	0.00161986	0.045544	ENSG00000172663	TMEM134
1583	ENSG00000100241.21	11644.8	0.581398	0.188732	3.08055	0.00206616	0.053036	ENSG00000100241	SBF1
2643	ENSG00000110651.12	9741.32	0.581173	0.156401	3.71592	0.000202469	0.011915	ENSG00000110651	CD81
8825	ENSG00000179085.8	2156.99	0.580408	0.176806	3.28273	0.00102808	0.0340113	ENSG00000179085	DPM3
3649	ENSG00000123143.13	9904.88	0.580241	0.175358	3.30889	0.000936666	0.0323773	ENSG00000123143	PKN1
10549	ENSG00000225972.1	20542.7	0.579994	0.178091	3.25673	0.00112703	0.0361508	ENSG00000225972	MTND1P23
6802	ENSG00000160867.15	4378.81	0.578096	0.198161	2.9173	0.00353076	0.0737702	ENSG00000160867	FGFR4
2846	ENSG00000112787.13	7395.71	0.578	0.166791	3.46542	0.000529402	0.02241	ENSG00000112787	FBRSL1
1545	ENSG00000100065.15	2277.61	0.577948	0.180553	3.20098	0.00136961	0.0409337	ENSG00000100065	CARD10
5459	ENSG00000142409.6	1361.12	0.577334	0.186774	3.09108	0.00199429	0.0517289	ENSG00000142409	ZNF787
8750	ENSG00000178057.15	2202.34	0.577141	0.16719	3.45202	0.000556413	0.0227909	ENSG00000178057	NDUFAF3
8860	ENSG00000179526.17	1971.12	0.576996	0.190563	3.02785	0.00246297	0.0591684	ENSG00000179526	SHARPIN
8826	ENSG00000179091.5	4381.7	0.576057	0.173051	3.32882	0.000872135	0.0309377	ENSG00000179091	CYC1
1979	ENSG00000103326.12	3427.2	0.575552	0.189929	3.03035	0.00244269	0.0588054	ENSG00000103326	CAPN15
6841	ENSG00000161395.14	852.621	0.575537	0.221416	2.59935	0.00934013	0.138044	ENSG00000161395	PGAP3
1477	ENSG00000099203.7	1619.57	0.575528	0.191788	3.00086	0.0026922	0.0626913	ENSG00000099203	TMED1
6876	ENSG00000162062.15	1463.55	0.57341	0.187195	3.06317	0.00219005	0.0554179	ENSG00000162062	TEDC2
3184	ENSG00000116649.10	2811.37	0.573406	0.193568	2.96229	0.00305359	0.067386	ENSG00000116649	SRM
5337	ENSG00000140988.16	53112.9	0.572947	0.162806	3.5192	0.00043285	0.0195787	ENSG00000140988	RPS2
608	ENSG00000063660.9	4343.3	0.57279	0.168116	3.40712	0.000656531	0.0256025	ENSG00000063660	GPC1
3985	ENSG00000127554.13	1927.2	0.572643	0.166219	3.44511	0.000570832	0.0230499	ENSG00000127554	GFER
11277	ENSG00000278195.2	6069.71	0.572578	0.155851	3.67387	0.000238903	0.0129944	ENSG00000278195	SSTR3
32	ENSG00000004059.11	21822.4	0.572577	0.168596	3.39614	0.000683428	0.0261487	ENSG00000004059	ARF5
3052	ENSG00000115325.13	1019.75	0.572227	0.20385	2.8071	0.00499901	0.091224	ENSG00000115325	DOK1
8940	ENSG00000180900.20	8877.11	0.572217	0.208357	2.74633	0.00602655	0.103506	ENSG00000180900	SCRIB
1912	ENSG00000102890.16	1021.62	0.571565	0.193134	2.95943	0.00308209	0.0676219	ENSG00000102890	ELMO3
4950	ENSG00000137166.15	22289.6	0.571453	0.146563	3.89902	9.66e-05	0.00766223	ENSG00000137166	FOXP4
834	ENSG00000071655.18	8472.38	0.569698	0.212568	2.68007	0.00736068	0.118217	ENSG00000071655	MBD3
1786	ENSG00000101412.13	8600.01	0.569328	0.173466	3.28207	0.00103046	0.0340113	ENSG00000101412	E2F1
2992	ENSG00000114767.7	1017.12	0.569034	0.204103	2.78798	0.00530381	0.0949599	ENSG00000114767	RRP9
3819	ENSG00000125611.15	864.828	0.56901	0.197267	2.88447	0.00392069	0.0781736	ENSG00000125611	CHCHD5
10394	ENSG00000214026.11	2686.36	0.568608	0.180178	3.15581	0.00160051	0.0454435	ENSG00000214026	MRPL23
590	ENSG00000062582.14	2290.83	0.568434	0.17741	3.20408	0.00135497	0.0408834	ENSG00000062582	MRPS24
11082	ENSG00000265688.2	928.343	0.568258	0.195142	2.91202	0.00359103	0.074341	ENSG00000265688	MAFG-DT
604	ENSG00000063245.15	7908.34	0.567771	0.182876	3.10467	0.00190493	0.0506035	ENSG00000063245	EPN1
8270	ENSG00000172725.14	4872.98	0.567561	0.157844	3.5957	0.000323518	0.0159126	ENSG00000172725	CORO1B
4180	ENSG00000130313.7	4338.82	0.566271	0.194308	2.9143	0.0035649	0.0742112	ENSG00000130313	PGLS
10679	ENSG00000236824.2	1573.54	0.566035	0.197052	2.87252	0.00407218	0.0799481	ENSG00000236824	BCYRN1
10732	ENSG00000240972.2	17239.3	0.564463	0.151778	3.71901	0.000200007	0.0118831	ENSG00000240972	MIF
4293	ENSG00000131188.12	879.811	0.563756	0.190004	2.96708	0.00300645	0.0667338	ENSG00000131188	PRR7
8938	ENSG00000180879.14	10494.8	0.563459	0.157908	3.56827	0.000359343	0.0169786	ENSG00000180879	SSR4
3668	ENSG00000123395.14	2262.82	0.56307	0.196257	2.86905	0.00411712	0.0802767	ENSG00000123395	ATG101
4329	ENSG00000131652.14	1969.42	0.562515	0.197726	2.84492	0.00444222	0.0840257	ENSG00000131652	THOC6
8584	ENSG00000176108.9	707.878	0.561896	0.194849	2.88376	0.00392962	0.0781736	ENSG00000176108	CHMP6
10811	ENSG00000244731.8	1948.68	0.561525	0.16402	3.42351	0.000618171	0.0245265	ENSG00000244731	C4A
4291	ENSG00000131174.7	835.447	0.561501	0.190685	2.94464	0.00323327	0.0693357	ENSG00000131174	COX7B
10171	ENSG00000204308.8	2449.32	0.561347	0.161437	3.47718	0.000506712	0.0216915	ENSG00000204308	RNF5
6646	ENSG00000159069.14	9431.54	0.561317	0.173786	3.22993	0.00123821	0.0384183	ENSG00000159069	FBXW5
9282	ENSG00000184897.6	18325.4	0.561209	0.153151	3.66442	0.000247901	0.0131323	ENSG00000184897	H1-10
7392	ENSG00000165644.11	1366.17	0.560796	0.180648	3.10436	0.00190693	0.0506035	ENSG00000165644	COMTD1
10078	ENSG00000198858.10	3146.21	0.560627	0.186272	3.00972	0.00261488	0.0613932	ENSG00000198858	R3HDM4
7129	ENSG00000163888.4	1804.47	0.560125	0.200751	2.79014	0.00526854	0.0944769	ENSG00000163888	CAMK2N2
8146	ENSG00000171443.7	684.08	0.559914	0.199632	2.80473	0.00503586	0.0916212	ENSG00000171443	ZNF524
5365	ENSG00000141349.8	5460.77	0.558633	0.176872	3.15841	0.00158634	0.0452724	ENSG00000141349	G6PC3
10200	ENSG00000204498.11	2219.35	0.557878	0.201041	2.77495	0.00552102	0.0977727	ENSG00000204498	NFKBIL1
8409	ENSG00000174177.13	913.951	0.557733	0.190245	2.93166	0.00337155	0.0712279	ENSG00000174177	CTU2
6077	ENSG00000149932.17	2103.5	0.557403	0.18869	2.95406	0.0031362	0.0681726	ENSG00000149932	TMEM219
8113	ENSG00000171159.5	4788.67	0.557038	0.183586	3.03421	0.00241169	0.0582064	ENSG00000171159	C9orf16
6678	ENSG00000159423.17	1233.98	0.554963	0.179276	3.09557	0.00196432	0.0514201	ENSG00000159423	ALDH4A1
623	ENSG00000064545.15	2199.02	0.553531	0.183263	3.02042	0.00252427	0.0597585	ENSG00000064545	TMEM161A
9481	ENSG00000187051.9	3048.43	0.553343	0.176113	3.14197	0.00167815	0.0463812	ENSG00000187051	RPS19BP1
7954	ENSG00000169783.12	1055.42	0.552964	0.206658	2.67574	0.00745638	0.119417	ENSG00000169783	LINGO1
8775	ENSG00000178449.9	846.708	0.552668	0.182752	3.02413	0.00249346	0.0597585	ENSG00000178449	COX14
9453	ENSG00000186577.14	1579.05	0.552002	0.175532	3.14475	0.00166231	0.0460554	ENSG00000186577	SMIM29
8764	ENSG00000178209.15	6040.25	0.551453	0.179299	3.07561	0.00210071	0.053634	ENSG00000178209	PLEC
1547	ENSG00000100075.10	17069.8	0.551212	0.178969	3.07993	0.00207048	0.053036	ENSG00000100075	SLC25A1
5967	ENSG00000148362.11	2708.97	0.551073	0.180916	3.04601	0.00231903	0.0574431	ENSG00000148362	PAXX
8516	ENSG00000175274.19	3538.67	0.549159	0.157575	3.48506	0.000492026	0.0213459	ENSG00000175274	TP53I11
10626	ENSG00000233016.7	1544.04	0.547971	0.168836	3.24559	0.00117208	0.0368687	ENSG00000233016	SNHG7
3708	ENSG00000124140.14	616.272	0.54773	0.194815	2.81155	0.00493039	0.0901161	ENSG00000124140	SLC12A5
1841	ENSG00000101986.12	533.558	0.547654	0.202474	2.70482	0.00683421	0.113892	ENSG00000101986	ABCD1
7522	ENSG00000166482.12	3917.18	0.546826	0.180191	3.03471	0.00240771	0.0582064	ENSG00000166482	MFAP4
557	ENSG00000059122.17	1914.85	0.546677	0.192427	2.84096	0.0044978	0.0846949	ENSG00000059122	FLYWCH1
8541	ENSG00000175573.7	1269.22	0.546597	0.188277	2.90316	0.00369421	0.0757945	ENSG00000175573	C11orf68
7651	ENSG00000167513.9	4655.71	0.546172	0.163749	3.33543	0.000851679	0.0303065	ENSG00000167513	CDT1
10908	ENSG00000254402.7	1461.27	0.545607	0.200911	2.71567	0.0066142	0.111085	ENSG00000254402	LRRC24
10247	ENSG00000205155.8	1351.07	0.545361	0.198734	2.74418	0.00606626	0.103874	ENSG00000205155	PSENEN
8556	ENSG00000175756.13	3671.09	0.545045	0.177424	3.07199	0.0021264	0.0541685	ENSG00000175756	AURKAIP1
1057	ENSG00000080189.15	8429.1	0.54499	0.173028	3.14972	0.00163429	0.0457241	ENSG00000080189	SLC35C2
8713	ENSG00000177674.16	1035.96	0.544205	0.189561	2.87087	0.0040935	0.0800904	ENSG00000177674	AGTRAP
7439	ENSG00000165948.11	606.297	0.543531	0.210072	2.58735	0.00967169	0.140653	ENSG00000165948	IFI27L1
7763	ENSG00000168237.18	3183.36	0.543039	0.192938	2.81459	0.004884	0.0895557	ENSG00000168237	GLYCTK
3700	ENSG00000123989.14	14120.4	0.542559	0.181068	2.99644	0.0027315	0.063242	ENSG00000123989	CHPF
9307	ENSG00000185085.2	2334.71	0.542488	0.195015	2.78177	0.00540628	0.096491	ENSG00000185085	INTS5
1493	ENSG00000099385.11	1133.66	0.542175	0.182266	2.97464	0.00293333	0.0658814	ENSG00000099385	BCL7C
4337	ENSG00000131747.15	5595.08	0.541881	0.152191	3.56053	0.000370112	0.0172724	ENSG00000131747	TOP2A
1526	ENSG00000099960.13	929.495	0.54159	0.183632	2.94932	0.00318479	0.0689453	ENSG00000099960	SLC7A4
4171	ENSG00000130255.13	6535.53	0.541397	0.145218	3.72817	0.000192878	0.0118081	ENSG00000130255	RPL36
3392	ENSG00000119431.9	1014.49	0.541286	0.201795	2.68235	0.0073107	0.117884	ENSG00000119431	HDHD3
500	ENSG00000054148.18	3049.85	0.541276	0.159396	3.39579	0.000684316	0.0261487	ENSG00000054148	PHPT1
7641	ENSG00000167397.15	4108.28	0.54122	0.163884	3.30246	0.000958417	0.0328634	ENSG00000167397	VKORC1
9972	ENSG00000198355.5	959.567	0.541065	0.192412	2.81202	0.00492315	0.0901161	ENSG00000198355	PIM3
7585	ENSG00000166963.13	874.342	0.540269	0.188163	2.87128	0.00408808	0.0800904	ENSG00000166963	MAP1A
3403	ENSG00000119574.13	1046.48	0.540227	0.181763	2.97215	0.00295721	0.0661509	ENSG00000119574	ZBTB45
2445	ENSG00000108107.15	20249.8	0.539713	0.154626	3.49045	0.00048221	0.0211706	ENSG00000108107	RPL28
4281	ENSG00000131094.4	11531.6	0.539416	0.149072	3.6185	0.000296314	0.0150437	ENSG00000131094	C1QL1
8475	ENSG00000174903.16	11108	0.538671	0.17406	3.09475	0.00196982	0.0514458	ENSG00000174903	RAB1B
7818	ENSG00000168701.19	2017.25	0.538457	0.179206	3.00468	0.00265863	0.062164	ENSG00000168701	TMEM208
7292	ENSG00000164897.14	4406.42	0.53771	0.189075	2.8439	0.00445646	0.0841555	ENSG00000164897	TMUB1
2191	ENSG00000105429.13	3921.25	0.537405	0.186072	2.88816	0.00387504	0.0777232	ENSG00000105429	MEGF8
4502	ENSG00000133265.11	2965.84	0.536542	0.192639	2.78521	0.00534928	0.0956236	ENSG00000133265	HSPBP1
5960	ENSG00000148335.15	928.006	0.536534	0.180999	2.9643	0.00303377	0.0670787	ENSG00000148335	NTMT1
10738	ENSG00000241360.2	4794.83	0.536433	0.182553	2.93851	0.00329796	0.0700398	ENSG00000241360	PDXP
6064	ENSG00000149761.9	1164.36	0.535985	0.18819	2.84811	0.00439803	0.0836066	ENSG00000149761	NUDT22
10846	ENSG00000248487.9	2072.99	0.535387	0.16115	3.3223	0.000892785	0.0312804	ENSG00000248487	ABHD14A
7606	ENSG00000167123.19	1855.5	0.535347	0.178668	2.99633	0.00273251	0.063242	ENSG00000167123	CERCAM
7337	ENSG00000165215.6	5473.85	0.53421	0.157832	3.38467	0.00071263	0.0265999	ENSG00000165215	CLDN3
6621	ENSG00000158716.9	3037.12	0.534195	0.162655	3.28423	0.00102262	0.0339506	ENSG00000158716	DUSP23
8629	ENSG00000176715.17	1091.64	0.533247	0.175718	3.03468	0.00240791	0.0582064	ENSG00000176715	ACSF3
10591	ENSG00000229809.8	828.375	0.532858	0.192772	2.76418	0.00570659	0.0993592	ENSG00000229809	ZNF688
6068	ENSG00000149806.11	8837.4	0.532629	0.16312	3.26526	0.00109362	0.0354043	ENSG00000149806	FAU
7742	ENSG00000168056.16	1060.33	0.532433	0.19912	2.67393	0.00749679	0.119896	ENSG00000168056	LTBP3
7265	ENSG00000164638.10	10613.9	0.532099	0.165516	3.21479	0.0013054	0.0398514	ENSG00000164638	SLC29A4
6136	ENSG00000151366.13	1705.51	0.531737	0.175985	3.02149	0.00251533	0.0597585	ENSG00000151366	NDUFC2
4045	ENSG00000128564.7	9273.35	0.531385	0.154531	3.4387	0.00058452	0.0234364	ENSG00000128564	VGF
10574	ENSG00000228253.1	13247.1	0.531283	0.17394	3.0544	0.00225514	0.0565623	ENSG00000228253	MT-ATP8
10378	ENSG00000213859.6	748.011	0.530781	0.189867	2.79555	0.00518119	0.0933516	ENSG00000213859	KCTD11
8815	ENSG00000178980.15	2024.29	0.530305	0.163764	3.23823	0.00120276	0.0374202	ENSG00000178980	SELENOW
10162	ENSG00000204228.4	569.083	0.52991	0.192528	2.75238	0.00591637	0.102386	ENSG00000204228	HSD17B8
8690	ENSG00000177427.13	622.817	0.529303	0.195167	2.71205	0.00668691	0.111648	ENSG00000177427	MIEF2
1997	ENSG00000103495.14	25773.7	0.529233	0.183543	2.88343	0.00393374	0.0781736	ENSG00000103495	MAZ
10320	ENSG00000213015.9	1830.32	0.529092	0.171263	3.08936	0.00200591	0.051912	ENSG00000213015	ZNF580
6756	ENSG00000160326.14	4534.8	0.528294	0.160007	3.30169	0.000961054	0.0328634	ENSG00000160326	SLC2A6
6659	ENSG00000159199.14	2085.33	0.527888	0.1766	2.98917	0.00279736	0.0640916	ENSG00000159199	ATP5MC1
6861	ENSG00000161888.11	737.014	0.527779	0.195372	2.70141	0.0069046	0.114111	ENSG00000161888	SPC24
3988	ENSG00000127580.17	1790.68	0.527659	0.186448	2.83007	0.00465385	0.0870171	ENSG00000127580	WDR24
10709	ENSG00000239779.7	2730.05	0.527089	0.190633	2.76494	0.00569327	0.0993592	ENSG00000239779	WBP1
5395	ENSG00000141552.17	3639.26	0.527024	0.182188	2.89275	0.00381884	0.0775136	ENSG00000141552	ANAPC11
4023	ENSG00000128165.9	1311.45	0.526705	0.168051	3.13419	0.00172326	0.0471702	ENSG00000128165	ADM2
10404	ENSG00000214160.10	3849	0.526328	0.167333	3.14538	0.00165869	0.0460554	ENSG00000214160	ALG3
8254	ENSG00000172478.18	11240	0.526139	0.143582	3.66437	0.000247953	0.0131323	ENSG00000172478	MAB21L4
5446	ENSG00000142185.16	1856.23	0.524985	0.169747	3.09275	0.00198314	0.0515751	ENSG00000142185	TRPM2
1314	ENSG00000089486.17	4207.34	0.524536	0.16143	3.2493	0.00115688	0.0365929	ENSG00000089486	CDIP1
9614	ENSG00000188986.8	4666.9	0.524314	0.182489	2.87313	0.0040643	0.0799313	ENSG00000188986	NELFB
3484	ENSG00000120645.12	2613.06	0.524081	0.164816	3.17979	0.00147384	0.0431429	ENSG00000120645	IQSEC3
512	ENSG00000054967.13	1023.31	0.523088	0.192829	2.7127	0.00667366	0.11159	ENSG00000054967	RELT
8340	ENSG00000173457.11	4871.24	0.522919	0.188373	2.77597	0.00550365	0.0976236	ENSG00000173457	PPP1R14B
8471	ENSG00000174851.16	4599.94	0.522411	0.188875	2.76591	0.00567644	0.0993592	ENSG00000174851	YIF1A
6439	ENSG00000156113.24	1557.38	0.522068	0.172054	3.03433	0.00241068	0.0582064	ENSG00000156113	KCNMA1
10658	ENSG00000235173.7	1593.76	0.521735	0.180812	2.88551	0.00390775	0.0780739	ENSG00000235173	HGH1
5006	ENSG00000137700.18	10214	0.519172	0.170625	3.04277	0.00234415	0.057902	ENSG00000137700	SLC37A4
8540	ENSG00000175567.10	4690.16	0.518028	0.177353	2.92089	0.0034903	0.0736001	ENSG00000175567	UCP2
2217	ENSG00000105640.13	22668.5	0.517505	0.160854	3.21722	0.00129437	0.039621	ENSG00000105640	RPL18A
3840	ENSG00000125744.12	3152.18	0.5169	0.198963	2.59797	0.00937778	0.138322	ENSG00000125744	RTN2
4231	ENSG00000130726.12	21166.8	0.516285	0.153367	3.36634	0.000761717	0.0279036	ENSG00000130726	TRIM28
6808	ENSG00000160949.17	1355.39	0.515456	0.178412	2.88913	0.00386309	0.0777232	ENSG00000160949	TONSL
10313	ENSG00000211584.14	1074.79	0.515157	0.170541	3.02073	0.00252169	0.0597585	ENSG00000211584	SLC48A1
5210	ENSG00000139546.11	1282.6	0.515125	0.187442	2.74818	0.00599278	0.103081	ENSG00000139546	TARBP2
5031	ENSG00000137868.19	8534.21	0.514912	0.142838	3.60485	0.00031233	0.0155987	ENSG00000137868	STRA6
4042	ENSG00000128524.5	4713.02	0.51469	0.159518	3.22653	0.001253	0.0387714	ENSG00000128524	ATP6V1F
6072	ENSG00000149925.22	19049.7	0.514579	0.175257	2.93614	0.00332329	0.0703388	ENSG00000149925	ALDOA
3694	ENSG00000123815.12	2309.17	0.514493	0.173138	2.97158	0.00296276	0.0661509	ENSG00000123815	COQ8B
4711	ENSG00000135390.21	6581.72	0.514023	0.17016	3.02081	0.00252098	0.0597585	ENSG00000135390	ATP5MC2
7032	ENSG00000163382.12	7136.04	0.513894	0.164883	3.11673	0.00182869	0.0492278	ENSG00000163382	NAXE
3555	ENSG00000121653.11	9782.16	0.513529	0.148633	3.45502	0.000550246	0.0227909	ENSG00000121653	MAPK8IP1
4230	ENSG00000130725.8	4548.55	0.513334	0.169122	3.03528	0.00240312	0.0582064	ENSG00000130725	UBE2M
10350	ENSG00000213465.8	3109.12	0.513251	0.19373	2.6493	0.00806581	0.125988	ENSG00000213465	ARL2
7431	ENSG00000165905.18	2373.35	0.513217	0.195366	2.62695	0.00861545	0.131422	ENSG00000165905	LARGE2
7025	ENSG00000163344.6	2110.91	0.513004	0.182914	2.80461	0.00503771	0.0916212	ENSG00000163344	PMVK
8581	ENSG00000176101.12	2660.55	0.512745	0.173536	2.95468	0.00312989	0.0681726	ENSG00000176101	SSNA1
8844	ENSG00000179292.5	1658.92	0.512381	0.188857	2.71307	0.00666629	0.11159	ENSG00000179292	TMEM151A
3976	ENSG00000127445.14	4577.63	0.511884	0.17122	2.98962	0.00279321	0.0640916	ENSG00000127445	PIN1
11014	ENSG00000260293.2	2490.78	0.511765	0.161664	3.1656	0.00154763	0.044728	ENSG00000260293	AC106820.4
4846	ENSG00000136425.14	978.267	0.511134	0.173067	2.95338	0.00314311	0.0681726	ENSG00000136425	CIB2
8177	ENSG00000171703.17	1783.37	0.510893	0.177704	2.87496	0.00404073	0.0797431	ENSG00000171703	TCEA2
6950	ENSG00000162729.14	3712.42	0.510699	0.196847	2.59439	0.00947589	0.13895	ENSG00000162729	IGSF8
8881	ENSG00000179921.15	1915.75	0.510552	0.170627	2.9922	0.00276972	0.0638438	ENSG00000179921	GPBAR1
3309	ENSG00000117984.14	25421.9	0.510057	0.164277	3.10486	0.0019037	0.0506035	ENSG00000117984	CTSD
6397	ENSG00000155366.17	1233.86	0.509837	0.187185	2.7237	0.00645547	0.10874	ENSG00000155366	RHOC
11317	ENSG00000280987.4	722.841	0.509832	0.188682	2.70207	0.00689093	0.114111	ENSG00000280987	MATR3
1800	ENSG00000101473.17	2292.83	0.509437	0.176398	2.888	0.00387695	0.0777232	ENSG00000101473	ACOT8
5682	ENSG00000144579.7	3597.64	0.509317	0.165383	3.07962	0.00207263	0.053036	ENSG00000144579	CTDSP1
7712	ENSG00000167900.12	1310.71	0.508996	0.192235	2.64778	0.00810221	0.12621	ENSG00000167900	TK1
157	ENSG00000008735.14	6906.32	0.508103	0.181623	2.79756	0.00514895	0.0930653	ENSG00000008735	MAPK8IP2
9351	ENSG00000185475.11	2313.45	0.507995	0.194568	2.61088	0.00903092	0.134954	ENSG00000185475	TMEM179B
10872	ENSG00000250479.9	1598.6	0.507694	0.176221	2.88101	0.00396408	0.0785025	ENSG00000250479	CHCHD10
2731	ENSG00000111678.11	4785.02	0.506542	0.193538	2.61727	0.00886354	0.133681	ENSG00000111678	C12orf57
9911	ENSG00000197956.10	6635.39	0.506396	0.144545	3.50337	0.000459412	0.0203554	ENSG00000197956	S100A6
7855	ENSG00000168936.11	2593.14	0.506226	0.177202	2.85677	0.00427978	0.0823207	ENSG00000168936	TMEM129
10408	ENSG00000214253.9	2322.96	0.505034	0.16798	3.00652	0.00264258	0.0619158	ENSG00000214253	FIS1
9530	ENSG00000187838.17	1137.2	0.504922	0.193525	2.60908	0.0090786	0.135489	ENSG00000187838	PLSCR3
7495	ENSG00000166337.10	2070.16	0.503331	0.176362	2.85397	0.00431768	0.0824923	ENSG00000166337	TAF10
5029	ENSG00000137843.12	687.873	0.503313	0.190356	2.64407	0.00819161	0.127255	ENSG00000137843	PAK6
3380	ENSG00000119333.11	7681.12	0.503272	0.182462	2.75822	0.00581163	0.101034	ENSG00000119333	WDR34
4143	ENSG00000129946.10	2619.97	0.502911	0.19232	2.61497	0.00892347	0.134092	ENSG00000129946	SHC2
565	ENSG00000059915.17	1904.97	0.502172	0.182159	2.75677	0.00583746	0.101174	ENSG00000059915	PSD
293	ENSG00000023191.17	4768.59	0.502077	0.175298	2.86413	0.0041816	0.0811173	ENSG00000023191	RNH1
3818	ENSG00000125534.10	20541	0.500797	0.142315	3.51893	0.000433285	0.0195787	ENSG00000125534	PPDPF
10419	ENSG00000214530.9	28696	0.500739	0.153583	3.26037	0.00111266	0.0357906	ENSG00000214530	STARD10
10983	ENSG00000258947.7	3657.77	0.500317	0.169136	2.95807	0.0030957	0.0677898	ENSG00000258947	TUBB3
9448	ENSG00000186501.14	2546.26	0.499752	0.187515	2.66513	0.00769593	0.122393	ENSG00000186501	TMEM222
4159	ENSG00000130165.10	2022.31	0.499576	0.17496	2.85537	0.00429869	0.082406	ENSG00000130165	ELOF1
7720	ENSG00000167965.18	5146.96	0.49933	0.167529	2.98056	0.00287719	0.0651343	ENSG00000167965	MLST8
8361	ENSG00000173638.19	665.203	0.498767	0.185409	2.69009	0.00714334	0.116702	ENSG00000173638	SLC19A1
1587	ENSG00000100258.18	10193.4	0.498671	0.173502	2.87414	0.00405124	0.0798121	ENSG00000100258	LMF2
9779	ENSG00000196924.18	2732.07	0.498512	0.172531	2.8894	0.00385978	0.0777232	ENSG00000196924	FLNA
2194	ENSG00000105447.13	2083.87	0.497732	0.191385	2.60069	0.00930375	0.137945	ENSG00000105447	GRWD1
3024	ENSG00000115138.11	1665.37	0.497254	0.181664	2.73722	0.006196	0.105458	ENSG00000115138	POMC
9962	ENSG00000198258.11	1741.76	0.495388	0.16394	3.02176	0.00251306	0.0597585	ENSG00000198258	UBL5
9003	ENSG00000181885.18	7641.05	0.49497	0.169634	2.91786	0.0035244	0.0737702	ENSG00000181885	CLDN7
4290	ENSG00000131165.16	5519.53	0.494196	0.177761	2.78011	0.00543402	0.0968344	ENSG00000131165	CHMP1A
7893	ENSG00000169221.14	6516.57	0.493989	0.185831	2.65827	0.00785425	0.123531	ENSG00000169221	TBC1D10B
5469	ENSG00000142546.14	2305.59	0.493549	0.17075	2.89048	0.00384652	0.0777232	ENSG00000142546	NOSIP
1528	ENSG00000099977.14	2056.95	0.492259	0.164753	2.98786	0.00280936	0.0642372	ENSG00000099977	DDT
1350	ENSG00000090661.12	931.44	0.492107	0.177211	2.77696	0.005487	0.0976236	ENSG00000090661	CERS4
9804	ENSG00000197070.14	2020.38	0.49184	0.155003	3.1731	0.00150822	0.0439235	ENSG00000197070	ARRDC1
7169	ENSG00000164054.15	8035.61	0.490734	0.153647	3.1939	0.00140366	0.0417322	ENSG00000164054	SHISA5
3251	ENSG00000117362.13	10148.2	0.489442	0.178681	2.73919	0.00615904	0.10499	ENSG00000117362	APH1A
70	ENSG00000005448.17	1111.11	0.487998	0.185783	2.62671	0.00862142	0.131422	ENSG00000005448	WDR54
4216	ENSG00000130669.17	4713.04	0.487971	0.174533	2.79586	0.00517618	0.0933516	ENSG00000130669	PAK4
9063	ENSG00000182544.9	1395.34	0.487864	0.177345	2.75093	0.00594261	0.102684	ENSG00000182544	MFSD5
1798	ENSG00000101460.13	2084.41	0.48542	0.171664	2.82773	0.004688	0.0870436	ENSG00000101460	MAP1LC3A
1288	ENSG00000088992.18	1317.06	0.484257	0.165907	2.91884	0.00351332	0.0737702	ENSG00000088992	TESC
2143	ENSG00000105135.16	3975.55	0.484082	0.174722	2.77058	0.00559567	0.0984821	ENSG00000105135	ILVBL
2221	ENSG00000105655.19	4027.48	0.483995	0.162673	2.97526	0.00292741	0.0658783	ENSG00000105655	ISYNA1
4899	ENSG00000136840.19	851.094	0.483434	0.183962	2.62791	0.00859114	0.131404	ENSG00000136840	ST6GALNAC4
5930	ENSG00000147889.17	4739.14	0.48281	0.161868	2.98274	0.00285684	0.0648316	ENSG00000147889	CDKN2A
8807	ENSG00000178927.18	2975.71	0.481511	0.169229	2.84532	0.00443669	0.0840257	ENSG00000178927	CYBC1
8307	ENSG00000173113.7	3926.23	0.481246	0.162582	2.96002	0.00307622	0.0676219	ENSG00000173113	TRMT112
2237	ENSG00000105732.13	1118.92	0.48047	0.178935	2.68517	0.00724928	0.117422	ENSG00000105732	ZNF574
8013	ENSG00000170291.15	1877.14	0.480184	0.18158	2.64448	0.00818168	0.127255	ENSG00000170291	ELP5
7605	ENSG00000167118.11	2565.58	0.480018	0.178161	2.6943	0.00705365	0.115735	ENSG00000167118	URM1
10308	ENSG00000211450.10	1959.48	0.47949	0.174435	2.74882	0.00598111	0.103036	ENSG00000211450	SELENOH
4915	ENSG00000136908.18	3177.68	0.479424	0.167741	2.85813	0.00426149	0.0821076	ENSG00000136908	DPM2
9573	ENSG00000188486.3	4408.07	0.476994	0.174717	2.7301	0.00633143	0.107446	ENSG00000188486	H2AX
1994	ENSG00000103485.19	3975.73	0.476762	0.146974	3.24386	0.00117924	0.0369916	ENSG00000103485	QPRT
8124	ENSG00000171223.6	3596.77	0.476413	0.163966	2.90557	0.0036659	0.0756224	ENSG00000171223	JUNB
9190	ENSG00000183798.5	1093.38	0.475943	0.181038	2.62896	0.00856455	0.131404	ENSG00000183798	EMILIN3
1510	ENSG00000099834.19	2652.66	0.475649	0.155362	3.06156	0.00220185	0.0555931	ENSG00000099834	CDHR5
849	ENSG00000072195.15	2870.83	0.474344	0.176864	2.68196	0.0073192	0.117884	ENSG00000072195	SPEG
2648	ENSG00000110711.10	2937.87	0.473539	0.176094	2.68913	0.00716375	0.116868	ENSG00000110711	AIP
2230	ENSG00000105699.16	5182.73	0.473309	0.180098	2.62806	0.0085873	0.131404	ENSG00000105699	LSR
4197	ENSG00000130511.16	3357.69	0.473264	0.163262	2.8988	0.00374599	0.0764438	ENSG00000130511	SSBP4
4140	ENSG00000129925.11	11410.2	0.472958	0.158752	2.97922	0.00288984	0.0652909	ENSG00000129925	PGAP6
1999	ENSG00000103502.14	4131.92	0.472892	0.178213	2.65353	0.00796558	0.124765	ENSG00000103502	CDIPT
9898	ENSG00000197858.11	14116.9	0.471632	0.169899	2.77595	0.00550403	0.0976236	ENSG00000197858	GPAA1
8712	ENSG00000177666.17	2202.1	0.47088	0.178835	2.63305	0.00846222	0.130392	ENSG00000177666	PNPLA2
970	ENSG00000076826.10	6934.49	0.469435	0.165653	2.83385	0.00459909	0.0862765	ENSG00000076826	CAMSAP3
6882	ENSG00000162073.14	6109.16	0.466494	0.160632	2.90411	0.00368296	0.0757002	ENSG00000162073	PAQR4
4201	ENSG00000130522.6	19632.3	0.464802	0.164377	2.82766	0.00468892	0.0870436	ENSG00000130522	JUND
461	ENSG00000049759.19	845.603	0.462816	0.179284	2.58147	0.00983815	0.142166	ENSG00000049759	NEDD4L
6720	ENSG00000160113.5	3998.75	0.462606	0.163412	2.83092	0.00464138	0.0869266	ENSG00000160113	NR2F6
7804	ENSG00000168528.12	3630.81	0.462143	0.158732	2.91148	0.00359725	0.074341	ENSG00000168528	SERINC2
1925	ENSG00000102977.17	1987.97	0.460952	0.171313	2.69069	0.00713035	0.116657	ENSG00000102977	ACD
2836	ENSG00000112695.11	1592.04	0.459592	0.167447	2.7447	0.0060567	0.103867	ENSG00000112695	COX7A2
2377	ENSG00000107331.17	6395.33	0.459441	0.146576	3.13449	0.00172155	0.0471702	ENSG00000107331	ABCA2
1950	ENSG00000103145.11	1981	0.45879	0.176519	2.5991	0.00934678	0.138044	ENSG00000103145	HCFC1R1
8848	ENSG00000179314.14	2167.49	0.457945	0.170471	2.68635	0.00722363	0.11734	ENSG00000179314	WSCD1
1336	ENSG00000090266.13	2256.43	0.457912	0.158214	2.89426	0.00380051	0.0772887	ENSG00000090266	NDUFB2
6927	ENSG00000162545.6	4632.85	0.45731	0.154822	2.95378	0.00313903	0.0681726	ENSG00000162545	CAMK2N1
10475	ENSG00000219200.11	7147.58	0.455483	0.169792	2.68259	0.00730538	0.117884	ENSG00000219200	RNASEK
1228	ENSG00000087088.20	2886.74	0.453767	0.175991	2.57836	0.00992711	0.143089	ENSG00000087088	BAX
3164	ENSG00000116396.15	1124.63	0.453493	0.170267	2.66342	0.0077351	0.122598	ENSG00000116396	KCNC4
8231	ENSG00000172270.20	22500.8	0.453424	0.148545	3.05244	0.00226988	0.0568067	ENSG00000172270	BSG
8664	ENSG00000177106.16	1942.45	0.451315	0.172731	2.61283	0.00897969	0.134542	ENSG00000177106	EPS8L2
4157	ENSG00000130159.14	2595.86	0.449097	0.171854	2.61326	0.00896838	0.134542	ENSG00000130159	ECSIT
6790	ENSG00000160753.16	3427.5	0.448058	0.172528	2.59702	0.00940368	0.138525	ENSG00000160753	RUSC1
73	ENSG00000005486.17	8558.87	0.448036	0.159972	2.80071	0.00509899	0.0923088	ENSG00000005486	RHBDD2
9629	ENSG00000189159.16	1737.96	0.446994	0.158057	2.82806	0.00468311	0.0870436	ENSG00000189159	JPT1
6971	ENSG00000162882.15	1530.74	0.443972	0.166796	2.66177	0.00777318	0.122935	ENSG00000162882	HAAO
8974	ENSG00000181396.13	1646.79	0.443765	0.162845	2.72507	0.00642869	0.10845	ENSG00000181396	OGFOD3
5421	ENSG00000141741.12	1665.56	0.442153	0.1689	2.61783	0.008849	0.133639	ENSG00000141741	MIEN1
2430	ENSG00000107954.10	5529.92	0.439269	0.162494	2.70329	0.00686565	0.113964	ENSG00000107954	NEURL1
8794	ENSG00000178719.17	8345.68	0.437574	0.163425	2.67752	0.00741697	0.118954	ENSG00000178719	GRINA
733	ENSG00000068001.14	2728.66	0.437402	0.164746	2.655	0.00793074	0.12439	ENSG00000068001	HYAL2
8194	ENSG00000171858.18	5552.89	0.433818	0.160436	2.70399	0.00685131	0.113892	ENSG00000171858	RPS21
967	ENSG00000076604.15	5262.45	0.433775	0.165295	2.62425	0.00868404	0.132023	ENSG00000076604	TRAF4
3989	ENSG00000127585.12	3693.29	0.432275	0.166763	2.59216	0.00953758	0.139415	ENSG00000127585	FBXL16
3697	ENSG00000123933.17	3807.76	0.431845	0.163055	2.64846	0.00808585	0.126128	ENSG00000123933	MXD4
2611	ENSG00000110076.19	2322.31	0.430297	0.166382	2.5862	0.00970419	0.140766	ENSG00000110076	NRXN2
5764	ENSG00000145592.14	4875.77	0.426872	0.154041	2.77116	0.00558569	0.0984769	ENSG00000145592	RPL37
2227	ENSG00000105677.12	3191.7	0.425518	0.164055	2.59375	0.00949356	0.13895	ENSG00000105677	TMEM147
8793	ENSG00000178718.7	4118.16	0.424882	0.155834	2.7265	0.00640095	0.108142	ENSG00000178718	RPP25
1975	ENSG00000103266.11	4660.91	0.424288	0.159318	2.66316	0.00774109	0.122598	ENSG00000103266	STUB1
3667	ENSG00000123384.14	4426.53	0.423514	0.161363	2.6246	0.00867518	0.132023	ENSG00000123384	LRP1
7633	ENSG00000167363.14	1379.42	0.421337	0.162343	2.59535	0.00944953	0.138841	ENSG00000167363	FN3K
7880	ENSG00000169136.12	10740.6	0.418761	0.152853	2.73964	0.00615068	0.10499	ENSG00000169136	ATF5
10265	ENSG00000205476.9	2846.65	0.416885	0.15202	2.7423	0.00610109	0.104314	ENSG00000205476	CCDC85C
5261	ENSG00000140264.20	8620.14	0.414825	0.149584	2.77318	0.00555111	0.098153	ENSG00000140264	SERF2
4971	ENSG00000137309.20	12466.9	0.414222	0.160249	2.58487	0.00974162	0.14113	ENSG00000137309	HMGA1
7980	ENSG00000169976.7	7774.47	0.413654	0.159941	2.5863	0.00970134	0.140766	ENSG00000169976	SF3B5
161	ENSG00000008952.17	2948.53	0.41105	0.150641	2.72868	0.00635888	0.107751	ENSG00000008952	SEC62
8279	ENSG00000172809.13	3954.59	0.410353	0.154328	2.65896	0.00783815	0.123531	ENSG00000172809	RPL38
5305	ENSG00000140564.12	11808	0.409678	0.149695	2.73674	0.00620505	0.105458	ENSG00000140564	FURIN
8697	ENSG00000177542.11	2809.54	0.408136	0.157341	2.59395	0.00948792	0.13895	ENSG00000177542	SLC25A22
5433	ENSG00000141959.17	6232.81	0.403109	0.15107	2.66837	0.00762201	0.121557	ENSG00000141959	PFKL
7824	ENSG00000168763.16	5065.72	0.401994	0.155256	2.58923	0.00961905	0.140246	ENSG00000168763	CNNM3
2161	ENSG00000105254.12	6009.07	0.401152	0.144763	2.7711	0.00558673	0.0984769	ENSG00000105254	TBCB
10038	ENSG00000198736.11	4631.06	0.390216	0.14529	2.68578	0.00723614	0.117376	ENSG00000198736	MSRB1
6635	ENSG00000158856.18	10379	0.374087	0.14453	2.58831	0.00964481	0.140442	ENSG00000158856	DMTN
6105	ENSG00000150961.15	3992.5	-0.378491	0.146729	-2.57952	0.00989375	0.142789	ENSG00000150961	SEC24D
8189	ENSG00000171824.14	2862.74	-0.393351	0.151025	-2.60454	0.00919989	0.13694	ENSG00000171824	EXOSC10
1768	ENSG00000101290.14	2546.67	-0.402235	0.155251	-2.59086	0.00957352	0.139761	ENSG00000101290	CDS2
314	ENSG00000025800.14	3072.35	-0.411946	0.148979	-2.76512	0.00569017	0.0993592	ENSG00000025800	KPNA6
6471	ENSG00000156599.11	1925.27	-0.4158	0.157995	-2.63173	0.00849522	0.130723	ENSG00000156599	ZDHHC5
3695	ENSG00000123836.15	3392.79	-0.417815	0.159492	-2.61966	0.00880187	0.13328	ENSG00000123836	PFKFB2
5576	ENSG00000143515.18	2155.08	-0.41831	0.160933	-2.59927	0.00934219	0.138044	ENSG00000143515	ATP8B2
10001	ENSG00000198561.15	3062.74	-0.419781	0.148995	-2.81743	0.00484103	0.0889109	ENSG00000198561	CTNND1
5772	ENSG00000145730.20	4263.3	-0.420457	0.160487	-2.61988	0.00879604	0.13328	ENSG00000145730	PAM
4167	ENSG00000130226.17	4167.72	-0.423251	0.15743	-2.6885	0.00717743	0.116923	ENSG00000130226	DPP6
3688	ENSG00000123643.13	1313.89	-0.425166	0.163285	-2.60382	0.00921898	0.137045	ENSG00000123643	SLC36A1
8265	ENSG00000172661.19	1442.76	-0.429144	0.164343	-2.61127	0.0090206	0.134954	ENSG00000172661	WASHC2C
6555	ENSG00000157823.17	1305.89	-0.431366	0.164967	-2.61487	0.00892614	0.134092	ENSG00000157823	AP3S2
7399	ENSG00000165671.21	2636.66	-0.434674	0.161292	-2.69496	0.00703978	0.115674	ENSG00000165671	NSD1
3754	ENSG00000124571.18	1960.05	-0.435227	0.155344	-2.8017	0.00508345	0.0921741	ENSG00000124571	XPO5
10015	ENSG00000198663.17	2125.91	-0.437119	0.167973	-2.60232	0.00925953	0.137468	ENSG00000198663	C6orf89
7582	ENSG00000166938.13	1343.81	-0.450918	0.167106	-2.6984	0.00696747	0.114817	ENSG00000166938	DIS3L
1348	ENSG00000090615.15	2925.32	-0.453803	0.152457	-2.97659	0.00291471	0.0657224	ENSG00000090615	GOLGA3
2465	ENSG00000108389.9	1787.77	-0.455026	0.159524	-2.85239	0.00433913	0.0827633	ENSG00000108389	MTMR4
2013	ENSG00000103657.14	1849.73	-0.456328	0.164757	-2.7697	0.00561071	0.0985945	ENSG00000103657	HERC1
9367	ENSG00000185591.10	1595.1	-0.458262	0.165772	-2.76441	0.00570258	0.0993592	ENSG00000185591	SP1
1022	ENSG00000078699.22	4346.05	-0.458409	0.158137	-2.8988	0.00374592	0.0764438	ENSG00000078699	CBFA2T2
5298	ENSG00000140526.18	4339.79	-0.459051	0.148741	-3.08625	0.00202695	0.0522192	ENSG00000140526	ABHD2
473	ENSG00000050438.17	1709.58	-0.460773	0.174688	-2.6377	0.00834709	0.129142	ENSG00000050438	SLC4A8
8645	ENSG00000176953.12	2001.33	-0.461524	0.163533	-2.8222	0.00476948	0.0883091	ENSG00000176953	NFATC2IP
371	ENSG00000036828.17	6300.98	-0.462664	0.144335	-3.20549	0.00134831	0.0408834	ENSG00000036828	CASR
9266	ENSG00000184677.18	1423.56	-0.462737	0.171669	-2.69553	0.00702777	0.115643	ENSG00000184677	ZBTB40
6547	ENSG00000157657.14	1418.15	-0.464661	0.170353	-2.72764	0.00637894	0.10793	ENSG00000157657	ZNF618
3140	ENSG00000116147.17	1444.88	-0.466111	0.167056	-2.79015	0.00526828	0.0944769	ENSG00000116147	TNR
8138	ENSG00000171316.12	5949.04	-0.466315	0.143641	-3.2464	0.00116874	0.0368654	ENSG00000171316	CHD7
4280	ENSG00000131089.17	1869	-0.466913	0.164359	-2.84081	0.00449991	0.0846949	ENSG00000131089	ARHGEF9
11215	ENSG00000274211.6	1483.28	-0.473937	0.177341	-2.67246	0.00752965	0.120253	ENSG00000274211	SOCS7
2631	ENSG00000110395.7	724.705	-0.474733	0.183782	-2.58313	0.00979089	0.141663	ENSG00000110395	CBL
1108	ENSG00000082458.12	1013.23	-0.479131	0.17157	-2.79263	0.00522813	0.0940484	ENSG00000082458	DLG3
223	ENSG00000012817.16	993.534	-0.480385	0.178719	-2.68794	0.00718944	0.116952	ENSG00000012817	KDM5D
510	ENSG00000054793.14	8887.34	-0.481734	0.150767	-3.19523	0.00139719	0.0416488	ENSG00000054793	ATP9A
880	ENSG00000073417.15	1033.02	-0.489775	0.177637	-2.75717	0.00583042	0.101174	ENSG00000073417	PDE8A
4540	ENSG00000133812.16	766.633	-0.490534	0.186282	-2.63329	0.00845618	0.130392	ENSG00000133812	SBF2
3417	ENSG00000119682.17	1685.31	-0.494753	0.172545	-2.86738	0.00413881	0.0805617	ENSG00000119682	AREL1
3323	ENSG00000118263.15	1163.52	-0.497285	0.182765	-2.7209	0.00651049	0.109505	ENSG00000118263	KLF7
6832	ENSG00000161217.12	655.629	-0.511488	0.196211	-2.60682	0.00913865	0.136207	ENSG00000161217	PCYT1A
2391	ENSG00000107562.16	3988.05	-0.511624	0.178507	-2.86613	0.00415519	0.0807426	ENSG00000107562	CXCL12
4511	ENSG00000133401.16	691.864	-0.513095	0.191413	-2.68056	0.00734995	0.118212	ENSG00000133401	PDZD2
9542	ENSG00000188042.8	754.34	-0.515378	0.189942	-2.71334	0.00666092	0.11159	ENSG00000188042	ARL4C
7143	ENSG00000163945.18	509.374	-0.525462	0.197201	-2.6646	0.00770793	0.122413	ENSG00000163945	UVSSA
4726	ENSG00000135473.15	1521.64	-0.530805	0.17055	-3.11232	0.00185624	0.049734	ENSG00000135473	PAN2
7360	ENSG00000165406.16	2750.33	-0.530865	0.15091	-3.51776	0.000435214	0.0195881	ENSG00000165406	MARCHF8
2993	ENSG00000114770.17	783.515	-0.534158	0.178996	-2.98418	0.00284336	0.0648316	ENSG00000114770	ABCC5
8319	ENSG00000173214.7	453.832	-0.537754	0.202917	-2.65012	0.00804632	0.125856	ENSG00000173214	MFSD4B
9553	ENSG00000188211.9	917.298	-0.539548	0.202408	-2.66565	0.007684	0.122374	ENSG00000188211	NCR3LG1
846	ENSG00000072134.15	706.078	-0.540206	0.1863	-2.89965	0.00373577	0.0764438	ENSG00000072134	EPN2
9908	ENSG00000197943.10	1003.61	-0.544349	0.18513	-2.94036	0.0032783	0.0698085	ENSG00000197943	PLCG2
8906	ENSG00000180229.12	1181.98	-0.546503	0.171992	-3.17749	0.00148554	0.0433739	ENSG00000180229	HERC2P3
6191	ENSG00000152127.9	1111.22	-0.551883	0.21072	-2.61903	0.00881806	0.133348	ENSG00000152127	MGAT5
398	ENSG00000040633.13	919.69	-0.552879	0.183036	-3.02059	0.0025228	0.0597585	ENSG00000040633	PHF23
1295	ENSG00000089057.15	1532.6	-0.555803	0.166129	-3.34562	0.000820993	0.0295843	ENSG00000089057	SLC23A2
8372	ENSG00000173757.10	1068.05	-0.55659	0.169635	-3.28111	0.00103401	0.0340296	ENSG00000173757	STAT5B
5339	ENSG00000140992.19	2308.13	-0.560097	0.160516	-3.48936	0.000484172	0.0211706	ENSG00000140992	PDPK1
9084	ENSG00000182795.13	978.954	-0.564233	0.180353	-3.1285	0.00175702	0.0478639	ENSG00000182795	C1orf116
6203	ENSG00000152254.11	764.191	-0.581571	0.224051	-2.5957	0.00943971	0.138841	ENSG00000152254	G6PC2
4778	ENSG00000135905.19	392.196	-0.583564	0.216715	-2.69277	0.00708613	0.1161	ENSG00000135905	DOCK10
9249	ENSG00000184465.16	436.545	-0.585002	0.216527	-2.70175	0.00689751	0.114111	ENSG00000184465	WDR27
1152	ENSG00000084112.15	1585.01	-0.587029	0.179103	-3.27761	0.0010469	0.034256	ENSG00000084112	SSH1
8437	ENSG00000174485.16	559.512	-0.597591	0.192785	-3.09978	0.00193662	0.0509292	ENSG00000174485	DENND4A
7307	ENSG00000164961.16	827.825	-0.610915	0.193846	-3.15154	0.0016241	0.0455507	ENSG00000164961	WASHC5
983	ENSG00000077157.22	530.103	-0.632924	0.204342	-3.09738	0.00195238	0.0512253	ENSG00000077157	PPP1R12B
4006	ENSG00000127946.17	318.786	-0.643801	0.228404	-2.8187	0.0048219	0.0888462	ENSG00000127946	HIP1
4845	ENSG00000136383.7	362.008	-0.64725	0.241307	-2.68227	0.00731236	0.117884	ENSG00000136383	ALPK3
5257	ENSG00000140199.13	821.986	-0.65687	0.180336	-3.64247	0.000270036	0.0139518	ENSG00000140199	SLC12A6
9611	ENSG00000188933.16	631.097	-0.661764	0.201437	-3.28521	0.00101906	0.0339506	ENSG00000188933	USP32P1
3377	ENSG00000119321.9	832.197	-0.669183	0.177178	-3.77689	0.000158799	0.0104523	ENSG00000119321	FKBP15
9987	ENSG00000198466.12	492.021	-0.669778	0.213835	-3.13222	0.0017349	0.0473747	ENSG00000198466	ZNF587
5705	ENSG00000144791.10	609.065	-0.713623	0.197698	-3.60967	0.000306586	0.0154473	ENSG00000144791	LIMD1
10441	ENSG00000215158.9	178.749	-0.729686	0.27703	-2.63396	0.0084396	0.130392	ENSG00000215158	AC138409.2
10852	ENSG00000248905.10	177.275	-0.746858	0.276759	-2.69858	0.00696356	0.114817	ENSG00000248905	FMN1
4403	ENSG00000132464.13	181.793	-0.782482	0.273511	-2.86088	0.00422473	0.0816757	ENSG00000132464	ENAM
5367	ENSG00000141376.22	230.11	-0.813064	0.274685	-2.95999	0.00307649	0.0676219	ENSG00000141376	BCAS3
58	ENSG00000005156.12	843.067	-0.856973	0.201981	-4.24285	2.21e-05	0.00334587	ENSG00000005156	LIG3
11145	ENSG00000270149.5	613.041	-0.894893	0.265916	-3.36532	0.000764549	0.0279036	ENSG00000270149	AL591806.3
11116	ENSG00000268350.7	326.953	-1.19251	0.235644	-5.06065	4.18e-07	0.000226394	ENSG00000268350	FAM156A
11202	ENSG00000273590.4	174.258	-3.91948	0.385153	-10.1764	2.53e-24	2.88e-20	ENSG00000273590	SMIM11B

## Sheet: UpReg_withmiR125b_predicted bd
Supplemental Table 3. Differential Gene expression (Fold change) in EndoCBH1-MIR125B2-KO versus controls
Target.gene	Gene.stable.ID.version	baseMean	log2FoldChange	lfcSE	stat	pvalue	padj	Gene.stable.ID	Representative.transcript	Gene.name	X3P.seq.tags...5	Conserved.sites.total	Conserved.8mer.sites	Conserved.7mer.m8.sites	Conserved.7mer.A1.sites	Poorly.conserved.sites.total	Poorly.conserved.8mer.sites	Poorly.conserved.7mer.m8.sites	Poorly.conserved.7mer.A1.sites	X6mer.sites	Representative.miRNA	Cumulative.weighted.context...score	Total.context...score	Aggregate.PCT	Previous.TargetScan.publication.s.
KLF16	ENSG00000129911.9	1613.87	0.762318	0.181838	4.19228	2.76e-05	0.0036783	ENSG00000129911	ENST00000250916.4	Kruppel-like factor 16	5	2	0	1	1	0	0	0	0	0	hsa-miR-125b-5p	-0.31	-0.31	0.95	2007, 2009, 2011
SPTBN2	ENSG00000173898.14	5684.55	0.584691	0.18521	3.15691	0.00159451	0.0453918	ENSG00000173898	ENST00000529997.1	spectrin, beta, non-erythrocytic 2	910	2	1	1	0	0	0	0	0	2	hsa-miR-125a-5p	-0.04	-0.05	0.69
SSTR3	ENSG00000278195.2	6069.71	0.572578	0.155851	3.67387	0.000238903	0.0129944	ENSG00000278195	ENST00000328544.3	somatostatin receptor 3	5	2	2	0	0	1	0	1	0	2	hsa-miR-125b-5p	-0.68	-0.68	> 0.99	2011
CAMSAP3	ENSG00000076826.10	6934.49	0.469435	0.165653	2.83385	0.00459909	0.0862765	ENSG00000076826	ENST00000446248.2	calmodulin regulated spectrin-associated protein family, member 3	14	2	0	1	1	0	0	0	0	0	hsa-miR-125a-5p	-0.35	-0.35	0.64	2007, 2009, 2011
RASL10B	ENSG00000270885.2	231.432	1.11602	0.257749	4.32988	1.49e-05	0.0027177	ENSG00000270885	ENST00000268864.3	RAS-like, family 10, member B	1495	1	0	0	1	0	0	0	0	0	hsa-miR-125a-5p	-0.32	-0.33	0.8	2011
EMID1	ENSG00000186998.16	3573.2	1.0705	0.197723	5.41415	6.16e-08	4.6e-05	ENSG00000186998	ENST00000334018.6	EMI domain containing 1	845	1	0	1	0	0	0	0	0	0	hsa-miR-125a-5p	-0.35	-0.35	0.52	2005, 2007, 2009, 2011
ZFHX2	ENSG00000136367.14	817.788	0.859419	0.227507	3.77755	0.000158376	0.0104523	ENSG00000136367	ENST00000419474.3	zinc finger homeobox 2	7	1	0	1	0	0	0	0	0	0	hsa-miR-125a-5p	-0.02	-0.02	0.24
RNASEH2C	ENSG00000172922.11	3628.46	0.778867	0.154475	5.04201	4.61e-07	0.000228067	ENSG00000172922	ENST00000308418.4	ribonuclease H2, subunit C	1330	1	0	1	0	1	0	0	1	0	hsa-miR-125b-5p	-0.05	-0.13	< 0.1
SLC8A2	ENSG00000118160.14	737.441	0.762082	0.259153	2.94067	0.00327506	0.0698085	ENSG00000118160	ENST00000236877.6	solute carrier family 8 (sodium/calcium exchanger), member 2	5	1	1	0	0	0	0	0	0	1	hsa-miR-125a-5p	-0.03	-0.03	0.9	2005, 2007, 2009, 2011
FAM89B	ENSG00000176973.8	3515.35	0.753643	0.176537	4.26903	1.96e-05	0.00319368	ENSG00000176973	ENST00000449319.2	family with sequence similarity 89, member B	289	1	0	1	0	0	0	0	0	0	hsa-miR-125b-5p	-0.16	-0.16	0.44
MMP11	ENSG00000099953.10	251.477	0.740573	0.261888	2.82782	0.00468661	0.0870436	ENSG00000099953	ENST00000215743.3	matrix metallopeptidase 11 (stromelysin 3)	1719	1	0	1	0	2	0	2	0	0	hsa-miR-125a-5p	-0.06	-0.06	ORF	2007, 2011
GPR153	ENSG00000158292.7	5437.66	0.734731	0.157859	4.65436	3.25e-06	0.00102796	ENSG00000158292	ENST00000377893.2	G protein-coupled receptor 153	39	1	0	1	0	0	0	0	0	0	hsa-miR-125b-5p	-0.26	-0.26	0.41	2011
LRRC10B	ENSG00000204950.4	1191.71	0.729934	0.179132	4.07484	4.6e-05	0.00468143	ENSG00000204950	ENST00000378075.2	leucine rich repeat containing 10B	5	1	1	0	0	0	0	0	0	1	hsa-miR-125a-5p	-0.48	-0.48	0.96	2011
LFNG	ENSG00000106003.13	845.773	0.723207	0.19488	3.71103	0.000206416	0.0119921	ENSG00000106003	ENST00000402045.1	LFNG O-fucosylpeptide 3-beta-N-acetylglucosaminyltransferase	346	1	1	0	0	0	0	0	0	0	hsa-miR-125a-5p	-0.61	-0.63	0.96	2005, 2007, 2009, 2011
TLE3	ENSG00000140332.17	1008.59	0.718145	0.221676	3.23962	0.00119689	0.0373398	ENSG00000140332	ENST00000558939.1	transducin-like enhancer of split 3 (E(sp1) homolog, Drosophila)	520	1	1	0	0	0	0	0	0	1	hsa-miR-125a-5p	-0.13	-0.28	0.97	2009, 2011
NFIC	ENSG00000141905.19	880.375	0.713888	0.237081	3.01116	0.00260253	0.0612294	ENSG00000141905	ENST00000346156.5	nuclear factor I/C (CCAAT-binding transcription factor)	26	1	0	1	0	0	0	0	0	2	hsa-miR-125a-5p	-0.02	-0.02	0.36
UBTD1	ENSG00000165886.5	574.481	0.675203	0.225141	2.99902	0.00270852	0.0629427	ENSG00000165886	ENST00000370664.3	ubiquitin domain containing 1	10	1	0	1	0	0	0	0	0	2	hsa-miR-125b-5p	-0.34	-0.34	0.62	2005, 2007, 2009, 2011
MAP3K11	ENSG00000173327.8	5741.09	0.673282	0.182048	3.69837	0.000216988	0.0123663	ENSG00000173327	ENST00000309100.3	mitogen-activated protein kinase kinase kinase 11	339	1	1	0	0	0	0	0	0	0	hsa-miR-125a-5p	-0.43	-0.43	0.94	2005, 2007, 2009, 2011
TIMM17B	ENSG00000126768.12	10100.5	0.670073	0.194454	3.44592	0.000569113	0.0230499	ENSG00000126768	ENST00000465150.2	translocase of inner mitochondrial membrane 17 homolog B (yeast)	35084	1	0	1	0	0	0	0	0	0	hsa-miR-125b-5p	-0.26	-0.26	0.55	2009, 2011
TMEM198	ENSG00000188760.10	3875.14	0.649183	0.192898	3.36542	0.000764263	0.0279036	ENSG00000188760	ENST00000373883.3	transmembrane protein 198	80	1	0	1	0	0	0	0	0	0	hsa-miR-125a-5p	-0.18	-0.18	0.5	2007, 2009, 2011
BAK1	ENSG00000030110.13	1627.08	0.642195	0.188889	3.39985	0.00067423	0.0261138	ENSG00000030110	ENST00000442998.2	BCL2-antagonist/killer 1	15	1	1	0	0	2	0	1	1	1	hsa-miR-125b-5p	-0.73	-0.73	0.96	2005, 2007, 2009, 2011
FAM83F	ENSG00000133477.17	1477	0.6385	0.199129	3.20646	0.00134381	0.0408834	ENSG00000133477	ENST00000333407.6	family with sequence similarity 83, member F	5	1	1	0	0	1	0	1	0	1	hsa-miR-125a-5p	-0.05	-0.05	0.36	2009, 2011
SLC27A4	ENSG00000167114.13	4723.63	0.633837	0.190695	3.32383	0.000887902	0.0312054	ENSG00000167114	ENST00000300456.4	solute carrier family 27 (fatty acid transporter), member 4	523	1	0	1	0	2	1	0	1	1	hsa-miR-125b-5p	-0.23	-0.41	0.79	2005, 2007, 2011
LIMD2	ENSG00000136490.9	918.639	0.624089	0.205693	3.03408	0.0024127	0.0582064	ENSG00000136490	ENST00000259006.3	LIM domain containing 2	90	1	0	1	0	1	0	1	0	0	hsa-miR-125a-5p	-0.26	-0.34	0.84	2007, 2009, 2011
PET100	ENSG00000229833.10	742.089	0.607423	0.186165	3.26281	0.00110312	0.0355841	ENSG00000229833	ENST00000594797.1	PET100 homolog (S. cerevisiae)	5	1	0	1	0	0	0	0	0	0	hsa-miR-125a-5p	-0.1	-0.1	ORF
GLIS2	ENSG00000126603.9	4661.55	0.588337	0.155991	3.7716	0.000162201	0.01053	ENSG00000126603	ENST00000262366.3	GLIS family zinc finger 2	17	1	1	0	0	0	0	0	0	0	hsa-miR-125a-5p	-0.03	-0.03	< 0.1
TMED1	ENSG00000099203.7	1619.57	0.575528	0.191788	3.00086	0.0026922	0.0626913	ENSG00000099203	ENST00000214869.2	transmembrane emp24 protein transport domain containing 1	55	1	1	0	0	0	0	0	0	1	hsa-miR-125b-5p	-0.08	-0.35	0.77
GPC1	ENSG00000063660.9	4343.3	0.57279	0.168116	3.40712	0.000656531	0.0256025	ENSG00000063660	ENST00000264039.2	glypican 1	1687	1	0	0	1	1	0	1	0	3	hsa-miR-125a-5p	-0.21	-0.21	0.82
MEGF8	ENSG00000105429.13	3921.25	0.537405	0.186072	2.88816	0.00387504	0.0777232	ENSG00000105429	ENST00000334370.4	multiple EGF-like-domains 8	28	1	0	1	0	0	0	0	0	2	hsa-miR-125b-5p	-0.21	-0.21	0.65	2007, 2009, 2011
MAPK8IP2	ENSG00000008735.14	6906.32	0.508103	0.181623	2.79756	0.00514895	0.0930653	ENSG00000008735	ENST00000399908.2	mitogen-activated protein kinase 8 interacting protein 2	88	1	0	1	0	0	0	0	0	0	hsa-miR-125a-5p	-0.14	-0.14	0.48
HSPG2	ENSG00000142798.20	457.097	1.36518	0.216576	6.30345	2.91e-10	1.01e-06	ENSG00000142798	ENST00000374695.3	heparan sulfate proteoglycan 2	616	0	0	0	0	1	0	1	0	0	hsa-miR-125a-5p	-0.02	-0.02	< 0.1
GJC2	ENSG00000198835.4	382.503	1.31776	0.243754	5.40611	6.44e-08	4.6e-05	ENSG00000198835	ENST00000366714.2	gap junction protein, gamma 2, 47kDa	10	0	0	0	0	1	1	0	0	1	hsa-miR-125b-5p	-0.23	-0.23	< 0.1
IGFALS	ENSG00000099769.6	676.618	1.19036	0.221474	5.3747	7.67e-08	4.6e-05	ENSG00000099769	ENST00000215539.3	insulin-like growth factor binding protein, acid labile subunit	8	0	0	0	0	1	0	1	0	0	hsa-miR-125a-5p	-0.13	-0.13	< 0.1
CEBPA	ENSG00000245848.3	1084.23	1.00545	0.183119	5.49069	4e-08	3.51e-05	ENSG00000245848	ENST00000498907.2	CCAAT/enhancer binding protein (C/EBP), alpha	12449	0	0	0	0	1	1	0	0	0	hsa-miR-125a-5p	-0.08	-0.08	< 0.1
SLC16A3	ENSG00000141526.17	864.033	0.930424	0.184172	5.05192	4.37e-07	0.000226394	ENSG00000141526	ENST00000581287.1	solute carrier family 16 (monocarboxylate transporter), member 3	16333	0	0	0	0	4	0	4	0	1	hsa-miR-125a-5p	0	-0.1	< 0.1
IBA57	ENSG00000181873.13	319.182	0.912659	0.289516	3.15236	0.00161956	0.045544	ENSG00000181873	ENST00000366711.3	IBA57, iron-sulfur cluster assembly homolog (S. cerevisiae)	66	0	0	0	0	3	1	2	0	4	hsa-miR-125b-5p	-0.21	-0.45	0.11
WNK2	ENSG00000165238.16	209.809	0.907097	0.286442	3.16678	0.00154139	0.0446611	ENSG00000165238	ENST00000395475.2	WNK lysine deficient protein kinase 2	134	0	0	0	0	3	0	3	0	0	hsa-miR-125b-5p	-0.09	-0.09	< 0.1
TOR4A	ENSG00000198113.3	894.906	0.870386	0.181446	4.79694	1.61e-06	0.000611498	ENSG00000198113	ENST00000357503.2	torsin family 4, member A	222	0	0	0	0	1	0	1	0	0	hsa-miR-125b-5p	-0.18	-0.18	< 0.1
SLC18A3	ENSG00000187714.7	5252.56	0.863852	0.147035	5.87513	4.23e-09	6.01e-06	ENSG00000187714	ENST00000374115.3	solute carrier family 18 (vesicular acetylcholine transporter), member 3	5	0	0	0	0	1	0	1	0	0	hsa-miR-125b-5p	-0.03	-0.03	0.11	2011
HOMER1	ENSG00000152413.15	264.996	0.862915	0.26001	3.31878	0.000904109	0.03158	ENSG00000152413	ENST00000508576.1	homer homolog 1 (Drosophila)	394	0	0	0	0	1	0	0	1	0	hsa-miR-125b-5p	-0.15	-0.17	< 0.1
FAM131C	ENSG00000185519.9	725.077	0.849333	0.187837	4.52165	6.14e-06	0.00162496	ENSG00000185519	ENST00000375662.4	family with sequence similarity 131, member C	5	0	0	0	0	1	1	0	0	0	hsa-miR-125a-5p	-0.2	-0.2	< 0.1
COL18A1	ENSG00000182871.16	727.947	0.846893	0.22795	3.71526	0.000202995	0.011915	ENSG00000182871	ENST00000400337.2	collagen, type XVIII, alpha 1	1051	0	0	0	0	1	0	1	0	0	hsa-miR-125b-5p	-0.09	-0.22	< 0.1
NLE1	ENSG00000073536.18	804.343	0.825455	0.182405	4.5254	6.03e-06	0.00162496	ENSG00000073536	ENST00000586869.1	notchless homolog 1 (Drosophila)	526	0	0	0	0	2	0	2	0	0	hsa-miR-125a-5p	0	-0.23	< 0.1
VWA1	ENSG00000179403.12	9968.02	0.82243	0.152939	5.3775	7.55e-08	4.6e-05	ENSG00000179403	ENST00000338660.5	von Willebrand factor A domain containing 1	145	0	0	0	0	1	0	0	1	0	hsa-miR-125a-5p	-0.12	-0.12	< 0.1
NUDT18	ENSG00000275074.2	389.669	0.809688	0.225217	3.59515	0.000324204	0.0159126	ENSG00000275074	ENST00000521807.2	nudix (nucleoside diphosphate linked moiety X)-type motif 18	40	0	0	0	0	3	0	0	3	0	hsa-miR-125b-5p	-0.41	-0.41	< 0.1
SSTR5	ENSG00000162009.8	493.82	0.808048	0.206356	3.91579	9.01e-05	0.00742985	ENSG00000162009	ENST00000397547.2	somatostatin receptor 5	5	0	0	0	0	2	1	1	0	1	hsa-miR-125a-5p	-0.09	-0.09	< 0.1
PDLIM4	ENSG00000131435.13	286.551	0.804889	0.237311	3.39171	0.000694589	0.0263643	ENSG00000131435	ENST00000379018.3	PDZ and LIM domain 4	417	0	0	0	0	1	0	0	1	0	hsa-miR-125a-5p	-0.02	-0.12	< 0.1
PTGES2	ENSG00000148334.15	3548.9	0.800758	0.161316	4.9639	6.91e-07	0.00031469	ENSG00000148334	ENST00000338961.6	prostaglandin E synthase 2	250	0	0	0	0	1	1	0	0	0	hsa-miR-125a-5p	-0.24	-0.24	< 0.1
PACSIN3	ENSG00000165912.16	1021.32	0.793302	0.214961	3.69045	0.000223858	0.0124954	ENSG00000165912	ENST00000298838.6	protein kinase C and casein kinase substrate in neurons 3	55	0	0	0	0	1	0	1	0	1	hsa-miR-125b-5p	-0.07	-0.07	< 0.1
CTU1	ENSG00000142544.7	559.37	0.791532	0.252252	3.13787	0.00170182	0.0469217	ENSG00000142544	ENST00000421832.2	cytosolic thiouridylase subunit 1	170	0	0	0	0	4	2	1	1	0	hsa-miR-125a-5p	-0.38	-0.4	< 0.1
THEM6	ENSG00000130193.8	3640.14	0.784901	0.175545	4.47122	7.78e-06	0.00180053	ENSG00000130193	ENST00000336138.3	thioesterase superfamily member 6	1500	0	0	0	0	1	0	1	0	0	hsa-miR-125a-5p	-0.13	-0.13	< 0.1
CD151	ENSG00000177697.19	6378.26	0.783415	0.187595	4.1761	2.97e-05	0.00376861	ENSG00000177697	ENST00000322008.4	CD151 molecule (Raph blood group)	13919	0	0	0	0	1	0	1	0	0	hsa-miR-125a-5p	0	-0.08	< 0.1
C2CD4C	ENSG00000183186.8	1129.42	0.780163	0.186155	4.19094	2.78e-05	0.0036783	ENSG00000183186	ENST00000332235.6	C2 calcium-dependent domain containing 4C	70	0	0	0	0	1	0	1	0	0	hsa-miR-125a-5p	-0.18	-0.18	< 0.1
AMIGO3	ENSG00000176020.9	570.434	0.778361	0.264249	2.94556	0.00322373	0.0692615	ENSG00000176020	ENST00000320431.7	adhesion molecule with Ig-like domain 3	24	0	0	0	0	1	0	1	0	0	hsa-miR-125a-5p	-0.02	-0.02	< 0.1
MESP1	ENSG00000166823.5	687.674	0.778172	0.192837	4.03538	5.45e-05	0.00530561	ENSG00000166823	ENST00000300057.4	mesoderm posterior 1 homolog (mouse)	303	0	0	0	0	1	0	0	1	0	hsa-miR-125b-5p	0	-0.1	< 0.1
NTNG2	ENSG00000196358.11	725.434	0.775663	0.195605	3.96545	7.33e-05	0.00664936	ENSG00000196358	ENST00000393229.3	netrin G2	15	0	0	0	0	1	1	0	0	0	hsa-miR-125a-5p	-0.08	-0.26	< 0.1
CACFD1	ENSG00000160325.14	10937.9	0.775589	0.172573	4.49426	6.98e-06	0.00172815	ENSG00000160325	ENST00000291722.7	calcium channel flower domain containing 1	1315	0	0	0	0	1	1	0	0	1	hsa-miR-125b-5p	-0.18	-0.18	< 0.1
DNLZ	ENSG00000213221.5	388.364	0.770407	0.234404	3.28666	0.00101382	0.0339506	ENSG00000213221	ENST00000371739.3	DNL-type zinc finger	373	0	0	0	0	1	0	1	0	0	hsa-miR-125a-5p	0	-0.02	< 0.1
DGCR6L	ENSG00000128185.10	3847.37	0.761947	0.17517	4.34977	1.36e-05	0.00265088	ENSG00000128185	ENST00000248879.3	DiGeorge syndrome critical region gene 6-like	18	0	0	0	0	1	0	1	0	2	hsa-miR-125b-5p	-0.03	-0.12	< 0.1
SPOCK2	ENSG00000107742.13	323.029	0.736863	0.246377	2.99079	0.00278258	0.0640106	ENSG00000107742	ENST00000373109.2	sparc/osteonectin, cwcv and kazal-like domains proteoglycan (testican) 2	31	0	0	0	0	1	0	0	1	0	hsa-miR-125a-5p	0	-0.03	< 0.1
HPS6	ENSG00000166189.8	1534.42	0.733237	0.186423	3.9332	8.38e-05	0.00723106	ENSG00000166189	ENST00000299238.5	Hermansky-Pudlak syndrome 6	2076	0	0	0	0	2	0	1	1	0	hsa-miR-125a-5p	-0.41	-0.41	< 0.1
KNDC1	ENSG00000171798.18	691.636	0.728828	0.21182	3.44078	0.000580034	0.0233387	ENSG00000171798	ENST00000304613.3	kinase non-catalytic C-lobe domain (KIND) containing 1	5	0	0	0	0	1	0	1	0	0	hsa-miR-125a-5p	-0.02	-0.02	< 0.1
PYCR1	ENSG00000183010.17	5670.75	0.726691	0.155246	4.68091	2.86e-06	0.000929215	ENSG00000183010	ENST00000329875.8	pyrroline-5-carboxylate reductase 1	157	0	0	0	0	1	0	0	1	4	hsa-miR-125b-5p	-0.04	-0.05	< 0.1
RAC3	ENSG00000169750.9	1889.34	0.719185	0.184672	3.89439	9.84e-05	0.00773106	ENSG00000169750	ENST00000306897.4	ras-related C3 botulinum toxin substrate 3 (rho family, small GTP binding protein Rac3)	16	0	0	0	0	1	0	1	0	0	hsa-miR-125a-5p	-0.12	-0.12	< 0.1
NDUFA11	ENSG00000174886.14	6251.15	0.715367	0.17922	3.99157	6.56e-05	0.0061264	ENSG00000174886	ENST00000592634.1	NADH dehydrogenase (ubiquinone) 1 alpha subcomplex, 11, 14.7kDa	32826	0	0	0	0	2	1	1	0	1	hsa-miR-125b-5p	-0.34	-0.34	< 0.1
MFAP2	ENSG00000117122.14	657.382	0.714496	0.1871	3.8188	0.000134102	0.00966471	ENSG00000117122	ENST00000375534.3	microfibrillar-associated protein 2	10	0	0	0	0	1	0	0	1	0	hsa-miR-125a-5p	-0.09	-0.19	< 0.1
MMP15	ENSG00000102996.5	4270.51	0.703211	0.166677	4.219	2.45e-05	0.00340758	ENSG00000102996	ENST00000219271.3	matrix metallopeptidase 15 (membrane-inserted)	605	0	0	0	0	2	0	2	0	0	hsa-miR-125b-5p	-0.07	-0.07	< 0.1
DERL3	ENSG00000099958.15	792.844	0.701471	0.179871	3.89985	9.63e-05	0.00766223	ENSG00000099958	ENST00000404056.1	derlin 3	129	0	0	0	0	1	0	1	0	0	hsa-miR-125a-5p	-0.03	-0.12	< 0.1
SLC25A10	ENSG00000183048.12	4075.15	0.693751	0.174239	3.9816	6.85e-05	0.00628607	ENSG00000183048	ENST00000571730.1	Mitochondrial dicarboxylate carrier; Uncharacterized protein; cDNA FLJ60124, highly similar to Mitochondrial dicarboxylate carrier	2354	0	0	0	0	3	0	2	1	0	hsa-miR-125b-5p	-0.09	-0.12	< 0.1
TBL3	ENSG00000183751.15	2283.28	0.682186	0.220006	3.10077	0.0019302	0.0508778	ENSG00000183751	ENST00000568546.1	transducin (beta)-like 3	57	0	0	0	0	3	0	0	3	1	hsa-miR-125b-5p	-0.03	-0.11	< 0.1
TCIRG1	ENSG00000110719.10	408.548	0.677747	0.210382	3.2215	0.00127522	0.0392459	ENSG00000110719	ENST00000265686.3	T-cell, immune regulator 1, ATPase, H+ transporting, lysosomal V0 subunit A3	2756	0	0	0	0	1	0	1	0	3	hsa-miR-125a-5p	0	-0.02	< 0.1
LRP3	ENSG00000130881.14	5276.9	0.675251	0.17049	3.96065	7.47e-05	0.00664936	ENSG00000130881	ENST00000253193.7	low density lipoprotein receptor-related protein 3	135	0	0	0	0	2	0	1	1	0	hsa-miR-125b-5p	-0.01	-0.14	< 0.1
ZNF581	ENSG00000171425.10	673.927	0.671152	0.213237	3.14744	0.00164706	0.0459683	ENSG00000171425	ENST00000587252.1	zinc finger protein 581	1889	0	0	0	0	1	0	1	0	1	hsa-miR-125a-5p	-0.03	-0.07	< 0.1
NAT8L	ENSG00000185818.8	937.798	0.670127	0.212442	3.1544	0.0016083	0.0454435	ENSG00000185818	ENST00000331662.3	N-acetyltransferase 8-like (GCN5-related, putative)	220	0	0	0	0	1	0	1	0	0	hsa-miR-125a-5p	-0.02	-0.02	0.17
CISD3	ENSG00000277972.2	1384.91	0.66711	0.176109	3.78805	0.000151832	0.0101701	ENSG00000277972	ENST00000439660.2	CDGSH iron sulfur domain 3	3508	0	0	0	0	1	0	1	0	1	hsa-miR-125a-5p	0	-0.11	< 0.1
SIPA1	ENSG00000213445.10	1213.34	0.666957	0.212693	3.13577	0.00171404	0.0471445	ENSG00000213445	ENST00000534313.1	signal-induced proliferation-associated 1	424	0	0	0	0	1	0	0	1	0	hsa-miR-125a-5p	-0.22	-0.22	< 0.1
CENPB	ENSG00000125817.8	13040.1	0.665952	0.193184	3.44724	0.000566349	0.0230322	ENSG00000125817	ENST00000379751.4	centromere protein B, 80kDa	4684	0	0	0	0	1	0	1	0	0	hsa-miR-125a-5p	-0.02	-0.02	< 0.1
SPNS2	ENSG00000183018.9	414.226	0.66189	0.217166	3.04785	0.00230487	0.0573048	ENSG00000183018	ENST00000329078.3	spinster homolog 2 (Drosophila)	7	0	0	0	0	2	0	2	0	0	hsa-miR-125a-5p	-0.02	-0.04	0.16
MPND	ENSG00000008382.16	1016.08	0.658942	0.201689	3.26712	0.00108649	0.0353481	ENSG00000008382	ENST00000262966.8	MPN domain containing	633	0	0	0	0	1	0	1	0	0	hsa-miR-125a-5p	0	-0.15	< 0.1
IGFBP4	ENSG00000141753.7	625.808	0.657967	0.221894	2.96524	0.00302452	0.0670042	ENSG00000141753	ENST00000269593.4	insulin-like growth factor binding protein 4	4053	0	0	0	0	2	0	1	1	1	hsa-miR-125a-5p	-0.01	-0.18	< 0.1
NINJ1	ENSG00000131669.10	352.991	0.654821	0.228675	2.86354	0.00418935	0.0811294	ENSG00000131669	ENST00000375446.4	ninjurin 1	1216	0	0	0	0	1	0	1	0	0	hsa-miR-125a-5p	0	-0.03	< 0.1
METRN	ENSG00000103260.9	770.57	0.650563	0.213233	3.05096	0.00228115	0.0569636	ENSG00000103260	ENST00000568223.2	meteorin, glial cell differentiation regulator	57	0	0	0	0	1	0	1	0	0	hsa-miR-125a-5p	-0.01	-0.16	< 0.1
RNF208	ENSG00000212864.3	768.576	0.648821	0.205378	3.15915	0.00158229	0.0452703	ENSG00000212864	ENST00000392827.1	ring finger protein 208	30	0	0	0	0	1	0	0	1	0	hsa-miR-125a-5p	-0.12	-0.12	< 0.1
BOK	ENSG00000176720.6	1453.87	0.641176	0.216077	2.96734	0.00300384	0.0667338	ENSG00000176720	ENST00000318407.3	BCL2-related ovarian killer	588	0	0	0	0	1	0	1	0	1	hsa-miR-125a-5p	-0.09	-0.09	< 0.1
ACADS	ENSG00000122971.9	753.1	0.639024	0.214243	2.98271	0.0028571	0.0648316	ENSG00000122971	ENST00000242592.4	acyl-CoA dehydrogenase, C-2 to C-3 short chain	438	0	0	0	0	1	1	0	0	0	hsa-miR-125a-5p	-0.28	-0.28	< 0.1
ZNF593	ENSG00000142684.9	727.539	0.633069	0.191334	3.30871	0.000937253	0.0323773	ENSG00000142684	ENST00000270812.5	zinc finger protein 593	3221	0	0	0	0	1	0	1	0	1	hsa-miR-125a-5p	0	-0.25	< 0.1
JMJD4	ENSG00000081692.12	1181.55	0.628877	0.201539	3.12037	0.00180622	0.0487379	ENSG00000081692	ENST00000366758.3	jumonji domain containing 4	1570	0	0	0	0	2	0	0	2	0	hsa-miR-125a-5p	-0.21	-0.25	< 0.1
RABAC1	ENSG00000105404.11	4443.82	0.627731	0.198548	3.16161	0.00156902	0.0452315	ENSG00000105404	ENST00000601891.1	Rab acceptor 1 (prenylated)	2218	0	0	0	0	1	1	0	0	0	hsa-miR-125a-5p	0	-0.14	< 0.1
DLGAP3	ENSG00000116544.12	1634.2	0.627011	0.170406	3.6795	0.000233688	0.0127933	ENSG00000116544	ENST00000373347.1	discs, large (Drosophila) homolog-associated protein 3	8	0	0	0	0	3	0	1	2	0	hsa-miR-125a-5p	0	-0.14	< 0.1
NAA38	ENSG00000183011.13	1956.01	0.619758	0.179016	3.46203	0.00053611	0.0226099	ENSG00000183011	ENST00000249299.2	N(alpha)-acetyltransferase 38, NatC auxiliary subunit	458	0	0	0	0	1	0	0	1	1	hsa-miR-125a-5p	0	-0.07	< 0.1	2011
ATG2A	ENSG00000110046.13	4799.7	0.619397	0.190466	3.25201	0.00114592	0.0365507	ENSG00000110046	ENST00000421419.2	autophagy related 2A	3795	0	0	0	0	2	1	0	1	2	hsa-miR-125a-5p	0	-0.04	< 0.1
SAPCD2	ENSG00000186193.9	1408.25	0.618409	0.16767	3.68825	0.000225802	0.0125425	ENSG00000186193	ENST00000409687.3	suppressor APC domain containing 2	22	0	0	0	0	1	0	0	1	0	hsa-miR-125b-5p	-0.09	-0.09	< 0.1
TPRA1	ENSG00000163870.16	1683.78	0.617133	0.186535	3.3084	0.000938307	0.0323773	ENSG00000163870	ENST00000296210.7	transmembrane protein, adipocyte asscociated 1	44	0	0	0	0	2	0	1	1	0	hsa-miR-125a-5p	-0.01	-0.1	< 0.1
ZDHHC24	ENSG00000174165.8	1521.23	0.614102	0.179725	3.41689	0.000633407	0.0249571	ENSG00000174165	ENST00000310442.3	zinc finger, DHHC-type containing 24	304	0	0	0	0	1	0	1	0	0	hsa-miR-125a-5p	-0.02	-0.04	< 0.1
ZNF81	ENSG00000197779.14	436.636	0.612643	0.215079	2.84846	0.00439311	0.0836066	ENSG00000197779	ENST00000338637.7	zinc finger protein 81	10	0	0	0	0	2	1	1	0	0	hsa-miR-125a-5p	-0.13	-0.13	< 0.1
PCBP4	ENSG00000090097.21	4688.62	0.59996	0.156096	3.84352	0.00012128	0.00908563	ENSG00000090097	ENST00000471622.1	poly(rC) binding protein 4	353	0	0	0	0	1	0	0	1	1	hsa-miR-125b-5p	-0.05	-0.05	< 0.1
LYPLA2	ENSG00000011009.11	4416.63	0.599929	0.188451	3.18347	0.00145521	0.0427932	ENSG00000011009	ENST00000374505.2	lysophospholipase II	21	0	0	0	0	1	0	1	0	0	hsa-miR-125b-5p	-0.14	-0.18	0.16	2005, 2007, 2009, 2011
TMEM115	ENSG00000126062.4	3949.15	0.59555	0.175338	3.39658	0.000682348	0.0261487	ENSG00000126062	ENST00000266025.3	transmembrane protein 115	1346	0	0	0	0	1	1	0	0	0	hsa-miR-125a-5p	0	-0.1	< 0.1
YIF1B	ENSG00000167645.17	1756.54	0.594848	0.180713	3.29167	0.00099595	0.0334539	ENSG00000167645	ENST00000337679.8	Yip1 interacting factor homolog B (S. cerevisiae)	3087	0	0	0	0	1	0	1	0	1	hsa-miR-125a-5p	0	-0.02	< 0.1
TM7SF2	ENSG00000149809.16	6023.45	0.593721	0.175127	3.39023	0.000698336	0.0263763	ENSG00000149809	ENST00000540748.1	transmembrane 7 superfamily member 2	667	0	0	0	0	1	0	0	1	0	hsa-miR-125b-5p	-0.02	-0.12	< 0.1
AKR7A2	ENSG00000053371.12	4641.91	0.5908	0.177	3.33786	0.000844274	0.0301372	ENSG00000053371	ENST00000235835.3	aldo-keto reductase family 7, member A2 (aflatoxin aldehyde reductase)	1134	0	0	0	0	3	0	0	3	0	hsa-miR-125b-5p	0	-0.45	< 0.1
SIGIRR	ENSG00000185187.13	2553.36	0.587462	0.178307	3.29467	0.000985382	0.0332954	ENSG00000185187	ENST00000531205.1	single immunoglobulin and toll-interleukin 1 receptor (TIR) domain	80	0	0	0	0	1	0	1	0	0	hsa-miR-125a-5p	-0.15	-0.16	< 0.1
SDHAF1	ENSG00000205138.4	1179.88	0.583799	0.200378	2.91349	0.00357418	0.0742686	ENSG00000205138	ENST00000378887.2	succinate dehydrogenase complex assembly factor 1	2317	0	0	0	0	1	0	1	0	1	hsa-miR-125b-5p	-0.01	-0.11	< 0.1
RCOR2	ENSG00000167771.6	2096.51	0.583535	0.162633	3.58805	0.000333166	0.0160074	ENSG00000167771	ENST00000301459.4	REST corepressor 2	5	0	0	0	0	1	0	1	0	1	hsa-miR-125b-5p	-0.04	-0.04	< 0.1
RNF187	ENSG00000168159.13	4570.3	0.582724	0.168703	3.45413	0.000552071	0.0227909	ENSG00000168159	ENST00000305943.7	ring finger protein 187	13589	0	0	0	0	1	0	0	1	1	hsa-miR-125a-5p	-0.11	-0.13	< 0.1
SBF1	ENSG00000100241.21	11644.8	0.581398	0.188732	3.08055	0.00206616	0.053036	ENSG00000100241	ENST00000380817.3	SET binding factor 1	2045	0	0	0	0	1	0	1	0	0	hsa-miR-125a-5p	0	-0.02	< 0.1
CAPN15	ENSG00000103326.12	3427.2	0.575552	0.189929	3.03035	0.00244269	0.0588054	ENSG00000103326	ENST00000219611.2	calpain 15	5	0	0	0	0	2	0	1	1	0	hsa-miR-125a-5p	-0.04	-0.04	< 0.1
SRM	ENSG00000116649.10	2811.37	0.573406	0.193568	2.96229	0.00305359	0.067386	ENSG00000116649	ENST00000376957.2	spermidine synthase	46	0	0	0	0	2	1	0	1	1	hsa-miR-125b-5p	-0.03	-0.3	< 0.1
DOK1	ENSG00000115325.13	1019.75	0.572227	0.20385	2.8071	0.00499901	0.091224	ENSG00000115325	ENST00000340004.6	docking protein 1, 62kDa (downstream of tyrosine kinase 1)	331	0	0	0	0	2	2	0	0	0	hsa-miR-125b-5p	-0.34	-0.34	< 0.1
CHCHD5	ENSG00000125611.15	864.828	0.56901	0.197267	2.88447	0.00392069	0.0781736	ENSG00000125611	ENST00000409719.1	coiled-coil-helix-coiled-coil-helix domain containing 5	1577	0	0	0	0	1	0	1	0	0	hsa-miR-125b-5p	-0.09	-0.09	< 0.1
EPN1	ENSG00000063245.15	7908.34	0.567771	0.182876	3.10467	0.00190493	0.0506035	ENSG00000063245	ENST00000270460.6	epsin 1	5464	0	0	0	0	1	0	0	1	0	hsa-miR-125a-5p	0	-0.11	< 0.1
THOC6	ENSG00000131652.14	1969.42	0.562515	0.197726	2.84492	0.00444222	0.0840257	ENSG00000131652	ENST00000574549.1	THO complex 6 homolog (Drosophila)	1143	0	0	0	0	1	0	1	0	0	hsa-miR-125a-5p	-0.38	-0.38	< 0.1
COMTD1	ENSG00000165644.11	1366.17	0.560796	0.180648	3.10436	0.00190693	0.0506035	ENSG00000165644	ENST00000372538.3	catechol-O-methyltransferase domain containing 1	138	0	0	0	0	1	0	1	0	0	hsa-miR-125a-5p	0	-0.07	< 0.1
R3HDM4	ENSG00000198858.10	3146.21	0.560627	0.186272	3.00972	0.00261488	0.0613932	ENSG00000198858	ENST00000361574.5	R3H domain containing 4	123	0	0	0	0	1	0	1	0	0	hsa-miR-125b-5p	-0.03	-0.03	< 0.1
C9orf16	ENSG00000171159.5	4788.67	0.557038	0.183586	3.03421	0.00241169	0.0582064	ENSG00000171159	ENST00000372994.1	chromosome 9 open reading frame 16	274	0	0	0	0	1	0	0	1	0	hsa-miR-125b-5p	-0.15	-0.15	< 0.1
ALDH4A1	ENSG00000159423.17	1233.98	0.554963	0.179276	3.09557	0.00196432	0.0514201	ENSG00000159423	ENST00000375341.3	aldehyde dehydrogenase 4 family, member A1	520	0	0	0	0	2	1	1	0	0	hsa-miR-125a-5p	-0.18	-0.18	< 0.1
SLC35C2	ENSG00000080189.15	8429.1	0.54499	0.173028	3.14972	0.00163429	0.0457241	ENSG00000080189	ENST00000372227.1	solute carrier family 35 (GDP-fucose transporter), member C2	910	0	0	0	0	1	0	1	0	0	hsa-miR-125b-5p	0	-0.11	0.17
AGTRAP	ENSG00000177674.16	1035.96	0.544205	0.189561	2.87087	0.0040935	0.0800904	ENSG00000177674	ENST00000376627.2	angiotensin II receptor-associated protein	3213	0	0	0	0	3	2	0	1	1	hsa-miR-125b-5p	-0.43	-0.6	< 0.1
GLYCTK	ENSG00000168237.18	3183.36	0.543039	0.192938	2.81459	0.004884	0.0895557	ENSG00000168237	ENST00000354773.4	glycerate kinase	3833	0	0	0	0	2	0	2	0	0	hsa-miR-125b-5p	-0.25	-0.25	< 0.1
RPL28	ENSG00000108107.15	20249.8	0.539713	0.154626	3.49045	0.00048221	0.0211706	ENSG00000108107	ENST00000560583.1	ribosomal protein L28	5407	0	0	0	0	2	0	2	0	2	hsa-miR-125b-5p	-0.07	-0.4	< 0.1
RAB1B	ENSG00000174903.16	11108	0.538671	0.17406	3.09475	0.00196982	0.0514458	ENSG00000174903	ENST00000311481.6	RAB1B, member RAS oncogene family	5	0	0	0	0	1	0	1	0	1	hsa-miR-125b-5p	-0.11	-0.11	< 0.1
SLC29A4	ENSG00000164638.10	10613.9	0.532099	0.165516	3.21479	0.0013054	0.0398514	ENSG00000164638	ENST00000396872.3	solute carrier family 29 (equilibrative nucleoside transporter), member 4	61	0	0	0	0	5	1	2	2	2	hsa-miR-125b-5p	-0.11	-0.21	< 0.1
ZNF580	ENSG00000213015.9	1830.32	0.529092	0.171263	3.08936	0.00200591	0.051912	ENSG00000213015	ENST00000325333.5	zinc finger protein 580	154	0	0	0	0	1	0	1	0	0	hsa-miR-125a-5p	-0.12	-0.12	< 0.1
ADM2	ENSG00000128165.9	1311.45	0.526705	0.168051	3.13419	0.00172326	0.0471702	ENSG00000128165	ENST00000395738.2	adrenomedullin 2	129	0	0	0	0	1	1	0	0	2	hsa-miR-125a-5p	-0.1	-0.11	< 0.1
CDIP1	ENSG00000089486.17	4207.34	0.524536	0.16143	3.2493	0.00115688	0.0365929	ENSG00000089486	ENST00000564828.1	cell death-inducing p53 target 1	1857	0	0	0	0	1	0	1	0	0	hsa-miR-125a-5p	-0.07	-0.1	< 0.1
IQSEC3	ENSG00000120645.12	2613.06	0.524081	0.164816	3.17979	0.00147384	0.0431429	ENSG00000120645	ENST00000538872.1	IQ motif and Sec7 domain 3	5	0	0	0	0	2	1	0	1	1	hsa-miR-125b-5p	-0.23	-0.23	< 0.1
RPL18A	ENSG00000105640.13	22668.5	0.517505	0.160854	3.21722	0.00129437	0.039621	ENSG00000105640	ENST00000600147.1	ribosomal protein L18a	101	0	0	0	0	1	0	1	0	0	hsa-miR-125a-5p	-0.02	-0.2	< 0.1
SLC48A1	ENSG00000211584.14	1074.79	0.515157	0.170541	3.02073	0.00252169	0.0597585	ENSG00000211584	ENST00000442218.2	solute carrier family 48 (heme transporter), member 1	470	0	0	0	0	1	0	1	0	1	hsa-miR-125b-5p	-0.15	-0.16	< 0.1
PIN1	ENSG00000127445.14	4577.63	0.511884	0.17122	2.98962	0.00279321	0.0640916	ENSG00000127445	ENST00000247970.4	peptidylprolyl cis/trans isomerase, NIMA-interacting 1	934	0	0	0	0	2	1	1	0	0	hsa-miR-125a-5p	0	-0.38	< 0.1
CTDSP1	ENSG00000144579.7	3597.64	0.509317	0.165383	3.07962	0.00207263	0.053036	ENSG00000144579	ENST00000273062.2	CTD (carboxy-terminal domain, RNA polymerase II, polypeptide A) small phosphatase 1	1299	0	0	0	0	1	0	1	0	1	hsa-miR-125b-5p	-0.1	-0.1	< 0.1
PPDPF	ENSG00000125534.10	20541	0.500797	0.142315	3.51893	0.000433285	0.0195787	ENSG00000125534	ENST00000370179.3	pancreatic progenitor cell differentiation and proliferation factor	17979	0	0	0	0	1	0	0	1	1	hsa-miR-125a-5p	0	-0.09	< 0.1
CDKN2A	ENSG00000147889.17	4739.14	0.48281	0.161868	2.98274	0.00285684	0.0648316	ENSG00000147889	ENST00000498124.1	cyclin-dependent kinase inhibitor 2A	354	0	0	0	0	1	0	1	0	0	hsa-miR-125b-5p	-0.03	-0.26	< 0.1
DPM2	ENSG00000136908.18	3177.68	0.479424	0.167741	2.85813	0.00426149	0.0821076	ENSG00000136908	ENST00000314392.8	dolichyl-phosphate mannosyltransferase polypeptide 2, regulatory subunit	1667	0	0	0	0	2	0	2	0	0	hsa-miR-125a-5p	-0.28	-0.28	< 0.1
QPRT	ENSG00000103485.19	3975.73	0.476762	0.146974	3.24386	0.00117924	0.0369916	ENSG00000103485	ENST00000395384.4	quinolinate phosphoribosyltransferase	1165	0	0	0	0	1	0	0	1	1	hsa-miR-125b-5p	-0.04	-0.24	< 0.1
SSBP4	ENSG00000130511.16	3357.69	0.473264	0.163262	2.8988	0.00374599	0.0764438	ENSG00000130511	ENST00000348495.6	single stranded DNA binding protein 4	510	0	0	0	0	1	0	1	0	1	hsa-miR-125a-5p	-0.09	-0.09	< 0.1
PAQR4	ENSG00000162073.14	6109.16	0.466494	0.160632	2.90411	0.00368296	0.0757002	ENSG00000162073	ENST00000318782.8	progestin and adipoQ receptor family member IV	703	0	0	0	0	3	0	2	1	0	hsa-miR-125a-5p	-0.31	-0.32	< 0.1
NR2F6	ENSG00000160113.5	3998.75	0.462606	0.163412	2.83092	0.00464138	0.0869266	ENSG00000160113	ENST00000291442.3	nuclear receptor subfamily 2, group F, member 6	814	0	0	0	0	1	0	1	0	1	hsa-miR-125b-5p	0	-0.13	< 0.1
BSG	ENSG00000172270.20	22500.8	0.453424	0.148545	3.05244	0.00226988	0.0568067	ENSG00000172270	ENST00000346916.4	basigin	6876	0	0	0	0	1	1	0	0	0	hsa-miR-125a-5p	-0.29	-0.34	< 0.1
RPL37	ENSG00000145592.14	4875.77	0.426872	0.154041	2.77116	0.00558569	0.0984769	ENSG00000145592	ENST00000274242.5	ribosomal protein L37	1785	0	0	0	0	3	1	0	2	0	hsa-miR-125a-5p	-0.44	-0.53	< 0.1

## Sheet: Mientornet enrichment results
Supplemental Table 3. Mienturnet Enrichment results TargetScan
Seed	miRNA family	p-value	FDR	Odd ratio	Number of interactions	Target Gene 1	Target Gene 2	Target Gene 3	Target Gene 4	Target Gene 5	Target Gene 6	Target Gene 7	Target Gene 8	Target Gene 9	Target Gene 10	Target Gene 11	Target Gene 12	Target Gene 13	Target Gene 14	Target Gene 15	Target Gene 16	Target Gene 17	Target Gene 18	Target Gene 19	Target Gene 20	Target Gene 21	Target Gene 22	Target Gene 23	Target Gene 24	Target Gene 25	Target Gene 26	Target Gene 27	Target Gene 28	Target Gene 29	Target Gene 30	Target Gene 31	Target Gene 32	Target Gene 33	Target Gene 34	Target Gene 35	Target Gene 36	Target Gene 37	Target Gene 38	Target Gene 39	Target Gene 40	Target Gene 41	Target Gene 42	Target Gene 43	Target Gene 44
UUAUUGA	hsa-miR-325-3p	0.0699939	1	0.852495	76	SCT	TMED1	MAZ	APOC3	HCN2	LRP3	FLYWCH1	RPLP1	GCHFR	GLIS2	ILVBL	TMEM115	G6PC3	MED16	ZNF787	RPL37	ALDH16A1	AMN	SLC27A4	VKORC1	IRF2BP1	TSEN34	ECEL1	DCXR	RAC3	RNASEH2C	GRB7	NDUFS7	COX8A	DPM2	PAQR4	CD151	ZNF580	SSTR3	CRIP2	NAT8L	C2CD4C	EMID1	YIF1B	PTGES2	PLEC	NFIC	FBXO2	SSR4
AAGGCAC	hsa-miR-124-3p.1	0.975242	1	1.31153	38	CTDSP1	NFIC	RNPEPL1	NAT8L	CEBPA	SERINC2	TMEM134	PLEC	GLIS2	PIM3	LMF2	GPR153	SNTA1	SLC25A39	LIMD2	NME4	PGF	TMED1	CD151	RPS6KA4	GPC1	SPOCK2	ARRDC1	MACROD2	FBRSL1	CACFD1	SLC48A1	ABCA2	TMEM129	SDF2L1	PALM	KLF16	CTXN1	THEM6	AGRN	SLC25A1	GAMT	NTNG2
CCCUGAG	hsa-miR-125a-5p/hsa-miR-125b-5p/hsa-miR-4319	0.199381	1	0.849804	30	SSTR3	TLE3	LRRC10B	LFNG	BAK1	KLF16	MAP3K11	SLC8A2	LIMD2	GPC1	RASL10B	SLC27A4	TMED1	SPTBN2	MEGF8	CAMSAP3	UBTD1	TIMM17B	EMID1	TMEM198	MAPK8IP2	FAM89B	GPR153	NFIC	FAM83F	ZFHX2	GLIS2	RNASEH2C	MMP11	PET100
UAUUGCU	hsa-miR-137	0.93889	1	1.28507	28	HCN2	GLIS2	LRRC10B	NAT8L	NUCKS1	ABHD17A	RCOR2	CACNA1H	SPOCK2	CACFD1	C2CD4C	FOXP4	ILVBL	DSCAML1	RPL37	BBX	SLC12A5	GIPC1	SLC9A3R2	ENHO	PTGES2	PPP1R14B	VKORC1	DNLZ	SH3TC1	CAMK2N1	RPL28	HOMER1
AGCAGCA	hsa-miR-15a-5p/hsa-miR-15b-5p/hsa-miR-16-5p/hsa-miR-195-5p/hsa-miR-424-5p/hsa-miR-497-5p/hsa-miR-6838-5p	0.997681	1	1.59562	26	SPTBN2	CBFA2T3	NUCKS1	WNT4	PSKH1	HSPG2	NAT8L	KLHDC8B	FAM171A2	PIM3	CARD10	EGLN2	GPR153	NFIC	C11orf68	MAP1A	PWWP2B	RABAC1	UCP2	AMIGO3	SSTR3	SLC9A3R2	IRF2BP1	ZYX	CERS1	TRMT112
UUGGCAC	hsa-miR-1271-5p/hsa-miR-96-5p	0.960848	1	1.36119	24	CTDSP1	CAMK2N1	CBFA2T3	PRRT3	TMEM198	ABCA2	TBX1	NAT8L	FAM83F	GPC1	CHMP1A	TMEM115	TSPAN4	NFIC	LMTK3	RNF208	SYNGR2	HOMER1	SLC25A1	SLC12A5	SLC18A3	WNK2	RPL36A-HNRNPH2	GPRC5C
AGCACCA	hsa-miR-29a-3p/hsa-miR-29b-3p/hsa-miR-29c-3p	0.989517	1	1.5061	23	NFIC	BAK1	PALM	GLIS2	MFAP2	NTNG2	R3HDM4	SPATA2L	RNPEPL1	CACFD1	FBXW9	CHMP6	HOMER1	TSPAN4	MAZ	ENHO	FAM83F	TMEM132A	UBTD1	ARF5	GLYCTK	NUCKS1	CERS1
GAGGUAG	hsa-let-7a-5p/hsa-let-7b-5p/hsa-let-7c-5p/hsa-let-7d-5p/hsa-let-7e-5p/hsa-let-7f-5p/hsa-let-7g-5p/hsa-let-7i-5p/hsa-miR-4458/hsa-miR-4500/hsa-miR-98-5p	0.979023	1	1.43704	23	CERCAM	CDC34	NAT8L	CBFA2T3	RASL10B	LIMD2	KLHDC8B	GIPC1	KCTD17	MMP11	DUSP9	CACFD1	SLC8A2	NME4	BBX	TIMM17B	EGLN2	B3GAT3	UNC5A	LRRC10B	LRFN4	ADAM15	MPST
UAUAAAG	hsa-miR-340-5p	0.99901	1	1.73388	22	MACROD2	SLC12A5	GLIS2	FGFR4	SHISA5	IRF2BP1	C2CD4C	SIVA1	NUCKS1	AGPAT2	FOXO6	CERCAM	SPOCK2	TMEM198	MAPK8IP2	BBX	FBRSL1	CISD3	COX7B	RPS6KA4	RNH1	PAK4
CUUUGGU	hsa-miR-9-5p	0.999755	1	1.90042	20	FOXP4	NFIC	PAK4	SLC27A4	RPS6KA4	C1QL1	MMP15	COL18A1	PRRT3	PIM3	WNT4	SYNGR2	GPR153	CISD3	SPTBN2	MAP1A	HCN2	SHISA5	SORBS3	NME4
GGCAGUG	hsa-miR-34a-5p/hsa-miR-34c-5p/hsa-miR-449a/hsa-miR-449b-5p	0.592286	1	1.03236	20	CBFA2T3	ALDOA	LIMD2	G6PC3	ORAI3	SLC27A4	SPTBN2	SIPA1	AGTRAP	RPS6KA4	SLC2A4RG	TMEM134	ZNF593	CDIP1	PGF	MAP1A	LMTK3	MAZ	CERS4	FXYD2
UUGGCAA	hsa-miR-182-5p	0.999372	1	1.81964	20	CBFA2T3	CAMK2N1	GPC1	CHMP1A	TMEM115	NFIC	PRRT3	TSPAN4	ABCA2	TMEM198	TBX1	CTDSP1	NAT8L	CEBPA	SYNGR2	RNF208	SPTBN2	SLC25A10	WNK2	RPL36A-HNRNPH2
CCAGGAG	hsa-miR-665	0.10213	1	0.729269	19	TIMM13	FCGRT	TMEM115	BCAM	ZNF787	TMEM129	FAM83F	PALM	NTMT1	DLGAP3	IGF2	TRMT61A	TP53I11	RASSF7	MPST	NRGN	ATG2A	C11orf68	SYNGR2
UAAGGCA	hsa-miR-124-3p.2/hsa-miR-506-3p	0.999689	1	1.90965	19	NFIC	MACROD2	FBRSL1	TMEM134	AKR7A2	RASL10B	SLC48A1	LMF2	ABCA2	TMEM129	TMED1	SERINC2	KLF16	THEM6	AGRN	TMEM198	PSKH1	SLC35B2	CTDSP1
UGGCACU	hsa-miR-183-5p.2	0.781928	1	1.1602	19	CAMK2N1	PRRT3	SLC8A2	CTDSP1	FAM83F	TMEM198	ABCA2	NAT8L	TBX1	MAPK8IP1	HOMER1	SLC18A3	LMTK3	BBX	TMEM129	LYPLA2	WNK2	RPL36A-HNRNPH2	GPRC5C
CACAGUG	hsa-miR-128-3p/hsa-miR-216a-3p/hsa-miR-3681-3p	0.999284	1	1.86361	18	DLGAP3	FBRSL1	CDIP1	FOXP4	ZBTB42	NR2F6	CBFA2T3	AGRN	ALDH4A1	RNPEPL1	BAK1	BBX	G6PC3	SLC29A4	PDLIM2	COX7B	PDLIM4	RPL36A-HNRNPH2
CUCUGGG	hsa-miR-326/hsa-miR-330-5p	0.174928	1	0.784997	18	SLC8A2	DGCR6L	GLIS2	RASL10B	G6PC3	SLC27A4	CBFA2T3	SSTR3	FAM83F	PALM	PLEC	DLGAP3	GPR153	MAP1A	NRGN	HOMER1	IQSEC3	TLE3
GAGGCUG	hsa-miR-485-5p/hsa-miR-6884-5p	0.0675468	1	0.681547	18	TIMM13	APOC3	JUND	DISP2	SPNS2	FAM83F	ZNF81	VWA1	PLEC	NTMT1	DLK2	SDHAF1	PTMS	ZFHX2	SLC48A1	SPTBN2	STARD10	PAK4
UCACAGU	hsa-miR-27a-3p/hsa-miR-27b-3p	0.999975	1	2.16178	18	FOXP4	ZBTB42	DLGAP3	NR2F6	FBRSL1	SLC27A4	CAPN15	CBFA2T3	CDIP1	AGRN	BAK1	BBX	ALDH4A1	GIPC1	G6PC3	TMUB1	PDLIM4	PDLIM2
GGGCCCC	hsa-miR-296-5p	4.07875e-05	0.00827987	0.325382	17	LIMD2	TMEM115	EPN1	VPS51	SPNS2	NFIC	FOXP4	DLGAP3	LYPLA2	MAGIX	TMEM134	SLC29A4	ATG2A	RNF5	YIF1A	STOML1	FKBP8
CUGGCUG	hsa-miR-3064-5p/hsa-miR-6504-5p	0.371443	1	0.90527	17	NFIC	FAM83F	TMEM134	PGF	SPTBN2	ATG2A	BAK1	RASL10B	PLEC	R3HDM4	CDIP1	ABHD17A	GLYCTK	DERL3	RPL28	RASSF7	GPRC5C
GAGGGGC	hsa-miR-3184-5p/hsa-miR-423-5p	0.00066274	0.0672681	0.397062	16	C20orf27	VGF	RASL10B	MED16	RNPEPL1	ZNF787	FOXP4	DLGAP3	MFAP2	SRM	PEX16	DERL3	RNF5	VPS37D	YIF1A	METRN
AAAGUGC	hsa-miR-106a-5p/hsa-miR-106b-5p/hsa-miR-17-5p/hsa-miR-20a-5p/hsa-miR-20b-5p/hsa-miR-519d-3p/hsa-miR-526b-3p/hsa-miR-93-5p	0.999998	1	2.52842	15	ANKRD9	NBL1	CAPN15	ALG3	NFIC	E2F1	CAMK2N1	ATG2A	BBX	MAP3K11	FAM83F	CAMK2N2	CERCAM	RPS6KA4	SLC48A1
AUAAAGU	hsa-miR-142-5p/hsa-miR-5590-3p	0.99451	1	1.73429	15	NUCKS1	CERCAM	ALG3	TMEM54	SPOCK2	RPS6KA4	FBRSL1	SIVA1	BBX	TAF10	DNLZ	PLEKHJ1	CDC34	COX7B	RNH1
AUGGCUU	hsa-miR-135a-5p/hsa-miR-135b-5p	0.976951	1	1.54809	15	KLF16	GLYCTK	SLC9A3R2	NUCKS1	GPC1	CAPN15	FAM83F	BBX	SNTA1	HCN2	CENPB	MMP11	RAB1B	NR2F6	TIMM13
CCUUGGC	hsa-miR-212-5p	0.231878	1	0.806903	15	SPTBN2	SLC16A3	CTDSP1	TMEM115	IGFBP4	CBFA2T3	FOXP4	CDIP1	GPC1	VWA1	PDLIM4	LYPLA2	SLC35B2	TCEA2	WNK2
UCACAUU	hsa-miR-130a-5p/hsa-miR-23a-3p/hsa-miR-23b-3p/hsa-miR-23c	0.999994	1	2.44992	15	CBFA2T3	GPSM1	NRGN	EGLN2	NUCKS1	NAA38	EPN1	BBX	SLC2A4RG	CAMK2N1	VPS37D	CEBPA	CIB2	NDUFA3	GLYCTK
UUGGUCC	hsa-miR-133a-3p.2/hsa-miR-133b	0.883121	1	1.29798	15	FOXP4	DLGAP3	CAPN15	FTL	MMP15	SLC27A4	SLC25A39	WNT4	C1QL1	SLC8A2	SORBS3	PWWP2B	CDIP1	SHISA5	VKORC1
AGCUGCC	hsa-miR-22-3p	0.807699	1	1.2127	14	LRRC73	FAM83F	FTL	RPS9	CENPB	CAMK2N1	DPM2	HOMER1	RASL10B	MACROD2	SLC48A1	PALM	FAM89B	RPL36A-HNRNPH2
AUUGCAC	hsa-miR-25-3p/hsa-miR-32-5p/hsa-miR-363-3p/hsa-miR-367-3p/hsa-miR-92a-3p/hsa-miR-92b-3p	0.999419	1	2.03617	14	SLC12A5	SPOCK2	CBFA2T3	C2CD4C	DSCAML1	NFIC	CACNA1H	RPS6KA4	FOXP4	NUCKS1	HCN2	BAK1	CEBPA	CHCHD10
GGAAUGU	hsa-miR-1-3p/hsa-miR-206/hsa-miR-613	0.993924	1	1.75255	14	GLIS2	SLC8A2	JUND	ZNF580	ORAI3	TSPAN4	SLC16A3	IGFBP4	MTX1	SLC27A4	MAP1A	ELOF1	NUCKS1	NINJ1
GUGCAAA	hsa-miR-19a-3p/hsa-miR-19b-3p	0.999998	1	2.61905	14	NFIC	FAM83F	HOMER1	PRRT3	LIMD2	GPR153	TNFRSF12A	GLIS2	SLC35C2	SLC48A1	CISD3	SLC2A4RG	SIVA1	CARD10
AACACUG	hsa-miR-141-3p/hsa-miR-200a-3p	0.99753	1	1.90632	13	IGF2	EPN1	SPOCK2	SRM	FBRSL1	PDXP	NUCKS1	SHISA5	CRIP2	GPRC5C	TSPAN4	BBX	TMEM129
ACAUUCA	hsa-miR-181a-5p/hsa-miR-181b-5p/hsa-miR-181c-5p/hsa-miR-181d-5p/hsa-miR-4262	1	1	2.88792	13	PAK4	CBFA2T3	NUCKS1	GPSM1	G6PC3	MAP1A	HCN2	SLC12A5	RASL10B	HOMER1	UNC5A	CARD10	TMEM134
GCAGGAA	hsa-miR-873-5p.2	0.666638	1	1.09113	13	SLC25A39	AKR7A2	RAB1B	NDUFS7	C8orf82	ORAI3	WNK2	CHCHD5	SLC48A1	CEBPA	RPUSD1	SLC16A3	PAK4
GCUGGUG	hsa-miR-138-5p	0.953084	1	1.48293	13	FOXP4	CAMK2N1	MAP3K11	TMEM198	NINJ1	TAF10	UNC5A	PMVK	C19orf25	TBL3	GRB7	WNK2	RPUSD1
GGCUCAG	hsa-miR-24-3p	0.978064	1	1.60299	13	PAK4	PSKH1	LIMD2	TMEM115	FCGRT	COMTD1	WNT4	MED16	RPL36	WNK2	PDLIM2	LAMTOR4	UCP2
GUAAACA	hsa-miR-30a-5p/hsa-miR-30b-5p/hsa-miR-30c-5p/hsa-miR-30d-5p/hsa-miR-30e-5p	1	1	3.31973	13	CAMK2N1	SBF1	FAM83F	FOXP4	BBX	G6PC3	JUNB	ESPN	CAMK2N2	NUCKS1	STOML1	RTN4R	PAK4
CAAAGCA	hsa-miR-330-3p	0.999894	1	2.35271	12	CDC34	MACROD2	SORBS3	NAA38	GPC1	VKORC1	NAT8L	ABCA2	E2F1	PIM3	COX7B	CDIP1
CACCUCC	hsa-miR-1306-5p	0.0842317	1	0.638951	12	FAM83F	TMED1	NFIC	CISD3	SPTBN2	STOML1	ALDOA	VWA1	NUDT18	TCEA2	RPS9	TRMT112
CCACAGG	hsa-miR-140-3p.1	0.956332	1	1.51751	12	LFNG	FCGRT	TRIM28	DLGAP3	NBL1	MFAP2	CISD3	PET100	PAQR4	GLYCTK	NUDT18	TMEM208
UCACACA	hsa-miR-377-3p	0.938847	1	1.45818	12	RASL10B	G6PC3	PSKH1	CAMK2N2	PRR7	ZNF580	SSTR3	DOK1	SLC35C2	CAMK2N1	MAP1A	COX7B
AAAGCAC	hsa-miR-6835-3p	0.999795	1	2.34752	11	MAZ	NAA38	NDUFC2	AMN	ZDHHC24	MFAP2	DNPH1	BBX	CISD3	TLE3	CDIP1
AGCCCUU	hsa-miR-129-1-3p/hsa-miR-129-2-3p	0.838173	1	1.27956	11	CAMK2N1	NUCKS1	FAM83F	CACFD1	CIB2	GPC1	SLC48A1	CENPB	SYNGR2	TBL3	PDLIM4
GCAGCAU	hsa-miR-103a-3p/hsa-miR-107	0.998519	1	2.07866	11	SRM	WNT4	NAT8L	SLC8A2	CAMK2N1	PWWP2B	RAB1B	RPUSD1	BAK1	HSD3B7	TRMT112
GGCUCUG	hsa-miR-760	0.91397	1	1.41399	11	MMP15	RASL10B	MAP3K11	NDUFAF3	TAS1R3	PPDPF	GPR153	WNK2	RPL36A-HNRNPH2	GPRC5C	GFER
UGGUCCC	hsa-miR-133a-3p.1	0.928781	1	1.45133	11	DLGAP3	CAPN15	FTL	FOXP4	MMP15	SLC8A2	SHISA5	PGLS	CDIP1	RNASEH2C	CLEC11A
AAAGCUG	hsa-miR-320a/hsa-miR-320b/hsa-miR-320c/hsa-miR-320d/hsa-miR-4429	0.999542	1	2.31939	10	FTL	E2F1	NXPH4	MAGIX	LAGE3	CHST8	SLC48A1	BAK1	TM7SF2	SYNGR2
AACAAAC	hsa-miR-495-3p/hsa-miR-5688	0.999704	1	2.38237	10	CDC34	MACROD2	PRR7	NAT8L	C2CD4C	TESC	ABCA2	NUCKS1	RPL36A-HNRNPH2	CISD3
AAUACUG	hsa-miR-200b-3p/hsa-miR-200c-3p/hsa-miR-429	1	1	3.27508	10	GLIS2	SBF1	LFNG	PIN1	GAL3ST1	TUBB3	LYPLA2	ZNF771	NFIC	BBX
ACACACC	hsa-miR-329-3p/hsa-miR-362-3p	0.523634	1	0.983071	10	SLC8A2	TPRA1	MLST8	PRR7	NDUFAF3	FAM83F	KCTD11	E2F1	SBF1	ALDOA
CAGGAAC	hsa-miR-873-5p.1	0.593149	1	1.03784	10	MAZ	C8orf82	HSD3B7	DLGAP3	CAMK2N1	MPST	NUDT16L1	GPX1	SPTBN2	PAK4
CCCCUGG	hsa-miR-331-3p	0.136264	1	0.670898	10	TIMM13	SLC25A1	ZNF593	SPNS2	FAM83F	DLGAP3	ATG2A	PTRH1	BAK1	ABHD17A
GUGGGGA	hsa-miR-491-5p	0.0375626	1	0.523027	10	RASL10B	TAF10	OTOP3	VWA1	FOXP4	DLGAP3	GIPC1	DERL3	RPUSD1	NLE1
UCCAGUU	hsa-miR-145-5p/hsa-miR-5195-3p	0.999856	1	2.48369	10	PAK4	MAP3K11	EPN1	RPL36A-HNRNPH2	ZFHX2	NINJ1	NDUFA4	NUCKS1	ENHO	ATP6V0B
UGCCCUG	hsa-miR-874-3p	0.395257	1	0.887229	10	SLC12A5	LRP3	GLIS2	TMEM115	RASL10B	VKORC1	MEGF8	TIMM17B	DSCAML1	STOML1
UGUGCUU	hsa-miR-218-5p	0.999997	1	3.01767	10	BBX	GPR153	CHST8	FBRSL1	NAT8L	CENPB	UBTD1	ZFHX2	SLC35B2	RPS9
UUUUUGC	hsa-miR-129-5p	0.996521	1	2.01269	10	CAMK2N1	FAM83F	HOMER1	SLC2A4RG	FOXP4	SLC16A3	CIB2	IGFBP4	NFIC	ZFHX2
CAGUGCA	hsa-miR-148a-3p/hsa-miR-148b-3p/hsa-miR-152-3p	0.999616	1	2.44018	9	LIMD2	NAT8L	TMEM54	HOMER1	MMP15	RNPEPL1	BBX	NAT14	RPUSD1
CCAGCAU	hsa-miR-338-3p	0.927698	1	1.50001	9	BBX	MACROD2	SLC27A4	RNASEH2C	YIF1B	VWA1	RPUSD1	DNPH1	TRMT112
CCAGUGU	hsa-miR-199a-5p/hsa-miR-199b-5p	0.991741	1	1.92902	9	MAP3K11	BCAM	ZBTB42	PAK4	JUNB	LIMD2	TST	NBL1	AMN
GAGAUGA	hsa-miR-143-3p/hsa-miR-4770/hsa-miR-6088	0.931573	1	1.51218	9	FAM83F	TMEM134	YIF1B	NFIC	ABHD14A	VWA1	MPST	SLC35B2	ABHD17A
UACAGUA	hsa-miR-101-3p.2	1	1	3.45642	9	BBX	DLGAP3	MMP15	CAMK2N1	CD81	CEBPA	RPL36A-HNRNPH2	TBX1	HOMER1
ACAGUAC	hsa-miR-101-3p.1	0.999996	1	3.27234	8	BBX	DLGAP3	MMP15	FOXP4	CEBPA	JUNB	NAT8L	PDLIM2
ACAGUAU	hsa-miR-144-3p	0.999999	1	3.58725	8	AGRN	BBX	PSKH1	DLGAP3	MMP15	TOP2A	TBX1	CEBPA
AGUGCAA	hsa-miR-130a-3p/hsa-miR-130b-3p/hsa-miR-301a-3p/hsa-miR-301b-3p/hsa-miR-3666/hsa-miR-4295/hsa-miR-454-3p	0.999999	1	3.52222	8	TCIRG1	LIMD2	NFIC	RNPEPL1	BBX	HOMER1	SLC2A4RG	SLC12A5
AGUGGUU	hsa-miR-140-5p	0.912103	1	1.48556	8	TMEM115	CERCAM	PIN1	CAMK2N1	SBF1	NUCKS1	SLC29A4	PAK4
CUCACAC	hsa-miR-342-3p	0.649859	1	1.09192	8	NUCKS1	SPOCK2	CAMK2N1	MAGIX	PDLIM2	C19orf25	NDUFA11	FXYD3
CUGGCUC	hsa-miR-149-5p	0.965362	1	1.70121	8	MMP15	RASL10B	PSKH1	R3HDM4	GPR153	VPS37D	PGF	RPL28
GGGUCUU	hsa-miR-193a-5p	0.267925	1	0.763318	8	BCL7C	G6PC3	ZNF81	IGF2	CISD3	DSCAML1	MPST	RPS2
UCAAGUA	hsa-miR-1297/hsa-miR-26a-5p/hsa-miR-26b-5p/hsa-miR-4465	0.999999	1	3.57698	8	GPSM1	BAK1	BBX	MAP1A	SPOCK2	HOMER1	PIM3	CISD3
AACAUUC	hsa-miR-543	0.999909	1	2.96525	7	SLC12A5	SDF2L1	UBE2M	IGFBP4	FAM83F	SPOCK2	COX7B
AAGUGCU	hsa-miR-302a-3p/hsa-miR-302b-3p/hsa-miR-302c-3p.1/hsa-miR-302d-3p/hsa-miR-302e/hsa-miR-372-3p/hsa-miR-373-3p/hsa-miR-520a-3p/hsa-miR-520b/hsa-miR-520c-3p/hsa-miR-520d-3p/hsa-miR-520e	1	1	3.98627	7	CAMK2N1	ZFPM1	SBF1	MAP3K11	E2F1	FAM83F	TSEN34
AUACAAG	hsa-miR-300/hsa-miR-381-3p	0.999982	1	3.25865	7	KLF16	GPC1	CTU2	RHBDD2	NFIC	NUCKS1	PTMS
GAAACAU	hsa-miR-494-3p	0.998635	1	2.45279	7	JUND	CTDSP1	ORAI3	NFIC	C1orf122	SLC9A3R2	DSCAML1
GGAAGAC	hsa-miR-7-5p	0.995577	1	2.21416	7	NDUFA4	NFIC	NUCKS1	PLEC	FGFR4	ZNF593	NDUFA3
GUAACAG	hsa-miR-194-5p	0.976728	1	1.85035	7	NUCKS1	FAM83F	SRM	DUSP9	GIPC1	ATP6V1F	MFAP2
GUGACAG	hsa-miR-542-3p	0.852626	1	1.377	7	MAP3K11	INTS5	ATG2A	SLC48A1	RPS6KA4	SPTBN2	CDIP1
UCAACAC	hsa-miR-505-3p.2	0.904303	1	1.49827	7	MMP15	MAZ	G6PC3	CAMK2N2	FAM83F	RPL36A-HNRNPH2	NLE1
UGUACAU	hsa-miR-493-5p	0.99996	1	3.11391	7	NDUFC2	SPNS2	CAMK2N1	BBX	FBRSL1	CISD3	ABHD17A
UUCCUCA	hsa-miR-670-3p	0.99457	1	2.17113	7	VGF	RPL37	FAM83F	ZNF81	CAMK2N1	MPST	RPL36
AAAGAAU	hsa-miR-186-5p	1	1	4.35399	6	WNT4	KNDC1	ZNF81	NUCKS1	LRRC10B	NLE1
AAGGUGC	hsa-miR-18a-5p/hsa-miR-18b-5p/hsa-miR-4735-3p	0.877535	1	1.46502	6	BBX	ORAI3	CAMK2N1	HOMER1	MESP1	ROMO1
ACUGGCC	hsa-miR-193a-3p/hsa-miR-193b-3p	0.799721	1	1.30528	6	PAK4	GRB7	FAM83F	BAK1	TCEA2	ABHD17A
AGCAGCG	hsa-miR-503-5p	0.858387	1	1.41938	6	SPTBN2	WNT4	CBFA2T3	PSKH1	CHPF	MAPK8IP2
AGGUCAC	hsa-miR-1193/hsa-miR-370-5p	0.873888	1	1.45589	6	IGFBP4	PSKH1	PIM3	FOXP4	BBX	ATG2A
CAGUAGU	hsa-miR-199a-3p/hsa-miR-199b-3p/hsa-miR-3129-5p	0.990844	1	2.1633	6	PAK4	CD151	BBX	PCBP4	CERS1	PHPT1
CUCCCAC	hsa-miR-532-3p	0.900665	1	1.52892	6	NFIC	DNLZ	SLC35C2	ZFHX2	CISD3	PAK4
GAUUGUC	hsa-miR-219a-5p/hsa-miR-4782-3p/hsa-miR-6766-3p	0.985442	1	2.04921	6	CBFA2T3	KLF16	PPP1R14B	NFIC	SLC8A2	MEGF8
GGAGAGA	hsa-miR-185-5p/hsa-miR-4306/hsa-miR-4644	0.95531	1	1.75711	6	OTOP3	ZNF81	SLC35C2	DLGAP3	SRM	ATP6V1F
GGAGUGU	hsa-miR-122-5p	0.5883	1	1.03145	6	ALDOA	CD320	SLC52A2	SPOCK2	G6PC3	SLC29A4
GGCAAGA	hsa-miR-31-5p	0.991347	1	2.177	6	HOMER1	NFIC	AGRN	CDIP1	MAGIX	CEBPA
GUAGUGU	hsa-miR-142-3p.1	0.953794	1	1.74799	6	EPN1	NR2F6	MAP3K11	TMEM115	TSEN34	NUCKS1
UAGUGUU	hsa-miR-142-3p.2	0.999303	1	2.75205	6	NFIC	TMEM115	MAP3K11	TSEN34	PLEC	TNFRSF12A
UCAUGAU	hsa-miR-433-3p	0.916118	1	1.57912	6	NR2F6	COX8A	NUCKS1	FOXO6	SLC35B2	PAK4
UCCCUUU	hsa-miR-204-5p/hsa-miR-211-5p	0.999989	1	3.61007	6	NXPH4	SDHAF1	WNT4	CBFA2T3	NFIC	FAM83F
UGAAAUG	hsa-miR-203a-3p.2	1	1	5.08879	6	BBX	HOMER1	C11orf68	C1orf122	TFF3	PIM3
UGCAUAG	hsa-miR-153-3p	0.999999	1	4.04365	6	NFIC	CIB2	FBRSL1	CAPN15	BBX	RPL36A-HNRNPH2
UGCAUAU	hsa-miR-448	0.999883	1	3.13086	6	CAPN15	CIB2	UNC5A	NFIC	RPL36A-HNRNPH2	HOMER1
UGCAUUG	hsa-miR-33a-5p/hsa-miR-33b-5p	0.997703	1	2.48734	6	PIM3	SLC12A5	MACROD2	CAMK2N1	ISOC2	SHISA5
GCGGGGC	hsa-miR-744-5p	0.00976717	0.52825	0.262883	5	LRP3	JUNB	NRGN	CISD3	VPS37D
AAGUCAC	hsa-miR-224-5p	0.994216	1	2.42619	5	SLC12A5	G6PC3	SLC35C2	AGRN	PAK4
ACCACAG	hsa-miR-140-3p.2	0.998067	1	2.71645	5	MAGIX	MAP1LC3A	HSPG2	BAK1	SLC35B2
ACCCUGU	hsa-miR-10a-5p/hsa-miR-10b-5p	0.959344	1	1.86756	5	PRRT3	BBX	RASL10B	KCTD17	SLC25A1
AGGAGCU	hsa-miR-28-5p/hsa-miR-3139/hsa-miR-708-5p	0.790731	1	1.31441	5	DGCR6L	BCAM	NUDT16L1	SLC37A4	RPL28
AGGUAGU	hsa-miR-196a-5p/hsa-miR-196b-5p	0.977786	1	2.04829	5	CBFA2T3	SLC8A2	NME4	CDC34	KLHDC8B
AGUGCUU	hsa-miR-302c-3p.2/hsa-miR-520f-3p	0.999982	1	3.85013	5	CAMK2N1	COX7B	TSEN34	RPS6KA4	C19orf48
AUGGCAC	hsa-miR-183-5p.1	0.998533	1	2.78765	5	CTDSP1	MACROD2	SLC8A2	MAPK8IP1	LYPLA2
CACUCCU	hsa-miR-483-3p.2	0.515049	1	0.947473	5	G6PC3	CAMK2N2	AMN	HOMER1	NUDT18
CAGUCCA	hsa-miR-455-3p.1	0.986459	1	2.19069	5	CAMK2N1	MFAP2	RPS6KA4	CERS4	SORBS3
CCCUGUC	hsa-miR-339-5p	0.669391	1	1.1282	5	MMP15	FAM3A	SPTBN2	TLE3	CERS4
CCUUCAU	hsa-miR-205-5p	0.999767	1	3.2477	5	NDUFA4	E2F1	TCEA2	WNK2	NUDT18
CUACAGU	hsa-miR-139-5p	0.992785	1	2.36594	5	TBX1	MPND	CKB	BBX	HOMER1
CUCCCAA	hsa-miR-150-5p	0.969002	1	1.94971	5	RNASEH2C	NFIC	SBF1	TMEM134	CISD3
GAGAACU	hsa-miR-146a-5p/hsa-miR-146b-5p/hsa-miR-7153-5p	0.891066	1	1.54991	5	AMN	CARD10	FAM83F	NUCKS1	LFNG
GGAUUUC	hsa-miR-3167/hsa-miR-876-5p	0.940174	1	1.74707	5	G6PC3	CBFA2T3	NXPH4	BBX	ZFHX2
GUCAGUU	hsa-miR-223-3p	0.989893	1	2.27284	5	E2F1	PEX16	NUCKS1	NFIC	NLE1
UAAUACA	hsa-miR-374c-5p/hsa-miR-655-3p	0.999999	1	4.65521	5	RRP9	PACSIN3	NUCKS1	CAMK2N1	CEBPA
UGAGGAC	hsa-miR-1224-5p	0.705409	1	1.17749	5	WNT4	PAQR4	SSTR3	SLC35C2	YDJC
AGAUCAG	hsa-miR-383-5p.2	0.872832	1	1.55402	4	DGCR6L	TPRA1	MEGF8	IGF2
AUAAUAC	hsa-miR-369-3p	0.999975	1	4.25815	4	ZNF771	ZNF81	CEBPA	HOMER1
AUCCUUG	hsa-miR-362-5p	0.753777	1	1.27334	4	ZNF688	TMEM115	DOK1	CDIP1
AUGCACC	hsa-miR-501-3p/hsa-miR-502-3p	0.831173	1	1.43764	4	SLC8A2	ILVBL	TMEM198	TSPAN4
AUGUGGG	hsa-miR-299-3p	0.423875	1	0.828354	4	KNDC1	ORAI3	FOXP4	DLGAP3
CAAGAGC	hsa-miR-335-5p	0.958714	1	1.97847	4	NUCKS1	RPS9	PGF	ALDOA
CCUGUAC	hsa-miR-486-5p	0.705964	1	1.19119	4	SLC12A5	TMEM115	GPR153	ABHD17A
CUCAAAC	hsa-miR-371a-5p	0.996501	1	2.79997	4	MACROD2	EPN1	CRIP2	DLGAP3
GAAAUGU	hsa-miR-203a-3p.1	1	1	6.57206	4	BBX	MACROD2	RPL37	TFF3
GAAGGUC	hsa-miR-493-3p	0.688613	1	1.1638	4	E2F1	HSD3B7	DNLZ	RNF5
GGUAGAC	hsa-miR-3529-5p/hsa-miR-379-5p	0.44226	1	0.848892	4	CACFD1	KNDC1	NTMT1	C19orf25
GUCAACA	hsa-miR-505-3p.1	0.957917	1	1.97162	4	SLC2A4RG	NUCKS1	BBX	ANAPC11
UAUAAUA	hsa-miR-374a-5p/hsa-miR-374b-5p	0.999999	1	5.13443	4	AMN	ZNF771	ZNF81	CEBPA
UCAUAGA	hsa-miR-376a-3p/hsa-miR-376b-3p	0.92635	1	1.76624	4	MACROD2	DOK1	ATG2A	DSCAML1
UCCUAUG	hsa-miR-202-5p	0.947182	1	1.88947	4	NDUFA4	GLYCTK	ALG3	HOMER1
UGAAACA	hsa-miR-653-5p	0.999973	1	4.23761	4	TSEN34	ORAI3	TEX264	C1orf122
UUGUGAC	hsa-miR-758-3p	0.942011	1	1.85524	4	CAMK2N1	TP53I11	FBRSL1	SYNGR2
AUGGCGC	hsa-miR-652-3p	0.0104089	0.52825	0.155174	3	HSD3B7	SLC35C2	RPL28
AACCUGG	hsa-miR-490-3p	0.959025	1	2.15418	3	CACNA1H	NUCKS1	FAM83F
AAUGCCC	hsa-miR-365a-3p/hsa-miR-365b-3p	0.998262	1	3.44121	3	EPN1	NUCKS1	RAB1B
ACCCUGG	hsa-miR-504-5p.1	0.968836	1	2.27284	3	RASL10B	FBRSL1	RPS9
ACUGCAU	hsa-miR-217/hsa-miR-6807-3p	0.999771	1	4.20795	3	SLC35C2	ZFHX2	HOMER1
CUUGUUA	hsa-miR-544a	0.975887	1	2.38237	3	DLGAP3	CENPM	BAK1
GAAUUGU	hsa-miR-219a-2-3p	0.91482	1	1.82557	3	LIMD2	TCIRG1	AMN
GCCUGUC	hsa-miR-214-5p	0.925874	1	1.88947	3	TAF10	GLYCTK	PAK4
GUGACUG	hsa-miR-134-5p/hsa-miR-3118	0.90964	1	1.79819	3	MAGIX	CISD3	TM7SF2
UACAGUU	hsa-miR-582-5p	0.999997	1	5.81445	3	CD81	CAMK2N1	SLC29A4
UAGAGGA	hsa-miR-877-5p	0.700328	1	1.19575	3	SORBS3	CBFA2T3	FOXP4
UCAACAG	hsa-miR-421	0.9997	1	4.10754	3	SLC8A2	G6PC3	NLE1
UCAUUCG	hsa-miR-1298-5p	0.848693	1	1.55174	3	NDUFA4	E2F1	ZFHX2
UGCAGUC	hsa-miR-455-3p.2	0.994566	1	2.99394	3	LIMD2	SH2B2	BBX
UGGCCCU	hsa-miR-328-3p	0.931586	1	1.92598	3	SHISA5	SLC27A4	RPS9
UGUGCGU	hsa-miR-210-3p	0.107078	1	0.38337	3	NDUFA4	FAM89B	CDIP1
UUCCUAG	hsa-miR-384	0.993625	1	2.93005	3	MMP15	FAM83F	LFNG
UUGUUCG	hsa-miR-375	0.990638	1	2.77487	3	IGFBP4	JUND	FAM83F
AACAGUC	hsa-miR-132-3p/hsa-miR-212-3p	0.999978	1	6.48991	2	DUSP9	BBX
AACCGUU	hsa-miR-451a	0.187941	1	0.397062	2	TBX1	MIF
AAGUUGU	hsa-miR-382-5p	0.983825	1	2.98481	2	LIMD2	LMTK3
AAUCUCU	hsa-miR-216b-5p	0.999702	1	5.14812	2	NUCKS1	IQSEC3
AAUGUUG	hsa-miR-409-3p	0.998596	1	4.32661	2	MAP1A	BAK1
ACUGUUU	hsa-miR-452-5p/hsa-miR-4676-3p/hsa-miR-892c-3p	0.99928	1	4.6826	2	WNT4	NAT8L
AGCUUAU	hsa-miR-21-5p/hsa-miR-590-5p	0.999758	1	5.25765	2	GLIS2	SLC2A4RG
AUCAUUC	hsa-miR-382-3p	0.995618	1	3.71048	2	LIMD2	RPL36A-HNRNPH2
AUCCCUU	hsa-miR-188-5p/hsa-miR-6866-3p	0.983825	1	2.98481	2	NFIC	MAPK8IP2
AUGCCUU	hsa-miR-532-5p	0.992043	1	3.38187	2	G6PC3	CAMK2N1
AUGUAAC	hsa-miR-379-3p/hsa-miR-411-3p	0.998364	1	4.24446	2	NME3	PRR7
CAGUAAC	hsa-miR-802	0.999799	1	5.35349	2	UBE2M	TMEM129
CCGAGCC	hsa-miR-615-3p	0.0620824	1	0.205377	2	LRRC73	IGF2
CGUACCG	hsa-miR-126-3p.1	0.178013	1	0.38337	2	EGFL7	BAK1
CUCUAGC	hsa-miR-1251-5p	0.82361	1	1.56087	2	FAM83F	NFIC
CUGGACU	hsa-miR-378a-3p/hsa-miR-378b/hsa-miR-378c/hsa-miR-378d/hsa-miR-378e/hsa-miR-378f/hsa-miR-378h/hsa-miR-378i/hsa-miR-422a	0.985673	1	3.05327	2	FAM83F	ATG2A
GAUAUGU	hsa-miR-190a-5p/hsa-miR-190b	0.985673	1	3.05327	2	CEBPA	NUCKS1
GAUCAGA	hsa-miR-383-5p.1	0.990999	1	3.31342	2	RASL10B	RPL36A-HNRNPH2
GGACGGA	hsa-miR-184	0.187941	1	0.397062	2	ALDH4A1	NFIC
GGUUUAC	hsa-miR-299-5p	0.996504	1	3.8337	2	FOXP4	CDHR5
GUCUGCC	hsa-miR-346	0.97123	1	2.65621	2	LIMD2	RNASEH2C
UAAUGCU	hsa-miR-155-5p	0.999998	1	7.61264	2	UQCR11	PSKH1
UCAUACA	hsa-miR-485-3p/hsa-miR-539-3p	0.999953	1	6.10654	2	GPC1	BBX
UGAAAGG	hsa-miR-488-3p	0.999943	1	6.0107	2	CIB2	FAM83F
[truncated: 32 more columns]
