# Supplementary material for: Glucose-dependent miR-125b is a negative regulator of β-cell function
Source: bioRxiv preprint, doi:10.1101/2021.05.17.444559, version 3 (2022-03-09)
Supplement: Sup_Table5 [file 444559_file07.xlsx]

## Sheet: UpReg_genes
Supplemental Table 5. Genes up-regulated (padj <0.1, baseMean >100 RPKM) in MIR125B-Tg versus control islets
Gene.stable.ID.version	baseMean	log2FoldChange	lfcSE	stat	pvalue	padj	Gene.stable.ID	Gene.name
ENSMUSG00000022892.11	8851.09	0.493706	0.132698	3.72052	0.00019881	0.00943554	ENSMUSG00000022892	App
ENSMUSG00000043384.15	7789.22	0.79337	0.183288	4.32856	1.5e-05	0.00138141	ENSMUSG00000043384	Gprasp1
ENSMUSG00000018340.13	4495.01	0.346737	0.115111	3.01219	0.00259367	0.0584476	ENSMUSG00000018340	Anxa6
ENSMUSG00000026628.13	4286.13	0.625054	0.222397	2.81054	0.00494592	0.0906092	ENSMUSG00000026628	Atf3
ENSMUSG00000031996.17	3773.89	0.454165	0.15798	2.87483	0.00404249	0.0788655	ENSMUSG00000031996	Aplp2
ENSMUSG00000025203.6	3383.43	0.519836	0.11511	4.516	6.3e-06	0.000721568	ENSMUSG00000025203	Scd2
ENSMUSG00000037706.17	3321.52	0.604405	0.143051	4.2251	2.39e-05	0.00190075	ENSMUSG00000037706	Cd81
ENSMUSG00000034993.7	3099.74	0.427804	0.14351	2.981	0.00287309	0.0620294	ENSMUSG00000034993	Vat1
ENSMUSG00000002980.14	2705.96	0.890701	0.299588	2.97308	0.00294823	0.0632242	ENSMUSG00000002980	Bcam
ENSMUSG00000022636.13	2552.04	0.751045	0.201889	3.72009	0.000199149	0.00943554	ENSMUSG00000022636	Alcam
ENSMUSG00000051359.15	2549.88	0.661997	0.174663	3.79014	0.00015056	0.00767688	ENSMUSG00000051359	Ncald
ENSMUSG00000052459.13	2493.12	0.423969	0.144013	2.94396	0.00324047	0.067998	ENSMUSG00000052459	Atp6v1a
ENSMUSG00000046844.6	2489.74	0.765707	0.190482	4.01983	5.82e-05	0.00391713	ENSMUSG00000046844	Vat1l
ENSMUSG00000072966.11	2450.02	0.627332	0.129997	4.82575	1.39e-06	0.000237261	ENSMUSG00000072966	Gprasp2
ENSMUSG00000023224.12	2442.35	0.617403	0.203355	3.03609	0.00239668	0.0550806	ENSMUSG00000023224	Serping1
ENSMUSG00000026421.14	2408.54	0.689017	0.23441	2.93936	0.00328888	0.0687661	ENSMUSG00000026421	Csrp1
ENSMUSG00000017466.9	2344.79	0.646406	0.22125	2.92162	0.00348221	0.0708823	ENSMUSG00000017466	Timp2
ENSMUSG00000015405.15	2287.52	0.737014	0.255218	2.88779	0.00387961	0.0768353	ENSMUSG00000015405	Ace2
ENSMUSG00000018411.17	2262.75	0.724127	0.16388	4.41864	9.93e-06	0.00102171	ENSMUSG00000018411	Mapt
ENSMUSG00000045573.9	2247.6	5.80271	0.814107	7.12771	1.02e-12	7.27e-10	ENSMUSG00000045573	Penk
ENSMUSG00000022565.15	2205.1	0.776415	0.242238	3.20517	0.00134984	0.0367263	ENSMUSG00000022565	Plec
ENSMUSG00000026764.15	2180.98	0.941767	0.235246	4.00333	6.25e-05	0.00407255	ENSMUSG00000026764	Kif5c
ENSMUSG00000031451.6	2066.99	1.03584	0.356767	2.90342	0.00369108	0.0737295	ENSMUSG00000031451	Gas6
ENSMUSG00000032479.15	2015.62	0.654796	0.153765	4.25843	2.06e-05	0.00172178	ENSMUSG00000032479	Map4
ENSMUSG00000028222.2	1835.78	1.52357	0.189282	8.04922	8.33e-16	1.23e-12	ENSMUSG00000028222	Calb1
ENSMUSG00000035964.8	1820.59	1.05482	0.257857	4.0907	4.3e-05	0.00311004	ENSMUSG00000035964	Tmem59l
ENSMUSG00000022822.16	1802.74	0.537055	0.171156	3.13782	0.00170209	0.0438306	ENSMUSG00000022822	Abcc5
ENSMUSG00000038503.15	1779.59	0.585357	0.182777	3.20257	0.00136209	0.0369029	ENSMUSG00000038503	Mesd
ENSMUSG00000070047.14	1775.98	0.842285	0.286116	2.94385	0.00324153	0.067998	ENSMUSG00000070047	Fat1
ENSMUSG00000029121.16	1734.13	1.99499	0.165871	12.0274	2.55e-33	1.23e-29	ENSMUSG00000029121	Crmp1
ENSMUSG00000062380.4	1643.61	1.13411	0.279821	4.05298	5.06e-05	0.00353531	ENSMUSG00000062380	Tubb3
ENSMUSG00000049313.8	1640.33	0.657603	0.188591	3.48692	0.000488619	0.0183935	ENSMUSG00000049313	Sorl1
ENSMUSG00000001507.16	1638.02	0.638899	0.158016	4.04326	5.27e-05	0.00364619	ENSMUSG00000001507	Itga3
ENSMUSG00000014329.14	1601.67	0.86197	0.247472	3.4831	0.000495638	0.0185488	ENSMUSG00000014329	Bicc1
ENSMUSG00000027674.16	1584.96	0.478117	0.116151	4.11632	3.85e-05	0.00288138	ENSMUSG00000027674	Pex5l
ENSMUSG00000076441.9	1533.9	1.02656	0.327791	3.13174	0.00173775	0.0443923	ENSMUSG00000076441	Ass1
ENSMUSG00000041936.18	1509.6	1.01914	0.277137	3.67739	0.000235631	0.0105617	ENSMUSG00000041936	Agrn
ENSMUSG00000058488.7	1501.71	1.48214	0.290655	5.0993	3.41e-07	7.63e-05	ENSMUSG00000058488	Kl
ENSMUSG00000004936.8	1495.13	0.349285	0.107037	3.26323	0.00110151	0.0319588	ENSMUSG00000004936	Map2k1
ENSMUSG00000021136.13	1490.66	3.04021	0.220581	13.7827	3.24e-43	3.11e-39	ENSMUSG00000021136	Smoc1
ENSMUSG00000020176.17	1482.04	0.597678	0.177673	3.36392	0.000768445	0.0250115	ENSMUSG00000020176	Grb10
ENSMUSG00000040659.3	1481.71	0.475216	0.155637	3.05337	0.00226287	0.0532983	ENSMUSG00000040659	Efhd2
ENSMUSG00000029761.16	1465.03	0.737811	0.221553	3.33018	0.000867894	0.0268728	ENSMUSG00000029761	Cald1
ENSMUSG00000016349.10	1433.06	0.853051	0.284645	2.9969	0.00272744	0.060544	ENSMUSG00000016349	Eef1a2
ENSMUSG00000001098.15	1325.59	0.435178	0.153235	2.83993	0.00451231	0.0856004	ENSMUSG00000001098	Kctd10
ENSMUSG00000036564.17	1322.63	0.877349	0.274304	3.19846	0.00138164	0.0372231	ENSMUSG00000036564	Ndrg4
ENSMUSG00000038530.11	1307.9	0.654258	0.215668	3.03363	0.00241628	0.0553988	ENSMUSG00000038530	Rgs4
ENSMUSG00000037820.15	1284.29	1.04693	0.319207	3.2798	0.00103879	0.0304607	ENSMUSG00000037820	Tgm2
ENSMUSG00000049327.17	1200.29	0.406597	0.134174	3.03036	0.0024426	0.0558689	ENSMUSG00000049327	Kmt5a
ENSMUSG00000021087.18	1194.41	0.961166	0.344943	2.78645	0.00532883	0.0957101	ENSMUSG00000021087	Rtn1
ENSMUSG00000028195.4	1179.21	0.845922	0.292351	2.89351	0.0038096	0.0757039	ENSMUSG00000028195	Ccn1
ENSMUSG00000035776.14	1173.76	0.487719	0.155944	3.12753	0.00176279	0.0448394	ENSMUSG00000035776	Cd99l2
ENSMUSG00000031906.9	1136.96	0.702066	0.190128	3.69259	0.000221985	0.0102156	ENSMUSG00000031906	Smpd3
ENSMUSG00000001911.16	1135.82	0.542652	0.186847	2.90425	0.00368128	0.0736103	ENSMUSG00000001911	Nfix
ENSMUSG00000031227.8	1098.46	0.582443	0.133344	4.36796	1.25e-05	0.00122461	ENSMUSG00000031227	Magee1
ENSMUSG00000020900.15	1089.56	0.679805	0.183159	3.71157	0.000205981	0.00961709	ENSMUSG00000020900	Myh10
ENSMUSG00000004044.9	1082.92	0.777492	0.267862	2.90259	0.00370094	0.0737734	ENSMUSG00000004044	Cavin1
ENSMUSG00000032418.15	1048.41	0.829681	0.238149	3.48388	0.000494203	0.0185312	ENSMUSG00000032418	Me1
ENSMUSG00000019539.11	1013.21	0.702504	0.207777	3.38105	0.000722088	0.0240313	ENSMUSG00000019539	Rcn3
ENSMUSG00000031066.10	1006.43	0.753958	0.134069	5.62366	1.87e-08	5.9e-06	ENSMUSG00000031066	Usp11
ENSMUSG00000033059.7	1006.17	1.1355	0.224623	5.05513	4.3e-07	9.3e-05	ENSMUSG00000033059	Pygb
ENSMUSG00000045672.15	1005.12	1.82205	0.222651	8.18343	2.76e-16	5.31e-13	ENSMUSG00000045672	Col27a1
ENSMUSG00000036098.15	985.634	0.989898	0.264762	3.73882	0.000184889	0.00895849	ENSMUSG00000036098	Myrf
ENSMUSG00000022261.6	972.954	0.614589	0.168149	3.65504	0.000257146	0.0111711	ENSMUSG00000022261	Sdc2
ENSMUSG00000030701.17	961.546	0.661335	0.179242	3.68962	0.000224585	0.0102704	ENSMUSG00000030701	Plekhb1
ENSMUSG00000023067.14	930.006	0.961822	0.194226	4.95207	7.34e-07	0.000142674	ENSMUSG00000023067	Cdkn1a
ENSMUSG00000016382.15	925.673	1.03098	0.200787	5.13472	2.83e-07	6.47e-05	ENSMUSG00000016382	Pls3
ENSMUSG00000025017.10	921.132	0.967731	0.253223	3.82165	0.000132562	0.00703788	ENSMUSG00000025017	Pik3ap1
ENSMUSG00000024665.8	914.52	0.692743	0.20807	3.32937	0.000870435	0.0268759	ENSMUSG00000024665	Fads2
ENSMUSG00000034282.3	910.056	1.18439	0.255329	4.63868	3.51e-06	0.000474986	ENSMUSG00000034282	Evpl
ENSMUSG00000015647.9	909.52	1.1893	0.385075	3.08849	0.00201175	0.0493596	ENSMUSG00000015647	Lama5
ENSMUSG00000022842.18	901.859	0.943866	0.200605	4.7051	2.54e-06	0.000372586	ENSMUSG00000022842	Ece2
ENSMUSG00000031790.8	901.611	1.00123	0.270095	3.70695	0.000209769	0.00977026	ENSMUSG00000031790	Mmp15
ENSMUSG00000024486.6	873.683	0.898677	0.26399	3.40421	0.000663557	0.0226851	ENSMUSG00000024486	Hbegf
ENSMUSG00000048978.14	871.941	1.08636	0.367531	2.95583	0.00311834	0.0662153	ENSMUSG00000048978	Nrsn1
ENSMUSG00000000325.16	867.425	0.50046	0.13206	3.78966	0.000150856	0.00767688	ENSMUSG00000000325	Arvcf
ENSMUSG00000032038.7	848.509	1.10007	0.372459	2.95354	0.00314148	0.0662605	ENSMUSG00000032038	St3gal4
ENSMUSG00000008575.17	847.848	0.790457	0.250363	3.15725	0.00159267	0.0416825	ENSMUSG00000008575	Nfib
ENSMUSG00000018865.9	806.316	0.997583	0.258629	3.8572	0.000114694	0.00637648	ENSMUSG00000018865	Sult4a1
ENSMUSG00000040111.17	802.865	0.497883	0.179624	2.7718	0.00557476	0.0986532	ENSMUSG00000040111	Gramd1b
ENSMUSG00000034981.9	802.794	0.821467	0.236554	3.47265	0.000515354	0.0191747	ENSMUSG00000034981	Parm1
ENSMUSG00000013236.17	793.039	0.782937	0.270867	2.89049	0.00384642	0.076278	ENSMUSG00000013236	Ptprs
ENSMUSG00000052911.9	769.173	0.999195	0.238309	4.19286	2.75e-05	0.00214522	ENSMUSG00000052911	Lamb2
ENSMUSG00000041598.7	766.735	0.379932	0.128093	2.96605	0.00301648	0.0644723	ENSMUSG00000041598	Cdc42ep4
ENSMUSG00000023328.14	763.556	0.975632	0.294692	3.31068	0.000930684	0.0284169	ENSMUSG00000023328	Ache
ENSMUSG00000018849.6	761.105	1.08634	0.248446	4.37253	1.23e-05	0.00120537	ENSMUSG00000018849	Wwc1
ENSMUSG00000028273.15	752.692	0.70531	0.226242	3.1175	0.00182391	0.0456563	ENSMUSG00000028273	Pdlim5
ENSMUSG00000026185.8	746.817	0.996645	0.254497	3.91614	9e-05	0.00534397	ENSMUSG00000026185	Igfbp5
ENSMUSG00000038370.6	736.083	1.46756	0.19375	7.5745	3.61e-14	3.15e-11	ENSMUSG00000038370	Pcp4l1
ENSMUSG00000049521.2	732.385	0.844277	0.257406	3.27995	0.00103826	0.0304607	ENSMUSG00000049521	Cdc42ep1
ENSMUSG00000039405.7	726.219	0.870143	0.232855	3.73684	0.000186347	0.00900648	ENSMUSG00000039405	Prss23
ENSMUSG00000021340.13	703.542	0.99574	0.215911	4.6118	3.99e-06	0.000522759	ENSMUSG00000021340	Gpld1
ENSMUSG00000054252.18	703.473	1.45531	0.447258	3.25384	0.00113855	0.0326882	ENSMUSG00000054252	Fgfr3
ENSMUSG00000041548.4	684.278	1.18758	0.193877	6.12541	9.05e-10	4.24e-07	ENSMUSG00000041548	Hspb8
ENSMUSG00000012350.15	673.431	1.44642	0.317646	4.55357	5.27e-06	0.000642137	ENSMUSG00000012350	Ehf
ENSMUSG00000039252.11	671.969	1.09913	0.19782	5.55623	2.76e-08	8.36e-06	ENSMUSG00000039252	Lgi2
ENSMUSG00000035863.14	670.33	0.765259	0.192353	3.97841	6.94e-05	0.00440447	ENSMUSG00000035863	Palm
ENSMUSG00000027875.12	659.305	1.04295	0.285096	3.65824	0.000253953	0.0111024	ENSMUSG00000027875	Hmgcs2
ENSMUSG00000042734.6	630.435	0.612524	0.212944	2.87646	0.00402166	0.0786185	ENSMUSG00000042734	Ttc9
ENSMUSG00000037012.18	610.246	1.09383	0.299684	3.64994	0.000262303	0.0113285	ENSMUSG00000037012	Hk1
ENSMUSG00000036815.17	598.593	1.27631	0.308432	4.13806	3.5e-05	0.00268432	ENSMUSG00000036815	Dpp10
ENSMUSG00000048537.16	595.12	0.503662	0.177823	2.83238	0.00462032	0.0867088	ENSMUSG00000048537	Phldb1
ENSMUSG00000051675.13	592.681	0.35945	0.119352	3.01168	0.00259802	0.0584509	ENSMUSG00000051675	Trim32
ENSMUSG00000030849.18	587.261	1.62603	0.503774	3.22769	0.00124792	0.0349419	ENSMUSG00000030849	Fgfr2
ENSMUSG00000039457.4	582.693	0.802318	0.194653	4.12177	3.76e-05	0.00283611	ENSMUSG00000039457	Ppl
ENSMUSG00000031714.9	582.621	0.642265	0.192143	3.34265	0.000829827	0.0262071	ENSMUSG00000031714	Gab1
ENSMUSG00000034463.4	574.329	1.46519	0.437851	3.34633	0.000818883	0.0260795	ENSMUSG00000034463	Scara3
ENSMUSG00000032220.10	567.677	0.751354	0.22788	3.29715	0.000976724	0.0291291	ENSMUSG00000032220	Myo1e
ENSMUSG00000047281.3	553.859	1.24564	0.39928	3.11971	0.0018103	0.0455203	ENSMUSG00000047281	Sfn
ENSMUSG00000043760.16	552.45	0.916972	0.284958	3.21792	0.00129124	0.0357184	ENSMUSG00000043760	Pkhd1
ENSMUSG00000022505.9	545.572	0.772009	0.2339	3.3006	0.000964789	0.0289979	ENSMUSG00000022505	Emp2
ENSMUSG00000027993.16	535.256	0.35312	0.117354	3.00903	0.00262087	0.0588937	ENSMUSG00000027993	Trim2
ENSMUSG00000018909.15	531.018	0.968586	0.323543	2.99369	0.0027563	0.0608727	ENSMUSG00000018909	Arrb1
ENSMUSG00000021097.15	524.212	1.16663	0.272786	4.27674	1.9e-05	0.00164332	ENSMUSG00000021097	Clmn
ENSMUSG00000003617.16	523.766	1.23025	0.369311	3.33119	0.000864747	0.0268295	ENSMUSG00000003617	Cp
ENSMUSG00000031853.5	522.597	0.696893	0.237972	2.92847	0.00340634	0.0700658	ENSMUSG00000031853	Map3k21
ENSMUSG00000019876.15	520.351	0.792783	0.243284	3.25867	0.00111936	0.0322336	ENSMUSG00000019876	Pkib
ENSMUSG00000049866.12	518.202	0.733311	0.229852	3.19036	0.00142095	0.0380158	ENSMUSG00000049866	Arl4c
ENSMUSG00000001435.15	516.284	1.38803	0.327603	4.23692	2.27e-05	0.00183928	ENSMUSG00000001435	Col18a1
ENSMUSG00000021700.10	512.215	0.896307	0.20237	4.42906	9.46e-06	0.000978831	ENSMUSG00000021700	Rab3c
ENSMUSG00000027254.13	511.56	1.51109	0.335705	4.50124	6.76e-06	0.000759957	ENSMUSG00000027254	Map1a
ENSMUSG00000027878.11	509.511	1.01366	0.324698	3.12184	0.00179727	0.0453706	ENSMUSG00000027878	Notch2
ENSMUSG00000034684.12	496.545	0.683526	0.233913	2.92214	0.00347635	0.0708823	ENSMUSG00000034684	Sema3f
ENSMUSG00000020592.14	494.128	1.12961	0.336352	3.35842	0.00078388	0.025385	ENSMUSG00000020592	Sdc1
ENSMUSG00000033419.16	492.962	0.642654	0.172624	3.72285	0.00019699	0.00940272	ENSMUSG00000033419	Snap91
ENSMUSG00000045763.8	489.277	0.929802	0.193932	4.79447	1.63e-06	0.000259297	ENSMUSG00000045763	Basp1
ENSMUSG00000037788.14	487.846	0.822106	0.188863	4.35292	1.34e-05	0.00129204	ENSMUSG00000037788	Vopp1
ENSMUSG00000029710.15	484.672	0.776445	0.189292	4.10183	4.1e-05	0.00302498	ENSMUSG00000029710	Ephb4
ENSMUSG00000050357.9	479.234	0.538723	0.182292	2.95528	0.00312383	0.0662153	ENSMUSG00000050357	Carmil2
ENSMUSG00000031285.14	472.36	1.4429	0.181185	7.96368	1.67e-15	2.14e-12	ENSMUSG00000031285	Dcx
ENSMUSG00000030203.17	471.745	0.591588	0.201081	2.94204	0.00326059	0.0683232	ENSMUSG00000030203	Dusp16
ENSMUSG00000027695.16	471.422	0.927293	0.320099	2.8969	0.00376874	0.075047	ENSMUSG00000027695	Pld1
ENSMUSG00000056515.9	467.244	0.61237	0.157792	3.88088	0.000104081	0.00592634	ENSMUSG00000056515	Rab31
ENSMUSG00000074657.5	463.842	1.17852	0.270972	4.34923	1.37e-05	0.0013045	ENSMUSG00000074657	Kif5a
ENSMUSG00000030089.15	462.447	1.05339	0.346496	3.04012	0.00236484	0.05461	ENSMUSG00000030089	Slc41a3
ENSMUSG00000031075.19	459.66	1.2691	0.244223	5.1965	2.03e-07	5.14e-05	ENSMUSG00000031075	Ano1
ENSMUSG00000040703.11	459.183	1.30727	0.43749	2.98812	0.00280701	0.0614162	ENSMUSG00000040703	Cyp2s1
ENSMUSG00000039556.16	456.065	0.834039	0.257751	3.23583	0.0012129	0.0343614	ENSMUSG00000039556	Ppp1r3f
ENSMUSG00000023827.8	447.753	0.94859	0.205372	4.61889	3.86e-06	0.000511804	ENSMUSG00000023827	Agpat4
ENSMUSG00000048078.16	443.007	0.677235	0.209516	3.23238	0.00122765	0.0345754	ENSMUSG00000048078	Tenm4
ENSMUSG00000027797.15	436.631	1.11111	0.316748	3.50787	0.000451708	0.0173592	ENSMUSG00000027797	Dclk1
ENSMUSG00000037972.7	434.901	0.69522	0.216401	3.21265	0.00131515	0.0360374	ENSMUSG00000037972	Snn
ENSMUSG00000099032.2	429.602	1.73252	0.28748	6.02657	1.67e-09	7.32e-07	ENSMUSG00000099032	Tcf24
ENSMUSG00000048612.16	418.625	1.02297	0.340572	3.00368	0.00266737	0.0596623	ENSMUSG00000048612	Myof
ENSMUSG00000021613.9	418.254	1.01086	0.280174	3.60797	0.000308599	0.0129048	ENSMUSG00000021613	Hapln1
ENSMUSG00000033170.14	415.092	1.3658	0.269121	5.07504	3.87e-07	8.57e-05	ENSMUSG00000033170	Card10
ENSMUSG00000007783.10	413.914	0.469481	0.153802	3.05249	0.00226949	0.053304	ENSMUSG00000007783	Cpt1c
ENSMUSG00000009545.14	413.021	1.07711	0.242974	4.43302	9.29e-06	0.000971436	ENSMUSG00000009545	Kcnq1
ENSMUSG00000038740.9	410.094	1.02604	0.149519	6.8623	6.78e-12	4.2e-09	ENSMUSG00000038740	Mvb12b
ENSMUSG00000000957.11	409.788	1.04896	0.261134	4.01695	5.9e-05	0.0039262	ENSMUSG00000000957	Mmp14
ENSMUSG00000057286.6	404.499	0.973625	0.237733	4.09545	4.21e-05	0.00307014	ENSMUSG00000057286	St6galnac2
ENSMUSG00000054342.8	404.178	1.10095	0.308193	3.57229	0.000353867	0.0144522	ENSMUSG00000054342	Kcnn4
ENSMUSG00000024642.17	401.792	0.639106	0.189531	3.37204	0.000746144	0.0245348	ENSMUSG00000024642	Tle4
ENSMUSG00000002808.7	401.297	0.83414	0.238155	3.5025	0.00046091	0.0175914	ENSMUSG00000002808	Epdr1
ENSMUSG00000040170.13	401.164	1.23416	0.277485	4.44765	8.68e-06	0.000927744	ENSMUSG00000040170	Fmo2
ENSMUSG00000078853.8	400.525	0.758361	0.199791	3.79578	0.000147179	0.00763109	ENSMUSG00000078853	Igtp
ENSMUSG00000029361.18	395.197	1.71493	0.424226	4.0425	5.29e-05	0.00364619	ENSMUSG00000029361	Nos1
ENSMUSG00000036641.9	391.365	0.700224	0.251722	2.78173	0.00540692	0.0966613	ENSMUSG00000036641	Ccdc148
ENSMUSG00000036198.12	390.749	3.34432	0.293119	11.4094	3.75e-30	1.44e-26	ENSMUSG00000036198	Arhgap36
ENSMUSG00000021253.7	380.979	1.5482	0.358397	4.3198	1.56e-05	0.00141039	ENSMUSG00000021253	Tgfb3
ENSMUSG00000033068.16	379.769	0.398709	0.127462	3.12807	0.00175956	0.0448302	ENSMUSG00000033068	Entpd6
ENSMUSG00000045991.19	377.071	1.79021	0.412337	4.34161	1.41e-05	0.00132079	ENSMUSG00000045991	Onecut2
ENSMUSG00000040856.17	376.795	1.91707	0.464961	4.12309	3.74e-05	0.00283108	ENSMUSG00000040856	Dlk1
ENSMUSG00000028005.13	372.52	0.73594	0.145176	5.0693	3.99e-07	8.73e-05	ENSMUSG00000028005	Gucy1b1
ENSMUSG00000024501.20	367.284	1.53688	0.422443	3.63807	0.000274684	0.0117418	ENSMUSG00000024501	Dpysl3
ENSMUSG00000028780.13	366.739	1.01032	0.265347	3.80754	0.000140355	0.00735658	ENSMUSG00000028780	Sema3c
ENSMUSG00000030956.15	366.614	0.712663	0.21238	3.35561	0.000791905	0.0255904	ENSMUSG00000030956	Fam53b
ENSMUSG00000026249.10	366.472	0.746196	0.219093	3.40585	0.000659593	0.022657	ENSMUSG00000026249	Serpine2
ENSMUSG00000030551.14	366.221	0.98583	0.219588	4.48945	7.14e-06	0.000785817	ENSMUSG00000030551	Nr2f2
ENSMUSG00000041992.9	360.333	1.05243	0.309273	3.40293	0.000666679	0.022738	ENSMUSG00000041992	Rapgef5
ENSMUSG00000051439.7	357.531	1.25331	0.39719	3.15545	0.00160252	0.0417698	ENSMUSG00000051439	Cd14
ENSMUSG00000014444.17	357.304	0.972778	0.341054	2.85227	0.00434083	0.0832505	ENSMUSG00000014444	Piezo1
ENSMUSG00000018166.8	354.864	0.881961	0.259092	3.40405	0.000663949	0.0226851	ENSMUSG00000018166	Erbb3
ENSMUSG00000035864.14	343.679	1.38109	0.343827	4.01683	5.9e-05	0.0039262	ENSMUSG00000035864	Syt1
ENSMUSG00000023147.17	343.304	0.447975	0.129865	3.44955	0.00056152	0.0202653	ENSMUSG00000023147	Get1
ENSMUSG00000036390.8	339.743	0.532131	0.158596	3.35527	0.000792882	0.0255904	ENSMUSG00000036390	Gadd45a
ENSMUSG00000050953.10	338.726	0.774204	0.234189	3.30589	0.000946748	0.0287704	ENSMUSG00000050953	Gja1
ENSMUSG00000010080.15	331.946	1.42293	0.491748	2.89362	0.00380835	0.0757039	ENSMUSG00000010080	Epn3
ENSMUSG00000000567.5	326.821	1.0449	0.341033	3.06392	0.00218459	0.0522671	ENSMUSG00000000567	Sox9
ENSMUSG00000062312.5	324.72	1.30102	0.414969	3.13522	0.00171725	0.0441029	ENSMUSG00000062312	Erbb2
ENSMUSG00000069874.7	323.807	0.638184	0.204471	3.12115	0.00180147	0.0454168	ENSMUSG00000069874	Irgm2
ENSMUSG00000044628.5	322.099	0.639638	0.186313	3.43314	0.000596625	0.0212488	ENSMUSG00000044628	Rnf208
ENSMUSG00000062661.6	319.717	1.15071	0.259801	4.42921	9.46e-06	0.000978831	ENSMUSG00000062661	Ncs1
ENSMUSG00000030711.16	317.222	1.33165	0.362873	3.66975	0.000242792	0.0107331	ENSMUSG00000030711	Sult1a1
ENSMUSG00000037211.12	316.566	0.628236	0.194931	3.22287	0.00126912	0.0353402	ENSMUSG00000037211	Spry1
ENSMUSG00000047230.6	314.383	1.28458	0.323318	3.97312	7.09e-05	0.00445935	ENSMUSG00000047230	Cldn2
ENSMUSG00000032402.12	313.726	0.753605	0.225203	3.34633	0.000818881	0.0260795	ENSMUSG00000032402	Smad3
ENSMUSG00000036699.12	311.086	0.924643	0.270943	3.41269	0.000643258	0.0223867	ENSMUSG00000036699	Zcchc12
ENSMUSG00000022594.14	310.411	1.15059	0.360005	3.19603	0.00139333	0.0374855	ENSMUSG00000022594	Lynx1
ENSMUSG00000030621.17	307.827	1.04883	0.246986	4.24654	2.17e-05	0.00177736	ENSMUSG00000030621	Me3
ENSMUSG00000031877.9	302.021	1.32132	0.381129	3.46686	0.000526581	0.0194421	ENSMUSG00000031877	Ces2g
ENSMUSG00000028626.5	301.521	1.36023	0.230717	5.89565	3.73e-09	1.5e-06	ENSMUSG00000028626	Col9a2
ENSMUSG00000024074.8	297.91	1.00346	0.254938	3.93608	8.28e-05	0.00507376	ENSMUSG00000024074	Crim1
ENSMUSG00000002489.16	294.41	1.43173	0.30794	4.64938	3.33e-06	0.00046408	ENSMUSG00000002489	Tiam1
ENSMUSG00000031925.17	291.537	0.928807	0.151619	6.12594	9.02e-10	4.24e-07	ENSMUSG00000031925	Maml2
ENSMUSG00000026604.17	291.263	1.06389	0.257233	4.13592	3.54e-05	0.00269865	ENSMUSG00000026604	Ptpn14
ENSMUSG00000052539.15	286.367	1.01547	0.247614	4.10101	4.11e-05	0.00302498	ENSMUSG00000052539	Magi3
ENSMUSG00000026639.18	286.242	0.618034	0.220363	2.80462	0.00503756	0.0917638	ENSMUSG00000026639	Lamb3
ENSMUSG00000051652.4	283.411	0.970633	0.333858	2.90732	0.00364538	0.0731205	ENSMUSG00000051652	Lrrc3
ENSMUSG00000056569.11	277.449	0.688625	0.213642	3.22326	0.0012674	0.0353402	ENSMUSG00000056569	Mpz
ENSMUSG00000031355.16	275.669	1.56871	0.237391	6.60812	3.89e-11	2.14e-08	ENSMUSG00000031355	Arhgap6
ENSMUSG00000025272.16	274.283	1.28861	0.286123	4.50369	6.68e-06	0.000755661	ENSMUSG00000025272	Tro
ENSMUSG00000023905.15	273.353	0.784784	0.172906	4.53878	5.66e-06	0.00067019	ENSMUSG00000023905	Tnfrsf12a
ENSMUSG00000060572.17	273.002	1.54857	0.286862	5.39833	6.73e-08	1.9e-05	ENSMUSG00000060572	Mfap2
ENSMUSG00000027777.15	271.22	0.599976	0.212205	2.82734	0.00469361	0.0874867	ENSMUSG00000027777	Schip1
ENSMUSG00000036782.13	270.369	0.917265	0.261797	3.50373	0.000458791	0.0175453	ENSMUSG00000036782	Klhl13
ENSMUSG00000041025.15	270.056	0.841986	0.220156	3.8245	0.000131037	0.00698234	ENSMUSG00000041025	Iffo2
ENSMUSG00000044312.4	267.349	1.24381	0.322708	3.85428	0.000116073	0.00640452	ENSMUSG00000044312	Neurog3
ENSMUSG00000027803.14	266.246	0.855725	0.232618	3.67868	0.000234447	0.0105617	ENSMUSG00000027803	Wwtr1
ENSMUSG00000057969.15	265.945	1.07597	0.267267	4.02581	5.68e-05	0.00384583	ENSMUSG00000057969	Sema3b
ENSMUSG00000015217.11	265.219	0.90233	0.223108	4.04436	5.25e-05	0.00364342	ENSMUSG00000015217	Hmgb3
ENSMUSG00000022055.7	262.207	1.73657	0.515361	3.36962	0.000752711	0.0246607	ENSMUSG00000022055	Nefl
ENSMUSG00000058056.16	262.026	1.0153	0.279443	3.6333	0.000279823	0.0119086	ENSMUSG00000058056	Palld
ENSMUSG00000030077.11	261.638	1.62551	0.27587	5.89231	3.81e-09	1.5e-06	ENSMUSG00000030077	Chl1
ENSMUSG00000023348.11	261.133	0.785126	0.261235	3.00544	0.00265195	0.0593863	ENSMUSG00000023348	Trip6
ENSMUSG00000045348.16	260.973	0.59774	0.181355	3.29596	0.000980868	0.0292074	ENSMUSG00000045348	Nyap1
ENSMUSG00000000058.6	260.29	0.82528	0.247718	3.33153	0.000863705	0.0268295	ENSMUSG00000000058	Cav2
ENSMUSG00000042510.7	257.115	0.947857	0.339745	2.78991	0.00527226	0.0950488	ENSMUSG00000042510	AA986860
ENSMUSG00000022231.10	255.901	0.948849	0.285454	3.324	0.000887351	0.0273105	ENSMUSG00000022231	Sema5a
ENSMUSG00000000531.5	255.779	0.779849	0.164452	4.7421	2.12e-06	0.000318938	ENSMUSG00000000531	Grasp
ENSMUSG00000038456.9	255.769	0.719371	0.195851	3.67305	0.000239675	0.0106419	ENSMUSG00000038456	Dennd2a
ENSMUSG00000027864.9	255.201	0.842258	0.255341	3.29856	0.000971821	0.029073	ENSMUSG00000027864	Ptgfrn
ENSMUSG00000029120.10	254.579	0.892665	0.173243	5.15267	2.57e-07	6.17e-05	ENSMUSG00000029120	Ppp2r2c
ENSMUSG00000022099.17	253.918	1.0191	0.358822	2.84012	0.00450967	0.0856004	ENSMUSG00000022099	Dmtn
ENSMUSG00000038463.8	253.209	1.30676	0.164375	7.94989	1.87e-15	2.24e-12	ENSMUSG00000038463	Olfml2b
ENSMUSG00000032850.16	251.558	0.690377	0.185428	3.72316	0.000196747	0.00940272	ENSMUSG00000032850	Rnft2
ENSMUSG00000020684.14	251.24	1.80824	0.209976	8.61165	7.2e-18	1.73e-14	ENSMUSG00000020684	Rasl10b
ENSMUSG00000004383.18	250.313	0.633847	0.171554	3.69473	0.000220121	0.0101785	ENSMUSG00000004383	Large1
ENSMUSG00000036560.14	249.237	0.808039	0.26262	3.07683	0.00209212	0.0508774	ENSMUSG00000036560	Lgi4
ENSMUSG00000032269.8	245.566	1.28578	0.442913	2.90301	0.00369595	0.0737503	ENSMUSG00000032269	Htr3a
ENSMUSG00000047250.13	244.904	0.958885	0.241772	3.96608	7.31e-05	0.00451923	ENSMUSG00000047250	Ptgs1
ENSMUSG00000094910.1	242.751	0.858553	0.146804	5.84829	4.97e-09	1.87e-06	ENSMUSG00000094910	D430019H16Rik
ENSMUSG00000032224.15	242.113	0.466113	0.162025	2.87679	0.00401738	0.0786147	ENSMUSG00000032224	Fam81a
ENSMUSG00000040612.13	241.246	1.68236	0.459607	3.66044	0.000251779	0.0110324	ENSMUSG00000040612	Ildr2
ENSMUSG00000052852.8	241.056	1.23726	0.444771	2.78179	0.00540593	0.0966613	ENSMUSG00000052852	Reep1
ENSMUSG00000040907.15	240.516	1.27535	0.426808	2.9881	0.00280716	0.0614162	ENSMUSG00000040907	Atp1a3
ENSMUSG00000029778.12	239.567	1.37204	0.430292	3.18863	0.00142948	0.038191	ENSMUSG00000029778	Adcyap1r1
ENSMUSG00000072941.5	239.43	0.991807	0.334123	2.96839	0.00299365	0.0640554	ENSMUSG00000072941	Sod3
ENSMUSG00000063063.12	238.704	0.628858	0.201793	3.11636	0.00183098	0.0457413	ENSMUSG00000063063	Ctnna2
ENSMUSG00000074923.10	237.49	0.719325	0.190184	3.78226	0.00015541	0.00784011	ENSMUSG00000074923	Pak6
ENSMUSG00000034810.7	236.879	1.03297	0.359514	2.87323	0.00406295	0.0791308	ENSMUSG00000034810	Scn7a
ENSMUSG00000032334.10	236.603	0.984371	0.341035	2.88642	0.00389646	0.0769532	ENSMUSG00000032334	Loxl1
ENSMUSG00000048285.9	236.057	0.861316	0.188019	4.581	4.63e-06	0.000584754	ENSMUSG00000048285	Frmd6
ENSMUSG00000058248.12	235.543	0.682727	0.217516	3.13873	0.00169679	0.0438113	ENSMUSG00000058248	Kcnh1
ENSMUSG00000024664.5	234.755	1.0318	0.308294	3.34681	0.000817468	0.0260795	ENSMUSG00000024664	Fads3
ENSMUSG00000024421.16	234.659	0.920377	0.302513	3.04244	0.00234672	0.0543874	ENSMUSG00000024421	Lama3
ENSMUSG00000052951.5	233.037	0.757854	0.219943	3.44568	0.000569616	0.0204424	ENSMUSG00000052951	C130021I20Rik
ENSMUSG00000041801.5	232.798	0.896708	0.223424	4.01348	5.98e-05	0.00394504	ENSMUSG00000041801	Phlda3
ENSMUSG00000015970.19	232.738	1.21247	0.376175	3.22314	0.00126793	0.0353402	ENSMUSG00000015970	Chdh
ENSMUSG00000044288.6	232.274	1.04421	0.322937	3.23349	0.00122286	0.0344911	ENSMUSG00000044288	Cnr1
ENSMUSG00000047407.17	230.895	0.980717	0.334424	2.93255	0.00336188	0.0697618	ENSMUSG00000047407	Tgif1
ENSMUSG00000033377.14	230.697	1.0778	0.323363	3.33308	0.000858892	0.0268209	ENSMUSG00000033377	Palmd
ENSMUSG00000000627.15	229.505	1.01017	0.216634	4.66301	3.12e-06	0.000437673	ENSMUSG00000000627	Sema4f
ENSMUSG00000022178.11	228.153	1.01218	0.330128	3.06602	0.00216926	0.0520299	ENSMUSG00000022178	Ajuba
ENSMUSG00000001761.7	227.752	0.945643	0.280119	3.37586	0.000735841	0.0243625	ENSMUSG00000001761	Smo
ENSMUSG00000029168.14	223.822	1.55705	0.295354	5.27183	1.35e-07	3.56e-05	ENSMUSG00000029168	Dpysl5
ENSMUSG00000039239.14	222.142	1.08865	0.321468	3.3865	0.000707904	0.0237648	ENSMUSG00000039239	Tgfb2
ENSMUSG00000031342.17	217.516	0.963797	0.245907	3.91935	8.88e-05	0.00532874	ENSMUSG00000031342	Gpm6b
ENSMUSG00000024511.15	216.996	1.04992	0.341908	3.07078	0.00213504	0.0515759	ENSMUSG00000024511	Rab27b
ENSMUSG00000024998.17	216.818	1.08047	0.270861	3.98903	6.63e-05	0.00426816	ENSMUSG00000024998	Plce1
ENSMUSG00000019256.17	215.99	0.68286	0.195484	3.49317	0.000477321	0.0181099	ENSMUSG00000019256	Ahr
ENSMUSG00000001870.16	213.819	0.890228	0.254592	3.49668	0.00047109	0.0179443	ENSMUSG00000001870	Ltbp1
ENSMUSG00000026380.10	213.538	1.15528	0.314106	3.67801	0.000235061	0.0105617	ENSMUSG00000026380	Tfcp2l1
ENSMUSG00000059974.10	213.347	1.73059	0.349366	4.95351	7.29e-07	0.000142674	ENSMUSG00000059974	Ntm
ENSMUSG00000027356.8	212.972	1.35471	0.373967	3.62255	0.000291714	0.0123328	ENSMUSG00000027356	Fermt1
ENSMUSG00000022096.14	212.563	1.15578	0.284065	4.06873	4.73e-05	0.00334303	ENSMUSG00000022096	Hr
ENSMUSG00000023945.7	212.382	1.91604	0.439819	4.35644	1.32e-05	0.00127785	ENSMUSG00000023945	Slc5a7
ENSMUSG00000030257.16	211.563	0.717659	0.238152	3.01344	0.00258301	0.0583863	ENSMUSG00000030257	Srgap3
ENSMUSG00000054162.15	211.402	1.27965	0.262912	4.86721	1.13e-06	0.000200444	ENSMUSG00000054162	Spock3
ENSMUSG00000097789.2	211.192	1.01694	0.234473	4.3371	1.44e-05	0.00134163	ENSMUSG00000097789	Gm2115
ENSMUSG00000029757.16	209.926	1.03293	0.266034	3.88271	0.000103298	0.00591381	ENSMUSG00000029757	Dync1i1
ENSMUSG00000033383.6	208.743	1.47662	0.503056	2.93529	0.00333235	0.0693734	ENSMUSG00000033383	Rtp1
ENSMUSG00000078794.4	208.544	0.620324	0.169714	3.65511	0.000257071	0.0111711	ENSMUSG00000078794	Dact3
ENSMUSG00000040724.5	208.495	0.88066	0.225034	3.91346	9.1e-05	0.00538507	ENSMUSG00000040724	Kcna2
ENSMUSG00000025735.13	205.878	0.794851	0.27363	2.90484	0.0036744	0.0735493	ENSMUSG00000025735	Rhbdl1
ENSMUSG00000020848.7	205.855	1.57445	0.29598	5.31946	1.04e-07	2.86e-05	ENSMUSG00000020848	Doc2b
ENSMUSG00000036985.12	204.712	0.613565	0.204419	3.00151	0.00268641	0.0598792	ENSMUSG00000036985	Zdhhc9
ENSMUSG00000053963.7	203.463	1.86638	0.401937	4.64346	3.43e-06	0.000473708	ENSMUSG00000053963	Stum
ENSMUSG00000038168.5	202.825	1.65	0.242528	6.80335	1.02e-11	6.14e-09	ENSMUSG00000038168	P3h2
ENSMUSG00000006445.3	201.95	0.915374	0.280595	3.26226	0.00110526	0.0320137	ENSMUSG00000006445	Epha2
ENSMUSG00000048070.4	200.292	1.42404	0.500488	2.8453	0.00443692	0.0845873	ENSMUSG00000048070	Pirt
ENSMUSG00000028804.20	199.337	1.07123	0.232288	4.61165	3.99e-06	0.000522759	ENSMUSG00000028804	Csmd2
ENSMUSG00000046223.10	199.179	1.03114	0.366586	2.81282	0.00491095	0.0903127	ENSMUSG00000046223	Plaur
ENSMUSG00000041731.13	198.817	3.38488	0.277844	12.1827	3.85e-34	2.47e-30	ENSMUSG00000041731	Pgm5
ENSMUSG00000025964.15	198.783	1.00037	0.268511	3.72562	0.000194835	0.00936963	ENSMUSG00000025964	Adam23
ENSMUSG00000032006.15	196.682	0.96378	0.311909	3.08994	0.00200198	0.0491829	ENSMUSG00000032006	Pdgfd
ENSMUSG00000039116.7	195.923	1.43025	0.274129	5.21743	1.81e-07	4.72e-05	ENSMUSG00000039116	Adgrg6
ENSMUSG00000047793.13	193.805	1.1542	0.374742	3.07999	0.00207004	0.0504681	ENSMUSG00000047793	Sned1
ENSMUSG00000024558.12	193.226	1.52819	0.317493	4.81329	1.48e-06	0.000242019	ENSMUSG00000024558	Mapk4
ENSMUSG00000040511.14	192.51	0.82079	0.183975	4.46142	8.14e-06	0.000886182	ENSMUSG00000040511	Pvr
ENSMUSG00000015127.14	189.476	0.685443	0.209104	3.27799	0.00104547	0.0306099	ENSMUSG00000015127	Unkl
ENSMUSG00000015850.11	187.945	1.08206	0.268583	4.02879	5.61e-05	0.00381084	ENSMUSG00000015850	Adamtsl4
ENSMUSG00000039410.16	187.64	1.17957	0.291089	4.05226	5.07e-05	0.00353531	ENSMUSG00000039410	Prdm16
ENSMUSG00000027375.14	181.77	1.39482	0.414486	3.36519	0.000764916	0.0249388	ENSMUSG00000027375	Mal
ENSMUSG00000041390.18	180.788	0.808522	0.225682	3.58257	0.00034023	0.0139843	ENSMUSG00000041390	Mdfic
ENSMUSG00000095115.2	179.328	0.823847	0.285552	2.8851	0.00391285	0.0770394	ENSMUSG00000095115	Itpripl2
ENSMUSG00000115388.2	178.988	1.0219	0.293036	3.48728	0.000487959	0.0183935	ENSMUSG00000115388	Eppk1
ENSMUSG00000026432.7	178.825	0.861941	0.275013	3.13418	0.00172334	0.0441552	ENSMUSG00000026432	Avpr1b
ENSMUSG00000032724.5	178.018	1.1075	0.262002	4.22706	2.37e-05	0.00189767	ENSMUSG00000032724	Abtb2
ENSMUSG00000041577.5	175.686	1.21017	0.398586	3.03615	0.00239623	0.0550806	ENSMUSG00000041577	Prelp
ENSMUSG00000020607.7	175.551	1.15838	0.266753	4.34251	1.41e-05	0.00132079	ENSMUSG00000020607	Lratd1
ENSMUSG00000029122.11	175.263	1.23921	0.302198	4.10064	4.12e-05	0.00302498	ENSMUSG00000029122	Evc
ENSMUSG00000050967.5	172.154	0.698817	0.199063	3.51053	0.000447214	0.0172743	ENSMUSG00000050967	Creg2
ENSMUSG00000020057.2	171.885	1.04172	0.241638	4.31108	1.62e-05	0.00145349	ENSMUSG00000020057	Dram1
ENSMUSG00000040270.16	171.364	1.12819	0.404621	2.78827	0.00529899	0.0953633	ENSMUSG00000040270	Bach2
ENSMUSG00000039385.5	170.898	1.90313	0.466369	4.08074	4.49e-05	0.00320241	ENSMUSG00000039385	Cdh6
ENSMUSG00000084939.2	168.84	2.28612	0.57446	3.97959	6.9e-05	0.00439709	ENSMUSG00000084939	Gm830
ENSMUSG00000032261.16	167.975	0.652832	0.218561	2.98696	0.00281771	0.0615226	ENSMUSG00000032261	Sh3bgrl2
ENSMUSG00000028019.9	167.257	2.03999	0.412402	4.94659	7.55e-07	0.000145277	ENSMUSG00000028019	Pdgfc
ENSMUSG00000050271.12	166.706	0.980378	0.262033	3.74143	0.000182973	0.00888806	ENSMUSG00000050271	Prag1
ENSMUSG00000047414.6	165.765	1.414	0.305717	4.62521	3.74e-06	0.000499899	ENSMUSG00000047414	Flrt2
ENSMUSG00000020159.8	164.727	2.116	0.600412	3.52425	0.000424691	0.0166721	ENSMUSG00000020159	Gabrp
ENSMUSG00000040274.11	164.407	0.895249	0.305201	2.93331	0.00335371	0.0696673	ENSMUSG00000040274	Cdk6
ENSMUSG00000038077.7	164.089	1.10692	0.275102	4.02365	5.73e-05	0.00386764	ENSMUSG00000038077	Kcna6
ENSMUSG00000048022.11	163.676	1.10579	0.310133	3.56553	0.000363115	0.0146857	ENSMUSG00000048022	Tmem229a
ENSMUSG00000021062.15	163.386	0.940813	0.256999	3.66076	0.000251468	0.0110324	ENSMUSG00000021062	Rab15
ENSMUSG00000055116.8	162.53	1.08334	0.384394	2.81831	0.0048277	0.0892939	ENSMUSG00000055116	Arntl
ENSMUSG00000029838.11	161.693	1.15566	0.313426	3.68719	0.000226748	0.0103234	ENSMUSG00000029838	Ptn
ENSMUSG00000020135.13	160.666	0.974892	0.327105	2.98037	0.00287903	0.0620475	ENSMUSG00000020135	Apc2
ENSMUSG00000032033.11	159.474	1.95264	0.40284	4.84718	1.25e-06	0.000215077	ENSMUSG00000032033	Barx2
ENSMUSG00000058420.8	156.529	0.947464	0.280317	3.37997	0.000724948	0.0240709	ENSMUSG00000058420	Syt17
ENSMUSG00000032374.14	156.355	0.989684	0.348823	2.83721	0.00455098	0.0859104	ENSMUSG00000032374	Plod2
ENSMUSG00000023243.9	155.909	1.16407	0.366986	3.17198	0.00151406	0.0401277	ENSMUSG00000023243	Kcnk5
ENSMUSG00000026749.11	154.976	0.750338	0.221712	3.38429	0.000713637	0.0238936	ENSMUSG00000026749	Nek6
ENSMUSG00000078234.6	154.329	1.38029	0.42681	3.23397	0.00122084	0.0344847	ENSMUSG00000078234	Klhdc7a
ENSMUSG00000038777.19	153.889	0.906464	0.327549	2.76741	0.00565031	0.0994414	ENSMUSG00000038777	Sema6c
ENSMUSG00000033805.12	151.98	1.03979	0.310963	3.34377	0.000826489	0.0262071	ENSMUSG00000033805	Ephx4
ENSMUSG00000038670.11	150.694	2.18606	0.506979	4.31193	1.62e-05	0.00145349	ENSMUSG00000038670	Mybpc2
ENSMUSG00000051379.12	150.596	1.61603	0.44956	3.59468	0.000324787	0.013485	ENSMUSG00000051379	Flrt3
ENSMUSG00000056174.8	150.23	1.76158	0.279167	6.31013	2.79e-10	1.41e-07	ENSMUSG00000056174	Col8a2
ENSMUSG00000034227.7	149.825	1.18286	0.369484	3.20138	0.0013677	0.0370029	ENSMUSG00000034227	Foxj1
ENSMUSG00000015134.15	149.624	2.09929	0.470578	4.46109	8.15e-06	0.000886182	ENSMUSG00000015134	Aldh1a3
ENSMUSG00000031538.6	149.271	1.02438	0.288357	3.55249	0.000381603	0.0153247	ENSMUSG00000031538	Plat
ENSMUSG00000030000.10	149.174	0.949427	0.277499	3.42137	0.000623065	0.0219109	ENSMUSG00000030000	Add2
ENSMUSG00000042694.17	147.577	0.564678	0.203432	2.77576	0.00550736	0.0978558	ENSMUSG00000042694	Stn1
ENSMUSG00000045404.16	146.165	3.07968	0.302104	10.1941	2.11e-24	5.79e-21	ENSMUSG00000045404	Kcnk13
ENSMUSG00000016346.17	144.582	1.03993	0.353235	2.94402	0.00323979	0.067998	ENSMUSG00000016346	Kcnq2
ENSMUSG00000020937.14	143.556	1.42833	0.419329	3.40623	0.000658671	0.022657	ENSMUSG00000020937	Plcd3
ENSMUSG00000072812.4	139.537	1.24801	0.418554	2.98172	0.0028663	0.0620294	ENSMUSG00000072812	Ahnak2
ENSMUSG00000074505.6	138.683	3.71687	0.253674	14.6521	1.31e-48	2.51e-44	ENSMUSG00000074505	Fat3
ENSMUSG00000019647.16	137.744	0.764951	0.245032	3.12184	0.00179725	0.0453706	ENSMUSG00000019647	Sema6a
ENSMUSG00000038775.14	135.548	0.940321	0.239321	3.92912	8.53e-05	0.00518985	ENSMUSG00000038775	Vill
ENSMUSG00000025889.13	134.522	1.02054	0.309452	3.29789	0.00097414	0.0290971	ENSMUSG00000025889	Snca
ENSMUSG00000050777.7	133.896	1.24964	0.328295	3.80646	0.00014097	0.00736873	ENSMUSG00000050777	Tmem37
ENSMUSG00000042035.11	133.098	0.960788	0.281741	3.41019	0.000649186	0.0224704	ENSMUSG00000042035	Igsf3
ENSMUSG00000031274.16	132.536	1.12828	0.299748	3.76409	0.000167159	0.0083087	ENSMUSG00000031274	Col4a5
ENSMUSG00000056427.10	131.166	0.905189	0.321586	2.81476	0.00488135	0.0898542	ENSMUSG00000056427	Slit3
ENSMUSG00000058656.13	129.687	0.955525	0.31299	3.05289	0.00226648	0.0532983	ENSMUSG00000058656	Samd12
ENSMUSG00000010660.3	129.338	0.944496	0.200262	4.7163	2.4e-06	0.000355382	ENSMUSG00000010660	Plcd1
ENSMUSG00000057722.17	128.541	1.41535	0.412991	3.42707	0.000610126	0.0215346	ENSMUSG00000057722	Lepr
ENSMUSG00000036672.5	127.484	0.723886	0.209445	3.45622	0.000547812	0.0200337	ENSMUSG00000036672	Cenpt
ENSMUSG00000073910.10	127.085	0.939064	0.219326	4.28158	1.86e-05	0.00161522	ENSMUSG00000073910	Mob3b
ENSMUSG00000041734.15	126.236	1.12269	0.333327	3.36813	0.000756789	0.0247158	ENSMUSG00000041734	Kirrel
ENSMUSG00000022382.15	126.192	2.03766	0.567834	3.58849	0.000332604	0.0137296	ENSMUSG00000022382	Wnt7b
ENSMUSG00000056596.8	126.033	1.09778	0.36091	3.04169	0.00235256	0.0543916	ENSMUSG00000056596	Trnp1
ENSMUSG00000035954.10	125.593	0.93469	0.241254	3.8743	0.00010693	0.0060497	ENSMUSG00000035954	Dock4
ENSMUSG00000041343.19	125.025	0.600305	0.215127	2.79047	0.00526314	0.0949735	ENSMUSG00000041343	Ankrd42
ENSMUSG00000060548.13	124.928	1.56468	0.479916	3.26032	0.00111285	0.0320941	ENSMUSG00000060548	Tnfrsf19
ENSMUSG00000020435.17	124.081	0.679719	0.225408	3.01551	0.00256549	0.0580586	ENSMUSG00000020435	Osbp2
ENSMUSG00000061080.11	123.063	1.85599	0.361209	5.13827	2.77e-07	6.43e-05	ENSMUSG00000061080	Lsamp
ENSMUSG00000033361.13	122.954	1.81815	0.242149	7.50839	5.99e-14	5.01e-11	ENSMUSG00000033361	Prrg3
ENSMUSG00000038963.15	122.867	0.873868	0.261664	3.33965	0.000838826	0.0263225	ENSMUSG00000038963	Slco4a1
ENSMUSG00000034177.15	122.835	1.04789	0.319824	3.27646	0.00105119	0.0307305	ENSMUSG00000034177	Rnf43
ENSMUSG00000018387.12	122.76	1.18274	0.238492	4.95923	7.08e-07	0.000142674	ENSMUSG00000018387	Shroom1
ENSMUSG00000038453.17	121.788	2.14367	0.32255	6.64602	3.01e-11	1.76e-08	ENSMUSG00000038453	Srcin1
ENSMUSG00000028949.13	121.369	0.956571	0.26991	3.54403	0.000394057	0.0156938	ENSMUSG00000028949	Smarcd3
ENSMUSG00000040339.10	121.279	1.00642	0.274286	3.66924	0.000243275	0.0107331	ENSMUSG00000040339	Fam102b
ENSMUSG00000031558.15	121.204	1.05027	0.343422	3.05824	0.00222639	0.0529226	ENSMUSG00000031558	Slit2
ENSMUSG00000037813.13	119.33	1.33902	0.337141	3.97169	7.14e-05	0.00447155	ENSMUSG00000037813	D630003M21Rik
ENSMUSG00000071847.13	119.26	1.12734	0.38697	2.91325	0.00357685	0.0719709	ENSMUSG00000071847	Apcdd1
ENSMUSG00000018581.15	118.265	1.40242	0.418296	3.3527	0.00080027	0.0257856	ENSMUSG00000018581	Dnah11
ENSMUSG00000074480.4	118.253	0.889449	0.237586	3.7437	0.00018133	0.00883056	ENSMUSG00000074480	Mex3a
ENSMUSG00000035184.15	117.934	1.68601	0.396457	4.2527	2.11e-05	0.00175881	ENSMUSG00000035184	Fam124a
ENSMUSG00000050248.11	117.022	1.87641	0.273347	6.86458	6.67e-12	4.2e-09	ENSMUSG00000050248	Evc2
ENSMUSG00000042751.14	116.874	1.78989	0.402369	4.44839	8.65e-06	0.000927744	ENSMUSG00000042751	Nmnat2
ENSMUSG00000019989.8	116.213	1.0105	0.27283	3.70376	0.000212427	0.00987018	ENSMUSG00000019989	Enpp3
ENSMUSG00000041540.16	114.91	1.32236	0.395711	3.34172	0.000832621	0.0262071	ENSMUSG00000041540	Sox5
ENSMUSG00000041688.16	113.297	1.11226	0.362357	3.06952	0.00214405	0.051683	ENSMUSG00000041688	Amot
ENSMUSG00000043259.15	113.123	0.915411	0.203692	4.4941	6.99e-06	0.000776831	ENSMUSG00000043259	Fam13c
ENSMUSG00000046093.9	113.097	1.53623	0.497587	3.08736	0.00201943	0.0494222	ENSMUSG00000046093	Hpcal4
ENSMUSG00000033618.7	111.961	0.782196	0.275556	2.83861	0.00453098	0.0857854	ENSMUSG00000033618	Map3k13
ENSMUSG00000027463.14	111.356	1.10028	0.354819	3.10095	0.00192899	0.0476328	ENSMUSG00000027463	Slc52a3
ENSMUSG00000048240.14	110.659	0.943504	0.241332	3.90957	9.25e-05	0.00545577	ENSMUSG00000048240	Gng7
ENSMUSG00000005686.17	110.421	0.798043	0.287722	2.77366	0.00554301	0.0982722	ENSMUSG00000005686	Ampd3
ENSMUSG00000068452.8	110.255	2.00512	0.685807	2.92374	0.00345853	0.0708502	ENSMUSG00000068452	Duox2
ENSMUSG00000059149.17	110.012	1.00172	0.310076	3.23057	0.00123544	0.0347441	ENSMUSG00000059149	Mfsd4a
ENSMUSG00000008489.18	108.531	1.70784	0.358441	4.76462	1.89e-06	0.000291166	ENSMUSG00000008489	Elavl2
ENSMUSG00000021943.7	106.749	1.14187	0.374357	3.05021	0.0022868	0.0535144	ENSMUSG00000021943	Gdf10
ENSMUSG00000044217.17	105.891	1.86295	0.48037	3.87815	0.000105254	0.00597246	ENSMUSG00000044217	Aqp5
ENSMUSG00000041324.14	104.764	1.3437	0.336173	3.99704	6.41e-05	0.0041682	ENSMUSG00000041324	Inhba
ENSMUSG00000030030.5	104.177	0.746301	0.212351	3.51447	0.000440627	0.0170885	ENSMUSG00000030030	1700003E16Rik
ENSMUSG00000040717.6	103.79	0.969269	0.256472	3.77924	0.000157308	0.00790072	ENSMUSG00000040717	Il17rd
ENSMUSG00000031028.14	103.019	1.67626	0.451569	3.71209	0.000205556	0.00961709	ENSMUSG00000031028	Tub
ENSMUSG00000040711.8	102.855	1.43354	0.441112	3.24982	0.00115478	0.0330555	ENSMUSG00000040711	Sh3pxd2b
ENSMUSG00000024302.16	102.474	1.31302	0.383032	3.42797	0.000608111	0.0215346	ENSMUSG00000024302	Dtna
ENSMUSG00000015484.3	101.024	0.852585	0.245864	3.4677	0.000524924	0.0194181	ENSMUSG00000015484	Fam163a
ENSMUSG00000039629.14	100.313	1.10173	0.34285	3.21343	0.0013116	0.0359915	ENSMUSG00000039629	Strip2
ENSMUSG00000030340.16	100.197	1.46923	0.380341	3.86293	0.000112037	0.00626496	ENSMUSG00000030340	Scnn1a

## Sheet: DownReg_genes
Supplemental Table 5. Genes down-regulated (padj <0.1, baseMean >100 RPKM) in MIR125B-Tg versus control islets
Gene.stable.ID.version	baseMean	log2FoldChange	lfcSE	stat	pvalue	padj	Gene.stable.ID	Gene.name
ENSMUSG00000067736.2	168.838	-25.7556	3.02645	-8.51018	1.74e-17	3.71e-14	ENSMUSG00000067736	Gm10222
ENSMUSG00000039395.8	507.264	-1.6927	0.208604	-8.11439	4.88e-16	7.83e-13	ENSMUSG00000039395	Mreg
ENSMUSG00000032091.15	790.71	-1.21207	0.15572	-7.78365	7.05e-15	7.53e-12	ENSMUSG00000032091	Tmprss4
ENSMUSG00000090236.3	1216.27	-1.87018	0.245709	-7.61137	2.71e-14	2.48e-11	ENSMUSG00000090236	Car15
ENSMUSG00000031762.7	3297	-1.62812	0.220792	-7.37398	1.66e-13	1.27e-10	ENSMUSG00000031762	Mt2
ENSMUSG00000099413.1	350.112	-1.33319	0.182413	-7.30865	2.7e-13	2e-10	ENSMUSG00000099413	Gm17767
ENSMUSG00000026307.12	2634.11	-0.662829	0.0956868	-6.92707	4.3e-12	2.85e-09	ENSMUSG00000026307	Scly
ENSMUSG00000032245.12	2818.15	-1.10493	0.166848	-6.6224	3.53e-11	2e-08	ENSMUSG00000032245	Cln6
ENSMUSG00000044164.2	414.733	-1.4326	0.217799	-6.57762	4.78e-11	2.55e-08	ENSMUSG00000044164	Rnf182
ENSMUSG00000031765.8	8234.2	-1.3713	0.216531	-6.33305	2.4e-10	1.25e-07	ENSMUSG00000031765	Mt1
ENSMUSG00000026312.17	244.604	-1.52722	0.243894	-6.2618	3.81e-10	1.88e-07	ENSMUSG00000026312	Cdh7
ENSMUSG00000034164.17	306.976	-1.66746	0.273236	-6.10263	1.04e-09	4.67e-07	ENSMUSG00000034164	Emid1
ENSMUSG00000026473.16	8256.6	-0.711354	0.119297	-5.9629	2.48e-09	1.06e-06	ENSMUSG00000026473	Glul
ENSMUSG00000042529.14	106.683	-1.85865	0.313198	-5.93443	2.95e-09	1.21e-06	ENSMUSG00000042529	Kcnj12
ENSMUSG00000029273.10	709.478	-1.56394	0.266648	-5.8652	4.49e-09	1.73e-06	ENSMUSG00000029273	Sult1d1
ENSMUSG00000063011.7	1715.56	-1.38548	0.238547	-5.80801	6.32e-09	2.34e-06	ENSMUSG00000063011	Msln
ENSMUSG00000037106.8	241.715	-1.57638	0.273729	-5.75891	8.47e-09	3.07e-06	ENSMUSG00000037106	Fer1l6
ENSMUSG00000044988.7	5784.15	-1.19918	0.210349	-5.7009	1.19e-08	4.17e-06	ENSMUSG00000044988	Ucn3
ENSMUSG00000021803.10	1491.1	-1.22149	0.215379	-5.67135	1.42e-08	4.78e-06	ENSMUSG00000021803	Cdhr1
ENSMUSG00000061126.5	169.168	-2.20143	0.389899	-5.64616	1.64e-08	5.35e-06	ENSMUSG00000061126	Cyp4f39
ENSMUSG00000042429.8	890.324	-0.808358	0.143345	-5.63926	1.71e-08	5.48e-06	ENSMUSG00000042429	Adora1
ENSMUSG00000002997.15	1051.23	-0.907164	0.162102	-5.59624	2.19e-08	6.8e-06	ENSMUSG00000002997	Prkar2b
ENSMUSG00000025127.15	808.073	-1.19963	0.215969	-5.55465	2.78e-08	8.36e-06	ENSMUSG00000025127	Gcgr
ENSMUSG00000030406.7	3295.78	-0.985663	0.18165	-5.42617	5.76e-08	1.7e-05	ENSMUSG00000030406	Gipr
ENSMUSG00000044453.5	2004.52	-1.21937	0.229419	-5.31504	1.07e-07	2.89e-05	ENSMUSG00000044453	Ffar1
ENSMUSG00000019429.7	249.654	-1.39847	0.268492	-5.20862	1.9e-07	4.88e-05	ENSMUSG00000019429	Ffar3
ENSMUSG00000000214.11	628.894	-1.74508	0.336068	-5.19262	2.07e-07	5.18e-05	ENSMUSG00000000214	Th
ENSMUSG00000052373.14	373.519	-1.22065	0.235975	-5.1728	2.31e-07	5.69e-05	ENSMUSG00000052373	Mpp3
ENSMUSG00000032356.12	2231.65	-0.827044	0.16012	-5.16517	2.4e-07	5.85e-05	ENSMUSG00000032356	Rasgrf1
ENSMUSG00000029919.5	167.468	-1.33207	0.259053	-5.14207	2.72e-07	6.43e-05	ENSMUSG00000029919	Hpgds
ENSMUSG00000028749.7	4268.71	-0.764127	0.148655	-5.14029	2.74e-07	6.43e-05	ENSMUSG00000028749	Pla2g2f
ENSMUSG00000027560.4	103.62	-0.944754	0.187428	-5.04062	4.64e-07	9.83e-05	ENSMUSG00000027560	Dok5
ENSMUSG00000050473.5	543.239	-0.934559	0.185729	-5.03186	4.86e-07	0.000101565	ENSMUSG00000050473	Slc35d3
ENSMUSG00000044254.6	647.391	-0.696899	0.138798	-5.02094	5.14e-07	0.000106352	ENSMUSG00000044254	Pcsk9
ENSMUSG00000021913.8	3113.36	-0.814476	0.162668	-5.00697	5.53e-07	0.000113149	ENSMUSG00000021913	Ogdhl
ENSMUSG00000022129.4	247.482	-1.37195	0.276735	-4.95763	7.14e-07	0.000142674	ENSMUSG00000022129	Dct
ENSMUSG00000041842.15	510.03	-0.970926	0.196439	-4.94263	7.71e-07	0.000146798	ENSMUSG00000041842	Fhdc1
ENSMUSG00000018470.8	385.694	-0.976709	0.197971	-4.9336	8.07e-07	0.000150767	ENSMUSG00000018470	Kcnab3
ENSMUSG00000023017.10	1300.42	-0.846516	0.172969	-4.89403	9.88e-07	0.000180987	ENSMUSG00000023017	Asic1
ENSMUSG00000000544.14	353.91	-0.882695	0.181163	-4.87238	1.1e-06	0.000198227	ENSMUSG00000000544	Gpa33
ENSMUSG00000028878.11	1118.46	-0.50858	0.104506	-4.86652	1.14e-06	0.000200444	ENSMUSG00000028878	Fam76a
ENSMUSG00000074240.5	541.758	-1.72504	0.355883	-4.84722	1.25e-06	0.000215077	ENSMUSG00000074240	Cib3
ENSMUSG00000007038.5	2226.48	-0.606039	0.125722	-4.82047	1.43e-06	0.000238822	ENSMUSG00000007038	Neu1
ENSMUSG00000078670.3	7020.67	-0.576449	0.119611	-4.81936	1.44e-06	0.000238822	ENSMUSG00000078670	Fam174b
ENSMUSG00000024064.14	1085.21	-0.8478	0.177878	-4.76618	1.88e-06	0.000291166	ENSMUSG00000024064	Galnt14
ENSMUSG00000039470.15	5039.83	-0.824861	0.173247	-4.76118	1.92e-06	0.000293828	ENSMUSG00000039470	Zdhhc2
ENSMUSG00000022941.8	509.092	-0.892582	0.188252	-4.74142	2.12e-06	0.000318938	ENSMUSG00000022941	Ripply3
ENSMUSG00000021364.16	332.391	-0.794569	0.169923	-4.67604	2.92e-06	0.000419837	ENSMUSG00000021364	Elovl2
ENSMUSG00000104283.1	209.045	-1.83581	0.393701	-4.66295	3.12e-06	0.000437673	ENSMUSG00000104283	Gm37459
ENSMUSG00000090291.3	1762.69	-0.629591	0.136029	-4.62836	3.69e-06	0.000495795	ENSMUSG00000090291	Lrrc10b
ENSMUSG00000024553.8	618.731	-0.534488	0.11605	-4.60568	4.11e-06	0.00053435	ENSMUSG00000024553	Galr1
ENSMUSG00000079620.13	1019.4	-1.25735	0.273132	-4.60346	4.16e-06	0.00053646	ENSMUSG00000079620	Muc4
ENSMUSG00000040181.14	263.538	-1.01906	0.222228	-4.58567	4.53e-06	0.000576482	ENSMUSG00000040181	Fmo1
ENSMUSG00000025366.8	5302.41	-0.753361	0.164491	-4.57994	4.65e-06	0.000584754	ENSMUSG00000025366	Esyt1
ENSMUSG00000074207.10	2274.27	-1.24451	0.273086	-4.55721	5.18e-06	0.000642137	ENSMUSG00000074207	Adh1
ENSMUSG00000074892.9	570.17	-1.07088	0.235094	-4.55513	5.24e-06	0.000642137	ENSMUSG00000074892	B3galt5
ENSMUSG00000046593.3	3173.14	-0.975961	0.214423	-4.55157	5.32e-06	0.000642944	ENSMUSG00000046593	Tmem215
ENSMUSG00000058159.14	230.276	-1.33716	0.295106	-4.5311	5.87e-06	0.000679943	ENSMUSG00000058159	T2
ENSMUSG00000009246.14	2745.12	-1.60357	0.35477	-4.52003	6.18e-06	0.000712202	ENSMUSG00000009246	Trpm5
ENSMUSG00000044716.12	110.377	-1.5099	0.335207	-4.50438	6.66e-06	0.000755661	ENSMUSG00000044716	Dok7
ENSMUSG00000021999.9	319.299	-1.10512	0.246172	-4.4892	7.15e-06	0.000785817	ENSMUSG00000021999	Cpb2
ENSMUSG00000043333.12	267.886	-0.879237	0.197414	-4.45377	8.44e-06	0.000911821	ENSMUSG00000043333	Rhbdl2
ENSMUSG00000051209.3	488.385	-1.11233	0.2502	-4.44577	8.76e-06	0.000930737	ENSMUSG00000051209	Gpr119
ENSMUSG00000020732.13	3250.68	-0.870967	0.196359	-4.43558	9.18e-06	0.000965212	ENSMUSG00000020732	Rab37
ENSMUSG00000049999.4	222.042	-0.76053	0.172693	-4.40394	1.06e-05	0.00107621	ENSMUSG00000049999	Ppp1r3d
ENSMUSG00000027168.21	6122.92	-0.6249	0.143749	-4.34717	1.38e-05	0.00130676	ENSMUSG00000027168	Pax6
ENSMUSG00000033209.17	1464.47	-0.752788	0.173289	-4.34412	1.4e-05	0.00131856	ENSMUSG00000033209	Ttc28
ENSMUSG00000027230.9	1466.39	-0.57302	0.133173	-4.30281	1.69e-05	0.00149496	ENSMUSG00000027230	Creb3l1
ENSMUSG00000045284.9	1224.57	-0.830509	0.19353	-4.29138	1.78e-05	0.00156383	ENSMUSG00000045284	Dcaf12l1
ENSMUSG00000044139.12	16588.5	-0.630206	0.146874	-4.29079	1.78e-05	0.00156383	ENSMUSG00000044139	Prss53
ENSMUSG00000039372.5	682.028	-0.695101	0.162968	-4.26526	2e-05	0.00169945	ENSMUSG00000039372	Marchf4
ENSMUSG00000047205.12	991.686	-0.504966	0.118573	-4.25868	2.06e-05	0.00172178	ENSMUSG00000047205	Dusp18
ENSMUSG00000039419.17	684.672	-0.884422	0.208068	-4.25063	2.13e-05	0.00176744	ENSMUSG00000039419	Cntnap2
ENSMUSG00000027690.13	7202.97	-0.948814	0.223411	-4.24695	2.17e-05	0.00177736	ENSMUSG00000027690	Slc2a2
ENSMUSG00000031255.14	4046.32	-0.778729	0.183381	-4.2465	2.17e-05	0.00177736	ENSMUSG00000031255	Sytl4
ENSMUSG00000046447.3	14125.3	-0.938377	0.22116	-4.24298	2.21e-05	0.00179785	ENSMUSG00000046447	Camk2n1
ENSMUSG00000042589.18	734.863	-0.946165	0.223801	-4.22771	2.36e-05	0.00189767	ENSMUSG00000042589	Cux2
ENSMUSG00000029644.7	2581.91	-0.678262	0.161681	-4.19506	2.73e-05	0.00214188	ENSMUSG00000029644	Pdx1
ENSMUSG00000024712.9	2275.8	-0.583644	0.139161	-4.19403	2.74e-05	0.00214286	ENSMUSG00000024712	Rfk
ENSMUSG00000032667.17	753.293	-0.612324	0.148749	-4.1165	3.85e-05	0.00288138	ENSMUSG00000032667	Pon2
ENSMUSG00000039910.10	1875.15	-1.05967	0.258009	-4.10712	4.01e-05	0.00297549	ENSMUSG00000039910	Cited2
ENSMUSG00000038296.14	1322.21	-0.756319	0.18465	-4.09597	4.2e-05	0.00307014	ENSMUSG00000038296	Galnt18
ENSMUSG00000028753.12	102.384	-1.38207	0.337609	-4.09369	4.25e-05	0.00308184	ENSMUSG00000028753	Vwa5b1
ENSMUSG00000024027.8	9270.61	-0.810405	0.198271	-4.08736	4.36e-05	0.00314337	ENSMUSG00000024027	Glp1r
ENSMUSG00000074344.7	189.741	-1.63719	0.400918	-4.08362	4.43e-05	0.00318258	ENSMUSG00000074344	Tmigd3
ENSMUSG00000026617.16	2287.46	-0.524164	0.128945	-4.06503	4.8e-05	0.00337172	ENSMUSG00000026617	Bpnt1
ENSMUSG00000038267.15	1568.19	-0.834509	0.206728	-4.03675	5.42e-05	0.00372327	ENSMUSG00000038267	Slc22a23
ENSMUSG00000034714.9	1347.77	-0.431557	0.107111	-4.02905	5.6e-05	0.00381084	ENSMUSG00000034714	Ttyh2
ENSMUSG00000025092.7	586.706	-0.748848	0.186593	-4.01326	5.99e-05	0.00394504	ENSMUSG00000025092	Hspa12a
ENSMUSG00000037902.18	2926.07	-0.497687	0.124039	-4.01236	6.01e-05	0.00394668	ENSMUSG00000037902	Sirpa
ENSMUSG00000024013.15	1094.91	-0.615799	0.154899	-3.97549	7.02e-05	0.00444427	ENSMUSG00000024013	Fgd2
ENSMUSG00000000326.13	1535.81	-0.640189	0.161341	-3.96792	7.25e-05	0.00451339	ENSMUSG00000000326	Comt
ENSMUSG00000026643.16	1484.8	-0.460788	0.117321	-3.92757	8.58e-05	0.00520691	ENSMUSG00000026643	Nmt2
ENSMUSG00000045009.9	119.657	-1.00533	0.256388	-3.92113	8.81e-05	0.00531465	ENSMUSG00000045009	Prrt3
ENSMUSG00000044365.15	1745.17	-0.695561	0.177358	-3.92179	8.79e-05	0.00531465	ENSMUSG00000044365	Cxxc4
ENSMUSG00000042647.13	453.751	-0.474077	0.12106	-3.91605	9e-05	0.00534397	ENSMUSG00000042647	Acad12
ENSMUSG00000038784.13	676.043	-0.398554	0.101758	-3.91667	8.98e-05	0.00534397	ENSMUSG00000038784	Cnot4
ENSMUSG00000032338.9	453.96	-0.8594	0.220024	-3.90594	9.39e-05	0.00548782	ENSMUSG00000032338	Hcn4
ENSMUSG00000022098.10	2566.34	-0.769387	0.197058	-3.90437	9.45e-05	0.00550688	ENSMUSG00000022098	Bmp1
ENSMUSG00000026544.6	487.973	-0.74764	0.191538	-3.90335	9.49e-05	0.0055133	ENSMUSG00000026544	Dusp23
ENSMUSG00000027984.8	11633.7	-0.687938	0.176954	-3.88767	0.000101213	0.00581173	ENSMUSG00000027984	Hadh
ENSMUSG00000041608.8	2771.24	-0.683243	0.176059	-3.88075	0.000104133	0.00592634	ENSMUSG00000041608	Entpd3
ENSMUSG00000116652.2	2579.38	-0.773427	0.200018	-3.86679	0.000110277	0.00620262	ENSMUSG00000116652	B830017H08Rik
ENSMUSG00000027603.15	686.256	-0.679707	0.175756	-3.86733	0.000110033	0.00620262	ENSMUSG00000027603	Ggt7
ENSMUSG00000018995.12	318.131	-0.663017	0.172302	-3.848	0.000119084	0.00654089	ENSMUSG00000018995	Nars2
ENSMUSG00000033717.6	3236.19	-0.509002	0.132296	-3.84745	0.000119352	0.00654089	ENSMUSG00000033717	Adra2a
ENSMUSG00000021111.15	3216.9	-0.451629	0.117522	-3.84293	0.000121575	0.00660935	ENSMUSG00000021111	Papola
ENSMUSG00000034785.14	2165.93	-0.905908	0.236686	-3.82747	0.000129466	0.00691778	ENSMUSG00000034785	Dio1
ENSMUSG00000034687.8	513.915	-0.757841	0.198786	-3.81234	0.000137659	0.0072548	ENSMUSG00000034687	Fras1
ENSMUSG00000114206.1	185.043	-1.43871	0.379604	-3.79004	0.000150621	0.00767688	ENSMUSG00000114206	Gm30551
ENSMUSG00000027166.14	459.515	-1.1524	0.306076	-3.76506	0.000166506	0.0082977	ENSMUSG00000027166	Dnajc24
ENSMUSG00000038375.15	7116.98	-0.483948	0.128595	-3.76335	0.000167655	0.00831189	ENSMUSG00000038375	Trp53inp2
ENSMUSG00000034813.18	294.55	-0.777678	0.207154	-3.7541	0.000173963	0.00858041	ENSMUSG00000034813	Grip1
ENSMUSG00000005373.13	6227.29	-0.865592	0.230939	-3.74814	0.000178147	0.00874195	ENSMUSG00000005373	Mlxipl
ENSMUSG00000030872.14	2143.65	-0.500847	0.133611	-3.74854	0.00017787	0.00874195	ENSMUSG00000030872	Gga2
ENSMUSG00000023942.15	3202.75	-0.411076	0.109734	-3.74611	0.000179597	0.00879064	ENSMUSG00000023942	Slc29a1
ENSMUSG00000097184.2	270.394	-0.862417	0.230353	-3.7439	0.000181189	0.00883056	ENSMUSG00000097184	4632428C04Rik
ENSMUSG00000021453.2	2710.82	-0.882131	0.236924	-3.72326	0.000196664	0.00940272	ENSMUSG00000021453	Gadd45g
ENSMUSG00000034336.3	1001.27	-0.380579	0.102257	-3.7218	0.00019781	0.00941849	ENSMUSG00000034336	Ina
ENSMUSG00000020260.9	3397.86	-0.470733	0.126634	-3.71727	0.00020139	0.00951826	ENSMUSG00000020260	Pofut2
ENSMUSG00000036327.18	1891.32	-0.507356	0.136573	-3.7149	0.000203287	0.00958437	ENSMUSG00000036327	Qsox2
ENSMUSG00000024972.16	340.784	-1.06561	0.286928	-3.71386	0.000204121	0.0095973	ENSMUSG00000024972	Lgals12
ENSMUSG00000022211.9	1422.17	-0.557265	0.150613	-3.69998	0.000215615	0.00999415	ENSMUSG00000022211	Carmil3
ENSMUSG00000022026.7	960.223	-0.631444	0.170964	-3.69343	0.000221249	0.0102061	ENSMUSG00000022026	Olfm4
ENSMUSG00000039428.11	987.693	-0.421326	0.114199	-3.68941	0.000224778	0.0102704	ENSMUSG00000039428	Tmem135
ENSMUSG00000027004.3	6192.9	-0.62803	0.170341	-3.68689	0.000227011	0.0103234	ENSMUSG00000027004	Frzb
ENSMUSG00000034871.2	9073.77	-0.949641	0.257617	-3.68626	0.000227576	0.0103247	ENSMUSG00000034871	Fam151a
ENSMUSG00000028186.14	164.334	-1.04843	0.285194	-3.67619	0.00023674	0.0105617	ENSMUSG00000028186	Uox
ENSMUSG00000040354.14	1802.46	-0.699413	0.19028	-3.67571	0.000237193	0.0105617	ENSMUSG00000040354	Mars1
ENSMUSG00000041720.14	2559.06	-0.458832	0.125345	-3.66056	0.000251666	0.0110324	ENSMUSG00000041720	Pi4ka
ENSMUSG00000002221.11	2126.23	-0.497854	0.136525	-3.64661	0.000265727	0.0114352	ENSMUSG00000002221	Paxip1
ENSMUSG00000032633.12	1496.38	-0.575832	0.158021	-3.64402	0.000268416	0.0115251	ENSMUSG00000032633	Flcn
ENSMUSG00000020131.14	433.46	-0.795424	0.218634	-3.63815	0.000274603	0.0117418	ENSMUSG00000020131	Pcsk4
ENSMUSG00000025993.10	1567.96	-1.22299	0.337102	-3.62795	0.000285681	0.012131	ENSMUSG00000025993	Slc40a1
ENSMUSG00000022490.7	3973.03	-0.705404	0.194977	-3.61789	0.000297015	0.0125019	ENSMUSG00000022490	Ppp1r1a
ENSMUSG00000037966.15	2269.06	-0.513513	0.143094	-3.58864	0.000332408	0.0137296	ENSMUSG00000037966	Ninj1
ENSMUSG00000021287.12	248.842	-0.839231	0.234244	-3.58272	0.000340033	0.0139843	ENSMUSG00000021287	Xrcc3
ENSMUSG00000074064.6	1297.09	-0.501528	0.140271	-3.57542	0.000349668	0.0143416	ENSMUSG00000074064	Mlycd
ENSMUSG00000032890.17	2496.64	-0.975409	0.27299	-3.57306	0.000352834	0.0144407	ENSMUSG00000032890	Rims3
ENSMUSG00000024150.12	2197.56	-0.839296	0.235064	-3.5705	0.000356297	0.0145035	ENSMUSG00000024150	Mcfd2
ENSMUSG00000022453.8	4405.58	-0.445991	0.124927	-3.57002	0.000356951	0.0145035	ENSMUSG00000022453	Naga
ENSMUSG00000045294.11	2220.18	-0.355873	0.0996925	-3.5697	0.000357384	0.0145035	ENSMUSG00000045294	Insig1
ENSMUSG00000028555.15	1487.86	-0.386818	0.108494	-3.56533	0.000363401	0.0146857	ENSMUSG00000028555	Ttc39a
ENSMUSG00000050144.13	1848.11	-0.455611	0.128608	-3.54264	0.000396137	0.015744	ENSMUSG00000050144	Slc25a44
ENSMUSG00000003500.13	1977.75	-0.712773	0.202407	-3.52149	0.000429132	0.0168122	ENSMUSG00000003500	Impdh1
ENSMUSG00000043621.13	996.478	-0.672346	0.191005	-3.52005	0.000431464	0.0168692	ENSMUSG00000043621	Ubxn10
ENSMUSG00000039914.6	835.98	-0.441732	0.125537	-3.51873	0.000433611	0.0169187	ENSMUSG00000039914	Coq10a
ENSMUSG00000052117.5	500.215	-0.6983	0.198595	-3.51621	0.000437762	0.0170363	ENSMUSG00000052117	D630039A03Rik
ENSMUSG00000022472.16	3226.44	-0.428488	0.121874	-3.51582	0.000438394	0.0170363	ENSMUSG00000022472	Desi1
ENSMUSG00000046982.11	2794	-0.507602	0.144617	-3.50998	0.000448135	0.0172752	ENSMUSG00000046982	Tshz1
ENSMUSG00000031024.13	1429.22	-0.512008	0.14597	-3.50763	0.000452119	0.0173592	ENSMUSG00000031024	Denn2b
ENSMUSG00000031442.21	2708.56	-0.462241	0.13185	-3.5058	0.000455234	0.017444	ENSMUSG00000031442	Mcf2l
ENSMUSG00000024513.16	2469.41	-0.400231	0.114713	-3.48896	0.000484895	0.0183611	ENSMUSG00000024513	Mbd2
ENSMUSG00000031803.8	893.033	-0.542694	0.156351	-3.47101	0.00051851	0.0192549	ENSMUSG00000031803	B3gnt3
ENSMUSG00000019066.13	4764.09	-0.489995	0.141291	-3.46798	0.000524379	0.0194181	ENSMUSG00000019066	Rab3d
ENSMUSG00000041774.16	317.41	-0.53316	0.153915	-3.46399	0.000532227	0.0195688	ENSMUSG00000041774	Ydjc
ENSMUSG00000032782.19	478.298	-0.799675	0.231754	-3.45053	0.000559482	0.0202538	ENSMUSG00000032782	Cntrob
ENSMUSG00000050556.9	1244.83	-0.607229	0.176159	-3.44705	0.000566738	0.0204033	ENSMUSG00000050556	Kcnb1
ENSMUSG00000035891.16	1535.98	-0.452247	0.131487	-3.43948	0.000582837	0.0208005	ENSMUSG00000035891	Cerk
ENSMUSG00000051403.9	5373.77	-0.491655	0.143227	-3.4327	0.000597609	0.0212488	ENSMUSG00000051403	Ppp1r37
ENSMUSG00000042203.8	1841.96	-0.488409	0.143393	-3.40609	0.00065901	0.022657	ENSMUSG00000042203	Tbc1d22b
ENSMUSG00000028292.14	481.937	-0.608801	0.178796	-3.40501	0.00066161	0.0226851	ENSMUSG00000028292	Rars2
ENSMUSG00000043668.13	1232.44	-0.545686	0.160872	-3.39205	0.000693708	0.0234108	ENSMUSG00000043668	Tox3
ENSMUSG00000025935.10	5351.57	-0.62679	0.184932	-3.3893	0.000700721	0.0235648	ENSMUSG00000025935	Tram1
ENSMUSG00000052889.11	1398.17	-0.585841	0.173344	-3.37965	0.00072578	0.0240709	ENSMUSG00000052889	Prkcb
ENSMUSG00000092286.1	163.578	-1.20044	0.35592	-3.37278	0.000744138	0.0245107	ENSMUSG00000092286	Dtnbos
ENSMUSG00000038152.4	127.462	-0.766121	0.228728	-3.34949	0.00080961	0.0259435	ENSMUSG00000038152	5033430I15Rik
ENSMUSG00000024247.14	3377.74	-0.533464	0.159274	-3.34935	0.000810009	0.0259435	ENSMUSG00000024247	Pkdcc
ENSMUSG00000024899.7	7203.5	-0.793871	0.23746	-3.34318	0.000828246	0.0262071	ENSMUSG00000024899	Papss2
ENSMUSG00000019737.14	1030.55	-0.730234	0.218495	-3.34211	0.000831436	0.0262071	ENSMUSG00000019737	Syne4
ENSMUSG00000087694.8	768.205	-0.733984	0.220326	-3.33135	0.000864269	0.0268295	ENSMUSG00000087694	A530058N18Rik
ENSMUSG00000027243.8	380.308	-0.480703	0.144547	-3.32559	0.000882307	0.0271988	ENSMUSG00000027243	Harbi1
ENSMUSG00000048218.6	1684.98	-0.552646	0.166343	-3.32233	0.000892701	0.0274313	ENSMUSG00000048218	Amigo2
ENSMUSG00000025817.12	698.432	-0.467693	0.140855	-3.32038	0.000898936	0.0275788	ENSMUSG00000025817	Nudt5
ENSMUSG00000026457.14	2433.65	-0.372812	0.11281	-3.30479	0.000950465	0.0288378	ENSMUSG00000026457	Adipor1
ENSMUSG00000035187.10	12876.1	-0.585014	0.177049	-3.30426	0.000952286	0.0288475	ENSMUSG00000035187	Nkx6-1
ENSMUSG00000035121.6	251.842	-0.564376	0.170885	-3.30266	0.00095773	0.0289056	ENSMUSG00000035121	Neil2
ENSMUSG00000046070.9	1152.38	-0.778469	0.236232	-3.29535	0.000982976	0.0292249	ENSMUSG00000046070	Igfals
ENSMUSG00000031755.6	967.998	-0.486578	0.147716	-3.29402	0.000987646	0.0293185	ENSMUSG00000031755	Bbs2
ENSMUSG00000026687.14	1984	-0.52249	0.158682	-3.29269	0.000992354	0.0293375	ENSMUSG00000026687	Aldh9a1
ENSMUSG00000020788.15	19058.1	-0.470253	0.142824	-3.29254	0.000992863	0.0293375	ENSMUSG00000020788	Atp2a3
ENSMUSG00000030499.9	391.559	-0.624312	0.189647	-3.29196	0.00099492	0.0293532	ENSMUSG00000030499	Kctd15
ENSMUSG00000054708.17	1047.14	-0.392979	0.120054	-3.27334	0.00106285	0.0310244	ENSMUSG00000054708	Ankrd24
ENSMUSG00000039771.13	413.084	-0.522225	0.161007	-3.24348	0.00118078	0.0336497	ENSMUSG00000039771	Polr2j
ENSMUSG00000021038.17	908.117	-0.442585	0.136603	-3.23993	0.0011956	0.0339713	ENSMUSG00000021038	Vipas39
ENSMUSG00000000876.11	378.37	-0.435089	0.134529	-3.23416	0.00122	0.0344847	ENSMUSG00000000876	Pxmp4
ENSMUSG00000020183.11	342.801	-0.900875	0.279036	-3.22852	0.0012443	0.0348913	ENSMUSG00000020183	Cpm
ENSMUSG00000092118.1	172.996	-0.659954	0.204892	-3.22099	0.00127748	0.0354598	ENSMUSG00000092118	Fancf
ENSMUSG00000051817.8	575.993	-0.55636	0.172718	-3.2212	0.00127653	0.0354598	ENSMUSG00000051817	Sox12
ENSMUSG00000109305.1	200.345	-2.0461	0.635512	-3.21961	0.00128364	0.0355793	ENSMUSG00000109305	Smim38
ENSMUSG00000038271.17	1439.6	-0.354974	0.110383	-3.21584	0.00130064	0.0358955	ENSMUSG00000038271	Iffo1
ENSMUSG00000027525.18	134.712	-0.772769	0.240342	-3.21528	0.00130316	0.0359134	ENSMUSG00000027525	Phactr3
ENSMUSG00000111977.1	958.414	-0.519254	0.161551	-3.21417	0.0013082	0.0359743	ENSMUSG00000111977	Gm47163
ENSMUSG00000032193.9	4134.61	-0.453372	0.141063	-3.21398	0.00130911	0.0359743	ENSMUSG00000032193	Ldlr
ENSMUSG00000031438.11	1269.86	-0.560485	0.174491	-3.21212	0.0013176	0.0360533	ENSMUSG00000031438	Rnf128
ENSMUSG00000029475.17	1120.71	-0.510042	0.159084	-3.20611	0.00134543	0.0366583	ENSMUSG00000029475	Kdm2b
ENSMUSG00000044933.3	4869.2	-0.94188	0.293964	-3.20407	0.00135499	0.0367625	ENSMUSG00000044933	Sstr3
ENSMUSG00000016624.15	531.487	-0.889383	0.278059	-3.19854	0.00138126	0.0372231	ENSMUSG00000016624	Phf21b
ENSMUSG00000059811.13	1154.97	-0.443091	0.138508	-3.19902	0.00137893	0.0372231	ENSMUSG00000059811	Atl2
ENSMUSG00000028680.14	466.753	-0.823151	0.257766	-3.19341	0.00140603	0.0377217	ENSMUSG00000028680	Plk3
ENSMUSG00000026452.15	253.383	-0.75816	0.237835	-3.18775	0.00143385	0.0382546	ENSMUSG00000026452	Syt2
ENSMUSG00000025404.15	2276.32	-0.637774	0.201193	-3.16996	0.00152459	0.0403398	ENSMUSG00000025404	R3hdm2
ENSMUSG00000038208.13	526.511	-0.568157	0.179334	-3.16814	0.00153415	0.0405371	ENSMUSG00000038208	Pgap3
ENSMUSG00000044156.14	5668.81	-0.548875	0.173582	-3.16205	0.00156662	0.0411688	ENSMUSG00000044156	Hepacam2
ENSMUSG00000041729.15	1216.47	-0.481927	0.15241	-3.16205	0.00156661	0.0411688	ENSMUSG00000041729	Coro2b
ENSMUSG00000021257.14	697.302	-0.505178	0.159984	-3.15769	0.00159027	0.0416764	ENSMUSG00000021257	Angel1
ENSMUSG00000027495.4	1775.66	-0.821108	0.260138	-3.15644	0.0015971	0.0417416	ENSMUSG00000027495	Fam210b
ENSMUSG00000021211.4	1089.92	-0.695968	0.220545	-3.15568	0.00160125	0.0417698	ENSMUSG00000021211	Akr1c12
ENSMUSG00000031974.8	1270.99	-0.479287	0.151927	-3.15472	0.00160655	0.0417854	ENSMUSG00000031974	Abcb10
ENSMUSG00000030256.11	1656.02	-0.453131	0.143644	-3.15455	0.00160746	0.0417854	ENSMUSG00000030256	Bhlhe41
ENSMUSG00000029752.12	3151.21	-0.681888	0.216784	-3.14547	0.00165823	0.0429153	ENSMUSG00000029752	Asns
ENSMUSG00000025318.13	732.895	-0.440583	0.140578	-3.13409	0.00172388	0.0441552	ENSMUSG00000025318	Jph3
ENSMUSG00000018102.5	1793.41	-0.903725	0.288749	-3.12979	0.00174929	0.0446278	ENSMUSG00000018102	H2bc4
ENSMUSG00000020122.16	243.677	-0.674692	0.215747	-3.12724	0.00176458	0.0448394	ENSMUSG00000020122	Egfr
ENSMUSG00000032114.9	2191.32	-0.474515	0.151929	-3.12326	0.00178857	0.0453282	ENSMUSG00000032114	Slc37a4
ENSMUSG00000033863.2	3721.04	-0.875465	0.280841	-3.11729	0.00182521	0.0456563	ENSMUSG00000033863	Klf9
ENSMUSG00000021303.14	3959.38	-0.567078	0.181909	-3.11737	0.00182473	0.0456563	ENSMUSG00000021303	Gng4
ENSMUSG00000074272.10	268.954	-0.866997	0.278351	-3.11476	0.00184092	0.0458266	ENSMUSG00000074272	Ceacam1
ENSMUSG00000037185.9	170.48	-0.71785	0.230557	-3.11355	0.00184854	0.0459411	ENSMUSG00000037185	Krt80
ENSMUSG00000024442.6	1325.46	-0.422555	0.135994	-3.10715	0.00188898	0.0468253	ENSMUSG00000024442	Dele1
ENSMUSG00000015363.13	4845.66	-0.548356	0.177406	-3.09096	0.00199512	0.0490769	ENSMUSG00000015363	Trabd
ENSMUSG00000020182.16	9536.97	-0.998576	0.325082	-3.07177	0.00212794	0.0515759	ENSMUSG00000020182	Ddc
ENSMUSG00000040010.10	2445.13	-0.571255	0.185955	-3.072	0.00212627	0.0515759	ENSMUSG00000040010	Slc7a5
ENSMUSG00000046152.16	225.808	-0.515435	0.167866	-3.07051	0.00213693	0.0515759	ENSMUSG00000046152	Fut10
ENSMUSG00000098053.1	258.436	-0.74255	0.242156	-3.06641	0.00216645	0.0520299	ENSMUSG00000098053	Gm27033
ENSMUSG00000020553.8	361.947	-0.507019	0.165353	-3.06627	0.00216744	0.0520299	ENSMUSG00000020553	Pctp
ENSMUSG00000024180.14	1380.86	-0.426707	0.139133	-3.06691	0.00216288	0.0520299	ENSMUSG00000024180	Tmem8
ENSMUSG00000015027.11	1049.83	-0.440228	0.143649	-3.06461	0.00217951	0.0522106	ENSMUSG00000015027	Galns
ENSMUSG00000059824.12	4312.56	-0.660568	0.216226	-3.05498	0.00225073	0.0531227	ENSMUSG00000059824	Dbp
ENSMUSG00000031584.16	1114.55	-0.348423	0.114118	-3.0532	0.00226418	0.0532983	ENSMUSG00000031584	Gsr
ENSMUSG00000068617.5	1723.88	-0.646027	0.211912	-3.04857	0.00229934	0.0537425	ENSMUSG00000068617	Efcab1
ENSMUSG00000084902.2	135.51	-1.29206	0.423902	-3.04802	0.00230357	0.0537759	ENSMUSG00000084902	Gm281
ENSMUSG00000028152.10	2308.22	-0.513839	0.168673	-3.04637	0.00231625	0.0540066	ENSMUSG00000028152	Tspan5
ENSMUSG00000028955.3	1568.91	-0.364326	0.119689	-3.04394	0.00233499	0.0542463	ENSMUSG00000028955	Vamp3
ENSMUSG00000042115.4	105.885	-0.575964	0.190118	-3.02951	0.0024495	0.0559603	ENSMUSG00000042115	Klhdc8a
ENSMUSG00000060002.14	571.083	-0.680846	0.225015	-3.02578	0.00247992	0.0565209	ENSMUSG00000060002	Chpt1
ENSMUSG00000056978.8	242.571	-1.693	0.560647	-3.01973	0.00253002	0.0573909	ENSMUSG00000056978	Hamp2
ENSMUSG00000020734.13	570.685	-0.518978	0.171851	-3.01993	0.00252836	0.0573909	ENSMUSG00000020734	Grin2c
ENSMUSG00000005514.14	5888.9	-0.492918	0.163231	-3.01976	0.00252979	0.0573909	ENSMUSG00000005514	Por
ENSMUSG00000045761.16	206.791	-0.821923	0.272476	-3.0165	0.00255715	0.0579379	ENSMUSG00000045761	Togaram2
ENSMUSG00000031382.14	158.131	-1.31173	0.435494	-3.01206	0.00259484	0.0584476	ENSMUSG00000031382	Asb11
ENSMUSG00000020027.18	1341.15	-0.863636	0.287698	-3.00188	0.00268319	0.0598768	ENSMUSG00000020027	Socs2
ENSMUSG00000034990.15	363.36	-0.801165	0.267292	-2.99734	0.00272344	0.060544	ENSMUSG00000034990	Otoa
ENSMUSG00000036432.8	1344.98	-0.516583	0.172418	-2.99611	0.00273447	0.0605995	ENSMUSG00000036432	Siah2
ENSMUSG00000064339.1	34454.1	-0.663679	0.221937	-2.99039	0.00278617	0.0611813	ENSMUSG00000064339	mt-Rnr2
ENSMUSG00000021484.8	5919.93	-0.378219	0.126529	-2.9892	0.00279712	0.0613516	ENSMUSG00000021484	Lman2
ENSMUSG00000058569.8	3491.84	-0.392579	0.131392	-2.98783	0.00280964	0.0614162	ENSMUSG00000058569	Tmed9
ENSMUSG00000037843.6	3338.66	-0.694092	0.232446	-2.98604	0.00282616	0.0615229	ENSMUSG00000037843	Vstm2l
ENSMUSG00000025812.18	1233.25	-0.445033	0.149044	-2.98591	0.00282732	0.0615229	ENSMUSG00000025812	Pard3
ENSMUSG00000049091.6	1695.83	-0.568283	0.190368	-2.98518	0.00283411	0.061601	ENSMUSG00000049091	Sephs2
ENSMUSG00000038564.11	942.667	-0.5646	0.189284	-2.98282	0.00285602	0.0619969	ENSMUSG00000038564	Ift172
ENSMUSG00000028454.16	682.24	-0.527783	0.176958	-2.98253	0.00285877	0.0619969	ENSMUSG00000028454	Pigo
ENSMUSG00000070476.10	345.336	-0.422978	0.14186	-2.98167	0.00286683	0.0620294	ENSMUSG00000070476	Fam217b
ENSMUSG00000041681.2	467710	-0.910444	0.305496	-2.98022	0.00288046	0.0620475	ENSMUSG00000041681	Iapp
ENSMUSG00000034706.16	124.327	-0.672236	0.225784	-2.97733	0.00290766	0.0625635	ENSMUSG00000034706	Dnaic2
ENSMUSG00000005232.11	37086.7	-0.618545	0.208776	-2.96271	0.0030494	0.0651034	ENSMUSG00000005232	G6pc2
ENSMUSG00000042642.13	827.381	-0.371686	0.125713	-2.95663	0.00311022	0.0661817	ENSMUSG00000042642	Flad1
ENSMUSG00000035325.16	5904.03	-0.548413	0.185596	-2.95487	0.003128	0.0662153	ENSMUSG00000035325	Sec31a
ENSMUSG00000027478.15	132.903	-1.26893	0.42958	-2.95388	0.00313805	0.0662605	ENSMUSG00000027478	Dnmt3b
ENSMUSG00000020086.6	463.628	-0.386872	0.131776	-2.93583	0.00332659	0.0693286	ENSMUSG00000020086	Macroh2a2
ENSMUSG00000060224.4	175.281	-0.598147	0.203812	-2.93479	0.00333769	0.0694095	ENSMUSG00000060224	Pyroxd2
ENSMUSG00000043300.2	888.135	-0.93029	0.31738	-2.93115	0.00337705	0.070001	ENSMUSG00000043300	B3galnt1
ENSMUSG00000033105.12	735.55	-0.505768	0.172688	-2.92879	0.00340284	0.0700658	ENSMUSG00000033105	Lss
ENSMUSG00000025237.16	1935.99	-0.544313	0.186135	-2.9243	0.00345233	0.0707984	ENSMUSG00000025237	Parp6
ENSMUSG00000037846.18	108.114	-0.789309	0.270126	-2.922	0.00347793	0.0708823	ENSMUSG00000037846	Rtkn2
ENSMUSG00000068615.4	4687.7	-0.63343	0.21678	-2.92199	0.00347799	0.0708823	ENSMUSG00000068615	Gjd2
ENSMUSG00000027434.11	2950.23	-0.431541	0.147888	-2.91803	0.00352256	0.0714432	ENSMUSG00000027434	Nkx2-2
ENSMUSG00000066839.12	499.064	-0.392465	0.13452	-2.91751	0.00352834	0.0714432	ENSMUSG00000066839	Ecsit
ENSMUSG00000039263.16	2917.21	-0.390347	0.133781	-2.9178	0.00352512	0.0714432	ENSMUSG00000039263	Npepl1
ENSMUSG00000028755.3	504.091	-0.788115	0.270318	-2.91551	0.00355107	0.0716021	ENSMUSG00000028755	Cda
ENSMUSG00000034701.9	3752.05	-0.478228	0.164016	-2.91574	0.00354851	0.0716021	ENSMUSG00000034701	Neurod1
ENSMUSG00000034707.7	7527.49	-0.314341	0.107804	-2.91585	0.00354725	0.0716021	ENSMUSG00000034707	Gns
ENSMUSG00000025815.13	142.357	-0.785305	0.269482	-2.91413	0.00356683	0.0718445	ENSMUSG00000025815	Dhtkd1
ENSMUSG00000050212.4	1370.18	-0.611581	0.211463	-2.89214	0.00382632	0.0759579	ENSMUSG00000050212	Eva1b
ENSMUSG00000056158.14	535.934	-0.787587	0.273299	-2.88177	0.00395443	0.0777785	ENSMUSG00000056158	Car10
ENSMUSG00000045045.7	1414.32	-0.422742	0.146711	-2.88145	0.00395849	0.0777789	ENSMUSG00000045045	Lrfn4
ENSMUSG00000001566.9	604.405	-0.577084	0.200333	-2.88063	0.0039688	0.0779019	ENSMUSG00000001566	Mnx1
ENSMUSG00000036330.12	359.645	-0.67799	0.235648	-2.87712	0.00401319	0.0786128	ENSMUSG00000036330	Slc18a1
ENSMUSG00000020605.9	528.387	-0.404826	0.140901	-2.87313	0.00406432	0.0791308	ENSMUSG00000020605	Hs1bp3
ENSMUSG00000029482.4	1821.89	-0.330484	0.115063	-2.87219	0.00407637	0.0792851	ENSMUSG00000029482	Aacs
ENSMUSG00000074093.4	1810.31	-0.654038	0.227825	-2.87079	0.00409447	0.0795568	ENSMUSG00000074093	Svip
ENSMUSG00000022551.8	1447.31	-0.453089	0.157896	-2.86955	0.00411057	0.0797889	ENSMUSG00000022551	Cyc1
ENSMUSG00000042269.15	471.115	-0.674804	0.235205	-2.86901	0.0041176	0.0798449	ENSMUSG00000042269	Fam92b
ENSMUSG00000025173.13	1182.73	-0.400144	0.139581	-2.86674	0.00414722	0.0803382	ENSMUSG00000025173	Wdr45b
ENSMUSG00000025193.14	248.185	-0.696767	0.243098	-2.8662	0.00415433	0.0803951	ENSMUSG00000025193	Cutc
ENSMUSG00000030082.14	8411.63	-0.393898	0.137475	-2.86523	0.00416701	0.0804785	ENSMUSG00000030082	Sec61a1
ENSMUSG00000078453.3	1066.03	-0.703797	0.246224	-2.85836	0.0042584	0.0819965	ENSMUSG00000078453	Abracl
ENSMUSG00000024236.18	958.338	-0.604765	0.211839	-2.85484	0.00430588	0.0828278	ENSMUSG00000024236	Svil
ENSMUSG00000031951.8	499.838	-0.488025	0.171045	-2.85319	0.00432825	0.0831751	ENSMUSG00000031951	Tmem231
ENSMUSG00000032478.14	162.918	-0.468649	0.164516	-2.84865	0.00439048	0.0839516	ENSMUSG00000032478	Nme6
ENSMUSG00000028670.14	2531.17	-0.422699	0.148474	-2.84695	0.00441399	0.0843173	ENSMUSG00000028670	Lypla2
ENSMUSG00000040562.12	597.195	-0.753212	0.264876	-2.84364	0.0044601	0.084945	ENSMUSG00000040562	Gstm2
ENSMUSG00000039661.14	1381.16	-0.534119	0.187869	-2.84304	0.0044686	0.0850227	ENSMUSG00000039661	Dusp26
ENSMUSG00000002778.14	4120.42	-0.431745	0.151973	-2.84093	0.00449822	0.0855017	ENSMUSG00000002778	Kdelr1
ENSMUSG00000031919.6	1149.81	-1.35684	0.477881	-2.83929	0.00452144	0.0856892	ENSMUSG00000031919	Tmed6
ENSMUSG00000106139.1	474.52	-0.524068	0.184701	-2.83739	0.00454839	0.0859104	ENSMUSG00000106139	Gm30648
ENSMUSG00000068154.5	4528.47	-0.471937	0.16641	-2.83599	0.00456846	0.0860532	ENSMUSG00000068154	Insm1
ENSMUSG00000028098.13	1270.7	-0.412398	0.145583	-2.83273	0.00461523	0.0866978	ENSMUSG00000028098	Rnf115
ENSMUSG00000039000.8	2001.59	-0.407962	0.144248	-2.82821	0.00468097	0.0874205	ENSMUSG00000039000	Ube3c
ENSMUSG00000031576.16	121.181	-0.658127	0.23287	-2.82615	0.00471109	0.0877275	ENSMUSG00000031576	Kcnu1
ENSMUSG00000031985.9	990.169	-0.50445	0.178551	-2.82524	0.00472455	0.0878932	ENSMUSG00000031985	Gnpat
ENSMUSG00000012422.14	1199.13	-0.439663	0.155658	-2.82455	0.00473468	0.0879382	ENSMUSG00000012422	Tmem167
ENSMUSG00000048826.7	1114.54	-0.383204	0.135731	-2.82327	0.00475364	0.0880936	ENSMUSG00000048826	Dact2
ENSMUSG00000037580.10	2933.28	-0.471543	0.16725	-2.81939	0.00481144	0.0890788	ENSMUSG00000037580	Gch1
ENSMUSG00000026269.14	2811.45	-0.490339	0.174437	-2.81098	0.00493904	0.0905695	ENSMUSG00000026269	Rnpepl1
ENSMUSG00000029228.15	386.855	-0.372754	0.132696	-2.80908	0.00496839	0.090841	ENSMUSG00000029228	Lnx1
ENSMUSG00000021203.15	241.432	-0.513447	0.182936	-2.8067	0.00500519	0.0913472	ENSMUSG00000021203	Otub2
ENSMUSG00000074890.4	534.903	-0.421692	0.15031	-2.80549	0.00502408	0.091605	ENSMUSG00000074890	Lcmt2
ENSMUSG00000087200.1	108.744	-0.596684	0.212828	-2.8036	0.00505354	0.0919677	ENSMUSG00000087200	Lrp8os3
ENSMUSG00000050708.16	42474.8	-0.442071	0.158006	-2.79781	0.00514505	0.0932802	ENSMUSG00000050708	Ftl1
ENSMUSG00000027199.14	2322.13	-1.12026	0.400768	-2.79528	0.00518548	0.0939246	ENSMUSG00000027199	Gatm
ENSMUSG00000031490.6	474.308	-0.762787	0.273248	-2.79155	0.00524555	0.0947907	ENSMUSG00000031490	Eif4ebp1
ENSMUSG00000029458.14	827.535	-0.334999	0.12016	-2.78794	0.00530446	0.0953633	ENSMUSG00000029458	Brap
ENSMUSG00000025871.18	5757.76	-0.497582	0.179019	-2.7795	0.00544435	0.0969925	ENSMUSG00000025871	4833439L19Rik
ENSMUSG00000022426.6	920.536	-0.387266	0.139299	-2.78011	0.00543409	0.0969925	ENSMUSG00000022426	Josd1
ENSMUSG00000093661.1	1133.59	-0.491612	0.177067	-2.77642	0.00549611	0.0978012	ENSMUSG00000093661	Eif4e3
ENSMUSG00000042638.14	850.335	-0.584068	0.210431	-2.77558	0.00551026	0.0978558	ENSMUSG00000042638	Gucy2c
ENSMUSG00000052135.8	518.263	-0.427244	0.154063	-2.77317	0.00555135	0.0983295	ENSMUSG00000052135	Foxo6
ENSMUSG00000117901.1	118.692	-0.684457	0.247287	-2.76787	0.00564247	0.0994204	ENSMUSG00000117901	AC109619.1
ENSMUSG00000109321.1	851.142	-0.708118	0.255942	-2.76672	0.00566236	0.0995623	ENSMUSG00000109321	A330076H08Rik

## Sheet: DEseq2_results_allgenes
Supplemental Table 5. Differential Gene expression (Fold change) in MIR125B-Tg versus control islets. All detected genes are shown
Gene.stable.ID.version	baseMean	log2FoldChange	lfcSE	stat	pvalue	padj	Gene.stable.ID	Gene.name
ENSMUSG00000074505.6	138.683	3.71687	0.253674	14.6521	1.31e-48	2.51e-44	ENSMUSG00000074505	Fat3	FAT3
ENSMUSG00000021136.13	1490.66	3.04021	0.220581	13.7827	3.24e-43	3.11e-39	ENSMUSG00000021136	Smoc1	SMOC1
ENSMUSG00000041731.13	198.817	3.38488	0.277844	12.1827	3.85e-34	2.47e-30	ENSMUSG00000041731	Pgm5	PGM5
ENSMUSG00000029121.16	1734.13	1.99499	0.165871	12.0274	2.55e-33	1.23e-29	ENSMUSG00000029121	Crmp1	CRMP1
ENSMUSG00000036198.12	390.749	3.34432	0.293119	11.4094	3.75e-30	1.44e-26	ENSMUSG00000036198	Arhgap36	ARHGAP36
ENSMUSG00000045404.16	146.165	3.07968	0.302104	10.1941	2.11e-24	5.79e-21	ENSMUSG00000045404	Kcnk13	KCNK13
ENSMUSG00000020684.14	251.24	1.80824	0.209976	8.61165	7.2e-18	1.73e-14	ENSMUSG00000020684	Rasl10b	RASL10B
ENSMUSG00000067736.2	168.838	-25.7556	3.02645	-8.51018	1.74e-17	3.71e-14	ENSMUSG00000067736	Gm10222	GM10222
ENSMUSG00000045672.15	1005.12	1.82205	0.222651	8.18343	2.76e-16	5.31e-13	ENSMUSG00000045672	Col27a1	COL27A1
ENSMUSG00000074766.10	38.3494	3.50185	0.430509	8.13421	4.15e-16	7.25e-13	ENSMUSG00000074766	Ism1	ISM1
ENSMUSG00000039395.8	507.264	-1.6927	0.208604	-8.11439	4.88e-16	7.83e-13	ENSMUSG00000039395	Mreg	MREG
ENSMUSG00000028222.2	1835.78	1.52357	0.189282	8.04922	8.33e-16	1.23e-12	ENSMUSG00000028222	Calb1	CALB1
ENSMUSG00000075478.3	50.4656	3.21638	0.402772	7.98561	1.4e-15	1.92e-12	ENSMUSG00000075478	Slitrk1	SLITRK1
ENSMUSG00000031285.14	472.36	1.4429	0.181185	7.96368	1.67e-15	2.14e-12	ENSMUSG00000031285	Dcx	DCX
ENSMUSG00000038463.8	253.209	1.30676	0.164375	7.94989	1.87e-15	2.24e-12	ENSMUSG00000038463	Olfml2b	OLFML2B
ENSMUSG00000036356.15	99.0524	2.18921	0.277006	7.90313	2.72e-15	3.08e-12	ENSMUSG00000036356	Csgalnact1	CSGALNACT1
ENSMUSG00000032091.15	790.71	-1.21207	0.15572	-7.78365	7.05e-15	7.53e-12	ENSMUSG00000032091	Tmprss4	TMPRSS4
ENSMUSG00000086922.2	32.7621	-23.5188	3.02749	-7.76841	7.95e-15	8.05e-12	ENSMUSG00000086922	Gm13835	GM13835
ENSMUSG00000100158.1	74.3047	8.22777	1.06984	7.69063	1.46e-14	1.41e-11	ENSMUSG00000100158	Gm28119	GM28119
ENSMUSG00000090236.3	1216.27	-1.87018	0.245709	-7.61137	2.71e-14	2.48e-11	ENSMUSG00000090236	Car15	CAR15
ENSMUSG00000038370.6	736.083	1.46756	0.19375	7.5745	3.61e-14	3.15e-11	ENSMUSG00000038370	Pcp4l1	PCP4L1
ENSMUSG00000033361.13	122.954	1.81815	0.242149	7.50839	5.99e-14	5.01e-11	ENSMUSG00000033361	Prrg3	PRRG3
ENSMUSG00000074981.13	67.9481	-2.37217	0.318553	-7.44671	9.57e-14	7.67e-11	ENSMUSG00000074981	Dcdc5	DCDC5
ENSMUSG00000031762.7	3297	-1.62812	0.220792	-7.37398	1.66e-13	1.27e-10	ENSMUSG00000031762	Mt2	MT2
ENSMUSG00000099413.1	350.112	-1.33319	0.182413	-7.30865	2.7e-13	2e-10	ENSMUSG00000099413	Gm17767	GM17767
ENSMUSG00000045573.9	2247.6	5.80271	0.814107	7.12771	1.02e-12	7.27e-10	ENSMUSG00000045573	Penk	PENK
ENSMUSG00000099162.1	24.5767	-3.62873	0.512549	-7.07977	1.44e-12	9.92e-10	ENSMUSG00000099162	Gm27168	GM27168
ENSMUSG00000026307.12	2634.11	-0.662829	0.0956868	-6.92707	4.3e-12	2.85e-09	ENSMUSG00000026307	Scly	SCLY
ENSMUSG00000050248.11	117.022	1.87641	0.273347	6.86458	6.67e-12	4.2e-09	ENSMUSG00000050248	Evc2	EVC2
ENSMUSG00000038740.9	410.094	1.02604	0.149519	6.8623	6.78e-12	4.2e-09	ENSMUSG00000038740	Mvb12b	MVB12B
ENSMUSG00000038168.5	202.825	1.65	0.242528	6.80335	1.02e-11	6.14e-09	ENSMUSG00000038168	P3h2	P3H2
ENSMUSG00000038453.17	121.788	2.14367	0.32255	6.64602	3.01e-11	1.76e-08	ENSMUSG00000038453	Srcin1	SRCIN1
ENSMUSG00000032245.12	2818.15	-1.10493	0.166848	-6.6224	3.53e-11	2e-08	ENSMUSG00000032245	Cln6	CLN6
ENSMUSG00000031355.16	275.669	1.56871	0.237391	6.60812	3.89e-11	2.14e-08	ENSMUSG00000031355	Arhgap6	ARHGAP6
ENSMUSG00000044164.2	414.733	-1.4326	0.217799	-6.57762	4.78e-11	2.55e-08	ENSMUSG00000044164	Rnf182	RNF182
ENSMUSG00000031765.8	8234.2	-1.3713	0.216531	-6.33305	2.4e-10	1.25e-07	ENSMUSG00000031765	Mt1	MT1
ENSMUSG00000056174.8	150.23	1.76158	0.279167	6.31013	2.79e-10	1.41e-07	ENSMUSG00000056174	Col8a2	COL8A2
ENSMUSG00000026312.17	244.604	-1.52722	0.243894	-6.2618	3.81e-10	1.88e-07	ENSMUSG00000026312	Cdh7	CDH7
ENSMUSG00000031925.17	291.537	0.928807	0.151619	6.12594	9.02e-10	4.24e-07	ENSMUSG00000031925	Maml2	MAML2
ENSMUSG00000041548.4	684.278	1.18758	0.193877	6.12541	9.05e-10	4.24e-07	ENSMUSG00000041548	Hspb8	HSPB8
ENSMUSG00000041216.15	54.408	1.68405	0.27564	6.10961	9.99e-10	4.57e-07	ENSMUSG00000041216	Clvs1	CLVS1
ENSMUSG00000034164.17	306.976	-1.66746	0.273236	-6.10263	1.04e-09	4.67e-07	ENSMUSG00000034164	Emid1	EMID1
ENSMUSG00000099032.2	429.602	1.73252	0.28748	6.02657	1.67e-09	7.32e-07	ENSMUSG00000099032	Tcf24	TCF24
ENSMUSG00000026473.16	8256.6	-0.711354	0.119297	-5.9629	2.48e-09	1.06e-06	ENSMUSG00000026473	Glul	GLUL
ENSMUSG00000042529.14	106.683	-1.85865	0.313198	-5.93443	2.95e-09	1.21e-06	ENSMUSG00000042529	Kcnj12	KCNJ12
ENSMUSG00000027249.15	80.4322	-1.45908	0.245894	-5.93375	2.96e-09	1.21e-06	ENSMUSG00000027249	F2	F2
ENSMUSG00000028626.5	301.521	1.36023	0.230717	5.89565	3.73e-09	1.5e-06	ENSMUSG00000028626	Col9a2	COL9A2
ENSMUSG00000030077.11	261.638	1.62551	0.27587	5.89231	3.81e-09	1.5e-06	ENSMUSG00000030077	Chl1	CHL1
ENSMUSG00000029273.10	709.478	-1.56394	0.266648	-5.8652	4.49e-09	1.73e-06	ENSMUSG00000029273	Sult1d1	SULT1D1
ENSMUSG00000094910.1	242.751	0.858553	0.146804	5.84829	4.97e-09	1.87e-06	ENSMUSG00000094910	D430019H16Rik	D430019H16RIK
ENSMUSG00000063011.7	1715.56	-1.38548	0.238547	-5.80801	6.32e-09	2.34e-06	ENSMUSG00000063011	Msln	MSLN
ENSMUSG00000037106.8	241.715	-1.57638	0.273729	-5.75891	8.47e-09	3.07e-06	ENSMUSG00000037106	Fer1l6	FER1L6
ENSMUSG00000049939.6	52.7671	1.66898	0.292303	5.70976	1.13e-08	4.03e-06	ENSMUSG00000049939	Lrrc4	LRRC4
ENSMUSG00000044988.7	5784.15	-1.19918	0.210349	-5.7009	1.19e-08	4.17e-06	ENSMUSG00000044988	Ucn3	UCN3
ENSMUSG00000078796.4	35.1825	-1.89079	0.332484	-5.68685	1.29e-08	4.44e-06	ENSMUSG00000078796	Zfp541	ZFP541
ENSMUSG00000021803.10	1491.1	-1.22149	0.215379	-5.67135	1.42e-08	4.78e-06	ENSMUSG00000021803	Cdhr1	CDHR1
ENSMUSG00000074489.9	21.2151	3.29769	0.582206	5.66413	1.48e-08	4.9e-06	ENSMUSG00000074489	Bglap3	BGLAP3
ENSMUSG00000061126.5	169.168	-2.20143	0.389899	-5.64616	1.64e-08	5.35e-06	ENSMUSG00000061126	Cyp4f39	CYP4F39
ENSMUSG00000042429.8	890.324	-0.808358	0.143345	-5.63926	1.71e-08	5.48e-06	ENSMUSG00000042429	Adora1	ADORA1
ENSMUSG00000031066.10	1006.43	0.753958	0.134069	5.62366	1.87e-08	5.9e-06	ENSMUSG00000031066	Usp11	USP11
ENSMUSG00000002997.15	1051.23	-0.907164	0.162102	-5.59624	2.19e-08	6.8e-06	ENSMUSG00000002997	Prkar2b	PRKAR2B
ENSMUSG00000039252.11	671.969	1.09913	0.19782	5.55623	2.76e-08	8.36e-06	ENSMUSG00000039252	Lgi2	LGI2
ENSMUSG00000025127.15	808.073	-1.19963	0.215969	-5.55465	2.78e-08	8.36e-06	ENSMUSG00000025127	Gcgr	GCGR
ENSMUSG00000030406.7	3295.78	-0.985663	0.18165	-5.42617	5.76e-08	1.7e-05	ENSMUSG00000030406	Gipr	GIPR
ENSMUSG00000102758.3	43.8327	2.24844	0.414909	5.41912	5.99e-08	1.75e-05	ENSMUSG00000102758	Naaladl2	NAALADL2
ENSMUSG00000041293.5	17.8019	3.22447	0.59605	5.40973	6.31e-08	1.81e-05	ENSMUSG00000041293	Adgrf1	ADGRF1
ENSMUSG00000060572.17	273.002	1.54857	0.286862	5.39833	6.73e-08	1.9e-05	ENSMUSG00000060572	Mfap2	MFAP2
ENSMUSG00000041078.7	19.3107	2.92322	0.543384	5.37966	7.46e-08	2.08e-05	ENSMUSG00000041078	Grid1	GRID1
ENSMUSG00000020848.7	205.855	1.57445	0.29598	5.31946	1.04e-07	2.86e-05	ENSMUSG00000020848	Doc2b	DOC2B
ENSMUSG00000044453.5	2004.52	-1.21937	0.229419	-5.31504	1.07e-07	2.89e-05	ENSMUSG00000044453	Ffar1	FFAR1
ENSMUSG00000038540.14	56.5106	2.00653	0.378994	5.29436	1.19e-07	3.19e-05	ENSMUSG00000038540	Tmc3	TMC3
ENSMUSG00000029168.14	223.822	1.55705	0.295354	5.27183	1.35e-07	3.56e-05	ENSMUSG00000029168	Dpysl5	DPYSL5
ENSMUSG00000039116.7	195.923	1.43025	0.274129	5.21743	1.81e-07	4.72e-05	ENSMUSG00000039116	Adgrg6	ADGRG6
ENSMUSG00000019429.7	249.654	-1.39847	0.268492	-5.20862	1.9e-07	4.88e-05	ENSMUSG00000019429	Ffar3	FFAR3
ENSMUSG00000031075.19	459.66	1.2691	0.244223	5.1965	2.03e-07	5.14e-05	ENSMUSG00000031075	Ano1	ANO1
ENSMUSG00000000214.11	628.894	-1.74508	0.336068	-5.19262	2.07e-07	5.18e-05	ENSMUSG00000000214	Th	TH
ENSMUSG00000052373.14	373.519	-1.22065	0.235975	-5.1728	2.31e-07	5.69e-05	ENSMUSG00000052373	Mpp3	MPP3
ENSMUSG00000032356.12	2231.65	-0.827044	0.16012	-5.16517	2.4e-07	5.85e-05	ENSMUSG00000032356	Rasgrf1	RASGRF1
ENSMUSG00000029120.10	254.579	0.892665	0.173243	5.15267	2.57e-07	6.17e-05	ENSMUSG00000029120	Ppp2r2c	PPP2R2C
ENSMUSG00000029919.5	167.468	-1.33207	0.259053	-5.14207	2.72e-07	6.43e-05	ENSMUSG00000029919	Hpgds	HPGDS
ENSMUSG00000028749.7	4268.71	-0.764127	0.148655	-5.14029	2.74e-07	6.43e-05	ENSMUSG00000028749	Pla2g2f	PLA2G2F
ENSMUSG00000061080.11	123.063	1.85599	0.361209	5.13827	2.77e-07	6.43e-05	ENSMUSG00000061080	Lsamp	LSAMP
ENSMUSG00000016382.15	925.673	1.03098	0.200787	5.13472	2.83e-07	6.47e-05	ENSMUSG00000016382	Pls3	PLS3
ENSMUSG00000026840.14	81.2399	1.36926	0.268142	5.10648	3.28e-07	7.43e-05	ENSMUSG00000026840	Lamc3	LAMC3
ENSMUSG00000058488.7	1501.71	1.48214	0.290655	5.0993	3.41e-07	7.63e-05	ENSMUSG00000058488	Kl	KL
ENSMUSG00000033170.14	415.092	1.3658	0.269121	5.07504	3.87e-07	8.57e-05	ENSMUSG00000033170	Card10	CARD10
ENSMUSG00000028005.13	372.52	0.73594	0.145176	5.0693	3.99e-07	8.73e-05	ENSMUSG00000028005	Gucy1b1	GUCY1B1
ENSMUSG00000033059.7	1006.17	1.1355	0.224623	5.05513	4.3e-07	9.3e-05	ENSMUSG00000033059	Pygb	PYGB
ENSMUSG00000027560.4	103.62	-0.944754	0.187428	-5.04062	4.64e-07	9.83e-05	ENSMUSG00000027560	Dok5	DOK5
ENSMUSG00000026156.8	65.9831	-1.64423	0.326225	-5.04018	4.65e-07	9.83e-05	ENSMUSG00000026156	B3gat2	B3GAT2
ENSMUSG00000050473.5	543.239	-0.934559	0.185729	-5.03186	4.86e-07	0.000101565	ENSMUSG00000050473	Slc35d3	SLC35D3
ENSMUSG00000044254.6	647.391	-0.696899	0.138798	-5.02094	5.14e-07	0.000106352	ENSMUSG00000044254	Pcsk9	PCSK9
ENSMUSG00000021913.8	3113.36	-0.814476	0.162668	-5.00697	5.53e-07	0.000113149	ENSMUSG00000021913	Ogdhl	OGDHL
ENSMUSG00000018387.12	122.76	1.18274	0.238492	4.95923	7.08e-07	0.000142674	ENSMUSG00000018387	Shroom1	SHROOM1
ENSMUSG00000022129.4	247.482	-1.37195	0.276735	-4.95763	7.14e-07	0.000142674	ENSMUSG00000022129	Dct	DCT
ENSMUSG00000031891.6	24.5106	2.29573	0.463297	4.95521	7.23e-07	0.000142674	ENSMUSG00000031891	Hsd11b2	HSD11B2
ENSMUSG00000059974.10	213.347	1.73059	0.349366	4.95351	7.29e-07	0.000142674	ENSMUSG00000059974	Ntm	NTM
ENSMUSG00000023067.14	930.006	0.961822	0.194226	4.95207	7.34e-07	0.000142674	ENSMUSG00000023067	Cdkn1a	CDKN1A
ENSMUSG00000028019.9	167.257	2.03999	0.412402	4.94659	7.55e-07	0.000145277	ENSMUSG00000028019	Pdgfc	PDGFC
ENSMUSG00000041842.15	510.03	-0.970926	0.196439	-4.94263	7.71e-07	0.000146798	ENSMUSG00000041842	Fhdc1	FHDC1
ENSMUSG00000018470.8	385.694	-0.976709	0.197971	-4.9336	8.07e-07	0.000150767	ENSMUSG00000018470	Kcnab3	KCNAB3
ENSMUSG00000037005.16	58.5787	3.04835	0.622079	4.90026	9.57e-07	0.000177026	ENSMUSG00000037005	Xpnpep2	XPNPEP2
ENSMUSG00000023017.10	1300.42	-0.846516	0.172969	-4.89403	9.88e-07	0.000180987	ENSMUSG00000023017	Asic1	ASIC1
ENSMUSG00000044033.16	87.7263	2.3613	0.483951	4.87921	1.07e-06	0.000193288	ENSMUSG00000044033	Ccdc141	CCDC141
ENSMUSG00000000544.14	353.91	-0.882695	0.181163	-4.87238	1.1e-06	0.000198227	ENSMUSG00000000544	Gpa33	GPA33
ENSMUSG00000054162.15	211.402	1.27965	0.262912	4.86721	1.13e-06	0.000200444	ENSMUSG00000054162	Spock3	SPOCK3
ENSMUSG00000028878.11	1118.46	-0.50858	0.104506	-4.86652	1.14e-06	0.000200444	ENSMUSG00000028878	Fam76a	FAM76A
ENSMUSG00000032033.11	159.474	1.95264	0.40284	4.84718	1.25e-06	0.000215077	ENSMUSG00000032033	Barx2	BARX2
ENSMUSG00000074240.5	541.758	-1.72504	0.355883	-4.84722	1.25e-06	0.000215077	ENSMUSG00000074240	Cib3	CIB3
ENSMUSG00000072966.11	2450.02	0.627332	0.129997	4.82575	1.39e-06	0.000237261	ENSMUSG00000072966	Gprasp2	GPRASP2
ENSMUSG00000009210.10	52.2147	-2.27319	0.471211	-4.82414	1.41e-06	0.000237261	ENSMUSG00000009210	Prr29	PRR29
ENSMUSG00000007038.5	2226.48	-0.606039	0.125722	-4.82047	1.43e-06	0.000238822	ENSMUSG00000007038	Neu1	NEU1
ENSMUSG00000078670.3	7020.67	-0.576449	0.119611	-4.81936	1.44e-06	0.000238822	ENSMUSG00000078670	Fam174b	FAM174B
ENSMUSG00000022286.16	93.0234	1.46398	0.303984	4.816	1.46e-06	0.000240808	ENSMUSG00000022286	Grhl2	GRHL2
ENSMUSG00000024558.12	193.226	1.52819	0.317493	4.81329	1.48e-06	0.000242019	ENSMUSG00000024558	Mapk4	MAPK4
ENSMUSG00000029188.14	29.4461	2.4692	0.514193	4.80208	1.57e-06	0.000252842	ENSMUSG00000029188	Slc34a2	SLC34A2
ENSMUSG00000051537.9	47.9426	1.53488	0.319689	4.80118	1.58e-06	0.000252842	ENSMUSG00000051537	Gm5124	GM5124
ENSMUSG00000045763.8	489.277	0.929802	0.193932	4.79447	1.63e-06	0.000259297	ENSMUSG00000045763	Basp1	BASP1
ENSMUSG00000035638.14	39.8699	1.88217	0.393279	4.78584	1.7e-06	0.000268476	ENSMUSG00000035638	Muc20	MUC20
ENSMUSG00000094893.2	80.1149	-1.7004	0.355708	-4.78033	1.75e-06	0.000273689	ENSMUSG00000094893	Gm4791	GM4791
ENSMUSG00000024064.14	1085.21	-0.8478	0.177878	-4.76618	1.88e-06	0.000291166	ENSMUSG00000024064	Galnt14	GALNT14
ENSMUSG00000008489.18	108.531	1.70784	0.358441	4.76462	1.89e-06	0.000291166	ENSMUSG00000008489	Elavl2	ELAVL2
ENSMUSG00000039470.15	5039.83	-0.824861	0.173247	-4.76118	1.92e-06	0.000293828	ENSMUSG00000039470	Zdhhc2	ZDHHC2
ENSMUSG00000000531.5	255.779	0.779849	0.164452	4.7421	2.12e-06	0.000318938	ENSMUSG00000000531	Grasp	GRASP
ENSMUSG00000022941.8	509.092	-0.892582	0.188252	-4.74142	2.12e-06	0.000318938	ENSMUSG00000022941	Ripply3	RIPPLY3
ENSMUSG00000029830.15	57.5835	1.33115	0.28104	4.73652	2.17e-06	0.000324211	ENSMUSG00000029830	Svopl	SVOPL
ENSMUSG00000010660.3	129.338	0.944496	0.200262	4.7163	2.4e-06	0.000355382	ENSMUSG00000010660	Plcd1	PLCD1
ENSMUSG00000022842.18	901.859	0.943866	0.200605	4.7051	2.54e-06	0.000372586	ENSMUSG00000022842	Ece2	ECE2
ENSMUSG00000028373.16	52.1921	1.26428	0.268809	4.70326	2.56e-06	0.000373112	ENSMUSG00000028373	Astn2	ASTN2
ENSMUSG00000042846.8	29.1343	2.50622	0.534975	4.68473	2.8e-06	0.000405439	ENSMUSG00000042846	Lrrtm3	LRRTM3
ENSMUSG00000021364.16	332.391	-0.794569	0.169923	-4.67604	2.92e-06	0.000419837	ENSMUSG00000021364	Elovl2	ELOVL2
ENSMUSG00000040797.16	56.4695	1.56745	0.336088	4.66382	3.1e-06	0.000437673	ENSMUSG00000040797	Iqsec3	IQSEC3
ENSMUSG00000000627.15	229.505	1.01017	0.216634	4.66301	3.12e-06	0.000437673	ENSMUSG00000000627	Sema4f	SEMA4F
ENSMUSG00000104283.1	209.045	-1.83581	0.393701	-4.66295	3.12e-06	0.000437673	ENSMUSG00000104283	Gm37459	GM37459
ENSMUSG00000002489.16	294.41	1.43173	0.30794	4.64938	3.33e-06	0.00046408	ENSMUSG00000002489	Tiam1	TIAM1
ENSMUSG00000053963.7	203.463	1.86638	0.401937	4.64346	3.43e-06	0.000473708	ENSMUSG00000053963	Stum	STUM
ENSMUSG00000031302.16	95.9161	1.19028	0.256419	4.64195	3.45e-06	0.000473708	ENSMUSG00000031302	Nlgn3	NLGN3
ENSMUSG00000004633.17	73.7088	1.29131	0.278257	4.6407	3.47e-06	0.000473708	ENSMUSG00000004633	Chn2	CHN2
ENSMUSG00000034282.3	910.056	1.18439	0.255329	4.63868	3.51e-06	0.000474986	ENSMUSG00000034282	Evpl	EVPL
ENSMUSG00000090291.3	1762.69	-0.629591	0.136029	-4.62836	3.69e-06	0.000495795	ENSMUSG00000090291	Lrrc10b	LRRC10B
ENSMUSG00000047414.6	165.765	1.414	0.305717	4.62521	3.74e-06	0.000499899	ENSMUSG00000047414	Flrt2	FLRT2
ENSMUSG00000023827.8	447.753	0.94859	0.205372	4.61889	3.86e-06	0.000511804	ENSMUSG00000023827	Agpat4	AGPAT4
ENSMUSG00000021340.13	703.542	0.99574	0.215911	4.6118	3.99e-06	0.000522759	ENSMUSG00000021340	Gpld1	GPLD1
ENSMUSG00000028804.20	199.337	1.07123	0.232288	4.61165	3.99e-06	0.000522759	ENSMUSG00000028804	Csmd2	CSMD2
ENSMUSG00000024553.8	618.731	-0.534488	0.11605	-4.60568	4.11e-06	0.00053435	ENSMUSG00000024553	Galr1	GALR1
ENSMUSG00000079620.13	1019.4	-1.25735	0.273132	-4.60346	4.16e-06	0.00053646	ENSMUSG00000079620	Muc4	MUC4
ENSMUSG00000034488.14	61.6725	1.23285	0.268026	4.59972	4.23e-06	0.000542518	ENSMUSG00000034488	Edil3	EDIL3
ENSMUSG00000040181.14	263.538	-1.01906	0.222228	-4.58567	4.53e-06	0.000576482	ENSMUSG00000040181	Fmo1	FMO1
ENSMUSG00000048285.9	236.057	0.861316	0.188019	4.581	4.63e-06	0.000584754	ENSMUSG00000048285	Frmd6	FRMD6
ENSMUSG00000025366.8	5302.41	-0.753361	0.164491	-4.57994	4.65e-06	0.000584754	ENSMUSG00000025366	Esyt1	ESYT1
ENSMUSG00000020436.17	28.2917	1.78987	0.392132	4.56446	5.01e-06	0.000625523	ENSMUSG00000020436	Gabrg2	GABRG2
ENSMUSG00000074207.10	2274.27	-1.24451	0.273086	-4.55721	5.18e-06	0.000642137	ENSMUSG00000074207	Adh1	ADH1
ENSMUSG00000074892.9	570.17	-1.07088	0.235094	-4.55513	5.24e-06	0.000642137	ENSMUSG00000074892	B3galt5	B3GALT5
ENSMUSG00000039005.13	51.367	1.49592	0.328455	4.55443	5.25e-06	0.000642137	ENSMUSG00000039005	Tlr4	TLR4
ENSMUSG00000012350.15	673.431	1.44642	0.317646	4.55357	5.27e-06	0.000642137	ENSMUSG00000012350	Ehf	EHF
ENSMUSG00000046593.3	3173.14	-0.975961	0.214423	-4.55157	5.32e-06	0.000642944	ENSMUSG00000046593	Tmem215	TMEM215
ENSMUSG00000028519.16	50.4671	1.96065	0.43085	4.55066	5.35e-06	0.000642944	ENSMUSG00000028519	Dab1	DAB1
ENSMUSG00000004031.13	59.8376	1.27957	0.28133	4.54828	5.41e-06	0.000646215	ENSMUSG00000004031	Brinp2	BRINP2
ENSMUSG00000023905.15	273.353	0.784784	0.172906	4.53878	5.66e-06	0.00067019	ENSMUSG00000023905	Tnfrsf12a	TNFRSF12A
ENSMUSG00000034098.14	76.1612	1.32624	0.292252	4.538	5.68e-06	0.00067019	ENSMUSG00000034098	Fstl5	FSTL5
ENSMUSG00000034796.14	69.8033	1.49147	0.328873	4.53509	5.76e-06	0.000675357	ENSMUSG00000034796	Cpne7	CPNE7
ENSMUSG00000036306.13	45.3353	1.80692	0.398615	4.53299	5.82e-06	0.000677974	ENSMUSG00000036306	Lzts1	LZTS1
ENSMUSG00000058159.14	230.276	-1.33716	0.295106	-4.5311	5.87e-06	0.000679943	ENSMUSG00000058159	T2	T2
ENSMUSG00000009246.14	2745.12	-1.60357	0.35477	-4.52003	6.18e-06	0.000712202	ENSMUSG00000009246	Trpm5	TRPM5
ENSMUSG00000025203.6	3383.43	0.519836	0.11511	4.516	6.3e-06	0.000721568	ENSMUSG00000025203	Scd2	SCD2
ENSMUSG00000044716.12	110.377	-1.5099	0.335207	-4.50438	6.66e-06	0.000755661	ENSMUSG00000044716	Dok7	DOK7
ENSMUSG00000025272.16	274.283	1.28861	0.286123	4.50369	6.68e-06	0.000755661	ENSMUSG00000025272	Tro	TRO
ENSMUSG00000027254.13	511.56	1.51109	0.335705	4.50124	6.76e-06	0.000759957	ENSMUSG00000027254	Map1a	MAP1A
ENSMUSG00000028172.5	26.155	2.39861	0.533718	4.49416	6.98e-06	0.000776831	ENSMUSG00000028172	Tacr3	TACR3
ENSMUSG00000043259.15	113.123	0.915411	0.203692	4.4941	6.99e-06	0.000776831	ENSMUSG00000043259	Fam13c	FAM13C
ENSMUSG00000030551.14	366.221	0.98583	0.219588	4.48945	7.14e-06	0.000785817	ENSMUSG00000030551	Nr2f2	NR2F2
ENSMUSG00000021999.9	319.299	-1.10512	0.246172	-4.4892	7.15e-06	0.000785817	ENSMUSG00000021999	Cpb2	CPB2
ENSMUSG00000040511.14	192.51	0.82079	0.183975	4.46142	8.14e-06	0.000886182	ENSMUSG00000040511	Pvr	PVR
ENSMUSG00000015134.15	149.624	2.09929	0.470578	4.46109	8.15e-06	0.000886182	ENSMUSG00000015134	Aldh1a3	ALDH1A3
ENSMUSG00000043333.12	267.886	-0.879237	0.197414	-4.45377	8.44e-06	0.000911821	ENSMUSG00000043333	Rhbdl2	RHBDL2
ENSMUSG00000042751.14	116.874	1.78989	0.402369	4.44839	8.65e-06	0.000927744	ENSMUSG00000042751	Nmnat2	NMNAT2
ENSMUSG00000040170.13	401.164	1.23416	0.277485	4.44765	8.68e-06	0.000927744	ENSMUSG00000040170	Fmo2	FMO2
ENSMUSG00000051209.3	488.385	-1.11233	0.2502	-4.44577	8.76e-06	0.000930737	ENSMUSG00000051209	Gpr119	GPR119
ENSMUSG00000012819.15	20.8962	3.3459	0.75357	4.44006	8.99e-06	0.000950518	ENSMUSG00000012819	Cdh23	CDH23
ENSMUSG00000020732.13	3250.68	-0.870967	0.196359	-4.43558	9.18e-06	0.000965212	ENSMUSG00000020732	Rab37	RAB37
ENSMUSG00000009545.14	413.021	1.07711	0.242974	4.43302	9.29e-06	0.000971436	ENSMUSG00000009545	Kcnq1	KCNQ1
ENSMUSG00000021700.10	512.215	0.896307	0.20237	4.42906	9.46e-06	0.000978831	ENSMUSG00000021700	Rab3c	RAB3C
ENSMUSG00000062661.6	319.717	1.15071	0.259801	4.42921	9.46e-06	0.000978831	ENSMUSG00000062661	Ncs1	NCS1
ENSMUSG00000018411.17	2262.75	0.724127	0.16388	4.41864	9.93e-06	0.00102171	ENSMUSG00000018411	Mapt	MAPT
ENSMUSG00000049723.14	48.3341	-1.72559	0.390886	-4.41455	1.01e-05	0.00103566	ENSMUSG00000049723	Mmp12	MMP12
ENSMUSG00000096257.2	7.32381	4.27655	0.970121	4.40826	1.04e-05	0.00106055	ENSMUSG00000096257	Ccer2	CCER2
ENSMUSG00000049999.4	222.042	-0.76053	0.172693	-4.40394	1.06e-05	0.00107621	ENSMUSG00000049999	Ppp1r3d	PPP1R3D
ENSMUSG00000093789.3	9.49773	5.81087	1.31987	4.40261	1.07e-05	0.0010772	ENSMUSG00000093789	Methig1	METHIG1
ENSMUSG00000005800.3	3.8445	5.11985	1.16322	4.40145	1.08e-05	0.00107731	ENSMUSG00000005800	Mmp8	MMP8
ENSMUSG00000022762.18	83.3734	1.78975	0.407561	4.39137	1.13e-05	0.00112263	ENSMUSG00000022762	Ncam2	NCAM2
ENSMUSG00000042367.12	22.0184	2.12993	0.485415	4.38784	1.14e-05	0.00113512	ENSMUSG00000042367	Gjb3	GJB3
ENSMUSG00000030525.8	24.9579	2.54812	0.581889	4.37905	1.19e-05	0.00117583	ENSMUSG00000030525	Chrna7	CHRNA7
ENSMUSG00000018849.6	761.105	1.08634	0.248446	4.37253	1.23e-05	0.00120537	ENSMUSG00000018849	Wwc1	WWC1
ENSMUSG00000031227.8	1098.46	0.582443	0.133344	4.36796	1.25e-05	0.00122461	ENSMUSG00000031227	Magee1	MAGEE1
ENSMUSG00000035557.9	83.7263	2.33979	0.536931	4.35771	1.31e-05	0.00127685	ENSMUSG00000035557	Krt17	KRT17
ENSMUSG00000023945.7	212.382	1.91604	0.439819	4.35644	1.32e-05	0.00127785	ENSMUSG00000023945	Slc5a7	SLC5A7
ENSMUSG00000037788.14	487.846	0.822106	0.188863	4.35292	1.34e-05	0.00129204	ENSMUSG00000037788	Vopp1	VOPP1
ENSMUSG00000034685.4	98.489	1.30305	0.299646	4.34864	1.37e-05	0.0013045	ENSMUSG00000034685	Fam171a2	FAM171A2
ENSMUSG00000074657.5	463.842	1.17852	0.270972	4.34923	1.37e-05	0.0013045	ENSMUSG00000074657	Kif5a	KIF5A
ENSMUSG00000027168.21	6122.92	-0.6249	0.143749	-4.34717	1.38e-05	0.00130676	ENSMUSG00000027168	Pax6	PAX6
ENSMUSG00000033209.17	1464.47	-0.752788	0.173289	-4.34412	1.4e-05	0.00131856	ENSMUSG00000033209	Ttc28	TTC28
ENSMUSG00000020607.7	175.551	1.15838	0.266753	4.34251	1.41e-05	0.00132079	ENSMUSG00000020607	Lratd1	LRATD1
ENSMUSG00000045991.19	377.071	1.79021	0.412337	4.34161	1.41e-05	0.00132079	ENSMUSG00000045991	Onecut2	ONECUT2
ENSMUSG00000097789.2	211.192	1.01694	0.234473	4.3371	1.44e-05	0.00134163	ENSMUSG00000097789	Gm2115	GM2115
ENSMUSG00000114278.2	77.4354	1.60498	0.370553	4.33132	1.48e-05	0.00137076	ENSMUSG00000114278	Gm49027	GM49027
ENSMUSG00000043384.15	7789.22	0.79337	0.183288	4.32856	1.5e-05	0.00138141	ENSMUSG00000043384	Gprasp1	GPRASP1
ENSMUSG00000036111.8	78.4	-1.20264	0.278052	-4.32524	1.52e-05	0.00139566	ENSMUSG00000036111	Lmo1	LMO1
ENSMUSG00000042761.14	42.8877	1.76782	0.40894	4.32294	1.54e-05	0.00139701	ENSMUSG00000042761	Mrap2	MRAP2
ENSMUSG00000021253.7	380.979	1.5482	0.358397	4.3198	1.56e-05	0.00141039	ENSMUSG00000021253	Tgfb3	TGFB3
ENSMUSG00000020057.2	171.885	1.04172	0.241638	4.31108	1.62e-05	0.00145349	ENSMUSG00000020057	Dram1	DRAM1
ENSMUSG00000038670.11	150.694	2.18606	0.506979	4.31193	1.62e-05	0.00145349	ENSMUSG00000038670	Mybpc2	MYBPC2
ENSMUSG00000028427.13	61.7903	-1.13089	0.262653	-4.30563	1.67e-05	0.00148288	ENSMUSG00000028427	Aqp7	AQP7
ENSMUSG00000027230.9	1466.39	-0.57302	0.133173	-4.30281	1.69e-05	0.00149496	ENSMUSG00000027230	Creb3l1	CREB3L1
ENSMUSG00000044139.12	16588.5	-0.630206	0.146874	-4.29079	1.78e-05	0.00156383	ENSMUSG00000044139	Prss53	PRSS53
ENSMUSG00000045284.9	1224.57	-0.830509	0.19353	-4.29138	1.78e-05	0.00156383	ENSMUSG00000045284	Dcaf12l1	DCAF12L1
ENSMUSG00000021416.11	82.6409	-1.10733	0.258611	-4.28184	1.85e-05	0.00161522	ENSMUSG00000021416	Eci3	ECI3
ENSMUSG00000073910.10	127.085	0.939064	0.219326	4.28158	1.86e-05	0.00161522	ENSMUSG00000073910	Mob3b	MOB3B
ENSMUSG00000021097.15	524.212	1.16663	0.272786	4.27674	1.9e-05	0.00164332	ENSMUSG00000021097	Clmn	CLMN
ENSMUSG00000114425.1	78.0152	-1.57001	0.367439	-4.27286	1.93e-05	0.00166325	ENSMUSG00000114425	Gm33447	GM33447
ENSMUSG00000069806.5	76.2233	1.24682	0.291855	4.27205	1.94e-05	0.00166325	ENSMUSG00000069806	Cacng7	CACNG7
ENSMUSG00000039372.5	682.028	-0.695101	0.162968	-4.26526	2e-05	0.00169945	ENSMUSG00000039372	Marchf4	MARCHF4
ENSMUSG00000036062.13	38.2734	2.41242	0.566281	4.2601	2.04e-05	0.00172178	ENSMUSG00000036062	Phf24	PHF24
ENSMUSG00000035835.14	32.4589	1.48888	0.349516	4.25984	2.05e-05	0.00172178	ENSMUSG00000035835	Plppr3	PLPPR3
ENSMUSG00000032479.15	2015.62	0.654796	0.153765	4.25843	2.06e-05	0.00172178	ENSMUSG00000032479	Map4	MAP4
ENSMUSG00000047205.12	991.686	-0.504966	0.118573	-4.25868	2.06e-05	0.00172178	ENSMUSG00000047205	Dusp18	DUSP18
ENSMUSG00000035184.15	117.934	1.68601	0.396457	4.2527	2.11e-05	0.00175881	ENSMUSG00000035184	Fam124a	FAM124A
ENSMUSG00000039419.17	684.672	-0.884422	0.208068	-4.25063	2.13e-05	0.00176744	ENSMUSG00000039419	Cntnap2	CNTNAP2
ENSMUSG00000027690.13	7202.97	-0.948814	0.223411	-4.24695	2.17e-05	0.00177736	ENSMUSG00000027690	Slc2a2	SLC2A2
ENSMUSG00000030621.17	307.827	1.04883	0.246986	4.24654	2.17e-05	0.00177736	ENSMUSG00000030621	Me3	ME3
ENSMUSG00000031255.14	4046.32	-0.778729	0.183381	-4.2465	2.17e-05	0.00177736	ENSMUSG00000031255	Sytl4	SYTL4
ENSMUSG00000046447.3	14125.3	-0.938377	0.22116	-4.24298	2.21e-05	0.00179785	ENSMUSG00000046447	Camk2n1	CAMK2N1
ENSMUSG00000001435.15	516.284	1.38803	0.327603	4.23692	2.27e-05	0.00183928	ENSMUSG00000001435	Col18a1	COL18A1
ENSMUSG00000030806.6	70.7896	1.39221	0.329047	4.23104	2.33e-05	0.0018801	ENSMUSG00000030806	Stx1b	STX1B
ENSMUSG00000042589.18	734.863	-0.946165	0.223801	-4.22771	2.36e-05	0.00189767	ENSMUSG00000042589	Cux2	CUX2
ENSMUSG00000032724.5	178.018	1.1075	0.262002	4.22706	2.37e-05	0.00189767	ENSMUSG00000032724	Abtb2	ABTB2
ENSMUSG00000037706.17	3321.52	0.604405	0.143051	4.2251	2.39e-05	0.00190075	ENSMUSG00000037706	Cd81	CD81
ENSMUSG00000111761.1	45.0174	-1.39493	0.330175	-4.22483	2.39e-05	0.00190075	ENSMUSG00000111761	9230112J17Rik	9230112J17RIK
ENSMUSG00000045629.8	53.5271	1.0648	0.252258	4.22109	2.43e-05	0.00192462	ENSMUSG00000045629	Sh3tc2	SH3TC2
ENSMUSG00000034324.16	13.8883	2.35714	0.558603	4.21971	2.45e-05	0.00192843	ENSMUSG00000034324	Tmem132c	TMEM132C
ENSMUSG00000029644.7	2581.91	-0.678262	0.161681	-4.19506	2.73e-05	0.00214188	ENSMUSG00000029644	Pdx1	PDX1
ENSMUSG00000024712.9	2275.8	-0.583644	0.139161	-4.19403	2.74e-05	0.00214286	ENSMUSG00000024712	Rfk	RFK
ENSMUSG00000052911.9	769.173	0.999195	0.238309	4.19286	2.75e-05	0.00214522	ENSMUSG00000052911	Lamb2	LAMB2
ENSMUSG00000068122.10	5.88495	5.1013	1.22069	4.17903	2.93e-05	0.00227074	ENSMUSG00000068122	Agtr2	AGTR2
ENSMUSG00000087593.1	83.624	-1.26401	0.303765	-4.16113	3.17e-05	0.00244644	ENSMUSG00000087593	Gm16174	GM16174
ENSMUSG00000026969.3	31.6841	-2.27793	0.550081	-4.14108	3.46e-05	0.0026597	ENSMUSG00000026969	Fam166a	FAM166A
ENSMUSG00000036815.17	598.593	1.27631	0.308432	4.13806	3.5e-05	0.00268432	ENSMUSG00000036815	Dpp10	DPP10
ENSMUSG00000026604.17	291.263	1.06389	0.257233	4.13592	3.54e-05	0.00269865	ENSMUSG00000026604	Ptpn14	PTPN14
ENSMUSG00000045378.5	24.3109	-1.51789	0.368055	-4.12407	3.72e-05	0.00283016	ENSMUSG00000045378	Pxt1	PXT1
ENSMUSG00000040856.17	376.795	1.91707	0.464961	4.12309	3.74e-05	0.00283108	ENSMUSG00000040856	Dlk1	DLK1
ENSMUSG00000039457.4	582.693	0.802318	0.194653	4.12177	3.76e-05	0.00283611	ENSMUSG00000039457	Ppl	PPL
ENSMUSG00000027674.16	1584.96	0.478117	0.116151	4.11632	3.85e-05	0.00288138	ENSMUSG00000027674	Pex5l	PEX5L
ENSMUSG00000032667.17	753.293	-0.612324	0.148749	-4.1165	3.85e-05	0.00288138	ENSMUSG00000032667	Pon2	PON2
ENSMUSG00000112022.2	26.3984	7.8883	1.91775	4.1133	3.9e-05	0.00290805	ENSMUSG00000112022	Gm2436	GM2436
ENSMUSG00000039910.10	1875.15	-1.05967	0.258009	-4.10712	4.01e-05	0.00297549	ENSMUSG00000039910	Cited2	CITED2
ENSMUSG00000029710.15	484.672	0.776445	0.189292	4.10183	4.1e-05	0.00302498	ENSMUSG00000029710	Ephb4	EPHB4
ENSMUSG00000052539.15	286.367	1.01547	0.247614	4.10101	4.11e-05	0.00302498	ENSMUSG00000052539	Magi3	MAGI3
ENSMUSG00000029122.11	175.263	1.23921	0.302198	4.10064	4.12e-05	0.00302498	ENSMUSG00000029122	Evc	EVC
ENSMUSG00000038296.14	1322.21	-0.756319	0.18465	-4.09597	4.2e-05	0.00307014	ENSMUSG00000038296	Galnt18	GALNT18
ENSMUSG00000057286.6	404.499	0.973625	0.237733	4.09545	4.21e-05	0.00307014	ENSMUSG00000057286	St6galnac2	ST6GALNAC2
ENSMUSG00000028753.12	102.384	-1.38207	0.337609	-4.09369	4.25e-05	0.00308184	ENSMUSG00000028753	Vwa5b1	VWA5B1
ENSMUSG00000035964.8	1820.59	1.05482	0.257857	4.0907	4.3e-05	0.00311004	ENSMUSG00000035964	Tmem59l	TMEM59L
ENSMUSG00000024027.8	9270.61	-0.810405	0.198271	-4.08736	4.36e-05	0.00314337	ENSMUSG00000024027	Glp1r	GLP1R
ENSMUSG00000074344.7	189.741	-1.63719	0.400918	-4.08362	4.43e-05	0.00318258	ENSMUSG00000074344	Tmigd3	TMIGD3
ENSMUSG00000039385.5	170.898	1.90313	0.466369	4.08074	4.49e-05	0.00320241	ENSMUSG00000039385	Cdh6	CDH6
ENSMUSG00000052415.5	16.5731	2.27395	0.557281	4.08044	4.49e-05	0.00320241	ENSMUSG00000052415	Tchh	TCHH
ENSMUSG00000043913.14	13.7494	2.1105	0.51848	4.07055	4.69e-05	0.00332919	ENSMUSG00000043913	Ccdc60	CCDC60
ENSMUSG00000022096.14	212.563	1.15578	0.284065	4.06873	4.73e-05	0.00334303	ENSMUSG00000022096	Hr	HR
ENSMUSG00000075307.3	13.4542	2.33344	0.573871	4.06614	4.78e-05	0.00336798	ENSMUSG00000075307	Klhl41	KLHL41
ENSMUSG00000026617.16	2287.46	-0.524164	0.128945	-4.06503	4.8e-05	0.00337172	ENSMUSG00000026617	Bpnt1	BPNT1
ENSMUSG00000062380.4	1643.61	1.13411	0.279821	4.05298	5.06e-05	0.00353531	ENSMUSG00000062380	Tubb3	TUBB3
ENSMUSG00000039410.16	187.64	1.17957	0.291089	4.05226	5.07e-05	0.00353531	ENSMUSG00000039410	Prdm16	PRDM16
ENSMUSG00000015217.11	265.219	0.90233	0.223108	4.04436	5.25e-05	0.00364342	ENSMUSG00000015217	Hmgb3	HMGB3
ENSMUSG00000001507.16	1638.02	0.638899	0.158016	4.04326	5.27e-05	0.00364619	ENSMUSG00000001507	Itga3	ITGA3
ENSMUSG00000029361.18	395.197	1.71493	0.424226	4.0425	5.29e-05	0.00364619	ENSMUSG00000029361	Nos1	NOS1
ENSMUSG00000038267.15	1568.19	-0.834509	0.206728	-4.03675	5.42e-05	0.00372327	ENSMUSG00000038267	Slc22a23	SLC22A23
ENSMUSG00000037942.5	67.1452	1.83585	0.455273	4.03243	5.52e-05	0.00377897	ENSMUSG00000037942	Crp	CRP
ENSMUSG00000034714.9	1347.77	-0.431557	0.107111	-4.02905	5.6e-05	0.00381084	ENSMUSG00000034714	Ttyh2	TTYH2
ENSMUSG00000015850.11	187.945	1.08206	0.268583	4.02879	5.61e-05	0.00381084	ENSMUSG00000015850	Adamtsl4	ADAMTSL4
ENSMUSG00000057969.15	265.945	1.07597	0.267267	4.02581	5.68e-05	0.00384583	ENSMUSG00000057969	Sema3b	SEMA3B
ENSMUSG00000038077.7	164.089	1.10692	0.275102	4.02365	5.73e-05	0.00386764	ENSMUSG00000038077	Kcna6	KCNA6
ENSMUSG00000046844.6	2489.74	0.765707	0.190482	4.01983	5.82e-05	0.00391713	ENSMUSG00000046844	Vat1l	VAT1L
ENSMUSG00000000957.11	409.788	1.04896	0.261134	4.01695	5.9e-05	0.0039262	ENSMUSG00000000957	Mmp14	MMP14
ENSMUSG00000025324.8	84.2938	1.20785	0.300693	4.0169	5.9e-05	0.0039262	ENSMUSG00000025324	Atp10a	ATP10A
ENSMUSG00000035864.14	343.679	1.38109	0.343827	4.01683	5.9e-05	0.0039262	ENSMUSG00000035864	Syt1	SYT1
ENSMUSG00000026587.15	83.289	1.5264	0.380186	4.01488	5.95e-05	0.00394504	ENSMUSG00000026587	Astn1	ASTN1
ENSMUSG00000041801.5	232.798	0.896708	0.223424	4.01348	5.98e-05	0.00394504	ENSMUSG00000041801	Phlda3	PHLDA3
ENSMUSG00000025092.7	586.706	-0.748848	0.186593	-4.01326	5.99e-05	0.00394504	ENSMUSG00000025092	Hspa12a	HSPA12A
ENSMUSG00000037902.18	2926.07	-0.497687	0.124039	-4.01236	6.01e-05	0.00394668	ENSMUSG00000037902	Sirpa	SIRPA
ENSMUSG00000047786.12	80.0628	1.20268	0.299896	4.01033	6.06e-05	0.00396711	ENSMUSG00000047786	Lix1	LIX1
ENSMUSG00000026764.15	2180.98	0.941767	0.235246	4.00333	6.25e-05	0.00407255	ENSMUSG00000026764	Kif5c	KIF5C
ENSMUSG00000041324.14	104.764	1.3437	0.336173	3.99704	6.41e-05	0.0041682	ENSMUSG00000041324	Inhba	INHBA
ENSMUSG00000108348.2	67.9003	1.07222	0.268615	3.99167	6.56e-05	0.00424944	ENSMUSG00000108348	Gm42372	GM42372
ENSMUSG00000024998.17	216.818	1.08047	0.270861	3.98903	6.63e-05	0.00426816	ENSMUSG00000024998	Plce1	PLCE1
ENSMUSG00000051243.14	69.8261	1.80342	0.452071	3.98925	6.63e-05	0.00426816	ENSMUSG00000051243	Islr2	ISLR2
ENSMUSG00000068196.5	94.3759	1.27863	0.321038	3.98279	6.81e-05	0.00436728	ENSMUSG00000068196	Col8a1	COL8A1
ENSMUSG00000001260.10	27.0459	1.82484	0.458393	3.98095	6.86e-05	0.00438659	ENSMUSG00000001260	Gabrg1	GABRG1
ENSMUSG00000084939.2	168.84	2.28612	0.57446	3.97959	6.9e-05	0.00439709	ENSMUSG00000084939	Gm830	GM830
ENSMUSG00000035863.14	670.33	0.765259	0.192353	3.97841	6.94e-05	0.00440447	ENSMUSG00000035863	Palm	PALM
ENSMUSG00000024013.15	1094.91	-0.615799	0.154899	-3.97549	7.02e-05	0.00444427	ENSMUSG00000024013	Fgd2	FGD2
ENSMUSG00000059857.15	11.6735	2.34544	0.590221	3.97383	7.07e-05	0.00445935	ENSMUSG00000059857	Ntng1	NTNG1
ENSMUSG00000047230.6	314.383	1.28458	0.323318	3.97312	7.09e-05	0.00445935	ENSMUSG00000047230	Cldn2	CLDN2
ENSMUSG00000037813.13	119.33	1.33902	0.337141	3.97169	7.14e-05	0.00447155	ENSMUSG00000037813	D630003M21Rik	D630003M21RIK
ENSMUSG00000021795.10	92.3277	1.68893	0.425507	3.96921	7.21e-05	0.0045036	ENSMUSG00000021795	Sftpd	SFTPD
ENSMUSG00000000326.13	1535.81	-0.640189	0.161341	-3.96792	7.25e-05	0.00451339	ENSMUSG00000000326	Comt	COMT
ENSMUSG00000026494.12	32.8276	1.76083	0.443944	3.96635	7.3e-05	0.00451923	ENSMUSG00000026494	Kif26b	KIF26B
ENSMUSG00000047250.13	244.904	0.958885	0.241772	3.96608	7.31e-05	0.00451923	ENSMUSG00000047250	Ptgs1	PTGS1
ENSMUSG00000040148.5	7.87199	2.81515	0.71118	3.95843	7.54e-05	0.00465142	ENSMUSG00000040148	Hmx3	HMX3
ENSMUSG00000062209.15	28.331	1.97668	0.50164	3.94043	8.13e-05	0.00499856	ENSMUSG00000062209	Erbb4	ERBB4
ENSMUSG00000024074.8	297.91	1.00346	0.254938	3.93608	8.28e-05	0.00507376	ENSMUSG00000024074	Crim1	CRIM1
ENSMUSG00000087222.1	29.2854	-1.14345	0.29069	-3.93358	8.37e-05	0.00511066	ENSMUSG00000087222	E030042O20Rik	E030042O20RIK
ENSMUSG00000038775.14	135.548	0.940321	0.239321	3.92912	8.53e-05	0.00518985	ENSMUSG00000038775	Vill	VILL
ENSMUSG00000026643.16	1484.8	-0.460788	0.117321	-3.92757	8.58e-05	0.00520691	ENSMUSG00000026643	Nmt2	NMT2
ENSMUSG00000044365.15	1745.17	-0.695561	0.177358	-3.92179	8.79e-05	0.00531465	ENSMUSG00000044365	Cxxc4	CXXC4
ENSMUSG00000045009.9	119.657	-1.00533	0.256388	-3.92113	8.81e-05	0.00531465	ENSMUSG00000045009	Prrt3	PRRT3
ENSMUSG00000031342.17	217.516	0.963797	0.245907	3.91935	8.88e-05	0.00532874	ENSMUSG00000031342	Gpm6b	GPM6B
ENSMUSG00000043705.7	9.86521	3.60784	0.920605	3.91898	8.89e-05	0.00532874	ENSMUSG00000043705	Capn13	CAPN13
ENSMUSG00000038784.13	676.043	-0.398554	0.101758	-3.91667	8.98e-05	0.00534397	ENSMUSG00000038784	Cnot4	CNOT4
ENSMUSG00000026185.8	746.817	0.996645	0.254497	3.91614	9e-05	0.00534397	ENSMUSG00000026185	Igfbp5	IGFBP5
ENSMUSG00000042647.13	453.751	-0.474077	0.12106	-3.91605	9e-05	0.00534397	ENSMUSG00000042647	Acad12	ACAD12
ENSMUSG00000040724.5	208.495	0.88066	0.225034	3.91346	9.1e-05	0.00538507	ENSMUSG00000040724	Kcna2	KCNA2
ENSMUSG00000048240.14	110.659	0.943504	0.241332	3.90957	9.25e-05	0.00545577	ENSMUSG00000048240	Gng7	GNG7
ENSMUSG00000021536.7	61.5744	1.49264	0.381986	3.90759	9.32e-05	0.00548388	ENSMUSG00000021536	Adcy2	ADCY2
ENSMUSG00000030054.4	13.1871	2.32903	0.596212	3.90638	9.37e-05	0.00548782	ENSMUSG00000030054	Gp9	GP9
ENSMUSG00000032338.9	453.96	-0.8594	0.220024	-3.90594	9.39e-05	0.00548782	ENSMUSG00000032338	Hcn4	HCN4
ENSMUSG00000022098.10	2566.34	-0.769387	0.197058	-3.90437	9.45e-05	0.00550688	ENSMUSG00000022098	Bmp1	BMP1
ENSMUSG00000026544.6	487.973	-0.74764	0.191538	-3.90335	9.49e-05	0.0055133	ENSMUSG00000026544	Dusp23	DUSP23
ENSMUSG00000058626.16	8.44567	-5.03266	1.29038	-3.90012	9.61e-05	0.00557054	ENSMUSG00000058626	Capn11	CAPN11
ENSMUSG00000055471.7	69.5638	1.48996	0.383195	3.88826	0.000100966	0.00581173	ENSMUSG00000055471	Alk	ALK
ENSMUSG00000040254.11	17.3368	2.22551	0.572421	3.88789	0.000101118	0.00581173	ENSMUSG00000040254	Sema3d	SEMA3D
ENSMUSG00000027984.8	11633.7	-0.687938	0.176954	-3.88767	0.000101213	0.00581173	ENSMUSG00000027984	Hadh	HADH
ENSMUSG00000029757.16	209.926	1.03293	0.266034	3.88271	0.000103298	0.00591381	ENSMUSG00000029757	Dync1i1	DYNC1I1
ENSMUSG00000056515.9	467.244	0.61237	0.157792	3.88088	0.000104081	0.00592634	ENSMUSG00000056515	Rab31	RAB31
ENSMUSG00000041608.8	2771.24	-0.683243	0.176059	-3.88075	0.000104133	0.00592634	ENSMUSG00000041608	Entpd3	ENTPD3
ENSMUSG00000044217.17	105.891	1.86295	0.48037	3.87815	0.000105254	0.00597246	ENSMUSG00000044217	Aqp5	AQP5
ENSMUSG00000035954.10	125.593	0.93469	0.241254	3.8743	0.00010693	0.0060497	ENSMUSG00000035954	Dock4	DOCK4
ENSMUSG00000027603.15	686.256	-0.679707	0.175756	-3.86733	0.000110033	0.00620262	ENSMUSG00000027603	Ggt7	GGT7
ENSMUSG00000116652.2	2579.38	-0.773427	0.200018	-3.86679	0.000110277	0.00620262	ENSMUSG00000116652	B830017H08Rik	B830017H08RIK
ENSMUSG00000103707.5	5.55589	4.47482	1.15776	3.86506	0.000111062	0.00622853	ENSMUSG00000103707	Pcdha6	PCDHA6
ENSMUSG00000030340.16	100.197	1.46923	0.380341	3.86293	0.000112037	0.00626496	ENSMUSG00000030340	Scnn1a	SCNN1A
ENSMUSG00000073408.2	17.4285	-4.38758	1.13642	-3.86089	0.000112977	0.0062992	ENSMUSG00000073408	Mucl3	MUCL3
ENSMUSG00000018865.9	806.316	0.997583	0.258629	3.8572	0.000114694	0.00637648	ENSMUSG00000018865	Sult4a1	SULT4A1
ENSMUSG00000036853.5	92.8928	-1.07473	0.278695	-3.85629	0.000115122	0.0063818	ENSMUSG00000036853	Mcoln3	MCOLN3
ENSMUSG00000044312.4	267.349	1.24381	0.322708	3.85428	0.000116073	0.00640452	ENSMUSG00000044312	Neurog3	NEUROG3
ENSMUSG00000018995.12	318.131	-0.663017	0.172302	-3.848	0.000119084	0.00654089	ENSMUSG00000018995	Nars2	NARS2
ENSMUSG00000033717.6	3236.19	-0.509002	0.132296	-3.84745	0.000119352	0.00654089	ENSMUSG00000033717	Adra2a	ADRA2A
ENSMUSG00000021111.15	3216.9	-0.451629	0.117522	-3.84293	0.000121575	0.00660935	ENSMUSG00000021111	Papola	PAPOLA
ENSMUSG00000067006.12	15.3982	3.81779	0.993477	3.84286	0.00012161	0.00660935	ENSMUSG00000067006	Serpinb5	SERPINB5
ENSMUSG00000046694.6	61.7388	1.48722	0.387013	3.84281	0.000121632	0.00660935	ENSMUSG00000046694	Tent5b	TENT5B
ENSMUSG00000070695.4	34.1222	1.86161	0.484645	3.84117	0.000122448	0.00663498	ENSMUSG00000070695	Cntnap5a	CNTNAP5A
ENSMUSG00000036264.9	43.8462	1.08555	0.283038	3.83535	0.000125386	0.00677509	ENSMUSG00000036264	Fstl4	FSTL4
ENSMUSG00000029108.14	48.6857	1.8585	0.484859	3.83307	0.000126555	0.00681908	ENSMUSG00000029108	Pcdh7	PCDH7
ENSMUSG00000043366.16	94.8847	1.80824	0.471936	3.83155	0.00012734	0.00684219	ENSMUSG00000043366	Olfr78	OLFR78
ENSMUSG00000027016.17	34.484	1.56326	0.408428	3.8275	0.000129451	0.00691778	ENSMUSG00000027016	Zfp385b	ZFP385B
ENSMUSG00000034785.14	2165.93	-0.905908	0.236686	-3.82747	0.000129466	0.00691778	ENSMUSG00000034785	Dio1	DIO1
ENSMUSG00000041025.15	270.056	0.841986	0.220156	3.8245	0.000131037	0.00698234	ENSMUSG00000041025	Iffo2	IFFO2
ENSMUSG00000025017.10	921.132	0.967731	0.253223	3.82165	0.000132562	0.00703788	ENSMUSG00000025017	Pik3ap1	PIK3AP1
ENSMUSG00000116581.1	68.7754	-0.804694	0.210587	-3.82119	0.000132811	0.00703788	ENSMUSG00000116581	Gm46565	GM46565
ENSMUSG00000030093.7	37.9891	2.24084	0.587019	3.81731	0.000134914	0.00712971	ENSMUSG00000030093	Wnt7a	WNT7A
ENSMUSG00000034687.8	513.915	-0.757841	0.198786	-3.81234	0.000137659	0.0072548	ENSMUSG00000034687	Fras1	FRAS1
ENSMUSG00000035594.10	19.0026	2.14346	0.562848	3.80823	0.000139965	0.00735621	ENSMUSG00000035594	Chrna5	CHRNA5
ENSMUSG00000028780.13	366.739	1.01032	0.265347	3.80754	0.000140355	0.00735658	ENSMUSG00000028780	Sema3c	SEMA3C
ENSMUSG00000050777.7	133.896	1.24964	0.328295	3.80646	0.00014097	0.00736873	ENSMUSG00000050777	Tmem37	TMEM37
ENSMUSG00000020598.16	97.5531	1.59046	0.418084	3.80416	0.000142289	0.00741754	ENSMUSG00000020598	Nrcam	NRCAM
ENSMUSG00000022887.9	92.4881	1.08202	0.284999	3.79657	0.000146713	0.00762751	ENSMUSG00000022887	Masp1	MASP1
ENSMUSG00000078853.8	400.525	0.758361	0.199791	3.79578	0.000147179	0.00763109	ENSMUSG00000078853	Igtp	IGTP
ENSMUSG00000105867.2	22.2818	1.87885	0.495419	3.79245	0.00014917	0.00767688	ENSMUSG00000105867	Gm42517	GM42517
ENSMUSG00000031376.15	24.3428	2.40949	0.635474	3.79164	0.000149656	0.00767688	ENSMUSG00000031376	Atp2b3	ATP2B3
ENSMUSG00000021553.14	91.3387	1.38852	0.366331	3.79034	0.000150442	0.00767688	ENSMUSG00000021553	Slc28a3	SLC28A3
ENSMUSG00000051359.15	2549.88	0.661997	0.174663	3.79014	0.00015056	0.00767688	ENSMUSG00000051359	Ncald	NCALD
ENSMUSG00000114206.1	185.043	-1.43871	0.379604	-3.79004	0.000150621	0.00767688	ENSMUSG00000114206	Gm30551	GM30551
ENSMUSG00000000325.16	867.425	0.50046	0.13206	3.78966	0.000150856	0.00767688	ENSMUSG00000000325	Arvcf	ARVCF
ENSMUSG00000040867.13	79.8654	1.65696	0.437348	3.78866	0.000151463	0.00768744	ENSMUSG00000040867	Begain	BEGAIN
ENSMUSG00000074923.10	237.49	0.719325	0.190184	3.78226	0.00015541	0.00784011	ENSMUSG00000074923	Pak6	PAK6
ENSMUSG00000021919.8	19.4309	1.9769	0.522714	3.78199	0.00015558	0.00784011	ENSMUSG00000021919	Chat	CHAT
ENSMUSG00000053550.13	33.9979	1.68564	0.445724	3.78181	0.000155694	0.00784011	ENSMUSG00000053550	Shisa7	SHISA7
ENSMUSG00000040717.6	103.79	0.969269	0.256472	3.77924	0.000157308	0.00790072	ENSMUSG00000040717	Il17rd	IL17RD
ENSMUSG00000021509.5	30.9156	1.56729	0.415457	3.77246	0.000161647	0.00809749	ENSMUSG00000021509	Slc25a48	SLC25A48
ENSMUSG00000030510.11	10.2613	3.02318	0.802259	3.76833	0.000164341	0.00821106	ENSMUSG00000030510	Cers3	CERS3
ENSMUSG00000027166.14	459.515	-1.1524	0.306076	-3.76506	0.000166506	0.0082977	ENSMUSG00000027166	Dnajc24	DNAJC24
ENSMUSG00000031274.16	132.536	1.12828	0.299748	3.76409	0.000167159	0.0083087	ENSMUSG00000031274	Col4a5	COL4A5
ENSMUSG00000038375.15	7116.98	-0.483948	0.128595	-3.76335	0.000167655	0.00831189	ENSMUSG00000038375	Trp53inp2	TRP53INP2
ENSMUSG00000041062.7	80.5404	-1.26194	0.335391	-3.7626	0.000168159	0.00831542	ENSMUSG00000041062	Mslnl	MSLNL
ENSMUSG00000034813.18	294.55	-0.777678	0.207154	-3.7541	0.000173963	0.00858041	ENSMUSG00000034813	Grip1	GRIP1
ENSMUSG00000030872.14	2143.65	-0.500847	0.133611	-3.74854	0.00017787	0.00874195	ENSMUSG00000030872	Gga2	GGA2
ENSMUSG00000005373.13	6227.29	-0.865592	0.230939	-3.74814	0.000178147	0.00874195	ENSMUSG00000005373	Mlxipl	MLXIPL
ENSMUSG00000023942.15	3202.75	-0.411076	0.109734	-3.74611	0.000179597	0.00879064	ENSMUSG00000023942	Slc29a1	SLC29A1
ENSMUSG00000097184.2	270.394	-0.862417	0.230353	-3.7439	0.000181189	0.00883056	ENSMUSG00000097184	4632428C04Rik	4632428C04RIK
ENSMUSG00000074480.4	118.253	0.889449	0.237586	3.7437	0.00018133	0.00883056	ENSMUSG00000074480	Mex3a	MEX3A
ENSMUSG00000050271.12	166.706	0.980378	0.262033	3.74143	0.000182973	0.00888806	ENSMUSG00000050271	Prag1	PRAG1
ENSMUSG00000036098.15	985.634	0.989898	0.264762	3.73882	0.000184889	0.00895849	ENSMUSG00000036098	Myrf	MYRF
ENSMUSG00000039405.7	726.219	0.870143	0.232855	3.73684	0.000186347	0.00900648	ENSMUSG00000039405	Prss23	PRSS23
ENSMUSG00000015599.9	82.1966	1.16282	0.311731	3.73019	0.000191336	0.00922442	ENSMUSG00000015599	Ttbk1	TTBK1
ENSMUSG00000025964.15	198.783	1.00037	0.268511	3.72562	0.000194835	0.00936963	ENSMUSG00000025964	Adam23	ADAM23
ENSMUSG00000021453.2	2710.82	-0.882131	0.236924	-3.72326	0.000196664	0.00940272	ENSMUSG00000021453	Gadd45g	GADD45G
ENSMUSG00000032850.16	251.558	0.690377	0.185428	3.72316	0.000196747	0.00940272	ENSMUSG00000032850	Rnft2	RNFT2
ENSMUSG00000033419.16	492.962	0.642654	0.172624	3.72285	0.00019699	0.00940272	ENSMUSG00000033419	Snap91	SNAP91
ENSMUSG00000034336.3	1001.27	-0.380579	0.102257	-3.7218	0.00019781	0.00941849	ENSMUSG00000034336	Ina	INA
ENSMUSG00000022892.11	8851.09	0.493706	0.132698	3.72052	0.00019881	0.00943554	ENSMUSG00000022892	App	APP
ENSMUSG00000022636.13	2552.04	0.751045	0.201889	3.72009	0.000199149	0.00943554	ENSMUSG00000022636	Alcam	ALCAM
ENSMUSG00000020260.9	3397.86	-0.470733	0.126634	-3.71727	0.00020139	0.00951826	ENSMUSG00000020260	Pofut2	POFUT2
ENSMUSG00000036327.18	1891.32	-0.507356	0.136573	-3.7149	0.000203287	0.00958437	ENSMUSG00000036327	Qsox2	QSOX2
ENSMUSG00000024972.16	340.784	-1.06561	0.286928	-3.71386	0.000204121	0.0095973	ENSMUSG00000024972	Lgals12	LGALS12
ENSMUSG00000028782.14	52.9192	2.14616	0.577962	3.71332	0.000204559	0.0095973	ENSMUSG00000028782	Adgrb2	ADGRB2
ENSMUSG00000031028.14	103.019	1.67626	0.451569	3.71209	0.000205556	0.00961709	ENSMUSG00000031028	Tub	TUB
ENSMUSG00000020900.15	1089.56	0.679805	0.183159	3.71157	0.000205981	0.00961709	ENSMUSG00000020900	Myh10	MYH10
ENSMUSG00000031790.8	901.611	1.00123	0.270095	3.70695	0.000209769	0.00977026	ENSMUSG00000031790	Mmp15	MMP15
ENSMUSG00000019989.8	116.213	1.0105	0.27283	3.70376	0.000212427	0.00987018	ENSMUSG00000019989	Enpp3	ENPP3
ENSMUSG00000022211.9	1422.17	-0.557265	0.150613	-3.69998	0.000215615	0.00999415	ENSMUSG00000022211	Carmil3	CARMIL3
ENSMUSG00000004383.18	250.313	0.633847	0.171554	3.69473	0.000220121	0.0101785	ENSMUSG00000004383	Large1	LARGE1
ENSMUSG00000022026.7	960.223	-0.631444	0.170964	-3.69343	0.000221249	0.0102061	ENSMUSG00000022026	Olfm4	OLFM4
ENSMUSG00000031906.9	1136.96	0.702066	0.190128	3.69259	0.000221985	0.0102156	ENSMUSG00000031906	Smpd3	SMPD3
ENSMUSG00000028524.21	82.5733	1.37939	0.373763	3.69053	0.000223784	0.0102704	ENSMUSG00000028524	Sgip1	SGIP1
ENSMUSG00000030701.17	961.546	0.661335	0.179242	3.68962	0.000224585	0.0102704	ENSMUSG00000030701	Plekhb1	PLEKHB1
ENSMUSG00000039428.11	987.693	-0.421326	0.114199	-3.68941	0.000224778	0.0102704	ENSMUSG00000039428	Tmem135	TMEM135
ENSMUSG00000029838.11	161.693	1.15566	0.313426	3.68719	0.000226748	0.0103234	ENSMUSG00000029838	Ptn	PTN
ENSMUSG00000027004.3	6192.9	-0.62803	0.170341	-3.68689	0.000227011	0.0103234	ENSMUSG00000027004	Frzb	FRZB
ENSMUSG00000034871.2	9073.77	-0.949641	0.257617	-3.68626	0.000227576	0.0103247	ENSMUSG00000034871	Fam151a	FAM151A
ENSMUSG00000031548.7	90.7994	1.24007	0.33646	3.68564	0.00022813	0.0103255	ENSMUSG00000031548	Sfrp1	SFRP1
ENSMUSG00000022321.15	5.43062	4.18594	1.13707	3.68134	0.000232015	0.0104766	ENSMUSG00000022321	Cdh10	CDH10
ENSMUSG00000027803.14	266.246	0.855725	0.232618	3.67868	0.000234447	0.0105617	ENSMUSG00000027803	Wwtr1	WWTR1
ENSMUSG00000026380.10	213.538	1.15528	0.314106	3.67801	0.000235061	0.0105617	ENSMUSG00000026380	Tfcp2l1	TFCP2L1
ENSMUSG00000041936.18	1509.6	1.01914	0.277137	3.67739	0.000235631	0.0105617	ENSMUSG00000041936	Agrn	AGRN
ENSMUSG00000028186.14	164.334	-1.04843	0.285194	-3.67619	0.00023674	0.0105617	ENSMUSG00000028186	Uox	UOX
ENSMUSG00000046610.15	30.6493	-1.16137	0.315923	-3.67613	0.000236801	0.0105617	ENSMUSG00000046610	Oacyl	OACYL
ENSMUSG00000040354.14	1802.46	-0.699413	0.19028	-3.67571	0.000237193	0.0105617	ENSMUSG00000040354	Mars1	MARS1
ENSMUSG00000038456.9	255.769	0.719371	0.195851	3.67305	0.000239675	0.0106419	ENSMUSG00000038456	Dennd2a	DENND2A
ENSMUSG00000054161.12	80.4648	1.5373	0.418587	3.67259	0.000240101	0.0106419	ENSMUSG00000054161	Fam83e	FAM83E
ENSMUSG00000030711.16	317.222	1.33165	0.362873	3.66975	0.000242792	0.0107331	ENSMUSG00000030711	Sult1a1	SULT1A1
ENSMUSG00000040339.10	121.279	1.00642	0.274286	3.66924	0.000243275	0.0107331	ENSMUSG00000040339	Fam102b	FAM102B
ENSMUSG00000021062.15	163.386	0.940813	0.256999	3.66076	0.000251468	0.0110324	ENSMUSG00000021062	Rab15	RAB15
ENSMUSG00000041720.14	2559.06	-0.458832	0.125345	-3.66056	0.000251666	0.0110324	ENSMUSG00000041720	Pi4ka	PI4KA
ENSMUSG00000040612.13	241.246	1.68236	0.459607	3.66044	0.000251779	0.0110324	ENSMUSG00000040612	Ildr2	ILDR2
ENSMUSG00000027875.12	659.305	1.04295	0.285096	3.65824	0.000253953	0.0111024	ENSMUSG00000027875	Hmgcs2	HMGCS2
ENSMUSG00000078794.4	208.544	0.620324	0.169714	3.65511	0.000257071	0.0111711	ENSMUSG00000078794	Dact3	DACT3
ENSMUSG00000022261.6	972.954	0.614589	0.168149	3.65504	0.000257146	0.0111711	ENSMUSG00000022261	Sdc2	SDC2
ENSMUSG00000043013.10	48.8302	2.20837	0.604221	3.65491	0.000257267	0.0111711	ENSMUSG00000043013	Onecut1	ONECUT1
ENSMUSG00000037012.18	610.246	1.09383	0.299684	3.64994	0.000262303	0.0113285	ENSMUSG00000037012	Hk1	HK1
ENSMUSG00000017400.10	69.285	1.3609	0.372892	3.64959	0.000262659	0.0113285	ENSMUSG00000017400	Stac2	STAC2
ENSMUSG00000002221.11	2126.23	-0.497854	0.136525	-3.64661	0.000265727	0.0114352	ENSMUSG00000002221	Paxip1	PAXIP1
ENSMUSG00000032633.12	1496.38	-0.575832	0.158021	-3.64402	0.000268416	0.0115251	ENSMUSG00000032633	Flcn	FLCN
ENSMUSG00000020131.14	433.46	-0.795424	0.218634	-3.63815	0.000274603	0.0117418	ENSMUSG00000020131	Pcsk4	PCSK4
ENSMUSG00000024501.20	367.284	1.53688	0.422443	3.63807	0.000274684	0.0117418	ENSMUSG00000024501	Dpysl3	DPYSL3
ENSMUSG00000067455.5	82.6398	-0.809352	0.222688	-3.63446	0.000278562	0.0118812	ENSMUSG00000067455	H4c11	H4C11
ENSMUSG00000058056.16	262.026	1.0153	0.279443	3.6333	0.000279823	0.0119086	ENSMUSG00000058056	Palld	PALLD
ENSMUSG00000025993.10	1567.96	-1.22299	0.337102	-3.62795	0.000285681	0.012131	ENSMUSG00000025993	Slc40a1	SLC40A1
ENSMUSG00000040536.15	46.6307	1.59054	0.438541	3.6269	0.000286849	0.0121538	ENSMUSG00000040536	Necab1	NECAB1
ENSMUSG00000027356.8	212.972	1.35471	0.373967	3.62255	0.000291714	0.0123328	ENSMUSG00000027356	Fermt1	FERMT1
ENSMUSG00000013584.5	64.1693	1.44927	0.400356	3.61995	0.000294659	0.01243	ENSMUSG00000013584	Aldh1a2	ALDH1A2
ENSMUSG00000022490.7	3973.03	-0.705404	0.194977	-3.61789	0.000297015	0.0125019	ENSMUSG00000022490	Ppp1r1a	PPP1R1A
ENSMUSG00000045613.9	52.3819	1.58281	0.438203	3.61204	0.000303797	0.0127595	ENSMUSG00000045613	Chrm2	CHRM2
ENSMUSG00000084983.7	70.4647	-1.30027	0.360046	-3.61142	0.000304529	0.0127623	ENSMUSG00000084983	Gm11789	GM11789
ENSMUSG00000021613.9	418.254	1.01086	0.280174	3.60797	0.000308599	0.0129048	ENSMUSG00000021613	Hapln1	HAPLN1
ENSMUSG00000032500.10	50.0452	1.25662	0.348884	3.60182	0.000315991	0.0131853	ENSMUSG00000032500	Dclk3	DCLK3
ENSMUSG00000060882.5	25.8195	1.39378	0.387638	3.59557	0.000323687	0.0134771	ENSMUSG00000060882	Kcnd2	KCND2
ENSMUSG00000051379.12	150.596	1.61603	0.44956	3.59468	0.000324787	0.013485	ENSMUSG00000051379	Flrt3	FLRT3
ENSMUSG00000110218.1	30.9684	1.51872	0.422537	3.59429	0.000325278	0.013485	ENSMUSG00000110218	Gm20219	GM20219
ENSMUSG00000037966.15	2269.06	-0.513513	0.143094	-3.58864	0.000332408	0.0137296	ENSMUSG00000037966	Ninj1	NINJ1
ENSMUSG00000022382.15	126.192	2.03766	0.567834	3.58849	0.000332604	0.0137296	ENSMUSG00000022382	Wnt7b	WNT7B
ENSMUSG00000021287.12	248.842	-0.839231	0.234244	-3.58272	0.000340033	0.0139843	ENSMUSG00000021287	Xrcc3	XRCC3
ENSMUSG00000041390.18	180.788	0.808522	0.225682	3.58257	0.00034023	0.0139843	ENSMUSG00000041390	Mdfic	MDFIC
ENSMUSG00000074064.6	1297.09	-0.501528	0.140271	-3.57542	0.000349668	0.0143416	ENSMUSG00000074064	Mlycd	MLYCD
ENSMUSG00000032890.17	2496.64	-0.975409	0.27299	-3.57306	0.000352834	0.0144407	ENSMUSG00000032890	Rims3	RIMS3
ENSMUSG00000054342.8	404.178	1.10095	0.308193	3.57229	0.000353867	0.0144522	ENSMUSG00000054342	Kcnn4	KCNN4
ENSMUSG00000024150.12	2197.56	-0.839296	0.235064	-3.5705	0.000356297	0.0145035	ENSMUSG00000024150	Mcfd2	MCFD2
ENSMUSG00000022453.8	4405.58	-0.445991	0.124927	-3.57002	0.000356951	0.0145035	ENSMUSG00000022453	Naga	NAGA
ENSMUSG00000045294.11	2220.18	-0.355873	0.0996925	-3.5697	0.000357384	0.0145035	ENSMUSG00000045294	Insig1	INSIG1
ENSMUSG00000048022.11	163.676	1.10579	0.310133	3.56553	0.000363115	0.0146857	ENSMUSG00000048022	Tmem229a	TMEM229A
ENSMUSG00000028555.15	1487.86	-0.386818	0.108494	-3.56533	0.000363401	0.0146857	ENSMUSG00000028555	Ttc39a	TTC39A
ENSMUSG00000029212.11	14.0201	3.16623	0.888835	3.56222	0.000367726	0.0148293	ENSMUSG00000029212	Gabrb1	GABRB1
ENSMUSG00000078532.9	17.2221	1.75667	0.494322	3.55369	0.000379867	0.0152869	ENSMUSG00000078532	Nkain1	NKAIN1
ENSMUSG00000031538.6	149.271	1.02438	0.288357	3.55249	0.000381603	0.0153247	ENSMUSG00000031538	Plat	PLAT
ENSMUSG00000112014.1	38.0937	-1.29184	0.36378	-3.55117	0.000383528	0.0153699	ENSMUSG00000112014	Gm48435	GM48435
ENSMUSG00000038068.15	63.1928	0.989375	0.278739	3.54946	0.000386015	0.0154374	ENSMUSG00000038068	Rnf144b	RNF144B
ENSMUSG00000036492.12	47.4983	0.924103	0.260562	3.54657	0.000390282	0.0155756	ENSMUSG00000036492	Rnf39	RNF39
ENSMUSG00000028949.13	121.369	0.956571	0.26991	3.54403	0.000394057	0.0156938	ENSMUSG00000028949	Smarcd3	SMARCD3
ENSMUSG00000050144.13	1848.11	-0.455611	0.128608	-3.54264	0.000396137	0.015744	ENSMUSG00000050144	Slc25a44	SLC25A44
ENSMUSG00000026070.15	70.4408	1.35097	0.381566	3.5406	0.000399213	0.0158335	ENSMUSG00000026070	Il18r1	IL18R1
ENSMUSG00000053153.14	3.15463	4.26034	1.20359	3.53969	0.000400592	0.0158555	ENSMUSG00000053153	Spag16	SPAG16
ENSMUSG00000052125.16	75.5798	0.876536	0.247698	3.53873	0.000402062	0.015881	ENSMUSG00000052125	F730043M19Rik	F730043M19RIK
ENSMUSG00000038600.12	24.0633	1.59585	0.451094	3.53773	0.000403578	0.0159082	ENSMUSG00000038600	Atp6v0a4	ATP6V0A4
ENSMUSG00000060621.6	10.9195	1.82928	0.517504	3.53481	0.000408067	0.0160523	ENSMUSG00000060621	Nkpd1	NKPD1
ENSMUSG00000020159.8	164.727	2.116	0.600412	3.52425	0.000424691	0.0166721	ENSMUSG00000020159	Gabrp	GABRP
ENSMUSG00000003500.13	1977.75	-0.712773	0.202407	-3.52149	0.000429132	0.0168122	ENSMUSG00000003500	Impdh1	IMPDH1
ENSMUSG00000043621.13	996.478	-0.672346	0.191005	-3.52005	0.000431464	0.0168692	ENSMUSG00000043621	Ubxn10	UBXN10
ENSMUSG00000039914.6	835.98	-0.441732	0.125537	-3.51873	0.000433611	0.0169187	ENSMUSG00000039914	Coq10a	COQ10A
ENSMUSG00000052117.5	500.215	-0.6983	0.198595	-3.51621	0.000437762	0.0170363	ENSMUSG00000052117	D630039A03Rik	D630039A03RIK
ENSMUSG00000022472.16	3226.44	-0.428488	0.121874	-3.51582	0.000438394	0.0170363	ENSMUSG00000022472	Desi1	DESI1
ENSMUSG00000030030.5	104.177	0.746301	0.212351	3.51447	0.000440627	0.0170885	ENSMUSG00000030030	1700003E16Rik	1700003E16RIK
ENSMUSG00000050967.5	172.154	0.698817	0.199063	3.51053	0.000447214	0.0172743	ENSMUSG00000050967	Creg2	CREG2
ENSMUSG00000046982.11	2794	-0.507602	0.144617	-3.50998	0.000448135	0.0172752	ENSMUSG00000046982	Tshz1	TSHZ1
ENSMUSG00000027797.15	436.631	1.11111	0.316748	3.50787	0.000451708	0.0173592	ENSMUSG00000027797	Dclk1	DCLK1
ENSMUSG00000031024.13	1429.22	-0.512008	0.14597	-3.50763	0.000452119	0.0173592	ENSMUSG00000031024	Denn2b	DENN2B
ENSMUSG00000031442.21	2708.56	-0.462241	0.13185	-3.5058	0.000455234	0.017444	ENSMUSG00000031442	Mcf2l	MCF2L
ENSMUSG00000036782.13	270.369	0.917265	0.261797	3.50373	0.000458791	0.0175453	ENSMUSG00000036782	Klhl13	KLHL13
ENSMUSG00000002808.7	401.297	0.83414	0.238155	3.5025	0.00046091	0.0175914	ENSMUSG00000002808	Epdr1	EPDR1
ENSMUSG00000001870.16	213.819	0.890228	0.254592	3.49668	0.00047109	0.0179443	ENSMUSG00000001870	Ltbp1	LTBP1
ENSMUSG00000019256.17	215.99	0.68286	0.195484	3.49317	0.000477321	0.0181099	ENSMUSG00000019256	Ahr	AHR
ENSMUSG00000024513.16	2469.41	-0.400231	0.114713	-3.48896	0.000484895	0.0183611	ENSMUSG00000024513	Mbd2	MBD2
ENSMUSG00000053024.14	44.5021	1.96371	0.56295	3.48824	0.000486204	0.0183745	ENSMUSG00000053024	Cntn2	CNTN2
ENSMUSG00000115388.2	178.988	1.0219	0.293036	3.48728	0.000487959	0.0183935	ENSMUSG00000115388	Eppk1	EPPK1
ENSMUSG00000049313.8	1640.33	0.657603	0.188591	3.48692	0.000488619	0.0183935	ENSMUSG00000049313	Sorl1	SORL1
ENSMUSG00000022454.17	91.4803	1.62808	0.466993	3.4863	0.000489754	0.0184002	ENSMUSG00000022454	Nell2	NELL2
ENSMUSG00000032418.15	1048.41	0.829681	0.238149	3.48388	0.000494203	0.0185312	ENSMUSG00000032418	Me1	ME1
ENSMUSG00000014329.14	1601.67	0.86197	0.247472	3.4831	0.000495638	0.0185488	ENSMUSG00000014329	Bicc1	BICC1
ENSMUSG00000036242.15	57.5062	1.17485	0.337781	3.47813	0.00050492	0.0188595	ENSMUSG00000036242	Armh4	ARMH4
ENSMUSG00000115811.1	12.9735	1.80049	0.5178	3.47718	0.00050671	0.0188897	ENSMUSG00000115811	Gm41293	GM41293
ENSMUSG00000034981.9	802.794	0.821467	0.236554	3.47265	0.000515354	0.0191747	ENSMUSG00000034981	Parm1	PARM1
ENSMUSG00000031803.8	893.033	-0.542694	0.156351	-3.47101	0.00051851	0.0192549	ENSMUSG00000031803	B3gnt3	B3GNT3
ENSMUSG00000019066.13	4764.09	-0.489995	0.141291	-3.46798	0.000524379	0.0194181	ENSMUSG00000019066	Rab3d	RAB3D
ENSMUSG00000015484.3	101.024	0.852585	0.245864	3.4677	0.000524924	0.0194181	ENSMUSG00000015484	Fam163a	FAM163A
ENSMUSG00000031877.9	302.021	1.32132	0.381129	3.46686	0.000526581	0.0194421	ENSMUSG00000031877	Ces2g	CES2G
ENSMUSG00000082361.6	41.3922	1.13006	0.326031	3.46611	0.000528049	0.0194589	ENSMUSG00000082361	Btc	BTC
ENSMUSG00000041774.16	317.41	-0.53316	0.153915	-3.46399	0.000532227	0.0195688	ENSMUSG00000041774	Ydjc	YDJC
ENSMUSG00000032131.16	38.0535	1.26647	0.365654	3.46357	0.000533065	0.0195688	ENSMUSG00000032131	Abcg4	ABCG4
ENSMUSG00000054409.5	12.2	2.67602	0.772854	3.46252	0.000535143	0.0196076	ENSMUSG00000054409	Tmem74	TMEM74
ENSMUSG00000036672.5	127.484	0.723886	0.209445	3.45622	0.000547812	0.0200337	ENSMUSG00000036672	Cenpt	CENPT
ENSMUSG00000057715.13	71.5702	1.18908	0.344112	3.45551	0.000549258	0.0200484	ENSMUSG00000057715	A830018L16Rik	A830018L16RIK
ENSMUSG00000040694.4	38.6389	1.34899	0.390466	3.45481	0.000550675	0.0200621	ENSMUSG00000040694	Apobec2	APOBEC2
ENSMUSG00000071531.3	35.0226	1.10345	0.319506	3.45361	0.000553139	0.0201138	ENSMUSG00000071531	Gprin2	GPRIN2
ENSMUSG00000043541.16	26.6438	1.39619	0.404518	3.45148	0.000557516	0.0202347	ENSMUSG00000043541	Casc1	CASC1
ENSMUSG00000032782.19	478.298	-0.799675	0.231754	-3.45053	0.000559482	0.0202538	ENSMUSG00000032782	Cntrob	CNTROB
ENSMUSG00000042604.5	22.7826	2.23559	0.647958	3.45021	0.000560149	0.0202538	ENSMUSG00000042604	Kcna4	KCNA4
ENSMUSG00000023147.17	343.304	0.447975	0.129865	3.44955	0.00056152	0.0202653	ENSMUSG00000023147	Get1	GET1
ENSMUSG00000050556.9	1244.83	-0.607229	0.176159	-3.44705	0.000566738	0.0204033	ENSMUSG00000050556	Kcnb1	KCNB1
ENSMUSG00000113581.1	24.7611	1.63877	0.47546	3.44671	0.000567466	0.0204033	ENSMUSG00000113581	Dio3os	DIO3OS
ENSMUSG00000052951.5	233.037	0.757854	0.219943	3.44568	0.000569616	0.0204424	ENSMUSG00000052951	C130021I20Rik	C130021I20RIK
ENSMUSG00000025094.8	98.7447	1.5554	0.451788	3.44275	0.000575826	0.0206268	ENSMUSG00000025094	Slc18a2	SLC18A2
ENSMUSG00000032024.10	70.8815	0.958074	0.27833	3.44223	0.000576941	0.0206283	ENSMUSG00000032024	Clmp	CLMP
ENSMUSG00000035891.16	1535.98	-0.452247	0.131487	-3.43948	0.000582837	0.0208005	ENSMUSG00000035891	Cerk	CERK
ENSMUSG00000044628.5	322.099	0.639638	0.186313	3.43314	0.000596625	0.0212488	ENSMUSG00000044628	Rnf208	RNF208
ENSMUSG00000051403.9	5373.77	-0.491655	0.143227	-3.4327	0.000597609	0.0212488	ENSMUSG00000051403	Ppp1r37	PPP1R37
ENSMUSG00000020052.9	37.1881	1.38366	0.403178	3.43188	0.000599417	0.0212738	ENSMUSG00000020052	Ascl1	ASCL1
ENSMUSG00000024302.16	102.474	1.31302	0.383032	3.42797	0.000608111	0.0215346	ENSMUSG00000024302	Dtna	DTNA
ENSMUSG00000034209.4	10.0028	1.9076	0.556615	3.42714	0.000609967	0.0215346	ENSMUSG00000034209	Rasl10a	RASL10A
ENSMUSG00000057722.17	128.541	1.41535	0.412991	3.42707	0.000610126	0.0215346	ENSMUSG00000057722	Lepr	LEPR
ENSMUSG00000057074.6	5.93985	3.68571	1.07719	3.42158	0.000622574	0.0219109	ENSMUSG00000057074	Ces1g	CES1G
ENSMUSG00000030000.10	149.174	0.949427	0.277499	3.42137	0.000623065	0.0219109	ENSMUSG00000030000	Add2	ADD2
ENSMUSG00000056900.13	50.2825	1.25912	0.368218	3.41951	0.000627348	0.0220213	ENSMUSG00000056900	Usp13	USP13
ENSMUSG00000034161.8	73.1931	1.61435	0.4724	3.41733	0.000632391	0.02212	ENSMUSG00000034161	Scx	SCX
ENSMUSG00000111800.1	23.7046	-1.1215	0.328182	-3.4173	0.000632459	0.02212	ENSMUSG00000111800	Gm31557	GM31557
ENSMUSG00000036699.12	311.086	0.924643	0.270943	3.41269	0.000643258	0.0223867	ENSMUSG00000036699	Zcchc12	ZCCHC12
ENSMUSG00000059991.7	51.7458	1.12049	0.328333	3.41266	0.000643318	0.0223867	ENSMUSG00000059991	Nptx2	NPTX2
ENSMUSG00000096326.2	15.7903	-4.12248	1.20803	-3.41255	0.000643577	0.0223867	ENSMUSG00000096326	Ighv1-78	IGHV1-78
ENSMUSG00000051079.8	17.8244	1.73756	0.509367	3.41121	0.000646746	0.0224563	ENSMUSG00000051079	Rgs13	RGS13
ENSMUSG00000042035.11	133.098	0.960788	0.281741	3.41019	0.000649186	0.0224704	ENSMUSG00000042035	Igsf3	IGSF3
ENSMUSG00000038932.13	8.79075	2.88063	0.844744	3.41006	0.000649489	0.0224704	ENSMUSG00000038932	Tcfl5	TCFL5
ENSMUSG00000076549.2	16.8067	-2.84157	0.833745	-3.4082	0.000653933	0.0225836	ENSMUSG00000076549	Igkv4-68	IGKV4-68
ENSMUSG00000020937.14	143.556	1.42833	0.419329	3.40623	0.000658671	0.022657	ENSMUSG00000020937	Plcd3	PLCD3
ENSMUSG00000042203.8	1841.96	-0.488409	0.143393	-3.40609	0.00065901	0.022657	ENSMUSG00000042203	Tbc1d22b	TBC1D22B
ENSMUSG00000026249.10	366.472	0.746196	0.219093	3.40585	0.000659593	0.022657	ENSMUSG00000026249	Serpine2	SERPINE2
ENSMUSG00000028292.14	481.937	-0.608801	0.178796	-3.40501	0.00066161	0.0226851	ENSMUSG00000028292	Rars2	RARS2
ENSMUSG00000024486.6	873.683	0.898677	0.26399	3.40421	0.000663557	0.0226851	ENSMUSG00000024486	Hbegf	HBEGF
ENSMUSG00000018166.8	354.864	0.881961	0.259092	3.40405	0.000663949	0.0226851	ENSMUSG00000018166	Erbb3	ERBB3
ENSMUSG00000041992.9	360.333	1.05243	0.309273	3.40293	0.000666679	0.022738	ENSMUSG00000041992	Rapgef5	RAPGEF5
ENSMUSG00000041911.3	17.9864	1.71602	0.504795	3.39943	0.000675255	0.0229898	ENSMUSG00000041911	Dlx1	DLX1
ENSMUSG00000031137.17	85.9277	1.66225	0.48925	3.39754	0.000679935	0.0231082	ENSMUSG00000031137	Fgf13	FGF13
ENSMUSG00000035126.19	96.4319	0.963232	0.283587	3.3966	0.000682296	0.0231475	ENSMUSG00000035126	Wdr78	WDR78
ENSMUSG00000069540.4	29.0866	-1.08947	0.320895	-3.39511	0.000686008	0.02321	ENSMUSG00000069540	Gm4925	GM4925
ENSMUSG00000092470.1	53.2783	-1.31579	0.387579	-3.39489	0.00068655	0.02321	ENSMUSG00000092470	Gm20518	GM20518
ENSMUSG00000043668.13	1232.44	-0.545686	0.160872	-3.39205	0.000693708	0.0234108	ENSMUSG00000043668	Tox3	TOX3
ENSMUSG00000046204.14	74.8913	0.853524	0.251777	3.39	0.000698915	0.0235452	ENSMUSG00000046204	Pnma2	PNMA2
ENSMUSG00000025935.10	5351.57	-0.62679	0.184932	-3.3893	0.000700721	0.0235648	ENSMUSG00000025935	Tram1	TRAM1
ENSMUSG00000039239.14	222.142	1.08865	0.321468	3.3865	0.000707904	0.0237648	ENSMUSG00000039239	Tgfb2	TGFB2
ENSMUSG00000026749.11	154.976	0.750338	0.221712	3.38429	0.000713637	0.0238936	ENSMUSG00000026749	Nek6	NEK6
ENSMUSG00000117916.1	59.6275	-1.22423	0.361771	-3.384	0.000714389	0.0238936	ENSMUSG00000117916	9630028I04Rik	9630028I04RIK
ENSMUSG00000087150.7	31.4631	1.38758	0.410091	3.38358	0.000715466	0.0238936	ENSMUSG00000087150	BC064078	BC064078
ENSMUSG00000044229.9	96.8888	0.9093	0.26891	3.38143	0.000721108	0.0240313	ENSMUSG00000044229	Nxpe4	NXPE4
ENSMUSG00000019539.11	1013.21	0.702504	0.207777	3.38105	0.000722088	0.0240313	ENSMUSG00000019539	Rcn3	RCN3
ENSMUSG00000058420.8	156.529	0.947464	0.280317	3.37997	0.000724948	0.0240709	ENSMUSG00000058420	Syt17	SYT17
ENSMUSG00000052889.11	1398.17	-0.585841	0.173344	-3.37965	0.00072578	0.0240709	ENSMUSG00000052889	Prkcb	PRKCB
ENSMUSG00000001761.7	227.752	0.945643	0.280119	3.37586	0.000735841	0.0243625	ENSMUSG00000001761	Smo	SMO
ENSMUSG00000023073.2	4.61792	3.26796	0.968605	3.37388	0.000741156	0.0244963	ENSMUSG00000023073	Slc10a2	SLC10A2
ENSMUSG00000024727.9	9.47447	3.0542	0.905389	3.37336	0.000742565	0.0245008	ENSMUSG00000024727	Trpm6	TRPM6
ENSMUSG00000092286.1	163.578	-1.20044	0.35592	-3.37278	0.000744138	0.0245107	ENSMUSG00000092286	Dtnbos	DTNBOS
ENSMUSG00000024642.17	401.792	0.639106	0.189531	3.37204	0.000746144	0.0245348	ENSMUSG00000024642	Tle4	TLE4
ENSMUSG00000060678.5	63.8783	-0.818146	0.242792	-3.36974	0.000752393	0.0246607	ENSMUSG00000060678	H4c3	H4C3
ENSMUSG00000022055.7	262.207	1.73657	0.515361	3.36962	0.000752711	0.0246607	ENSMUSG00000022055	Nefl	NEFL
ENSMUSG00000056258.9	67.2333	1.85255	0.549847	3.36922	0.00075382	0.0246607	ENSMUSG00000056258	Kcnq3	KCNQ3
ENSMUSG00000041734.15	126.236	1.12269	0.333327	3.36813	0.000756789	0.0247158	ENSMUSG00000041734	Kirrel	KIRREL
ENSMUSG00000027375.14	181.77	1.39482	0.414486	3.36519	0.000764916	0.0249388	ENSMUSG00000027375	Mal	MAL
ENSMUSG00000020176.17	1482.04	0.597678	0.177673	3.36392	0.000768445	0.0250115	ENSMUSG00000020176	Grb10	GRB10
ENSMUSG00000074736.10	16.2813	2.02114	0.60094	3.36329	0.00077019	0.025026	ENSMUSG00000074736	Syndig1	SYNDIG1
ENSMUSG00000029814.10	11.9123	2.20305	0.655921	3.35871	0.000783081	0.025385	ENSMUSG00000029814	Igf2bp3	IGF2BP3
ENSMUSG00000020592.14	494.128	1.12961	0.336352	3.35842	0.00078388	0.025385	ENSMUSG00000020592	Sdc1	SDC1
ENSMUSG00000030956.15	366.614	0.712663	0.21238	3.35561	0.000791905	0.0255904	ENSMUSG00000030956	Fam53b	FAM53B
ENSMUSG00000036390.8	339.743	0.532131	0.158596	3.35527	0.000792882	0.0255904	ENSMUSG00000036390	Gadd45a	GADD45A
ENSMUSG00000018581.15	118.265	1.40242	0.418296	3.3527	0.00080027	0.0257856	ENSMUSG00000018581	Dnah11	DNAH11
ENSMUSG00000039838.11	40.6839	1.60162	0.478032	3.35046	0.000806787	0.0259435	ENSMUSG00000039838	Slc45a1	SLC45A1
ENSMUSG00000038152.4	127.462	-0.766121	0.228728	-3.34949	0.00080961	0.0259435	ENSMUSG00000038152	5033430I15Rik	5033430I15RIK
ENSMUSG00000024247.14	3377.74	-0.533464	0.159274	-3.34935	0.000810009	0.0259435	ENSMUSG00000024247	Pkdcc	PKDCC
ENSMUSG00000000901.17	49.3504	1.24499	0.371731	3.34916	0.000810567	0.0259435	ENSMUSG00000000901	Mmp11	MMP11
ENSMUSG00000024664.5	234.755	1.0318	0.308294	3.34681	0.000817468	0.0260795	ENSMUSG00000024664	Fads3	FADS3
ENSMUSG00000032402.12	313.726	0.753605	0.225203	3.34633	0.000818881	0.0260795	ENSMUSG00000032402	Smad3	SMAD3
ENSMUSG00000034463.4	574.329	1.46519	0.437851	3.34633	0.000818883	0.0260795	ENSMUSG00000034463	Scara3	SCARA3
ENSMUSG00000089669.7	34.5335	1.44364	0.431605	3.34482	0.000823367	0.026179	ENSMUSG00000089669	Tnfsf13	TNFSF13
ENSMUSG00000033805.12	151.98	1.03979	0.310963	3.34377	0.000826489	0.0262071	ENSMUSG00000033805	Ephx4	EPHX4
ENSMUSG00000024899.7	7203.5	-0.793871	0.23746	-3.34318	0.000828246	0.0262071	ENSMUSG00000024899	Papss2	PAPSS2
ENSMUSG00000031714.9	582.621	0.642265	0.192143	3.34265	0.000829827	0.0262071	ENSMUSG00000031714	Gab1	GAB1
ENSMUSG00000000126.11	44.8185	1.02718	0.307308	3.34251	0.000830242	0.0262071	ENSMUSG00000000126	Wnt9a	WNT9A
ENSMUSG00000019737.14	1030.55	-0.730234	0.218495	-3.34211	0.000831436	0.0262071	ENSMUSG00000019737	Syne4	SYNE4
ENSMUSG00000041540.16	114.91	1.32236	0.395711	3.34172	0.000832621	0.0262071	ENSMUSG00000041540	Sox5	SOX5
ENSMUSG00000067276.5	30.4589	1.56367	0.467979	3.34133	0.000833787	0.0262071	ENSMUSG00000067276	Capn6	CAPN6
ENSMUSG00000038963.15	122.867	0.873868	0.261664	3.33965	0.000838826	0.0263225	ENSMUSG00000038963	Slco4a1	SLCO4A1
ENSMUSG00000031543.18	55.5712	1.10044	0.329812	3.33656	0.000848231	0.0265742	ENSMUSG00000031543	Ank1	ANK1
ENSMUSG00000033377.14	230.697	1.0778	0.323363	3.33308	0.000858892	0.0268209	ENSMUSG00000033377	Palmd	PALMD
ENSMUSG00000000058.6	260.29	0.82528	0.247718	3.33153	0.000863705	0.0268295	ENSMUSG00000000058	Cav2	CAV2
ENSMUSG00000087694.8	768.205	-0.733984	0.220326	-3.33135	0.000864269	0.0268295	ENSMUSG00000087694	A530058N18Rik	A530058N18RIK
ENSMUSG00000048402.14	57.7422	1.81056	0.543513	3.33121	0.000864694	0.0268295	ENSMUSG00000048402	Gli2	GLI2
ENSMUSG00000003617.16	523.766	1.23025	0.369311	3.33119	0.000864747	0.0268295	ENSMUSG00000003617	Cp	CP
ENSMUSG00000029761.16	1465.03	0.737811	0.221553	3.33018	0.000867894	0.0268728	ENSMUSG00000029761	Cald1	CALD1
ENSMUSG00000053198.14	53.793	0.947101	0.284428	3.32985	0.000868939	0.0268728	ENSMUSG00000053198	Prx	PRX
ENSMUSG00000024665.8	914.52	0.692743	0.20807	3.32937	0.000870435	0.0268759	ENSMUSG00000024665	Fads2	FADS2
ENSMUSG00000027243.8	380.308	-0.480703	0.144547	-3.32559	0.000882307	0.0271988	ENSMUSG00000027243	Harbi1	HARBI1
ENSMUSG00000022231.10	255.901	0.948849	0.285454	3.324	0.000887351	0.0273105	ENSMUSG00000022231	Sema5a	SEMA5A
ENSMUSG00000048218.6	1684.98	-0.552646	0.166343	-3.32233	0.000892701	0.0274313	ENSMUSG00000048218	Amigo2	AMIGO2
ENSMUSG00000025817.12	698.432	-0.467693	0.140855	-3.32038	0.000898936	0.0275788	ENSMUSG00000025817	Nudt5	NUDT5
ENSMUSG00000028194.15	50.2614	1.35353	0.408042	3.31714	0.000909431	0.0278564	ENSMUSG00000028194	Ddah1	DDAH1
ENSMUSG00000026405.14	22.0914	2.07589	0.626776	3.31202	0.000926261	0.0283268	ENSMUSG00000026405	C4bp	C4BP
ENSMUSG00000023328.14	763.556	0.975632	0.294692	3.31068	0.000930684	0.0284169	ENSMUSG00000023328	Ache	ACHE
ENSMUSG00000022074.6	60.1342	0.902156	0.272737	3.30779	0.000940367	0.028667	ENSMUSG00000022074	Tnfrsf10b	TNFRSF10B
ENSMUSG00000046215.3	37.7331	1.71137	0.517572	3.30653	0.000944604	0.0287506	ENSMUSG00000046215	Rprml	RPRML
ENSMUSG00000050953.10	338.726	0.774204	0.234189	3.30589	0.000946748	0.0287704	ENSMUSG00000050953	Gja1	GJA1
ENSMUSG00000026457.14	2433.65	-0.372812	0.11281	-3.30479	0.000950465	0.0288378	ENSMUSG00000026457	Adipor1	ADIPOR1
ENSMUSG00000035187.10	12876.1	-0.585014	0.177049	-3.30426	0.000952286	0.0288475	ENSMUSG00000035187	Nkx6-1	NKX6-1
ENSMUSG00000032172.8	68.4895	1.12844	0.341626	3.30314	0.000956076	0.0289056	ENSMUSG00000032172	Olfm2	OLFM2
ENSMUSG00000035121.6	251.842	-0.564376	0.170885	-3.30266	0.00095773	0.0289056	ENSMUSG00000035121	Neil2	NEIL2
ENSMUSG00000049303.10	63.7667	1.07004	0.32402	3.30237	0.00095871	0.0289056	ENSMUSG00000049303	Syt12	SYT12
ENSMUSG00000095704.2	18.3199	3.09365	0.937028	3.30155	0.000961508	0.0289445	ENSMUSG00000095704	Gm8221	GM8221
ENSMUSG00000022505.9	545.572	0.772009	0.2339	3.3006	0.000964789	0.0289979	ENSMUSG00000022505	Emp2	EMP2
ENSMUSG00000061802.6	68.5496	-1.09223	0.331044	-3.29935	0.000969097	0.029073	ENSMUSG00000061802	Armc4	ARMC4
ENSMUSG00000007030.8	48.3121	1.15402	0.349809	3.29898	0.000970358	0.029073	ENSMUSG00000007030	Vwa7	VWA7
ENSMUSG00000027864.9	255.201	0.842258	0.255341	3.29856	0.000971821	0.029073	ENSMUSG00000027864	Ptgfrn	PTGFRN
ENSMUSG00000025889.13	134.522	1.02054	0.309452	3.29789	0.00097414	0.0290971	ENSMUSG00000025889	Snca	SNCA
ENSMUSG00000032220.10	567.677	0.751354	0.22788	3.29715	0.000976724	0.0291291	ENSMUSG00000032220	Myo1e	MYO1E
ENSMUSG00000045348.16	260.973	0.59774	0.181355	3.29596	0.000980868	0.0292074	ENSMUSG00000045348	Nyap1	NYAP1
ENSMUSG00000046070.9	1152.38	-0.778469	0.236232	-3.29535	0.000982976	0.0292249	ENSMUSG00000046070	Igfals	IGFALS
ENSMUSG00000031755.6	967.998	-0.486578	0.147716	-3.29402	0.000987646	0.0293185	ENSMUSG00000031755	Bbs2	BBS2
ENSMUSG00000018500.2	96.286	-1.3561	0.411753	-3.29348	0.000989562	0.0293301	ENSMUSG00000018500	Adora2b	ADORA2B
ENSMUSG00000026687.14	1984	-0.52249	0.158682	-3.29269	0.000992354	0.0293375	ENSMUSG00000026687	Aldh9a1	ALDH9A1
ENSMUSG00000020788.15	19058.1	-0.470253	0.142824	-3.29254	0.000992863	0.0293375	ENSMUSG00000020788	Atp2a3	ATP2A3
ENSMUSG00000030499.9	391.559	-0.624312	0.189647	-3.29196	0.00099492	0.0293532	ENSMUSG00000030499	Kctd15	KCTD15
ENSMUSG00000034730.17	36.9395	1.30159	0.395525	3.2908	0.000999036	0.0294295	ENSMUSG00000034730	Adgrb1	ADGRB1
ENSMUSG00000048142.9	60.9226	1.33333	0.405592	3.28738	0.00101125	0.0297438	ENSMUSG00000048142	Nat8l	NAT8L
ENSMUSG00000049521.2	732.385	0.844277	0.257406	3.27995	0.00103826	0.0304607	ENSMUSG00000049521	Cdc42ep1	CDC42EP1
ENSMUSG00000037820.15	1284.29	1.04693	0.319207	3.2798	0.00103879	0.0304607	ENSMUSG00000037820	Tgm2	TGM2
ENSMUSG00000015127.14	189.476	0.685443	0.209104	3.27799	0.00104547	0.0306099	ENSMUSG00000015127	Unkl	UNKL
ENSMUSG00000034177.15	122.835	1.04789	0.319824	3.27646	0.00105119	0.0307305	ENSMUSG00000034177	Rnf43	RNF43
ENSMUSG00000054708.17	1047.14	-0.392979	0.120054	-3.27334	0.00106285	0.0310244	ENSMUSG00000054708	Ankrd24	ANKRD24
ENSMUSG00000110266.1	9.36486	3.17847	0.972187	3.2694	0.00107775	0.0314115	ENSMUSG00000110266	Gm32742	GM32742
ENSMUSG00000021679.4	66.5313	-1.07458	0.329067	-3.26553	0.00109258	0.0317574	ENSMUSG00000021679	S100z	S100Z
ENSMUSG00000030222.13	88.3389	1.38558	0.424317	3.26545	0.00109292	0.0317574	ENSMUSG00000030222	Rerg	RERG
ENSMUSG00000004936.8	1495.13	0.349285	0.107037	3.26323	0.00110151	0.0319588	ENSMUSG00000004936	Map2k1	MAP2K1
ENSMUSG00000006445.3	201.95	0.915374	0.280595	3.26226	0.00110526	0.0320137	ENSMUSG00000006445	Epha2	EPHA2
ENSMUSG00000024883.8	54.1592	1.4636	0.448697	3.26189	0.00110673	0.0320137	ENSMUSG00000024883	Rin1	RIN1
ENSMUSG00000044647.16	21.0533	1.40119	0.429635	3.26135	0.00110882	0.0320259	ENSMUSG00000044647	Csrnp3	CSRNP3
ENSMUSG00000060548.13	124.928	1.56468	0.479916	3.26032	0.00111285	0.0320941	ENSMUSG00000060548	Tnfrsf19	TNFRSF19
ENSMUSG00000019876.15	520.351	0.792783	0.243284	3.25867	0.00111936	0.0322336	ENSMUSG00000019876	Pkib	PKIB
ENSMUSG00000075270.11	14.6818	1.65979	0.509859	3.25538	0.00113239	0.03256	ENSMUSG00000075270	Pde11a	PDE11A
ENSMUSG00000054252.18	703.473	1.45531	0.447258	3.25384	0.00113855	0.0326882	ENSMUSG00000054252	Fgfr3	FGFR3
ENSMUSG00000027762.6	26.8137	1.4651	0.450533	3.25193	0.00114623	0.0328597	ENSMUSG00000027762	Sucnr1	SUCNR1
ENSMUSG00000040711.8	102.855	1.43354	0.441112	3.24982	0.00115478	0.0330555	ENSMUSG00000040711	Sh3pxd2b	SH3PXD2B
ENSMUSG00000029829.4	7.28622	2.87834	0.886228	3.24786	0.00116278	0.0332351	ENSMUSG00000029829	Tmem213	TMEM213
ENSMUSG00000032268.13	50.0088	1.2545	0.386583	3.24511	0.00117405	0.0335075	ENSMUSG00000032268	Tmprss5	TMPRSS5
ENSMUSG00000039771.13	413.084	-0.522225	0.161007	-3.24348	0.00118078	0.0336497	ENSMUSG00000039771	Polr2j	POLR2J
ENSMUSG00000020953.17	25.8144	2.23227	0.688394	3.24272	0.00118395	0.0336899	ENSMUSG00000020953	Coch	COCH
ENSMUSG00000021038.17	908.117	-0.442585	0.136603	-3.23993	0.0011956	0.0339713	ENSMUSG00000021038	Vipas39	VIPAS39
ENSMUSG00000039556.16	456.065	0.834039	0.257751	3.23583	0.0012129	0.0343614	ENSMUSG00000039556	Ppp1r3f	PPP1R3F
ENSMUSG00000000876.11	378.37	-0.435089	0.134529	-3.23416	0.00122	0.0344847	ENSMUSG00000000876	Pxmp4	PXMP4
ENSMUSG00000078234.6	154.329	1.38029	0.42681	3.23397	0.00122084	0.0344847	ENSMUSG00000078234	Klhdc7a	KLHDC7A
ENSMUSG00000044288.6	232.274	1.04421	0.322937	3.23349	0.00122286	0.0344911	ENSMUSG00000044288	Cnr1	CNR1
ENSMUSG00000048078.16	443.007	0.677235	0.209516	3.23238	0.00122765	0.0345754	ENSMUSG00000048078	Tenm4	TENM4
ENSMUSG00000059149.17	110.012	1.00172	0.310076	3.23057	0.00123544	0.0347441	ENSMUSG00000059149	Mfsd4a	MFSD4A
ENSMUSG00000110462.1	4.68604	3.52738	1.09242	3.22896	0.00124243	0.0348895	ENSMUSG00000110462	Gm35572	GM35572
ENSMUSG00000020183.11	342.801	-0.900875	0.279036	-3.22852	0.0012443	0.0348913	ENSMUSG00000020183	Cpm	CPM
ENSMUSG00000030849.18	587.261	1.62603	0.503774	3.22769	0.00124792	0.0349419	ENSMUSG00000030849	Fgfr2	FGFR2
ENSMUSG00000056569.11	277.449	0.688625	0.213642	3.22326	0.0012674	0.0353402	ENSMUSG00000056569	Mpz	MPZ
ENSMUSG00000015970.19	232.738	1.21247	0.376175	3.22314	0.00126793	0.0353402	ENSMUSG00000015970	Chdh	CHDH
ENSMUSG00000037211.12	316.566	0.628236	0.194931	3.22287	0.00126912	0.0353402	ENSMUSG00000037211	Spry1	SPRY1
ENSMUSG00000029442.18	25.6314	1.58103	0.490579	3.22279	0.0012695	0.0353402	ENSMUSG00000029442	Wdr66	WDR66
ENSMUSG00000051817.8	575.993	-0.55636	0.172718	-3.2212	0.00127653	0.0354598	ENSMUSG00000051817	Sox12	SOX12
ENSMUSG00000092118.1	172.996	-0.659954	0.204892	-3.22099	0.00127748	0.0354598	ENSMUSG00000092118	Fancf	FANCF
ENSMUSG00000109305.1	200.345	-2.0461	0.635512	-3.21961	0.00128364	0.0355793	ENSMUSG00000109305	Smim38	SMIM38
ENSMUSG00000043760.16	552.45	0.916972	0.284958	3.21792	0.00129124	0.0357184	ENSMUSG00000043760	Pkhd1	PKHD1
ENSMUSG00000116287.1	73.3111	-1.16168	0.361033	-3.21767	0.00129237	0.0357184	ENSMUSG00000116287	Gm3924	GM3924
ENSMUSG00000038271.17	1439.6	-0.354974	0.110383	-3.21584	0.00130064	0.0358955	ENSMUSG00000038271	Iffo1	IFFO1
ENSMUSG00000027525.18	134.712	-0.772769	0.240342	-3.21528	0.00130316	0.0359134	ENSMUSG00000027525	Phactr3	PHACTR3
ENSMUSG00000111977.1	958.414	-0.519254	0.161551	-3.21417	0.0013082	0.0359743	ENSMUSG00000111977	Gm47163	GM47163
ENSMUSG00000032193.9	4134.61	-0.453372	0.141063	-3.21398	0.00130911	0.0359743	ENSMUSG00000032193	Ldlr	LDLR
ENSMUSG00000039629.14	100.313	1.10173	0.34285	3.21343	0.0013116	0.0359915	ENSMUSG00000039629	Strip2	STRIP2
ENSMUSG00000037972.7	434.901	0.69522	0.216401	3.21265	0.00131515	0.0360374	ENSMUSG00000037972	Snn	SNN
ENSMUSG00000031438.11	1269.86	-0.560485	0.174491	-3.21212	0.0013176	0.0360533	ENSMUSG00000031438	Rnf128	RNF128
ENSMUSG00000026344.9	16.2312	1.43612	0.447472	3.2094	0.00133014	0.0363444	ENSMUSG00000026344	Lypd1	LYPD1
ENSMUSG00000030116.14	29.0999	-2.00351	0.624621	-3.20756	0.00133866	0.0365254	ENSMUSG00000030116	Mfap5	MFAP5
ENSMUSG00000029475.17	1120.71	-0.510042	0.159084	-3.20611	0.00134543	0.0366583	ENSMUSG00000029475	Kdm2b	KDM2B
ENSMUSG00000022565.15	2205.1	0.776415	0.242238	3.20517	0.00134984	0.0367263	ENSMUSG00000022565	Plec	PLEC
ENSMUSG00000034825.14	76.3281	1.06157	0.331304	3.20421	0.00135431	0.0367625	ENSMUSG00000034825	Nrip3	NRIP3
ENSMUSG00000044933.3	4869.2	-0.94188	0.293964	-3.20407	0.00135499	0.0367625	ENSMUSG00000044933	Sstr3	SSTR3
ENSMUSG00000038503.15	1779.59	0.585357	0.182777	3.20257	0.00136209	0.0369029	ENSMUSG00000038503	Mesd	MESD
ENSMUSG00000034227.7	149.825	1.18286	0.369484	3.20138	0.0013677	0.0370029	ENSMUSG00000034227	Foxj1	FOXJ1
ENSMUSG00000059811.13	1154.97	-0.443091	0.138508	-3.19902	0.00137893	0.0372231	ENSMUSG00000059811	Atl2	ATL2
ENSMUSG00000016624.15	531.487	-0.889383	0.278059	-3.19854	0.00138126	0.0372231	ENSMUSG00000016624	Phf21b	PHF21B
ENSMUSG00000036564.17	1322.63	0.877349	0.274304	3.19846	0.00138164	0.0372231	ENSMUSG00000036564	Ndrg4	NDRG4
ENSMUSG00000022594.14	310.411	1.15059	0.360005	3.19603	0.00139333	0.0374855	ENSMUSG00000022594	Lynx1	LYNX1
ENSMUSG00000019146.2	36.1589	1.06685	0.333945	3.1947	0.00139976	0.0376058	ENSMUSG00000019146	Cacng2	CACNG2
ENSMUSG00000028680.14	466.753	-0.823151	0.257766	-3.19341	0.00140603	0.0377217	ENSMUSG00000028680	Plk3	PLK3
ENSMUSG00000112388.1	45.6943	-0.893241	0.279758	-3.19291	0.00140849	0.037735	ENSMUSG00000112388	AI463170	AI463170
ENSMUSG00000049866.12	518.202	0.733311	0.229852	3.19036	0.00142095	0.0380158	ENSMUSG00000049866	Arl4c	ARL4C
ENSMUSG00000029778.12	239.567	1.37204	0.430292	3.18863	0.00142948	0.038191	ENSMUSG00000029778	Adcyap1r1	ADCYAP1R1
ENSMUSG00000026452.15	253.383	-0.75816	0.237835	-3.18775	0.00143385	0.0382546	ENSMUSG00000026452	Syt2	SYT2
ENSMUSG00000028076.12	88.3494	0.901652	0.283145	3.18442	0.00145043	0.0386432	ENSMUSG00000028076	Cd1d1	CD1D1
ENSMUSG00000072663.12	11.6776	1.98011	0.622851	3.1791	0.00147733	0.0393057	ENSMUSG00000072663	Spef2	SPEF2
ENSMUSG00000110713.1	15.6387	-1.63423	0.514243	-3.17795	0.00148323	0.0394079	ENSMUSG00000110713	Gm30606	GM30606
ENSMUSG00000023243.9	155.909	1.16407	0.366986	3.17198	0.00151406	0.0401277	ENSMUSG00000023243	Kcnk5	KCNK5
ENSMUSG00000054598.13	76.3057	-1.0082	0.317856	-3.17189	0.00151449	0.0401277	ENSMUSG00000054598	9130230L23Rik	9130230L23RIK
ENSMUSG00000025404.15	2276.32	-0.637774	0.201193	-3.16996	0.00152459	0.0403398	ENSMUSG00000025404	R3hdm2	R3HDM2
ENSMUSG00000038208.13	526.511	-0.568157	0.179334	-3.16814	0.00153415	0.0405371	ENSMUSG00000038208	Pgap3	PGAP3
ENSMUSG00000038259.4	6.13189	2.70722	0.855063	3.16611	0.00154491	0.0407653	ENSMUSG00000038259	Gdf5	GDF5
ENSMUSG00000023999.14	6.71251	2.35475	0.743921	3.16532	0.00154914	0.040821	ENSMUSG00000023999	Kif6	KIF6
ENSMUSG00000041729.15	1216.47	-0.481927	0.15241	-3.16205	0.00156661	0.0411688	ENSMUSG00000041729	Coro2b	CORO2B
ENSMUSG00000044156.14	5668.81	-0.548875	0.173582	-3.16205	0.00156662	0.0411688	ENSMUSG00000044156	Hepacam2	HEPACAM2
ENSMUSG00000033453.8	82.461	0.955127	0.30225	3.16006	0.00157736	0.0413944	ENSMUSG00000033453	Adamts15	ADAMTS15
ENSMUSG00000021257.14	697.302	-0.505178	0.159984	-3.15769	0.00159027	0.0416764	ENSMUSG00000021257	Angel1	ANGEL1
ENSMUSG00000008575.17	847.848	0.790457	0.250363	3.15725	0.00159267	0.0416825	ENSMUSG00000008575	Nfib	NFIB
ENSMUSG00000027495.4	1775.66	-0.821108	0.260138	-3.15644	0.0015971	0.0417416	ENSMUSG00000027495	Fam210b	FAM210B
ENSMUSG00000021211.4	1089.92	-0.695968	0.220545	-3.15568	0.00160125	0.0417698	ENSMUSG00000021211	Akr1c12	AKR1C12
ENSMUSG00000051439.7	357.531	1.25331	0.39719	3.15545	0.00160252	0.0417698	ENSMUSG00000051439	Cd14	CD14
ENSMUSG00000031974.8	1270.99	-0.479287	0.151927	-3.15472	0.00160655	0.0417854	ENSMUSG00000031974	Abcb10	ABCB10
ENSMUSG00000030256.11	1656.02	-0.453131	0.143644	-3.15455	0.00160746	0.0417854	ENSMUSG00000030256	Bhlhe41	BHLHE41
ENSMUSG00000024593.15	13.0599	1.89329	0.600393	3.15342	0.00161368	0.0418903	ENSMUSG00000024593	Megf10	MEGF10
ENSMUSG00000035105.5	89.3946	1.06887	0.33968	3.14669	0.00165128	0.0428087	ENSMUSG00000035105	Egln3	EGLN3
ENSMUSG00000029752.12	3151.21	-0.681888	0.216784	-3.14547	0.00165823	0.0429153	ENSMUSG00000029752	Asns	ASNS
ENSMUSG00000066477.13	81.1193	1.62739	0.517424	3.14518	0.00165986	0.0429153	ENSMUSG00000066477	Gm16551	GM16551
ENSMUSG00000058248.12	235.543	0.682727	0.217516	3.13873	0.00169679	0.0438113	ENSMUSG00000058248	Kcnh1	KCNH1
ENSMUSG00000016763.15	72.6013	1.01223	0.322587	3.13783	0.00170201	0.0438306	ENSMUSG00000016763	Scube1	SCUBE1
ENSMUSG00000022822.16	1802.74	0.537055	0.171156	3.13782	0.00170209	0.0438306	ENSMUSG00000022822	Abcc5	ABCC5
ENSMUSG00000032092.5	86.4314	1.14268	0.36421	3.13742	0.00170444	0.0438323	ENSMUSG00000032092	Mpzl2	MPZL2
ENSMUSG00000062312.5	324.72	1.30102	0.414969	3.13522	0.00171725	0.0441029	ENSMUSG00000062312	Erbb2	ERBB2
ENSMUSG00000026432.7	178.825	0.861941	0.275013	3.13418	0.00172334	0.0441552	ENSMUSG00000026432	Avpr1b	AVPR1B
ENSMUSG00000025318.13	732.895	-0.440583	0.140578	-3.13409	0.00172388	0.0441552	ENSMUSG00000025318	Jph3	JPH3
ENSMUSG00000072769.6	12.9924	2.31936	0.740296	3.13302	0.00173019	0.0442579	ENSMUSG00000072769	Gm10419	GM10419
ENSMUSG00000076441.9	1533.9	1.02656	0.327791	3.13174	0.00173775	0.0443923	ENSMUSG00000076441	Ass1	ASS1
ENSMUSG00000018102.5	1793.41	-0.903725	0.288749	-3.12979	0.00174929	0.0446278	ENSMUSG00000018102	H2bc4	H2BC4
ENSMUSG00000033068.16	379.769	0.398709	0.127462	3.12807	0.00175956	0.0448302	ENSMUSG00000033068	Entpd6	ENTPD6
ENSMUSG00000035776.14	1173.76	0.487719	0.155944	3.12753	0.00176279	0.0448394	ENSMUSG00000035776	Cd99l2	CD99L2
ENSMUSG00000020122.16	243.677	-0.674692	0.215747	-3.12724	0.00176458	0.0448394	ENSMUSG00000020122	Egfr	EGFR
ENSMUSG00000024043.13	81.6653	1.21306	0.388166	3.12511	0.00177737	0.0451048	ENSMUSG00000024043	Arhgap28	ARHGAP28
ENSMUSG00000032114.9	2191.32	-0.474515	0.151929	-3.12326	0.00178857	0.0453282	ENSMUSG00000032114	Slc37a4	SLC37A4
ENSMUSG00000025592.17	65.3355	0.801136	0.256537	3.12288	0.00179088	0.0453282	ENSMUSG00000025592	Dach2	DACH2
ENSMUSG00000019647.16	137.744	0.764951	0.245032	3.12184	0.00179725	0.0453706	ENSMUSG00000019647	Sema6a	SEMA6A
ENSMUSG00000027878.11	509.511	1.01366	0.324698	3.12184	0.00179727	0.0453706	ENSMUSG00000027878	Notch2	NOTCH2
ENSMUSG00000069874.7	323.807	0.638184	0.204471	3.12115	0.00180147	0.0454168	ENSMUSG00000069874	Irgm2	IRGM2
ENSMUSG00000027895.10	79.0771	1.16816	0.374419	3.11994	0.00180891	0.0455203	ENSMUSG00000027895	Kcnc4	KCNC4
ENSMUSG00000047281.3	553.859	1.24564	0.39928	3.11971	0.0018103	0.0455203	ENSMUSG00000047281	Sfn	SFN
ENSMUSG00000074825.4	80.5958	0.86864	0.278549	3.11844	0.0018181	0.0456563	ENSMUSG00000074825	Itpripl1	ITPRIPL1
ENSMUSG00000028273.15	752.692	0.70531	0.226242	3.1175	0.00182391	0.0456563	ENSMUSG00000028273	Pdlim5	PDLIM5
ENSMUSG00000021303.14	3959.38	-0.567078	0.181909	-3.11737	0.00182473	0.0456563	ENSMUSG00000021303	Gng4	GNG4
ENSMUSG00000033863.2	3721.04	-0.875465	0.280841	-3.11729	0.00182521	0.0456563	ENSMUSG00000033863	Klf9	KLF9
ENSMUSG00000063063.12	238.704	0.628858	0.201793	3.11636	0.00183098	0.0457413	ENSMUSG00000063063	Ctnna2	CTNNA2
ENSMUSG00000045667.14	70.5354	1.02753	0.329805	3.11557	0.00183592	0.0458051	ENSMUSG00000045667	Smtnl2	SMTNL2
ENSMUSG00000074272.10	268.954	-0.866997	0.278351	-3.11476	0.00184092	0.0458266	ENSMUSG00000074272	Ceacam1	CEACAM1
ENSMUSG00000107886.1	8.4606	-2.42074	0.777206	-3.11466	0.00184154	0.0458266	ENSMUSG00000107886	Gm43880	GM43880
ENSMUSG00000037185.9	170.48	-0.71785	0.230557	-3.11355	0.00184854	0.0459411	ENSMUSG00000037185	Krt80	KRT80
ENSMUSG00000064247.14	21.1045	1.33194	0.428404	3.10909	0.00187667	0.04658	ENSMUSG00000064247	Plcxd1	PLCXD1
ENSMUSG00000024442.6	1325.46	-0.422555	0.135994	-3.10715	0.00188898	0.0468253	ENSMUSG00000024442	Dele1	DELE1
ENSMUSG00000060371.12	8.18804	2.55563	0.822851	3.10583	0.00189748	0.0469753	ENSMUSG00000060371	Caln1	CALN1
ENSMUSG00000031970.16	18.9622	1.61396	0.519859	3.10461	0.00190532	0.047109	ENSMUSG00000031970	Dbndd1	DBNDD1
ENSMUSG00000027463.14	111.356	1.10028	0.354819	3.10095	0.00192899	0.0476328	ENSMUSG00000027463	Slc52a3	SLC52A3
ENSMUSG00000114924.1	3.45647	-3.31457	1.06924	-3.09993	0.00193569	0.0477372	ENSMUSG00000114924	Gm38408	GM38408
ENSMUSG00000085421.1	5.57536	2.67939	0.865351	3.09631	0.00195948	0.0482619	ENSMUSG00000085421	4732490B19Rik	4732490B19RIK
ENSMUSG00000015363.13	4845.66	-0.548356	0.177406	-3.09096	0.00199512	0.0490769	ENSMUSG00000015363	Trabd	TRABD
ENSMUSG00000032006.15	196.682	0.96378	0.311909	3.08994	0.00200198	0.0491829	ENSMUSG00000032006	Pdgfd	PDGFD
ENSMUSG00000015647.9	909.52	1.1893	0.385075	3.08849	0.00201175	0.0493596	ENSMUSG00000015647	Lama5	LAMA5
ENSMUSG00000028033.16	51.2311	1.14809	0.371836	3.08762	0.00201769	0.0494222	ENSMUSG00000028033	Kcnq5	KCNQ5
ENSMUSG00000046093.9	113.097	1.53623	0.497587	3.08736	0.00201943	0.0494222	ENSMUSG00000046093	Hpcal4	HPCAL4
ENSMUSG00000090799.2	65.8277	0.930815	0.301577	3.08649	0.00202535	0.0495039	ENSMUSG00000090799	Klhl33	KLHL33
ENSMUSG00000040329.14	16.2928	1.7566	0.569218	3.08599	0.00202874	0.049524	ENSMUSG00000040329	Il7	IL7
ENSMUSG00000047793.13	193.805	1.1542	0.374742	3.07999	0.00207004	0.0504681	ENSMUSG00000047793	Sned1	SNED1
ENSMUSG00000045053.2	35.6843	-1.27024	0.412629	-3.0784	0.00208115	0.0506748	ENSMUSG00000045053	Kcng3	KCNG3
ENSMUSG00000036560.14	249.237	0.808039	0.26262	3.07683	0.00209212	0.0508774	ENSMUSG00000036560	Lgi4	LGI4
ENSMUSG00000040010.10	2445.13	-0.571255	0.185955	-3.072	0.00212627	0.0515759	ENSMUSG00000040010	Slc7a5	SLC7A5
ENSMUSG00000020182.16	9536.97	-0.998576	0.325082	-3.07177	0.00212794	0.0515759	ENSMUSG00000020182	Ddc	DDC
ENSMUSG00000028876.7	5.43654	2.72368	0.886751	3.07153	0.00212967	0.0515759	ENSMUSG00000028876	Epha10	EPHA10
ENSMUSG00000047842.7	52.5029	-1.18323	0.385315	-3.0708	0.00213485	0.0515759	ENSMUSG00000047842	Diras2	DIRAS2
ENSMUSG00000024511.15	216.996	1.04992	0.341908	3.07078	0.00213504	0.0515759	ENSMUSG00000024511	Rab27b	RAB27B
ENSMUSG00000046152.16	225.808	-0.515435	0.167866	-3.07051	0.00213693	0.0515759	ENSMUSG00000046152	Fut10	FUT10
ENSMUSG00000041688.16	113.297	1.11226	0.362357	3.06952	0.00214405	0.051683	ENSMUSG00000041688	Amot	AMOT
ENSMUSG00000024180.14	1380.86	-0.426707	0.139133	-3.06691	0.00216288	0.0520299	ENSMUSG00000024180	Tmem8	TMEM8
ENSMUSG00000098053.1	258.436	-0.74255	0.242156	-3.06641	0.00216645	0.0520299	ENSMUSG00000098053	Gm27033	GM27033
ENSMUSG00000020553.8	361.947	-0.507019	0.165353	-3.06627	0.00216744	0.0520299	ENSMUSG00000020553	Pctp	PCTP
ENSMUSG00000022178.11	228.153	1.01218	0.330128	3.06602	0.00216926	0.0520299	ENSMUSG00000022178	Ajuba	AJUBA
ENSMUSG00000015027.11	1049.83	-0.440228	0.143649	-3.06461	0.00217951	0.0522106	ENSMUSG00000015027	Galns	GALNS
ENSMUSG00000000567.5	326.821	1.0449	0.341033	3.06392	0.00218459	0.0522671	ENSMUSG00000000567	Sox9	SOX9
ENSMUSG00000117263.1	3.81552	3.79103	1.23834	3.06138	0.00220316	0.0526054	ENSMUSG00000117263	Gm35290	GM35290
ENSMUSG00000021098.14	3.20872	4.31636	1.41	3.06124	0.0022042	0.0526054	ENSMUSG00000021098	4930447C04Rik	4930447C04RIK
ENSMUSG00000037053.6	11.5891	-2.8482	0.930736	-3.06016	0.00221222	0.0527314	ENSMUSG00000037053	Azgp1	AZGP1
ENSMUSG00000095601.8	14.5509	-1.3581	0.44403	-3.05858	0.00222388	0.0529226	ENSMUSG00000095601	Rhox3a2	RHOX3A2
ENSMUSG00000031558.15	121.204	1.05027	0.343422	3.05824	0.00222639	0.0529226	ENSMUSG00000031558	Slit2	SLIT2
ENSMUSG00000028327.14	36.698	1.55549	0.508805	3.05715	0.0022345	0.0529226	ENSMUSG00000028327	Stra6l	STRA6L
ENSMUSG00000056870.9	40.1773	1.46015	0.477639	3.05701	0.00223554	0.0529226	ENSMUSG00000056870	Gulp1	GULP1
ENSMUSG00000026824.11	81.7401	0.748425	0.24483	3.05692	0.00223625	0.0529226	ENSMUSG00000026824	Kcnj3	KCNJ3
ENSMUSG00000093662.2	4.71131	5.40765	1.76903	3.05685	0.00223675	0.0529226	ENSMUSG00000093662	Gm20649	GM20649
ENSMUSG00000054934.10	45.9511	0.9599	0.314144	3.05561	0.00224606	0.0530776	ENSMUSG00000054934	Kcnmb4	KCNMB4
ENSMUSG00000059824.12	4312.56	-0.660568	0.216226	-3.05498	0.00225073	0.0531227	ENSMUSG00000059824	Dbp	DBP
ENSMUSG00000040659.3	1481.71	0.475216	0.155637	3.05337	0.00226287	0.0532983	ENSMUSG00000040659	Efhd2	EFHD2
ENSMUSG00000031584.16	1114.55	-0.348423	0.114118	-3.0532	0.00226418	0.0532983	ENSMUSG00000031584	Gsr	GSR
ENSMUSG00000058656.13	129.687	0.955525	0.31299	3.05289	0.00226648	0.0532983	ENSMUSG00000058656	Samd12	SAMD12
ENSMUSG00000007783.10	413.914	0.469481	0.153802	3.05249	0.00226949	0.053304	ENSMUSG00000007783	Cpt1c	CPT1C
ENSMUSG00000115970.1	6.25218	-3.01315	0.987482	-3.05135	0.00227819	0.0534189	ENSMUSG00000115970	8430426J06Rik	8430426J06RIK
ENSMUSG00000032860.5	63.0271	1.27625	0.418289	3.05111	0.00227994	0.0534189	ENSMUSG00000032860	P2ry2	P2RY2
ENSMUSG00000021943.7	106.749	1.14187	0.374357	3.05021	0.0022868	0.0535144	ENSMUSG00000021943	Gdf10	GDF10
ENSMUSG00000068617.5	1723.88	-0.646027	0.211912	-3.04857	0.00229934	0.0537425	ENSMUSG00000068617	Efcab1	EFCAB1
ENSMUSG00000084902.2	135.51	-1.29206	0.423902	-3.04802	0.00230357	0.0537759	ENSMUSG00000084902	Gm281	GM281
ENSMUSG00000028152.10	2308.22	-0.513839	0.168673	-3.04637	0.00231625	0.0540066	ENSMUSG00000028152	Tspan5	TSPAN5
ENSMUSG00000036928.14	8.20803	2.2255	0.730867	3.04501	0.00232672	0.054185	ENSMUSG00000036928	Stag3	STAG3
ENSMUSG00000025064.15	4.43707	4.07631	1.33899	3.04433	0.00233201	0.0542426	ENSMUSG00000025064	Col17a1	COL17A1
ENSMUSG00000028955.3	1568.91	-0.364326	0.119689	-3.04394	0.00233499	0.0542463	ENSMUSG00000028955	Vamp3	VAMP3
ENSMUSG00000056856.13	9.53669	2.62284	0.861814	3.04339	0.00233927	0.05428	ENSMUSG00000056856	Jakmip3	JAKMIP3
ENSMUSG00000024421.16	234.659	0.920377	0.302513	3.04244	0.00234672	0.0543874	ENSMUSG00000024421	Lama3	LAMA3
ENSMUSG00000024524.17	55.5068	1.03229	0.339358	3.04188	0.00235107	0.0543916	ENSMUSG00000024524	Gnal	GNAL
ENSMUSG00000056596.8	126.033	1.09778	0.36091	3.04169	0.00235256	0.0543916	ENSMUSG00000056596	Trnp1	TRNP1
ENSMUSG00000030089.15	462.447	1.05339	0.346496	3.04012	0.00236484	0.05461	ENSMUSG00000030089	Slc41a3	SLC41A3
ENSMUSG00000085049.1	14.5743	1.56142	0.513943	3.03812	0.00238062	0.0549084	ENSMUSG00000085049	Parvaos	PARVAOS
ENSMUSG00000032502.8	55.4254	1.43378	0.472133	3.03682	0.00239091	0.0550798	ENSMUSG00000032502	Stac	STAC
ENSMUSG00000041577.5	175.686	1.21017	0.398586	3.03615	0.00239623	0.0550806	ENSMUSG00000041577	Prelp	PRELP
ENSMUSG00000023224.12	2442.35	0.617403	0.203355	3.03609	0.00239668	0.0550806	ENSMUSG00000023224	Serping1	SERPING1
ENSMUSG00000069184.4	45.1765	1.26742	0.417614	3.0349	0.00240616	0.0552325	ENSMUSG00000069184	Zfp72	ZFP72
ENSMUSG00000038530.11	1307.9	0.654258	0.215668	3.03363	0.00241628	0.0553988	ENSMUSG00000038530	Rgs4	RGS4
ENSMUSG00000003849.8	83.3202	-0.810776	0.267453	-3.03147	0.00243369	0.0557314	ENSMUSG00000003849	Nqo1	NQO1
ENSMUSG00000049327.17	1200.29	0.406597	0.134174	3.03036	0.0024426	0.0558689	ENSMUSG00000049327	Kmt5a	KMT5A
ENSMUSG00000042115.4	105.885	-0.575964	0.190118	-3.02951	0.0024495	0.0559603	ENSMUSG00000042115	Klhdc8a	KLHDC8A
ENSMUSG00000092500.1	88.6118	-0.831093	0.274508	-3.02757	0.00246526	0.0562536	ENSMUSG00000092500	Gm20400	GM20400
ENSMUSG00000060002.14	571.083	-0.680846	0.225015	-3.02578	0.00247992	0.0565209	ENSMUSG00000060002	Chpt1	CHPT1
ENSMUSG00000092130.2	15.1159	-1.48252	0.490886	-3.02008	0.00252708	0.0573909	ENSMUSG00000092130	D030025P21Rik	D030025P21RIK
ENSMUSG00000020734.13	570.685	-0.518978	0.171851	-3.01993	0.00252836	0.0573909	ENSMUSG00000020734	Grin2c	GRIN2C
ENSMUSG00000005514.14	5888.9	-0.492918	0.163231	-3.01976	0.00252979	0.0573909	ENSMUSG00000005514	Por	POR
ENSMUSG00000056978.8	242.571	-1.693	0.560647	-3.01973	0.00253002	0.0573909	ENSMUSG00000056978	Hamp2	HAMP2
ENSMUSG00000045761.16	206.791	-0.821923	0.272476	-3.0165	0.00255715	0.0579379	ENSMUSG00000045761	Togaram2	TOGARAM2
ENSMUSG00000020435.17	124.081	0.679719	0.225408	3.01551	0.00256549	0.0580586	ENSMUSG00000020435	Osbp2	OSBP2
ENSMUSG00000030257.16	211.563	0.717659	0.238152	3.01344	0.00258301	0.0583863	ENSMUSG00000030257	Srgap3	SRGAP3
ENSMUSG00000020000.7	42.7138	1.0697	0.355054	3.01279	0.00258861	0.0584442	ENSMUSG00000020000	Moxd1	MOXD1
ENSMUSG00000018340.13	4495.01	0.346737	0.115111	3.01219	0.00259367	0.0584476	ENSMUSG00000018340	Anxa6	ANXA6
ENSMUSG00000031382.14	158.131	-1.31173	0.435494	-3.01206	0.00259484	0.0584476	ENSMUSG00000031382	Asb11	ASB11
ENSMUSG00000051675.13	592.681	0.35945	0.119352	3.01168	0.00259802	0.0584509	ENSMUSG00000051675	Trim32	TRIM32
ENSMUSG00000027993.16	535.256	0.35312	0.117354	3.00903	0.00262087	0.0588937	ENSMUSG00000027993	Trim2	TRIM2
ENSMUSG00000000934.9	73.681	0.702786	0.233586	3.00868	0.00262382	0.0588937	ENSMUSG00000000934	Top1mt	TOP1MT
ENSMUSG00000029503.16	51.3924	1.27851	0.425145	3.00723	0.00263642	0.0591075	ENSMUSG00000029503	P2rx2	P2RX2
ENSMUSG00000023348.11	261.133	0.785126	0.261235	3.00544	0.00265195	0.0593863	ENSMUSG00000023348	Trip6	TRIP6
ENSMUSG00000048612.16	418.625	1.02297	0.340572	3.00368	0.00266737	0.0596623	ENSMUSG00000048612	Myof	MYOF
ENSMUSG00000010342.16	6.14966	3.05031	1.01588	3.00264	0.00267651	0.0597971	ENSMUSG00000010342	Tex14	TEX14
ENSMUSG00000020027.18	1341.15	-0.863636	0.287698	-3.00188	0.00268319	0.0598768	ENSMUSG00000020027	Socs2	SOCS2
ENSMUSG00000036985.12	204.712	0.613565	0.204419	3.00151	0.00268641	0.0598792	ENSMUSG00000036985	Zdhhc9	ZDHHC9
ENSMUSG00000034990.15	363.36	-0.801165	0.267292	-2.99734	0.00272344	0.060544	ENSMUSG00000034990	Otoa	OTOA
ENSMUSG00000111333.1	22.3562	-1.13561	0.378927	-2.99691	0.00272732	0.060544	ENSMUSG00000111333	Gm48670	GM48670
ENSMUSG00000016349.10	1433.06	0.853051	0.284645	2.9969	0.00272744	0.060544	ENSMUSG00000016349	Eef1a2	EEF1A2
ENSMUSG00000036432.8	1344.98	-0.516583	0.172418	-2.99611	0.00273447	0.0605995	ENSMUSG00000036432	Siah2	SIAH2
ENSMUSG00000033207.7	19.8207	1.91571	0.639563	2.99534	0.00274135	0.0606819	ENSMUSG00000033207	Mamdc2	MAMDC2
ENSMUSG00000027225.7	40.5095	2.45853	0.821208	2.99379	0.00275533	0.0608727	ENSMUSG00000027225	Duoxa2	DUOXA2
ENSMUSG00000018909.15	531.018	0.968586	0.323543	2.99369	0.0027563	0.0608727	ENSMUSG00000018909	Arrb1	ARRB1
ENSMUSG00000037977.6	94.2252	-0.727242	0.242988	-2.99292	0.00276324	0.060956	ENSMUSG00000037977	6430571L13Rik	6430571L13RIK
ENSMUSG00000063564.13	33.5768	1.66172	0.555387	2.992	0.00277154	0.061008	ENSMUSG00000063564	Col23a1	COL23A1
ENSMUSG00000030523.18	6.15407	-2.84716	0.951912	-2.99099	0.00278075	0.0611319	ENSMUSG00000030523	Trpm1	TRPM1
ENSMUSG00000064339.1	34454.1	-0.663679	0.221937	-2.99039	0.00278617	0.0611813	ENSMUSG00000064339	mt-Rnr2	MT-RNR2
ENSMUSG00000021484.8	5919.93	-0.378219	0.126529	-2.9892	0.00279712	0.0613516	ENSMUSG00000021484	Lman2	LMAN2
ENSMUSG00000040703.11	459.183	1.30727	0.43749	2.98812	0.00280701	0.0614162	ENSMUSG00000040703	Cyp2s1	CYP2S1
ENSMUSG00000040907.15	240.516	1.27535	0.426808	2.9881	0.00280716	0.0614162	ENSMUSG00000040907	Atp1a3	ATP1A3
ENSMUSG00000058569.8	3491.84	-0.392579	0.131392	-2.98783	0.00280964	0.0614162	ENSMUSG00000058569	Tmed9	TMED9
ENSMUSG00000032261.16	167.975	0.652832	0.218561	2.98696	0.00281771	0.0615226	ENSMUSG00000032261	Sh3bgrl2	SH3BGRL2
ENSMUSG00000054196.7	93.437	0.990431	0.331642	2.98644	0.00282245	0.0615229	ENSMUSG00000054196	Cthrc1	CTHRC1
ENSMUSG00000037843.6	3338.66	-0.694092	0.232446	-2.98604	0.00282616	0.0615229	ENSMUSG00000037843	Vstm2l	VSTM2L
ENSMUSG00000025812.18	1233.25	-0.445033	0.149044	-2.98591	0.00282732	0.0615229	ENSMUSG00000025812	Pard3	PARD3
ENSMUSG00000049091.6	1695.83	-0.568283	0.190368	-2.98518	0.00283411	0.061601	ENSMUSG00000049091	Sephs2	SEPHS2
ENSMUSG00000038564.11	942.667	-0.5646	0.189284	-2.98282	0.00285602	0.0619969	ENSMUSG00000038564	Ift172	IFT172
ENSMUSG00000028454.16	682.24	-0.527783	0.176958	-2.98253	0.00285877	0.0619969	ENSMUSG00000028454	Pigo	PIGO
ENSMUSG00000072812.4	139.537	1.24801	0.418554	2.98172	0.0028663	0.0620294	ENSMUSG00000072812	Ahnak2	AHNAK2
ENSMUSG00000070476.10	345.336	-0.422978	0.14186	-2.98167	0.00286683	0.0620294	ENSMUSG00000070476	Fam217b	FAM217B
ENSMUSG00000034993.7	3099.74	0.427804	0.14351	2.981	0.00287309	0.0620294	ENSMUSG00000034993	Vat1	VAT1
ENSMUSG00000106352.4	4.19426	3.35003	1.1238	2.98099	0.00287317	0.0620294	ENSMUSG00000106352	5033403H07Rik	5033403H07RIK
ENSMUSG00000020135.13	160.666	0.974892	0.327105	2.98037	0.00287903	0.0620475	ENSMUSG00000020135	Apc2	APC2
ENSMUSG00000041681.2	467710	-0.910444	0.305496	-2.98022	0.00288046	0.0620475	ENSMUSG00000041681	Iapp	IAPP
ENSMUSG00000034706.16	124.327	-0.672236	0.225784	-2.97733	0.00290766	0.0625635	ENSMUSG00000034706	Dnaic2	DNAIC2
ENSMUSG00000034607.6	37.8871	1.62859	0.547344	2.97544	0.00292569	0.0628812	ENSMUSG00000034607	Pof1b	POF1B
ENSMUSG00000002980.14	2705.96	0.890701	0.299588	2.97308	0.00294823	0.0632242	ENSMUSG00000002980	Bcam	BCAM
ENSMUSG00000029245.16	61.7356	1.17256	0.394602	2.9715	0.00296353	0.0634816	ENSMUSG00000029245	Epha5	EPHA5
ENSMUSG00000072941.5	239.43	0.991807	0.334123	2.96839	0.00299365	0.0640554	ENSMUSG00000072941	Sod3	SOD3
ENSMUSG00000041598.7	766.735	0.379932	0.128093	2.96605	0.00301648	0.0644723	ENSMUSG00000041598	Cdc42ep4	CDC42EP4
ENSMUSG00000005232.11	37086.7	-0.618545	0.208776	-2.96271	0.0030494	0.0651034	ENSMUSG00000005232	G6pc2	G6PC2
ENSMUSG00000116066.1	38.4293	-1.4063	0.475398	-2.95815	0.00309489	0.0660015	ENSMUSG00000116066	Gm49477	GM49477
ENSMUSG00000039714.9	11.433	-2.081	0.703575	-2.95775	0.00309897	0.0660152	ENSMUSG00000039714	Cplx3	CPLX3
ENSMUSG00000042642.13	827.381	-0.371686	0.125713	-2.95663	0.00311022	0.0661817	ENSMUSG00000042642	Flad1	FLAD1
ENSMUSG00000048978.14	871.941	1.08636	0.367531	2.95583	0.00311834	0.0662153	ENSMUSG00000048978	Nrsn1	NRSN1
ENSMUSG00000050357.9	479.234	0.538723	0.182292	2.95528	0.00312383	0.0662153	ENSMUSG00000050357	Carmil2	CARMIL2
ENSMUSG00000020793.5	7.62724	2.2518	0.762042	2.95496	0.00312709	0.0662153	ENSMUSG00000020793	Galr2	GALR2
ENSMUSG00000035325.16	5904.03	-0.548413	0.185596	-2.95487	0.003128	0.0662153	ENSMUSG00000035325	Sec31a	SEC31A
ENSMUSG00000060780.2	49.0523	0.984394	0.333154	2.95477	0.00312901	0.0662153	ENSMUSG00000060780	Lrrtm1	LRRTM1
ENSMUSG00000027478.15	132.903	-1.26893	0.42958	-2.95388	0.00313805	0.0662605	ENSMUSG00000027478	Dnmt3b	DNMT3B
ENSMUSG00000085069.2	36.238	1.17276	0.397059	2.95362	0.00314066	0.0662605	ENSMUSG00000085069	Prdm16os	PRDM16OS
ENSMUSG00000032038.7	848.509	1.10007	0.372459	2.95354	0.00314148	0.0662605	ENSMUSG00000032038	St3gal4	ST3GAL4
ENSMUSG00000048003.12	16.1508	-1.38466	0.468963	-2.95261	0.00315101	0.0663886	ENSMUSG00000048003	Catsper4	CATSPER4
ENSMUSG00000086386.1	8.79273	1.9154	0.649533	2.94889	0.00318918	0.0671193	ENSMUSG00000086386	Gm12108	GM12108
ENSMUSG00000016346.17	144.582	1.03993	0.353235	2.94402	0.00323979	0.067998	ENSMUSG00000016346	Kcnq2	KCNQ2
ENSMUSG00000052459.13	2493.12	0.423969	0.144013	2.94396	0.00324047	0.067998	ENSMUSG00000052459	Atp6v1a	ATP6V1A
ENSMUSG00000070047.14	1775.98	0.842285	0.286116	2.94385	0.00324153	0.067998	ENSMUSG00000070047	Fat1	FAT1
ENSMUSG00000030203.17	471.745	0.591588	0.201081	2.94204	0.00326059	0.0683232	ENSMUSG00000030203	Dusp16	DUSP16
ENSMUSG00000048834.16	28.2265	1.23123	0.418806	2.93987	0.00328349	0.0687282	ENSMUSG00000048834	Vstm2a	VSTM2A
ENSMUSG00000026421.14	2408.54	0.689017	0.23441	2.93936	0.00328888	0.0687661	ENSMUSG00000026421	Csrp1	CSRP1
ENSMUSG00000026227.11	28.7424	1.614	0.549482	2.9373	0.00331081	0.0690746	ENSMUSG00000026227	2810459M11Rik	2810459M11RIK
ENSMUSG00000020086.6	463.628	-0.386872	0.131776	-2.93583	0.00332659	0.0693286	ENSMUSG00000020086	Macroh2a2	MACROH2A2
ENSMUSG00000033383.6	208.743	1.47662	0.503056	2.93529	0.00333235	0.0693734	ENSMUSG00000033383	Rtp1	RTP1
ENSMUSG00000060224.4	175.281	-0.598147	0.203812	-2.93479	0.00333769	0.0694095	ENSMUSG00000060224	Pyroxd2	PYROXD2
ENSMUSG00000040274.11	164.407	0.895249	0.305201	2.93331	0.00335371	0.0696673	ENSMUSG00000040274	Cdk6	CDK6
ENSMUSG00000047407.17	230.895	0.980717	0.334424	2.93255	0.00336188	0.0697618	ENSMUSG00000047407	Tgif1	TGIF1
ENSMUSG00000043300.2	888.135	-0.93029	0.31738	-2.93115	0.00337705	0.070001	ENSMUSG00000043300	B3galnt1	B3GALNT1
ENSMUSG00000079055.10	14.7837	1.79908	0.613876	2.93069	0.00338212	0.0700306	ENSMUSG00000079055	Slc8a3	SLC8A3
ENSMUSG00000028654.13	70.6807	1.24312	0.424288	2.92991	0.00339063	0.0700645	ENSMUSG00000028654	Mycl	MYCL
ENSMUSG00000033491.13	16.0619	1.47738	0.504286	2.92964	0.00339352	0.0700645	ENSMUSG00000033491	Prss35	PRSS35
ENSMUSG00000093996.2	7.23185	4.78505	1.63348	2.92935	0.0033967	0.0700645	ENSMUSG00000093996	Fam205a3	FAM205A3
ENSMUSG00000003410.8	77.8174	1.53699	0.524714	2.9292	0.00339832	0.0700645	ENSMUSG00000003410	Elavl3	ELAVL3
ENSMUSG00000033105.12	735.55	-0.505768	0.172688	-2.92879	0.00340284	0.0700658	ENSMUSG00000033105	Lss	LSS
ENSMUSG00000031853.5	522.597	0.696893	0.237972	2.92847	0.00340634	0.0700658	ENSMUSG00000031853	Map3k21	MAP3K21
ENSMUSG00000010476.14	52.4446	1.0979	0.374941	2.9282	0.00340931	0.0700658	ENSMUSG00000010476	Ebf3	EBF3
ENSMUSG00000015879.8	55.7561	0.948954	0.32447	2.92463	0.00344872	0.0707984	ENSMUSG00000015879	Fam184b	FAM184B
ENSMUSG00000025237.16	1935.99	-0.544313	0.186135	-2.9243	0.00345233	0.0707984	ENSMUSG00000025237	Parp6	PARP6
ENSMUSG00000068452.8	110.255	2.00512	0.685807	2.92374	0.00345853	0.0708502	ENSMUSG00000068452	Duox2	DUOX2
ENSMUSG00000104044.1	8.94545	-2.17048	0.742718	-2.92235	0.00347401	0.0708823	ENSMUSG00000104044	Gm37566	GM37566
ENSMUSG00000034684.12	496.545	0.683526	0.233913	2.92214	0.00347635	0.0708823	ENSMUSG00000034684	Sema3f	SEMA3F
ENSMUSG00000037846.18	108.114	-0.789309	0.270126	-2.922	0.00347793	0.0708823	ENSMUSG00000037846	Rtkn2	RTKN2
ENSMUSG00000068615.4	4687.7	-0.63343	0.21678	-2.92199	0.00347799	0.0708823	ENSMUSG00000068615	Gjd2	GJD2
ENSMUSG00000110146.1	42.6883	-0.799947	0.273774	-2.92193	0.0034787	0.0708823	ENSMUSG00000110146	Gm45487	GM45487
ENSMUSG00000017466.9	2344.79	0.646406	0.22125	2.92162	0.00348221	0.0708823	ENSMUSG00000017466	Timp2	TIMP2
ENSMUSG00000036760.7	4.92167	3.13707	1.07455	2.91944	0.00350662	0.0713038	ENSMUSG00000036760	Kcnk9	KCNK9
ENSMUSG00000027434.11	2950.23	-0.431541	0.147888	-2.91803	0.00352256	0.0714432	ENSMUSG00000027434	Nkx2-2	NKX2-2
ENSMUSG00000039263.16	2917.21	-0.390347	0.133781	-2.9178	0.00352512	0.0714432	ENSMUSG00000039263	Npepl1	NPEPL1
ENSMUSG00000066839.12	499.064	-0.392465	0.13452	-2.91751	0.00352834	0.0714432	ENSMUSG00000066839	Ecsit	ECSIT
ENSMUSG00000034707.7	7527.49	-0.314341	0.107804	-2.91585	0.00354725	0.0716021	ENSMUSG00000034707	Gns	GNS
ENSMUSG00000024401.14	41.823	0.851818	0.292139	2.9158	0.00354778	0.0716021	ENSMUSG00000024401	Tnf	TNF
ENSMUSG00000034701.9	3752.05	-0.478228	0.164016	-2.91574	0.00354851	0.0716021	ENSMUSG00000034701	Neurod1	NEUROD1
ENSMUSG00000028755.3	504.091	-0.788115	0.270318	-2.91551	0.00355107	0.0716021	ENSMUSG00000028755	Cda	CDA
ENSMUSG00000025815.13	142.357	-0.785305	0.269482	-2.91413	0.00356683	0.0718445	ENSMUSG00000025815	Dhtkd1	DHTKD1
ENSMUSG00000071847.13	119.26	1.12734	0.38697	2.91325	0.00357685	0.0719709	ENSMUSG00000071847	Apcdd1	APCDD1
ENSMUSG00000046834.7	93.187	0.793145	0.272291	2.91285	0.00358144	0.071988	ENSMUSG00000046834	Krt1	KRT1
ENSMUSG00000049122.17	7.25893	2.09504	0.719497	2.91181	0.00359339	0.0721529	ENSMUSG00000049122	Frmd3	FRMD3
ENSMUSG00000051652.4	283.411	0.970633	0.333858	2.90732	0.00364538	0.0731205	ENSMUSG00000051652	Lrrc3	LRRC3
ENSMUSG00000035431.4	15.5867	1.63685	0.563479	2.9049	0.00367366	0.0735493	ENSMUSG00000035431	Sstr1	SSTR1
ENSMUSG00000025735.13	205.878	0.794851	0.27363	2.90484	0.0036744	0.0735493	ENSMUSG00000025735	Rhbdl1	RHBDL1
ENSMUSG00000001911.16	1135.82	0.542652	0.186847	2.90425	0.00368128	0.0736103	ENSMUSG00000001911	Nfix	NFIX
ENSMUSG00000031451.6	2066.99	1.03584	0.356767	2.90342	0.00369108	0.0737295	ENSMUSG00000031451	Gas6	GAS6
ENSMUSG00000032269.8	245.566	1.28578	0.442913	2.90301	0.00369595	0.0737503	ENSMUSG00000032269	Htr3a	HTR3A
ENSMUSG00000004044.9	1082.92	0.777492	0.267862	2.90259	0.00370094	0.0737734	ENSMUSG00000004044	Cavin1	CAVIN1
ENSMUSG00000027695.16	471.422	0.927293	0.320099	2.8969	0.00376874	0.075047	ENSMUSG00000027695	Pld1	PLD1
ENSMUSG00000010080.15	331.946	1.42293	0.491748	2.89362	0.00380835	0.0757039	ENSMUSG00000010080	Epn3	EPN3
ENSMUSG00000028195.4	1179.21	0.845922	0.292351	2.89351	0.0038096	0.0757039	ENSMUSG00000028195	Ccn1	CCN1
ENSMUSG00000050212.4	1370.18	-0.611581	0.211463	-2.89214	0.00382632	0.0759579	ENSMUSG00000050212	Eva1b	EVA1B
ENSMUSG00000013236.17	793.039	0.782937	0.270867	2.89049	0.00384642	0.076278	ENSMUSG00000013236	Ptprs	PTPRS
ENSMUSG00000015405.15	2287.52	0.737014	0.255218	2.88779	0.00387961	0.0768353	ENSMUSG00000015405	Ace2	ACE2
ENSMUSG00000097767.8	34.5574	1.43779	0.497928	2.88755	0.00388251	0.0768353	ENSMUSG00000097767	Miat	MIAT
ENSMUSG00000026805.14	13.6584	1.52593	0.528633	2.88655	0.00389493	0.0769532	ENSMUSG00000026805	Barhl1	BARHL1
ENSMUSG00000032334.10	236.603	0.984371	0.341035	2.88642	0.00389646	0.0769532	ENSMUSG00000032334	Loxl1	LOXL1
ENSMUSG00000087476.1	56.9177	-0.912537	0.316253	-2.88546	0.00390837	0.0770394	ENSMUSG00000087476	Rap1gapos	RAP1GAPOS
ENSMUSG00000050587.14	37.097	1.28228	0.444428	2.88523	0.00391124	0.0770394	ENSMUSG00000050587	Lrrc4c	LRRC4C
ENSMUSG00000095115.2	179.328	0.823847	0.285552	2.8851	0.00391285	0.0770394	ENSMUSG00000095115	Itpripl2	ITPRIPL2
ENSMUSG00000056158.14	535.934	-0.787587	0.273299	-2.88177	0.00395443	0.0777785	ENSMUSG00000056158	Car10	CAR10
ENSMUSG00000045045.7	1414.32	-0.422742	0.146711	-2.88145	0.00395849	0.0777789	ENSMUSG00000045045	Lrfn4	LRFN4
ENSMUSG00000001566.9	604.405	-0.577084	0.200333	-2.88063	0.0039688	0.0779019	ENSMUSG00000001566	Mnx1	MNX1
ENSMUSG00000086712.2	41.4327	-0.947967	0.329337	-2.87841	0.00399684	0.0783723	ENSMUSG00000086712	AI427809	AI427809
ENSMUSG00000036330.12	359.645	-0.67799	0.235648	-2.87712	0.00401319	0.0786128	ENSMUSG00000036330	Slc18a1	SLC18A1
ENSMUSG00000032224.15	242.113	0.466113	0.162025	2.87679	0.00401738	0.0786147	ENSMUSG00000032224	Fam81a	FAM81A
ENSMUSG00000042734.6	630.435	0.612524	0.212944	2.87646	0.00402166	0.0786185	ENSMUSG00000042734	Ttc9	TTC9
ENSMUSG00000075012.4	64.8931	0.897484	0.312055	2.87604	0.00402693	0.0786416	ENSMUSG00000075012	Fjx1	FJX1
ENSMUSG00000031996.17	3773.89	0.454165	0.15798	2.87483	0.00404249	0.0788655	ENSMUSG00000031996	Aplp2	APLP2
ENSMUSG00000034810.7	236.879	1.03297	0.359514	2.87323	0.00406295	0.0791308	ENSMUSG00000034810	Scn7a	SCN7A
ENSMUSG00000020605.9	528.387	-0.404826	0.140901	-2.87313	0.00406432	0.0791308	ENSMUSG00000020605	Hs1bp3	HS1BP3
ENSMUSG00000029482.4	1821.89	-0.330484	0.115063	-2.87219	0.00407637	0.0792851	ENSMUSG00000029482	Aacs	AACS
ENSMUSG00000074093.4	1810.31	-0.654038	0.227825	-2.87079	0.00409447	0.0795568	ENSMUSG00000074093	Svip	SVIP
ENSMUSG00000022551.8	1447.31	-0.453089	0.157896	-2.86955	0.00411057	0.0797889	ENSMUSG00000022551	Cyc1	CYC1
ENSMUSG00000042269.15	471.115	-0.674804	0.235205	-2.86901	0.0041176	0.0798449	ENSMUSG00000042269	Fam92b	FAM92B
ENSMUSG00000025173.13	1182.73	-0.400144	0.139581	-2.86674	0.00414722	0.0803382	ENSMUSG00000025173	Wdr45b	WDR45B
ENSMUSG00000025193.14	248.185	-0.696767	0.243098	-2.8662	0.00415433	0.0803951	ENSMUSG00000025193	Cutc	CUTC
ENSMUSG00000105881.1	35.5278	-0.744464	0.25979	-2.86564	0.00416173	0.0804573	ENSMUSG00000105881	4932422M17Rik	4932422M17RIK
ENSMUSG00000030082.14	8411.63	-0.393898	0.137475	-2.86523	0.00416701	0.0804785	ENSMUSG00000030082	Sec61a1	SEC61A1
ENSMUSG00000022309.9	59.4272	0.846557	0.296026	2.85974	0.00423988	0.0818037	ENSMUSG00000022309	Angpt1	ANGPT1
ENSMUSG00000071537.6	15.47	2.23021	0.780033	2.85913	0.0042481	0.0818802	ENSMUSG00000071537	Klrg2	KLRG2
ENSMUSG00000078453.3	1066.03	-0.703797	0.246224	-2.85836	0.0042584	0.0819965	ENSMUSG00000078453	Abracl	ABRACL
ENSMUSG00000024236.18	958.338	-0.604765	0.211839	-2.85484	0.00430588	0.0828278	ENSMUSG00000024236	Svil	SVIL
ENSMUSG00000031951.8	499.838	-0.488025	0.171045	-2.85319	0.00432825	0.0831751	ENSMUSG00000031951	Tmem231	TMEM231
ENSMUSG00000052821.3	19.2582	1.66745	0.584586	2.85236	0.00433956	0.0832505	ENSMUSG00000052821	Cysltr1	CYSLTR1
ENSMUSG00000014444.17	357.304	0.972778	0.341054	2.85227	0.00434083	0.0832505	ENSMUSG00000014444	Piezo1	PIEZO1
ENSMUSG00000022860.15	18.767	1.53518	0.538602	2.8503	0.0043678	0.0836842	ENSMUSG00000022860	Chodl	CHODL
ENSMUSG00000104487.1	14.1929	1.72491	0.605356	2.84941	0.00438008	0.0838361	ENSMUSG00000104487	Gm31373	GM31373
ENSMUSG00000032478.14	162.918	-0.468649	0.164516	-2.84865	0.00439048	0.0839516	ENSMUSG00000032478	Nme6	NME6
ENSMUSG00000028670.14	2531.17	-0.422699	0.148474	-2.84695	0.00441399	0.0843173	ENSMUSG00000028670	Lypla2	LYPLA2
ENSMUSG00000043673.11	16.5841	1.246	0.437818	2.84592	0.0044283	0.0845067	ENSMUSG00000043673	Kcns3	KCNS3
ENSMUSG00000048070.4	200.292	1.42404	0.500488	2.8453	0.00443692	0.0845873	ENSMUSG00000048070	Pirt	PIRT
ENSMUSG00000040562.12	597.195	-0.753212	0.264876	-2.84364	0.0044601	0.084945	ENSMUSG00000040562	Gstm2	GSTM2
ENSMUSG00000039661.14	1381.16	-0.534119	0.187869	-2.84304	0.0044686	0.0850227	ENSMUSG00000039661	Dusp26	DUSP26
ENSMUSG00000002778.14	4120.42	-0.431745	0.151973	-2.84093	0.00449822	0.0855017	ENSMUSG00000002778	Kdelr1	KDELR1
ENSMUSG00000022099.17	253.918	1.0191	0.358822	2.84012	0.00450967	0.0856004	ENSMUSG00000022099	Dmtn	DMTN
ENSMUSG00000001098.15	1325.59	0.435178	0.153235	2.83993	0.00451231	0.0856004	ENSMUSG00000001098	Kctd10	KCTD10
ENSMUSG00000031919.6	1149.81	-1.35684	0.477881	-2.83929	0.00452144	0.0856892	ENSMUSG00000031919	Tmed6	TMED6
ENSMUSG00000033618.7	111.961	0.782196	0.275556	2.83861	0.00453098	0.0857854	ENSMUSG00000033618	Map3k13	MAP3K13
ENSMUSG00000032735.15	89.2305	1.06512	0.375332	2.8378	0.00454263	0.0859104	ENSMUSG00000032735	Ablim3	ABLIM3
ENSMUSG00000106139.1	474.52	-0.524068	0.184701	-2.83739	0.00454839	0.0859104	ENSMUSG00000106139	Gm30648	GM30648
ENSMUSG00000032374.14	156.355	0.989684	0.348823	2.83721	0.00455098	0.0859104	ENSMUSG00000032374	Plod2	PLOD2
ENSMUSG00000068154.5	4528.47	-0.471937	0.16641	-2.83599	0.00456846	0.0860532	ENSMUSG00000068154	Insm1	INSM1
ENSMUSG00000058975.7	28.4814	1.02437	0.361211	2.83592	0.00456942	0.0860532	ENSMUSG00000058975	Kcnc1	KCNC1
ENSMUSG00000039958.17	84.5215	0.780004	0.275062	2.83574	0.00457197	0.0860532	ENSMUSG00000039958	Etfbkmt	ETFBKMT
ENSMUSG00000111443.1	88.6228	-0.707329	0.249699	-2.83273	0.00461521	0.0866978	ENSMUSG00000111443	Gm46123	GM46123
ENSMUSG00000028098.13	1270.7	-0.412398	0.145583	-2.83273	0.00461523	0.0866978	ENSMUSG00000028098	Rnf115	RNF115
ENSMUSG00000048537.16	595.12	0.503662	0.177823	2.83238	0.00462032	0.0867088	ENSMUSG00000048537	Phldb1	PHLDB1
ENSMUSG00000085830.1	3.69543	3.18098	1.12377	2.83063	0.00464567	0.0870995	ENSMUSG00000085830	Grin1os	GRIN1OS
ENSMUSG00000046793.8	7.49381	2.15697	0.762148	2.83012	0.00465302	0.0871524	ENSMUSG00000046793	Gpr61	GPR61
ENSMUSG00000027956.11	72.8708	-0.860346	0.304124	-2.82893	0.0046704	0.0873696	ENSMUSG00000027956	Tmem144	TMEM144
ENSMUSG00000028369.15	59.4009	1.54198	0.545118	2.8287	0.0046737	0.0873696	ENSMUSG00000028369	Svep1	SVEP1
ENSMUSG00000039000.8	2001.59	-0.407962	0.144248	-2.82821	0.00468097	0.0874205	ENSMUSG00000039000	Ube3c	UBE3C
ENSMUSG00000097178.7	2.96718	3.37103	1.19208	2.82785	0.00468618	0.087433	ENSMUSG00000097178	2310002F09Rik	2310002F09RIK
ENSMUSG00000027777.15	271.22	0.599976	0.212205	2.82734	0.00469361	0.0874867	ENSMUSG00000027777	Schip1	SCHIP1
ENSMUSG00000031576.16	121.181	-0.658127	0.23287	-2.82615	0.00471109	0.0877275	ENSMUSG00000031576	Kcnu1	KCNU1
ENSMUSG00000031985.9	990.169	-0.50445	0.178551	-2.82524	0.00472455	0.0878932	ENSMUSG00000031985	Gnpat	GNPAT
ENSMUSG00000012422.14	1199.13	-0.439663	0.155658	-2.82455	0.00473468	0.0879382	ENSMUSG00000012422	Tmem167	TMEM167
ENSMUSG00000116121.1	33.1252	-0.908068	0.321502	-2.82445	0.00473612	0.0879382	ENSMUSG00000116121	Gm49486	GM49486
ENSMUSG00000024534.15	16.3906	1.91175	0.676975	2.82396	0.00474341	0.0879887	ENSMUSG00000024534	Sncaip	SNCAIP
ENSMUSG00000048826.7	1114.54	-0.383204	0.135731	-2.82327	0.00475364	0.0880936	ENSMUSG00000048826	Dact2	DACT2
ENSMUSG00000037580.10	2933.28	-0.471543	0.16725	-2.81939	0.00481144	0.0890788	ENSMUSG00000037580	Gch1	GCH1
ENSMUSG00000055116.8	162.53	1.08334	0.384394	2.81831	0.0048277	0.0892939	ENSMUSG00000055116	Arntl	ARNTL
ENSMUSG00000026525.9	71.2494	0.824768	0.292846	2.81639	0.00485672	0.0897444	ENSMUSG00000026525	Opn3	OPN3
ENSMUSG00000053852.11	5.7362	2.48027	0.880856	2.81575	0.00486636	0.0898043	ENSMUSG00000053852	Adgrg4	ADGRG4
ENSMUSG00000015224.10	59.1288	0.857692	0.304626	2.81556	0.0048693	0.0898043	ENSMUSG00000015224	Cyp2j9	CYP2J9
ENSMUSG00000017167.6	69.761	0.792167	0.281409	2.815	0.00487766	0.0898542	ENSMUSG00000017167	Cntnap1	CNTNAP1
ENSMUSG00000056427.10	131.166	0.905189	0.321586	2.81476	0.00488135	0.0898542	ENSMUSG00000056427	Slit3	SLIT3
ENSMUSG00000046223.10	199.179	1.03114	0.366586	2.81282	0.00491095	0.0903127	ENSMUSG00000046223	Plaur	PLAUR
ENSMUSG00000043456.17	29.6719	1.2649	0.449779	2.81226	0.00491945	0.0903825	ENSMUSG00000043456	Zfp536	ZFP536
ENSMUSG00000026269.14	2811.45	-0.490339	0.174437	-2.81098	0.00493904	0.0905695	ENSMUSG00000026269	Rnpepl1	RNPEPL1
ENSMUSG00000026628.13	4286.13	0.625054	0.222397	2.81054	0.00494592	0.0906092	ENSMUSG00000026628	Atf3	ATF3
ENSMUSG00000021175.15	68.7004	1.02525	0.364837	2.81015	0.00495177	0.0906302	ENSMUSG00000021175	Cdca7l	CDCA7L
ENSMUSG00000029228.15	386.855	-0.372754	0.132696	-2.80908	0.00496839	0.090841	ENSMUSG00000029228	Lnx1	LNX1
ENSMUSG00000047604.3	83.7	0.918891	0.327148	2.80879	0.00497273	0.090841	ENSMUSG00000047604	Frat2	FRAT2
ENSMUSG00000021203.15	241.432	-0.513447	0.182936	-2.8067	0.00500519	0.0913472	ENSMUSG00000021203	Otub2	OTUB2
ENSMUSG00000074890.4	534.903	-0.421692	0.15031	-2.80549	0.00502408	0.091605	ENSMUSG00000074890	Lcmt2	LCMT2
ENSMUSG00000026639.18	286.242	0.618034	0.220363	2.80462	0.00503756	0.0917638	ENSMUSG00000026639	Lamb3	LAMB3
ENSMUSG00000087200.1	108.744	-0.596684	0.212828	-2.8036	0.00505354	0.0919677	ENSMUSG00000087200	Lrp8os3	LRP8OS3
ENSMUSG00000029521.7	30.0206	1.17426	0.41909	2.80193	0.00507977	0.0923464	ENSMUSG00000029521	Chek2	CHEK2
ENSMUSG00000112980.1	29.3897	0.959619	0.342517	2.80167	0.00508395	0.0923464	ENSMUSG00000112980	D430020J02Rik	D430020J02RIK
ENSMUSG00000034958.11	71.7959	1.0586	0.377976	2.80069	0.00509929	0.0925378	ENSMUSG00000034958	Atcay	ATCAY
ENSMUSG00000050708.16	42474.8	-0.442071	0.158006	-2.79781	0.00514505	0.0932802	ENSMUSG00000050708	Ftl1	FTL1
ENSMUSG00000027199.14	2322.13	-1.12026	0.400768	-2.79528	0.00518548	0.0939246	ENSMUSG00000027199	Gatm	GATM
ENSMUSG00000031490.6	474.308	-0.762787	0.273248	-2.79155	0.00524555	0.0947907	ENSMUSG00000031490	Eif4ebp1	EIF4EBP1
ENSMUSG00000008090.14	89.997	0.929036	0.332821	2.7914	0.00524808	0.0947907	ENSMUSG00000008090	Fgfrl1	FGFRL1
ENSMUSG00000041343.19	125.025	0.600305	0.215127	2.79047	0.00526314	0.0949735	ENSMUSG00000041343	Ankrd42	ANKRD42
ENSMUSG00000042510.7	257.115	0.947857	0.339745	2.78991	0.00527226	0.0950488	ENSMUSG00000042510	AA986860	AA986860
ENSMUSG00000040270.16	171.364	1.12819	0.404621	2.78827	0.00529899	0.0953633	ENSMUSG00000040270	Bach2	BACH2
ENSMUSG00000029458.14	827.535	-0.334999	0.12016	-2.78794	0.00530446	0.0953633	ENSMUSG00000029458	Brap	BRAP
ENSMUSG00000104339.1	37.9782	-1.06682	0.382657	-2.78793	0.00530457	0.0953633	ENSMUSG00000104339	C130089K02Rik	C130089K02RIK
ENSMUSG00000021087.18	1194.41	0.961166	0.344943	2.78645	0.00532883	0.0957101	ENSMUSG00000021087	Rtn1	RTN1
ENSMUSG00000105265.4	6.11867	2.7062	0.971718	2.78496	0.00535343	0.096062	ENSMUSG00000105265	Sox2ot	SOX2OT
ENSMUSG00000029055.17	29.8621	1.50921	0.542486	2.78203	0.00540193	0.0966613	ENSMUSG00000029055	Plch2	PLCH2
ENSMUSG00000063430.9	36.5641	1.01339	0.364268	2.78198	0.00540284	0.0966613	ENSMUSG00000063430	Wscd2	WSCD2
ENSMUSG00000052852.8	241.056	1.23726	0.444771	2.78179	0.00540593	0.0966613	ENSMUSG00000052852	Reep1	REEP1
ENSMUSG00000036641.9	391.365	0.700224	0.251722	2.78173	0.00540692	0.0966613	ENSMUSG00000036641	Ccdc148	CCDC148
ENSMUSG00000022426.6	920.536	-0.387266	0.139299	-2.78011	0.00543409	0.0969925	ENSMUSG00000022426	Josd1	JOSD1
ENSMUSG00000032773.9	62.9764	1.08011	0.388568	2.77972	0.00544053	0.0969925	ENSMUSG00000032773	Chrm1	CHRM1
ENSMUSG00000025871.18	5757.76	-0.497582	0.179019	-2.7795	0.00544435	0.0969925	ENSMUSG00000025871	4833439L19Rik	4833439L19RIK
ENSMUSG00000001985.9	24.3051	1.46024	0.525376	2.77942	0.00544562	0.0969925	ENSMUSG00000001985	Grik3	GRIK3
ENSMUSG00000093661.1	1133.59	-0.491612	0.177067	-2.77642	0.00549611	0.0978012	ENSMUSG00000093661	Eif4e3	EIF4E3
ENSMUSG00000042694.17	147.577	0.564678	0.203432	2.77576	0.00550736	0.0978558	ENSMUSG00000042694	Stn1	STN1
ENSMUSG00000042638.14	850.335	-0.584068	0.210431	-2.77558	0.00551026	0.0978558	ENSMUSG00000042638	Gucy2c	GUCY2C
ENSMUSG00000118120.1	5.3408	-2.00331	0.721826	-2.77534	0.00551444	0.0978558	ENSMUSG00000118120	Gm33732	GM33732
ENSMUSG00000005686.17	110.421	0.798043	0.287722	2.77366	0.00554301	0.0982722	ENSMUSG00000005686	Ampd3	AMPD3
ENSMUSG00000052135.8	518.263	-0.427244	0.154063	-2.77317	0.00555135	0.0983295	ENSMUSG00000052135	Foxo6	FOXO6
ENSMUSG00000040111.17	802.865	0.497883	0.179624	2.7718	0.00557476	0.0986532	ENSMUSG00000040111	Gramd1b	GRAMD1B
ENSMUSG00000034040.16	42.3843	1.16149	0.41941	2.76935	0.00561682	0.0992425	ENSMUSG00000034040	Galnt17	GALNT17
ENSMUSG00000027955.16	95.4506	0.964005	0.348109	2.76926	0.00561837	0.0992425	ENSMUSG00000027955	Gask1b	GASK1B
ENSMUSG00000117901.1	118.692	-0.684457	0.247287	-2.76787	0.00564247	0.0994204	ENSMUSG00000117901	AC109619.1	AC109619.1
ENSMUSG00000020354.15	25.0916	1.33996	0.484118	2.76784	0.00564284	0.0994204	ENSMUSG00000020354	Sgcd	SGCD
ENSMUSG00000000632.13	49.361	1.07188	0.387269	2.76778	0.00564395	0.0994204	ENSMUSG00000000632	Sez6	SEZ6
ENSMUSG00000038777.19	153.889	0.906464	0.327549	2.76741	0.00565031	0.0994414	ENSMUSG00000038777	Sema6c	SEMA6C
ENSMUSG00000109321.1	851.142	-0.708118	0.255942	-2.76672	0.00566236	0.0995623	ENSMUSG00000109321	A330076H08Rik	A330076H08RIK
ENSMUSG00000039089.15	254.539	0.500843	0.181142	2.76492	0.00569361	0.10002	ENSMUSG00000039089	L3mbtl3	L3MBTL3
ENSMUSG00000033006.10	68.6082	1.13213	0.40968	2.76344	0.00571958	0.100385	ENSMUSG00000033006	Sox10	SOX10
ENSMUSG00000020828.13	174.322	1.02827	0.372382	2.76132	0.00575683	0.100903	ENSMUSG00000020828	Pld2	PLD2
ENSMUSG00000008153.12	1016.37	0.522989	0.189409	2.76116	0.00575957	0.100903	ENSMUSG00000008153	Clstn3	CLSTN3
ENSMUSG00000041625.15	889.668	-0.522611	0.189427	-2.7589	0.00579961	0.101386	ENSMUSG00000041625	Ggact	GGACT
ENSMUSG00000045589.7	214.207	0.753065	0.272992	2.75856	0.0058057	0.101386	ENSMUSG00000045589	Frrs1l	FRRS1L
ENSMUSG00000029762.6	56.2229	1.27022	0.460468	2.75854	0.00580605	0.101386	ENSMUSG00000029762	Akr1b8	AKR1B8
ENSMUSG00000026483.13	365.543	0.910052	0.329919	2.75841	0.00580825	0.101386	ENSMUSG00000026483	Fam129a	FAM129A
ENSMUSG00000002985.16	7510.3	0.790845	0.286983	2.75572	0.00585628	0.10198	ENSMUSG00000002985	Apoe	APOE
ENSMUSG00000046607.6	2.95966	3.52382	1.27877	2.75564	0.00585778	0.10198	ENSMUSG00000046607	Hrk	HRK
ENSMUSG00000000202.9	632.985	-0.510608	0.185297	-2.75562	0.00585818	0.10198	ENSMUSG00000000202	Btbd17	BTBD17
ENSMUSG00000040188.10	1634.59	-0.346984	0.125947	-2.755	0.00586915	0.10206	ENSMUSG00000040188	Scamp2	SCAMP2
ENSMUSG00000015981.12	66.8088	1.42627	0.517757	2.75471	0.00587447	0.10206	ENSMUSG00000015981	Stk32c	STK32C
ENSMUSG00000006219.12	81.2603	0.932736	0.338643	2.75434	0.00588109	0.10206	ENSMUSG00000006219	Fblim1	FBLIM1
ENSMUSG00000021108.18	314.42	0.86139	0.312758	2.75418	0.00588397	0.10206	ENSMUSG00000021108	Prkch	PRKCH
ENSMUSG00000078923.10	3261.63	-0.328656	0.119451	-2.75139	0.00593429	0.10284	ENSMUSG00000078923	Ube2v1	UBE2V1
ENSMUSG00000113502.1	10.3887	-1.78514	0.649195	-2.74977	0.00596376	0.103257	ENSMUSG00000113502	Gm47411	GM47411
ENSMUSG00000025915.14	688.389	0.449394	0.163454	2.74936	0.00597127	0.103294	ENSMUSG00000025915	Sgk3	SGK3
ENSMUSG00000041120.6	925.865	0.573456	0.208644	2.7485	0.00598695	0.103473	ENSMUSG00000041120	Nbl1	NBL1
ENSMUSG00000046768.13	140.924	0.574183	0.209001	2.74728	0.00600922	0.103764	ENSMUSG00000046768	Rhoj	RHOJ
ENSMUSG00000033910.13	259.768	0.71441	0.260112	2.74655	0.00602261	0.103886	ENSMUSG00000033910	Gucy1a1	GUCY1A1
ENSMUSG00000044674.6	170.904	0.664377	0.241917	2.74631	0.00602706	0.103886	ENSMUSG00000044674	Fzd1	FZD1
ENSMUSG00000036863.12	226.649	-0.560678	0.204277	-2.74469	0.0060568	0.104279	ENSMUSG00000036863	Syde2	SYDE2
ENSMUSG00000037617.12	165.207	0.627471	0.228668	2.74402	0.00606914	0.104279	ENSMUSG00000037617	Spag1	SPAG1
ENSMUSG00000102796.1	7.67361	1.92167	0.700339	2.74391	0.00607121	0.104279	ENSMUSG00000102796	Gm37711	GM37711
ENSMUSG00000021852.14	9.70589	1.86246	0.678765	2.74389	0.00607157	0.104279	ENSMUSG00000021852	Slc35f4	SLC35F4
ENSMUSG00000025870.10	220.85	0.416903	0.151962	2.74346	0.00607958	0.104324	ENSMUSG00000025870	Arl10	ARL10
ENSMUSG00000032562.13	9172.44	-0.233927	0.085307	-2.74218	0.00610333	0.104638	ENSMUSG00000032562	Gnai2	GNAI2
ENSMUSG00000062393.13	4.14639	2.57739	0.940445	2.7406	0.00613264	0.104955	ENSMUSG00000062393	Dgkk	DGKK
ENSMUSG00000027420.13	20.3376	1.11056	0.405225	2.7406	0.00613274	0.104955	ENSMUSG00000027420	Bfsp1	BFSP1
ENSMUSG00000079434.8	76.8037	-0.704822	0.257214	-2.74022	0.00613985	0.104983	ENSMUSG00000079434	Neu2	NEU2
ENSMUSG00000115100.1	9.4799	1.51154	0.551676	2.73991	0.00614559	0.104988	ENSMUSG00000115100	Gm34934	GM34934
ENSMUSG00000028469.15	938.155	0.458021	0.167205	2.73928	0.00615734	0.105095	ENSMUSG00000028469	Npr2	NPR2
ENSMUSG00000036368.8	104.458	-0.598972	0.218838	-2.73705	0.00619929	0.105718	ENSMUSG00000036368	Rmdn2	RMDN2
ENSMUSG00000026797.16	5642.55	-0.281946	0.103115	-2.73428	0.00625162	0.106421	ENSMUSG00000026797	Stxbp1	STXBP1
ENSMUSG00000022658.10	151.876	1.05698	0.386737	2.73307	0.00627463	0.106719	ENSMUSG00000022658	Tagln3	TAGLN3
ENSMUSG00000027351.14	340.754	0.567255	0.207868	2.72892	0.00635423	0.107977	ENSMUSG00000027351	Spred1	SPRED1
ENSMUSG00000055150.15	88.4593	-0.755446	0.276972	-2.72752	0.00638119	0.108223	ENSMUSG00000055150	Zfp78	ZFP78
ENSMUSG00000029102.9	2308.58	-0.486129	0.178235	-2.72745	0.0063825	0.108223	ENSMUSG00000029102	Hgfac	HGFAC
ENSMUSG00000103965.1	124.615	-1.01375	0.371706	-2.7273	0.00638558	0.108223	ENSMUSG00000103965	Gm30173	GM30173
ENSMUSG00000055737.12	2545.21	-0.558512	0.204808	-2.727	0.00639138	0.108226	ENSMUSG00000055737	Ghr	GHR
ENSMUSG00000032238.17	1126.63	-0.604174	0.221655	-2.72574	0.0064158	0.108544	ENSMUSG00000032238	Rora	RORA
ENSMUSG00000037224.15	23.3398	1.59459	0.585237	2.7247	0.00643607	0.108791	ENSMUSG00000037224	Zfyve28	ZFYVE28
ENSMUSG00000030638.13	15.3083	1.17569	0.431617	2.72391	0.00645138	0.108954	ENSMUSG00000030638	Sh3gl3	SH3GL3
ENSMUSG00000025188.15	735.464	-0.566796	0.208106	-2.72359	0.00645766	0.108964	ENSMUSG00000025188	Hps1	HPS1
ENSMUSG00000073077.7	32.4667	1.19977	0.440753	2.7221	0.00648688	0.109305	ENSMUSG00000073077	Cfap47	CFAP47
ENSMUSG00000048458.8	84.6653	0.753783	0.276925	2.72198	0.00648921	0.109305	ENSMUSG00000048458	Inka2	INKA2
ENSMUSG00000022489.6	116.973	1.03364	0.379898	2.72083	0.00651185	0.109591	ENSMUSG00000022489	Pde1b	PDE1B
ENSMUSG00000062175.13	100.65	1.17357	0.431535	2.71952	0.00653766	0.109929	ENSMUSG00000062175	Tgif2	TGIF2
ENSMUSG00000118356.1	47.187	-0.993884	0.365676	-2.71794	0.00656906	0.11036	ENSMUSG00000118356	Gm50353	GM50353
ENSMUSG00000030268.17	16.8569	2.25741	0.830707	2.71746	0.00657846	0.110422	ENSMUSG00000030268	Bcat1	BCAT1
ENSMUSG00000032280.16	2065.31	-0.564697	0.207883	-2.71642	0.00659925	0.110529	ENSMUSG00000032280	Tle3	TLE3
ENSMUSG00000056665.2	402.138	-0.449285	0.165404	-2.71628	0.00660192	0.110529	ENSMUSG00000056665	Them6	THEM6
ENSMUSG00000105606.1	23.6442	2.3226	0.855069	2.71628	0.00660206	0.110529	ENSMUSG00000105606	Igkv2-109	IGKV2-109
ENSMUSG00000067158.9	68.8224	0.841635	0.310061	2.71441	0.0066393	0.111023	ENSMUSG00000067158	Col4a4	COL4A4
ENSMUSG00000031399.15	911.17	-0.380579	0.140217	-2.71422	0.00664313	0.111023	ENSMUSG00000031399	Fam3a	FAM3A
ENSMUSG00000036943.9	467.139	0.590612	0.217653	2.71354	0.00665677	0.111154	ENSMUSG00000036943	Rab8b	RAB8B
ENSMUSG00000021747.12	72.4558	0.984779	0.363123	2.71197	0.00668847	0.11153	ENSMUSG00000021747	4930452B06Rik	4930452B06RIK
ENSMUSG00000107985.1	5.201	-2.42753	0.895156	-2.71185	0.00669087	0.11153	ENSMUSG00000107985	Gm35037	GM35037
ENSMUSG00000018012.11	131.505	0.698875	0.257885	2.71003	0.00672776	0.112048	ENSMUSG00000018012	Rac3	RAC3
ENSMUSG00000025658.16	22.5655	1.49937	0.553692	2.70796	0.0067699	0.112652	ENSMUSG00000025658	Cnksr2	CNKSR2
ENSMUSG00000045312.12	147.766	0.568208	0.209878	2.70732	0.0067828	0.112722	ENSMUSG00000045312	Lhfpl2	LHFPL2
ENSMUSG00000020891.11	40.8294	-0.934712	0.345272	-2.70718	0.00678582	0.112722	ENSMUSG00000020891	Alox8	ALOX8
ENSMUSG00000067424.13	226.563	-0.503295	0.186026	-2.7055	0.00682007	0.113011	ENSMUSG00000067424	Zfp563	ZFP563
ENSMUSG00000021666.16	691.855	-0.361186	0.133501	-2.7055	0.0068202	0.113011	ENSMUSG00000021666	Gfm2	GFM2
ENSMUSG00000031775.5	70.239	1.30669	0.48298	2.70547	0.00682083	0.113011	ENSMUSG00000031775	Pllp	PLLP
ENSMUSG00000110386.1	130.393	0.620001	0.229216	2.70488	0.00683284	0.113057	ENSMUSG00000110386	Gm42031	GM42031
ENSMUSG00000033768.17	208.19	0.990617	0.36625	2.70476	0.0068354	0.113057	ENSMUSG00000033768	Nrxn2	NRXN2
ENSMUSG00000037440.8	110.406	1.4078	0.520647	2.70395	0.00685213	0.113237	ENSMUSG00000037440	Vnn1	VNN1
ENSMUSG00000026435.15	65.3358	1.17242	0.433693	2.70335	0.00686448	0.113316	ENSMUSG00000026435	Slc45a3	SLC45A3
ENSMUSG00000022315.3	9329.21	-0.439951	0.162755	-2.70314	0.00686872	0.113316	ENSMUSG00000022315	Slc30a8	SLC30A8
ENSMUSG00000031150.13	309.466	0.577802	0.21384	2.70202	0.00689189	0.113601	ENSMUSG00000031150	Ccdc120	CCDC120
ENSMUSG00000107018.1	3.69383	5.06021	1.87319	2.70139	0.00690504	0.113689	ENSMUSG00000107018	Gm43694	GM43694
ENSMUSG00000075704.16	456.017	-0.589555	0.218269	-2.70104	0.00691222	0.113689	ENSMUSG00000075704	Txnrd2	TXNRD2
ENSMUSG00000041607.17	1659.66	0.477204	0.176682	2.70091	0.00691494	0.113689	ENSMUSG00000041607	Mbp	MBP
ENSMUSG00000036030.9	13.4852	1.86222	0.689761	2.69981	0.00693792	0.113969	ENSMUSG00000036030	Prtg	PRTG
ENSMUSG00000024552.16	25.3096	-1.19729	0.443684	-2.69851	0.00696499	0.114316	ENSMUSG00000024552	Slc14a2	SLC14A2
ENSMUSG00000047945.6	824.367	0.934906	0.346523	2.69796	0.00697652	0.114408	ENSMUSG00000047945	Marcksl1	MARCKSL1
ENSMUSG00000086012.2	4.46581	-2.90232	1.07606	-2.69717	0.0069932	0.114584	ENSMUSG00000086012	Gm15902	GM15902
ENSMUSG00000032174.5	6.81349	1.85251	0.686997	2.69654	0.00700646	0.114703	ENSMUSG00000032174	Icam5	ICAM5
ENSMUSG00000026971.15	52.5003	1.25913	0.467025	2.69607	0.00701637	0.114768	ENSMUSG00000026971	Itgb6	ITGB6
ENSMUSG00000076480.2	5.89334	3.24268	1.20308	2.69531	0.0070323	0.114931	ENSMUSG00000076480	Trbv29	TRBV29
ENSMUSG00000031374.13	518.129	-0.490077	0.181898	-2.69425	0.00705478	0.1152	ENSMUSG00000031374	Zfp92	ZFP92
ENSMUSG00000032020.15	153.577	0.628497	0.233312	2.69381	0.007064	0.115253	ENSMUSG00000032020	Ubash3b	UBASH3B
ENSMUSG00000097204.2	195.049	-0.677434	0.251515	-2.69341	0.00707244	0.115293	ENSMUSG00000097204	Gm17690	GM17690
ENSMUSG00000042258.13	3338.44	-0.571967	0.212416	-2.69268	0.00708813	0.115451	ENSMUSG00000042258	Isl1	ISL1
ENSMUSG00000020964.14	3970.4	-0.648526	0.240993	-2.69105	0.00712269	0.115884	ENSMUSG00000020964	Sel1l	SEL1L
ENSMUSG00000093805.7	23.7361	2.34075	0.869889	2.69086	0.0071268	0.115884	ENSMUSG00000093805	Gal3st2b	GAL3ST2B
ENSMUSG00000029581.14	489.07	1.51683	0.563897	2.68991	0.00714708	0.116037	ENSMUSG00000029581	Fscn1	FSCN1
ENSMUSG00000063727.3	303.167	0.722406	0.268567	2.68986	0.00714826	0.116037	ENSMUSG00000063727	Tnfrsf11b	TNFRSF11B
ENSMUSG00000043857.16	24.6752	1.02915	0.382643	2.68957	0.00715431	0.116037	ENSMUSG00000043857	Mgat5b	MGAT5B
ENSMUSG00000050382.14	16.8522	1.10832	0.412143	2.68916	0.00716317	0.116083	ENSMUSG00000050382	Kif7	KIF7
ENSMUSG00000022037.15	21145.3	0.693503	0.25799	2.6881	0.00718594	0.116216	ENSMUSG00000022037	Clu	CLU
ENSMUSG00000033256.14	210.419	0.679888	0.252931	2.68804	0.00718732	0.116216	ENSMUSG00000033256	Shf	SHF
ENSMUSG00000054146.8	8.11787	2.02525	0.753482	2.68785	0.00719136	0.116216	ENSMUSG00000054146	Krt15	KRT15
ENSMUSG00000079262.3	321.736	-0.77663	0.288962	-2.68766	0.00719554	0.116216	ENSMUSG00000079262	Slco1a6	SLCO1A6
ENSMUSG00000016552.13	637.611	-0.626417	0.233139	-2.68688	0.0072122	0.116387	ENSMUSG00000016552	Foxred2	FOXRED2
ENSMUSG00000031482.9	368.782	-0.760068	0.283036	-2.68541	0.00724404	0.116803	ENSMUSG00000031482	Slc25a15	SLC25A15
ENSMUSG00000020806.15	233.014	0.572047	0.213063	2.68488	0.00725569	0.116893	ENSMUSG00000020806	Rhbdf2	RHBDF2
ENSMUSG00000049907.8	46.5157	1.00357	0.37384	2.68448	0.00726429	0.116934	ENSMUSG00000049907	Rasl11b	RASL11B
ENSMUSG00000042182.16	25.892	1.26852	0.47265	2.68385	0.00727793	0.117055	ENSMUSG00000042182	Bend6	BEND6
ENSMUSG00000039578.17	639.737	-0.583005	0.217324	-2.68265	0.00730406	0.117378	ENSMUSG00000039578	Ccser1	CCSER1
ENSMUSG00000047342.17	16.7952	1.40899	0.525743	2.68	0.00736215	0.118212	ENSMUSG00000047342	Zfp286	ZFP286
ENSMUSG00000109097.1	5.29649	2.29226	0.855793	2.67852	0.00739478	0.118637	ENSMUSG00000109097	Gm29683	GM29683
ENSMUSG00000020431.5	92.0281	0.766459	0.286183	2.67821	0.00740159	0.118647	ENSMUSG00000020431	Adcy1	ADCY1
ENSMUSG00000019762.4	31.1022	-1.31729	0.491944	-2.67773	0.00741231	0.11872	ENSMUSG00000019762	Iyd	IYD
ENSMUSG00000031485.15	2171.2	-0.351262	0.131203	-2.67725	0.00742299	0.118793	ENSMUSG00000031485	Plpbp	PLPBP
ENSMUSG00000109203.1	7.10451	-1.6115	0.602308	-2.67555	0.00746076	0.119298	ENSMUSG00000109203	Gm32849	GM32849
ENSMUSG00000017144.8	199.314	0.71648	0.268148	2.67196	0.00754093	0.120381	ENSMUSG00000017144	Rnd3	RND3
ENSMUSG00000004892.13	37.2028	1.65899	0.62089	2.67196	0.00754103	0.120381	ENSMUSG00000004892	Bcan	BCAN
ENSMUSG00000005320.9	245.919	1.17145	0.438485	2.67159	0.00754931	0.120413	ENSMUSG00000005320	Fgfr4	FGFR4
ENSMUSG00000022265.7	4601.16	-0.403763	0.15115	-2.67127	0.00755659	0.12043	ENSMUSG00000022265	Ank	ANK
ENSMUSG00000079508.8	416.707	-0.679254	0.254342	-2.67063	0.00757097	0.120494	ENSMUSG00000079508	Apoo	APOO
ENSMUSG00000064354.1	58257.3	-0.876134	0.328075	-2.67053	0.00757317	0.120494	ENSMUSG00000064354	mt-Co2	MT-CO2
ENSMUSG00000028382.15	3752.06	-0.534667	0.200267	-2.66976	0.00759049	0.12067	ENSMUSG00000028382	Ptbp3	PTBP3
ENSMUSG00000028093.15	464.139	-0.413635	0.155049	-2.66777	0.00763554	0.121286	ENSMUSG00000028093	Acp6	ACP6
ENSMUSG00000000253.13	4162.73	-0.625043	0.234344	-2.6672	0.00764857	0.121303	ENSMUSG00000000253	Gmpr	GMPR
ENSMUSG00000045871.5	1400.62	-0.695346	0.260758	-2.66663	0.00766157	0.121303	ENSMUSG00000045871	Slitrk6	SLITRK6
ENSMUSG00000027134.4	283.212	0.607691	0.227899	2.6665	0.00766458	0.121303	ENSMUSG00000027134	Lpcat4	LPCAT4
ENSMUSG00000028364.15	67.8005	1.70123	0.638035	2.66636	0.00766775	0.121303	ENSMUSG00000028364	Tnc	TNC
ENSMUSG00000040969.14	53.5756	0.912396	0.34219	2.66634	0.00766813	0.121303	ENSMUSG00000040969	Arhgef38	ARHGEF38
ENSMUSG00000066513.4	49.3041	-1.79092	0.671854	-2.66565	0.00768408	0.121433	ENSMUSG00000066513	Klk1b4	KLK1B4
ENSMUSG00000042671.12	46.4613	0.883767	0.331566	2.66543	0.00768898	0.121433	ENSMUSG00000042671	Rgs8	RGS8
ENSMUSG00000028036.6	81.2222	1.50966	0.566452	2.66512	0.00769606	0.121445	ENSMUSG00000028036	Ptgfr	PTGFR
ENSMUSG00000019832.5	115.693	1.0379	0.389699	2.66333	0.00773712	0.1219	ENSMUSG00000019832	Rab32	RAB32
ENSMUSG00000030554.16	132.602	1.31046	0.49204	2.66331	0.00773755	0.1219	ENSMUSG00000030554	Synm	SYNM
ENSMUSG00000040322.10	320.416	0.635108	0.23871	2.66058	0.00780056	0.122713	ENSMUSG00000040322	Slc25a24	SLC25A24
ENSMUSG00000037190.12	355.28	-0.494896	0.186015	-2.66052	0.00780195	0.122713	ENSMUSG00000037190	Cyb561d2	CYB561D2
ENSMUSG00000032366.15	1738.11	0.454363	0.170816	2.65995	0.00781513	0.12282	ENSMUSG00000032366	Tpm1	TPM1
ENSMUSG00000027849.19	107.739	0.959478	0.360856	2.6589	0.00783973	0.123023	ENSMUSG00000027849	Syt6	SYT6
ENSMUSG00000029094.12	177.081	0.643681	0.24209	2.65885	0.00784085	0.123023	ENSMUSG00000029094	Afap1	AFAP1
ENSMUSG00000051397.5	60.2375	1.59316	0.59955	2.65726	0.0078778	0.123366	ENSMUSG00000051397	Tacstd2	TACSTD2
ENSMUSG00000089917.7	542.566	-0.441403	0.166112	-2.65725	0.007878	0.123366	ENSMUSG00000089917	Uckl1	UCKL1
ENSMUSG00000083218.2	7.04554	1.77978	0.669824	2.65709	0.00788196	0.123366	ENSMUSG00000083218	Gm16425	GM16425
ENSMUSG00000049154.12	1008.78	-0.769653	0.289732	-2.65643	0.00789728	0.123506	ENSMUSG00000049154	Fam183b	FAM183B
ENSMUSG00000031391.18	311.814	0.850702	0.320354	2.6555	0.00791902	0.123745	ENSMUSG00000031391	L1cam	L1CAM
ENSMUSG00000015090.13	38.2518	1.45421	0.547679	2.65522	0.00792559	0.123747	ENSMUSG00000015090	Ptgds	PTGDS
ENSMUSG00000115293.2	29.1373	8.03193	3.0272	2.65325	0.007972	0.124371	ENSMUSG00000115293	Gm49333	GM49333
ENSMUSG00000031760.9	88.5502	1.30439	0.491895	2.65176	0.00800738	0.124822	ENSMUSG00000031760	Mt3	MT3
ENSMUSG00000027318.17	172.014	1.26293	0.476394	2.65103	0.00802474	0.124991	ENSMUSG00000027318	Adam33	ADAM33
ENSMUSG00000038193.4	234.757	1.05577	0.398314	2.6506	0.00803479	0.125046	ENSMUSG00000038193	Hand2	HAND2
ENSMUSG00000032232.14	339.696	0.83516	0.315121	2.65028	0.00804249	0.125065	ENSMUSG00000032232	Cgnl1	CGNL1
ENSMUSG00000044976.17	17.7341	1.74166	0.657299	2.64972	0.00805595	0.125173	ENSMUSG00000044976	Wdr72	WDR72
ENSMUSG00000079105.4	3.13129	3.5526	1.34099	2.64924	0.00806726	0.125248	ENSMUSG00000079105	C7	C7
ENSMUSG00000038349.10	86.7057	0.902846	0.340857	2.64875	0.00807889	0.125327	ENSMUSG00000038349	Plcl1	PLCL1
ENSMUSG00000029669.14	377.05	0.504097	0.190508	2.64607	0.00814335	0.126225	ENSMUSG00000029669	Tspan12	TSPAN12
ENSMUSG00000029233.15	531.515	-0.379154	0.143326	-2.64541	0.0081593	0.126324	ENSMUSG00000029233	Srd5a3	SRD5A3
ENSMUSG00000032607.12	451.455	0.47283	0.178762	2.64502	0.00816849	0.126324	ENSMUSG00000032607	Amt	AMT
ENSMUSG00000028039.11	5.91369	2.64239	0.999018	2.64499	0.00816943	0.126324	ENSMUSG00000028039	Efna3	EFNA3
ENSMUSG00000028830.14	1976.42	-0.389662	0.147375	-2.64402	0.00819284	0.126584	ENSMUSG00000028830	AU040320	AU040320
ENSMUSG00000057777.4	49.5595	1.72608	0.653141	2.64273	0.00822403	0.126881	ENSMUSG00000057777	Mab21l2	MAB21L2
ENSMUSG00000073856.11	68.655	0.657238	0.248701	2.64268	0.00822524	0.126881	ENSMUSG00000073856	Iqck	IQCK
ENSMUSG00000097908.7	224.344	-0.531774	0.201345	-2.64112	0.00826334	0.127325	ENSMUSG00000097908	4933404O12Rik	4933404O12RIK
ENSMUSG00000028789.16	336.396	0.466651	0.176698	2.64095	0.00826729	0.127325	ENSMUSG00000028789	Azin2	AZIN2
ENSMUSG00000023460.13	1276.66	0.442654	0.167644	2.64044	0.00827978	0.127383	ENSMUSG00000023460	Rab12	RAB12
ENSMUSG00000093954.8	3.52995	4.50359	1.70585	2.64008	0.00828862	0.127383	ENSMUSG00000093954	Gm16867	GM16867
ENSMUSG00000067786.16	778.296	-0.866226	0.328121	-2.63996	0.00829154	0.127383	ENSMUSG00000067786	Nnat	NNAT
ENSMUSG00000060733.13	1076.82	-0.380854	0.144292	-2.63947	0.00830367	0.127383	ENSMUSG00000060733	Ipmk	IPMK
ENSMUSG00000034591.5	352.098	0.46668	0.17681	2.63945	0.00830414	0.127383	ENSMUSG00000034591	Slc41a2	SLC41A2
ENSMUSG00000042707.6	9.23716	1.54098	0.584441	2.63668	0.00837228	0.128326	ENSMUSG00000042707	Dnali1	DNALI1
ENSMUSG00000019854.17	963.924	-0.380805	0.144475	-2.63579	0.00839415	0.128486	ENSMUSG00000019854	Reps1	REPS1
ENSMUSG00000047658.6	6.77831	2.35738	0.894398	2.63571	0.00839607	0.128486	ENSMUSG00000047658	Gal3st3	GAL3ST3
ENSMUSG00000054723.6	2078.33	-0.362043	0.137412	-2.63473	0.0084205	0.128757	ENSMUSG00000054723	Vmac	VMAC
ENSMUSG00000055197.4	256.971	0.723349	0.274775	2.63251	0.00847554	0.129496	ENSMUSG00000055197	Fev	FEV
ENSMUSG00000022324.15	1428.9	0.785255	0.298451	2.63111	0.00851075	0.129931	ENSMUSG00000022324	Matn2	MATN2
ENSMUSG00000074934.3	28.9871	2.5014	0.951171	2.62981	0.00854328	0.130324	ENSMUSG00000074934	Grem1	GREM1
ENSMUSG00000064080.12	852.674	1.12535	0.428003	2.62929	0.00855625	0.130418	ENSMUSG00000064080	Fbln2	FBLN2
ENSMUSG00000049690.15	40.9179	-1.07646	0.409519	-2.6286	0.00857361	0.13058	ENSMUSG00000049690	Nckap5	NCKAP5
ENSMUSG00000108308.1	40.1469	-0.966623	0.367894	-2.62745	0.00860285	0.130867	ENSMUSG00000108308	Gm45218	GM45218
ENSMUSG00000102752.1	82.9528	0.868246	0.330477	2.62725	0.00860776	0.130867	ENSMUSG00000102752	Gm7694	GM7694
ENSMUSG00000041235.12	1743.5	-0.517211	0.196879	-2.62705	0.00861289	0.130867	ENSMUSG00000041235	Chd7	CHD7
ENSMUSG00000035000.8	1173.43	-0.726451	0.276634	-2.62604	0.00863855	0.131153	ENSMUSG00000035000	Dpp4	DPP4
ENSMUSG00000042961.13	215.821	0.70193	0.267341	2.62559	0.00864979	0.13117	ENSMUSG00000042961	Egflam	EGFLAM
ENSMUSG00000034210.14	1383.34	-0.415804	0.158377	-2.62541	0.00865442	0.13117	ENSMUSG00000034210	Efcab14	EFCAB14
ENSMUSG00000047735.14	494.266	0.672888	0.25632	2.62519	0.0086601	0.13117	ENSMUSG00000047735	Samd9l	SAMD9L
ENSMUSG00000025887.10	149.041	0.931385	0.354851	2.62472	0.00867201	0.131219	ENSMUSG00000025887	Casp12	CASP12
ENSMUSG00000104445.1	5.81926	-2.33929	0.891318	-2.62453	0.00867697	0.131219	ENSMUSG00000104445	Rhbg	RHBG
ENSMUSG00000045008.2	83.8259	-0.659933	0.251514	-2.62384	0.00869454	0.131381	ENSMUSG00000045008	9030612E09Rik	9030612E09RIK
ENSMUSG00000030909.6	841.305	-0.478263	0.182344	-2.62287	0.00871932	0.131652	ENSMUSG00000030909	Anks4b	ANKS4B
ENSMUSG00000005667.8	1065.54	-0.479786	0.182965	-2.62229	0.00873422	0.131743	ENSMUSG00000005667	Mthfd2	MTHFD2
ENSMUSG00000027257.13	176.997	0.745406	0.284303	2.62187	0.00874489	0.131743	ENSMUSG00000027257	Pacsin3	PACSIN3
ENSMUSG00000040875.12	194.826	-0.530169	0.202263	-2.62119	0.00876226	0.131765	ENSMUSG00000040875	Osbpl10	OSBPL10
ENSMUSG00000036061.10	416.966	-0.504742	0.192569	-2.62109	0.00876479	0.131765	ENSMUSG00000036061	Smug1	SMUG1
ENSMUSG00000038732.15	152.393	1.17499	0.448304	2.62097	0.00876791	0.131765	ENSMUSG00000038732	Mboat1	MBOAT1
ENSMUSG00000035298.8	23.0383	1.29563	0.49488	2.61806	0.008843	0.13279	ENSMUSG00000035298	Klhl35	KLHL35
ENSMUSG00000086022.1	75.4936	-0.768742	0.293757	-2.61693	0.00887247	0.133129	ENSMUSG00000086022	Rad51ap2	RAD51AP2
ENSMUSG00000041199.3	741.999	-0.418128	0.159826	-2.61614	0.00889294	0.133324	ENSMUSG00000041199	Rpusd1	RPUSD1
ENSMUSG00000034460.9	538.686	-0.752208	0.287553	-2.6159	0.00889935	0.133324	ENSMUSG00000034460	Six4	SIX4
ENSMUSG00000022840.9	179.736	1.02359	0.3914	2.6152	0.00891756	0.13346	ENSMUSG00000022840	Adcy5	ADCY5
ENSMUSG00000011305.11	6.83127	2.07233	0.792509	2.6149	0.00892533	0.13346	ENSMUSG00000011305	Plin5	PLIN5
ENSMUSG00000006411.12	127.161	0.80323	0.307192	2.61475	0.00892925	0.13346	ENSMUSG00000006411	Nectin4	NECTIN4
ENSMUSG00000050520.4	163.022	0.975707	0.373516	2.61223	0.00899546	0.134208	ENSMUSG00000050520	Cldn8	CLDN8
ENSMUSG00000024480.9	1122.83	-0.527352	0.201908	-2.61184	0.00900551	0.134208	ENSMUSG00000024480	Ap3s1	AP3S1
ENSMUSG00000017718.15	93.4163	0.616766	0.236158	2.61167	0.00901008	0.134208	ENSMUSG00000017718	Afmid	AFMID
ENSMUSG00000026520.8	4849.48	-0.594703	0.227719	-2.61156	0.00901297	0.134208	ENSMUSG00000026520	Pycr2	PYCR2
ENSMUSG00000014867.9	11905.8	-0.302424	0.115804	-2.61152	0.00901416	0.134208	ENSMUSG00000014867	Surf4	SURF4
ENSMUSG00000074218.3	58.6865	-1.80128	0.689996	-2.61057	0.00903909	0.134317	ENSMUSG00000074218	Cox7a1	COX7A1
ENSMUSG00000030125.11	46.4892	0.795333	0.30466	2.61056	0.00903945	0.134317	ENSMUSG00000030125	Lrrc23	LRRC23
ENSMUSG00000042298.18	449.965	-0.334416	0.128107	-2.61045	0.00904244	0.134317	ENSMUSG00000042298	Ttc19	TTC19
ENSMUSG00000032531.15	628.402	0.565426	0.216642	2.60996	0.00905533	0.134405	ENSMUSG00000032531	Amotl2	AMOTL2
ENSMUSG00000030283.7	221.146	-0.806334	0.309066	-2.60894	0.00908242	0.134703	ENSMUSG00000030283	St8sia1	ST8SIA1
ENSMUSG00000091956.2	4491.57	-0.684708	0.262515	-2.60827	0.0091002	0.134862	ENSMUSG00000091956	C2cd4b	C2CD4B
ENSMUSG00000069833.13	1842.72	0.8884	0.340686	2.60768	0.00911585	0.13499	ENSMUSG00000069833	Ahnak	AHNAK
ENSMUSG00000054013.6	263.937	1.13077	0.433722	2.60712	0.00913064	0.135075	ENSMUSG00000054013	Tmem179	TMEM179
ENSMUSG00000038860.15	143.429	0.903957	0.346751	2.60694	0.00913562	0.135075	ENSMUSG00000038860	Garnl3	GARNL3
ENSMUSG00000031383.8	6.71195	2.20196	0.844979	2.60593	0.00916242	0.135343	ENSMUSG00000031383	Dusp9	DUSP9
ENSMUSG00000030409.16	1158.93	0.455923	0.174979	2.60559	0.00917162	0.135343	ENSMUSG00000030409	Dmpk	DMPK
ENSMUSG00000072653.14	230.869	0.453116	0.17391	2.60547	0.00917487	0.135343	ENSMUSG00000072653	Zfp783	ZFP783
ENSMUSG00000049946.7	3.51956	2.79642	1.07397	2.60382	0.00921919	0.135893	ENSMUSG00000049946	BC030500	BC030500
ENSMUSG00000026509.15	1624.44	0.38587	0.148231	2.60316	0.00923696	0.136004	ENSMUSG00000026509	Capn2	CAPN2
ENSMUSG00000028931.12	367.587	0.906578	0.34828	2.60301	0.00924084	0.136004	ENSMUSG00000028931	Kcnab2	KCNAB2
ENSMUSG00000074364.6	644.944	0.718029	0.275917	2.60234	0.00925912	0.136168	ENSMUSG00000074364	Ehd2	EHD2
ENSMUSG00000027298.17	168.319	0.693195	0.266506	2.60104	0.00929403	0.136486	ENSMUSG00000027298	Tyro3	TYRO3
ENSMUSG00000032702.16	843.603	0.517991	0.19915	2.60101	0.00929492	0.136486	ENSMUSG00000032702	Kank1	KANK1
ENSMUSG00000056222.15	688.251	0.706664	0.271762	2.6003	0.00931412	0.136577	ENSMUSG00000056222	Spock1	SPOCK1
ENSMUSG00000104625.1	32.1283	-0.918449	0.353214	-2.60026	0.00931532	0.136577	ENSMUSG00000104625	Gm42448	GM42448
ENSMUSG00000085715.2	5.52535	1.99012	0.765479	2.59983	0.00932691	0.136637	ENSMUSG00000085715	Tsix	TSIX
ENSMUSG00000034839.5	25.4844	1.53598	0.590855	2.59959	0.00933359	0.136637	ENSMUSG00000034839	Larp6	LARP6
ENSMUSG00000033949.12	32.2163	1.11835	0.430271	2.59918	0.0093447	0.136695	ENSMUSG00000033949	Trim36	TRIM36
ENSMUSG00000046589.7	37.8279	1.09141	0.420233	2.59717	0.00939961	0.137394	ENSMUSG00000046589	Lrrc8e	LRRC8E
ENSMUSG00000040829.14	64.1448	1.48383	0.571394	2.59686	0.00940794	0.137412	ENSMUSG00000040829	Zmynd15	ZMYND15
ENSMUSG00000068328.9	1511.85	-0.462732	0.178226	-2.59632	0.00942292	0.137526	ENSMUSG00000068328	Aup1	AUP1
ENSMUSG00000003573.15	99.817	0.620634	0.239132	2.59536	0.00944912	0.137804	ENSMUSG00000003573	Homer3	HOMER3
ENSMUSG00000011589.9	28.6934	1.40269	0.540634	2.59453	0.00947192	0.138032	ENSMUSG00000011589	Fsd1	FSD1
ENSMUSG00000031441.15	1678.55	0.447889	0.172734	2.59294	0.0095158	0.138566	ENSMUSG00000031441	Atp11a	ATP11A
ENSMUSG00000117048.1	93.9783	-0.657579	0.253655	-2.59241	0.00953054	0.138676	ENSMUSG00000117048	Gm41584	GM41584
ENSMUSG00000027357.16	463.461	-0.574407	0.221648	-2.59153	0.00955507	0.138928	ENSMUSG00000027357	Crls1	CRLS1
ENSMUSG00000018677.9	5122.67	-0.46158	0.178175	-2.5906	0.00958079	0.139119	ENSMUSG00000018677	Slc25a39	SLC25A39
ENSMUSG00000040860.16	1483.13	-0.440457	0.170025	-2.59054	0.00958267	0.139119	ENSMUSG00000040860	Crocc	CROCC
ENSMUSG00000027276.7	170.693	0.765954	0.295724	2.59009	0.00959496	0.139192	ENSMUSG00000027276	Jag1	JAG1
ENSMUSG00000056260.15	686.272	-0.383316	0.148018	-2.58966	0.00960704	0.139262	ENSMUSG00000056260	Lrif1	LRIF1
ENSMUSG00000024935.11	24.7608	1.07013	0.413459	2.58825	0.00964662	0.139694	ENSMUSG00000024935	Slc1a1	SLC1A1
ENSMUSG00000047507.12	5093.24	-0.44086	0.170352	-2.58794	0.00965513	0.139694	ENSMUSG00000047507	Baiap3	BAIAP3
ENSMUSG00000044748.8	854.57	-0.75214	0.290684	-2.58748	0.00966809	0.139694	ENSMUSG00000044748	Defb1	DEFB1
ENSMUSG00000080115.3	197.401	-0.521346	0.201496	-2.58738	0.00967101	0.139694	ENSMUSG00000080115	Eef1akmt3	EEF1AKMT3
ENSMUSG00000030104.9	3094.38	-0.614707	0.237586	-2.5873	0.00967311	0.139694	ENSMUSG00000030104	Edem1	EDEM1
ENSMUSG00000029432.12	1388.29	-0.477453	0.18462	-2.58613	0.0097059	0.140062	ENSMUSG00000029432	Nipsnap2	NIPSNAP2
ENSMUSG00000068115.13	92.9291	0.930128	0.359759	2.58542	0.00972603	0.140247	ENSMUSG00000068115	Ninl	NINL
ENSMUSG00000036087.18	1296.46	-0.437436	0.169372	-2.58269	0.0098033	0.141256	ENSMUSG00000036087	Slain2	SLAIN2
ENSMUSG00000003348.10	655.567	0.611745	0.236965	2.58158	0.00983487	0.141605	ENSMUSG00000003348	Mob3a	MOB3A
ENSMUSG00000056966.7	20.7757	1.28206	0.49673	2.58101	0.00985125	0.141734	ENSMUSG00000056966	Gjc3	GJC3
ENSMUSG00000030905.5	48.9687	0.988564	0.383089	2.58051	0.00986546	0.141833	ENSMUSG00000030905	Crym	CRYM
ENSMUSG00000021213.12	989.194	-0.717501	0.278341	-2.57778	0.00994387	0.142853	ENSMUSG00000021213	Akr1c13	AKR1C13
ENSMUSG00000046321.8	21.3141	1.64482	0.638946	2.57427	0.0100452	0.144201	ENSMUSG00000046321	Hs3st2	HS3ST2
ENSMUSG00000020140.15	16.328	1.20895	0.46977	2.57349	0.010068	0.14442	ENSMUSG00000020140	Lgr5	LGR5
ENSMUSG00000047787.8	448.46	-0.449766	0.174878	-2.57189	0.0101145	0.14498	ENSMUSG00000047787	Flrt1	FLRT1
ENSMUSG00000022225.7	4.27491	4.01566	1.56168	2.57138	0.0101295	0.145	ENSMUSG00000022225	Cma1	CMA1
ENSMUSG00000020794.13	795.948	-0.343728	0.133677	-2.57133	0.010131	0.145	ENSMUSG00000020794	Ube2g1	UBE2G1
ENSMUSG00000038984.4	183.213	0.482169	0.18756	2.57074	0.0101481	0.145137	ENSMUSG00000038984	Tspyl5	TSPYL5
ENSMUSG00000029032.12	2098.85	-0.340841	0.132625	-2.56996	0.010171	0.145219	ENSMUSG00000029032	Arhgef16	ARHGEF16
ENSMUSG00000015016.8	882.162	-0.384657	0.149678	-2.5699	0.0101728	0.145219	ENSMUSG00000015016	Acsf3	ACSF3
ENSMUSG00000066878.5	3.11843	4.80605	1.87022	2.56977	0.0101765	0.145219	ENSMUSG00000066878	Gm10184	GM10184
ENSMUSG00000049625.6	58.082	0.989051	0.385072	2.56849	0.0102144	0.145652	ENSMUSG00000049625	Tifab	TIFAB
ENSMUSG00000027808.8	9219.71	-0.569866	0.221891	-2.56823	0.010222	0.145653	ENSMUSG00000027808	Serp1	SERP1
ENSMUSG00000021417.15	2302.94	0.378958	0.147621	2.5671	0.0102552	0.146017	ENSMUSG00000021417	Eci2	ECI2
ENSMUSG00000026961.6	101.858	1.26619	0.493365	2.56644	0.0102749	0.14619	ENSMUSG00000026961	Lrrc26	LRRC26
ENSMUSG00000049577.15	519.418	0.689888	0.268867	2.56591	0.0102905	0.146303	ENSMUSG00000049577	Zfpm1	ZFPM1
ENSMUSG00000061048.8	73.9074	1.44619	0.563707	2.5655	0.0103026	0.146367	ENSMUSG00000061048	Cdh3	CDH3
ENSMUSG00000046159.16	832.052	-0.439427	0.171389	-2.56392	0.0103498	0.146846	ENSMUSG00000046159	Chrm3	CHRM3
ENSMUSG00000054679.8	41.9057	1.28133	0.499766	2.56386	0.0103516	0.146846	ENSMUSG00000054679	Srsf12	SRSF12
ENSMUSG00000035615.12	43.4684	1.37102	0.534871	2.56328	0.0103689	0.146984	ENSMUSG00000035615	Frmpd1	FRMPD1
ENSMUSG00000028226.15	56.0575	0.88038	0.343627	2.56202	0.0104065	0.147383	ENSMUSG00000028226	Mmp16	MMP16
ENSMUSG00000074715.3	275.345	-1.01194	0.395007	-2.56182	0.0104125	0.147383	ENSMUSG00000074715	Ccl28	CCL28
ENSMUSG00000039246.8	568.337	-0.487729	0.190485	-2.56045	0.0104536	0.147857	ENSMUSG00000039246	Lyplal1	LYPLAL1
ENSMUSG00000070867.4	76.7372	0.664917	0.259721	2.56012	0.0104637	0.147891	ENSMUSG00000070867	Trabd2b	TRABD2B
ENSMUSG00000030351.5	4.99497	2.93165	1.14573	2.55876	0.0105046	0.148361	ENSMUSG00000030351	Tspan11	TSPAN11
ENSMUSG00000040035.14	11751.7	-0.458897	0.179386	-2.55816	0.0105228	0.148451	ENSMUSG00000040035	Disp2	DISP2
ENSMUSG00000078317.6	858.458	-0.426291	0.166648	-2.55804	0.0105265	0.148451	ENSMUSG00000078317	F8a	F8A
ENSMUSG00000030095.10	686.214	0.368961	0.144375	2.55557	0.0106014	0.1493	ENSMUSG00000030095	Tmem43	TMEM43
ENSMUSG00000041566.3	20.1521	-1.16745	0.456833	-2.55553	0.0106027	0.1493	ENSMUSG00000041566	Tssk1	TSSK1
ENSMUSG00000006764.8	111.321	-1.04514	0.40901	-2.55529	0.0106099	0.1493	ENSMUSG00000006764	Tph2	TPH2
ENSMUSG00000029027.9	209.402	-0.514	0.201219	-2.55443	0.0106363	0.149561	ENSMUSG00000029027	Dffb	DFFB
ENSMUSG00000019893.13	7.14246	-2.0291	0.794555	-2.55376	0.0106567	0.149738	ENSMUSG00000019893	Ros1	ROS1
ENSMUSG00000009563.16	928.012	-0.377102	0.147715	-2.55291	0.0106826	0.149993	ENSMUSG00000009563	Tor2a	TOR2A
ENSMUSG00000038552.14	53.0984	1.03763	0.406796	2.55073	0.0107497	0.150715	ENSMUSG00000038552	Fndc4	FNDC4
ENSMUSG00000089706.7	46.0882	0.783613	0.307317	2.54985	0.010777	0.150987	ENSMUSG00000089706	B230216N24Rik	B230216N24RIK
ENSMUSG00000023906.3	548.984	0.675756	0.265144	2.54863	0.0108146	0.151277	ENSMUSG00000023906	Cldn6	CLDN6
ENSMUSG00000029544.16	611.167	-0.588396	0.230879	-2.5485	0.0108188	0.151277	ENSMUSG00000029544	Cabp1	CABP1
ENSMUSG00000097785.2	31.4052	0.820368	0.321913	2.54842	0.0108212	0.151277	ENSMUSG00000097785	B230217O12Rik	B230217O12RIK
ENSMUSG00000031298.15	13.5463	1.25084	0.491161	2.5467	0.0108746	0.151912	ENSMUSG00000031298	Adgrg2	ADGRG2
ENSMUSG00000018900.7	381.787	0.38577	0.15158	2.545	0.0109279	0.152364	ENSMUSG00000018900	Slc22a5	SLC22A5
ENSMUSG00000023353.14	2319.77	0.323812	0.127244	2.54481	0.0109337	0.152364	ENSMUSG00000023353	Agap3	AGAP3
ENSMUSG00000039220.16	2154.67	-0.383687	0.15078	-2.54468	0.0109378	0.152364	ENSMUSG00000039220	Ppp1r10	PPP1R10
ENSMUSG00000019828.13	12.7686	-1.58835	0.624193	-2.54465	0.0109386	0.152364	ENSMUSG00000019828	Grm1	GRM1
ENSMUSG00000096935.5	115.324	-0.63678	0.250297	-2.54409	0.0109562	0.152499	ENSMUSG00000096935	1700113A16Rik	1700113A16RIK
ENSMUSG00000037610.15	1356.91	-0.614381	0.241582	-2.54315	0.0109857	0.152799	ENSMUSG00000037610	Kcnmb2	KCNMB2
ENSMUSG00000002108.10	398.894	-0.592772	0.233142	-2.54253	0.0110052	0.152896	ENSMUSG00000002108	Nr1h3	NR1H3
ENSMUSG00000055862.7	339.376	0.718883	0.28279	2.54211	0.0110187	0.152896	ENSMUSG00000055862	Izumo4	IZUMO4
ENSMUSG00000030083.11	706.806	-0.373313	0.146858	-2.542	0.0110222	0.152896	ENSMUSG00000030083	Abtb1	ABTB1
ENSMUSG00000064293.14	8.05614	1.48718	0.585062	2.54192	0.0110244	0.152896	ENSMUSG00000064293	Cntn4	CNTN4
ENSMUSG00000040078.9	23.0158	7.69161	3.02748	2.5406	0.0110662	0.153364	ENSMUSG00000040078	Ptges3-ps	PTGES3-PS
ENSMUSG00000072949.6	96.4391	0.905444	0.356453	2.54015	0.0110804	0.153372	ENSMUSG00000072949	Acot1	ACOT1
ENSMUSG00000051065.9	300.168	0.481791	0.189682	2.53999	0.0110855	0.153372	ENSMUSG00000051065	Mb21d2	MB21D2
ENSMUSG00000015966.17	10.7767	1.43405	0.564624	2.53983	0.0110907	0.153372	ENSMUSG00000015966	Il17rb	IL17RB
ENSMUSG00000052397.8	1416.64	0.618335	0.243615	2.53816	0.0111438	0.153995	ENSMUSG00000052397	Ezr	EZR
ENSMUSG00000030871.11	459.955	-0.349733	0.137823	-2.53755	0.0111631	0.154099	ENSMUSG00000030871	Ears2	EARS2
ENSMUSG00000107363.1	3.068	-3.45987	1.36354	-2.53742	0.0111673	0.154099	ENSMUSG00000107363	Gm43373	GM43373
ENSMUSG00000059602.14	25.2341	1.19329	0.470364	2.53696	0.0111821	0.154192	ENSMUSG00000059602	Syn3	SYN3
ENSMUSG00000019487.11	300.288	0.569601	0.224648	2.53553	0.0112278	0.154712	ENSMUSG00000019487	Trip10	TRIP10
ENSMUSG00000110221.1	4.55981	-1.81198	0.71509	-2.53391	0.0112797	0.155315	ENSMUSG00000110221	Gm36210	GM36210
ENSMUSG00000076587.3	14.3133	-2.88422	1.13854	-2.53327	0.0113005	0.155491	ENSMUSG00000076587	Igkv6-20	IGKV6-20
ENSMUSG00000053094.15	4227.74	-0.297296	0.117381	-2.53274	0.0113174	0.155584	ENSMUSG00000053094	Tmem248	TMEM248
ENSMUSG00000022885.16	2401.94	0.442456	0.174707	2.53256	0.0113234	0.155584	ENSMUSG00000022885	St6gal1	ST6GAL1
ENSMUSG00000071369.11	871.066	0.429603	0.169694	2.53163	0.0113535	0.155885	ENSMUSG00000071369	Map3k5	MAP3K5
ENSMUSG00000060862.10	787.228	-0.595453	0.235247	-2.53118	0.0113679	0.155972	ENSMUSG00000060862	Zbtb40	ZBTB40
ENSMUSG00000022952.17	91.0124	1.01627	0.401715	2.52982	0.0114122	0.156466	ENSMUSG00000022952	Runx1	RUNX1
ENSMUSG00000021901.10	1541.17	-0.306096	0.121007	-2.52957	0.0114202	0.156466	ENSMUSG00000021901	Bap1	BAP1
ENSMUSG00000031513.8	1500.67	-0.35824	0.141668	-2.52873	0.0114476	0.156683	ENSMUSG00000031513	Leprotl1	LEPROTL1
ENSMUSG00000100084.2	52.2173	-0.77256	0.30553	-2.52859	0.0114523	0.156683	ENSMUSG00000100084	2310068J16Rik	2310068J16RIK
ENSMUSG00000037470.14	6027.69	-0.376627	0.149036	-2.52709	0.0115012	0.157139	ENSMUSG00000037470	Uggt1	UGGT1
ENSMUSG00000033114.11	79.1466	-0.776095	0.307113	-2.52707	0.011502	0.157139	ENSMUSG00000033114	Slc35d2	SLC35D2
ENSMUSG00000029390.13	6981.52	-0.395051	0.156425	-2.5255	0.0115533	0.157728	ENSMUSG00000029390	Tmed2	TMED2
ENSMUSG00000034667.8	1667.05	-0.414263	0.164057	-2.52511	0.0115661	0.157766	ENSMUSG00000034667	Xpot	XPOT
ENSMUSG00000021363.14	11.5467	1.37669	0.545333	2.52449	0.0115867	0.157832	ENSMUSG00000021363	Mak	MAK
ENSMUSG00000024663.20	112.612	0.691527	0.273951	2.52428	0.0115937	0.157832	ENSMUSG00000024663	Rab3il1	RAB3IL1
ENSMUSG00000028776.14	450.953	0.674088	0.267105	2.52368	0.0116133	0.157987	ENSMUSG00000028776	Tinagl1	TINAGL1
ENSMUSG00000046329.14	1041.99	-0.443032	0.175655	-2.52217	0.0116634	0.158556	ENSMUSG00000046329	Slc25a23	SLC25A23
ENSMUSG00000032452.12	44.4286	0.765534	0.303608	2.52146	0.011687	0.158708	ENSMUSG00000032452	Clstn2	CLSTN2
ENSMUSG00000038224.12	10.5943	-1.56695	0.621478	-2.52134	0.011691	0.158708	ENSMUSG00000038224	Serpinf2	SERPINF2
ENSMUSG00000096210.2	3981.84	-0.420047	0.16669	-2.51992	0.011738	0.159208	ENSMUSG00000096210	H1f0	H1F0
ENSMUSG00000108391.1	15.5383	-1.26768	0.503146	-2.51951	0.0117518	0.159208	ENSMUSG00000108391	Gm9768	GM9768
ENSMUSG00000047554.14	1040.18	-0.338018	0.134162	-2.51948	0.0117527	0.159208	ENSMUSG00000047554	Tmem41b	TMEM41B
ENSMUSG00000098973.1	8.5223	-1.91384	0.759852	-2.51871	0.0117786	0.159447	ENSMUSG00000098973	Mir6236	MIR6236
ENSMUSG00000097060.1	23.3815	-1.14185	0.453932	-2.51546	0.0118878	0.160811	ENSMUSG00000097060	Gm26759	GM26759
ENSMUSG00000114282.1	59.1649	-0.774047	0.30777	-2.51502	0.0119027	0.160882	ENSMUSG00000114282	5330431K02Rik	5330431K02RIK
ENSMUSG00000104705.1	4.76041	2.01615	0.80171	2.51481	0.0119097	0.160882	ENSMUSG00000104705	4930405N21Rik	4930405N21RIK
ENSMUSG00000029428.13	354.64	0.34079	0.135534	2.51442	0.0119227	0.160944	ENSMUSG00000029428	Stx2	STX2
ENSMUSG00000029832.16	46.7273	1.37347	0.546413	2.51361	0.0119502	0.161202	ENSMUSG00000029832	Nfe2l3	NFE2L3
ENSMUSG00000075027.10	6.79164	2.21905	0.88308	2.51285	0.0119759	0.161435	ENSMUSG00000075027	4631405J19Rik	4631405J19RIK
ENSMUSG00000045498.1	13.5504	1.21946	0.485423	2.51215	0.0119998	0.161645	ENSMUSG00000045498	Pcdhb3	PCDHB3
ENSMUSG00000030075.10	79.6041	0.640152	0.254878	2.51161	0.0120183	0.161651	ENSMUSG00000030075	Cntn3	CNTN3
ENSMUSG00000020656.16	288.29	-1.05292	0.419244	-2.51148	0.0120226	0.161651	ENSMUSG00000020656	Grhl1	GRHL1
ENSMUSG00000057069.7	36806.3	-0.348724	0.138859	-2.51136	0.0120267	0.161651	ENSMUSG00000057069	Ero1lb	ERO1LB
ENSMUSG00000100277.8	36.1899	-1.71369	0.682448	-2.51109	0.0120359	0.161651	ENSMUSG00000100277	1810053B23Rik	1810053B23RIK
ENSMUSG00000036867.7	112.322	0.443507	0.176632	2.5109	0.0120423	0.161651	ENSMUSG00000036867	Smad6	SMAD6
ENSMUSG00000030980.17	1100.38	-0.557353	0.222046	-2.51008	0.0120704	0.161915	ENSMUSG00000030980	Knop1	KNOP1
ENSMUSG00000045136.6	453.831	1.20557	0.48038	2.50962	0.0120862	0.16193	ENSMUSG00000045136	Tubb2b	TUBB2B
ENSMUSG00000060639.5	305.22	-0.543658	0.216635	-2.50955	0.0120884	0.16193	ENSMUSG00000060639	H4c9	H4C9
ENSMUSG00000019818.15	17240.4	-0.380764	0.151762	-2.50896	0.0121087	0.161977	ENSMUSG00000019818	Cd164	CD164
ENSMUSG00000020654.15	244.223	0.487346	0.194265	2.50867	0.0121188	0.161999	ENSMUSG00000020654	Adcy3	ADCY3
ENSMUSG00000031740.8	133.278	1.23833	0.493698	2.50828	0.0121321	0.162065	ENSMUSG00000031740	Mmp2	MMP2
ENSMUSG00000118257.1	4.27887	3.00164	1.19698	2.50767	0.0121531	0.162232	ENSMUSG00000118257	9630014M24Rik	9630014M24RIK
ENSMUSG00000110027.1	41.4715	-0.938366	0.374348	-2.50667	0.0121876	0.16258	ENSMUSG00000110027	C030029H02Rik	C030029H02RIK
ENSMUSG00000055926.3	4.35893	2.99424	1.19503	2.50557	0.0122253	0.162829	ENSMUSG00000055926	Gm14137	GM14137
ENSMUSG00000017491.9	25.848	0.969152	0.386911	2.50484	0.0122506	0.162829	ENSMUSG00000017491	Rarb	RARB
ENSMUSG00000030281.16	776.375	0.454892	0.181629	2.50452	0.0122619	0.162829	ENSMUSG00000030281	Il17rc	IL17RC
ENSMUSG00000049115.15	71.5503	0.755588	0.301704	2.5044	0.012266	0.162829	ENSMUSG00000049115	Agtr1a	AGTR1A
ENSMUSG00000022057.8	18.5039	2.59482	1.03622	2.50411	0.0122759	0.162829	ENSMUSG00000022057	Adamdec1	ADAMDEC1
ENSMUSG00000074282.10	136.559	-0.564643	0.225489	-2.50408	0.012277	0.162829	ENSMUSG00000074282	Zfp94	ZFP94
ENSMUSG00000118210.1	55.8306	-0.722833	0.288678	-2.50394	0.0122818	0.162829	ENSMUSG00000118210	Gm50394	GM50394
ENSMUSG00000032757.6	1170.94	-0.510488	0.203875	-2.50392	0.0122824	0.162829	ENSMUSG00000032757	Bet1	BET1
ENSMUSG00000017723.11	154.977	1.52649	0.60985	2.50306	0.0123126	0.163116	ENSMUSG00000017723	Wfdc2	WFDC2
ENSMUSG00000032714.6	135.936	0.598608	0.239217	2.50236	0.0123367	0.163323	ENSMUSG00000032714	Syde1	SYDE1
ENSMUSG00000029207.16	516.843	-0.450678	0.180193	-2.50108	0.0123816	0.163805	ENSMUSG00000029207	Apbb2	APBB2
ENSMUSG00000020932.14	40.5702	1.30626	0.522439	2.50031	0.0124086	0.164024	ENSMUSG00000020932	Gfap	GFAP
ENSMUSG00000057060.8	9.19417	1.47576	0.590275	2.50012	0.0124152	0.164024	ENSMUSG00000057060	Slc35f3	SLC35F3
ENSMUSG00000041014.17	12.6607	1.51354	0.605974	2.4977	0.0125003	0.164974	ENSMUSG00000041014	Nrg3	NRG3
ENSMUSG00000040249.15	1392.98	0.633993	0.25385	2.49751	0.0125067	0.164974	ENSMUSG00000040249	Lrp1	LRP1
ENSMUSG00000035653.16	10.5717	1.75383	0.70228	2.49734	0.0125128	0.164974	ENSMUSG00000035653	Lrfn5	LRFN5
ENSMUSG00000037815.7	3132.77	0.360218	0.144304	2.49625	0.0125515	0.16537	ENSMUSG00000037815	Ctnna1	CTNNA1
ENSMUSG00000115099.1	8.50953	1.97118	0.789835	2.49569	0.0125713	0.165517	ENSMUSG00000115099	1700087I21Rik	1700087I21RIK
ENSMUSG00000025372.16	818.89	-0.471128	0.188814	-2.49519	0.0125888	0.165635	ENSMUSG00000025372	Baiap2	BAIAP2
ENSMUSG00000043831.12	306.678	0.418791	0.167907	2.49418	0.0126247	0.165994	ENSMUSG00000043831	Lysmd4	LYSMD4
ENSMUSG00000021556.12	799.318	0.480605	0.192719	2.4938	0.0126382	0.166058	ENSMUSG00000021556	Golm1	GOLM1
ENSMUSG00000039982.8	253.633	0.486605	0.19516	2.49336	0.0126541	0.166153	ENSMUSG00000039982	Dtx4	DTX4
ENSMUSG00000018398.18	838.215	0.488014	0.195813	2.49225	0.0126936	0.166558	ENSMUSG00000018398	Septin8	SEPTIN8
ENSMUSG00000051111.16	222.172	0.979249	0.393132	2.49089	0.0127424	0.167085	ENSMUSG00000051111	Sv2c	SV2C
ENSMUSG00000045934.15	441.944	-0.481204	0.193223	-2.4904	0.01276	0.167201	ENSMUSG00000045934	Mtmr11	MTMR11
ENSMUSG00000027883.15	201.266	0.521245	0.209343	2.48991	0.0127777	0.167257	ENSMUSG00000027883	Gpsm2	GPSM2
ENSMUSG00000032503.18	17.2902	1.34174	0.538905	2.48976	0.0127831	0.167257	ENSMUSG00000032503	Arpp21	ARPP21
ENSMUSG00000030772.6	300.717	1.19767	0.481077	2.48955	0.0127903	0.167257	ENSMUSG00000030772	Dkk3	DKK3
ENSMUSG00000085081.1	25.0995	-0.932543	0.374631	-2.48923	0.012802	0.167295	ENSMUSG00000085081	Rptoros	RPTOROS
ENSMUSG00000040663.9	137.327	1.19677	0.480855	2.48884	0.0128162	0.167367	ENSMUSG00000040663	Clcf1	CLCF1
ENSMUSG00000112143.1	8.48118	1.34542	0.540709	2.48824	0.0128376	0.167533	ENSMUSG00000112143	Gm35721	GM35721
ENSMUSG00000050908.12	163.952	0.73654	0.296061	2.4878	0.0128537	0.16763	ENSMUSG00000050908	Tvp23a	TVP23A
ENSMUSG00000042272.17	472.695	0.446278	0.179481	2.48649	0.0129011	0.167981	ENSMUSG00000042272	Sestd1	SESTD1
ENSMUSG00000055912.8	212.347	-0.467748	0.188126	-2.48635	0.0129061	0.167981	ENSMUSG00000055912	Tmem150a	TMEM150A
ENSMUSG00000026655.15	959.901	0.833522	0.335249	2.48628	0.0129088	0.167981	ENSMUSG00000026655	Fam107b	FAM107B
ENSMUSG00000056281.4	23.626	-1.55495	0.62546	-2.48609	0.0129156	0.167981	ENSMUSG00000056281	Olfr1322	OLFR1322
ENSMUSG00000037720.16	1421.92	-0.502401	0.202172	-2.48501	0.0129548	0.168377	ENSMUSG00000037720	Tmem33	TMEM33
ENSMUSG00000044231.3	130.467	0.558792	0.224912	2.48449	0.0129738	0.16851	ENSMUSG00000044231	Nhlrc1	NHLRC1
ENSMUSG00000050315.14	141.454	1.34632	0.542008	2.48395	0.0129935	0.168604	ENSMUSG00000050315	Synpo2	SYNPO2
ENSMUSG00000019789.9	62.3778	0.883194	0.3556	2.48367	0.0130036	0.168604	ENSMUSG00000019789	Hey2	HEY2
ENSMUSG00000037606.18	1163.95	-0.293015	0.117981	-2.48357	0.0130073	0.168604	ENSMUSG00000037606	Osbpl5	OSBPL5
ENSMUSG00000070563.6	3.97559	-2.28312	0.91947	-2.48308	0.0130252	0.168722	ENSMUSG00000070563	Spaca4	SPACA4
ENSMUSG00000026504.17	609.311	-0.541092	0.217985	-2.48224	0.0130559	0.168857	ENSMUSG00000026504	Sdccag8	SDCCAG8
ENSMUSG00000020297.10	549.145	1.22607	0.493988	2.48199	0.0130651	0.168857	ENSMUSG00000020297	Nsg2	NSG2
ENSMUSG00000056598.16	90.6883	0.563658	0.22711	2.48187	0.0130694	0.168857	ENSMUSG00000056598	Drc3	DRC3
ENSMUSG00000040414.8	1007.23	-0.337718	0.136076	-2.48184	0.0130707	0.168857	ENSMUSG00000040414	Slc25a28	SLC25A28
ENSMUSG00000118506.1	67.1564	-0.578723	0.233316	-2.48043	0.0131225	0.169338	ENSMUSG00000118506	1700094D03Rik	1700094D03RIK
ENSMUSG00000027947.11	3812.4	-0.68144	0.274736	-2.48034	0.0131256	0.169338	ENSMUSG00000027947	Il6ra	IL6RA
ENSMUSG00000010086.17	209.211	0.510289	0.205785	2.47971	0.0131488	0.169477	ENSMUSG00000010086	Rnf112	RNF112
ENSMUSG00000048251.15	114.3	1.62279	0.654462	2.47957	0.0131539	0.169477	ENSMUSG00000048251	Bcl11b	BCL11B
ENSMUSG00000005947.11	40.2599	1.53767	0.620241	2.47915	0.0131697	0.169566	ENSMUSG00000005947	Itgae	ITGAE
ENSMUSG00000035165.14	182.952	1.54792	0.624659	2.47801	0.0132116	0.169992	ENSMUSG00000035165	Kcne3	KCNE3
ENSMUSG00000031782.15	965.346	-0.333382	0.134607	-2.47671	0.0132601	0.170442	ENSMUSG00000031782	Coq9	COQ9
ENSMUSG00000064125.14	165.366	0.745205	0.300899	2.47659	0.0132643	0.170442	ENSMUSG00000064125	Prr36	PRR36
ENSMUSG00000030616.16	97.5367	0.703783	0.284263	2.47582	0.013293	0.170697	ENSMUSG00000030616	Sytl2	SYTL2
ENSMUSG00000029484.12	908.063	1.07238	0.433202	2.47547	0.0133063	0.170754	ENSMUSG00000029484	Anxa3	ANXA3
ENSMUSG00000032303.8	238.889	1.31939	0.533061	2.47513	0.0133189	0.170801	ENSMUSG00000032303	Chrna3	CHRNA3
ENSMUSG00000031565.18	818.798	0.476122	0.192403	2.47462	0.0133379	0.170932	ENSMUSG00000031565	Fgfr1	FGFR1
ENSMUSG00000025579.14	7787.9	0.349113	0.141124	2.4738	0.0133684	0.171208	ENSMUSG00000025579	Gaa	GAA
ENSMUSG00000046449.15	36.8125	0.806388	0.326093	2.47287	0.0134032	0.171539	ENSMUSG00000046449	Nexmif	NEXMIF
ENSMUSG00000021301.9	10.4547	1.73311	0.700995	2.47236	0.0134224	0.171576	ENSMUSG00000021301	Hecw1	HECW1
ENSMUSG00000026853.15	450.774	0.340041	0.137539	2.47232	0.0134239	0.171576	ENSMUSG00000026853	Crat	CRAT
ENSMUSG00000114691.1	4.57083	-2.16332	0.875207	-2.47178	0.0134442	0.171625	ENSMUSG00000114691	Gm48438	GM48438
ENSMUSG00000016942.6	97.8139	-0.705081	0.285257	-2.47174	0.0134456	0.171625	ENSMUSG00000016942	Tmprss6	TMPRSS6
ENSMUSG00000020178.6	201.02	0.493814	0.199812	2.47139	0.0134588	0.171681	ENSMUSG00000020178	Adora2a	ADORA2A
ENSMUSG00000043068.6	64.5304	0.934831	0.378335	2.47091	0.0134771	0.171799	ENSMUSG00000043068	Fam89a	FAM89A
ENSMUSG00000020993.9	1048.39	-0.390009	0.157907	-2.46986	0.0135165	0.172188	ENSMUSG00000020993	Trappc6b	TRAPPC6B
ENSMUSG00000057606.14	144.468	1.34463	0.544683	2.46865	0.0135624	0.172658	ENSMUSG00000057606	Colq	COLQ
ENSMUSG00000025478.15	51.4942	1.18007	0.478216	2.46766	0.0136001	0.173023	ENSMUSG00000025478	Dpysl4	DPYSL4
ENSMUSG00000040957.15	219.976	-0.431679	0.175098	-2.46536	0.0136875	0.17402	ENSMUSG00000040957	Cables1	CABLES1
ENSMUSG00000034308.13	211.43	0.532966	0.216208	2.46507	0.0136988	0.174049	ENSMUSG00000034308	Sdr42e1	SDR42E1
ENSMUSG00000030729.17	334.847	0.661582	0.268484	2.46414	0.0137342	0.174383	ENSMUSG00000030729	Pgm2l1	PGM2L1
ENSMUSG00000056656.6	14.2409	1.69602	0.688509	2.46332	0.0137656	0.174567	ENSMUSG00000056656	Apol8	APOL8
ENSMUSG00000074491.9	3.11308	3.70308	1.50338	2.46316	0.0137719	0.174567	ENSMUSG00000074491	Clec4g	CLEC4G
ENSMUSG00000072875.2	1339.58	-0.52902	0.214782	-2.46305	0.0137759	0.174567	ENSMUSG00000072875	Gpr27	GPR27
ENSMUSG00000041552.7	19.7427	1.18203	0.479985	2.46263	0.0137921	0.174658	ENSMUSG00000041552	Ptchd1	PTCHD1
ENSMUSG00000006356.10	1012.29	0.672727	0.273217	2.46224	0.0138071	0.174727	ENSMUSG00000006356	Crip2	CRIP2
ENSMUSG00000075600.3	697.266	-0.517499	0.210193	-2.46202	0.0138157	0.174727	ENSMUSG00000075600	Zc3h3	ZC3H3
ENSMUSG00000032373.15	18.4697	1.09317	0.444301	2.46043	0.013877	0.175315	ENSMUSG00000032373	Car12	CAR12
ENSMUSG00000031987.6	1342.86	-0.310162	0.126065	-2.46034	0.0138805	0.175315	ENSMUSG00000031987	Egln1	EGLN1
ENSMUSG00000028976.10	7080.72	-0.416887	0.169553	-2.45874	0.0139427	0.175895	ENSMUSG00000028976	Slc2a5	SLC2A5
ENSMUSG00000053461.9	13.5586	2.82403	1.14861	2.45865	0.0139461	0.175895	ENSMUSG00000053461	Hhipl2	HHIPL2
ENSMUSG00000081512.1	19.7785	-1.33013	0.541042	-2.45845	0.0139538	0.175895	ENSMUSG00000081512	Gm15821	GM15821
ENSMUSG00000029153.11	3368.86	-0.669676	0.272445	-2.45802	0.0139704	0.175989	ENSMUSG00000029153	Ociad2	OCIAD2
ENSMUSG00000041617.10	17.3577	1.09748	0.446642	2.45719	0.0140028	0.176282	ENSMUSG00000041617	Ccdc74a	CCDC74A
ENSMUSG00000050511.1	13.2302	2.65333	1.08008	2.4566	0.0140259	0.176457	ENSMUSG00000050511	Oprd1	OPRD1
ENSMUSG00000000440.12	151.39	-0.541695	0.220527	-2.45636	0.0140351	0.176457	ENSMUSG00000000440	Pparg	PPARG
ENSMUSG00000093906.5	4.71402	4.1904	1.70695	2.4549	0.0140923	0.177044	ENSMUSG00000093906	Igkv9-129	IGKV9-129
ENSMUSG00000021200.14	80.8881	1.31076	0.533995	2.45462	0.0141033	0.177044	ENSMUSG00000021200	Asb2	ASB2
ENSMUSG00000046312.4	96.5038	0.684109	0.27872	2.45446	0.0141094	0.177044	ENSMUSG00000046312	Myorg	MYORG
ENSMUSG00000034757.15	1117.21	-0.350985	0.143048	-2.45362	0.0141428	0.177347	ENSMUSG00000034757	Tmub2	TMUB2
ENSMUSG00000041889.7	142.522	0.810366	0.330481	2.45208	0.0142035	0.177992	ENSMUSG00000041889	Shisa4	SHISA4
ENSMUSG00000039809.10	492.184	-0.925107	0.37737	-2.45146	0.014228	0.178183	ENSMUSG00000039809	Gabbr2	GABBR2
ENSMUSG00000105850.1	24.8922	-0.902938	0.368489	-2.45038	0.0142706	0.1786	ENSMUSG00000105850	Gm2861	GM2861
ENSMUSG00000090061.9	46.8072	1.22077	0.49836	2.44957	0.0143027	0.178658	ENSMUSG00000090061	Nwd2	NWD2
ENSMUSG00000020092.9	211.832	0.460438	0.187967	2.44956	0.0143031	0.178658	ENSMUSG00000020092	Pald1	PALD1
ENSMUSG00000024503.3	2571.86	-1.22908	0.501979	-2.44847	0.0143464	0.179083	ENSMUSG00000024503	Spink1	SPINK1
ENSMUSG00000020946.13	3429.93	-0.301014	0.123047	-2.44633	0.014432	0.180035	ENSMUSG00000020946	Gosr2	GOSR2
ENSMUSG00000053110.13	272.054	0.468982	0.19177	2.44554	0.0144633	0.180309	ENSMUSG00000053110	Yap1	YAP1
ENSMUSG00000033653.18	956.363	-0.610684	0.249875	-2.44396	0.014527	0.180877	ENSMUSG00000033653	Vps8	VPS8
ENSMUSG00000027438.14	392.64	0.604656	0.24741	2.44394	0.0145277	0.180877	ENSMUSG00000027438	Napb	NAPB
ENSMUSG00000027848.12	174.432	0.767588	0.314218	2.44286	0.0145716	0.181306	ENSMUSG00000027848	Olfml3	OLFML3
ENSMUSG00000044279.15	580.533	-0.403163	0.165095	-2.442	0.014606	0.181616	ENSMUSG00000044279	Crb3	CRB3
ENSMUSG00000038312.10	3775.65	-0.571669	0.234123	-2.44174	0.0146165	0.18163	ENSMUSG00000038312	Edem2	EDEM2
ENSMUSG00000030717.9	2472.49	-1.21264	0.496733	-2.44123	0.0146374	0.181772	ENSMUSG00000030717	Nupr1	NUPR1
ENSMUSG00000043460.7	21.8695	1.19111	0.488245	2.43958	0.0147044	0.182486	ENSMUSG00000043460	Elfn2	ELFN2
ENSMUSG00000020658.10	317.396	0.41208	0.168971	2.43876	0.0147378	0.182783	ENSMUSG00000020658	Efr3b	EFR3B
ENSMUSG00000006567.11	80.1634	0.831171	0.340981	2.43759	0.0147856	0.183087	ENSMUSG00000006567	Atp7b	ATP7B
ENSMUSG00000001768.16	476.157	0.479044	0.19653	2.43751	0.0147889	0.183087	ENSMUSG00000001768	Rin2	RIN2
ENSMUSG00000052631.15	9.53439	2.10354	0.863089	2.43723	0.0148004	0.183087	ENSMUSG00000052631	Sh2d6	SH2D6
ENSMUSG00000021054.6	2067.34	-0.313857	0.128837	-2.43607	0.0148478	0.183555	ENSMUSG00000021054	Sgpp1	SGPP1
ENSMUSG00000030315.15	373.491	0.512968	0.210653	2.43514	0.014886	0.18391	ENSMUSG00000030315	Vgll4	VGLL4
ENSMUSG00000118018.1	4.3169	2.2374	0.919114	2.4343	0.0149205	0.184164	ENSMUSG00000118018	AC156546.1	AC156546.1
ENSMUSG00000028073.15	275.927	0.649283	0.266742	2.43412	0.014928	0.184164	ENSMUSG00000028073	Pear1	PEAR1
ENSMUSG00000022272.17	1320.12	-0.621927	0.255522	-2.43394	0.0149353	0.184164	ENSMUSG00000022272	Myo10	MYO10
ENSMUSG00000024583.3	2286.07	-0.457415	0.187965	-2.43351	0.014953	0.184264	ENSMUSG00000024583	Txnl1	TXNL1
ENSMUSG00000078954.9	72.8052	0.719619	0.295817	2.43265	0.0149887	0.184585	ENSMUSG00000078954	Arhgap8	ARHGAP8
ENSMUSG00000005410.6	386.937	0.720129	0.296065	2.43233	0.0150018	0.184629	ENSMUSG00000005410	Mcm5	MCM5
ENSMUSG00000032349.13	2148.9	-0.339262	0.139702	-2.42846	0.0151629	0.186358	ENSMUSG00000032349	Elovl5	ELOVL5
ENSMUSG00000069272.6	23.244	-1.0661	0.439008	-2.42844	0.0151641	0.186358	ENSMUSG00000069272	H2ac8	H2AC8
ENSMUSG00000061780.6	9.3333	3.08772	1.27168	2.42805	0.0151802	0.186358	ENSMUSG00000061780	Cfd	CFD
ENSMUSG00000032060.10	338.111	0.693887	0.285823	2.42768	0.0151958	0.186358	ENSMUSG00000032060	Cryab	CRYAB
ENSMUSG00000023391.8	9.29823	1.53717	0.633206	2.4276	0.0151992	0.186358	ENSMUSG00000023391	Dlx2	DLX2
ENSMUSG00000000296.8	203.393	0.515042	0.212164	2.42757	0.0152004	0.186358	ENSMUSG00000000296	Tpd52l1	TPD52L1
ENSMUSG00000032254.10	88.4737	1.10406	0.455	2.42651	0.0152449	0.186783	ENSMUSG00000032254	Kif23	KIF23
ENSMUSG00000006586.15	884.745	-0.522996	0.215709	-2.42454	0.0153277	0.187678	ENSMUSG00000006586	Runx1t1	RUNX1T1
ENSMUSG00000010755.17	1330.91	-0.587775	0.24245	-2.42431	0.0153374	0.187678	ENSMUSG00000010755	Cars	CARS
ENSMUSG00000016262.14	215.281	0.467832	0.193028	2.42365	0.0153656	0.187903	ENSMUSG00000016262	Sertad4	SERTAD4
ENSMUSG00000014778.10	250.771	0.560722	0.231408	2.42309	0.0153891	0.187977	ENSMUSG00000014778	Fhod1	FHOD1
ENSMUSG00000060093.6	13.8455	-1.04549	0.431476	-2.42304	0.0153912	0.187977	ENSMUSG00000060093	H4c1	H4C1
ENSMUSG00000033615.9	231.235	1.48829	0.614368	2.42248	0.015415	0.188149	ENSMUSG00000033615	Cplx1	CPLX1
ENSMUSG00000050822.11	1817.32	0.583522	0.24106	2.42065	0.0154929	0.188971	ENSMUSG00000050822	Slc29a4	SLC29A4
ENSMUSG00000035200.7	130.37	0.970383	0.400913	2.42043	0.015502	0.188971	ENSMUSG00000035200	Chrnb4	CHRNB4
ENSMUSG00000066233.6	458.896	-0.528848	0.218521	-2.42012	0.0155153	0.189013	ENSMUSG00000066233	Tmem42	TMEM42
ENSMUSG00000047638.15	290.89	-0.449544	0.185794	-2.41958	0.0155385	0.189176	ENSMUSG00000047638	Nr1h4	NR1H4
ENSMUSG00000045532.5	13.933	1.27514	0.527247	2.41849	0.015585	0.189571	ENSMUSG00000045532	C1ql1	C1QL1
ENSMUSG00000030610.13	196.452	-0.384638	0.159049	-2.41836	0.0155907	0.189571	ENSMUSG00000030610	Det1	DET1
ENSMUSG00000021565.16	304.166	-0.914782	0.378569	-2.41642	0.015674	0.190464	ENSMUSG00000021565	Slc6a19	SLC6A19
ENSMUSG00000002249.21	76.2171	0.864387	0.357997	2.41451	0.0157563	0.191344	ENSMUSG00000002249	Tead3	TEAD3
ENSMUSG00000050132.13	353.08	-0.389792	0.161476	-2.41393	0.0157815	0.191409	ENSMUSG00000050132	Sarm1	SARM1
ENSMUSG00000047767.17	782.925	-0.405898	0.168148	-2.41393	0.0157816	0.191409	ENSMUSG00000047767	Atg16l2	ATG16L2
ENSMUSG00000030672.12	32.7883	-0.723318	0.299738	-2.41317	0.0158143	0.191555	ENSMUSG00000030672	Mylpf	MYLPF
ENSMUSG00000038248.8	806.202	-0.433105	0.179484	-2.41306	0.0158191	0.191555	ENSMUSG00000038248	Sobp	SOBP
ENSMUSG00000115087.1	18.4472	-1.30392	0.540423	-2.41278	0.0158316	0.191555	ENSMUSG00000115087	Gm48998	GM48998
ENSMUSG00000000686.11	667.105	-0.498384	0.206575	-2.4126	0.015839	0.191555	ENSMUSG00000000686	Abhd15	ABHD15
ENSMUSG00000106528.1	27.7939	-1.14699	0.475434	-2.4125	0.0158434	0.191555	ENSMUSG00000106528	Gm42841	GM42841
ENSMUSG00000092557.1	4.33898	-2.31167	0.958396	-2.41202	0.0158642	0.191686	ENSMUSG00000092557	Gm8696	GM8696
ENSMUSG00000063239.17	8.09925	-2.46429	1.02181	-2.41169	0.0158786	0.191739	ENSMUSG00000063239	Grm4	GRM4
ENSMUSG00000029249.15	163.609	0.825503	0.342364	2.41119	0.0159006	0.191807	ENSMUSG00000029249	Rest	REST
ENSMUSG00000067813.3	6.25011	-2.7962	1.15998	-2.41056	0.015928	0.19182	ENSMUSG00000067813	Xkr9	XKR9
ENSMUSG00000023232.17	436.422	0.73157	0.303506	2.4104	0.0159351	0.19182	ENSMUSG00000023232	Serinc2	SERINC2
ENSMUSG00000035944.17	616.838	-0.404226	0.167701	-2.4104	0.0159351	0.19182	ENSMUSG00000035944	Ttc38	TTC38
ENSMUSG00000032940.16	62.7135	0.69413	0.288213	2.4084	0.0160228	0.192594	ENSMUSG00000032940	Rbm11	RBM11
ENSMUSG00000085833.2	103.6	-0.523249	0.217278	-2.40821	0.0160311	0.192594	ENSMUSG00000085833	Gm13003	GM13003
ENSMUSG00000069633.12	381.132	-0.619188	0.257129	-2.40808	0.0160365	0.192594	ENSMUSG00000069633	Pex11g	PEX11G
ENSMUSG00000037594.11	427.42	-0.438925	0.182277	-2.40802	0.0160395	0.192594	ENSMUSG00000037594	Clba1	CLBA1
ENSMUSG00000029594.12	376.38	-0.494359	0.205391	-2.40691	0.016088	0.192984	ENSMUSG00000029594	Rbm19	RBM19
ENSMUSG00000026641.13	1294.69	-0.348557	0.144833	-2.4066	0.0161016	0.192984	ENSMUSG00000026641	Usf1	USF1
ENSMUSG00000029847.13	24.9316	-0.974064	0.404841	-2.40604	0.0161264	0.193058	ENSMUSG00000029847	Slc23a4	SLC23A4
ENSMUSG00000036019.8	373.561	-0.55669	0.231388	-2.40587	0.0161339	0.193058	ENSMUSG00000036019	Tmtc2	TMTC2
ENSMUSG00000079669.2	26.12	0.943486	0.392176	2.40577	0.0161384	0.193058	ENSMUSG00000079669	Gm17396	GM17396
ENSMUSG00000072849.10	29.6233	2.07339	0.862047	2.40519	0.016164	0.193245	ENSMUSG00000072849	Serpina1e	SERPINA1E
ENSMUSG00000003153.10	231.614	0.87906	0.365645	2.40413	0.0162108	0.193564	ENSMUSG00000003153	Slc2a3	SLC2A3
ENSMUSG00000095042.1	3.25854	3.69131	1.53634	2.40266	0.0162762	0.194104	ENSMUSG00000095042	Gm12537	GM12537
ENSMUSG00000001552.14	2797.08	0.316862	0.131938	2.4016	0.0163237	0.19455	ENSMUSG00000001552	Jup	JUP
ENSMUSG00000047996.16	36.15	0.779398	0.324661	2.40065	0.016366	0.194933	ENSMUSG00000047996	Prrg1	PRRG1
ENSMUSG00000023011.8	159.501	1.43042	0.596019	2.39996	0.0163969	0.19518	ENSMUSG00000023011	Faim2	FAIM2
ENSMUSG00000049538.14	16.9348	1.51407	0.631116	2.39905	0.0164379	0.195547	ENSMUSG00000049538	Adamts16	ADAMTS16
ENSMUSG00000017692.8	362.713	-0.484589	0.202087	-2.39793	0.0164881	0.195858	ENSMUSG00000017692	Rhbdl3	RHBDL3
ENSMUSG00000016664.16	934.844	0.355925	0.148432	2.39789	0.0164896	0.195858	ENSMUSG00000016664	Pacsin2	PACSIN2
ENSMUSG00000030117.5	6.07513	-1.7815	0.742977	-2.39778	0.0164946	0.195858	ENSMUSG00000030117	Gdf3	GDF3
ENSMUSG00000063623.4	24.4848	0.791729	0.33028	2.39715	0.0165233	0.196078	ENSMUSG00000063623	C230062I16Rik	C230062I16RIK
ENSMUSG00000035969.15	551.825	0.355718	0.148468	2.39592	0.0165785	0.196612	ENSMUSG00000035969	Rusc2	RUSC2
ENSMUSG00000091636.2	220.186	-0.491982	0.205436	-2.39481	0.0166289	0.197088	ENSMUSG00000091636	Akain1	AKAIN1
ENSMUSG00000033022.8	259.995	0.73036	0.305011	2.39454	0.0166413	0.197113	ENSMUSG00000033022	Cdo1	CDO1
ENSMUSG00000040140.15	3.63463	3.28874	1.37426	2.39309	0.016707	0.197504	ENSMUSG00000040140	Tdrd6	TDRD6
ENSMUSG00000024479.3	626.48	0.739224	0.3089	2.39309	0.0167073	0.197504	ENSMUSG00000024479	Mal2	MAL2
ENSMUSG00000024785.7	348.107	-0.333386	0.139347	-2.39249	0.0167344	0.197504	ENSMUSG00000024785	Rcl1	RCL1
ENSMUSG00000048905.5	58.3511	1.09492	0.457669	2.39238	0.0167396	0.197504	ENSMUSG00000048905	Bnip5	BNIP5
ENSMUSG00000016487.15	1432.66	0.502949	0.210237	2.3923	0.0167433	0.197504	ENSMUSG00000016487	Ppfibp1	PPFIBP1
ENSMUSG00000036151.15	55.2894	-1.65341	0.691211	-2.39205	0.0167544	0.197504	ENSMUSG00000036151	Tm6sf2	TM6SF2
ENSMUSG00000086096.1	12.5127	1.37636	0.575428	2.3919	0.0167616	0.197504	ENSMUSG00000086096	Gm12688	GM12688
ENSMUSG00000051076.8	36.7831	1.3907	0.581428	2.39187	0.0167629	0.197504	ENSMUSG00000051076	Vtcn1	VTCN1
ENSMUSG00000028184.12	201.511	0.529153	0.221253	2.39162	0.0167742	0.197504	ENSMUSG00000028184	Adgrl2	ADGRL2
ENSMUSG00000039427.14	1147.79	-0.352259	0.147316	-2.39119	0.0167939	0.197504	ENSMUSG00000039427	Alg1	ALG1
ENSMUSG00000068341.8	377.668	-1.2091	0.505648	-2.39118	0.0167943	0.197504	ENSMUSG00000068341	Reg3d	REG3D
ENSMUSG00000029878.6	3452.32	0.606783	0.253772	2.39105	0.0168002	0.197504	ENSMUSG00000029878	Dbpht2	DBPHT2
ENSMUSG00000027584.17	54.3038	0.838638	0.350764	2.39089	0.0168077	0.197504	ENSMUSG00000027584	Oprl1	OPRL1
ENSMUSG00000000120.6	173.848	0.896952	0.375246	2.3903	0.0168344	0.197696	ENSMUSG00000000120	Ngfr	NGFR
ENSMUSG00000025432.11	219.206	1.1338	0.474498	2.38947	0.0168726	0.197971	ENSMUSG00000025432	Avil	AVIL
ENSMUSG00000002280.11	735.454	-0.300672	0.125839	-2.38935	0.0168784	0.197971	ENSMUSG00000002280	Ciao3	CIAO3
ENSMUSG00000021182.16	450.192	0.990305	0.414769	2.38761	0.0169585	0.19879	ENSMUSG00000021182	Ccdc88c	CCDC88C
ENSMUSG00000054920.12	214.434	0.477877	0.200195	2.38706	0.0169839	0.198966	ENSMUSG00000054920	Klhl5	KLHL5
ENSMUSG00000001333.9	34.32	0.958096	0.401434	2.38668	0.0170012	0.198984	ENSMUSG00000001333	Sync	SYNC
ENSMUSG00000000346.9	3430.26	-0.38875	0.162891	-2.38657	0.0170062	0.198984	ENSMUSG00000000346	Dazap2	DAZAP2
ENSMUSG00000030137.8	57.7959	0.795155	0.333246	2.38609	0.0170286	0.199126	ENSMUSG00000030137	Tuba8	TUBA8
ENSMUSG00000073987.4	1198.98	-1.00689	0.422117	-2.38534	0.0170634	0.199411	ENSMUSG00000073987	Ggh	GGH
ENSMUSG00000035266.16	420.419	-0.529611	0.222083	-2.38475	0.017091	0.199441	ENSMUSG00000035266	Helq	HELQ
ENSMUSG00000020758.15	491.843	0.914542	0.383509	2.38467	0.0170945	0.199441	ENSMUSG00000020758	Itgb4	ITGB4
ENSMUSG00000118310.1	108.25	-0.669531	0.280771	-2.38461	0.017097	0.199441	ENSMUSG00000118310	Gm50268	GM50268
ENSMUSG00000022449.14	14.4468	1.61782	0.678631	2.38395	0.0171278	0.199679	ENSMUSG00000022449	Adamts20	ADAMTS20
ENSMUSG00000015133.17	252.327	0.664159	0.278808	2.38214	0.0172125	0.200243	ENSMUSG00000015133	Lrrk1	LRRK1
ENSMUSG00000028970.9	49.8297	1.08171	0.454101	2.38209	0.0172146	0.200243	ENSMUSG00000028970	Abcb1b	ABCB1B
ENSMUSG00000052353.13	27.6706	0.911728	0.382748	2.38206	0.0172161	0.200243	ENSMUSG00000052353	Cemip	CEMIP
ENSMUSG00000020097.14	1778.95	-0.489206	0.205374	-2.38202	0.0172178	0.200243	ENSMUSG00000020097	Sgpl1	SGPL1
ENSMUSG00000037974.16	25.5604	-7.19896	3.02554	-2.37939	0.0173411	0.201555	ENSMUSG00000037974	Muc5ac	MUC5AC
ENSMUSG00000027953.13	1239.24	-0.402716	0.169322	-2.3784	0.017388	0.201978	ENSMUSG00000027953	Slc50a1	SLC50A1
ENSMUSG00000010936.11	776.495	-0.421371	0.177193	-2.37803	0.0174053	0.202057	ENSMUSG00000010936	Vac14	VAC14
ENSMUSG00000049580.12	118.978	-0.55117	0.231799	-2.37779	0.0174166	0.202066	ENSMUSG00000049580	Tsku	TSKU
ENSMUSG00000105509.1	68.8683	-0.764198	0.321592	-2.37629	0.0174875	0.202363	ENSMUSG00000105509	C130013H08Rik	C130013H08RIK
ENSMUSG00000051985.12	4.38555	2.65686	1.1181	2.37623	0.0174904	0.202363	ENSMUSG00000051985	Igfn1	IGFN1
ENSMUSG00000028399.18	425.329	0.578022	0.243254	2.37621	0.0174915	0.202363	ENSMUSG00000028399	Ptprd	PTPRD
ENSMUSG00000028518.8	279.342	0.766802	0.322711	2.37613	0.0174955	0.202363	ENSMUSG00000028518	Prkaa2	PRKAA2
ENSMUSG00000063446.4	197.03	-0.661815	0.278549	-2.37593	0.0175046	0.202363	ENSMUSG00000063446	Plppr1	PLPPR1
ENSMUSG00000101438.2	174.534	0.705193	0.296808	2.37592	0.0175053	0.202363	ENSMUSG00000101438	Gm19412	GM19412
ENSMUSG00000026806.15	425.163	-0.345097	0.145335	-2.3745	0.0175728	0.203022	ENSMUSG00000026806	Ddx31	DDX31
ENSMUSG00000032584.12	50.3781	1.36638	0.575593	2.37387	0.0176029	0.203161	ENSMUSG00000032584	Mst1r	MST1R
ENSMUSG00000040183.13	188.437	0.50832	0.214138	2.3738	0.017606	0.203161	ENSMUSG00000040183	Ankrd6	ANKRD6
ENSMUSG00000028108.15	305.194	0.773005	0.325686	2.37347	0.0176219	0.203205	ENSMUSG00000028108	Ecm1	ECM1
ENSMUSG00000055980.2	260.434	-0.648116	0.273102	-2.37317	0.0176363	0.203205	ENSMUSG00000055980	Irs1	IRS1
ENSMUSG00000037188.7	7.64135	1.90132	0.801211	2.37306	0.0176415	0.203205	ENSMUSG00000037188	Grhl3	GRHL3
ENSMUSG00000025979.13	1288.97	-0.413714	0.174441	-2.37166	0.0177083	0.203852	ENSMUSG00000025979	Mob4	MOB4
ENSMUSG00000044835.15	47.205	0.872893	0.368219	2.37058	0.0177603	0.204329	ENSMUSG00000044835	Ankrd45	ANKRD45
ENSMUSG00000004347.17	367.182	-0.562369	0.237377	-2.3691	0.0178316	0.205027	ENSMUSG00000004347	Pde1c	PDE1C
ENSMUSG00000039987.15	174.72	0.789508	0.333354	2.36837	0.0178664	0.205304	ENSMUSG00000039987	Phtf2	PHTF2
ENSMUSG00000034758.12	276.934	-0.579934	0.245002	-2.36706	0.0179302	0.205914	ENSMUSG00000034758	Tle6	TLE6
ENSMUSG00000063714.15	106.155	-0.559188	0.23633	-2.36613	0.0179751	0.206306	ENSMUSG00000063714	Sp3os	SP3OS
ENSMUSG00000046807.10	86.4764	1.09966	0.464872	2.36551	0.0180051	0.206527	ENSMUSG00000046807	Lrrc75b	LRRC75B
ENSMUSG00000036295.5	91.1929	0.775578	0.32795	2.36493	0.0180336	0.206731	ENSMUSG00000036295	Lrrn3	LRRN3
ENSMUSG00000085840.1	3.10475	-2.66106	1.12552	-2.36429	0.0180646	0.206868	ENSMUSG00000085840	Gm11261	GM11261
ENSMUSG00000035376.10	348.536	-0.694751	0.293858	-2.36424	0.018067	0.206868	ENSMUSG00000035376	Hacd2	HACD2
ENSMUSG00000002341.8	12.1817	1.60235	0.677889	2.36373	0.0180918	0.207028	ENSMUSG00000002341	Ncan	NCAN
ENSMUSG00000070354.13	14.6844	1.4631	0.619293	2.36254	0.0181502	0.207452	ENSMUSG00000070354	Evi2	EVI2
ENSMUSG00000049892.7	1463.98	-0.686766	0.29069	-2.36253	0.0181504	0.207452	ENSMUSG00000049892	Rasd1	RASD1
ENSMUSG00000019873.8	949.803	-0.448645	0.190085	-2.36024	0.0182632	0.208585	ENSMUSG00000019873	Reep3	REEP3
ENSMUSG00000070527.3	7.3348	1.29903	0.550419	2.36007	0.0182713	0.208585	ENSMUSG00000070527	Mkrn3	MKRN3
ENSMUSG00000001120.15	1246.38	-0.311732	0.132122	-2.35942	0.0183035	0.20883	ENSMUSG00000001120	Pcbp3	PCBP3
ENSMUSG00000055239.10	1255.18	-0.305795	0.129728	-2.3572	0.0184132	0.209956	ENSMUSG00000055239	Kcmf1	KCMF1
ENSMUSG00000037683.14	7.56332	1.51508	0.642942	2.35648	0.018449	0.210164	ENSMUSG00000037683	Armc3	ARMC3
ENSMUSG00000062115.15	996.332	-0.346005	0.146836	-2.3564	0.0184532	0.210164	ENSMUSG00000062115	Rai1	RAI1
ENSMUSG00000033781.7	706.16	-0.338615	0.14373	-2.35592	0.018477	0.21031	ENSMUSG00000033781	Asb13	ASB13
ENSMUSG00000028040.7	44.4195	1.41987	0.603038	2.35452	0.0185466	0.210978	ENSMUSG00000028040	Efna4	EFNA4
ENSMUSG00000039521.13	13.0614	1.81737	0.772065	2.3539	0.0185774	0.211203	ENSMUSG00000039521	Foxp3	FOXP3
ENSMUSG00000024176.10	10.1837	1.27027	0.540088	2.35196	0.0186746	0.212183	ENSMUSG00000024176	Sox8	SOX8
ENSMUSG00000085929.1	49.4792	-0.570219	0.242675	-2.34972	0.0187876	0.213341	ENSMUSG00000085929	Gm13421	GM13421
ENSMUSG00000029154.13	3.83395	-3.59619	1.53075	-2.3493	0.0188089	0.213456	ENSMUSG00000029154	Cwh43	CWH43
ENSMUSG00000025140.15	696.354	-0.612855	0.260949	-2.34857	0.0188459	0.213749	ENSMUSG00000025140	Pycr1	PYCR1
ENSMUSG00000031983.7	3077.26	-0.304791	0.129795	-2.34825	0.0188618	0.213804	ENSMUSG00000031983	2310022B05Rik	2310022B05RIK
ENSMUSG00000022900.14	1110.89	-0.402486	0.171443	-2.34764	0.0188928	0.214029	ENSMUSG00000022900	Ildr1	ILDR1
ENSMUSG00000022562.15	272.921	0.463674	0.197529	2.34737	0.0189065	0.214059	ENSMUSG00000022562	Oplah	OPLAH
ENSMUSG00000094198.2	29.9756	3.43485	1.46377	2.34657	0.018947	0.21429	ENSMUSG00000094198	Ighv1-50	IGHV1-50
ENSMUSG00000044037.15	384.966	0.733505	0.312592	2.34653	0.0189492	0.21429	ENSMUSG00000044037	Als2cl	ALS2CL
ENSMUSG00000041544.11	9.95081	2.12829	0.907671	2.34478	0.0190384	0.215172	ENSMUSG00000041544	Disp3	DISP3
ENSMUSG00000047606.4	15.7052	-1.10516	0.471499	-2.34392	0.0190821	0.215509	ENSMUSG00000047606	Ankrd34c	ANKRD34C
ENSMUSG00000074922.1	594.24	-0.431633	0.184181	-2.34352	0.0191027	0.215509	ENSMUSG00000074922	Fam122a	FAM122A
ENSMUSG00000024485.16	3.60616	3.43277	1.46494	2.34329	0.0191146	0.215509	ENSMUSG00000024485	Slc4a9	SLC4A9
ENSMUSG00000045319.13	489.967	0.597622	0.255044	2.34321	0.0191185	0.215509	ENSMUSG00000045319	Proser2	PROSER2
ENSMUSG00000078612.9	14.125	1.31458	0.561043	2.3431	0.0191243	0.215509	ENSMUSG00000078612	Fyb2	FYB2
ENSMUSG00000041798.15	2132.88	-0.427675	0.182578	-2.34242	0.0191592	0.215683	ENSMUSG00000041798	Gck	GCK
ENSMUSG00000027995.10	593.342	-0.498849	0.212968	-2.34236	0.0191621	0.215683	ENSMUSG00000027995	Tlr2	TLR2
ENSMUSG00000101856.1	129.329	-0.619499	0.26485	-2.33905	0.0193327	0.217349	ENSMUSG00000101856	1700096K18Rik	1700096K18RIK
ENSMUSG00000006024.13	5427.48	-0.317503	0.135765	-2.33863	0.0193545	0.217467	ENSMUSG00000006024	Napa	NAPA
ENSMUSG00000047591.5	8542.17	-0.533116	0.228017	-2.33805	0.0193847	0.217679	ENSMUSG00000047591	Mafa	MAFA
ENSMUSG00000091366.1	15.1649	-1.61587	0.691326	-2.33735	0.0194211	0.217932	ENSMUSG00000091366	Gm17040	GM17040
ENSMUSG00000086355.1	9.89683	-1.33581	0.571546	-2.33718	0.0194298	0.217932	ENSMUSG00000086355	4933428C19Rik	4933428C19RIK
ENSMUSG00000028238.6	3.58848	2.51433	1.07611	2.33651	0.0194649	0.218197	ENSMUSG00000028238	Atp6v0d2	ATP6V0D2
ENSMUSG00000029190.19	1895.75	-0.446644	0.191266	-2.3352	0.019533	0.218833	ENSMUSG00000029190	D5Ertd579e	D5ERTD579E
ENSMUSG00000085282.8	142.677	-0.556021	0.238156	-2.33469	0.0195596	0.21895	ENSMUSG00000085282	Gm15663	GM15663
ENSMUSG00000039157.12	4628.77	-0.281996	0.120792	-2.33456	0.0195662	0.21895	ENSMUSG00000039157	Fam102a	FAM102A
ENSMUSG00000020682.17	35.2493	1.09165	0.467666	2.33424	0.0195831	0.219012	ENSMUSG00000020682	Mmp28	MMP28
ENSMUSG00000001506.10	1497.75	1.15673	0.495763	2.33324	0.0196357	0.219473	ENSMUSG00000001506	Col1a1	COL1A1
ENSMUSG00000031563.8	245.379	0.45915	0.196878	2.33216	0.0196922	0.219977	ENSMUSG00000031563	Wwc2	WWC2
ENSMUSG00000024907.7	982.874	-1.26789	0.543943	-2.33092	0.0197576	0.220579	ENSMUSG00000024907	Gal	GAL
ENSMUSG00000104025.1	17.7973	1.15718	0.496563	2.33038	0.0197863	0.220771	ENSMUSG00000104025	E330040D14Rik	E330040D14RIK
ENSMUSG00000055809.7	26.0653	1.31182	0.563171	2.32934	0.019841	0.221253	ENSMUSG00000055809	Dnaaf3	DNAAF3
ENSMUSG00000022548.14	309.089	0.804741	0.345523	2.32905	0.0198562	0.221295	ENSMUSG00000022548	Apod	APOD
ENSMUSG00000029470.15	1122.02	-0.445268	0.191224	-2.32852	0.0198845	0.221481	ENSMUSG00000029470	P2rx4	P2RX4
ENSMUSG00000034312.15	587.365	0.566952	0.243757	2.32589	0.0200242	0.222792	ENSMUSG00000034312	Iqsec1	IQSEC1
ENSMUSG00000023923.10	633.615	-0.427682	0.183889	-2.32577	0.020031	0.222792	ENSMUSG00000023923	Tbc1d5	TBC1D5
ENSMUSG00000060240.12	110.753	1.27475	0.548123	2.32566	0.020037	0.222792	ENSMUSG00000060240	Cend1	CEND1
ENSMUSG00000015087.14	3131.22	-0.511848	0.220131	-2.32519	0.0200616	0.222938	ENSMUSG00000015087	Rabl6	RABL6
ENSMUSG00000027309.18	2011.32	-0.436233	0.187747	-2.32351	0.0201519	0.223711	ENSMUSG00000027309	4930402H24Rik	4930402H24RIK
ENSMUSG00000019843.14	534.697	0.490475	0.211097	2.32346	0.0201545	0.223711	ENSMUSG00000019843	Fyn	FYN
ENSMUSG00000040136.10	22132.2	-0.436857	0.188059	-2.32298	0.0201804	0.22387	ENSMUSG00000040136	Abcc8	ABCC8
ENSMUSG00000022947.8	250.854	0.785036	0.338062	2.32216	0.0202241	0.224225	ENSMUSG00000022947	Cbr3	CBR3
ENSMUSG00000000215.11	6.36119e+06	-0.668613	0.287988	-2.32167	0.0202507	0.224296	ENSMUSG00000000215	Ins2	INS2
ENSMUSG00000025036.7	1265.59	-0.413261	0.178006	-2.32161	0.0202538	0.224296	ENSMUSG00000025036	Sfxn2	SFXN2
ENSMUSG00000118106.1	29.8613	-0.713451	0.307404	-2.32089	0.0202929	0.2246	ENSMUSG00000118106	AC115752.1	AC115752.1
ENSMUSG00000025790.14	757.624	0.455519	0.196354	2.31989	0.020347	0.225069	ENSMUSG00000025790	Slco3a1	SLCO3A1
ENSMUSG00000043496.7	65.2377	0.831463	0.358477	2.31943	0.0203716	0.225212	ENSMUSG00000043496	Tril	TRIL
ENSMUSG00000112693.1	3.07946	-5.34327	2.30484	-2.31829	0.0204337	0.225613	ENSMUSG00000112693	Gm5512	GM5512
ENSMUSG00000039234.11	2215.99	-0.630988	0.272191	-2.31818	0.0204395	0.225613	ENSMUSG00000039234	Sec24d	SEC24D
ENSMUSG00000026424.8	95.7276	1.00639	0.43414	2.31811	0.0204431	0.225613	ENSMUSG00000026424	Gpr37l1	GPR37L1
ENSMUSG00000053886.4	374.393	1.06303	0.458736	2.31729	0.0204877	0.225976	ENSMUSG00000053886	Sh2d4a	SH2D4A
ENSMUSG00000042363.14	1068.1	-0.466725	0.201453	-2.31679	0.020515	0.226148	ENSMUSG00000042363	Lgalsl	LGALSL
ENSMUSG00000001786.14	909.817	-0.378682	0.16347	-2.31652	0.0205298	0.22618	ENSMUSG00000001786	Fbxo7	FBXO7
ENSMUSG00000031840.12	2382.75	-0.289466	0.125008	-2.31558	0.0205813	0.226548	ENSMUSG00000031840	Rab3a	RAB3A
ENSMUSG00000027316.15	123.152	1.01005	0.436218	2.31548	0.0205867	0.226548	ENSMUSG00000027316	Gfra4	GFRA4
ENSMUSG00000024805.16	876.738	-0.394805	0.170537	-2.31507	0.020609	0.226664	ENSMUSG00000024805	Pcgf5	PCGF5
ENSMUSG00000116626.1	4.52272	-2.12755	0.91936	-2.31417	0.0206585	0.227079	ENSMUSG00000116626	Gm49705	GM49705
ENSMUSG00000091019.1	5.64624	-2.41325	1.04338	-2.31292	0.0207271	0.227488	ENSMUSG00000091019	Gm7502	GM7502
ENSMUSG00000025786.17	1924.67	-0.284367	0.122949	-2.31289	0.0207288	0.227488	ENSMUSG00000025786	Zdhhc3	ZDHHC3
ENSMUSG00000053007.9	37.7843	0.873951	0.377869	2.31284	0.0207313	0.227488	ENSMUSG00000053007	Creb5	CREB5
ENSMUSG00000041135.15	226.092	0.339581	0.146874	2.31207	0.020774	0.227827	ENSMUSG00000041135	Ripk2	RIPK2
ENSMUSG00000109095.1	94.1099	-0.960401	0.415646	-2.31062	0.0208539	0.228566	ENSMUSG00000109095	Gm44799	GM44799
ENSMUSG00000052981.6	50.9279	0.597183	0.258534	2.30988	0.0208946	0.228566	ENSMUSG00000052981	Ube2ql1	UBE2QL1
ENSMUSG00000083695.6	398.499	-0.598678	0.259184	-2.30986	0.020896	0.228566	ENSMUSG00000083695	Rnf138rt1	RNF138RT1
ENSMUSG00000034898.17	757.471	-0.597121	0.258519	-2.30977	0.0209007	0.228566	ENSMUSG00000034898	Filip1	FILIP1
ENSMUSG00000019952.15	635.564	-0.342575	0.148327	-2.30959	0.0209108	0.228566	ENSMUSG00000019952	Poc1b	POC1B
ENSMUSG00000029730.16	606.526	0.315918	0.136787	2.30956	0.0209127	0.228566	ENSMUSG00000029730	Mcm7	MCM7
ENSMUSG00000046186.8	21.4808	1.17141	0.507288	2.30916	0.020935	0.22868	ENSMUSG00000046186	Cd109	CD109
ENSMUSG00000020668.10	551.553	0.474317	0.205431	2.30889	0.0209497	0.228711	ENSMUSG00000020668	Kif3c	KIF3C
ENSMUSG00000026347.13	1288.88	-0.514382	0.222954	-2.30712	0.021048	0.229653	ENSMUSG00000026347	Tmem163	TMEM163
ENSMUSG00000044485.4	41.8535	-1.99035	0.862829	-2.30677	0.0210677	0.229738	ENSMUSG00000044485	Klk1b11	KLK1B11
ENSMUSG00000115423.2	175.154	-0.492514	0.213535	-2.30648	0.0210839	0.229784	ENSMUSG00000115423	AL731706.1	AL731706.1
ENSMUSG00000037703.14	467.517	0.472125	0.204736	2.30602	0.0211097	0.229936	ENSMUSG00000037703	Lzts3	LZTS3
ENSMUSG00000109162.1	100.188	-0.885322	0.38413	-2.30475	0.0211808	0.230242	ENSMUSG00000109162	2900027M19Rik	2900027M19RIK
ENSMUSG00000078867.9	84.7905	-0.741666	0.321829	-2.30453	0.0211928	0.230242	ENSMUSG00000078867	Gm14418	GM14418
ENSMUSG00000094319.2	2.99097	-5.29079	2.29583	-2.30452	0.0211933	0.230242	ENSMUSG00000094319	Igkv4-54	IGKV4-54
ENSMUSG00000115783.1	50.466	1.53477	0.665994	2.30447	0.021196	0.230242	ENSMUSG00000115783	Bc1	BC1
ENSMUSG00000037509.21	111.201	0.614727	0.26677	2.30433	0.021204	0.230242	ENSMUSG00000037509	Arhgef4	ARHGEF4
ENSMUSG00000026834.13	158.089	-0.946381	0.410714	-2.30423	0.0212096	0.230242	ENSMUSG00000026834	Acvr1c	ACVR1C
ENSMUSG00000017417.14	47.6876	0.606697	0.263352	2.30375	0.0212367	0.230406	ENSMUSG00000017417	Plxdc1	PLXDC1
ENSMUSG00000058979.7	878.328	-0.260679	0.113183	-2.30316	0.0212698	0.230608	ENSMUSG00000058979	Hdhd5	HDHD5
ENSMUSG00000020986.13	756.638	0.550979	0.239245	2.30299	0.0212794	0.230608	ENSMUSG00000020986	Sec23a	SEC23A
ENSMUSG00000026114.14	25.3357	1.57003	0.681849	2.30261	0.021301	0.230713	ENSMUSG00000026114	Cnga3	CNGA3
ENSMUSG00000059014.8	6.02723	-2.4128	1.04814	-2.30198	0.0213363	0.230965	ENSMUSG00000059014	Gm5409	GM5409
ENSMUSG00000042901.10	1295.82	-0.253	0.109961	-2.30081	0.0214024	0.231551	ENSMUSG00000042901	Aida	AIDA
ENSMUSG00000098912.7	88.3638	0.718579	0.312387	2.30028	0.0214323	0.231744	ENSMUSG00000098912	1500004A13Rik	1500004A13RIK
ENSMUSG00000033955.13	1488.68	0.569654	0.247671	2.30004	0.0214458	0.231759	ENSMUSG00000033955	Tnks1bp1	TNKS1BP1
ENSMUSG00000071064.15	802.719	-0.314715	0.136855	-2.29963	0.0214694	0.231884	ENSMUSG00000071064	Zfp827	ZFP827
ENSMUSG00000022865.14	1256.38	0.534964	0.232691	2.29904	0.0215028	0.232016	ENSMUSG00000022865	Cxadr	CXADR
ENSMUSG00000022935.16	5.80708	1.85542	0.80706	2.29899	0.0215057	0.232016	ENSMUSG00000022935	Grik1	GRIK1
ENSMUSG00000022780.5	25.0552	1.17383	0.510693	2.29851	0.021533	0.23218	ENSMUSG00000022780	Meltf	MELTF
ENSMUSG00000025470.11	317.916	-0.476629	0.207439	-2.29768	0.02158	0.232556	ENSMUSG00000025470	Zfp511	ZFP511
ENSMUSG00000002820.6	922.032	-0.384206	0.16723	-2.29747	0.0215922	0.232558	ENSMUSG00000002820	Atg4d	ATG4D
ENSMUSG00000114693.1	20.5552	-0.984004	0.428401	-2.29692	0.0216232	0.232717	ENSMUSG00000114693	Gm41177	GM41177
ENSMUSG00000040260.8	99.0084	0.770559	0.335545	2.29644	0.0216505	0.232717	ENSMUSG00000040260	Daam2	DAAM2
ENSMUSG00000094433.2	83.0407	-2.88743	1.25738	-2.29639	0.0216534	0.232717	ENSMUSG00000094433	Igkv5-43	IGKV5-43
ENSMUSG00000021610.8	3378.68	-0.420277	0.183052	-2.29594	0.0216791	0.232717	ENSMUSG00000021610	Clptm1l	CLPTM1L
ENSMUSG00000074466.12	184.951	-0.648821	0.282609	-2.29582	0.0216859	0.232717	ENSMUSG00000074466	Gm15417	GM15417
ENSMUSG00000035578.16	91.8837	0.828135	0.360723	2.29576	0.0216894	0.232717	ENSMUSG00000035578	Iqcg	IQCG
ENSMUSG00000001802.16	1771.59	-0.248791	0.108383	-2.29547	0.021706	0.232717	ENSMUSG00000001802	Lrp3	LRP3
ENSMUSG00000028546.17	1098.48	-0.541789	0.236071	-2.29503	0.0217314	0.232717	ENSMUSG00000028546	Elavl4	ELAVL4
ENSMUSG00000087177.7	159.329	0.443301	0.193174	2.29483	0.0217429	0.232717	ENSMUSG00000087177	E130307A14Rik	E130307A14RIK
ENSMUSG00000036334.12	45.5547	1.18364	0.515858	2.2945	0.0217619	0.232717	ENSMUSG00000036334	Igsf10	IGSF10
ENSMUSG00000036968.15	346.004	0.368234	0.160492	2.2944	0.0217674	0.232717	ENSMUSG00000036968	Cnpy4	CNPY4
ENSMUSG00000063681.14	109.751	-0.677066	0.295103	-2.29433	0.0217713	0.232717	ENSMUSG00000063681	Crb1	CRB1
ENSMUSG00000022871.13	13.1324	-1.04629	0.456068	-2.29415	0.0217822	0.232717	ENSMUSG00000022871	Fetub	FETUB
ENSMUSG00000024366.8	217.899	0.507619	0.221268	2.29414	0.0217824	0.232717	ENSMUSG00000024366	Gfra3	GFRA3
ENSMUSG00000031570.17	1714.65	-0.589838	0.257118	-2.29404	0.0217885	0.232717	ENSMUSG00000031570	Plpp5	PLPP5
ENSMUSG00000019027.8	12.6925	1.68387	0.73439	2.29289	0.0218545	0.233092	ENSMUSG00000019027	Dnah1	DNAH1
ENSMUSG00000026167.14	12.1522	1.19008	0.519034	2.29288	0.0218551	0.233092	ENSMUSG00000026167	Wnt10a	WNT10A
ENSMUSG00000055022.14	947.407	-0.431376	0.188148	-2.29275	0.0218624	0.233092	ENSMUSG00000055022	Cntn1	CNTN1
ENSMUSG00000035283.5	52.3361	0.560033	0.24428	2.29258	0.0218721	0.233092	ENSMUSG00000035283	Adrb1	ADRB1
ENSMUSG00000022512.3	17.2259	1.13659	0.495852	2.2922	0.0218941	0.233198	ENSMUSG00000022512	Cldn1	CLDN1
ENSMUSG00000030036.8	1806.12	-0.34712	0.151503	-2.29118	0.0219532	0.233697	ENSMUSG00000030036	Mogs	MOGS
ENSMUSG00000021680.8	19.3708	-1.29708	0.566187	-2.2909	0.0219693	0.233732	ENSMUSG00000021680	Crhbp	CRHBP
ENSMUSG00000032513.8	892.609	-0.517466	0.225899	-2.2907	0.0219807	0.233732	ENSMUSG00000032513	Gorasp1	GORASP1
ENSMUSG00000053113.3	2329.04	0.491518	0.21465	2.28986	0.0220295	0.234122	ENSMUSG00000053113	Socs3	SOCS3
ENSMUSG00000028699.9	50.2089	-1.6187	0.707062	-2.28934	0.0220597	0.23426	ENSMUSG00000028699	Tspan1	TSPAN1
ENSMUSG00000018126.15	160.819	-1.04811	0.457849	-2.28921	0.0220669	0.23426	ENSMUSG00000018126	Baiap2l2	BAIAP2L2
ENSMUSG00000017677.11	615.533	0.455669	0.199136	2.28823	0.0221243	0.23474	ENSMUSG00000017677	Wsb1	WSB1
ENSMUSG00000033917.15	3150.76	-0.42697	0.186651	-2.28753	0.022165	0.235042	ENSMUSG00000033917	Gde1	GDE1
ENSMUSG00000038302.14	329.898	-0.469556	0.205319	-2.28696	0.0221984	0.235266	ENSMUSG00000038302	Afg1l	AFG1L
ENSMUSG00000004562.16	349.016	0.418579	0.183349	2.28296	0.0224328	0.237489	ENSMUSG00000004562	Arhgef40	ARHGEF40
ENSMUSG00000034271.16	70.4664	0.69355	0.303851	2.28253	0.0224579	0.237623	ENSMUSG00000034271	Jdp2	JDP2
ENSMUSG00000041886.7	24.6659	1.49634	0.656153	2.28047	0.0225797	0.238781	ENSMUSG00000041886	Macc1	MACC1
ENSMUSG00000006315.9	1509.31	-0.436042	0.19124	-2.28008	0.0226029	0.238896	ENSMUSG00000006315	Tmem147	TMEM147
ENSMUSG00000028015.3	1987.61	-0.435323	0.190957	-2.27969	0.022626	0.239008	ENSMUSG00000028015	Ctso	CTSO
ENSMUSG00000001864.13	61.5799	1.05791	0.464182	2.2791	0.0226614	0.23925	ENSMUSG00000001864	Aif1l	AIF1L
ENSMUSG00000056486.18	638.676	-0.444339	0.195129	-2.27716	0.0227769	0.240338	ENSMUSG00000056486	Chn1	CHN1
ENSMUSG00000021810.3	970.801	-0.285026	0.125191	-2.27673	0.0228024	0.240475	ENSMUSG00000021810	Ecd	ECD
ENSMUSG00000029338.13	104.713	0.764645	0.336035	2.27549	0.0228763	0.240838	ENSMUSG00000029338	Antxr2	ANTXR2
ENSMUSG00000035735.10	881.288	-0.593019	0.260617	-2.27544	0.0228795	0.240838	ENSMUSG00000035735	Dagla	DAGLA
ENSMUSG00000040389.15	465.887	0.429471	0.188751	2.27533	0.022886	0.240838	ENSMUSG00000040389	Wdr47	WDR47
ENSMUSG00000050855.16	53.3843	0.639144	0.280903	2.27532	0.0228869	0.240838	ENSMUSG00000050855	Zfp940	ZFP940
ENSMUSG00000011256.16	125.72	1.40902	0.619325	2.27508	0.0229008	0.240853	ENSMUSG00000011256	Adam19	ADAM19
ENSMUSG00000029797.13	39.4339	1.05418	0.46356	2.2741	0.0229602	0.241221	ENSMUSG00000029797	Sspo	SSPO
ENSMUSG00000056220.14	58.6208	1.03063	0.453207	2.27409	0.0229609	0.241221	ENSMUSG00000056220	Pla2g4a	PLA2G4A
ENSMUSG00000075020.6	621.04	-0.837779	0.368467	-2.27369	0.0229849	0.241285	ENSMUSG00000075020	Mir670hg	MIR670HG
ENSMUSG00000106734.3	271.731	0.597568	0.262872	2.27323	0.0230123	0.241366	ENSMUSG00000106734	Gm20559	GM20559
ENSMUSG00000064358.1	34328.3	-0.776167	0.341576	-2.27231	0.0230679	0.241811	ENSMUSG00000064358	mt-Co3	MT-CO3
ENSMUSG00000030752.8	118.568	-0.541357	0.238262	-2.27211	0.0230799	0.241811	ENSMUSG00000030752	Kdm8	KDM8
ENSMUSG00000051041.8	34.394	1.103	0.485639	2.27123	0.0231333	0.242239	ENSMUSG00000051041	Olfml1	OLFML1
ENSMUSG00000025425.18	329.876	-0.548358	0.241475	-2.27087	0.0231547	0.242309	ENSMUSG00000025425	St8sia5	ST8SIA5
ENSMUSG00000083104.1	3.38672	-1.94484	0.856496	-2.2707	0.0231652	0.242309	ENSMUSG00000083104	Gm12917	GM12917
ENSMUSG00000059900.14	13.8275	-0.988104	0.435469	-2.26906	0.0232647	0.243087	ENSMUSG00000059900	Tmem40	TMEM40
ENSMUSG00000062300.14	1217.77	0.551305	0.242966	2.26906	0.0232649	0.243087	ENSMUSG00000062300	Nectin2	NECTIN2
ENSMUSG00000006576.16	1118.21	0.485987	0.214295	2.26784	0.0233392	0.243731	ENSMUSG00000006576	Slc4a3	SLC4A3
ENSMUSG00000110723.1	11.2205	-1.25357	0.552826	-2.26757	0.0233555	0.243769	ENSMUSG00000110723	Gm49353	GM49353
ENSMUSG00000021221.15	71.9372	-0.568021	0.25063	-2.26637	0.0234287	0.2444	ENSMUSG00000021221	Dpf3	DPF3
ENSMUSG00000015961.8	1160.83	0.34833	0.153744	2.26565	0.0234726	0.244465	ENSMUSG00000015961	Adss	ADSS
ENSMUSG00000030889.14	4.75235	2.44506	1.0793	2.26541	0.0234873	0.244465	ENSMUSG00000030889	Vwa3a	VWA3A
ENSMUSG00000063556.5	3.04575	2.47832	1.09406	2.26525	0.0234975	0.244465	ENSMUSG00000063556	Gm10132	GM10132
ENSMUSG00000010051.15	90.1119	0.508765	0.224596	2.26525	0.0234976	0.244465	ENSMUSG00000010051	Hyal1	HYAL1
ENSMUSG00000026308.8	13.9904	1.08016	0.476843	2.26523	0.0234985	0.244465	ENSMUSG00000026308	Klhl30	KLHL30
ENSMUSG00000086171.7	476.376	-0.736608	0.325214	-2.26499	0.0235132	0.244487	ENSMUSG00000086171	Pcsk2os1	PCSK2OS1
ENSMUSG00000085016.1	6.27114	-1.42354	0.628592	-2.26464	0.0235346	0.244577	ENSMUSG00000085016	Gm11335	GM11335
ENSMUSG00000034066.13	288.795	-0.366392	0.161833	-2.26401	0.0235736	0.24485	ENSMUSG00000034066	Farp2	FARP2
ENSMUSG00000097125.2	6.08099	1.65014	0.728928	2.2638	0.0235867	0.244853	ENSMUSG00000097125	Gm26885	GM26885
ENSMUSG00000029660.10	34.7738	-0.813239	0.359352	-2.26307	0.0236313	0.245136	ENSMUSG00000029660	Tex26	TEX26
ENSMUSG00000049092.11	75.3231	0.601651	0.265871	2.26294	0.0236394	0.245136	ENSMUSG00000049092	Gpr137c	GPR137C
ENSMUSG00000057751.14	264.707	1.39571	0.617436	2.2605	0.0237904	0.246569	ENSMUSG00000057751	Megf6	MEGF6
ENSMUSG00000026072.12	8705.02	-0.838534	0.371011	-2.26014	0.0238128	0.246668	ENSMUSG00000026072	Il1r1	IL1R1
ENSMUSG00000073805.5	7.48256	-1.48631	0.657729	-2.25975	0.0238365	0.246781	ENSMUSG00000073805	Insyn2a	INSYN2A
ENSMUSG00000097924.2	96.81	-0.752929	0.333259	-2.25929	0.0238652	0.246945	ENSMUSG00000097924	A730020E08Rik	A730020E08RIK
ENSMUSG00000041930.7	553.977	-0.591212	0.261787	-2.25837	0.0239226	0.24711	ENSMUSG00000041930	Fam222a	FAM222A
ENSMUSG00000040891.6	445.188	-0.471602	0.208839	-2.2582	0.0239329	0.24711	ENSMUSG00000040891	Foxa3	FOXA3
ENSMUSG00000039230.14	2963.2	-0.516027	0.228563	-2.2577	0.0239642	0.24711	ENSMUSG00000039230	Tbcd	TBCD
ENSMUSG00000031385.14	34.8479	0.907891	0.402178	2.25744	0.0239809	0.24711	ENSMUSG00000031385	Plxnb3	PLXNB3
ENSMUSG00000117731.1	27.686	-0.968084	0.428881	-2.25723	0.0239936	0.24711	ENSMUSG00000117731	Gm50145	GM50145
ENSMUSG00000028807.2	271.867	-0.390559	0.17303	-2.25718	0.0239968	0.24711	ENSMUSG00000028807	Zbtb8a	ZBTB8A
ENSMUSG00000067787.10	1404.48	-0.313373	0.138844	-2.25701	0.0240072	0.24711	ENSMUSG00000067787	Blcap	BLCAP
ENSMUSG00000048699.4	35.361	0.859678	0.380893	2.25701	0.0240075	0.24711	ENSMUSG00000048699	Krt90	KRT90
ENSMUSG00000039798.2	6.93842	1.61245	0.714439	2.25694	0.0240117	0.24711	ENSMUSG00000039798	2600006K01Rik	2600006K01RIK
ENSMUSG00000004730.15	97.9877	0.636303	0.28194	2.25687	0.0240161	0.24711	ENSMUSG00000004730	Adgre1	ADGRE1
ENSMUSG00000025255.18	60.2947	0.663239	0.293889	2.25677	0.0240224	0.24711	ENSMUSG00000025255	Zfhx4	ZFHX4
ENSMUSG00000104034.1	15.383	-1.42377	0.63114	-2.25587	0.024079	0.247559	ENSMUSG00000104034	2900092N22Rik	2900092N22RIK
ENSMUSG00000031375.17	1260.04	0.912982	0.405024	2.25414	0.0241871	0.248537	ENSMUSG00000031375	Bgn	BGN
ENSMUSG00000105302.1	4.30967	2.07558	0.92101	2.25359	0.0242221	0.248765	ENSMUSG00000105302	Gm19817	GM19817
ENSMUSG00000031202.5	598.326	-0.415876	0.184595	-2.25291	0.024265	0.249073	ENSMUSG00000031202	Rab39b	RAB39B
ENSMUSG00000105434.1	122.884	-1.05584	0.468785	-2.25229	0.0243043	0.249342	ENSMUSG00000105434	Gm43359	GM43359
ENSMUSG00000060512.7	2399.16	-0.502336	0.223075	-2.25186	0.0243308	0.249374	ENSMUSG00000060512	0610040J01Rik	0610040J01RIK
ENSMUSG00000019978.16	568.483	0.587031	0.260691	2.25183	0.0243332	0.249374	ENSMUSG00000019978	Epb41l2	EPB41L2
ENSMUSG00000068566.12	1533.85	0.366579	0.163033	2.2485	0.0245441	0.2513	ENSMUSG00000068566	Myadm	MYADM
ENSMUSG00000026049.11	298.338	-0.519826	0.231193	-2.24845	0.0245473	0.2513	ENSMUSG00000026049	Tex30	TEX30
ENSMUSG00000025963.5	17.7537	1.05616	0.469943	2.24743	0.0246127	0.251835	ENSMUSG00000025963	Mdh1b	MDH1B
ENSMUSG00000037259.15	456.425	0.45119	0.200804	2.24692	0.0246452	0.252034	ENSMUSG00000037259	Dzank1	DZANK1
ENSMUSG00000040680.9	11.5211	1.11651	0.497006	2.24648	0.0246735	0.252138	ENSMUSG00000040680	Kremen2	KREMEN2
ENSMUSG00000033508.7	23.9547	1.24499	0.554228	2.24635	0.0246816	0.252138	ENSMUSG00000033508	Asprv1	ASPRV1
ENSMUSG00000031070.15	26.9274	1.34952	0.601111	2.24505	0.0247651	0.252857	ENSMUSG00000031070	Mrgprf	MRGPRF
ENSMUSG00000044006.8	4.21391	1.96473	0.875324	2.24457	0.0247957	0.252901	ENSMUSG00000044006	Cilp2	CILP2
ENSMUSG00000044313.13	9.08946	2.14614	0.956415	2.24394	0.0248363	0.25318	ENSMUSG00000044313	Mab21l3	MAB21L3
ENSMUSG00000022853.7	316.937	-0.52041	0.231959	-2.24354	0.0248619	0.253279	ENSMUSG00000022853	Ehhadh	EHHADH
ENSMUSG00000005225.15	365.602	-0.349461	0.155774	-2.24338	0.0248723	0.253279	ENSMUSG00000005225	Plekha8	PLEKHA8
ENSMUSG00000026121.13	353.929	0.471372	0.210223	2.24225	0.0249453	0.253888	ENSMUSG00000026121	Sema4c	SEMA4C
ENSMUSG00000022365.6	3984.4	-0.290532	0.129657	-2.24077	0.0250409	0.254726	ENSMUSG00000022365	Derl1	DERL1
ENSMUSG00000051242.1	18.2529	1.04321	0.465709	2.24004	0.0250881	0.254943	ENSMUSG00000051242	Pcdhb9	PCDHB9
ENSMUSG00000054793.8	608.038	0.532429	0.237709	2.23983	0.0251017	0.254943	ENSMUSG00000054793	Cadm4	CADM4
ENSMUSG00000032898.9	2851.83	-0.355243	0.158608	-2.23976	0.0251067	0.254943	ENSMUSG00000032898	Fbxo21	FBXO21
ENSMUSG00000028541.14	374.791	0.415757	0.185637	2.23962	0.0251153	0.254943	ENSMUSG00000028541	B4galt2	B4GALT2
ENSMUSG00000100029.1	5.60177	-1.79431	0.80126	-2.23936	0.0251324	0.254982	ENSMUSG00000100029	D7Ertd128e	D7ERTD128E
ENSMUSG00000098055.1	18.9963	-0.890162	0.397561	-2.23906	0.0251522	0.255049	ENSMUSG00000098055	Gm26947	GM26947
ENSMUSG00000113109.1	7.67165	-1.68725	0.753714	-2.23858	0.0251834	0.255183	ENSMUSG00000113109	Gm7712	GM7712
ENSMUSG00000053411.16	2141.51	-0.355386	0.158764	-2.23845	0.025192	0.255183	ENSMUSG00000053411	Cbx7	CBX7
ENSMUSG00000055385.12	7.43797	-2.57482	1.15058	-2.23784	0.0252314	0.255448	ENSMUSG00000055385	Rnf212	RNF212
ENSMUSG00000078922.9	109.948	1.05953	0.473535	2.23749	0.0252545	0.255548	ENSMUSG00000078922	Tgtp1	TGTP1
ENSMUSG00000118531.1	7.26309	-2.00786	0.897576	-2.23698	0.0252876	0.255748	ENSMUSG00000118531	Tmigd3	TMIGD3
ENSMUSG00000031654.16	6.43561	1.84947	0.826908	2.23661	0.0253116	0.255748	ENSMUSG00000031654	Cbln1	CBLN1
ENSMUSG00000031364.2	3.46036	-2.72215	1.21715	-2.2365	0.0253193	0.255748	ENSMUSG00000031364	Grpr	GRPR
ENSMUSG00000031351.15	57.6519	0.697497	0.311896	2.23631	0.0253313	0.255748	ENSMUSG00000031351	Zfp185	ZFP185
ENSMUSG00000105704.1	8.34111	-6.7786	3.03135	-2.23617	0.0253408	0.255748	ENSMUSG00000105704	Gm43055	GM43055
ENSMUSG00000063529.3	3.43693	-2.17135	0.971163	-2.23582	0.0253636	0.255792	ENSMUSG00000063529	Stmnd1	STMND1
ENSMUSG00000033530.8	999.042	-0.279352	0.12496	-2.23554	0.0253822	0.255792	ENSMUSG00000033530	Ttc7b	TTC7B
ENSMUSG00000026315.13	28.1816	0.907806	0.406088	2.23549	0.0253851	0.255792	ENSMUSG00000026315	Serpinb8	SERPINB8
ENSMUSG00000043719.14	1512.6	-0.658592	0.294671	-2.23501	0.0254168	0.255978	ENSMUSG00000043719	Col6a6	COL6A6
ENSMUSG00000104868.1	3.31135	3.2161	1.43982	2.23368	0.025504	0.256573	ENSMUSG00000104868	Gm9954	GM9954
ENSMUSG00000037025.11	1969.53	-0.39128	0.175181	-2.23358	0.0255108	0.256573	ENSMUSG00000037025	Foxa2	FOXA2
ENSMUSG00000042747.12	1739.14	-0.468477	0.209756	-2.23343	0.0255204	0.256573	ENSMUSG00000042747	Krtcap2	KRTCAP2
ENSMUSG00000050671.12	7.05104	1.41106	0.631881	2.2331	0.0255422	0.256573	ENSMUSG00000050671	Ism2	ISM2
ENSMUSG00000053626.5	12.7575	1.29259	0.578833	2.2331	0.0255426	0.256573	ENSMUSG00000053626	Tll1	TLL1
ENSMUSG00000115725.1	8.55444	-1.52257	0.681984	-2.23256	0.0255782	0.256784	ENSMUSG00000115725	4930572G02Rik	4930572G02RIK
ENSMUSG00000047990.6	140.79	-0.827641	0.370745	-2.23237	0.0255903	0.256784	ENSMUSG00000047990	C2cd4a	C2CD4A
ENSMUSG00000015750.15	2416.86	-0.339119	0.151975	-2.23141	0.025654	0.257157	ENSMUSG00000015750	Aph1a	APH1A
ENSMUSG00000040370.13	451.764	-0.51643	0.231437	-2.23141	0.0256542	0.257157	ENSMUSG00000040370	Etfrf1	ETFRF1
ENSMUSG00000044456.16	282.765	0.763907	0.342446	2.23074	0.0256986	0.257372	ENSMUSG00000044456	Rin3	RIN3
ENSMUSG00000113940.1	11.6196	1.40579	0.630222	2.23063	0.0257056	0.257372	ENSMUSG00000113940	Gm40477	GM40477
ENSMUSG00000063652.10	55.4938	1.06934	0.479451	2.23035	0.025724	0.257372	ENSMUSG00000063652	Slc22a21	SLC22A21
ENSMUSG00000001865.2	3.7868	2.79928	1.25513	2.23027	0.0257292	0.257372	ENSMUSG00000001865	Cpa3	CPA3
ENSMUSG00000020032.14	649.461	0.483948	0.217017	2.22999	0.0257478	0.257374	ENSMUSG00000020032	Nuak1	NUAK1
ENSMUSG00000022371.16	304.879	0.77978	0.349698	2.22987	0.0257563	0.257374	ENSMUSG00000022371	Col14a1	COL14A1
ENSMUSG00000038756.13	17.4876	1.61218	0.723058	2.22967	0.0257695	0.257374	ENSMUSG00000038756	Ttll6	TTLL6
ENSMUSG00000019785.14	9.94801	1.64887	0.739679	2.22918	0.0258022	0.257434	ENSMUSG00000019785	Clvs2	CLVS2
ENSMUSG00000061451.13	180.245	0.567307	0.254492	2.22918	0.0258022	0.257434	ENSMUSG00000061451	Tmem151a	TMEM151A
ENSMUSG00000032511.17	18.3485	1.3571	0.609006	2.22838	0.0258553	0.25783	ENSMUSG00000032511	Scn5a	SCN5A
ENSMUSG00000086965.1	84.9025	-1.19475	0.536692	-2.22614	0.0260045	0.259183	ENSMUSG00000086965	Rtl10	RTL10
ENSMUSG00000028700.14	1246.73	-0.385424	0.173219	-2.22507	0.0260768	0.25959	ENSMUSG00000028700	Pomgnt1	POMGNT1
ENSMUSG00000025650.13	297.716	-2.02207	0.908821	-2.22494	0.0260852	0.25959	ENSMUSG00000025650	Col7a1	COL7A1
ENSMUSG00000013483.14	5.26601	2.00203	0.899815	2.22493	0.0260858	0.25959	ENSMUSG00000013483	Card14	CARD14
ENSMUSG00000016179.11	160.804	-0.471525	0.211973	-2.22445	0.026118	0.259776	ENSMUSG00000016179	Camk1g	CAMK1G
ENSMUSG00000010601.14	17.6914	-1.83382	0.824542	-2.22404	0.0261454	0.259914	ENSMUSG00000010601	Apol7a	APOL7A
ENSMUSG00000029162.15	1158.22	-0.882261	0.396825	-2.2233	0.0261958	0.26028	ENSMUSG00000029162	Khk	KHK
ENSMUSG00000027429.16	3182.38	-0.454151	0.204311	-2.22284	0.0262267	0.260453	ENSMUSG00000027429	Sec23b	SEC23B
ENSMUSG00000042345.15	28.3568	1.60103	0.720581	2.22186	0.0262925	0.260971	ENSMUSG00000042345	Ubash3a	UBASH3A
ENSMUSG00000031639.12	247.861	0.547189	0.246342	2.22126	0.0263333	0.261241	ENSMUSG00000031639	Tlr3	TLR3
ENSMUSG00000046192.4	7.17783	1.68977	0.760935	2.22065	0.0263748	0.261519	ENSMUSG00000046192	Iqub	IQUB
ENSMUSG00000037405.8	393.579	0.874548	0.393931	2.22005	0.0264153	0.261646	ENSMUSG00000037405	Icam1	ICAM1
ENSMUSG00000057766.14	75.7663	0.804902	0.362564	2.22003	0.026417	0.261646	ENSMUSG00000057766	Ankrd29	ANKRD29
ENSMUSG00000039911.13	387.702	0.347651	0.156617	2.21975	0.026436	0.261646	ENSMUSG00000039911	Spsb1	SPSB1
ENSMUSG00000030103.11	1504.05	0.531733	0.239556	2.21966	0.0264421	0.261646	ENSMUSG00000030103	Bhlhe40	BHLHE40
ENSMUSG00000040950.13	18.4022	1.56961	0.707406	2.21883	0.0264985	0.26207	ENSMUSG00000040950	Mgl2	MGL2
ENSMUSG00000018449.12	167.583	0.466089	0.21011	2.21831	0.0265335	0.262281	ENSMUSG00000018449	Rpain	RPAIN
ENSMUSG00000058135.12	1200.26	-0.473953	0.213757	-2.21725	0.0266058	0.26286	ENSMUSG00000058135	Gstm1	GSTM1
ENSMUSG00000112758.1	12.3734	-1.06091	0.478586	-2.21675	0.0266401	0.263064	ENSMUSG00000112758	Gm36172	GM36172
ENSMUSG00000011257.19	3264.21	-0.607552	0.274118	-2.21639	0.0266646	0.26312	ENSMUSG00000011257	Pabpc4	PABPC4
ENSMUSG00000035811.10	70.4966	2.14041	0.965773	2.21627	0.0266731	0.26312	ENSMUSG00000035811	Ugt2b35	UGT2B35
ENSMUSG00000014905.4	6018.68	-0.563306	0.254224	-2.21579	0.0267061	0.26331	ENSMUSG00000014905	Dnajb9	DNAJB9
ENSMUSG00000074671.6	236.216	0.542208	0.244785	2.21504	0.0267571	0.263679	ENSMUSG00000074671	Tspyl3	TSPYL3
ENSMUSG00000034781.5	3029.85	-0.284008	0.128318	-2.21332	0.0268759	0.264713	ENSMUSG00000034781	Gna11	GNA11
ENSMUSG00000036834.16	272.296	-0.621082	0.28067	-2.21285	0.026908	0.264894	ENSMUSG00000036834	Plch1	PLCH1
ENSMUSG00000103755.1	13.3504	-1.89972	0.85937	-2.21059	0.0270639	0.26616	ENSMUSG00000103755	Gm37805	GM37805
ENSMUSG00000008136.14	76.4038	-0.484979	0.219389	-2.21059	0.0270643	0.26616	ENSMUSG00000008136	Fhl2	FHL2
ENSMUSG00000043614.13	453.248	0.436419	0.19746	2.21016	0.0270942	0.266318	ENSMUSG00000043614	Vps37d	VPS37D
ENSMUSG00000050830.17	15.1996	1.53763	0.695819	2.20981	0.027118	0.266416	ENSMUSG00000050830	Vwc2	VWC2
ENSMUSG00000057193.8	1104.43	0.456757	0.206725	2.2095	0.0271401	0.266497	ENSMUSG00000057193	Slc44a2	SLC44A2
ENSMUSG00000029174.18	1466.39	-0.375369	0.169906	-2.20927	0.0271557	0.266514	ENSMUSG00000029174	Tbc1d1	TBC1D1
ENSMUSG00000021662.11	1032.03	0.4025	0.182226	2.2088	0.0271888	0.266702	ENSMUSG00000021662	Arhgef28	ARHGEF28
ENSMUSG00000043629.12	1120.54	-0.436009	0.197435	-2.20837	0.0272185	0.26679	ENSMUSG00000043629	1700019D03Rik	1700019D03RIK
ENSMUSG00000022125.7	415.798	-0.419251	0.189855	-2.20827	0.0272255	0.26679	ENSMUSG00000022125	Cln5	CLN5
ENSMUSG00000040097.16	2108.29	0.240229	0.108835	2.20727	0.0272949	0.267238	ENSMUSG00000040097	Flywch1	FLYWCH1
ENSMUSG00000021468.8	1053.73	-0.267811	0.121334	-2.20722	0.0272989	0.267238	ENSMUSG00000021468	Sptlc1	SPTLC1
ENSMUSG00000027536.6	1398.53	-0.616842	0.279525	-2.20675	0.0273315	0.267421	ENSMUSG00000027536	Chmp4c	CHMP4C
ENSMUSG00000022054.11	602.053	0.42283	0.191703	2.20565	0.0274088	0.268014	ENSMUSG00000022054	Nefm	NEFM
ENSMUSG00000021994.15	39.6387	1.13532	0.514772	2.20549	0.02742	0.268014	ENSMUSG00000021994	Wnt5a	WNT5A
ENSMUSG00000025892.16	12.5724	1.61657	0.733225	2.20474	0.0274722	0.268387	ENSMUSG00000025892	Gria4	GRIA4
ENSMUSG00000031600.11	2819.12	-0.293894	0.133328	-2.20429	0.0275041	0.268466	ENSMUSG00000031600	Vps37a	VPS37A
ENSMUSG00000074793.10	227.44	-0.592466	0.268786	-2.20423	0.0275081	0.268466	ENSMUSG00000074793	Hspa12b	HSPA12B
ENSMUSG00000038861.14	1157.38	-0.403846	0.183308	-2.2031	0.0275877	0.269059	ENSMUSG00000038861	Pi4kb	PI4KB
ENSMUSG00000042745.9	578.548	0.566869	0.25732	2.20297	0.0275969	0.269059	ENSMUSG00000042745	Id1	ID1
ENSMUSG00000107858.1	9.32512	-2.01724	0.915863	-2.20256	0.0276261	0.269207	ENSMUSG00000107858	Gm43879	GM43879
ENSMUSG00000054945.4	84.3373	-0.625425	0.284032	-2.20195	0.0276685	0.269357	ENSMUSG00000054945	Gm9958	GM9958
ENSMUSG00000044308.17	2510.22	-0.356673	0.161981	-2.20194	0.0276694	0.269357	ENSMUSG00000044308	Ubr3	UBR3
ENSMUSG00000039168.15	6868.23	-0.367984	0.167141	-2.20164	0.027691	0.269431	ENSMUSG00000039168	Dap	DAP
ENSMUSG00000110040.1	3.88912	3.90841	1.77557	2.20122	0.0277204	0.269581	ENSMUSG00000110040	Gm49369	GM49369
ENSMUSG00000001986.16	485.351	0.592218	0.269085	2.20086	0.0277458	0.269589	ENSMUSG00000001986	Gria3	GRIA3
ENSMUSG00000047963.7	266.079	0.771123	0.350381	2.20081	0.0277494	0.269589	ENSMUSG00000047963	Stbd1	STBD1
ENSMUSG00000068699.12	46.2356	1.29301	0.587661	2.20027	0.0277878	0.269826	ENSMUSG00000068699	Flnc	FLNC
ENSMUSG00000048076.14	8687.54	-0.298315	0.135605	-2.19988	0.0278157	0.269961	ENSMUSG00000048076	Arf1	ARF1
ENSMUSG00000028527.18	43.1003	0.731674	0.332652	2.19952	0.0278411	0.270071	ENSMUSG00000028527	Ak4	AK4
ENSMUSG00000053460.8	1465.55	-0.49958	0.227289	-2.198	0.0279494	0.270985	ENSMUSG00000053460	Ggcx	GGCX
ENSMUSG00000027465.13	1520.62	-0.3046	0.13863	-2.19722	0.0280049	0.271387	ENSMUSG00000027465	Tbc1d20	TBC1D20
ENSMUSG00000002496.10	1731.53	-0.320506	0.145957	-2.1959	0.028099	0.272162	ENSMUSG00000002496	Tsc2	TSC2
ENSMUSG00000085636.1	123.319	-0.471669	0.214848	-2.19536	0.0281376	0.272383	ENSMUSG00000085636	Gm11769	GM11769
ENSMUSG00000039349.5	423.517	0.715955	0.326147	2.19519	0.0281502	0.272383	ENSMUSG00000039349	C130074G19Rik	C130074G19RIK
ENSMUSG00000025597.13	29.5766	0.902378	0.411126	2.1949	0.028171	0.272401	ENSMUSG00000025597	Klhl4	KLHL4
ENSMUSG00000000805.18	294.593	0.772857	0.352136	2.19477	0.0281804	0.272401	ENSMUSG00000000805	Car4	CAR4
ENSMUSG00000032733.6	359.474	0.37041	0.168809	2.19426	0.0282169	0.272617	ENSMUSG00000032733	Snx33	SNX33
ENSMUSG00000042178.6	1460.89	-0.353934	0.161369	-2.19332	0.0282843	0.273131	ENSMUSG00000042178	Armc5	ARMC5
ENSMUSG00000029304.14	4680.04	1.16576	0.531581	2.19301	0.0283069	0.273212	ENSMUSG00000029304	Spp1	SPP1
ENSMUSG00000086564.9	5.47152	2.33113	1.06338	2.19218	0.0283668	0.273486	ENSMUSG00000086564	Cd101	CD101
ENSMUSG00000002845.14	1387.54	-0.477223	0.217707	-2.19204	0.0283764	0.273486	ENSMUSG00000002845	Tmem39a	TMEM39A
ENSMUSG00000025510.14	1448.2	0.360201	0.164324	2.19202	0.028378	0.273486	ENSMUSG00000025510	Cd151	CD151
ENSMUSG00000024039.15	1881.64	-0.656533	0.299635	-2.19111	0.028444	0.273764	ENSMUSG00000024039	Cbs	CBS
ENSMUSG00000038855.10	5972.1	-0.337945	0.154244	-2.19098	0.0284535	0.273764	ENSMUSG00000038855	Itpkb	ITPKB
ENSMUSG00000059187.12	118.282	-0.641255	0.292695	-2.19087	0.0284614	0.273764	ENSMUSG00000059187	Tafa1	TAFA1
ENSMUSG00000030963.6	6.66702	-2.56107	1.16899	-2.19083	0.0284637	0.273764	ENSMUSG00000030963	Umod	UMOD
ENSMUSG00000085151.7	274.058	-0.396654	0.1811	-2.19025	0.0285063	0.273979	ENSMUSG00000085151	1110018N20Rik	1110018N20RIK
ENSMUSG00000022150.16	126.967	0.53996	0.246542	2.19013	0.0285146	0.273979	ENSMUSG00000022150	Dab2	DAB2
ENSMUSG00000026585.13	993.737	0.308716	0.141011	2.1893	0.0285753	0.274425	ENSMUSG00000026585	Kifap3	KIFAP3
ENSMUSG00000038486.9	3462.72	-0.407327	0.186127	-2.18843	0.0286382	0.274726	ENSMUSG00000038486	Sv2a	SV2A
ENSMUSG00000042626.13	2824.33	-0.296392	0.135442	-2.18834	0.028645	0.274726	ENSMUSG00000042626	Shc1	SHC1
ENSMUSG00000048779.5	48.7598	0.862937	0.394345	2.18828	0.0286494	0.274726	ENSMUSG00000048779	P2ry6	P2RY6
ENSMUSG00000062480.12	4.5921	-3.50528	1.60209	-2.18794	0.0286739	0.274824	ENSMUSG00000062480	Acat3	ACAT3
ENSMUSG00000030342.8	1078.39	0.68399	0.312735	2.18712	0.0287337	0.27526	ENSMUSG00000030342	Cd9	CD9
ENSMUSG00000027341.10	693.514	-0.386052	0.176598	-2.18605	0.0288118	0.275871	ENSMUSG00000027341	Tmem230	TMEM230
ENSMUSG00000075014.1	16.3525	-1.55993	0.713685	-2.18574	0.0288349	0.275955	ENSMUSG00000075014	Gm10800	GM10800
ENSMUSG00000111131.1	4.98187	-1.57257	0.72021	-2.18349	0.029	0.277318	ENSMUSG00000111131	9930024M15Rik	9930024M15RIK
ENSMUSG00000049176.16	13.4767	1.02997	0.471726	2.1834	0.0290063	0.277318	ENSMUSG00000049176	Frmpd4	FRMPD4
ENSMUSG00000103726.1	32.9342	-0.993012	0.454895	-2.18295	0.0290398	0.277501	ENSMUSG00000103726	Gm30074	GM30074
ENSMUSG00000027669.14	343.742	0.542084	0.248402	2.18228	0.0290887	0.277722	ENSMUSG00000027669	Gnb4	GNB4
ENSMUSG00000028778.15	22.5678	1.53725	0.704435	2.18224	0.0290918	0.277722	ENSMUSG00000028778	Hcrtr1	HCRTR1
ENSMUSG00000040624.18	71.0488	0.885584	0.406056	2.18094	0.0291878	0.278293	ENSMUSG00000040624	Plekhg1	PLEKHG1
ENSMUSG00000079164.8	20.2073	0.944962	0.433318	2.18076	0.0292012	0.278293	ENSMUSG00000079164	Tlr5	TLR5
ENSMUSG00000009216.7	4.10433	2.1545	0.988007	2.18065	0.0292094	0.278293	ENSMUSG00000009216	Fam163b	FAM163B
ENSMUSG00000033998.9	866.376	0.390806	0.179215	2.18065	0.0292095	0.278293	ENSMUSG00000033998	Kcnk1	KCNK1
ENSMUSG00000063605.5	66.9086	0.775871	0.355909	2.17997	0.0292597	0.278634	ENSMUSG00000063605	Ccdc102a	CCDC102A
ENSMUSG00000028709.3	643.338	-0.311161	0.142789	-2.17916	0.0293196	0.279066	ENSMUSG00000028709	Mob3c	MOB3C
ENSMUSG00000025584.17	864.623	-0.522547	0.239865	-2.1785	0.0293688	0.279346	ENSMUSG00000025584	Pde8a	PDE8A
ENSMUSG00000100005.7	6.37734	1.83224	0.841105	2.17837	0.0293781	0.279346	ENSMUSG00000100005	B130024G19Rik	B130024G19RIK
ENSMUSG00000026058.11	26.6936	0.827727	0.380118	2.17755	0.0294394	0.279791	ENSMUSG00000026058	Khdrbs2	KHDRBS2
ENSMUSG00000051726.6	54.6862	-1.27986	0.587847	-2.17721	0.0294653	0.279873	ENSMUSG00000051726	Kcnf1	KCNF1
ENSMUSG00000020882.17	429.981	0.391611	0.179895	2.17688	0.0294894	0.279873	ENSMUSG00000020882	Cacnb1	CACNB1
ENSMUSG00000075229.11	194.963	-0.490061	0.225124	-2.17685	0.0294917	0.279873	ENSMUSG00000075229	Ccdc58	CCDC58
ENSMUSG00000038539.15	4352.62	-0.651035	0.299307	-2.17514	0.0296196	0.280863	ENSMUSG00000038539	Atf5	ATF5
ENSMUSG00000104672.1	7.3595	-1.39269	0.64037	-2.17481	0.0296441	0.280863	ENSMUSG00000104672	Gm43665	GM43665
ENSMUSG00000031163.2	21.213	-2.11936	0.974614	-2.17456	0.029663	0.280863	ENSMUSG00000031163	Glod5	GLOD5
ENSMUSG00000027422.15	8126.89	-0.484351	0.222778	-2.17414	0.0296946	0.280863	ENSMUSG00000027422	Rrbp1	RRBP1
ENSMUSG00000083012.9	29.2855	-1.17479	0.540381	-2.17401	0.0297046	0.280863	ENSMUSG00000083012	Fam220a	FAM220A
ENSMUSG00000059654.7	24320	-1.50067	0.690296	-2.17395	0.029709	0.280863	ENSMUSG00000059654	Reg1	REG1
[truncated: 17,042 more rows]

## Sheet: Mienturnet_enrichmentresults
Supplemental Table 5. Mienturnet Enrichment results TargetScan
Seed	miRNA family	p-value	FDR	Odd ratio	Number of interactions	Target Gene 1	Target Gene 2	Target Gene 3	Target Gene 4	Target Gene 5	Target Gene 6	Target Gene 7	Target Gene 8	Target Gene 9	Target Gene 10	Target Gene 11	Target Gene 12	Target Gene 13	Target Gene 14	Target Gene 15	Target Gene 16	Target Gene 17	Target Gene 18	Target Gene 19	Target Gene 20	Target Gene 21	Target Gene 22	Target Gene 23	Target Gene 24	Target Gene 25	Target Gene 26	Target Gene 27	Target Gene 28	Target Gene 29	Target Gene 30	Target Gene 31	Target Gene 32	Target Gene 33	Target Gene 34
CCCUGAG	mmu-miR-125a-5p/mmu-miR-125b-5p/mmu-miR-351-5p/mmu-miR-6367/mmu-miR-6394	0.000339423	0.0675451	0.520206	31	Ggt7	Lrrc10b	Sstr3	Gga2	Neu1	Galnt14	Phactr3	Pctp	Qsox2	Eif4ebp1	Kcnb1	Rab3d	Tmed9	Cpm	Hcn4	Ppp1r37	Esyt1	Coro2b	Kcnj12	Atl2	Svip	Cln6	Asic1	Elovl2	Siah2	Pyroxd2	Glp1r	Kctd15	Lypla2	Sox12	Gcgr
GGAAGAC	mmu-miR-7a-5p/mmu-miR-7b-5p	0.00908458	0.903916	0.541147	18	Ggt7	Pax6	Tmed9	Hadh	Lss	Slc22a23	Kcnb1	Prkcb	Mbd2	Foxo6	Trp53inp2	Adh1	Socs2	Gga2	Hcn4	Klf9	Npepl1	Chpt1
AAAGAAU	mmu-miR-186-5p	0.395431	0.998959	0.916164	16	Phf21b	Egfr	Mcfd2	Jph3	Eif4e3	Prkar2b	Klf9	Slc22a23	Amigo2	Diras2	Insm1	Mpp3	Kdelr1	Phactr3	Cntnap2	Lrrc10b
AAAGCAC	mmu-miR-330-3p.2	0.940943	0.998959	1.5097	10	Tram1	Adipor1	Gatm	Nars2	Ube3c	Pcsk9	Siah2	Mpp3	Syt2	Ttc28
AAAGCUG	mmu-miR-320-3p	0.625976	0.998959	1.06111	12	Elovl2	Esyt1	Adipor1	Brap	Ina	Gns	Plk3	Gjd2	Qsox2	Ftl1	Cnot4	Fancf
AAAGUGC	mmu-miR-106a-5p/mmu-miR-106b-5p/mmu-miR-17-5p/mmu-miR-20a-5p/mmu-miR-20b-5p/mmu-miR-6383/mmu-miR-93-5p	0.869392	0.998959	1.25697	17	Kcnb1	Bhlhe41	Slc40a1	Slc22a23	Camk2n1	Ube3c	Rnf128	Papola	Coro2b	Josd1	Trp53inp2	Klf9	Ldlr	Nkx2-2	Siah2	Slc25a44	Parp6
AACAAAC	mmu-miR-1192/mmu-miR-495-3p	0.891589	0.998959	1.36379	11	Josd1	F2	Kdm2b	Cited2	Camk2n1	Kcng3	Prkcb	Nmt2	R3hdm2	Tmed9	Bhlhe41
AACACUG	mmu-miR-141-3p/mmu-miR-200a-3p	0.648737	0.998959	1.07428	14	Tmem135	Mnx1	Tmed9	Harbi1	Egfr	Tram1	Kdm2b	Ttyh2	Tox3	Bmp1	Svil	Mcoln3	Eif4ebp1	Kcng3
AACAGUC	mmu-miR-132-3p/mmu-miR-212-3p	0.900083	0.998959	1.57833	5	Papola	Kcnj12	B3gat2	Cited2	Cerk
AACAUUC	mmu-miR-543-3p	0.375511	0.998959	0.891512	13	Nudt5	Fam76a	Eif4e3	Prkar2b	Lmo1	Kcng3	Hspa12a	Nmt2	Kcnj12	Bhlhe41	Atl2	Fer1l6	Gm4791
AACCUGG	mmu-miR-490-3p	0.0388493	0.998959	0.478931	8	Papola	Rnf115	Hspa12a	Camk2n1	Paxip1	Ggt7	Fam76a	B3gat2
AAGGCAC	mmu-miR-124-3p.1	0.785683	0.998959	1.13313	27	Vamp3	Gga2	Ppp1r3d	Rnpepl1	Pard3	Kcnj12	Hadh	Trp53inp2	Papss2	Svil	Gch1	Tshz1	Rab3d	Svip	Kcng3	Ggt7	Slc29a1	Neurod1	Rnf128	Fras1	Sox12	Aldh9a1	Phactr3	Fam174b	Fam76a	Insm1	Hepacam2
AAGGUGC	mmu-miR-18a-5p/mmu-miR-18b-5p	0.95073	0.998959	2.34462	2	Camk2n1	D030025P21Rik
AAGUCAC	mmu-miR-224-5p	0.520804	0.998959	0.969435	7	Pctp	Vwa5b1	Pcsk9	Gch1	Syt2	Papola	Otub2
AAGUGCU	mmu-miR-291a-3p/mmu-miR-294-3p/mmu-miR-295-3p/mmu-miR-302a-3p/mmu-miR-302b-3p/mmu-miR-302d-3p	0.495568	0.998959	0.973429	15	Slc22a23	Kcnb1	Camk2n1	Josd1	Slc40a1	Trp53inp2	Neurod1	Tox3	Papola	6430571L13Rik	Mbd2	Coro2b	Sirpa	Pxmp4	Parp6
AAGUUGU	mmu-miR-382-5p	0.57815	0.998959	1.01028	4	Mlxipl	Abcb10	Sirpa	Cxxc4
AAUACUG	mmu-miR-200b-3p/mmu-miR-200c-3p/mmu-miR-429-3p	0.395911	0.998959	0.929496	21	Phactr3	Rims3	Tbc1d22b	Cited2	Cnot4	Rab37	Prkar2b	R3hdm2	Atl2	Kctd15	Krt80	Fam217b	Klf9	Bhlhe41	Sox12	Kcnb1	Desi1	Grip1	Papola	Trp53inp2	Phf21b
AAUCUCA	mmu-miR-216a-5p	0.561733	0.998959	1.00393	6	Adipor1	Krt80	Cux2	Cnot4	Fer1l6	Cxxc4
AAUCUCU	mmu-miR-216b-5p	0.821914	0.998959	1.41535	4	Cux2	Asb11	Nme6	Cxxc4
AAUGCCC	mmu-miR-365-3p	0.444198	0.998959	0.889557	6	Tram1	Pax6	Grip1	Eif4e3	Slc22a23	Plk3
AAUGUUG	mmu-miR-409-3p	0.214496	0.998959	0.694399	7	Bpnt1	Rars2	Cited2	Trp53inp2	Phactr3	Glp1r	Parp6
ACACACC	mmu-miR-329-3p/mmu-miR-362-3p	0.980129	0.998959	2.86882	2	Trp53inp2	Tmed9
ACAGUAC	mmu-miR-101a-3p.1	0.98069	0.998959	1.82041	8	Tspan5	Phactr3	Socs2	Fam217b	Asic1	Cxxc4	Neurod1	Sult1d1
ACAGUAU	mmu-miR-144-3p	0.98381	0.998959	1.79818	9	Socs2	Tspan5	Cxxc4	Neurod1	B3gat2	Phactr3	Egfr	Trp53inp2	Mcf2l
ACAUAGA	mmu-miR-376c-3p	0.595406	0.998959	1.03697	5	Adipor1	Grip1	Tmem135	B3gat2	Glp1r
ACAUUAC	mmu-miR-323-3p	0.765429	0.998959	1.23358	7	Jph3	Nudt5	Adipor1	Slc22a23	Kcng3	Kcnb1	Hspa12a
ACAUUCA	mmu-miR-181a-5p/mmu-miR-181b-5p/mmu-miR-181c-5p/mmu-miR-181d-5p	0.969694	0.998959	1.52359	14	Ttc39a	Mnx1	Cntnap2	Rims3	Bhlhe41	Nmt2	Socs2	Elovl2	Nudt5	Lmo1	Ube3c	Gm4791	Rnf182	Siah2
ACCACAG	mmu-miR-140-3p.2/mmu-miR-497b	0.353823	0.998959	0.847197	9	Sox12	Nqo1	Neu1	Glul	Atl2	Glp1r	Syt2	Sirpa	G6pc2
ACCCGUA	mmu-miR-100-5p/mmu-miR-99a-5p/mmu-miR-99b-5p	0.260947	0.998959	0.49561	2	Ttc39a	Insm1
ACCCUGU	mmu-miR-10a-5p/mmu-miR-10b-5p	0.978025	0.998959	2.81163	2	Prrt3	Tram1
ACUAGAU	mmu-miR-28a-3p	0.724441	0.998959	1.26762	2	Bhlhe41	Sytl4
ACUCCUC	mmu-miR-483-3p.1	0.554903	0.998959	0.924504	2	Ggt7	Phactr3
ACUGCAU	mmu-miR-217-5p	0.438374	0.998959	0.905442	8	Tmem135	Eif4e3	Rab37	Tmed9	Cnot4	Neurod1	Kdm2b	B3gat2
ACUGGCC	mmu-miR-193a-3p/mmu-miR-193b-3p	0.939257	0.998959	2.22072	2	Fhdc1	Cxxc4
ACUGUUU	mmu-miR-452-5p	0.833242	0.998959	1.39915	5	Prkar2b	Adra2a	B3gat2	Mnx1	Cxxc4
AGAUCAG	mmu-miR-383-5p.2	0.87892	0.998959	1.80135	2	Syt2	Vipas39
AGCACCA	mmu-miR-29a-3p/mmu-miR-29b-3p/mmu-miR-29c-3p	0.101065	0.998959	0.769809	26	Dnmt3b	Ina	Svil	Iffo1	Grip1	Fras1	Kctd15	Slc25a44	Sox12	Josd1	Ttyh2	Vamp3	Kcnj12	Tmed9	Emid1	Impdh1	Syt2	Insig1	Ppp1r3d	Rnpepl1	Tmem167	Gjd2	Asic1	Otub2	Eva1b	Mfap5
AGCAGCA	mmu-miR-15a-5p/mmu-miR-15b-5p/mmu-miR-16-5p/mmu-miR-1907/mmu-miR-195a-5p/mmu-miR-195b/mmu-miR-322-5p/mmu-miR-497a-5p/mmu-miR-6342/mmu-miR-6353/mmu-miR-6419	0.965761	0.998959	1.48556	15	Tram1	Tspan5	Gga2	Mlycd	Rab3d	Slc22a23	Rims3	Tmem135	Krt80	Glp1r	Ubxn10	Desi1	Tmem167	Bhlhe41	Chpt1
AGCAGCG	mmu-miR-503-5p	0.944836	0.998959	2.2779	2	Tram1	Bhlhe41
AGCCCUU	mmu-miR-129-1-3p/mmu-miR-129-2-3p	0.841322	0.998959	1.38199	6	Camk2n1	Rims3	Syt2	Elovl2	Kcnb1	Tbc1d22b
AGCUGCC	mmu-miR-22-3p	0.819299	0.998959	1.31527	7	Nudt5	Gatm	Camk2n1	Socs2	Ftl1	Flad1	Sytl4
AGCUUAU	mmu-miR-21a-5p/mmu-miR-21c/mmu-miR-590-5p	0.980786	0.998959	2.88788	2	Rtkn2	Kdm2b
AGGACAC	mmu-miR-1197-3p	0.808992	0.998959	1.436	3	Eif4e3	Fhdc1	Slc29a1
AGGAGCU	mmu-miR-28a-5p/mmu-miR-708-5p	0.719209	0.998959	1.23267	3	Asns	Impdh1	Slc29a1
AGGGUUG	mmu-miR-296-3p	0.1489	0.998959	0.444778	3	Ggt7	Mt2	Desi1
AGGUAGU	mmu-miR-196a-5p/mmu-miR-196b-5p	0.938736	0.998959	1.97609	3	Tox3	Sox12	Cpm
AGGUCAC	mmu-miR-1193-3p/mmu-miR-370-5p	0.630485	0.998959	1.07891	5	Hs1bp3	Klf9	Kcnb1	Car15	Fer1l6
AGGUUAU	mmu-miR-154-5p	0.524733	0.998959	0.921327	3	Adipor1	Harbi1	Cnot4
AGUAGAC	mmu-miR-411-5p/mmu-miR-7229-5p	0.554903	0.998959	0.924504	2	Nudt5	Mnx1
AGUGCAA	mmu-miR-130a-3p/mmu-miR-130b-3p/mmu-miR-130c/mmu-miR-301a-3p/mmu-miR-301b-3p/mmu-miR-6341/mmu-miR-6389/mmu-miR-721	0.902054	0.998959	1.38459	11	Npepl1	Bhlhe41	Tshz1	Neurod1	Klhdc8a	Impdh1	Slc25a44	Tram1	Mbd2	Rnpepl1	Socs2
AGUGCUU	mmu-miR-302c-3p	0.556659	0.998959	1.00838	10	Kcnb1	Slc22a23	Tram1	Camk2n1	B3gat2	Hcn4	Mbd2	Papola	Sirpa	Vamp3
AGUGGUU	mmu-miR-140-5p/mmu-miR-876-3p	0.294482	0.998959	0.786305	8	Klf9	Camk2n1	Tbc1d22b	Ttyh2	Creb3l1	Mcoln3	Fras1	Mpp3
AUAAAGU	mmu-miR-142a-5p	0.947261	0.998959	1.50416	11	Bhlhe41	Slc22a23	Kcnb1	Cntnap2	Ube3c	Rnf128	Mbd2	Eif4e3	Syt2	Rars2	Fam217b
AUAAUAC	mmu-miR-369-3p	0.998959	0.998959	3.62812	3	Paxip1	Pax6	Desi1
AUACAAG	mmu-miR-381-3p/mmu-miR-539-3p	0.900273	0.998959	1.40105	10	Elovl2	Jph3	4833439L19Rik	Insig1	R3hdm2	Kctd15	Cux2	Mnx1	Papola	Cxxc4
AUACCUC	mmu-miR-875-5p	0.576916	0.998959	0.962628	2	Wdr45b	B3gat2
AUAUAAC	mmu-miR-344d-3p/mmu-miR-344e-3p/mmu-miR-410-3p	0.971576	0.998959	1.87442	6	Ldlr	Prkar2b	Camk2n1	Bhlhe41	Syt2	Mnx1
AUCAUUC	mmu-miR-382-3p	0.592969	0.998959	1.02934	4	Eif4ebp1	Pax6	Bhlhe41	Rnf128
AUCCUUG	mmu-miR-362-5p/mmu-miR-500-5p	0.501161	0.998959	0.889557	3	B3gat2	Flad1	Tmem167
AUGCCUU	mmu-miR-532-5p/mmu-miR-6339/mmu-miR-6386	0.78653	0.998959	1.37881	3	Nudt5	Camk2n1	Tmem167
AUGGCAC	mmu-miR-183-5p	0.821741	0.998959	1.34387	6	Slc22a23	Gjd2	Tram1	Atl2	Kctd15	Pctp
AUGGCUU	mmu-miR-135a-5p/mmu-miR-135b-5p	0.155539	0.998959	0.770949	18	Syt2	Kcnb1	Kcnab3	Josd1	Cux2	Elovl2	Desi1	Diras2	Pard3	Wdr45b	Adra2a	Fam210b	Tram1	Fancf	Kcng3	Rars2	Asns	Otub2
AUGUAAC	mmu-miR-379-3p/mmu-miR-411-3p	0.520448	0.998959	0.962628	6	Tram1	Kdm2b	Kcnb1	Tshz1	Tmed9	Sox12
AUGUGCC	mmu-miR-455-5p/mmu-miR-5129-3p	0.816025	0.998959	1.45506	3	R3hdm2	Wdr45b	Kctd15
AUGUGGG	mmu-miR-299a-3p/mmu-miR-299b-3p	0.462272	0.998959	0.838725	3	Paxip1	Por	Lrrc10b
AUUGCAC	mmu-miR-25-3p/mmu-miR-32-5p/mmu-miR-363-3p/mmu-miR-367-3p/mmu-miR-92a-3p/mmu-miR-92b-3p	0.93992	0.998959	1.4799	11	Pkdcc	Josd1	Pcsk9	Ppp1r37	Ttc28	Prkar2b	Pard3	Desi1	Syt2	Insig1	Bhlhe41
CAAAGCA	mmu-miR-330-3p.1/mmu-miR-6240	0.932945	0.998959	1.4591	11	Pxmp4	Jph3	Ldlr	Azgp1	Fras1	Adra2a	Klf9	Diras2	B3gat2	Rims3	Papola
CAAGAGC	mmu-miR-335-5p	0.956733	0.998959	2.42087	2	Kdm2b	Kdelr1
CACAGUG	mmu-miR-128-3p/mmu-miR-6539	0.435763	0.998959	0.951364	22	Ttc39a	Car10	Hcn4	Gns	Syt2	Adora2b	Slc22a23	Klhdc8a	Tbc1d22b	Sec61a1	Cited2	Insm1	Diras2	Trabd	Ttc28	Josd1	Rims3	Lrrc10b	Mcf2l	Cplx3	Acad12	Nme6
CACCUCC	mmu-miR-1306-5p	0.668753	0.998959	1.13418	4	Fras1	Mbd2	Bhlhe41	Desi1
CACUCCU	mmu-miR-483-3p.2	0.16187	0.998959	0.57567	5	Egfr	Hcn4	Ttc39a	Vipas39	Phactr3
CAGGAAC	mmu-miR-6370/mmu-miR-7220-3p/mmu-miR-873a-5p.1	0.0876291	0.998959	0.611888	10	Mlxipl	Gcgr	Rnpepl1	Neurod1	Cplx3	Tshz1	Harbi1	Bhlhe41	Cntnap2	Otub2
CAGUAAC	mmu-miR-802-5p	0.729148	0.998959	1.21234	5	Car10	Tmed9	Neurod1	Nmt2	Glul
CAGUAGU	mmu-miR-199a-3p/mmu-miR-199b-3p	0.794653	0.998959	1.29621	6	Vamp3	Pon2	Cited2	Mcfd2	Slc7a5	B3gat2
CAGUCCA	mmu-miR-455-3p.1	0.365721	0.998959	0.845873	8	Sox12	Vwa5b1	Camk2n1	Otub2	Pax6	Tox3	Parp6	Josd1
CAGUGCA	mmu-miR-148a-3p/mmu-miR-148b-3p/mmu-miR-152-3p	0.931141	0.998959	1.54163	8	Npepl1	Kdm2b	Jph3	Slc25a44	Rnpepl1	Gjd2	Cdh7	Cxxc4
CCACAGG	mmu-miR-140-3p.1	0.908582	0.998959	1.50862	7	Sec61a1	Sox12	Fam174b	Naga	Glp1r	Prkcb	Por
CCAGCAU	mmu-miR-338-3p	0.284968	0.998959	0.792129	9	Vipas39	Hspa12a	Pigo	Ttc39a	Vamp3	Eif4e3	Neurod1	Flad1	G6pc2
CCAGGAG	mmu-miR-665-3p	0.111312	0.998959	0.658503	11	Wdr45b	Pla2g2f	Asb11	Coro2b	Sstr3	Rab37	Glp1r	Syt2	Impdh1	Slc29a1	Pkdcc
CCAGUGU	mmu-miR-199a-5p/mmu-miR-199b-5p	0.39574	0.998959	0.894178	11	Tspan5	Ppp1r1a	Jph3	Tox3	Brap	Tmem135	Phf21b	Desi1	Hspa12a	Pi4ka	Slc25a44
CCCCUGG	mmu-miR-331-3p	0.742479	0.998959	1.25332	4	Slc18a1	Mslnl	Rab37	Adora1
CCCUGUC	mmu-miR-339-5p	0.527985	0.998959	0.948331	4	Josd1	Adra2a	Rims3	Glp1r
CCUGUAC	mmu-miR-486a-5p/mmu-miR-486b-5p	0.529374	0.998959	0.927681	3	B3gat2	Cdh7	Sox12
CCUUCAU	mmu-miR-205-5p	0.957129	0.998959	1.84901	5	Klf9	Ffar1	Flad1	Ttc28	Slc25a44
CCUUGGC	mmu-miR-212-5p	0.973312	0.998959	2.33826	3	Kdm2b	Bhlhe41	Flad1
CUACAGU	mmu-miR-139-5p	0.620494	0.998959	1.06475	7	Kctd15	Cplx3	Atl2	Tmem167	Socs2	Egfr	Tspan5
CUCAAAC	mmu-miR-290a-5p/mmu-miR-292a-5p/mmu-miR-293-5p	0.776324	0.998959	1.28859	5	Hadh	Neurod1	Cerk	Siah2	R3hdm2
CUCACAC	mmu-miR-342-3p	0.963259	0.998959	2.51617	2	Nkx2-2	Rtkn2
CUCCCAA	mmu-miR-150-5p/mmu-miR-5127	0.986982	0.998959	3.10709	2	Adora1	B3galt5
CUCCCAC	mmu-miR-532-3p	0.800926	0.998959	1.36769	4	Neu1	Hspa12a	Glp1r	Sox12
CUCUAGC	mmu-miR-1251-5p	0.543145	0.998959	0.946743	3	Phf21b	Brap	Glp1r
CUCUGGG	mmu-miR-326-3p/mmu-miR-330-5p	0.430238	0.998959	0.913067	10	Ggt7	Pla2g2f	Hpgds	Coro2b	Sstr3	Hspa12a	Mpp3	Ubxn10	Syt2	Sox12
CUGGACU	mmu-miR-378a-3p/mmu-miR-378c	0.134591	0.998959	0.607259	7	Neurod1	Hspa12a	Nmt2	Mpp3	R3hdm2	Nme6	Papola
CUGGCUC	mmu-miR-149-5p	0.443738	0.998959	0.917091	9	Josd1	Kdm2b	Cln6	Tmem135	Rab37	Cntnap2	Syt2	Flad1	Pkdcc
CUGGCUG	mmu-miR-3064-5p/mmu-miR-3085-3p	0.0927262	0.998959	0.675337	14	Josd1	Tmem135	Trp53inp2	Gpr119	Adora1	Mpp3	Ubxn10	Car10	Kctd15	Cntnap2	Syt2	Tmem167	Lrrc10b	Sox12
CUUGUUA	mmu-miR-544-5p	0.355693	0.998959	0.806955	6	Phf21b	Rars2	Eif4e3	Slc22a23	Pcsk9	Rtkn2
CUUUGGU	mmu-miR-9-5p	0.590961	0.998959	1.02934	23	Ube3c	Esyt1	Tram1	Vamp3	Kcnb1	Asic1	Gch1	Atl2	Rims3	Mpp3	Nmt2	Gjd2	Prrt3	Ttyh2	Kcng3	Rnf128	Insig1	Slc22a23	Eif4e3	Slc2a2	9130230L23Rik	Amigo2	Bhlhe41
GAAACAU	mmu-miR-494-3p	0.974237	0.998959	2.0015	5	4833439L19Rik	Dusp23	Lmo1	Prkcb	Cxxc4
GAAAUGU	mmu-miR-203-3p.1	0.773137	0.998959	1.34704	3	Josd1	Insig1	Dnmt3b
GAAGGUC	mmu-miR-493-3p	0.325073	0.998959	0.719588	4	Kdm2b	B3gat2	Fam174b	Slc25a44
GAAUUGU	mmu-miR-219a-2-3p	0.828749	0.998959	1.58214	2	Cerk	Chpt1
GAGAACU	mmu-miR-146a-5p/mmu-miR-146b-5p	0.481079	0.998959	0.924504	6	Kdm2b	Siah2	Kctd15	Cxxc4	Cln6	Ceacam1
GAGAUGA	mmu-miR-143-3p	0.721378	0.998959	1.17639	7	Gns	Kcnb1	Svil	Gga2	Kcnj12	Coro2b	Slc25a44
GAGGCUG	mmu-miR-1962/mmu-miR-485-5p	0.30028	0.998959	0.815851	10	Naga	Dusp23	Vamp3	Slc22a23	Ttyh2	Ninj1	Syt2	Ttc28	Slc25a44	Sox12
GAGGGGC	mmu-miR-423-5p/mmu-miR-6921-5p	0.227739	0.998959	0.683053	6	Cyp4f39	Adora1	Ceacam1	Eva1b	D030025P21Rik	Sox12
GAGGUAG	mmu-let-7a-5p/mmu-let-7b-5p/mmu-let-7c-5p/mmu-let-7d-5p/mmu-let-7e-5p/mmu-let-7f-5p/mmu-let-7g-5p/mmu-let-7i-5p/mmu-let-7k/mmu-miR-1961/mmu-miR-98-5p	0.824284	0.998959	1.20651	17	Fras1	Slc22a23	Npepl1	Syt2	Klf9	Cpm	Nme6	Gatm	Tspan5	Trabd	Mbd2	Slc2a2	Tmem167	Kcng3	Lrfn4	Tmem231	Ubxn10
GAGUAUU	mmu-miR-496a-3p.1	0.0317152	0.998959	0.430255	7	Gcgr	Nudt5	Hcn4	Polr2j	Rims3	Pax6	Parp6
GAUAUGU	mmu-miR-190a-5p/mmu-miR-190b-5p	0.0583409	0.998959	0.492887	7	Kcnb1	Pax6	Neurod1	Phf21b	Nkx6-1	Kcng3	Cxxc4
GAUCAGA	mmu-miR-383-5p.1	0.191761	0.998959	0.644929	6	Lss	Tmed9	Trp53inp2	Neurod1	Tshz1	Syt2
GAUUGUC	mmu-miR-219a-5p	0.751628	0.998959	1.22949	6	Cxxc4	Fam210b	Atl2	Insig1	Klf9	Uox
GCAGCAU	mmu-miR-103-3p/mmu-miR-107-3p	0.795048	0.998959	1.23331	10	Nudt5	Gns	Tram1	Rims3	Coro2b	Tspan5	Gga2	Rtkn2	Iffo1	Jph3
GCAGGAA	mmu-miR-6901-5p/mmu-miR-873a-5p.2	0.261629	0.998959	0.785352	10	Eif4e3	Pcsk9	Camk2n1	Kcng3	Diras2	Tshz1	Hamp2	Nmt2	Parp6	Slc25a44
GCAUCCC	mmu-miR-324-5p	0.0486235	0.998959	0.438424	6	Ggt7	Gga2	6430571L13Rik	Trp53inp2	Rab37	Fhdc1
GCCUGUC	mmu-miR-214-5p	0.873242	0.998959	1.77276	2	Bhlhe41	Slc29a1
GCGGGGC	mmu-miR-744-5p	0.246765	0.998959	0.476548	2	Eva1b	Sox12
GCUACAU	mmu-miR-1928/mmu-miR-221-3p/mmu-miR-222-3p	0.242961	0.998959	0.770102	10	Rims3	Galnt18	Adipor1	Tbc1d22b	Pkdcc	Slc2a2	Eif4e3	Rfk	Ttc28	Ina
GCUGGUG	mmu-miR-138-5p	0.543475	0.998959	1.00075	12	Sox12	Eif4ebp1	Josd1	Trp53inp2	Neurod1	Vstm2l	Tram1	Ina	Rims3	Camk2n1	Kctd15	Azgp1
GGAAUGU	mmu-miR-1957b/mmu-miR-1a-3p/mmu-miR-206-3p/mmu-miR-6349/mmu-miR-6382	0.642642	0.998959	1.07187	13	Josd1	Bpnt1	Cited2	Tmem135	Sec61a1	Pi4ka	Nmt2	Fras1	Fam210b	Gch1	Dcaf12l1	Ninj1	Galr1
GGAGAGA	mmu-miR-185-5p/mmu-miR-3473a/mmu-miR-882	0.365721	0.998959	0.845873	8	Slc22a23	Tmem135	Coro2b	Adora1	Car10	Tox3	Glp1r	Lrrc10b
GGAGUGU	mmu-miR-122-5p	0.781253	0.998959	1.36611	3	Papola	Vamp3	Bhlhe41
GGAUUUC	mmu-miR-876-5p	0.372724	0.998959	0.82284	6	Rfk	Klhdc8a	Ttc39a	Pax6	Rtkn2	Sox12
GGCAAGA	mmu-miR-31-5p	0.902326	0.998959	1.58595	5	Kdm2b	Lman2	Atl2	Rims3	Glul
GGCAGUG	mmu-miR-34a-5p/mmu-miR-34b-5p/mmu-miR-34c-5p/mmu-miR-449a-5p/mmu-miR-449b/mmu-miR-449c-5p	0.891244	0.998959	1.40423	9	Fam76a	Cntnap2	Klhdc8a	Rims3	Sox12	Fam210b	Trp53inp2	Syt2	Tmem231
GGCUCAG	mmu-miR-24-3p/mmu-miR-5124b/mmu-miR-6361/mmu-miR-6369/mmu-miR-6410/mmu-miR-6413	0.494739	0.998959	0.969226	13	Grip1	Svip	Pkdcc	Cdh7	Insig1	Angel1	Rims3	Plk3	Neurod1	Slc25a44	B3galt5	Prkcb	Fam210b
GGCUCUG	mmu-miR-7239-3p/mmu-miR-760-3p	0.151045	0.998959	0.735246	14	Gcgr	Rnf115	Brap	Slc22a23	Kcnb1	D630039A03Rik	Hspa12a	Dnmt3b	Adora1	B3galt5	Lrfn4	Cntnap2	Rab3d	Syt2
GGGCCCC	mmu-miR-296-5p	0.188867	0.998959	0.641752	6	Tmem135	Cplx3	Ffar1	Lypla2	Kctd15	Sox12
GGGUCUU	mmu-miR-193a-5p	0.828749	0.998959	1.58214	2	Prkcb	Kctd15
GGUAGAC	mmu-miR-1193-5p/mmu-miR-379-5p	0.576916	0.998959	0.962628	2	Socs2	Kcnb1
GGUUUAC	mmu-miR-299a-5p	0.767591	0.998959	1.33434	3	Slc2a2	Brap	Bhlhe41
GUAAACA	mmu-miR-30a-5p/mmu-miR-30b-5p/mmu-miR-30c-5p/mmu-miR-30d-5p/mmu-miR-30e-5p/mmu-miR-384-5p	0.221717	0.998959	0.863505	30	Josd1	Adra2a	Camk2n1	Nudt5	Sox12	Ttc39a	Brap	Ube3c	6430571L13Rik	Atl2	Neurod1	Glp1r	Papola	Slc22a23	Siah2	Nkx2-2	Fam210b	Kcnj12	Vamp3	Pon2	Klf9	B3gat2	Ceacam1	Fam217b	Mcf2l	Car10	Frzb	Gatm	Galr1	Mfap5
GUAACAG	mmu-miR-194-5p	0.305217	0.998959	0.819663	10	Trp53inp2	Slc40a1	Bmp1	Kdm2b	Slc7a5	Tmed9	Prss53	Socs2	Cerk	Eif4e3
GUAGUGU	mmu-miR-142a-3p.1	0.849959	0.998959	1.48683	4	Vamp3	Ppp1r37	Trp53inp2	Josd1
GUAUUAC	mmu-miR-496a-3p.2	0.738203	0.998959	1.2708	3	Phf21b	Tox3	Cntnap2
GUCAACA	mmu-miR-505-3p.1	0.956733	0.998959	2.42087	2	Rnf115	Syt2
GUCACUC	mmu-miR-668-3p	0.620642	0.998959	1.06111	3	Tmem231	Tox3	Cnot4
GUCUGCC	mmu-miR-346-5p	0.699168	0.998959	1.19455	3	6430571L13Rik	Trp53inp2	Dcaf12l1
GUCUUGC	mmu-miR-431-5p	0.0317152	0.998959	0.430255	7	Egfr	Gadd45g	Josd1	Gcgr	Tmem231	Ttc39a	Slc25a44
GUGACAG	mmu-miR-542-3p	0.583265	0.998959	1.02617	6	Galnt14	Nudt5	Sec61a1	R3hdm2	Bhlhe41	Cux2
GUGACUG	mmu-miR-134-5p	0.917868	0.998959	2.03963	2	Rnpepl1	Camk2n1
GUGCAAA	mmu-miR-19a-3p/mmu-miR-19b-3p	0.925914	0.998959	1.36992	15	Neurod1	Impdh1	Wdr45b	Npepl1	Jph3	Prrt3	Mbd2	Vamp3	Pon2	Nmt2	R3hdm2	Adipor1	Sox12	Fras1	Slc22a23
GUGGGGA	mmu-miR-491-5p/mmu-miR-7003-5p	0.581883	0.998959	1.01505	4	Lman2	Josd1	Vipas39	Syt2
UAAGACG	mmu-miR-208a-3p/mmu-miR-208b-3p	0.475126	0.998959	0.88638	4	Bhlhe41	Phf21b	Tbc1d22b	Eif4e3
UAAGACU	mmu-miR-499-5p	0.0335692	0.998959	0.549619	12	Bhlhe41	Phf21b	Tbc1d22b	Eif4e3	Cntnap2	Jph3	Tram1	Slc22a23	Fam217b	Tox3	Tmed9	Comt
UAAGGCA	mmu-miR-124-3p.2/mmu-miR-5624-3p/mmu-miR-6540-5p	0.942277	0.998959	1.3939	16	Pard3	Gga2	Vamp3	Fut10	Kcng3	Ggt7	Trabd	Kcnj12	Neurod1	Elovl2	Ppp1r3d	Slc40a1	Rnf128	Dcaf12l1	Sox12	Rnpepl1
UAAUACA	mmu-miR-374c-5p	0.992173	0.998959	2.08592	7	Paxip1	Elovl2	Trp53inp2	Camk2n1	Pax6	Atl2	Pard3
UAAUGCU	mmu-miR-155-5p	0.578503	0.998959	1.02458	8	Papola	Pcsk9	6430571L13Rik	Phf21b	Grip1	Nudt5	Ttc28	Mlycd
UACAGUA	mmu-miR-101a-3p.2/mmu-miR-101b-3p.1/mmu-miR-101b-3p.2	0.859381	0.998959	1.2717	14	Mbd2	Socs2	Tspan5	Cxxc4	Neurod1	Klf9	Galnt18	Camk2n1	R3hdm2	Phactr3	Trp53inp2	Ina	Tox3	Hcn4
UACAGUU	mmu-miR-582-5p	0.69142	0.998959	1.12275	10	Grip1	Galnt18	Camk2n1	Kcng3	Kcnb1	Mbd2	Insm1	R3hdm2	Gm4791	Cxxc4
UAGACUG	mmu-miR-151-3p	0.67496	0.998959	1.15325	2	Slc2a2	Kdm2b
UAGAGGA	mmu-miR-877-5p	0.739465	0.998959	1.30574	2	Vwa5b1	Mpp3
UAGUGUU	mmu-miR-142a-3p.2	0.815103	0.998959	1.28906	8	Vamp3	Nudt5	Trp53inp2	Wdr45b	Kdelr1	Elovl2	4833439L19Rik	Klf9
UAUAAAG	mmu-miR-340-5p	0.838664	0.998959	1.20281	20	Rars2	Gga2	Fras1	Prkar2b	Coq10a	Galnt18	Pcsk9	Kcng3	Slc35d3	Kcnb1	Insm1	Mpp3	Foxo6	Kdelr1	Kctd15	Bhlhe41	Cntnap2	Svil	Desi1	Lrrc10b
UAUAAUA	mmu-miR-374b-5p	0.994581	0.998959	2.28108	6	Paxip1	Cda	Neurod1	Cerk	Nkx2-2	Desi1
UAUUGCU	mmu-miR-137-3p	0.334826	0.998959	0.905442	24	Kcnb1	Lrrc10b	Pard3	Ttc28	Prkar2b	Desi1	Cxxc4	Neurod1	Grip1	Tox3	Kcnab3	Ube3c	Diras2	Fam210b	Elovl2	Slc22a23	Mbd2	Ogdhl	Ppp1r37	Rims3	Papss2	Insig1	B3galt5	Efcab1
UCAACAC	mmu-miR-505-3p.2	0.780677	0.998959	1.29621	5	Cited2	Trp53inp2	Sirpa	Glp1r	Gm4791
UCAACAG	mmu-miR-421-3p	0.774921	0.998959	1.26444	6	Egfr	Elovl2	Rnf182	Vipas39	Sirpa	Cnot4
UCAAGUA	mmu-miR-26a-5p/mmu-miR-26b-5p	0.967169	0.998959	1.58907	11	Slc22a23	Ttc28	Bhlhe41	Brap	Mnx1	Trp53inp2	Tram1	Kcng3	Syt2	Dnmt3b	Tspan5
UCACACA	mmu-miR-377-3p	0.92328	0.998959	1.55491	7	Rnf115	Nkx2-2	Kcnj12	Harbi1	Ubxn10	Kctd15	Atl2
UCACAGU	mmu-miR-27a-3p/mmu-miR-27b-3p	0.949815	0.998959	1.41416	16	Hcn4	Ttc39a	Syt2	Slc22a23	Gns	Adora2b	Car10	Cntnap2	Asic1	Prkcb	Slc25a44	Ldlr	Josd1	Rtkn2	Rims3	Egfr
UCACAUU	mmu-miR-23a-3p/mmu-miR-23b-3p	0.973768	0.998959	1.56894	13	Tox3	Lman2	B3gat2	Sirpa	Adra2a	Kcnb1	Hspa12a	Phf21b	Insm1	Diras2	Mcfd2	Pkdcc	Pigo
UCAUGAU	mmu-miR-433-3p	0.0932094	0.998959	0.619513	10	Elovl2	Wdr45b	Ggt7	Fam76a	Grip1	Kcng3	Prkcb	Nmt2	Foxo6	Slc25a44
UCCAGUU	mmu-miR-145a-5p/mmu-miR-145b	0.173345	0.998959	0.778175	17	Coro2b	Nudt5	Cited2	Tmem167	Ggt7	Kdm2b	Mbd2	Neurod1	Tmem135	Brap	Kcnj12	Eif4e3	Insig1	Abracl	Galnt14	B3gat2	Ddc
UCCCUUU	mmu-miR-204-5p/mmu-miR-211-5p/mmu-miR-7670-3p	0.812956	0.998959	1.25618	10	Fras1	Abcb10	Rtkn2	Tox3	Gga2	Slc18a1	Hspa12a	Cntnap2	Flad1	Fancf
UCCUAUG	mmu-miR-202-5p	0.943032	0.998959	2.25884	2	Pcsk9	Fut10
UGAAACA	mmu-miR-653-5p	0.674991	0.998959	1.11195	9	Lman2	4833439L19Rik	Klf9	Cplx3	Klhdc8a	Dnmt3b	Insm1	Sytl4	Cxxc4
UGAAAGG	mmu-miR-488-3p	0.538614	0.998959	0.985774	7	Nudt5	Slc40a1	Eif4e3	Coq10a	Trp53inp2	Pyroxd2	Pdx1
UGAAAUG	mmu-miR-203-3p.2	0.563124	0.998959	1.0124	9	Josd1	Kcnb1	Dnmt3b	Insig1	Ina	Slc22a23	Tshz1	Elovl2	Syt2
UGACCUA	mmu-miR-192-5p/mmu-miR-215-5p	0.841031	0.998959	1.6298	2	Tmem167	Ppp1r3d
UGCAUAG	mmu-miR-153-3p	0.489793	0.998959	0.968074	14	Ttc28	Trp53inp2	Neurod1	Cux2	Grip1	B3gat2	Prkar2b	Kcnb1	Socs2	Tshz1	Cited2	Nmt2	Fam210b	Gatm
UGCAUAU	mmu-miR-448-3p	0.379988	0.998959	0.894444	13	Socs2	Jph3	Tram1	Fam210b	Prkar2b	Trp53inp2	Kcnb1	B3gat2	Prkcb	Hspa12a	Nmt2	Kctd15	Ttc28
UGCAUUG	mmu-miR-33-5p	0.951664	0.998959	1.92049	4	Ttc28	Desi1	Rnf115	Adra2a
UGCCCUG	mmu-miR-874-3p	0.393196	0.998959	0.841902	6	Bmp1	Grip1	Trp53inp2	Cplx3	Cntnap2	Sox12
UGGCACU	mmu-miR-183-5p.2	0.379198	0.998959	0.898634	14	Slc22a23	Camk2n1	Prrt3	Ggt7	Gga2	Vamp3	Gjd2	Ina	Cplx3	Cdh7	Tbc1d22b	Coro2b	Dusp18	G6pc2
UGGCCCU	mmu-miR-328-3p/mmu-miR-6395	0.911164	0.998959	1.99197	2	Gga2	Kctd15
UGGUCCC	mmu-miR-133a-3p.1	0.723951	0.998959	1.16993	8	Tmem167	Tram1	Gch1	Plk3	Adora1	Nkx2-2	Phf21b	Otub2
UGUACAU	mmu-miR-493-5p	0.468427	0.998959	0.956909	15	Egfr	Kdm2b	Cited2	Slc22a23	Nkx6-1	Tbc1d22b	Camk2n1	B3gat2	Hspa12a	Rims3	Mbd2	Kctd15	Tox3	Bhlhe41	Cxxc4
UGUGCUU	mmu-miR-218-5p/mmu-miR-7002-3p	0.21633	0.998959	0.834393	22	Kcnb1	Nmt2	Rims3	Asic1	Sec61a1	Tspan5	B3gat2	Cntnap2	Klhdc8a	Slc22a23	Papola	Tox3	Siah2	Diras2	Grip1	Klf9	Phf21b	Prkar2b	Trp53inp2	Dnmt3b	Kcng3	Hcn4
UUAUUGA	mmu-miR-325-3p	0.886166	0.998959	1.18745	34	Th	Mlxipl	Gng4	Bmp1	Galnt14	F2	Fam210b	Hcn4	Prkar2b	Cited2	Coq10a	Galnt18	Pcsk9	Camk2n1	Kcng3	Sstr3	Mbd2	Msln	Pyroxd2	Adora1	Efcab1	Flcn	Ubxn10	Car10	Tmed9	Cutc	G6pc2	Cdh7	Sytl4	Lnx1	Glp1r	Cntnap2	Desi1	Pard3
UUCCUAG	mmu-miR-384-3p	0.811657	0.998959	1.39152	4	Cpm	Pcsk9	Fancf	Otub2
UUCCUCA	mmu-miR-670-3p	0.625001	0.998959	1.06747	8	Frzb	Hcn4	Klf9	Camk2n1	Kcng3	B3gat2	Rims3	Cntnap2
UUGGCAA	mmu-miR-182-5p	0.402316	0.998959	0.936521	23	Vamp3	Rims3	Tox3	Kdm2b	Pyroxd2	Trp53inp2	Phf21b	Camk2n1	Slc22a23	Prrt3	Esyt1	Pax6	Ubxn10	Kdelr1	Nkx2-2	Bhlhe41	Cited2	Hadh	Insig1	Grip1	Ube3c	Creb3l1	Ldlr
UUGGCAC	mmu-miR-96-5p	0.461822	0.998959	0.963081	21	Vamp3	Camk2n1	Slc22a23	Prrt3	Gga2	Esyt1	Phf21b	Rims3	Cdh7	Tox3	Pax6	Coro2b	Pyroxd2	Tbc1d22b	Kdelr1	Trp53inp2	Ubxn10	Hcn4	Cpm	Galr1	G6pc2
UUGGUCC	mmu-miR-133a-3p.2/mmu-miR-133b-3p/mmu-miR-133c	0.293007	0.998959	0.84281	14	Syt2	Tmem167	Kcnj12	Vamp3	Esyt1	Gch1	Bhlhe41	Egfr	Ftl1	Sec61a1	Cxxc4	Sephs2	Nkx2-2	Prkcb
UUGUGAC	mmu-miR-153-5p/mmu-miR-758-3p	0.728801	0.998959	1.22949	4	Josd1	Prkar2b	Hepacam2	Camk2n1
UUGUUCG	mmu-miR-375-3p	0.668753	0.998959	1.13418	4	Pax6	Sox12	Ggt7	Insm1
UUUUUGC	mmu-miR-129-5p	0.683246	0.998959	1.11512	10	Socs2	Tram1	Kdm2b	Sec61a1	Lss	Camk2n1	Tshz1	Rims3	Glul	Pax6
