# Supplementary material for: Glucose-dependent miR-125b is a negative regulator of β-cell function
Source: bioRxiv preprint, doi:10.1101/2021.05.17.444559, version 3 (2022-03-09)
Supplement: Sup_Table7 [file 444559_file09.xlsx]

## Sheet: UpReg<0.05 
Supplemental Table 7. Genes up-regulated (p-value <0.05, baseMean >10 RPKM) in human islets infected with pAd-MIR125B versus control
Gene.stable.ID.version	baseMean	log2FoldChange	lfcSE	stat	pvalue	padj	Gene.stable.ID	Gene.name
ENSG00000202198.1	196.839	8.91222	3.19322	2.79098	0.00525483	0.999937	ENSG00000202198	AL162581.1
ENSG00000207971.1	159.705	8.66589	3.86743	2.24073	0.0250433	0.999937	ENSG00000207971	MIR125B1
ENSG00000268173.3	17.6756	8.02505	3.84793	2.08555	0.0370194	0.999937	ENSG00000268173	AC007192.1
ENSG00000286169.2	74.0018	6.92968	2.73533	2.5334	0.0112962	0.999937	ENSG00000286169	PDCD6-AHRR
ENSG00000269242.1	39.983	6.37926	2.64077	2.41568	0.0157059	0.999937	ENSG00000269242	AC010422.3
ENSG00000256463.8	10.129	6.31108	1.76664	3.57237	0.000353769	0.675035	ENSG00000256463	SALL3
ENSG00000256349.1	24.7301	5.59499	2.63438	2.12384	0.0336838	0.999937	ENSG00000256349	AP002748.5
ENSG00000260596.5	46.0302	5.57289	1.05055	5.30473	1.13e-07	0.00172254	ENSG00000260596	DUX4
ENSG00000225173.1	139.697	5.47808	0.893939	6.12803	8.9e-10	4.07e-05	ENSG00000225173	AL662890.1
ENSG00000178722.13	15.0842	5.28823	1.50784	3.50715	0.000452929	0.702031	ENSG00000178722	C5orf64
ENSG00000082293.13	15.5261	5.18021	1.32163	3.91955	8.87e-05	0.338556	ENSG00000082293	COL19A1
ENSG00000280356.1	10.6813	4.8935	1.66875	2.93244	0.00336315	0.999937	ENSG00000280356	AL021877.2
ENSG00000222036.8	11.182	4.87499	1.66978	2.91953	0.00350554	0.999937	ENSG00000222036	POTEM
ENSG00000270316.1	23.1441	4.75414	1.32834	3.57899	0.000344921	0.675035	ENSG00000270316	BORCS7-ASMT
ENSG00000261116.1	11.1273	4.74959	1.57129	3.02274	0.00250494	0.999937	ENSG00000261116	AL049555.1
ENSG00000232827.3	10.0442	4.57314	1.59586	2.86563	0.00416183	0.999937	ENSG00000232827	LINC01189
ENSG00000159307.19	18.9036	4.4293	1.29062	3.43192	0.00059933	0.831707	ENSG00000159307	SCUBE1
ENSG00000105492.16	15.9041	4.39409	1.52329	2.8846	0.00391916	0.999937	ENSG00000105492	SIGLEC6
ENSG00000215182.8	11.1402	4.39245	1.66914	2.63157	0.00849917	0.999937	ENSG00000215182	MUC5AC
ENSG00000236333.4	12.3977	4.1961	1.50232	2.79308	0.00522093	0.999937	ENSG00000236333	TRHDE-AS1
ENSG00000248473.2	24.8487	4.14927	1.31941	3.1448	0.00166201	0.999937	ENSG00000248473	LINC01962
ENSG00000228876.4	10.2402	4.10886	1.55261	2.64642	0.00813486	0.999937	ENSG00000228876	AC010745.2
ENSG00000234663.7	28.663	4.1037	1.12638	3.64326	0.000269203	0.632672	ENSG00000234663	LINC01934
ENSG00000186960.12	14.2189	4.09387	1.6861	2.428	0.0151822	0.999937	ENSG00000186960	LINC01551
ENSG00000286032.1	13.2984	4.08296	1.49836	2.72496	0.006431	0.999937	ENSG00000286032	FP236383.6
ENSG00000169876.14	14.4618	4.07849	1.22734	3.32303	0.000890456	0.948335	ENSG00000169876	MUC17
ENSG00000154451.14	15.8967	4.05102	1.40676	2.87969	0.00398065	0.999937	ENSG00000154451	GBP5
ENSG00000205746.9	19.5102	4.03743	1.29619	3.11485	0.00184037	0.999937	ENSG00000205746	AC126755.1
ENSG00000205056.8	10.5034	3.99821	1.61937	2.46899	0.0135496	0.999937	ENSG00000205056	LINC02397
ENSG00000176798.2	10.491	3.98094	1.72812	2.30363	0.0212435	0.999937	ENSG00000176798	OR51L1
ENSG00000186652.10	12.1648	3.94783	1.46294	2.69856	0.00696409	0.999937	ENSG00000186652	PRG2
ENSG00000165309.14	11.0271	3.94156	1.35591	2.90695	0.00364972	0.999937	ENSG00000165309	ARMC3
ENSG00000134539.17	24.5107	3.93572	1.20441	3.26777	0.001084	0.999937	ENSG00000134539	KLRD1
ENSG00000286105.1	16.183	3.9183	1.35787	2.88563	0.00390629	0.999937	ENSG00000286105	AL353579.1
ENSG00000278000.1	10.7654	3.90806	1.51842	2.57377	0.0100598	0.999937	ENSG00000278000	AC139100.2
ENSG00000261889.1	47.2405	3.86878	1.02832	3.76223	0.000168404	0.482004	ENSG00000261889	AC108134.2
ENSG00000173262.11	10.266	3.86486	1.81287	2.1319	0.0330149	0.999937	ENSG00000173262	SLC2A14
ENSG00000161405.17	17.9169	3.80382	1.41543	2.68739	0.00720126	0.999937	ENSG00000161405	IKZF3
ENSG00000236824.2	330.543	3.75872	0.637757	5.89366	3.78e-09	8.65e-05	ENSG00000236824	BCYRN1
ENSG00000176884.16	13.4319	3.75551	1.4122	2.65934	0.00782931	0.999937	ENSG00000176884	GRIN1
ENSG00000186417.14	16.3357	3.73445	1.27297	2.93365	0.00334999	0.999937	ENSG00000186417	GLDN
ENSG00000230453.9	10.3487	3.72777	1.54855	2.40726	0.0160727	0.999937	ENSG00000230453	ANKRD18B
ENSG00000145794.17	18.4972	3.6661	1.20956	3.03093	0.00243798	0.999937	ENSG00000145794	MEGF10
ENSG00000236444.5	19.9176	3.6572	1.24548	2.93638	0.00332072	0.999937	ENSG00000236444	UBE2L5
ENSG00000227827.3	12.9483	3.65187	1.53623	2.37715	0.0174468	0.999937	ENSG00000227827	AC138969.2
ENSG00000140795.13	13.5053	3.63182	1.25598	2.89161	0.00383269	0.999937	ENSG00000140795	MYLK3
ENSG00000133863.9	11.2642	3.63124	1.39612	2.60094	0.00929679	0.999937	ENSG00000133863	TEX15
ENSG00000211891.6	17.8374	3.58469	1.36913	2.61822	0.00883906	0.999937	ENSG00000211891	IGHE
ENSG00000278920.1	69.7765	3.57208	0.828568	4.31114	1.62e-05	0.123961	ENSG00000278920	AC005005.4
ENSG00000285565.1	20.8346	3.55228	1.32505	2.68088	0.00734297	0.999937	ENSG00000285565	AL671762.1
ENSG00000251493.5	13.2889	3.51439	1.33169	2.63905	0.0083138	0.999937	ENSG00000251493	FOXD1
ENSG00000141338.14	12.4681	3.51423	1.32497	2.65231	0.00799431	0.999937	ENSG00000141338	ABCA8
ENSG00000140538.16	27.9583	3.49452	1.11265	3.14072	0.00168531	0.999937	ENSG00000140538	NTRK3
ENSG00000180385.8	41.7434	3.46706	0.780795	4.44042	8.98e-06	0.0822313	ENSG00000180385	EMC3-AS1
ENSG00000198156.10	11.2265	3.46393	1.49714	2.3137	0.0206843	0.999937	ENSG00000198156	NPIPB6
ENSG00000254859.1	11.3373	3.45598	1.39387	2.47942	0.0131595	0.999937	ENSG00000254859	AC067930.3
ENSG00000279442.1	17.1104	3.44862	1.29185	2.66951	0.00759615	0.999937	ENSG00000279442	AP000542.2
ENSG00000134207.17	13.4005	3.44006	1.19118	2.88794	0.00387775	0.999937	ENSG00000134207	SYT6
ENSG00000154162.15	17.7658	3.42069	1.24136	2.75559	0.00585872	0.999937	ENSG00000154162	CDH12
ENSG00000087237.12	11.3799	3.37551	1.4995	2.25109	0.0243797	0.999937	ENSG00000087237	CETP
ENSG00000183117.19	15.7741	3.37419	1.3136	2.56866	0.0102094	0.999937	ENSG00000183117	CSMD1
ENSG00000196218.13	26.0443	3.37093	1.37259	2.4559	0.0140533	0.999937	ENSG00000196218	RYR1
ENSG00000171502.15	13.2647	3.35181	1.38363	2.42248	0.015415	0.999937	ENSG00000171502	COL24A1
ENSG00000279217.1	23.085	3.34985	1.0819	3.09627	0.00195971	0.999937	ENSG00000279217	Z95114.1
ENSG00000214562.14	18.7271	3.32685	1.22655	2.71237	0.00668043	0.999937	ENSG00000214562	NUTM2D
ENSG00000232855.7	13.8303	3.29813	1.29138	2.55396	0.0106506	0.999937	ENSG00000232855	AF165147.1
ENSG00000237949.2	10.4556	3.27124	1.45818	2.24338	0.0248725	0.999937	ENSG00000237949	LINC00844
ENSG00000226476.6	10.9162	3.26715	1.42153	2.29833	0.021543	0.999937	ENSG00000226476	LINC01748
ENSG00000172000.7	14.0394	3.24986	1.21311	2.67895	0.00738545	0.999937	ENSG00000172000	ZNF556
ENSG00000240405.7	10.6977	3.23994	1.4662	2.20976	0.027122	0.999937	ENSG00000240405	SAMMSON
ENSG00000177238.14	10.9798	3.2291	1.4603	2.21126	0.027018	0.999937	ENSG00000177238	TRIM72
ENSG00000101203.16	13.6798	3.22242	1.55271	2.07536	0.0379533	0.999937	ENSG00000101203	COL20A1
ENSG00000122012.14	13.9584	3.21451	1.31759	2.43968	0.0147002	0.999937	ENSG00000122012	SV2C
ENSG00000257524.6	17.3008	3.20587	1.17659	2.7247	0.00643592	0.999937	ENSG00000257524	AL157935.2
ENSG00000287001.1	520.845	3.18465	1.30687	2.43686	0.0148156	0.999937	ENSG00000287001	AC010624.5
ENSG00000079841.18	13.2281	3.17443	1.32866	2.3892	0.0168852	0.999937	ENSG00000079841	RIMS1
ENSG00000251372.6	23.1608	3.13963	1.26657	2.47885	0.0131807	0.999937	ENSG00000251372	LINC00499
ENSG00000279337.1	16.4717	3.13956	1.12871	2.78155	0.00541003	0.999937	ENSG00000279337	AC127024.7
ENSG00000182575.8	15.5922	3.11879	1.20707	2.58376	0.00977287	0.999937	ENSG00000182575	NXPH3
ENSG00000224924.7	15.9647	3.11376	1.21895	2.55446	0.0106354	0.999937	ENSG00000224924	LINC00320
ENSG00000108231.14	10.1221	3.08461	1.45535	2.1195	0.0340486	0.999937	ENSG00000108231	LGI1
ENSG00000236334.2	10.172	3.08021	1.42202	2.16608	0.0303047	0.999937	ENSG00000236334	PPIAL4G
ENSG00000225783.8	20.3671	3.07094	1.00751	3.04804	0.0023034	0.999937	ENSG00000225783	MIAT
ENSG00000184956.16	11.8775	3.07002	1.18829	2.58355	0.00977899	0.999937	ENSG00000184956	MUC6
ENSG00000087128.10	11.9375	3.06641	1.54625	1.98313	0.0473529	0.999937	ENSG00000087128	TMPRSS11E
ENSG00000162367.11	11.0864	3.06168	1.31863	2.32186	0.0202404	0.999937	ENSG00000162367	TAL1
ENSG00000273540.4	11.523	3.04346	1.53636	1.98095	0.0475968	0.999937	ENSG00000273540	AGBL1
ENSG00000225684.4	21.9318	3.00683	1.12856	2.6643	0.00771485	0.999937	ENSG00000225684	FAM225B
ENSG00000279091.1	11.7952	2.98907	1.33877	2.23269	0.0255693	0.999937	ENSG00000279091	AC026523.2
ENSG00000004777.18	19.4497	2.98492	1.0735	2.78054	0.00542682	0.999937	ENSG00000004777	ARHGAP33
ENSG00000261519.3	11.0065	2.98444	1.39253	2.14318	0.0320987	0.999937	ENSG00000261519	AC010542.4
ENSG00000066294.15	14.714	2.97639	1.22601	2.4277	0.015195	0.999937	ENSG00000066294	CD84
ENSG00000236138.4	31.9727	2.97612	1.05379	2.82422	0.00473965	0.999937	ENSG00000236138	DUX4L26
ENSG00000168453.15	12.4258	2.9526	1.4192	2.08047	0.0374827	0.999937	ENSG00000168453	HR
ENSG00000277128.2	11.6652	2.94973	1.42241	2.07376	0.0381018	0.999937	ENSG00000277128	AL589743.4
ENSG00000196361.10	10.2518	2.94529	1.44539	2.0377	0.0415795	0.999937	ENSG00000196361	ELAVL3
ENSG00000237505.8	15.3367	2.94064	1.15035	2.5563	0.0105793	0.999937	ENSG00000237505	PKN2-AS1
ENSG00000150637.9	14.8554	2.89705	1.21055	2.39317	0.0167035	0.999937	ENSG00000150637	CD226
ENSG00000259834.1	17.6108	2.88479	1.12665	2.56051	0.0104519	0.999937	ENSG00000259834	AL365361.1
ENSG00000257335.8	17.1501	2.86695	1.11797	2.56443	0.0103345	0.999937	ENSG00000257335	MGAM
ENSG00000283384.1	14.7896	2.85431	1.05792	2.69803	0.00697503	0.999937	ENSG00000283384	AL138694.1
ENSG00000279742.1	12.4318	2.83863	1.34366	2.11261	0.0346341	0.999937	ENSG00000279742	AP000974.1
ENSG00000280011.1	16.2474	2.81873	1.22721	2.29687	0.0216261	0.999937	ENSG00000280011	AL031595.2
ENSG00000065618.21	17.3834	2.81165	1.13235	2.48301	0.0130276	0.999937	ENSG00000065618	COL17A1
ENSG00000285108.1	10.7621	2.8039	1.34164	2.0899	0.0366268	0.999937	ENSG00000285108	AC103718.1
ENSG00000182272.12	15.6357	2.80189	1.1378	2.46255	0.0137951	0.999937	ENSG00000182272	B4GALNT4
ENSG00000259345.7	10.1866	2.79264	1.38894	2.01062	0.0443654	0.999937	ENSG00000259345	AC013652.1
ENSG00000204072.3	38.5982	2.76514	0.904344	3.05762	0.002231	0.999937	ENSG00000204072	ARMCX7P
ENSG00000281591.1	31.6991	2.76242	1.0073	2.7424	0.00609926	0.999937	ENSG00000281591	DBET
ENSG00000251131.2	14.8515	2.74936	1.28079	2.14661	0.0318242	0.999937	ENSG00000251131	AC025171.3
ENSG00000235033.7	13.7901	2.74251	1.18053	2.32312	0.0201726	0.999937	ENSG00000235033	DAAM2-AS1
ENSG00000258130.8	11.0821	2.7368	1.2553	2.1802	0.0292425	0.999937	ENSG00000258130	AC106782.1
ENSG00000203620.2	17.863	2.71568	0.993505	2.73343	0.00626783	0.999937	ENSG00000203620	AL354919.1
ENSG00000253452.6	14.8983	2.70349	1.32623	2.03848	0.0415017	0.999937	ENSG00000253452	AC124290.1
ENSG00000090971.5	23.5042	2.68225	0.950889	2.82079	0.00479059	0.999937	ENSG00000090971	NAT14
ENSG00000245526.11	12.0099	2.67968	1.23306	2.1732	0.0297655	0.999937	ENSG00000245526	LINC00461
ENSG00000253552.8	12.1359	2.67649	1.33761	2.00096	0.0453972	0.999937	ENSG00000253552	HOXA-AS2
ENSG00000149527.18	15.6291	2.66829	1.10905	2.40593	0.0161316	0.999937	ENSG00000149527	PLCH2
ENSG00000140807.7	35.4052	2.65385	0.88034	3.01457	0.00257346	0.999937	ENSG00000140807	NKD1
ENSG00000242512.9	20.8502	2.64719	0.971204	2.72568	0.0064169	0.999937	ENSG00000242512	LINC01206
ENSG00000210107.1	46.2961	2.6428	1.04406	2.53128	0.0113648	0.999937	ENSG00000210107	MT-TQ
ENSG00000144285.22	19.5891	2.62877	1.26141	2.084	0.0371606	0.999937	ENSG00000144285	SCN1A
ENSG00000279573.1	46.6045	2.62599	0.824523	3.18486	0.00144823	0.999937	ENSG00000279573	AC134407.2
ENSG00000181652.19	15.4563	2.62234	1.16766	2.24581	0.0247159	0.999937	ENSG00000181652	ATG9B
ENSG00000241163.8	34.8003	2.61888	0.914815	2.86275	0.00419986	0.999937	ENSG00000241163	LINC00877
ENSG00000286042.1	24.344	2.61565	1.08792	2.40428	0.0162045	0.999937	ENSG00000286042	LCAL1
ENSG00000175643.10	16.4969	2.6085	1.14345	2.28125	0.0225335	0.999937	ENSG00000175643	RMI2
ENSG00000266074.9	42.3862	2.60602	0.764109	3.41053	0.000648359	0.848332	ENSG00000266074	BAHCC1
ENSG00000152954.12	10.4137	2.59689	1.23213	2.10765	0.0350616	0.999937	ENSG00000152954	NRSN1
ENSG00000253877.6	23.6257	2.5861	0.936124	2.76257	0.00573491	0.999937	ENSG00000253877	LINC01608
ENSG00000103449.12	58.5362	2.58194	0.697407	3.7022	0.000213739	0.575775	ENSG00000103449	SALL1
ENSG00000172482.5	14.825	2.57873	1.13387	2.27427	0.0229499	0.999937	ENSG00000172482	AGXT
ENSG00000215196.5	15.4138	2.56763	1.17595	2.18345	0.0290023	0.999937	ENSG00000215196	BASP1-AS1
ENSG00000169668.11	12.5249	2.55489	1.23987	2.06061	0.0393401	0.999937	ENSG00000169668	BCRP2
ENSG00000224271.7	16.2814	2.55103	1.16461	2.19045	0.0284914	0.999937	ENSG00000224271	AL117329.1
ENSG00000206337.12	94.7143	2.55095	0.640456	3.98303	6.8e-05	0.338556	ENSG00000206337	HCP5
ENSG00000266340.1	40.4762	2.51833	0.795594	3.16535	0.00154895	0.999937	ENSG00000266340	AC138207.7
ENSG00000181143.15	31.9549	2.49906	1.10441	2.2628	0.0236479	0.999937	ENSG00000181143	MUC16
ENSG00000081189.16	48.468	2.49639	0.626664	3.98362	6.79e-05	0.338556	ENSG00000081189	MEF2C
ENSG00000169896.18	12.7571	2.4963	1.23182	2.02652	0.0427117	0.999937	ENSG00000169896	ITGAM
ENSG00000286891.1	17.1584	2.48425	1.1467	2.16643	0.0302782	0.999937	ENSG00000286891	AC080132.1
ENSG00000196620.10	12.8111	2.47147	1.24136	1.99094	0.0464874	0.999937	ENSG00000196620	UGT2B15
ENSG00000132749.11	23.3402	2.43963	1.07213	2.27551	0.0228753	0.999937	ENSG00000132749	TESMIN
ENSG00000254681.6	32.2917	2.42323	1.10562	2.19175	0.0283978	0.999937	ENSG00000254681	PKD1P5
ENSG00000237596.7	14.2893	2.41588	1.10476	2.1868	0.0287575	0.999937	ENSG00000237596	AL138828.1
ENSG00000121743.4	21.4269	2.41104	1.01459	2.37637	0.0174838	0.999937	ENSG00000121743	GJA3
ENSG00000255794.9	14.5077	2.40264	1.06931	2.2469	0.0246462	0.999937	ENSG00000255794	RMST
ENSG00000185942.12	24.585	2.38868	0.961905	2.48328	0.0130177	0.999937	ENSG00000185942	NKAIN3
ENSG00000170074.19	14.1007	2.36692	1.15891	2.04237	0.0411153	0.999937	ENSG00000170074	FAM153A
ENSG00000260886.2	54.6929	2.35971	0.776816	3.03767	0.00238417	0.999937	ENSG00000260886	TAT-AS1
ENSG00000242590.1	32.0263	2.34102	0.988018	2.36941	0.0178165	0.999937	ENSG00000242590	AL645608.5
ENSG00000273802.2	18.4395	2.33026	0.948597	2.45653	0.0140285	0.999937	ENSG00000273802	H2BC8
ENSG00000274979.1	22.9441	2.32924	1.09234	2.13234	0.0329791	0.999937	ENSG00000274979	AC020656.2
ENSG00000103522.16	25.2269	2.30074	1.0146	2.26762	0.0233523	0.999937	ENSG00000103522	IL21R
ENSG00000187627.16	43.358	2.28011	0.881943	2.58533	0.00972868	0.999937	ENSG00000187627	RGPD1
ENSG00000122966.16	39.4702	2.27296	0.879619	2.58403	0.00976534	0.999937	ENSG00000122966	CIT
ENSG00000259417.3	32.7919	2.26652	0.935872	2.42182	0.0154429	0.999937	ENSG00000259417	CTXND1
ENSG00000187323.12	17.4992	2.25807	1.02614	2.20054	0.0277685	0.999937	ENSG00000187323	DCC
ENSG00000272078.1	25.1297	2.25237	0.885216	2.54443	0.0109456	0.999937	ENSG00000272078	AL139423.1
ENSG00000130487.9	26.4112	2.23284	0.925968	2.41136	0.015893	0.999937	ENSG00000130487	KLHDC7B
ENSG00000272455.1	22.4092	2.23161	0.96917	2.30259	0.0213016	0.999937	ENSG00000272455	MRPL20-DT
ENSG00000165730.16	12.494	2.21947	1.13025	1.9637	0.0495652	0.999937	ENSG00000165730	STOX1
ENSG00000210194.1	17.6294	2.2104	1.11214	1.98752	0.0468648	0.999937	ENSG00000210194	MT-TE
ENSG00000183935.5	15.2863	2.21017	1.07877	2.0488	0.0404821	0.999937	ENSG00000183935	HTR7P1
ENSG00000270885.2	27.9416	2.20309	0.926395	2.37814	0.0174004	0.999937	ENSG00000270885	RASL10B
ENSG00000166450.13	29.3186	2.16083	0.987495	2.18819	0.0286558	0.999937	ENSG00000166450	PRTG
ENSG00000175262.14	19.5275	2.15154	0.910803	2.36224	0.0181647	0.999937	ENSG00000175262	C1orf127
ENSG00000111052.7	24.7563	2.14711	0.876104	2.45075	0.0142559	0.999937	ENSG00000111052	LIN7A
ENSG00000164107.9	22.7137	2.11929	0.911407	2.32529	0.0200564	0.999937	ENSG00000164107	HAND2
ENSG00000082482.14	19.535	2.11805	0.966529	2.1914	0.028423	0.999937	ENSG00000082482	KCNK2
ENSG00000238098.9	18.4162	2.11257	0.975865	2.16482	0.0304017	0.999937	ENSG00000238098	ABCA17P
ENSG00000284540.1	29.5508	2.10369	0.928359	2.26603	0.0234493	0.999937	ENSG00000284540	AC066615.1
ENSG00000143226.15	34.5586	2.10214	0.92618	2.26969	0.0232264	0.999937	ENSG00000143226	FCGR2A
ENSG00000198108.4	22.0712	2.07947	0.9861	2.10879	0.034963	0.999937	ENSG00000198108	CHSY3
ENSG00000272636.4	24.1361	2.06939	0.959528	2.15667	0.0310313	0.999937	ENSG00000272636	DOC2B
ENSG00000278233.1	61.5015	2.05162	0.845253	2.42722	0.0152149	0.999937	ENSG00000278233	RNA5-8SN2
ENSG00000233750.3	38.867	2.04585	0.807457	2.53369	0.0112868	0.999937	ENSG00000233750	CICP27
ENSG00000249378.6	24.5805	2.03474	0.96148	2.11626	0.0343228	0.999937	ENSG00000249378	LINC01060
ENSG00000151322.19	19.4581	2.01831	0.926888	2.17752	0.0294421	0.999937	ENSG00000151322	NPAS3
ENSG00000257591.6	31.3033	2.01444	1.02555	1.96426	0.0495	0.999937	ENSG00000257591	ZNF625
ENSG00000186185.14	38.2482	2.01295	0.818044	2.46068	0.0138673	0.999937	ENSG00000186185	KIF18B
ENSG00000042781.14	22.209	1.99603	0.865617	2.3059	0.0211161	0.999937	ENSG00000042781	USH2A
ENSG00000127528.6	35.7251	1.97571	0.743626	2.65686	0.00788723	0.999937	ENSG00000127528	KLF2
ENSG00000184261.5	27.0877	1.94694	0.871161	2.23488	0.0254255	0.999937	ENSG00000184261	KCNK12
ENSG00000284820.1	48.3927	1.94677	0.738194	2.63721	0.00835909	0.999937	ENSG00000284820	AC068946.2
ENSG00000007174.18	25.9348	1.94516	0.849389	2.29006	0.0220176	0.999937	ENSG00000007174	DNAH9
ENSG00000180900.20	147.705	1.92811	0.482417	3.99676	6.42e-05	0.338556	ENSG00000180900	SCRIB
ENSG00000142694.6	41.8026	1.91893	0.724507	2.6486	0.00808263	0.999937	ENSG00000142694	EVA1B
ENSG00000274012.1	106.702	1.91677	0.77287	2.48007	0.0131355	0.999937	ENSG00000274012	RN7SL2
ENSG00000249992.2	123.82	1.91532	0.488262	3.92272	8.76e-05	0.338556	ENSG00000249992	TMEM158
ENSG00000105298.14	56.8929	1.91213	0.623369	3.06742	0.00215916	0.999937	ENSG00000105298	CACTIN
ENSG00000281344.1	238.65	1.89541	0.606216	3.12663	0.00176824	0.999937	ENSG00000281344	HELLPAR
ENSG00000130758.8	27.7918	1.89482	0.859254	2.20519	0.0274411	0.999937	ENSG00000130758	MAP3K10
ENSG00000091262.15	21.1562	1.89252	0.927501	2.04045	0.0413055	0.999937	ENSG00000091262	ABCC6
ENSG00000152463.15	46.364	1.89211	0.71952	2.62968	0.00854644	0.999937	ENSG00000152463	OLAH
ENSG00000253123.4	44.2049	1.88366	0.744721	2.52936	0.0114272	0.999937	ENSG00000253123	AC091182.1
ENSG00000177839.7	19.775	1.87167	0.915818	2.04371	0.0409818	0.999937	ENSG00000177839	PCDHB9
ENSG00000129514.8	27.8635	1.85707	0.822977	2.25653	0.0240376	0.999937	ENSG00000129514	FOXA1
ENSG00000253948.2	27.6029	1.85447	0.9067	2.04529	0.0408262	0.999937	ENSG00000253948	VPS13B-DT
ENSG00000123572.17	19.5996	1.83475	0.913674	2.0081	0.0446324	0.999937	ENSG00000123572	NRK
ENSG00000188613.7	24.432	1.83154	0.841807	2.17573	0.0295755	0.999937	ENSG00000188613	NANOS1
ENSG00000253716.6	38.1061	1.83032	0.745532	2.45506	0.0140861	0.999937	ENSG00000253716	MINCR
ENSG00000108106.14	94.6368	1.82873	0.519536	3.51993	0.000431661	0.702031	ENSG00000108106	UBE2S
ENSG00000137834.15	25.2276	1.8182	0.892169	2.03796	0.0415543	0.999937	ENSG00000137834	SMAD6
ENSG00000156218.13	36.4102	1.81746	0.717475	2.53314	0.0113047	0.999937	ENSG00000156218	ADAMTSL3
ENSG00000257084.1	59.7273	1.80531	0.654992	2.75623	0.00584719	0.999937	ENSG00000257084	MIR200CHG
ENSG00000115602.17	48.2526	1.80402	0.78119	2.30933	0.0209253	0.999937	ENSG00000115602	IL1RL1
ENSG00000266993.3	29.6352	1.78407	0.865557	2.06118	0.0392859	0.999937	ENSG00000266993	AL050343.2
ENSG00000091704.10	80.1864	1.77712	0.683812	2.59884	0.00935382	0.999937	ENSG00000091704	CPA1
ENSG00000184897.6	77.7269	1.76505	0.52642	3.35293	0.000799614	0.929939	ENSG00000184897	H1-10
ENSG00000114315.4	189.978	1.75962	0.661894	2.65846	0.00784978	0.999937	ENSG00000114315	HES1
ENSG00000125895.5	54.3447	1.75325	0.704949	2.48706	0.0128803	0.999937	ENSG00000125895	TMEM74B
ENSG00000185163.10	52.4973	1.74719	0.623228	2.80345	0.00505586	0.999937	ENSG00000185163	DDX51
ENSG00000113212.7	52.5755	1.731	0.773038	2.23921	0.025142	0.999937	ENSG00000113212	PCDHB7
ENSG00000145936.9	23.0332	1.72829	0.875356	1.97438	0.0483382	0.999937	ENSG00000145936	KCNMB1
ENSG00000214193.11	55.9941	1.71224	0.623205	2.74747	0.00600564	0.999937	ENSG00000214193	SH3D21
ENSG00000267815.1	52.1385	1.70847	0.662285	2.57966	0.00988982	0.999937	ENSG00000267815	AC008655.1
ENSG00000121068.14	64.0981	1.70296	0.706599	2.41008	0.0159491	0.999937	ENSG00000121068	TBX2
ENSG00000072818.12	41.4911	1.67298	0.691846	2.41814	0.0155999	0.999937	ENSG00000072818	ACAP1
ENSG00000129968.16	37.3111	1.67032	0.700773	2.38354	0.0171471	0.999937	ENSG00000129968	ABHD17A
ENSG00000225096.3	31.9957	1.66771	0.820409	2.03278	0.0420745	0.999937	ENSG00000225096	AL445250.1
ENSG00000184206.12	36.2099	1.65966	0.75906	2.18647	0.0287815	0.999937	ENSG00000184206	GOLGA6L4
ENSG00000115252.18	38.2136	1.63075	0.740282	2.20288	0.0276032	0.999937	ENSG00000115252	PDE1A
ENSG00000008382.16	37.6558	1.62182	0.688125	2.35687	0.0184298	0.999937	ENSG00000008382	MPND
ENSG00000156381.9	74.0131	1.61733	0.643705	2.51253	0.0119869	0.999937	ENSG00000156381	ANKRD9
ENSG00000167614.14	39.3246	1.61401	0.800749	2.01563	0.0438388	0.999937	ENSG00000167614	TTYH1
ENSG00000136492.9	55.6195	1.60461	0.660068	2.43098	0.0150582	0.999937	ENSG00000136492	BRIP1
ENSG00000130600.19	42.6894	1.60144	0.793431	2.01837	0.0435529	0.999937	ENSG00000130600	H19
ENSG00000128918.15	49.922	1.59905	0.723428	2.21039	0.0270784	0.999937	ENSG00000128918	ALDH1A2
ENSG00000152495.11	43.9882	1.58859	0.79194	2.00595	0.0448618	0.999937	ENSG00000152495	CAMK4
ENSG00000284874.1	115.321	1.58633	0.615502	2.57729	0.00995782	0.999937	ENSG00000284874	AC000093.1
ENSG00000105373.19	201.118	1.58622	0.511479	3.10124	0.00192711	0.999937	ENSG00000105373	NOP53
ENSG00000123080.12	34.6296	1.58434	0.774223	2.04636	0.0407209	0.999937	ENSG00000123080	CDKN2C
ENSG00000172006.12	44.9382	1.57599	0.650297	2.42348	0.0153724	0.999937	ENSG00000172006	ZNF554
ENSG00000277203.1	46.3137	1.5743	0.634058	2.4829	0.0130318	0.999937	ENSG00000277203	F8A1
ENSG00000269929.3	62.4628	1.57086	0.623627	2.51891	0.0117718	0.999937	ENSG00000269929	MIRLET7A1HG
ENSG00000197530.12	50.6021	1.55134	0.64763	2.39541	0.0166016	0.999937	ENSG00000197530	MIB2
ENSG00000188163.8	32.7105	1.54086	0.738739	2.0858	0.0369967	0.999937	ENSG00000188163	FAM166A
ENSG00000233117.4	40.0818	1.54069	0.777047	1.98275	0.0473959	0.999937	ENSG00000233117	LINC00702
ENSG00000185112.6	47.8259	1.5404	0.693422	2.22145	0.0263203	0.999937	ENSG00000185112	FAM43A
ENSG00000180914.10	86.9028	1.53752	0.585443	2.62624	0.00863328	0.999937	ENSG00000180914	OXTR
ENSG00000138180.16	43.9688	1.53728	0.690911	2.225	0.0260813	0.999937	ENSG00000138180	CEP55
ENSG00000184207.9	83.5323	1.53401	0.59826	2.56412	0.0103436	0.999937	ENSG00000184207	PGP
ENSG00000144908.14	49.3425	1.53364	0.747545	2.05156	0.0402121	0.999937	ENSG00000144908	ALDH1L1
ENSG00000186222.5	31.4971	1.52955	0.730071	2.09507	0.0361646	0.999937	ENSG00000186222	BLOC1S4
ENSG00000183684.8	80.0637	1.52538	0.574262	2.65624	0.00790177	0.999937	ENSG00000183684	ALYREF
ENSG00000241743.4	226.49	1.52519	0.571935	2.66672	0.00765956	0.999937	ENSG00000241743	XACT
ENSG00000068137.15	47.5388	1.52109	0.645641	2.35594	0.018476	0.999937	ENSG00000068137	PLEKHH3
ENSG00000172216.6	125.666	1.52047	0.558659	2.72164	0.00649594	0.999937	ENSG00000172216	CEBPB
ENSG00000171450.6	62.2418	1.50945	0.661649	2.28134	0.0225284	0.999937	ENSG00000171450	CDK5R2
ENSG00000281398.4	39.1205	1.50676	0.685092	2.19935	0.0278529	0.999937	ENSG00000281398	SNHG4
ENSG00000196876.18	36.654	1.50442	0.724031	2.07785	0.0377236	0.999937	ENSG00000196876	SCN8A
ENSG00000244491.1	88.3149	1.49304	0.539342	2.76825	0.00563576	0.999937	ENSG00000244491	AL021707.5
ENSG00000175467.15	212.953	1.49296	0.414463	3.60215	0.000315595	0.663417	ENSG00000175467	SART1
ENSG00000173546.7	40.1634	1.47163	0.697867	2.10876	0.0349654	0.999937	ENSG00000173546	CSPG4
ENSG00000137507.11	86.0601	1.47064	0.543918	2.70379	0.00685545	0.999937	ENSG00000137507	LRRC32
ENSG00000187713.7	53.496	1.46956	0.619468	2.37229	0.017678	0.999937	ENSG00000187713	TMEM203
ENSG00000169020.10	773.66	1.46383	0.378467	3.86779	0.000109827	0.386887	ENSG00000169020	ATP5ME
ENSG00000162894.12	196.978	1.45096	0.554691	2.6158	0.00890195	0.999937	ENSG00000162894	FCMR
ENSG00000141837.21	133.897	1.43862	0.46683	3.08169	0.00205831	0.999937	ENSG00000141837	CACNA1A
ENSG00000025708.14	302.131	1.43472	0.510799	2.80878	0.00497291	0.999937	ENSG00000025708	TYMP
ENSG00000183856.11	56.7842	1.43394	0.677141	2.11765	0.034205	0.999937	ENSG00000183856	IQGAP3
ENSG00000253522.6	54.4247	1.42423	0.697833	2.04094	0.0412569	0.999937	ENSG00000253522	MIR3142HG
ENSG00000104936.19	59.2038	1.42324	0.596436	2.38625	0.0170212	0.999937	ENSG00000104936	DMPK
ENSG00000142634.13	182.785	1.41804	0.447779	3.16683	0.0015411	0.999937	ENSG00000142634	EFHD2
ENSG00000176022.7	112.393	1.41566	0.468725	3.02023	0.0025258	0.999937	ENSG00000176022	B3GALT6
ENSG00000131037.15	134.761	1.41192	0.474866	2.9733	0.00294614	0.999937	ENSG00000131037	EPS8L1
ENSG00000116649.10	289.366	1.40833	0.462621	3.04423	0.00233276	0.999937	ENSG00000116649	SRM
ENSG00000145934.16	47.8029	1.4014	0.652482	2.1478	0.0317296	0.999937	ENSG00000145934	TENM2
ENSG00000258366.9	81.9525	1.39755	0.60339	2.31616	0.0205493	0.999937	ENSG00000258366	RTEL1
ENSG00000185262.9	67.5629	1.39597	0.61224	2.2801	0.0226015	0.999937	ENSG00000185262	UBALD2
ENSG00000287916.1	344.694	1.38316	0.378485	3.65446	0.000257728	0.632672	ENSG00000287916	AC091607.2
ENSG00000225972.1	47.5038	1.38251	0.664815	2.07954	0.037568	0.999937	ENSG00000225972	MTND1P23
ENSG00000276168.1	140.492	1.37635	0.636713	2.16164	0.0306457	0.999937	ENSG00000276168	RN7SL1
ENSG00000064687.13	61.2653	1.37241	0.577825	2.37513	0.0175428	0.999937	ENSG00000064687	ABCA7
ENSG00000103266.11	483.008	1.36685	0.390083	3.50401	0.000458316	0.702031	ENSG00000103266	STUB1
ENSG00000185361.9	41.4338	1.35873	0.676262	2.00917	0.0445189	0.999937	ENSG00000185361	TNFAIP8L1
ENSG00000104852.15	149.877	1.35702	0.506672	2.6783	0.0073997	0.999937	ENSG00000104852	SNRNP70
ENSG00000146826.17	63.7013	1.34813	0.595412	2.2642	0.0235621	0.999937	ENSG00000146826	MAP11
ENSG00000146006.8	48.559	1.34536	0.635123	2.11827	0.0341523	0.999937	ENSG00000146006	LRRTM2
ENSG00000250479.9	114.114	1.34322	0.463466	2.8982	0.00375315	0.999937	ENSG00000250479	CHCHD10
ENSG00000140988.16	2658.15	1.3428	0.384479	3.49252	0.000478489	0.706851	ENSG00000140988	RPS2
ENSG00000116774.12	46.1632	1.34244	0.6835	1.96406	0.0495229	0.999937	ENSG00000116774	OLFML3
ENSG00000117691.10	104.537	1.34092	0.489202	2.74102	0.0061248	0.999937	ENSG00000117691	NENF
ENSG00000173457.11	321.492	1.33586	0.440826	3.03037	0.00244255	0.999937	ENSG00000173457	PPP1R14B
ENSG00000142279.13	91.2334	1.33362	0.502707	2.65288	0.00798088	0.999937	ENSG00000142279	WTIP
ENSG00000049540.17	432.572	1.32846	0.451749	2.9407	0.00327472	0.999937	ENSG00000049540	ELN
ENSG00000164825.4	89.3205	1.3254	0.600952	2.20551	0.0274186	0.999937	ENSG00000164825	DEFB1
ENSG00000181409.14	88.0085	1.3244	0.521833	2.53798	0.0111494	0.999937	ENSG00000181409	AATK
ENSG00000080493.17	144.93	1.31716	0.470231	2.8011	0.00509291	0.999937	ENSG00000080493	SLC4A4
ENSG00000198482.14	76.3386	1.30934	0.547818	2.39011	0.0168434	0.999937	ENSG00000198482	ZNF808
ENSG00000080573.7	153.106	1.30644	0.590481	2.21251	0.0269316	0.999937	ENSG00000080573	COL5A3
ENSG00000234616.9	68.1914	1.30175	0.560604	2.32205	0.0202304	0.999937	ENSG00000234616	JRK
ENSG00000274422.1	98.4392	1.29927	0.589473	2.20412	0.027516	0.999937	ENSG00000274422	AC245060.5
ENSG00000141577.14	63.7593	1.29373	0.580387	2.22908	0.0258083	0.999937	ENSG00000141577	CEP131
ENSG00000060491.16	73.593	1.29275	0.586752	2.20323	0.0275784	0.999937	ENSG00000060491	OGFR
ENSG00000074047.22	71.0392	1.29242	0.648228	1.99378	0.0461761	0.999937	ENSG00000074047	GLI2
ENSG00000131747.15	463.902	1.29039	0.51216	2.5195	0.0117521	0.999937	ENSG00000131747	TOP2A
ENSG00000175602.4	143.995	1.28909	0.511353	2.52094	0.0117043	0.999937	ENSG00000175602	CCDC85B
ENSG00000242732.4	83.5292	1.28498	0.639692	2.00874	0.0445643	0.999937	ENSG00000242732	RTL5
ENSG00000182472.9	144.779	1.27938	0.467646	2.73578	0.0062232	0.999937	ENSG00000182472	CAPN12
ENSG00000159335.18	257.949	1.27816	0.385384	3.31658	0.000911281	0.948457	ENSG00000159335	PTMS
ENSG00000287160.1	178.949	1.27781	0.52758	2.42202	0.0154343	0.999937	ENSG00000287160	Z82195.3
ENSG00000168807.16	183.868	1.27186	0.464582	2.73764	0.00618826	0.999937	ENSG00000168807	SNTB2
ENSG00000125503.13	125.072	1.26652	0.50418	2.51203	0.0120038	0.999937	ENSG00000125503	PPP1R12C
ENSG00000197182.14	44.6549	1.26535	0.638635	1.98134	0.0475529	0.999937	ENSG00000197182	MIRLET7BHG
ENSG00000103260.9	72.2378	1.25523	0.60367	2.07932	0.0375875	0.999937	ENSG00000103260	METRN
ENSG00000154124.5	162.033	1.24805	0.55565	2.24611	0.024697	0.999937	ENSG00000154124	OTULIN
ENSG00000006016.11	83.6414	1.24633	0.534683	2.33098	0.0197546	0.999937	ENSG00000006016	CRLF1
ENSG00000060069.17	65.5272	1.24481	0.581243	2.14164	0.0322223	0.999937	ENSG00000060069	CTDP1
ENSG00000174749.6	61.2029	1.23138	0.581738	2.11673	0.0342828	0.999937	ENSG00000174749	FAM241A
ENSG00000248690.8	69.0341	1.22911	0.586652	2.09513	0.0361597	0.999937	ENSG00000248690	HAS2-AS1
ENSG00000176788.9	130.891	1.22798	0.496827	2.47165	0.0134491	0.999937	ENSG00000176788	BASP1
ENSG00000077150.20	310.076	1.22545	0.382749	3.20171	0.00136612	0.999937	ENSG00000077150	NFKB2
ENSG00000100968.14	130.099	1.22027	0.446148	2.73513	0.0062355	0.999937	ENSG00000100968	NFATC4
ENSG00000138778.13	138.938	1.21885	0.513901	2.37175	0.017704	0.999937	ENSG00000138778	CENPE
ENSG00000261716.2	64.047	1.21842	0.611443	1.99269	0.0462952	0.999937	ENSG00000261716	H2BC20P
ENSG00000167978.17	738.152	1.21019	0.37933	3.19034	0.00142106	0.999937	ENSG00000167978	SRRM2
ENSG00000228315.12	108.491	1.20307	0.4822	2.49496	0.0125971	0.999937	ENSG00000228315	GUSBP11
ENSG00000148426.13	103.788	1.20236	0.549901	2.1865	0.0287791	0.999937	ENSG00000148426	PROSER2
ENSG00000159210.10	218.669	1.20218	0.443337	2.71167	0.00669455	0.999937	ENSG00000159210	SNF8
ENSG00000133107.15	71.4758	1.19694	0.589513	2.03039	0.042317	0.999937	ENSG00000133107	TRPC4
ENSG00000151150.22	86.4862	1.19581	0.527589	2.26656	0.0234173	0.999937	ENSG00000151150	ANK3
ENSG00000182512.5	70.6755	1.19249	0.543016	2.19604	0.028089	0.999937	ENSG00000182512	GLRX5
ENSG00000164713.10	284.008	1.18888	0.40337	2.94736	0.00320499	0.999937	ENSG00000164713	BRI3
ENSG00000104059.4	78.9165	1.18832	0.526968	2.25501	0.0241324	0.999937	ENSG00000104059	FAM189A1
ENSG00000255031.5	67.5267	1.18353	0.550077	2.15157	0.0314313	0.999937	ENSG00000255031	AP002807.1
ENSG00000125817.8	221.578	1.18319	0.433559	2.72901	0.00635244	0.999937	ENSG00000125817	CENPB
ENSG00000110046.13	172.643	1.15687	0.461499	2.50678	0.0121837	0.999937	ENSG00000110046	ATG2A
ENSG00000162783.11	160.664	1.15485	0.585479	1.97249	0.0485535	0.999937	ENSG00000162783	IER5
ENSG00000134905.17	122.036	1.15457	0.464561	2.48529	0.0129447	0.999937	ENSG00000134905	CARS2
ENSG00000184368.16	80.7744	1.15297	0.554909	2.07777	0.037731	0.999937	ENSG00000184368	MAP7D2
ENSG00000114270.17	450.756	1.15019	0.395022	2.91171	0.00359461	0.999937	ENSG00000114270	COL7A1
ENSG00000104824.17	269.451	1.15	0.421948	2.72545	0.00642131	0.999937	ENSG00000104824	HNRNPL
ENSG00000182636.8	84.8393	1.1477	0.541614	2.11903	0.0340877	0.999937	ENSG00000182636	NDN
ENSG00000154229.12	220.099	1.14595	0.394792	2.90268	0.00369983	0.999937	ENSG00000154229	PRKCA
ENSG00000198816.7	102.663	1.14535	0.473953	2.41659	0.0156667	0.999937	ENSG00000198816	ZNF358
ENSG00000140832.10	61.626	1.14496	0.563871	2.03053	0.042303	0.999937	ENSG00000140832	MARVELD3
ENSG00000136830.12	998.903	1.14365	0.356407	3.20884	0.0013327	0.999937	ENSG00000136830	NIBAN2
ENSG00000203727.4	114.924	1.14129	0.456906	2.49787	0.0124941	0.999937	ENSG00000203727	SAMD5
ENSG00000167615.16	210.346	1.13936	0.401711	2.83628	0.0045643	0.999937	ENSG00000167615	LENG8
ENSG00000007520.4	120.415	1.13638	0.51813	2.19324	0.0282904	0.999937	ENSG00000007520	TSR3
ENSG00000180543.5	111.296	1.13564	0.499056	2.27557	0.0228716	0.999937	ENSG00000180543	TSPYL5
ENSG00000197694.18	1161.91	1.13085	0.392202	2.88335	0.00393476	0.999937	ENSG00000197694	SPTAN1
ENSG00000198840.2	451.352	1.1271	0.465758	2.41992	0.015524	0.999937	ENSG00000198840	MT-ND3
ENSG00000210151.2	69.963	1.12673	0.572843	1.96691	0.0491935	0.999937	ENSG00000210151	MT-TS1
ENSG00000117676.14	132.751	1.12306	0.455781	2.46403	0.0137386	0.999937	ENSG00000117676	RPS6KA1
ENSG00000226479.4	127.012	1.12283	0.495736	2.26497	0.0235146	0.999937	ENSG00000226479	TMEM185B
ENSG00000076382.17	187.968	1.12108	0.506673	2.21263	0.0269232	0.999937	ENSG00000076382	SPAG5
ENSG00000244306.11	121.365	1.12101	0.558675	2.00654	0.0447982	0.999937	ENSG00000244306	DUXAP10
ENSG00000051128.19	167.262	1.11896	0.42722	2.61917	0.00881446	0.999937	ENSG00000051128	HOMER3
ENSG00000116641.18	402.807	1.11529	0.377672	2.95307	0.00314632	0.999937	ENSG00000116641	DOCK7
ENSG00000242265.5	912.472	1.10246	0.362816	3.03861	0.00237671	0.999937	ENSG00000242265	PEG10
ENSG00000065534.19	1352.68	1.10198	0.408027	2.70075	0.00691828	0.999937	ENSG00000065534	MYLK
ENSG00000110917.8	1020.34	1.10122	0.367729	2.99466	0.00274748	0.999937	ENSG00000110917	MLEC
ENSG00000277701.5	84.4699	1.09713	0.533902	2.05492	0.0398866	0.999937	ENSG00000277701	AC159540.2
ENSG00000132464.13	97.5094	1.097	0.552996	1.98374	0.0472847	0.999937	ENSG00000132464	ENAM
ENSG00000213741.11	575.365	1.08671	0.44513	2.44134	0.0146328	0.999937	ENSG00000213741	RPS29
ENSG00000237988.5	123.333	1.08647	0.520671	2.08667	0.0369179	0.999937	ENSG00000237988	OR2I1P
ENSG00000099804.9	199.699	1.08457	0.448865	2.41624	0.0156817	0.999937	ENSG00000099804	CDC34
ENSG00000130522.6	250.2	1.08349	0.449685	2.40944	0.0159771	0.999937	ENSG00000130522	JUND
ENSG00000141858.12	106.827	1.08335	0.487783	2.22096	0.0263537	0.999937	ENSG00000141858	SAMD1
ENSG00000185340.15	76.4867	1.08212	0.545359	1.98423	0.0472305	0.999937	ENSG00000185340	GAS2L1
ENSG00000103196.12	672.327	1.0818	0.4143	2.61115	0.0090237	0.999937	ENSG00000103196	CRISPLD2
ENSG00000196275.14	96.3203	1.08152	0.536128	2.01728	0.0436662	0.999937	ENSG00000196275	GTF2IRD2
ENSG00000136167.15	505.159	1.07991	0.463191	2.33145	0.0197296	0.999937	ENSG00000136167	LCP1
ENSG00000111490.15	80.8716	1.07644	0.51107	2.10624	0.0351836	0.999937	ENSG00000111490	TBC1D30
ENSG00000115808.12	154.491	1.06912	0.529672	2.01845	0.0435444	0.999937	ENSG00000115808	STRN
ENSG00000264364.3	135.998	1.06837	0.469278	2.27662	0.022809	0.999937	ENSG00000264364	DYNLL2
ENSG00000214753.4	124.963	1.06685	0.469252	2.27352	0.022995	0.999937	ENSG00000214753	HNRNPUL2
ENSG00000244380.1	97.2651	1.06658	0.491934	2.16812	0.0301492	0.999937	ENSG00000244380	AC134772.1
ENSG00000130511.16	92.0566	1.06657	0.488083	2.18522	0.0288731	0.999937	ENSG00000130511	SSBP4
ENSG00000229833.10	290.179	1.06427	0.382532	2.78216	0.00539978	0.999937	ENSG00000229833	PET100
ENSG00000158747.15	590.352	1.06425	0.383192	2.77733	0.00548077	0.999937	ENSG00000158747	NBL1
ENSG00000172037.14	485.868	1.06303	0.418667	2.53908	0.0111143	0.999937	ENSG00000172037	LAMB2
ENSG00000090470.15	99.5299	1.06125	0.538006	1.97256	0.0485452	0.999937	ENSG00000090470	PDCD7
ENSG00000145919.11	164.579	1.0607	0.49549	2.14071	0.0322972	0.999937	ENSG00000145919	BOD1
ENSG00000109805.10	154.068	1.05728	0.502578	2.10371	0.0354035	0.999937	ENSG00000109805	NCAPG
ENSG00000286190.2	284.411	1.05524	0.44195	2.3877	0.0169543	0.999937	ENSG00000286190	AC055839.2
ENSG00000164040.18	280.359	1.05344	0.394046	2.6734	0.00750859	0.999937	ENSG00000164040	PGRMC2
ENSG00000170004.17	498.434	1.05227	0.412437	2.55136	0.0107305	0.999937	ENSG00000170004	CHD3
ENSG00000183963.18	799.592	1.05129	0.418863	2.50986	0.0120778	0.999937	ENSG00000183963	SMTN
ENSG00000125730.17	757.181	1.0481	0.357722	2.92993	0.00339042	0.999937	ENSG00000125730	C3
ENSG00000198535.5	339.923	1.04555	0.454608	2.2999	0.021454	0.999937	ENSG00000198535	C2CD4A
ENSG00000160256.13	82.7774	1.03907	0.529525	1.96227	0.0497313	0.999937	ENSG00000160256	FAM207A
ENSG00000182325.11	111.29	1.03652	0.501529	2.06672	0.0387604	0.999937	ENSG00000182325	FBXL6
ENSG00000141582.15	113.691	1.03608	0.494519	2.09512	0.0361602	0.999937	ENSG00000141582	CBX4
ENSG00000123144.11	305.221	1.0355	0.397661	2.60398	0.0092149	0.999937	ENSG00000123144	TRIR
ENSG00000118094.12	100.42	1.03543	0.48039	2.15539	0.0311316	0.999937	ENSG00000118094	TREH
ENSG00000258232.2	446.96	1.03059	0.34994	2.94506	0.00322887	0.999937	ENSG00000258232	AC125611.3
ENSG00000180921.7	77.3223	1.02963	0.522629	1.9701	0.0488272	0.999937	ENSG00000180921	FAM83H
ENSG00000233927.5	420.469	1.02768	0.450962	2.27886	0.0226756	0.999937	ENSG00000233927	RPS28
ENSG00000152082.15	187.134	1.0263	0.406501	2.52473	0.0115788	0.999937	ENSG00000152082	MZT2B
ENSG00000141052.18	130.085	1.02292	0.503113	2.03317	0.0420351	0.999937	ENSG00000141052	MYOCD
ENSG00000110107.9	152.118	1.02043	0.434144	2.35045	0.0187508	0.999937	ENSG00000110107	PRPF19
ENSG00000214022.11	234.244	1.01682	0.404691	2.51259	0.0119848	0.999937	ENSG00000214022	REPIN1
ENSG00000141759.15	200.961	1.00934	0.429003	2.35276	0.0186344	0.999937	ENSG00000141759	TXNL4A
ENSG00000147324.11	360.958	1.00923	0.44433	2.27136	0.0231253	0.999937	ENSG00000147324	MFHAS1
ENSG00000173020.11	220.296	1.00919	0.426074	2.36858	0.0178565	0.999937	ENSG00000173020	GRK2
ENSG00000240342.3	262.101	1.00691	0.40738	2.47168	0.0134481	0.999937	ENSG00000240342	RPS2P5
ENSG00000204394.13	397.052	1.00579	0.383103	2.62537	0.00865545	0.999937	ENSG00000204394	VARS1
ENSG00000171992.13	239.586	1.00457	0.457077	2.19782	0.0279617	0.999937	ENSG00000171992	SYNPO
ENSG00000116871.15	327.015	0.999118	0.383121	2.60784	0.00911148	0.999937	ENSG00000116871	MAP7D1
ENSG00000006118.15	509.128	0.997078	0.367496	2.71317	0.00666437	0.999937	ENSG00000006118	TMEM132A
ENSG00000204388.7	2885.7	0.985002	0.482455	2.04164	0.0411869	0.999937	ENSG00000204388	HSPA1B
ENSG00000115457.10	298.789	0.981746	0.370581	2.64921	0.00806808	0.999937	ENSG00000115457	IGFBP2
ENSG00000171241.9	241.188	0.978463	0.468626	2.08794	0.0368035	0.999937	ENSG00000171241	SHCBP1
ENSG00000144554.11	103.413	0.972924	0.491906	1.97786	0.0479439	0.999937	ENSG00000144554	FANCD2
ENSG00000213923.13	412.266	0.962141	0.389183	2.47221	0.0134281	0.999937	ENSG00000213923	CSNK1E
ENSG00000169627.9	240.712	0.961477	0.394362	2.43806	0.0147664	0.999937	ENSG00000169627	BOLA2B
ENSG00000073350.14	273.738	0.953832	0.394655	2.41687	0.0156544	0.999937	ENSG00000073350	LLGL2
ENSG00000196739.15	136.669	0.953797	0.454668	2.09779	0.0359237	0.999937	ENSG00000196739	COL27A1
ENSG00000141524.16	106.364	0.953585	0.485032	1.96602	0.0492958	0.999937	ENSG00000141524	TMC6
ENSG00000185000.12	102.728	0.951808	0.480536	1.98072	0.0476224	0.999937	ENSG00000185000	DGAT1
ENSG00000121774.18	503.509	0.950734	0.352987	2.6934	0.00707275	0.999937	ENSG00000121774	KHDRBS1
ENSG00000123143.13	691.724	0.950175	0.449091	2.11577	0.034364	0.999937	ENSG00000123143	PKN1
ENSG00000062822.15	171.716	0.949892	0.468187	2.02887	0.0424714	0.999937	ENSG00000062822	POLD1
ENSG00000099821.14	281.891	0.946757	0.472594	2.00332	0.0451429	0.999937	ENSG00000099821	POLRMT
ENSG00000179403.12	216.434	0.944725	0.438959	2.15219	0.0313821	0.999937	ENSG00000179403	VWA1
ENSG00000185129.8	378.479	0.944492	0.379098	2.49142	0.0127234	0.999937	ENSG00000185129	PURA
ENSG00000156802.13	264.169	0.940942	0.438229	2.14715	0.0317816	0.999937	ENSG00000156802	ATAD2
ENSG00000169926.11	194.16	0.939025	0.457458	2.0527	0.0401016	0.999937	ENSG00000169926	KLF13
ENSG00000253368.4	198.188	0.937747	0.402482	2.32991	0.0198107	0.999937	ENSG00000253368	TRNP1
ENSG00000171853.16	117.221	0.937071	0.468367	2.00072	0.0454226	0.999937	ENSG00000171853	TRAPPC12
ENSG00000128564.7	949.681	0.933842	0.319472	2.92309	0.00346582	0.999937	ENSG00000128564	VGF
ENSG00000168268.11	484.609	0.931739	0.458952	2.03015	0.0423416	0.999937	ENSG00000168268	NT5DC2
ENSG00000196924.18	5219.14	0.929489	0.343263	2.7078	0.00677302	0.999937	ENSG00000196924	FLNA
ENSG00000161618.10	159.649	0.92707	0.430353	2.15421	0.0312239	0.999937	ENSG00000161618	ALDH16A1
ENSG00000265784.1	125.313	0.926215	0.470263	1.96957	0.0488879	0.999937	ENSG00000265784	AC006441.3
ENSG00000175826.12	365.84	0.922352	0.403212	2.28751	0.0221658	0.999937	ENSG00000175826	CTDNEP1
ENSG00000158545.16	199.229	0.921358	0.461747	1.99537	0.0460021	0.999937	ENSG00000158545	ZC3H18
ENSG00000019144.19	328.477	0.919869	0.421492	2.18241	0.0290792	0.999937	ENSG00000019144	PHLDB1
ENSG00000171858.18	535.682	0.916616	0.442181	2.07294	0.0381777	0.999937	ENSG00000171858	RPS21
ENSG00000111786.9	452.177	0.910774	0.359355	2.53447	0.0112618	0.999937	ENSG00000111786	SRSF9
ENSG00000142173.16	1835.64	0.90966	0.350809	2.59304	0.00951327	0.999937	ENSG00000142173	COL6A2
ENSG00000271383.7	615.61	0.908146	0.378301	2.40059	0.0163685	0.999937	ENSG00000271383	NBPF19
ENSG00000164889.14	715.482	0.903559	0.389006	2.32274	0.0201932	0.999937	ENSG00000164889	SLC4A2
ENSG00000187942.12	647.877	0.901582	0.425448	2.11913	0.0340792	0.999937	ENSG00000187942	LDLRAD2
ENSG00000116396.15	132.757	0.899508	0.448305	2.00646	0.0448068	0.999937	ENSG00000116396	KCNC4
ENSG00000197451.12	311.128	0.896911	0.377863	2.37364	0.0176137	0.999937	ENSG00000197451	HNRNPAB
ENSG00000133030.22	872.764	0.895034	0.373289	2.3977	0.0164984	0.999937	ENSG00000133030	MPRIP
ENSG00000183648.11	236.275	0.894159	0.386181	2.31539	0.0205918	0.999937	ENSG00000183648	NDUFB1
ENSG00000126709.15	217.684	0.888856	0.430889	2.06284	0.0391276	0.999937	ENSG00000126709	IFI6
ENSG00000065882.16	293.204	0.883598	0.404586	2.18395	0.0289657	0.999937	ENSG00000065882	TBC1D1
ENSG00000172809.13	1056.1	0.879807	0.358959	2.451	0.0142462	0.999937	ENSG00000172809	RPL38
ENSG00000169718.18	173.375	0.876893	0.4353	2.01446	0.0439615	0.999937	ENSG00000169718	DUS1L
ENSG00000105357.18	265.269	0.87629	0.382602	2.29034	0.0220014	0.999937	ENSG00000105357	MYH14
ENSG00000032444.17	642.054	0.874144	0.377225	2.3173	0.0204872	0.999937	ENSG00000032444	PNPLA6
ENSG00000164292.13	763.723	0.873605	0.362911	2.40721	0.0160748	0.999937	ENSG00000164292	RHOBTB3
ENSG00000138668.19	600.196	0.868039	0.34327	2.52873	0.0114475	0.999937	ENSG00000138668	HNRNPD
ENSG00000149418.11	522.334	0.867042	0.339326	2.55519	0.010613	0.999937	ENSG00000149418	ST14
ENSG00000197785.14	242.445	0.864783	0.404356	2.13867	0.0324627	0.999937	ENSG00000197785	ATAD3A
ENSG00000196642.19	347.836	0.862465	0.399913	2.15663	0.0310346	0.999937	ENSG00000196642	RABL6
ENSG00000102882.12	174.568	0.860918	0.416527	2.0669	0.0387439	0.999937	ENSG00000102882	MAPK3
ENSG00000125755.19	408.469	0.86005	0.382028	2.25127	0.0243681	0.999937	ENSG00000125755	SYMPK
ENSG00000125995.16	1155.55	0.855958	0.355264	2.40936	0.0159807	0.999937	ENSG00000125995	ROMO1
ENSG00000184110.15	3217.29	0.852009	0.35563	2.39578	0.0165852	0.999937	ENSG00000184110	EIF3C
ENSG00000175416.15	567.499	0.849684	0.365521	2.32458	0.0200942	0.999937	ENSG00000175416	CLTB
ENSG00000142599.19	310.644	0.845033	0.426548	1.9811	0.0475804	0.999937	ENSG00000142599	RERE
ENSG00000267795.6	314.796	0.843486	0.395892	2.1306	0.0331224	0.999937	ENSG00000267795	SMIM22
ENSG00000164880.16	376.73	0.84287	0.391397	2.15349	0.03128	0.999937	ENSG00000164880	INTS1
ENSG00000161091.13	232.297	0.836644	0.394583	2.12032	0.0339787	0.999937	ENSG00000161091	MFSD12
ENSG00000176407.18	403.474	0.836321	0.375541	2.22698	0.0259489	0.999937	ENSG00000176407	KCMF1
ENSG00000148411.8	187.734	0.834687	0.403693	2.06763	0.0386749	0.999937	ENSG00000148411	NACC2
ENSG00000170906.16	460.309	0.834496	0.348524	2.39437	0.0166489	0.999937	ENSG00000170906	NDUFA3
ENSG00000112769.20	368.172	0.82991	0.401761	2.06568	0.0388584	0.999937	ENSG00000112769	LAMA4
ENSG00000214655.11	285.031	0.828929	0.386477	2.14483	0.0319662	0.999937	ENSG00000214655	ZSWIM8
ENSG00000126822.17	439.569	0.828802	0.379647	2.18308	0.0290297	0.999937	ENSG00000126822	PLEKHG3
ENSG00000168028.14	2858.89	0.82784	0.39794	2.08031	0.0374968	0.999937	ENSG00000168028	RPSA
ENSG00000089280.19	1008.89	0.823088	0.328686	2.50418	0.0122736	0.999937	ENSG00000089280	FUS
ENSG00000099331.13	254.507	0.818823	0.387833	2.11128	0.0347484	0.999937	ENSG00000099331	MYO9B
ENSG00000182087.14	256.54	0.818583	0.379192	2.15875	0.0308693	0.999937	ENSG00000182087	TMEM259
ENSG00000167658.16	7651.4	0.814684	0.357879	2.27642	0.0228209	0.999937	ENSG00000167658	EEF2
ENSG00000167193.8	701.25	0.814327	0.377905	2.15484	0.031174	0.999937	ENSG00000167193	CRK
ENSG00000108424.10	2533.02	0.81268	0.321921	2.52447	0.0115873	0.999937	ENSG00000108424	KPNB1
ENSG00000198517.10	181.495	0.812306	0.406694	1.99734	0.0457881	0.999937	ENSG00000198517	MAFK
ENSG00000126247.11	802.445	0.81217	0.375615	2.16224	0.0305995	0.999937	ENSG00000126247	CAPNS1
ENSG00000179818.14	1262.13	0.812129	0.402786	2.01628	0.0437709	0.999937	ENSG00000179818	PCBP1-AS1
ENSG00000063660.9	303.739	0.811875	0.398657	2.03652	0.0416979	0.999937	ENSG00000063660	GPC1
ENSG00000080371.6	568.073	0.811531	0.410549	1.9767	0.0480757	0.999937	ENSG00000080371	RAB21
ENSG00000100836.10	301.452	0.811112	0.395449	2.05111	0.0402558	0.999937	ENSG00000100836	PABPN1
ENSG00000197756.10	1414.81	0.804057	0.379383	2.11938	0.0340586	0.999937	ENSG00000197756	RPL37A
ENSG00000148677.7	3190.38	0.787345	0.386478	2.03723	0.0416269	0.999937	ENSG00000148677	ANKRD1
ENSG00000051620.11	357.729	0.780049	0.388483	2.00793	0.0446502	0.999937	ENSG00000051620	HEBP2
ENSG00000104960.15	342.014	0.776035	0.380397	2.04007	0.0413438	0.999937	ENSG00000104960	PTOV1
ENSG00000143537.14	392.64	0.775654	0.358072	2.16619	0.0302963	0.999937	ENSG00000143537	ADAM15
ENSG00000125648.15	264.708	0.774383	0.393128	1.9698	0.0488615	0.999937	ENSG00000125648	SLC25A23
ENSG00000169871.13	504.867	0.757057	0.347645	2.17767	0.0294306	0.999937	ENSG00000169871	TRIM56
ENSG00000177469.13	1905.46	0.754548	0.33291	2.26652	0.0234195	0.999937	ENSG00000177469	CAVIN1
ENSG00000100242.15	478.165	0.751271	0.351257	2.1388	0.0324515	0.999937	ENSG00000100242	SUN2
ENSG00000071655.18	479.619	0.750052	0.361648	2.07399	0.0380806	0.999937	ENSG00000071655	MBD3
ENSG00000168488.18	417.395	0.743236	0.346032	2.14789	0.0317229	0.999937	ENSG00000168488	ATXN2L
ENSG00000130726.12	904.669	0.738221	0.368301	2.0044	0.0450275	0.999937	ENSG00000130726	TRIM28
ENSG00000170144.20	1186.01	0.733085	0.369158	1.98583	0.0470523	0.999937	ENSG00000170144	HNRNPA3
ENSG00000162614.19	562.178	0.724334	0.348669	2.07743	0.0377623	0.999937	ENSG00000162614	NEXN
ENSG00000141753.7	708.069	0.712894	0.343164	2.07741	0.0377634	0.999937	ENSG00000141753	IGFBP4
ENSG00000114353.17	949.723	0.711572	0.323059	2.20261	0.0276224	0.999937	ENSG00000114353	GNAI2
ENSG00000184216.14	883.375	0.707231	0.338016	2.0923	0.0364115	0.999937	ENSG00000184216	IRAK1
ENSG00000103495.14	522.977	0.702918	0.351851	1.99777	0.0457415	0.999937	ENSG00000103495	MAZ
ENSG00000127616.19	1053.88	0.696027	0.343395	2.0269	0.0426729	0.999937	ENSG00000127616	SMARCA4
ENSG00000232112.3	1720.25	0.695818	0.341568	2.03713	0.0416369	0.999937	ENSG00000232112	TMA7
ENSG00000161671.17	714.478	0.683067	0.343425	1.98898	0.0467029	0.999937	ENSG00000161671	EMC10
ENSG00000238045.9	449.99	0.681005	0.346453	1.96565	0.0493395	0.999937	ENSG00000238045	AC009133.1
ENSG00000179218.14	4110.73	0.63006	0.315801	1.99512	0.0460301	0.999937	ENSG00000179218	CALR

## Sheet: DownReg<0.05
Supplemental Table 7. Genes down-regulated (p-value <0.05, baseMean >10 RPKM) in human islets infected with pAd-MIR125B versus control
Gene.stable.ID.version	baseMean	log2FoldChange	lfcSE	stat	pvalue	padj	Gene.stable.ID	Gene.name
ENSG00000283809.1	10.7616	-4.11055	1.58579	-2.59212	0.0095386	0.999937	ENSG00000283809	AC007326.4
ENSG00000188629.13	12.0654	-4.34742	1.52523	-2.85033	0.00436737	0.999937	ENSG00000188629	ZNF177
ENSG00000203761.5	12.4508	-2.6928	1.24492	-2.16302	0.0305395	0.999937	ENSG00000203761	MSTO2P
ENSG00000261611.6	13.0149	-2.54914	1.21525	-2.09763	0.0359375	0.999937	ENSG00000261611	AC010547.4
ENSG00000163736.4	14.3915	-3.55474	1.28517	-2.76596	0.00567552	0.999937	ENSG00000163736	PPBP
ENSG00000270882.2	15.7126	-3.68426	1.54239	-2.38867	0.0169094	0.999937	ENSG00000270882	H4C14
ENSG00000179978.11	17.4541	-2.37141	1.1393	-2.08146	0.0373921	0.999937	ENSG00000179978	NAIPP2
ENSG00000260404.3	17.6979	-3.53218	1.09229	-3.23372	0.00122189	0.999937	ENSG00000260404	AC110079.1
ENSG00000135477.11	18.4838	-2.32011	1.18166	-1.96343	0.0495957	0.999937	ENSG00000135477	KRT87P
ENSG00000250111.3	20.3575	-8.00394	3.84693	-2.08061	0.0374701	0.999937	ENSG00000250111	AC107982.1
ENSG00000286053.2	20.9839	-3.14155	1.06029	-2.96292	0.00304734	0.999937	ENSG00000286053	ASDURF
ENSG00000249481.7	21.2726	-2.73418	1.09041	-2.50747	0.0121599	0.999937	ENSG00000249481	SPATS1
ENSG00000259075.6	26.5339	-2.07548	1.0556	-1.96616	0.0492797	0.999937	ENSG00000259075	POC1B-GALNT4
ENSG00000283765.1	26.6032	-3.22965	1.14465	-2.82152	0.00477963	0.999937	ENSG00000283765	AC131160.1
ENSG00000254806.5	27.2363	-3.78435	1.04064	-3.63656	0.000276306	0.632672	ENSG00000254806	SYS1-DBNDD2
ENSG00000165325.13	28.6753	-2.0854	0.927426	-2.24858	0.0245389	0.999937	ENSG00000165325	DEUP1
ENSG00000234851.4	29.5754	-2.99075	1.03744	-2.88282	0.00394127	0.999937	ENSG00000234851	RPL23AP42
ENSG00000267308.3	29.6369	-2.90199	1.14557	-2.53323	0.0113017	0.999937	ENSG00000267308	LINC01764
ENSG00000213963.6	30.9625	-1.77007	0.83031	-2.13181	0.0330221	0.999937	ENSG00000213963	AC019080.1
ENSG00000214435.8	31.3858	-2.61902	0.985863	-2.65657	0.00789393	0.999937	ENSG00000214435	AS3MT
ENSG00000253816.3	32.4191	-2.05073	0.892516	-2.2977	0.0215788	0.999937	ENSG00000253816	AC138866.1
ENSG00000257529.5	34.3457	-6.49991	2.60157	-2.49846	0.0124735	0.999937	ENSG00000257529	RPL36A-HNRNPH2
ENSG00000118690.13	34.6957	-2.00729	0.784382	-2.55907	0.0104952	0.999937	ENSG00000118690	ARMC2
ENSG00000286239.1	36.4535	-5.43641	1.20293	-4.51931	6.2e-06	0.0710309	ENSG00000286239	AC093884.1
ENSG00000224831.3	41.1137	-2.40001	0.862897	-2.78135	0.0054134	0.999937	ENSG00000224831	TMEM183B
ENSG00000262633.2	41.2144	-2.89242	0.847302	-3.41368	0.000640921	0.848332	ENSG00000262633	AC005670.2
ENSG00000275163.1	41.7399	-2.76935	0.920494	-3.00855	0.00262495	0.999937	ENSG00000275163	AC117457.1
ENSG00000283886.3	42.0558	-2.64122	0.990775	-2.66581	0.00768036	0.999937	ENSG00000283886	BX664615.2
ENSG00000284292.1	44.4988	-1.66903	0.834755	-1.99943	0.0455618	0.999937	ENSG00000284292	AC004922.1
ENSG00000261553.5	44.5036	-1.30386	0.632219	-2.06236	0.0391735	0.999937	ENSG00000261553	AL137782.1
ENSG00000134297.6	47.084	-1.43023	0.640199	-2.23404	0.0254805	0.999937	ENSG00000134297	PLEKHA8P1
ENSG00000143382.15	48.5421	-1.33838	0.6606	-2.02601	0.0427639	0.999937	ENSG00000143382	ADAMTSL4
ENSG00000175449.14	49.1628	-1.73196	0.642046	-2.69755	0.00698509	0.999937	ENSG00000175449	RFESD
ENSG00000241313.3	49.7548	-1.41532	0.629923	-2.24682	0.0246515	0.999937	ENSG00000241313	WWTR1-AS1
ENSG00000131944.10	50.6472	-1.20811	0.612859	-1.97128	0.0486921	0.999937	ENSG00000131944	FAAP24
ENSG00000170356.9	51.4249	-1.5005	0.635798	-2.36003	0.0182735	0.999937	ENSG00000170356	OR2A20P
ENSG00000171817.17	51.5129	-1.51701	0.622443	-2.43718	0.0148022	0.999937	ENSG00000171817	ZNF540
ENSG00000108984.15	55.6196	-1.42681	0.594319	-2.40074	0.0163619	0.999937	ENSG00000108984	MAP2K6
ENSG00000135537.17	57.21	-1.70206	0.660512	-2.57688	0.00996968	0.999937	ENSG00000135537	AFG1L
ENSG00000183621.15	57.7418	-1.29476	0.619246	-2.09087	0.03654	0.999937	ENSG00000183621	ZNF438
ENSG00000270117.1	57.7908	-2.14424	0.711307	-3.0145	0.002574	0.999937	ENSG00000270117	AP000769.2
ENSG00000121316.11	57.8101	-1.33624	0.644076	-2.07465	0.0380187	0.999937	ENSG00000121316	PLBD1
ENSG00000124208.16	59.8073	-9.69708	3.8452	-2.52186	0.0116735	0.999937	ENSG00000124208	TMEM189-UBE2V1
ENSG00000138030.13	59.9127	-1.2295	0.584651	-2.10297	0.0354685	0.999937	ENSG00000138030	KHK
ENSG00000227232.5	60.3313	-1.64277	0.744971	-2.20515	0.0274436	0.999937	ENSG00000227232	WASH7P
ENSG00000256034.1	62.0031	-1.67292	0.640725	-2.61098	0.00902821	0.999937	ENSG00000256034	AP002770.1
ENSG00000243406.6	63.2056	-1.25759	0.571986	-2.19863	0.0279043	0.999937	ENSG00000243406	MRPS31P5
ENSG00000169220.18	63.77	-1.22585	0.597132	-2.0529	0.040082	0.999937	ENSG00000169220	RGS14
ENSG00000127081.14	67.9951	-1.40863	0.553351	-2.54564	0.0109078	0.999937	ENSG00000127081	ZNF484
ENSG00000204711.9	70.8821	-1.25214	0.63663	-1.96682	0.0492041	0.999937	ENSG00000204711	C9orf135
ENSG00000137101.13	71.9122	-1.239	0.579394	-2.13844	0.0324814	0.999937	ENSG00000137101	CD72
ENSG00000170425.3	75.6235	-1.12397	0.551621	-2.03758	0.0415924	0.999937	ENSG00000170425	ADORA2B
ENSG00000185250.16	77.7908	-1.32234	0.537282	-2.46118	0.0138482	0.999937	ENSG00000185250	PPIL6
ENSG00000204179.10	79.2645	-1.21326	0.544897	-2.22658	0.0259756	0.999937	ENSG00000204179	PTPN20
ENSG00000216937.13	79.3179	-1.12704	0.549333	-2.05165	0.0402037	0.999937	ENSG00000216937	CCDC7
ENSG00000135472.9	80.2719	-1.08138	0.551305	-1.96148	0.0498227	0.999937	ENSG00000135472	FAIM2
ENSG00000136943.11	80.4554	-1.37427	0.585819	-2.3459	0.0189813	0.999937	ENSG00000136943	CTSV
ENSG00000259924.1	80.9071	-1.23046	0.610374	-2.01592	0.0438088	0.999937	ENSG00000259924	AC011939.1
ENSG00000145416.13	81.2889	-1.26305	0.51062	-2.47356	0.0133775	0.999937	ENSG00000145416	MARCHF1
ENSG00000185304.15	82.1035	-4.34935	1.89083	-2.30024	0.0214349	0.999937	ENSG00000185304	RGPD2
ENSG00000122585.8	83.8718	-1.34186	0.672375	-1.99571	0.0459656	0.999937	ENSG00000122585	NPY
ENSG00000283761.1	84.5334	-1.81823	0.526799	-3.45148	0.000557529	0.797876	ENSG00000283761	AC118553.2
ENSG00000188611.15	84.745	-1.579	0.606133	-2.60505	0.00918621	0.999937	ENSG00000188611	ASAH2
ENSG00000182141.10	88.2747	-1.73641	0.583223	-2.97727	0.00290825	0.999937	ENSG00000182141	ZNF708
ENSG00000265590.10	89.1178	-1.67305	0.647279	-2.58474	0.00974532	0.999937	ENSG00000265590	CFAP298-TCP10L
ENSG00000108924.14	91.2725	-1.51746	0.503655	-3.01289	0.00258772	0.999937	ENSG00000108924	HLF
ENSG00000241489.8	92.0654	-1.32325	0.623617	-2.1219	0.0338461	0.999937	ENSG00000241489	AC244197.3
ENSG00000237440.9	97.6157	-1.28815	0.48112	-2.67741	0.00741949	0.999937	ENSG00000237440	ZNF737
ENSG00000115137.12	99.4346	-1.88111	0.573897	-3.27778	0.00104626	0.999937	ENSG00000115137	DNAJC27
ENSG00000169239.13	100.233	-1.12584	0.504288	-2.23253	0.02558	0.999937	ENSG00000169239	CA5B
ENSG00000141542.11	101.353	-1.1381	0.493616	-2.30563	0.0211312	0.999937	ENSG00000141542	RAB40B
ENSG00000241316.8	103.443	-1.09894	0.483803	-2.27146	0.0231193	0.999937	ENSG00000241316	SUCLG2-AS1
ENSG00000227220.1	106.355	-1.18013	0.538189	-2.19278	0.0283235	0.999937	ENSG00000227220	AL133346.1
ENSG00000163293.12	106.708	-1.25234	0.513934	-2.43677	0.0148193	0.999937	ENSG00000163293	NIPAL1
ENSG00000124205.18	112.804	-1.21376	0.52087	-2.33026	0.0197923	0.999937	ENSG00000124205	EDN3
ENSG00000115112.8	113.152	-1.10704	0.460984	-2.40147	0.0163292	0.999937	ENSG00000115112	TFCP2L1
ENSG00000279457.4	117.978	-1.28843	0.519101	-2.48204	0.0130634	0.999937	ENSG00000279457	WASH9P
ENSG00000161277.11	118.211	-1.01426	0.50559	-2.00609	0.0448471	0.999937	ENSG00000161277	THAP8
ENSG00000182986.14	121.644	-0.947608	0.449951	-2.10602	0.0352024	0.999937	ENSG00000182986	ZNF320
ENSG00000165115.15	122.051	-1.20011	0.461657	-2.59956	0.00933427	0.999937	ENSG00000165115	KIF27
ENSG00000175106.16	123.342	-0.955518	0.474482	-2.01381	0.0440292	0.999937	ENSG00000175106	TVP23C
ENSG00000168255.20	124.988	-1.11914	0.54253	-2.06281	0.0391304	0.999937	ENSG00000168255	POLR2J3
ENSG00000102796.11	126.3	-1.33342	0.565288	-2.35884	0.0183324	0.999937	ENSG00000102796	DHRS12
ENSG00000159208.16	136.081	-1.1413	0.472127	-2.41737	0.0156333	0.999937	ENSG00000159208	CIART
ENSG00000184584.13	137.071	-0.971844	0.45677	-2.12764	0.0333666	0.999937	ENSG00000184584	STING1
ENSG00000243232.6	137.737	-1.24585	0.555072	-2.24449	0.0248011	0.999937	ENSG00000243232	PCDHAC2
ENSG00000126814.7	142.544	-1.11226	0.439536	-2.53052	0.0113893	0.999937	ENSG00000126814	TRMT5
ENSG00000162374.18	142.902	-1.06062	0.468863	-2.26212	0.02369	0.999937	ENSG00000162374	ELAVL4
ENSG00000187266.14	145.419	-1.01342	0.465429	-2.1774	0.0294508	0.999937	ENSG00000187266	EPOR
ENSG00000040731.10	146.742	-0.991163	0.485653	-2.04089	0.0412621	0.999937	ENSG00000040731	CDH10
ENSG00000214013.9	146.937	-0.980625	0.431603	-2.27205	0.0230833	0.999937	ENSG00000214013	GANC
ENSG00000171522.6	148.947	-1.02172	0.464775	-2.19831	0.0279271	0.999937	ENSG00000171522	PTGER4
ENSG00000113966.10	150.374	-1.07935	0.434567	-2.48373	0.0130016	0.999937	ENSG00000113966	ARL6
ENSG00000186106.11	153.054	-1.13027	0.482139	-2.34427	0.0190642	0.999937	ENSG00000186106	ANKRD46
ENSG00000065609.14	156.086	-1.15758	0.443564	-2.60973	0.00906142	0.999937	ENSG00000065609	SNAP91
ENSG00000137720.8	156.725	-0.875017	0.433326	-2.01931	0.0434554	0.999937	ENSG00000137720	C11orf1
ENSG00000125703.15	160.096	-0.843751	0.425786	-1.98163	0.0475207	0.999937	ENSG00000125703	ATG4C
ENSG00000196227.11	165.365	-1.71897	0.434009	-3.96066	7.47e-05	0.338556	ENSG00000196227	FAM217B
ENSG00000108599.15	169.179	-0.950462	0.418064	-2.27349	0.0229969	0.999937	ENSG00000108599	AKAP10
ENSG00000123600.20	170.086	-1.06351	0.469182	-2.26673	0.0234064	0.999937	ENSG00000123600	METTL8
ENSG00000185875.13	170.402	-1.01895	0.465657	-2.18821	0.0286544	0.999937	ENSG00000185875	THNSL1
ENSG00000164074.15	174.555	-1.3189	0.456822	-2.88712	0.0038879	0.999937	ENSG00000164074	ABHD18
ENSG00000169629.12	177.011	-1.22521	0.588617	-2.08151	0.0373875	0.999937	ENSG00000169629	RGPD8
ENSG00000039139.9	180.346	-1.29976	0.547356	-2.37461	0.0175673	0.999937	ENSG00000039139	DNAH5
ENSG00000154917.11	181.293	-1.06739	0.485717	-2.19754	0.0279816	0.999937	ENSG00000154917	RAB6B
ENSG00000111358.14	181.595	-1.04228	0.412366	-2.52756	0.0114858	0.999937	ENSG00000111358	GTF2H3
ENSG00000138036.18	183.157	-0.848334	0.423617	-2.0026	0.0452204	0.999937	ENSG00000138036	DYNC2LI1
ENSG00000149260.18	184.575	-1.13208	0.443881	-2.55042	0.0107592	0.999937	ENSG00000149260	CAPN5
ENSG00000171100.15	184.669	-1.04903	0.491351	-2.13499	0.032762	0.999937	ENSG00000171100	MTM1
ENSG00000157107.14	185.1	-1.1012	0.410406	-2.68319	0.00729244	0.999937	ENSG00000157107	FCHO2
ENSG00000057704.13	187.618	-1.12047	0.441971	-2.53517	0.0112392	0.999937	ENSG00000057704	TMCC3
ENSG00000184702.20	190.057	-1.51853	0.477458	-3.18044	0.00147054	0.999937	ENSG00000184702	SEPTIN5
ENSG00000198001.14	194.646	-1.09662	0.46313	-2.36784	0.0178921	0.999937	ENSG00000198001	IRAK4
ENSG00000131910.5	194.962	-0.939778	0.437774	-2.14672	0.0318156	0.999937	ENSG00000131910	NR0B2
ENSG00000163960.12	195.854	-0.981931	0.445414	-2.20454	0.0274865	0.999937	ENSG00000163960	UBXN7
ENSG00000102547.19	196.197	-0.944181	0.464306	-2.03353	0.0419987	0.999937	ENSG00000102547	CAB39L
ENSG00000141179.14	196.275	-1.17109	0.473266	-2.47449	0.0133425	0.999937	ENSG00000141179	PCTP
ENSG00000188428.20	198.69	-1.04561	0.431777	-2.42163	0.0154509	0.999937	ENSG00000188428	BLOC1S5
ENSG00000067646.12	198.737	-0.814494	0.402169	-2.02525	0.0428415	0.999937	ENSG00000067646	ZFY
ENSG00000163071.11	199.702	-0.807898	0.398274	-2.0285	0.0425095	0.999937	ENSG00000163071	SPATA18
ENSG00000152056.17	201.928	-1.01399	0.491286	-2.06395	0.0390225	0.999937	ENSG00000152056	AP1S3
ENSG00000143363.17	205.864	-0.994396	0.43327	-2.29509	0.0217277	0.999937	ENSG00000143363	PRUNE1
ENSG00000124939.6	209.138	-1.21352	0.492726	-2.46286	0.0137833	0.999937	ENSG00000124939	SCGB2A1
ENSG00000118402.6	209.64	-0.998234	0.507957	-1.96519	0.0493918	0.999937	ENSG00000118402	ELOVL4
ENSG00000078237.7	210.171	-1.57334	0.640657	-2.45583	0.014056	0.999937	ENSG00000078237	TIGAR
ENSG00000154874.15	211.491	-0.953962	0.446309	-2.13745	0.0325615	0.999937	ENSG00000154874	CCDC144B
ENSG00000176148.16	218.065	-0.88939	0.416932	-2.13318	0.0329101	0.999937	ENSG00000176148	TCP11L1
ENSG00000256664.1	219.549	-1.22234	0.490345	-2.49282	0.0126734	0.999937	ENSG00000256664	AC025423.2
ENSG00000119965.13	226.025	-0.962879	0.488545	-1.97091	0.048734	0.999937	ENSG00000119965	C10orf88
ENSG00000155657.27	231.253	-1.43111	0.405511	-3.52915	0.000416902	0.702031	ENSG00000155657	TTN
ENSG00000119616.11	236.508	-0.90532	0.420675	-2.15207	0.0313922	0.999937	ENSG00000119616	FCF1
ENSG00000107201.10	241.62	-0.783575	0.396598	-1.97574	0.048184	0.999937	ENSG00000107201	DDX58
ENSG00000135709.12	242.152	-0.962571	0.432299	-2.22663	0.0259717	0.999937	ENSG00000135709	KIAA0513
ENSG00000119929.13	243.273	-0.829769	0.40198	-2.0642	0.0389986	0.999937	ENSG00000119929	CUTC
ENSG00000169255.15	243.996	-1.08941	0.499196	-2.18232	0.0290857	0.999937	ENSG00000169255	B3GALNT1
ENSG00000163281.12	246.066	-0.999908	0.456589	-2.18995	0.0285278	0.999937	ENSG00000163281	GNPDA2
ENSG00000152382.6	246.632	-0.887554	0.415114	-2.1381	0.032509	0.999937	ENSG00000152382	TADA1
ENSG00000104427.12	248.422	-0.890264	0.425777	-2.09092	0.0365356	0.999937	ENSG00000104427	ZC2HC1A
ENSG00000002587.10	254.799	-1.09179	0.479989	-2.27461	0.0229292	0.999937	ENSG00000002587	HS3ST1
ENSG00000139350.12	256.583	-0.86704	0.432579	-2.00435	0.0450323	0.999937	ENSG00000139350	NEDD1
ENSG00000079385.22	258.436	-0.954393	0.441058	-2.16387	0.0304743	0.999937	ENSG00000079385	CEACAM1
ENSG00000078124.12	261.592	-1.12935	0.404036	-2.79516	0.00518743	0.999937	ENSG00000078124	ACER3
ENSG00000198018.7	263.929	-0.800193	0.389945	-2.05207	0.0401632	0.999937	ENSG00000198018	ENTPD7
ENSG00000259976.3	265.261	-11.7504	3.84364	-3.05711	0.00223483	0.999937	ENSG00000259976	AC093010.2
ENSG00000146414.16	266.85	-0.833788	0.394923	-2.11127	0.0347493	0.999937	ENSG00000146414	SHPRH
ENSG00000135828.11	269.927	-0.813323	0.408963	-1.98874	0.0467295	0.999937	ENSG00000135828	RNASEL
ENSG00000145868.17	270.933	-0.76424	0.375976	-2.03268	0.0420846	0.999937	ENSG00000145868	FBXO38
ENSG00000113916.18	275.564	-1.29093	0.533815	-2.41831	0.0155928	0.999937	ENSG00000113916	BCL6
ENSG00000260912.1	276.232	-1.51227	0.452748	-3.3402	0.000837186	0.929939	ENSG00000260912	AL158206.1
ENSG00000011105.14	276.581	-0.913335	0.423276	-2.15777	0.0309454	0.999937	ENSG00000011105	TSPAN9
ENSG00000132768.14	280.416	-0.816975	0.39557	-2.06531	0.0388935	0.999937	ENSG00000132768	DPH2
ENSG00000137075.18	280.547	-0.816879	0.396752	-2.05892	0.0395021	0.999937	ENSG00000137075	RNF38
ENSG00000122484.9	281.598	-1.45312	0.532865	-2.72699	0.00639152	0.999937	ENSG00000122484	RPAP2
ENSG00000204524.7	281.819	-0.792083	0.374277	-2.11631	0.0343189	0.999937	ENSG00000204524	ZNF805
ENSG00000179178.11	282.044	-0.769144	0.389855	-1.9729	0.0485073	0.999937	ENSG00000179178	TMEM125
ENSG00000170088.14	286.844	-0.993528	0.432534	-2.29699	0.0216191	0.999937	ENSG00000170088	TMEM192
ENSG00000189050.16	287.627	-0.769708	0.383018	-2.00959	0.0444749	0.999937	ENSG00000189050	RNFT1
ENSG00000082213.18	296.443	-0.927308	0.430355	-2.15475	0.0311814	0.999937	ENSG00000082213	C5orf22
ENSG00000197563.11	297.156	-0.825764	0.389329	-2.12099	0.0339225	0.999937	ENSG00000197563	PIGN
ENSG00000174943.11	297.754	-0.843358	0.408467	-2.06469	0.0389523	0.999937	ENSG00000174943	KCTD13
ENSG00000040341.18	299.384	-0.865385	0.375943	-2.30191	0.0213404	0.999937	ENSG00000040341	STAU2
ENSG00000157823.17	303.948	-0.898985	0.439063	-2.04751	0.040608	0.999937	ENSG00000157823	AP3S2
ENSG00000132952.12	304.488	-0.973616	0.37222	-2.6157	0.00890442	0.999937	ENSG00000132952	USPL1
ENSG00000169122.11	308.073	-0.870401	0.393958	-2.20937	0.0271487	0.999937	ENSG00000169122	FAM110B
ENSG00000187193.9	309.564	-1.18326	0.502229	-2.35601	0.0184723	0.999937	ENSG00000187193	MT1X
ENSG00000114904.13	316.44	-0.849192	0.380005	-2.23469	0.025438	0.999937	ENSG00000114904	NEK4
ENSG00000111110.12	316.682	-1.31373	0.403032	-3.25961	0.00111567	0.999937	ENSG00000111110	PPM1H
ENSG00000197892.13	318.357	-0.873425	0.437566	-1.9961	0.0459229	0.999937	ENSG00000197892	KIF13B
ENSG00000205133.12	320.63	-0.965429	0.413641	-2.33398	0.019597	0.999937	ENSG00000205133	TRIQK
ENSG00000140463.14	322.303	-0.979153	0.382987	-2.55662	0.0105693	0.999937	ENSG00000140463	BBS4
ENSG00000254858.10	322.804	-0.824644	0.386312	-2.13466	0.0327889	0.999937	ENSG00000254858	MPV17L2
ENSG00000164073.11	322.912	-0.864075	0.407128	-2.12237	0.0338068	0.999937	ENSG00000164073	MFSD8
ENSG00000170381.14	323.413	-1.41132	0.417923	-3.37698	0.000732871	0.883206	ENSG00000170381	SEMA3E
ENSG00000177917.11	323.683	-0.863155	0.389206	-2.21773	0.026573	0.999937	ENSG00000177917	ARL6IP6
ENSG00000101871.16	323.969	-1.055	0.388838	-2.71321	0.00666348	0.999937	ENSG00000101871	MID1
ENSG00000164331.10	324.018	-0.85663	0.427408	-2.00424	0.0450439	0.999937	ENSG00000164331	ANKRA2
ENSG00000134758.14	325.495	-1.06312	0.389101	-2.73224	0.00629048	0.999937	ENSG00000134758	RNF138
ENSG00000147894.17	326.71	-0.931318	0.395094	-2.3572	0.0184131	0.999937	ENSG00000147894	C9orf72
ENSG00000107669.17	328.682	-0.853909	0.372073	-2.295	0.0217329	0.999937	ENSG00000107669	ATE1
ENSG00000088451.11	329.487	-0.912474	0.406546	-2.24445	0.0248033	0.999937	ENSG00000088451	TGDS
ENSG00000108306.13	329.67	-0.832246	0.402713	-2.0666	0.0387718	0.999937	ENSG00000108306	FBXL20
ENSG00000108963.18	333.267	-0.798113	0.379006	-2.1058	0.0352213	0.999937	ENSG00000108963	DPH1
ENSG00000151806.14	333.412	-0.916237	0.394361	-2.32334	0.0201607	0.999937	ENSG00000151806	GUF1
ENSG00000103111.15	334.923	-0.805288	0.407764	-1.97489	0.048281	0.999937	ENSG00000103111	MON1B
ENSG00000178425.14	337.383	-1.08685	0.46189	-2.35306	0.0186197	0.999937	ENSG00000178425	NT5DC1
ENSG00000197329.12	338.191	-0.934139	0.402293	-2.32203	0.0202311	0.999937	ENSG00000197329	PELI1
ENSG00000116141.16	338.59	-0.88958	0.421866	-2.10868	0.0349724	0.999937	ENSG00000116141	MARK1
ENSG00000162976.13	340.205	-0.844416	0.410959	-2.05474	0.0399039	0.999937	ENSG00000162976	SLC66A3
ENSG00000119328.12	342.224	-0.888538	0.388367	-2.28788	0.0221443	0.999937	ENSG00000119328	ABITRAM
ENSG00000213066.13	344.417	-0.72334	0.364486	-1.98455	0.0471945	0.999937	ENSG00000213066	CEP43
ENSG00000203880.12	345.667	-0.844917	0.416283	-2.02967	0.04239	0.999937	ENSG00000203880	PCMTD2
ENSG00000147421.18	348.643	-0.841968	0.385053	-2.18663	0.0287697	0.999937	ENSG00000147421	HMBOX1
ENSG00000158092.7	349.384	-0.789243	0.385029	-2.04983	0.0403814	0.999937	ENSG00000158092	NCK1
ENSG00000035664.11	351.939	-0.919971	0.382116	-2.40757	0.016059	0.999937	ENSG00000035664	DAPK2
ENSG00000156103.16	353.131	-0.858032	0.364537	-2.35376	0.0185846	0.999937	ENSG00000156103	MMP16
ENSG00000005801.18	354.879	-1.18039	0.399726	-2.95299	0.00314712	0.999937	ENSG00000005801	ZNF195
ENSG00000257181.1	356.621	-0.989977	0.418566	-2.36516	0.018022	0.999937	ENSG00000257181	AC025423.4
ENSG00000101928.13	362.584	-0.870516	0.432462	-2.01293	0.0441216	0.999937	ENSG00000101928	MOSPD1
ENSG00000163558.13	364.064	-0.799641	0.372982	-2.14391	0.0320401	0.999937	ENSG00000163558	PRKCI
ENSG00000136710.10	365.234	-0.900702	0.382684	-2.35365	0.0185903	0.999937	ENSG00000136710	CCDC115
ENSG00000173226.17	367.51	-0.929557	0.385977	-2.40832	0.0160261	0.999937	ENSG00000173226	IQCB1
ENSG00000113638.14	371.947	-0.946266	0.393409	-2.4053	0.0161594	0.999937	ENSG00000113638	TTC33
ENSG00000153132.13	372.851	-0.910744	0.436367	-2.08711	0.0368786	0.999937	ENSG00000153132	CLGN
ENSG00000182923.18	377.315	-0.791596	0.389231	-2.03374	0.0419776	0.999937	ENSG00000182923	CEP63
ENSG00000135953.11	377.94	-1.11377	0.389424	-2.86005	0.00423573	0.999937	ENSG00000135953	MFSD9
ENSG00000179387.10	378.778	-0.793258	0.399838	-1.98395	0.0472619	0.999937	ENSG00000179387	ELMOD2
ENSG00000155903.13	381.375	-1.0828	0.399305	-2.7117	0.00669389	0.999937	ENSG00000155903	RASA2
ENSG00000256043.3	385.069	-1.22001	0.515547	-2.36643	0.0179605	0.999937	ENSG00000256043	CTSO
ENSG00000136490.9	385.365	-0.921075	0.436118	-2.11198	0.0346877	0.999937	ENSG00000136490	LIMD2
ENSG00000180776.16	385.797	-0.861547	0.406101	-2.12151	0.0338787	0.999937	ENSG00000180776	ZDHHC20
ENSG00000165322.18	386.282	-0.947498	0.38231	-2.47835	0.0131992	0.999937	ENSG00000165322	ARHGAP12
ENSG00000143457.11	386.512	-0.845062	0.385837	-2.1902	0.0285095	0.999937	ENSG00000143457	GOLPH3L
ENSG00000120925.16	389.162	-0.912587	0.39132	-2.33207	0.019697	0.999937	ENSG00000120925	RNF170
ENSG00000117479.15	391.756	-0.862619	0.363284	-2.3745	0.0175727	0.999937	ENSG00000117479	SLC19A2
ENSG00000066855.16	393.354	-0.798164	0.375457	-2.12585	0.0335161	0.999937	ENSG00000066855	MTFR1
ENSG00000076067.13	397.378	-0.817612	0.368542	-2.21851	0.0265203	0.999937	ENSG00000076067	RBMS2
ENSG00000156171.14	398.228	-1.14453	0.441518	-2.59226	0.00953488	0.999937	ENSG00000156171	DRAM2
ENSG00000152942.19	398.291	-1.08979	0.391595	-2.78295	0.00538674	0.999937	ENSG00000152942	RAD17
ENSG00000214049.8	402.147	-1.21023	0.523862	-2.31021	0.0208764	0.999937	ENSG00000214049	UCA1
ENSG00000114742.14	403.054	-0.873285	0.373097	-2.34064	0.0192507	0.999937	ENSG00000114742	WDR48
ENSG00000183597.16	407.831	-0.841864	0.376171	-2.23798	0.0252223	0.999937	ENSG00000183597	TANGO2
ENSG00000107798.18	408.506	-0.866895	0.42691	-2.03063	0.0422928	0.999937	ENSG00000107798	LIPA
ENSG00000169242.12	411.293	-0.701755	0.356669	-1.96752	0.0491229	0.999937	ENSG00000169242	EFNA1
ENSG00000128965.13	414.803	-0.925585	0.38721	-2.3904	0.0168302	0.999937	ENSG00000128965	CHAC1
ENSG00000140386.13	417.019	-0.756003	0.374909	-2.0165	0.0437481	0.999937	ENSG00000140386	SCAPER
ENSG00000151881.14	417.033	-0.775333	0.385842	-2.00946	0.0444887	0.999937	ENSG00000151881	TMEM267
ENSG00000161533.12	422.278	-0.722018	0.366309	-1.97106	0.0487167	0.999937	ENSG00000161533	ACOX1
ENSG00000061918.14	424.797	-0.919343	0.401306	-2.29088	0.0219704	0.999937	ENSG00000061918	GUCY1B1
ENSG00000175354.20	425.868	-0.792596	0.377575	-2.09917	0.0358018	0.999937	ENSG00000175354	PTPN2
ENSG00000135678.12	426.674	-0.83756	0.349209	-2.39845	0.0164647	0.999937	ENSG00000135678	CPM
ENSG00000259583.3	427.494	-1.0195	0.425745	-2.39463	0.0166371	0.999937	ENSG00000259583	AC015712.2
ENSG00000107295.10	427.707	-1.19316	0.493698	-2.41677	0.0156587	0.999937	ENSG00000107295	SH3GL2
ENSG00000000003.15	431.596	-0.794154	0.391266	-2.0297	0.0423866	0.999937	ENSG00000000003	TSPAN6
ENSG00000107537.14	433.897	-0.8207	0.384759	-2.13302	0.0329228	0.999937	ENSG00000107537	PHYH
ENSG00000164168.8	438.898	-0.885979	0.394603	-2.24524	0.0247525	0.999937	ENSG00000164168	TMEM184C
ENSG00000144468.17	444.986	-1.04605	0.38387	-2.72501	0.00643005	0.999937	ENSG00000144468	RHBDD1
ENSG00000087338.5	447.534	-0.899867	0.366371	-2.45616	0.0140429	0.999937	ENSG00000087338	GMCL1
ENSG00000125398.8	448.012	-0.828438	0.375211	-2.20793	0.0272492	0.999937	ENSG00000125398	SOX9
ENSG00000157349.17	456.701	-0.751322	0.372463	-2.01717	0.0436777	0.999937	ENSG00000157349	DDX19B
ENSG00000059758.8	458.356	-0.878923	0.368107	-2.38768	0.0169549	0.999937	ENSG00000059758	CDK17
ENSG00000069667.16	459.026	-1.06311	0.38006	-2.79722	0.00515442	0.999937	ENSG00000069667	RORA
ENSG00000026103.22	459.3	-0.846835	0.393865	-2.15006	0.0315501	0.999937	ENSG00000026103	FAS
ENSG00000133103.17	459.574	-0.840472	0.406324	-2.06847	0.0385954	0.999937	ENSG00000133103	COG6
ENSG00000100532.12	460.118	-0.752184	0.374692	-2.00747	0.0446993	0.999937	ENSG00000100532	CGRRF1
ENSG00000065615.14	461.374	-0.934176	0.449562	-2.07797	0.0377122	0.999937	ENSG00000065615	CYB5R4
ENSG00000080546.13	463.175	-0.824067	0.381256	-2.16145	0.0306606	0.999937	ENSG00000080546	SESN1
ENSG00000071073.13	464.56	-1.14919	0.418888	-2.74344	0.00607996	0.999937	ENSG00000071073	MGAT4A
ENSG00000101493.11	468.066	-1.03613	0.358962	-2.88647	0.00389593	0.999937	ENSG00000101493	ZNF516
ENSG00000109586.12	470.836	-0.782529	0.382797	-2.04424	0.0409295	0.999937	ENSG00000109586	GALNT7
ENSG00000177888.8	473.131	-0.952902	0.356333	-2.67419	0.00749104	0.999937	ENSG00000177888	ZBTB41
ENSG00000008405.12	474.683	-0.888476	0.41979	-2.11648	0.0343042	0.999937	ENSG00000008405	CRY1
ENSG00000155849.15	476.673	-1.21763	0.574387	-2.11988	0.034016	0.999937	ENSG00000155849	ELMO1
ENSG00000071189.21	477.378	-0.965764	0.437041	-2.20978	0.0271205	0.999937	ENSG00000071189	SNX13
ENSG00000105879.12	479.622	-0.94207	0.364381	-2.5854	0.00972666	0.999937	ENSG00000105879	CBLL1
ENSG00000166407.14	482.13	-0.926344	0.454025	-2.04029	0.0413212	0.999937	ENSG00000166407	LMO1
ENSG00000204977.10	482.972	-0.74215	0.362604	-2.04672	0.0406851	0.999937	ENSG00000204977	TRIM13
ENSG00000148516.21	485.926	-0.881866	0.413876	-2.13075	0.0331098	0.999937	ENSG00000148516	ZEB1
ENSG00000096060.15	488.785	-0.712848	0.360083	-1.97968	0.0477399	0.999937	ENSG00000096060	FKBP5
ENSG00000163131.11	496.11	-0.779008	0.385092	-2.02291	0.0430822	0.999937	ENSG00000163131	CTSS
ENSG00000196730.13	500.993	-0.959137	0.423405	-2.2653	0.0234944	0.999937	ENSG00000196730	DAPK1
ENSG00000146476.11	502.494	-0.864215	0.427902	-2.01966	0.0434191	0.999937	ENSG00000146476	ARMT1
ENSG00000110422.12	504.118	-0.742244	0.371106	-2.00009	0.0454909	0.999937	ENSG00000110422	HIPK3
ENSG00000125772.14	505.927	-1.05086	0.373789	-2.81138	0.00493294	0.999937	ENSG00000125772	GPCPD1
ENSG00000170006.12	506.01	-1.17481	0.375597	-3.12785	0.00176092	0.999937	ENSG00000170006	TMEM154
ENSG00000173889.16	508.033	-0.930023	0.378533	-2.45692	0.0140135	0.999937	ENSG00000173889	PHC3
ENSG00000167005.14	510.533	-0.948536	0.441997	-2.14602	0.031871	0.999937	ENSG00000167005	NUDT21
ENSG00000128923.11	512.882	-1.09335	0.338571	-3.22932	0.00124084	0.999937	ENSG00000128923	MINDY2
ENSG00000119402.17	516.732	-0.784231	0.360232	-2.17701	0.0294796	0.999937	ENSG00000119402	FBXW2
ENSG00000196505.11	519.181	-0.935141	0.403904	-2.31526	0.0205989	0.999937	ENSG00000196505	GDAP2
ENSG00000143437.21	523.301	-0.841182	0.427846	-1.96609	0.0492886	0.999937	ENSG00000143437	ARNT
ENSG00000174197.16	532.438	-0.774066	0.354617	-2.18282	0.0290489	0.999937	ENSG00000174197	MGA
ENSG00000119004.16	532.841	-1.01685	0.385692	-2.63643	0.00837832	0.999937	ENSG00000119004	CYP20A1
ENSG00000165102.15	533.345	-0.760397	0.34942	-2.17617	0.0295426	0.999937	ENSG00000165102	HGSNAT
ENSG00000179454.14	536.937	-1.02442	0.361827	-2.83125	0.00463664	0.999937	ENSG00000179454	KLHL28
ENSG00000035115.22	537.423	-0.850399	0.398921	-2.13175	0.0330274	0.999937	ENSG00000035115	SH3YL1
ENSG00000054654.19	537.425	-0.855267	0.34857	-2.45364	0.0141417	0.999937	ENSG00000054654	SYNE2
ENSG00000085449.15	540.184	-0.78557	0.388849	-2.02025	0.0433579	0.999937	ENSG00000085449	WDFY1
ENSG00000141446.11	541.2	-0.865308	0.378239	-2.28773	0.0221534	0.999937	ENSG00000141446	ESCO1
ENSG00000197601.13	547.42	-0.745992	0.37116	-2.00989	0.0444427	0.999937	ENSG00000197601	FAR1
ENSG00000131437.15	548.537	-0.893765	0.435715	-2.05126	0.0402414	0.999937	ENSG00000131437	KIF3A
ENSG00000176142.13	550.462	-1.29114	0.386866	-3.33743	0.000845562	0.929939	ENSG00000176142	TMEM39A
ENSG00000170145.5	550.796	-0.765703	0.375517	-2.03907	0.0414434	0.999937	ENSG00000170145	SIK2
ENSG00000136021.19	551.53	-0.739874	0.339304	-2.18056	0.0292157	0.999937	ENSG00000136021	SCYL2
ENSG00000168297.16	555.326	-0.764266	0.365741	-2.08964	0.0366504	0.999937	ENSG00000168297	PXK
ENSG00000062725.10	559.826	-1.13157	0.467846	-2.41869	0.0155766	0.999937	ENSG00000062725	APPBP2
ENSG00000169155.10	560.05	-1.05904	0.376738	-2.81107	0.00493776	0.999937	ENSG00000169155	ZBTB43
ENSG00000104368.18	561.909	-0.853117	0.35796	-2.38327	0.0171595	0.999937	ENSG00000104368	PLAT
ENSG00000028839.10	561.922	-0.684625	0.345413	-1.98204	0.0474744	0.999937	ENSG00000028839	TBPL1
ENSG00000115947.14	562.64	-0.983864	0.430804	-2.28378	0.0223843	0.999937	ENSG00000115947	ORC4
ENSG00000258757.1	563.372	-1.50309	0.554872	-2.70889	0.0067508	0.999937	ENSG00000258757	AL133453.1
ENSG00000134852.15	566.545	-0.685634	0.347831	-1.97117	0.0487044	0.999937	ENSG00000134852	CLOCK
ENSG00000095777.17	569.911	-1.21074	0.506754	-2.38921	0.0168846	0.999937	ENSG00000095777	MYO3A
ENSG00000156136.10	570.264	-1.03883	0.418884	-2.47999	0.0131385	0.999937	ENSG00000156136	DCK
ENSG00000104231.11	571.551	-0.683811	0.339276	-2.0155	0.0438522	0.999937	ENSG00000104231	ZFAND1
ENSG00000134152.11	571.864	-0.84561	0.396881	-2.13064	0.0331189	0.999937	ENSG00000134152	KATNBL1
ENSG00000134339.9	575.265	-1.07015	0.396185	-2.70113	0.00691034	0.999937	ENSG00000134339	SAA2
ENSG00000118263.15	576.599	-0.674019	0.336578	-2.00256	0.0452241	0.999937	ENSG00000118263	KLF7
ENSG00000086300.16	582.051	-0.674576	0.333841	-2.02065	0.0433158	0.999937	ENSG00000086300	SNX10
ENSG00000053770.12	587.792	-0.797241	0.39336	-2.02675	0.0426885	0.999937	ENSG00000053770	AP5M1
ENSG00000165959.12	590.464	-0.761765	0.359082	-2.12142	0.0338864	0.999937	ENSG00000165959	CLMN
ENSG00000163681.16	599.384	-0.732637	0.369177	-1.98452	0.0471983	0.999937	ENSG00000163681	SLMAP
ENSG00000140274.14	600.351	-1.73285	0.544572	-3.18205	0.00146236	0.999937	ENSG00000140274	DUOXA2
ENSG00000100596.7	601.792	-0.741729	0.360681	-2.05647	0.0397372	0.999937	ENSG00000100596	SPTLC2
ENSG00000143815.15	602.605	-0.889727	0.391194	-2.27439	0.0229427	0.999937	ENSG00000143815	LBR
ENSG00000219481.10	606.462	-0.868686	0.339771	-2.55668	0.0105676	0.999937	ENSG00000219481	NBPF1
ENSG00000171564.12	611.382	-1.0219	0.410588	-2.48886	0.0128152	0.999937	ENSG00000171564	FGB
ENSG00000105778.19	611.52	-0.843081	0.410535	-2.05362	0.0400127	0.999937	ENSG00000105778	AVL9
ENSG00000165434.8	615.333	-0.873847	0.353606	-2.47124	0.0134645	0.999937	ENSG00000165434	PGM2L1
ENSG00000117859.19	616.987	-0.783258	0.375021	-2.08857	0.0367461	0.999937	ENSG00000117859	OSBPL9
ENSG00000118518.16	619.522	-0.71316	0.356405	-2.00098	0.0453942	0.999937	ENSG00000118518	RNF146
ENSG00000163512.14	619.908	-0.760565	0.345303	-2.2026	0.0276229	0.999937	ENSG00000163512	AZI2
ENSG00000006715.16	620.568	-1.04432	0.386218	-2.70395	0.00685196	0.999937	ENSG00000006715	VPS41
ENSG00000120937.9	620.906	-0.736839	0.336338	-2.19077	0.0284687	0.999937	ENSG00000120937	NPPB
ENSG00000134709.12	621.809	-1.19069	0.361761	-3.29138	0.000996988	0.999937	ENSG00000134709	HOOK1
ENSG00000198887.9	624.682	-0.72364	0.346926	-2.08586	0.036991	0.999937	ENSG00000198887	SMC5
ENSG00000164031.17	624.683	-1.08301	0.423243	-2.55883	0.0105024	0.999937	ENSG00000164031	DNAJB14
ENSG00000152749.8	629.61	-0.882808	0.375625	-2.35024	0.0187614	0.999937	ENSG00000152749	GPR180
ENSG00000132639.13	632.46	-1.02116	0.476909	-2.1412	0.0322583	0.999937	ENSG00000132639	SNAP25
ENSG00000154153.13	635.666	-1.4	0.388933	-3.5996	0.000318707	0.663417	ENSG00000154153	RETREG1
ENSG00000100744.15	636.032	-0.900243	0.42067	-2.14002	0.032353	0.999937	ENSG00000100744	GSKIP
ENSG00000156711.17	638.239	-0.729368	0.366594	-1.98958	0.0466376	0.999937	ENSG00000156711	MAPK13
ENSG00000117155.16	641.435	-0.811097	0.391374	-2.07244	0.0382249	0.999937	ENSG00000117155	SSX2IP
ENSG00000166128.13	644.85	-0.879061	0.405087	-2.17006	0.0300025	0.999937	ENSG00000166128	RAB8B
ENSG00000136052.9	645.493	-1.05972	0.353626	-2.99673	0.00272895	0.999937	ENSG00000136052	SLC41A2
ENSG00000143469.20	646.057	-1.54977	0.403224	-3.84345	0.000121317	0.396838	ENSG00000143469	SYT14
ENSG00000164219.10	646.536	-1.05052	0.409496	-2.56541	0.0103055	0.999937	ENSG00000164219	PGGT1B
ENSG00000169902.15	647.419	-0.809288	0.377368	-2.14456	0.0319881	0.999937	ENSG00000169902	TPST1
ENSG00000105855.10	649.591	-0.887577	0.416334	-2.13189	0.0330162	0.999937	ENSG00000105855	ITGB8
ENSG00000101966.13	651.399	-1.42517	0.474004	-3.00666	0.00264137	0.999937	ENSG00000101966	XIAP
ENSG00000147457.14	656.43	-0.692889	0.339953	-2.03819	0.0415308	0.999937	ENSG00000147457	CHMP7
ENSG00000082258.13	657.436	-0.723706	0.342929	-2.11037	0.0348269	0.999937	ENSG00000082258	CCNT2
ENSG00000082996.20	658.409	-0.984343	0.433353	-2.27146	0.0231192	0.999937	ENSG00000082996	RNF13
ENSG00000104320.14	660.088	-0.815432	0.397389	-2.05198	0.040172	0.999937	ENSG00000104320	NBN
ENSG00000104343.21	666.914	-0.776252	0.348728	-2.22595	0.0260174	0.999937	ENSG00000104343	UBE2W
ENSG00000234456.8	677.373	-0.839097	0.377817	-2.22091	0.0263572	0.999937	ENSG00000234456	MAGI2-AS3
ENSG00000142892.15	683.571	-0.851338	0.39797	-2.1392	0.0324193	0.999937	ENSG00000142892	PIGK
ENSG00000163171.8	688.722	-0.820067	0.356738	-2.2988	0.0215165	0.999937	ENSG00000163171	CDC42EP3
ENSG00000140262.18	690.61	-1.30957	0.39267	-3.33504	0.000852876	0.929939	ENSG00000140262	TCF12
ENSG00000170525.21	692.826	-0.669684	0.334921	-1.99953	0.0455511	0.999937	ENSG00000170525	PFKFB3
ENSG00000107551.21	697.743	-1.25179	0.354756	-3.52859	0.000417777	0.702031	ENSG00000107551	RASSF4
ENSG00000123836.15	699.619	-1.18748	0.404894	-2.93281	0.00335912	0.999937	ENSG00000123836	PFKFB2
ENSG00000135549.15	701.65	-0.876402	0.38127	-2.29864	0.0215255	0.999937	ENSG00000135549	PKIB
ENSG00000107643.16	702.122	-0.918351	0.369199	-2.48741	0.0128675	0.999937	ENSG00000107643	MAPK8
ENSG00000114120.14	704.818	-1.06298	0.331835	-3.20333	0.00135849	0.999937	ENSG00000114120	SLC25A36
ENSG00000146282.18	705.25	-0.730205	0.351695	-2.07625	0.0378713	0.999937	ENSG00000146282	RARS2
ENSG00000172269.19	713.116	-0.869674	0.376004	-2.31294	0.020726	0.999937	ENSG00000172269	DPAGT1
ENSG00000167244.21	717.228	-1.1449	0.494084	-2.31721	0.0204923	0.999937	ENSG00000167244	IGF2
ENSG00000173432.12	718.657	-1.00729	0.377667	-2.66715	0.00764972	0.999937	ENSG00000173432	SAA1
ENSG00000119314.16	729.232	-1.2831	0.413192	-3.10533	0.00190066	0.999937	ENSG00000119314	PTBP3
ENSG00000164134.13	733.399	-0.680668	0.343725	-1.98027	0.0476732	0.999937	ENSG00000164134	NAA15
ENSG00000099968.18	735.714	-0.896266	0.394546	-2.27164	0.0231083	0.999937	ENSG00000099968	BCL2L13
ENSG00000114796.16	747.43	-1.06585	0.387256	-2.75233	0.00591735	0.999937	ENSG00000114796	KLHL24
ENSG00000148926.10	747.993	-0.99892	0.483762	-2.0649	0.0389326	0.999937	ENSG00000148926	ADM
ENSG00000134107.5	751.728	-0.82086	0.388878	-2.11084	0.034786	0.999937	ENSG00000134107	BHLHE40
ENSG00000164209.17	753.42	-0.839854	0.422301	-1.98876	0.0467282	0.999937	ENSG00000164209	SLC25A46
ENSG00000140443.15	753.52	-1.06715	0.335601	-3.17983	0.00147362	0.999937	ENSG00000140443	IGF1R
ENSG00000172466.16	761.558	-0.8345	0.372548	-2.23998	0.0250923	0.999937	ENSG00000172466	ZNF24
ENSG00000155508.13	761.763	-0.749429	0.336922	-2.22434	0.0261254	0.999937	ENSG00000155508	CNOT8
ENSG00000166847.10	765.659	-0.648549	0.330321	-1.96339	0.0496011	0.999937	ENSG00000166847	DCTN5
ENSG00000156298.13	773.798	-1.11439	0.496862	-2.24286	0.0249057	0.999937	ENSG00000156298	TSPAN7
ENSG00000152377.14	785.715	-1.0166	0.396709	-2.56259	0.0103894	0.999937	ENSG00000152377	SPOCK1
ENSG00000177426.22	788.901	-1.029	0.364078	-2.82632	0.00470866	0.999937	ENSG00000177426	TGIF1
ENSG00000182985.17	789.134	-1.21785	0.402496	-3.02575	0.00248021	0.999937	ENSG00000182985	CADM1
ENSG00000109184.15	789.619	-0.855329	0.338411	-2.52748	0.0114884	0.999937	ENSG00000109184	DCUN1D4
ENSG00000184203.8	789.703	-0.807517	0.384254	-2.10152	0.0355953	0.999937	ENSG00000184203	PPP1R2
ENSG00000113658.18	794.306	-0.724674	0.343238	-2.11129	0.0347476	0.999937	ENSG00000113658	SMAD5
ENSG00000106460.19	805.896	-0.965693	0.357548	-2.70088	0.00691567	0.999937	ENSG00000106460	TMEM106B
ENSG00000114857.18	812.179	-0.798197	0.370236	-2.15591	0.0310905	0.999937	ENSG00000114857	NKTR
ENSG00000080815.19	813.199	-0.969475	0.362553	-2.67403	0.00749463	0.999937	ENSG00000080815	PSEN1
ENSG00000076053.11	815.702	-0.923879	0.398196	-2.32016	0.0203322	0.999937	ENSG00000076053	RBM7
ENSG00000114520.11	820.448	-0.747663	0.345593	-2.16342	0.030509	0.999937	ENSG00000114520	SNX4
ENSG00000136960.13	822.025	-1.04673	0.433745	-2.41324	0.0158114	0.999937	ENSG00000136960	ENPP2
ENSG00000116539.13	822.525	-0.748683	0.344958	-2.17036	0.0299795	0.999937	ENSG00000116539	ASH1L
ENSG00000186577.14	835.574	-0.832411	0.409586	-2.03232	0.0421211	0.999937	ENSG00000186577	SMIM29
ENSG00000014824.14	842.267	-1.04894	0.386715	-2.71245	0.00667887	0.999937	ENSG00000014824	SLC30A9
ENSG00000186469.8	843.353	-0.767632	0.376268	-2.04012	0.0413383	0.999937	ENSG00000186469	GNG2
ENSG00000185658.13	853.606	-0.795916	0.348212	-2.28572	0.0222704	0.999937	ENSG00000185658	BRWD1
ENSG00000136709.12	858.94	-1.07556	0.378537	-2.84136	0.00449212	0.999937	ENSG00000136709	WDR33
ENSG00000117394.24	879.215	-0.846035	0.38762	-2.18264	0.0290624	0.999937	ENSG00000117394	SLC2A1
ENSG00000175387.16	880.355	-0.719275	0.33281	-2.16122	0.0306785	0.999937	ENSG00000175387	SMAD2
ENSG00000152332.16	880.86	-0.840878	0.394643	-2.13073	0.0331113	0.999937	ENSG00000152332	UHMK1
ENSG00000213626.13	882.348	-0.797671	0.405639	-1.96645	0.0492461	0.999937	ENSG00000213626	LBH
ENSG00000075292.19	885.327	-0.663898	0.335597	-1.97826	0.0478995	0.999937	ENSG00000075292	ZNF638
ENSG00000176840.12	891.753	-1.15081	0.443906	-2.59246	0.00952933	0.999937	ENSG00000176840	MIR7-3HG
ENSG00000048392.12	894.554	-0.70805	0.342276	-2.06866	0.0385784	0.999937	ENSG00000048392	RRM2B
ENSG00000153561.13	906.982	-0.979107	0.328838	-2.97747	0.00290638	0.999937	ENSG00000153561	RMND5A
ENSG00000135778.12	910.231	-0.765351	0.341386	-2.24189	0.0249685	0.999937	ENSG00000135778	NTPCR
ENSG00000110429.14	912.396	-0.746503	0.379918	-1.9649	0.0494254	0.999937	ENSG00000110429	FBXO3
ENSG00000138207.14	924.094	-1.50354	0.509617	-2.95033	0.00317439	0.999937	ENSG00000138207	RBP4
ENSG00000137831.15	924.752	-0.756332	0.385068	-1.96415	0.0495127	0.999937	ENSG00000137831	UACA
ENSG00000134109.11	935.268	-0.81012	0.347056	-2.33426	0.019582	0.999937	ENSG00000134109	EDEM1
ENSG00000120756.13	954.645	-1.09524	0.419233	-2.61249	0.00898845	0.999937	ENSG00000120756	PLS1
ENSG00000189067.13	961.996	-0.717075	0.353644	-2.02768	0.0425933	0.999937	ENSG00000189067	LITAF
ENSG00000135069.14	965.754	-0.888054	0.402926	-2.20401	0.0275235	0.999937	ENSG00000135069	PSAT1
ENSG00000144369.13	966.041	-1.10768	0.518775	-2.13519	0.0327456	0.999937	ENSG00000144369	FAM171B
ENSG00000198399.14	969.223	-0.684854	0.325587	-2.10344	0.035427	0.999937	ENSG00000198399	ITSN2
ENSG00000106638.17	970.804	-0.801021	0.34412	-2.32773	0.0199262	0.999937	ENSG00000106638	TBL2
ENSG00000169490.17	974.158	-0.754383	0.332309	-2.27012	0.0232002	0.999937	ENSG00000169490	TM2D2
ENSG00000006652.15	976.152	-0.738577	0.353879	-2.08709	0.03688	0.999937	ENSG00000006652	IFRD1
ENSG00000150593.18	977.767	-0.925131	0.404179	-2.28891	0.0220844	0.999937	ENSG00000150593	PDCD4
ENSG00000147533.17	983.176	-0.626279	0.318186	-1.96828	0.0490358	0.999937	ENSG00000147533	GOLGA7
ENSG00000101290.14	984.233	-0.975171	0.40881	-2.38539	0.0170612	0.999937	ENSG00000101290	CDS2
ENSG00000076685.19	993.15	-0.702531	0.326865	-2.1493	0.0316108	0.999937	ENSG00000076685	NT5C2
ENSG00000177311.11	999.775	-0.826701	0.373906	-2.21099	0.0270369	0.999937	ENSG00000177311	ZBTB38
ENSG00000143324.14	1000.44	-0.857177	0.411273	-2.08421	0.0371414	0.999937	ENSG00000143324	XPR1
ENSG00000136754.17	1001.42	-0.749112	0.374182	-2.002	0.0452848	0.999937	ENSG00000136754	ABI1
ENSG00000163875.16	1001.73	-0.903605	0.380735	-2.37332	0.0176291	0.999937	ENSG00000163875	MEAF6
ENSG00000007372.23	1004.44	-1.00066	0.412222	-2.42747	0.0152047	0.999937	ENSG00000007372	PAX6
ENSG00000139793.18	1009.67	-0.920064	0.34273	-2.68452	0.00726348	0.999937	ENSG00000139793	MBNL2
ENSG00000003147.19	1013.61	-1.0381	0.364227	-2.85014	0.00437	0.999937	ENSG00000003147	ICA1
ENSG00000137500.9	1031.88	-0.721849	0.352662	-2.04686	0.0406723	0.999937	ENSG00000137500	CCDC90B
ENSG00000196233.14	1040.8	-0.843079	0.323542	-2.60578	0.00916657	0.999937	ENSG00000196233	LCOR
ENSG00000011009.11	1041.95	-0.868091	0.424391	-2.0455	0.0408058	0.999937	ENSG00000011009	LYPLA2
ENSG00000164305.19	1045.98	-1.0232	0.391122	-2.61607	0.00889481	0.999937	ENSG00000164305	CASP3
ENSG00000197702.14	1054.48	-0.678389	0.332061	-2.04296	0.0410561	0.999937	ENSG00000197702	PARVA
ENSG00000142166.13	1058.21	-0.781356	0.396182	-1.97221	0.0485854	0.999937	ENSG00000142166	IFNAR1
ENSG00000122042.10	1065.4	-0.813592	0.361259	-2.2521	0.0243158	0.999937	ENSG00000122042	UBL3
ENSG00000156030.13	1068.75	-0.656467	0.323422	-2.02975	0.0423816	0.999937	ENSG00000156030	MIDEAS
ENSG00000178860.8	1078.62	-0.765457	0.370376	-2.0667	0.0387621	0.999937	ENSG00000178860	MSC
ENSG00000008282.8	1082.12	-0.864044	0.377703	-2.28763	0.0221593	0.999937	ENSG00000008282	SYPL1
ENSG00000177200.17	1084.93	-0.839864	0.358621	-2.34192	0.0191846	0.999937	ENSG00000177200	CHD9
ENSG00000085365.18	1098.77	-1.01472	0.399013	-2.54308	0.0109879	0.999937	ENSG00000085365	SCAMP1
ENSG00000085719.13	1098.87	-0.797212	0.354479	-2.24897	0.0245147	0.999937	ENSG00000085719	CPNE3
ENSG00000027697.15	1101.86	-0.98294	0.404239	-2.43158	0.0150331	0.999937	ENSG00000027697	IFNGR1
ENSG00000125851.10	1108.44	-0.880107	0.439996	-2.00026	0.045472	0.999937	ENSG00000125851	PCSK2
ENSG00000057252.13	1110.8	-1.15095	0.414209	-2.77867	0.00545827	0.999937	ENSG00000057252	SOAT1
ENSG00000139329.5	1117.49	-1.0963	0.509857	-2.15022	0.031538	0.999937	ENSG00000139329	LUM
ENSG00000155975.10	1130.49	-0.839445	0.393104	-2.13543	0.0327261	0.999937	ENSG00000155975	VPS37A
ENSG00000166340.17	1132.54	-0.696166	0.350203	-1.98789	0.0468237	0.999937	ENSG00000166340	TPP1
ENSG00000136997.20	1141.88	-0.817432	0.369575	-2.21181	0.0269795	0.999937	ENSG00000136997	MYC
ENSG00000013588.9	1163.79	-0.973759	0.479879	-2.02918	0.0424404	0.999937	ENSG00000013588	GPRC5A
ENSG00000184254.17	1169.58	-1.06142	0.373332	-2.8431	0.0044677	0.999937	ENSG00000184254	ALDH1A3
ENSG00000102471.14	1187.71	-0.745754	0.368667	-2.02284	0.0430898	0.999937	ENSG00000102471	NDFIP2
ENSG00000133026.13	1203.68	-0.754487	0.384206	-1.96376	0.0495582	0.999937	ENSG00000133026	MYH10
ENSG00000158769.18	1228.43	-0.91584	0.399319	-2.2935	0.0218191	0.999937	ENSG00000158769	F11R
ENSG00000071282.12	1228.76	-0.77906	0.381524	-2.04197	0.0411547	0.999937	ENSG00000071282	LMCD1
ENSG00000081087.15	1229.98	-0.765279	0.359901	-2.12636	0.0334732	0.999937	ENSG00000081087	OSTM1
ENSG00000139146.14	1231.77	-0.731479	0.321145	-2.27772	0.022743	0.999937	ENSG00000139146	SINHCAF
ENSG00000112759.19	1240.78	-0.804926	0.366051	-2.19895	0.0278817	0.999937	ENSG00000112759	SLC29A1
ENSG00000170248.15	1254.73	-0.993406	0.42575	-2.33331	0.0196321	0.999937	ENSG00000170248	PDCD6IP
ENSG00000120875.9	1260.49	-0.738668	0.355319	-2.07889	0.0376274	0.999937	ENSG00000120875	DUSP4
ENSG00000108176.15	1264.94	-1.4272	0.478567	-2.98224	0.00286143	0.999937	ENSG00000108176	DNAJC12
ENSG00000164949.8	1274.68	-1.18491	0.435224	-2.72252	0.00647858	0.999937	ENSG00000164949	GEM
ENSG00000156875.14	1279.58	-0.935463	0.426228	-2.19475	0.0281816	0.999937	ENSG00000156875	MFSD14A
ENSG00000166974.13	1286.39	-1.00754	0.376117	-2.67879	0.00738881	0.999937	ENSG00000166974	MAPRE2
ENSG00000109854.13	1293.16	-0.770006	0.359302	-2.14306	0.0321084	0.999937	ENSG00000109854	HTATIP2
ENSG00000260916.7	1298.1	-0.761757	0.367662	-2.07189	0.0382753	0.999937	ENSG00000260916	CCPG1
ENSG00000111371.16	1314.42	-0.836913	0.32636	-2.56439	0.0103358	0.999937	ENSG00000111371	SLC38A1
ENSG00000078018.20	1315.83	-0.801851	0.356994	-2.24612	0.0246965	0.999937	ENSG00000078018	MAP2
ENSG00000050130.18	1335.74	-0.777406	0.396139	-1.96246	0.0497094	0.999937	ENSG00000050130	JKAMP
ENSG00000197045.13	1339.74	-0.919572	0.331055	-2.7777	0.00547452	0.999937	ENSG00000197045	GMFB
ENSG00000023318.8	1351.55	-0.696522	0.339142	-2.05378	0.039997	0.999937	ENSG00000023318	ERP44
ENSG00000111711.10	1383.54	-0.82748	0.331184	-2.49855	0.0124702	0.999937	ENSG00000111711	GOLT1B
ENSG00000184575.12	1406.49	-1.01534	0.367117	-2.76571	0.00567989	0.999937	ENSG00000184575	XPOT
ENSG00000158201.10	1437.43	-0.909879	0.407404	-2.23336	0.0255255	0.999937	ENSG00000158201	ABHD3
ENSG00000184205.14	1456.91	-0.749417	0.318608	-2.35216	0.0186649	0.999937	ENSG00000184205	TSPYL2
ENSG00000085117.12	1462.04	-0.752378	0.371943	-2.02283	0.0430903	0.999937	ENSG00000085117	CD82
ENSG00000145423.5	1463.36	-0.769636	0.376039	-2.04669	0.0406882	0.999937	ENSG00000145423	SFRP2
ENSG00000107679.14	1475.75	-1.18633	0.373862	-3.17317	0.00150782	0.999937	ENSG00000107679	PLEKHA1
ENSG00000106537.8	1491.64	-0.851374	0.375136	-2.2695	0.0232377	0.999937	ENSG00000106537	TSPAN13
ENSG00000165507.9	1495.14	-1.40521	0.430606	-3.26333	0.00110111	0.999937	ENSG00000165507	DEPP1
ENSG00000114439.19	1511.9	-0.692523	0.3148	-2.19988	0.0278151	0.999937	ENSG00000114439	BBX
ENSG00000182149.21	1517.07	-0.704935	0.337068	-2.09137	0.0364946	0.999937	ENSG00000182149	IST1
ENSG00000285976.2	1521.9	-0.825322	0.376604	-2.19149	0.0284167	0.999937	ENSG00000285976	AL135905.2
ENSG00000138600.10	1565.36	-0.683508	0.327372	-2.08786	0.0368103	0.999937	ENSG00000138600	SPPL2A
ENSG00000204386.11	1616.18	-0.725719	0.346705	-2.09319	0.0363325	0.999937	ENSG00000204386	NEU1
ENSG00000131238.18	1648.61	-0.850023	0.394134	-2.15668	0.0310303	0.999937	ENSG00000131238	PPT1
ENSG00000205302.7	1657.8	-0.705724	0.346508	-2.03668	0.0416825	0.999937	ENSG00000205302	SNX2
ENSG00000113083.14	1677.82	-0.995092	0.380401	-2.6159	0.00889925	0.999937	ENSG00000113083	LOX
ENSG00000117335.20	1687.43	-1.08444	0.430992	-2.51615	0.0118643	0.999937	ENSG00000117335	CD46
ENSG00000155304.6	1690.15	-0.739162	0.354281	-2.08637	0.0369451	0.999937	ENSG00000155304	HSPA13
ENSG00000104763.20	1693.69	-0.839264	0.368555	-2.27717	0.0227759	0.999937	ENSG00000104763	ASAH1
ENSG00000099194.6	1725.37	-0.912814	0.459928	-1.98469	0.0471792	0.999937	ENSG00000099194	SCD
ENSG00000113328.19	1731.09	-0.811146	0.360553	-2.24973	0.0244663	0.999937	ENSG00000113328	CCNG1
ENSG00000175582.20	1763.76	-0.864455	0.357042	-2.42116	0.0154711	0.999937	ENSG00000175582	RAB6A
ENSG00000139921.13	1791.51	-0.899563	0.430933	-2.08748	0.0368451	0.999937	ENSG00000139921	TMX1
ENSG00000100852.13	1793.93	-0.736259	0.337778	-2.17971	0.0292786	0.999937	ENSG00000100852	ARHGAP5
ENSG00000013375.16	1810.74	-0.671949	0.325133	-2.06669	0.0387633	0.999937	ENSG00000013375	PGM3
ENSG00000198843.13	1811.73	-0.773744	0.377176	-2.05141	0.0402267	0.999937	ENSG00000198843	SELENOT
ENSG00000104112.9	1833.07	-1.1027	0.459409	-2.40026	0.0163833	0.999937	ENSG00000104112	SCG3
ENSG00000177565.18	1879.54	-0.8656	0.415129	-2.08514	0.037057	0.999937	ENSG00000177565	TBL1XR1
ENSG00000163683.12	1928.55	-0.908853	0.342923	-2.65031	0.00804171	0.999937	ENSG00000163683	SMIM14
ENSG00000146072.6	1955.8	-0.856666	0.394831	-2.16971	0.0300291	0.999937	ENSG00000146072	TNFRSF21
ENSG00000117143.13	1969.83	-0.940391	0.366914	-2.56297	0.010378	0.999937	ENSG00000117143	UAP1
ENSG00000086619.14	1998.15	-1.41505	0.416733	-3.39557	0.000684863	0.871202	ENSG00000086619	ERO1B
ENSG00000056097.16	2037.22	-0.79999	0.377765	-2.11769	0.0342013	0.999937	ENSG00000056097	ZFR
ENSG00000132824.14	2040.15	-0.734939	0.349896	-2.10045	0.0356891	0.999937	ENSG00000132824	SERINC3
ENSG00000269926.1	2057.59	-0.988381	0.35038	-2.82088	0.0047892	0.999937	ENSG00000269926	DDIT4-AS1
ENSG00000077232.18	2086.38	-0.952167	0.369573	-2.57639	0.00998369	0.999937	ENSG00000077232	DNAJC10
ENSG00000158985.13	2154.59	-0.815154	0.367558	-2.21776	0.0265713	0.999937	ENSG00000158985	CDC42SE2
ENSG00000248223.1	2164.52	-1.0015	0.407481	-2.45778	0.0139799	0.999937	ENSG00000248223	AC026785.2
ENSG00000169116.11	2180.19	-0.902283	0.444427	-2.03022	0.0423344	0.999937	ENSG00000169116	PARM1
ENSG00000122861.16	2232.17	-0.902907	0.38919	-2.31997	0.0203426	0.999937	ENSG00000122861	PLAU
ENSG00000005893.16	2285.71	-0.922157	0.397393	-2.32052	0.020313	0.999937	ENSG00000005893	LAMP2
ENSG00000186340.15	2373.54	-0.715346	0.322617	-2.21732	0.026601	0.999937	ENSG00000186340	THBS2
ENSG00000169903.7	2394.91	-1.28702	0.448705	-2.86829	0.00412693	0.999937	ENSG00000169903	TM4SF4
ENSG00000214548.18	2431.6	-0.795282	0.384503	-2.06834	0.0386085	0.999937	ENSG00000214548	MEG3
ENSG00000136842.14	2443.78	-1.08733	0.404326	-2.68925	0.0071613	0.999937	ENSG00000136842	TMOD1
ENSG00000113575.10	2503.54	-1.03084	0.454167	-2.26974	0.0232236	0.999937	ENSG00000113575	PPP2CA
ENSG00000171928.14	2519.52	-0.859996	0.342375	-2.51185	0.0120099	0.999937	ENSG00000171928	TVP23B
ENSG00000181722.17	2529.92	-0.719784	0.331092	-2.17397	0.0297075	0.999937	ENSG00000181722	ZBTB20
ENSG00000101255.11	2597.98	-0.90862	0.37136	-2.44674	0.0144155	0.999937	ENSG00000101255	TRIB3
ENSG00000183283.16	2656.42	-0.690272	0.347331	-1.98736	0.0468826	0.999937	ENSG00000183283	DAZAP2
ENSG00000198898.14	2744.37	-0.922093	0.414855	-2.22269	0.026237	0.999937	ENSG00000198898	CAPZA2
ENSG00000112245.12	2977.55	-1.03882	0.388877	-2.67134	0.00755498	0.999937	ENSG00000112245	PTP4A1
ENSG00000115963.13	2978.59	-0.744624	0.325932	-2.2846	0.0223363	0.999937	ENSG00000115963	RND3
ENSG00000111897.7	2992.76	-0.75115	0.356693	-2.10587	0.0352156	0.999937	ENSG00000111897	SERINC1
ENSG00000128590.5	2992.82	-0.706808	0.337134	-2.09652	0.0360359	0.999937	ENSG00000128590	DNAJB9
ENSG00000084733.11	3134.72	-0.61695	0.314296	-1.96296	0.0496514	0.999937	ENSG00000084733	RAB10
ENSG00000140105.18	3198.96	-0.762098	0.32016	-2.38037	0.0172952	0.999937	ENSG00000140105	WARS1
ENSG00000163814.8	3223.21	-0.734939	0.350092	-2.09927	0.0357928	0.999937	ENSG00000163814	CDCP1
ENSG00000151914.20	3276.03	-0.664003	0.310123	-2.14109	0.0322666	0.999937	ENSG00000151914	DST
ENSG00000116285.13	3498.5	-0.759287	0.342993	-2.21371	0.0268488	0.999937	ENSG00000116285	ERRFI1
ENSG00000133872.14	3588.66	-0.698851	0.346097	-2.01923	0.0434629	0.999937	ENSG00000133872	SARAF
ENSG00000182670.13	3654.37	-0.746968	0.355014	-2.10405	0.0353741	0.999937	ENSG00000182670	TTC3
ENSG00000159200.18	3714.39	-1.29319	0.408733	-3.16391	0.00155667	0.999937	ENSG00000159200	RCAN1
ENSG00000137575.12	3767.75	-0.915029	0.364841	-2.50802	0.0121409	0.999937	ENSG00000137575	SDCBP
ENSG00000166922.8	3899.97	-0.839936	0.405934	-2.06914	0.0385326	0.999937	ENSG00000166922	SCG5
ENSG00000076554.15	3926.54	-0.936732	0.383214	-2.44441	0.014509	0.999937	ENSG00000076554	TPD52
ENSG00000070081.17	3996.49	-0.753186	0.360273	-2.0906	0.0365642	0.999937	ENSG00000070081	NUCB2
ENSG00000138449.11	4169.96	-1.32216	0.445437	-2.96823	0.00299521	0.999937	ENSG00000138449	SLC40A1
ENSG00000113369.9	4177.78	-0.712736	0.315626	-2.25817	0.0239351	0.999937	ENSG00000113369	ARRDC3
ENSG00000177606.7	4216.49	-0.98671	0.498473	-1.97947	0.0477636	0.999937	ENSG00000177606	JUN
ENSG00000010404.18	4296.73	-0.903077	0.372371	-2.42521	0.0152997	0.999937	ENSG00000010404	IDS
ENSG00000112697.17	4647.59	-0.76282	0.38128	-2.00068	0.0454267	0.999937	ENSG00000112697	TMEM30A
ENSG00000004799.8	4730.22	-1.64319	0.486383	-3.37839	0.000729121	0.883206	ENSG00000004799	PDK4
ENSG00000023445.16	5072.43	-0.700685	0.33075	-2.11847	0.0341351	0.999937	ENSG00000023445	BIRC3
ENSG00000067167.8	5242.35	-0.881695	0.37546	-2.3483	0.0188591	0.999937	ENSG00000067167	TRAM1
ENSG00000116209.12	5262.79	-0.678084	0.342692	-1.9787	0.0478501	0.999937	ENSG00000116209	TMEM59
ENSG00000104635.14	5408.26	-0.975225	0.335836	-2.90387	0.00368582	0.999937	ENSG00000104635	SLC39A14
ENSG00000168209.5	5465.25	-1.07086	0.343238	-3.11988	0.00180922	0.999937	ENSG00000168209	DDIT4
ENSG00000115828.17	5519.14	-1.08748	0.41554	-2.61703	0.00886985	0.999937	ENSG00000115828	QPCT
ENSG00000067082.15	5580.93	-1.00611	0.362763	-2.77347	0.00554615	0.999937	ENSG00000067082	KLF6
ENSG00000105835.12	5767.48	-1.07187	0.343342	-3.12187	0.00179705	0.999937	ENSG00000105835	NAMPT
ENSG00000163430.12	6338.9	-0.736062	0.370988	-1.98406	0.0472493	0.999937	ENSG00000163430	FSTL1
ENSG00000185650.10	6879.41	-0.947964	0.389614	-2.43308	0.0149709	0.999937	ENSG00000185650	ZFP36L1
ENSG00000131711.15	7881.36	-0.979533	0.399654	-2.45095	0.0142479	0.999937	ENSG00000131711	MAP1B
ENSG00000163734.4	7943.06	-0.647615	0.314534	-2.05897	0.0394973	0.999937	ENSG00000163734	CXCL3
ENSG00000130066.16	8221.27	-0.923109	0.349121	-2.6441	0.00819095	0.999937	ENSG00000130066	SAT1
ENSG00000204592.9	8321.91	-0.682257	0.341716	-1.99656	0.0458732	0.999937	ENSG00000204592	HLA-E
ENSG00000118785.14	8386.77	-0.730987	0.325935	-2.24274	0.0249135	0.999937	ENSG00000118785	SPP1
ENSG00000051108.15	9186.69	-0.737865	0.309226	-2.38617	0.017025	0.999937	ENSG00000051108	HERPUD1
ENSG00000127022.15	9193.96	-0.701089	0.341228	-2.0546	0.0399173	0.999937	ENSG00000127022	CANX
ENSG00000113140.11	10655.4	-0.80748	0.374772	-2.15459	0.0311936	0.999937	ENSG00000113140	SPARC
ENSG00000164733.21	10902.3	-0.78296	0.38576	-2.02966	0.0423913	0.999937	ENSG00000164733	CTSB
ENSG00000124762.14	12630.2	-0.830126	0.329442	-2.51979	0.0117424	0.999937	ENSG00000124762	CDKN1A
ENSG00000118271.12	13434.1	-0.977953	0.458728	-2.13188	0.0330168	0.999937	ENSG00000118271	TTR
ENSG00000254647.7	14191.1	-1.09084	0.434053	-2.51315	0.0119657	0.999937	ENSG00000254647	INS
ENSG00000167004.13	14796.8	-0.721962	0.330797	-2.18249	0.0290734	0.999937	ENSG00000167004	PDIA3
ENSG00000089199.10	18895.9	-0.771597	0.376217	-2.05093	0.0402733	0.999937	ENSG00000089199	CHGB
ENSG00000106366.9	19703.5	-0.776984	0.364494	-2.13168	0.0330331	0.999937	ENSG00000106366	SERPINE1
ENSG00000161011.20	20250.2	-0.859042	0.390706	-2.19869	0.0278997	0.999937	ENSG00000161011	SQSTM1
ENSG00000167996.16	120293	-0.921343	0.426358	-2.16096	0.0306981	0.999937	ENSG00000167996	FTH1
ENSG00000115263.15	235954	-1.10425	0.496047	-2.2261	0.0260076	0.999937	ENSG00000115263	GCG

## Sheet: DEseq2_results_noNA_geneName>10
Supplemental Table 7. Differential Gene expression (Fold change) in human islets infected with pAd-MIR125B versus control . All detected genes are shown
Gene.stable.ID.version	baseMean	log2FoldChange	lfcSE	stat	pvalue	padj	Gene.stable.ID	Gene.name
ENSG00000273520.5	10.001	-1.63716	1.39692	-1.17198	0.241206	0.999937	ENSG00000273520	SPDYE8
ENSG00000185736.16	10.0014	1.7942	1.21913	1.4717	0.141103	0.999937	ENSG00000185736	ADARB2
ENSG00000002726.21	10.0091	-0.451651	1.22985	-0.367242	0.713438	0.999937	ENSG00000002726	AOC1
ENSG00000287978.1	10.0148	0.367233	1.21756	0.301613	0.762947	0.999937	ENSG00000287978	AC245407.2
ENSG00000287679.1	10.0185	1.14844	1.32277	0.868214	0.385277	0.999937	ENSG00000287679	AL355347.1
ENSG00000230805.8	10.019	-0.491886	1.2154	-0.40471	0.68569	0.999937	ENSG00000230805	AL132709.7
ENSG00000281195.1	10.02	-0.769348	1.18551	-0.648957	0.516366	0.999937	ENSG00000281195	AC007878.1
ENSG00000283757.1	10.0202	0.0527044	1.19446	0.0441241	0.964806	0.999937	ENSG00000283757	AL031686.1
ENSG00000263798.2	10.0217	0.0813068	3.85022	0.0211174	0.983152	0.999937	ENSG00000263798	AC018521.1
ENSG00000237883.2	10.0242	-1.07715	1.1908	-0.904559	0.365699	0.999937	ENSG00000237883	DGUOK-AS1
ENSG00000145217.14	10.0306	0.374896	1.40502	0.266827	0.789603	0.999937	ENSG00000145217	SLC26A1
ENSG00000238133.6	10.0325	0.956457	1.21537	0.786966	0.431302	0.999937	ENSG00000238133	MAP3K20-AS1
ENSG00000221836.3	10.0348	1.43871	1.41192	1.01897	0.308217	0.999937	ENSG00000221836	OR2A5
ENSG00000268555.2	10.0425	-0.48804	1.21236	-0.402556	0.687275	0.999937	ENSG00000268555	AC123912.4
ENSG00000232827.3	10.0442	4.57314	1.59586	2.86563	0.00416183	0.999937	ENSG00000232827	LINC01189
ENSG00000275964.1	10.0461	-0.5823	1.26818	-0.459162	0.646118	0.999937	ENSG00000275964	AL355001.2
ENSG00000272808.4	10.0489	0.600382	1.38799	0.432556	0.665337	0.999937	ENSG00000272808	AC015712.6
ENSG00000157330.10	10.0507	1.58335	1.35383	1.16953	0.242189	0.999937	ENSG00000157330	C1orf158
ENSG00000197980.13	10.0514	0.327441	1.26111	0.259645	0.795137	0.999937	ENSG00000197980	LEKR1
ENSG00000273108.1	10.0559	0.417593	1.24299	0.335957	0.736903	0.999937	ENSG00000273108	AL121929.2
ENSG00000255052.5	10.0587	0.628667	1.23587	0.508683	0.610975	0.999937	ENSG00000255052	FAM66D
ENSG00000100583.4	10.063	0.254902	1.21266	0.2102	0.833512	0.999937	ENSG00000100583	SAMD15
ENSG00000264204.2	10.0705	0.981916	1.42875	0.687255	0.491922	0.999937	ENSG00000264204	AGAP7P
ENSG00000172771.12	10.0764	0.446434	1.35854	0.328614	0.742448	0.999937	ENSG00000172771	EFCAB12
ENSG00000285330.1	10.0768	-5.87655	3.91783	-1.49995	0.133627	0.999937	ENSG00000285330	AC126283.2
ENSG00000123870.10	10.0812	-0.555327	1.36967	-0.405444	0.685151	0.999937	ENSG00000123870	ZNF137P
ENSG00000165762.3	10.084	1.44681	1.65363	0.874926	0.381614	0.999937	ENSG00000165762	OR4K2
ENSG00000143127.13	10.0842	0.811743	1.25366	0.647498	0.51731	0.999937	ENSG00000143127	ITGA10
ENSG00000258813.2	10.0877	0.274903	1.1655	0.235867	0.813536	0.999937	ENSG00000258813	AL442663.3
ENSG00000146938.16	10.089	0.353213	1.19334	0.295986	0.767241	0.999937	ENSG00000146938	NLGN4X
ENSG00000272221.1	10.0946	0.216417	1.17782	0.183743	0.854215	0.999937	ENSG00000272221	AL645933.2
ENSG00000233296.2	10.1018	0.925177	1.17281	0.788857	0.430195	0.999937	ENSG00000233296	TMEM18-DT
ENSG00000168421.13	10.1044	1.95241	1.40661	1.38802	0.165131	0.999937	ENSG00000168421	RHOH
ENSG00000246339.6	10.1113	0.863168	1.35441	0.637301	0.523929	0.999937	ENSG00000246339	EXTL3-AS1
ENSG00000278002.1	10.1158	-0.0831835	1.26486	-0.0657648	0.947565	0.999937	ENSG00000278002	AL627171.1
ENSG00000266933.2	10.1171	-0.367149	1.2239	-0.299982	0.764191	0.999937	ENSG00000266933	AC005775.1
ENSG00000229334.1	10.1201	0.60568	1.17353	0.51612	0.605771	0.999937	ENSG00000229334	AC046143.1
ENSG00000108231.14	10.1221	3.08461	1.45535	2.1195	0.0340486	0.999937	ENSG00000108231	LGI1
ENSG00000259169.1	10.1243	-5.59455	3.92084	-1.42688	0.153616	0.999937	ENSG00000259169	GNRHR2P1
ENSG00000143869.7	10.1254	2.45087	1.3748	1.78271	0.0746334	0.999937	ENSG00000143869	GDF7
ENSG00000224903.2	10.1256	-0.837494	1.19889	-0.698558	0.484828	0.999937	ENSG00000224903	RNF32-AS1
ENSG00000256463.8	10.129	6.31108	1.76664	3.57237	0.000353769	0.675035	ENSG00000256463	SALL3
ENSG00000138100.14	10.1297	1.93078	1.38493	1.39413	0.163277	0.999937	ENSG00000138100	TRIM54
ENSG00000278936.1	10.1316	0.545347	1.37943	0.395343	0.69259	0.999937	ENSG00000278936	AC244517.4
ENSG00000278156.2	10.1344	0.518428	1.19654	0.433274	0.664816	0.999937	ENSG00000278156	TSC22D1-AS1
ENSG00000119686.10	10.1354	0.687493	1.21154	0.567454	0.570406	0.999937	ENSG00000119686	FLVCR2
ENSG00000267757.4	10.1367	0.567091	1.18722	0.477662	0.632891	0.999937	ENSG00000267757	EML2-AS1
ENSG00000253553.7	10.1415	0.0161545	1.38614	0.0116543	0.990701	0.999937	ENSG00000253553	AC090578.1
ENSG00000180592.17	10.1491	2.12406	1.22284	1.73699	0.0823893	0.999937	ENSG00000180592	SKIDA1
ENSG00000166573.6	10.1497	1.42052	1.4618	0.971759	0.331171	0.999937	ENSG00000166573	GALR1
ENSG00000231104.8	10.1529	0.747375	1.18065	0.633021	0.52672	0.999937	ENSG00000231104	AC022395.1
ENSG00000226913.2	10.1578	-0.262259	1.19895	-0.218741	0.826852	0.999937	ENSG00000226913	BSN-DT
ENSG00000218283.2	10.1634	-1.73956	1.2499	-1.39176	0.163994	0.999937	ENSG00000218283	MORF4L1P1
ENSG00000172139.15	10.1638	-1.1163	1.25252	-0.891245	0.372798	0.999937	ENSG00000172139	SLC9C1
ENSG00000285684.1	10.1657	0.396085	1.39928	0.283064	0.777128	0.999937	ENSG00000285684	AL137781.1
ENSG00000251322.9	10.168	1.99757	1.31921	1.51422	0.129971	0.999937	ENSG00000251322	SHANK3
ENSG00000245384.2	10.1691	0.709023	1.31109	0.540791	0.588652	0.999937	ENSG00000245384	CXXC4-AS1
ENSG00000237927.1	10.1694	-0.269531	1.24398	-0.216668	0.828467	0.999937	ENSG00000237927	AL078604.2
ENSG00000236334.2	10.172	3.08021	1.42202	2.16608	0.0303047	0.999937	ENSG00000236334	PPIAL4G
ENSG00000142235.11	10.1725	0.129765	1.31764	0.098483	0.921549	0.999937	ENSG00000142235	LMTK3
ENSG00000204936.10	10.1733	-1.16799	1.33827	-0.872757	0.382796	0.999937	ENSG00000204936	CD177
ENSG00000196366.3	10.1754	1.92631	1.24607	1.54591	0.122126	0.999937	ENSG00000196366	C9orf163
ENSG00000275601.1	10.1796	-0.698085	1.2089	-0.577453	0.563633	0.999937	ENSG00000275601	AC011330.2
ENSG00000130649.10	10.1828	-1.11852	1.2595	-0.888065	0.374506	0.999937	ENSG00000130649	CYP2E1
ENSG00000245330.4	10.1863	-0.281599	1.16649	-0.241408	0.809239	0.999937	ENSG00000245330	AP005717.1
ENSG00000259345.7	10.1866	2.79264	1.38894	2.01062	0.0443654	0.999937	ENSG00000259345	AC013652.1
ENSG00000165837.12	10.1892	-1.16366	1.32491	-0.878292	0.379785	0.999937	ENSG00000165837	ERICH6B
ENSG00000148948.8	10.1946	0.322992	1.20624	0.267768	0.788878	0.999937	ENSG00000148948	LRRC4C
ENSG00000261067.7	10.2037	1.34751	1.20225	1.12083	0.262361	0.999937	ENSG00000261067	AC109460.3
ENSG00000286943.1	10.2091	0.409476	1.34041	0.305485	0.759997	0.999937	ENSG00000286943	AP001992.2
ENSG00000287544.1	10.2103	0.760001	1.54385	0.492277	0.622524	0.999937	ENSG00000287544	AC097518.2
ENSG00000149403.13	10.2136	2.83702	1.60858	1.76368	0.0777865	0.999937	ENSG00000149403	GRIK4
ENSG00000260774.1	10.2151	0.754087	1.16815	0.645542	0.518576	0.999937	ENSG00000260774	AC021087.3
ENSG00000163462.18	10.2167	1.28121	1.21183	1.05725	0.290396	0.999937	ENSG00000163462	TRIM46
ENSG00000237807.4	10.2218	2.57546	1.33587	1.92792	0.0538646	0.999937	ENSG00000237807	AC022034.1
ENSG00000237372.4	10.2234	1.13662	1.27349	0.892523	0.372113	0.999937	ENSG00000237372	UNQ6494
ENSG00000248898.3	10.2269	0.77077	1.21692	0.633376	0.526488	0.999937	ENSG00000248898	AC022126.1
ENSG00000161082.13	10.2269	1.63305	1.36773	1.19398	0.232486	0.999937	ENSG00000161082	CELF5
ENSG00000261713.6	10.2296	0.674607	1.19219	0.565855	0.571492	0.999937	ENSG00000261713	SSTR5-AS1
ENSG00000184185.10	10.2296	1.6468	1.4019	1.17469	0.240117	0.999937	ENSG00000184185	KCNJ12
ENSG00000248477.6	10.2361	0.650171	1.15712	0.561885	0.574194	0.999937	ENSG00000248477	NAIPP3
ENSG00000275097.1	10.2389	1.28743	1.29937	0.990811	0.321778	0.999937	ENSG00000275097	AC024940.5
ENSG00000269680.1	10.24	-0.173616	1.19473	-0.145318	0.88446	0.999937	ENSG00000269680	AC008760.1
ENSG00000228876.4	10.2402	4.10886	1.55261	2.64642	0.00813486	0.999937	ENSG00000228876	AC010745.2
ENSG00000144821.10	10.2425	-2.30588	1.33894	-1.72216	0.08504	0.999937	ENSG00000144821	MYH15
ENSG00000181585.7	10.2429	0.38236	1.19341	0.320393	0.74867	0.999937	ENSG00000181585	TMIE
ENSG00000250510.8	10.2504	1.16416	1.39074	0.837079	0.402548	0.999937	ENSG00000250510	GPR162
ENSG00000196361.10	10.2518	2.94529	1.44539	2.0377	0.0415795	0.999937	ENSG00000196361	ELAVL3
ENSG00000273320.1	10.2607	0.627281	1.17526	0.533738	0.593523	0.999937	ENSG00000273320	AC007032.1
ENSG00000250982.2	10.2659	0.450414	1.27221	0.354041	0.723308	0.999937	ENSG00000250982	GAPDHP35
ENSG00000257900.2	10.2659	0.185271	3.89568	0.047558	0.962068	0.999937	ENSG00000257900	AL162632.1
ENSG00000173262.11	10.266	3.86486	1.81287	2.1319	0.0330149	0.999937	ENSG00000173262	SLC2A14
ENSG00000234498.3	10.2691	1.60276	1.35427	1.18348	0.236618	0.999937	ENSG00000234498	RPL13AP20
ENSG00000273391.1	10.27	-0.0674836	1.22748	-0.0549773	0.956157	0.999937	ENSG00000273391	AC083880.1
ENSG00000143196.5	10.2716	0.0597449	1.18234	0.050531	0.959699	0.999937	ENSG00000143196	DPT
ENSG00000276710.4	10.2724	0.433891	1.18413	0.366423	0.71405	0.999937	ENSG00000276710	CSPG4P10
ENSG00000275494.1	10.2755	-0.638938	1.17491	-0.54382	0.586565	0.999937	ENSG00000275494	AC133552.5
ENSG00000283122.1	10.2803	0.678394	1.19515	0.567624	0.57029	0.999937	ENSG00000283122	HYMAI
ENSG00000279520.1	10.2829	-0.171215	1.17099	-0.146214	0.883752	0.999937	ENSG00000279520	AC093525.8
ENSG00000261202.1	10.2853	0.140872	1.22077	0.115395	0.908132	0.999937	ENSG00000261202	Z83847.1
ENSG00000167780.12	10.2855	-1.47649	1.33171	-1.10872	0.267553	0.999937	ENSG00000167780	SOAT2
ENSG00000184524.6	10.286	0.636675	1.27352	0.499934	0.617121	0.999937	ENSG00000184524	CEND1
ENSG00000196456.13	10.2882	1.09718	1.19944	0.914742	0.360327	0.999937	ENSG00000196456	ZNF775
ENSG00000251191.8	10.2967	-0.701988	1.4694	-0.477739	0.632836	0.999937	ENSG00000251191	LINC00589
ENSG00000269959.1	10.2986	0.684061	1.16491	0.58722	0.557056	0.999937	ENSG00000269959	SPACA6P-AS
ENSG00000236709.1	10.3004	-0.0802977	1.23237	-0.0651573	0.948049	0.999937	ENSG00000236709	DAPK1-IT1
ENSG00000286588.1	10.3046	0.17103	1.21341	0.140949	0.88791	0.999937	ENSG00000286588	AC104841.1
ENSG00000136944.19	10.3049	-0.286544	1.39083	-0.206024	0.836772	0.999937	ENSG00000136944	LMX1B
ENSG00000204889.10	10.3163	-0.608983	1.32493	-0.459634	0.645779	0.999937	ENSG00000204889	KRT40
ENSG00000113262.16	10.3196	0.839173	1.43527	0.584681	0.558762	0.999937	ENSG00000113262	GRM6
ENSG00000163710.9	10.3232	0.167049	1.17077	0.142683	0.886541	0.999937	ENSG00000163710	PCOLCE2
ENSG00000104888.10	10.3261	0.245507	1.29907	0.188987	0.850103	0.999937	ENSG00000104888	SLC17A7
ENSG00000214787.10	10.3266	0.688778	1.25943	0.546896	0.58445	0.999937	ENSG00000214787	MS4A4E
ENSG00000236021.2	10.3362	-1.36378	1.38544	-0.984361	0.324938	0.999937	ENSG00000236021	AL591043.2
ENSG00000235530.7	10.3396	1.39698	1.20551	1.15884	0.246523	0.999937	ENSG00000235530	AC087294.1
ENSG00000128346.11	10.3428	-0.265217	1.16683	-0.227296	0.820194	0.999937	ENSG00000128346	C22orf23
ENSG00000236155.6	10.3443	1.32334	1.20044	1.10239	0.270294	0.999937	ENSG00000236155	ZPLD2P
ENSG00000230453.9	10.3487	3.72777	1.54855	2.40726	0.0160727	0.999937	ENSG00000230453	ANKRD18B
ENSG00000224769.1	10.3489	-0.309219	1.16207	-0.266094	0.790167	0.999937	ENSG00000224769	MUC20P1
ENSG00000257000.1	10.3502	0.593473	1.16314	0.510233	0.609888	0.999937	ENSG00000257000	AC137590.1
ENSG00000287817.1	10.3545	0.157749	1.2092	0.130458	0.896204	0.999937	ENSG00000287817	AL096701.4
ENSG00000204695.4	10.3577	1.18047	1.34576	0.87718	0.380389	0.999937	ENSG00000204695	OR14J1
ENSG00000233954.6	10.3586	0.729025	1.2398	0.58802	0.556519	0.999937	ENSG00000233954	UQCRHL
ENSG00000272146.6	10.3643	0.362378	1.22898	0.29486	0.768101	0.999937	ENSG00000272146	ARF4-AS1
ENSG00000124507.11	10.3763	-0.0883547	1.18509	-0.0745553	0.940569	0.999937	ENSG00000124507	PACSIN1
ENSG00000226711.7	10.3789	-0.0924327	1.17767	-0.078488	0.93744	0.999937	ENSG00000226711	FAM66C
ENSG00000235527.7	10.3838	-0.76073	1.21794	-0.624603	0.532232	0.999937	ENSG00000235527	HIPK1-AS1
ENSG00000145244.12	10.3853	1.21667	1.22693	0.991642	0.321372	0.999937	ENSG00000145244	CORIN
ENSG00000156414.19	10.3889	0.840094	1.22316	0.686823	0.492195	0.999937	ENSG00000156414	TDRD9
ENSG00000232564.3	10.3982	0.324475	1.18138	0.274658	0.783579	0.999937	ENSG00000232564	MRTFA-AS1
ENSG00000235613.2	10.4041	1.14065	1.18006	0.966601	0.333743	0.999937	ENSG00000235613	NSRP1P1
ENSG00000134817.11	10.4066	1.70288	1.40098	1.2155	0.224176	0.999937	ENSG00000134817	APLNR
ENSG00000275708.1	10.4099	2.36143	1.66909	1.4148	0.157127	0.999937	ENSG00000275708	MIR3648-1
ENSG00000152954.12	10.4137	2.59689	1.23213	2.10765	0.0350616	0.999937	ENSG00000152954	NRSN1
ENSG00000285329.1	10.4148	0.114676	1.18459	0.0968061	0.92288	0.999937	ENSG00000285329	AC025283.2
ENSG00000153993.13	10.4155	0.450808	1.2875	0.350142	0.726232	0.999937	ENSG00000153993	SEMA3D
ENSG00000204950.4	10.4162	1.58682	1.20122	1.32101	0.186498	0.999937	ENSG00000204950	LRRC10B
ENSG00000244693.1	10.419	-2.72066	1.59157	-1.70942	0.0873736	0.999937	ENSG00000244693	CTAGE8
ENSG00000149043.16	10.4233	2.71618	1.50032	1.81041	0.0702327	0.999937	ENSG00000149043	SYT8
ENSG00000229676.3	10.4239	0.103798	1.17773	0.0881339	0.92977	0.999937	ENSG00000229676	ZNF492
ENSG00000236502.1	10.4338	0.738417	1.30772	0.56466	0.572305	0.999937	ENSG00000236502	SIX3-AS1
ENSG00000206159.11	10.4345	0.279516	1.28706	0.217175	0.828072	0.999937	ENSG00000206159	GYG2P1
ENSG00000246922.8	10.436	0.554692	1.17033	0.473961	0.635528	0.999937	ENSG00000246922	UBAP1L
ENSG00000148965.10	10.4384	-0.818488	1.24532	-0.657249	0.511021	0.999937	ENSG00000148965	SAA4
ENSG00000179776.19	10.4396	1.56085	1.23258	1.26632	0.205397	0.999937	ENSG00000179776	CDH5
ENSG00000280129.1	10.4405	1.13321	1.15822	0.978402	0.327876	0.999937	ENSG00000280129	AL132780.5
ENSG00000197363.9	10.4407	0.543099	1.17195	0.463415	0.643067	0.999937	ENSG00000197363	ZNF517
ENSG00000262094.1	10.4497	-0.822135	1.41178	-0.582341	0.560337	0.999937	ENSG00000262094	AC139099.1
ENSG00000237949.2	10.4556	3.27124	1.45818	2.24338	0.0248725	0.999937	ENSG00000237949	LINC00844
ENSG00000162490.7	10.4557	0.787384	1.37942	0.570808	0.56813	0.999937	ENSG00000162490	DRAXIN
ENSG00000280193.1	10.46	0.654531	1.20456	0.543378	0.586869	0.999937	ENSG00000280193	AC132219.2
ENSG00000203618.6	10.4644	-0.260397	1.70314	-0.152893	0.878483	0.999937	ENSG00000203618	GP1BB
ENSG00000266283.1	10.4717	0.0840851	1.15971	0.0725052	0.9422	0.999937	ENSG00000266283	AC091588.3
ENSG00000285051.2	10.4718	0.559377	1.36272	0.410486	0.68145	0.999937	ENSG00000285051	SLC7A14-AS1
ENSG00000224738.1	10.472	0.223365	1.17888	0.189472	0.849723	0.999937	ENSG00000224738	AC099850.1
ENSG00000249310.2	10.4724	-0.413625	1.18453	-0.349188	0.726948	0.999937	ENSG00000249310	APOBEC3B-AS1
ENSG00000267152.1	10.4725	0.65241	1.14658	0.569005	0.569353	0.999937	ENSG00000267152	AC093227.1
ENSG00000259520.6	10.4732	-0.224184	1.37995	-0.162458	0.870945	0.999937	ENSG00000259520	AC051619.4
ENSG00000269570.2	10.4897	0.863484	1.28967	0.669538	0.503152	0.999937	ENSG00000269570	AP001350.1
ENSG00000164920.9	10.4907	0.877874	1.36304	0.644058	0.519538	0.999937	ENSG00000164920	OSR2
ENSG00000176798.2	10.491	3.98094	1.72812	2.30363	0.0212435	0.999937	ENSG00000176798	OR51L1
ENSG00000259954.1	10.4947	2.04507	1.37377	1.48865	0.136579	0.999937	ENSG00000259954	IL21R-AS1
ENSG00000253457.3	10.4955	-0.581642	1.29727	-0.448357	0.653896	0.999937	ENSG00000253457	SMIM18
ENSG00000232043.1	10.4986	0.229562	1.15419	0.198894	0.842346	0.999937	ENSG00000232043	AL133230.1
ENSG00000230825.2	10.5008	-0.628272	1.14849	-0.547044	0.584349	0.999937	ENSG00000230825	AC005532.1
ENSG00000251637.6	10.5008	0.159135	1.45464	0.109398	0.912887	0.999937	ENSG00000251637	LINC02754
ENSG00000179071.5	10.5018	0.889269	1.2345	0.720345	0.471313	0.999937	ENSG00000179071	CCDC89
ENSG00000224046.2	10.5033	-0.261006	1.26431	-0.206442	0.836446	0.999937	ENSG00000224046	AC005076.1
ENSG00000205056.8	10.5034	3.99821	1.61937	2.46899	0.0135496	0.999937	ENSG00000205056	LINC02397
ENSG00000284294.1	10.5077	5.51159	3.90981	1.40968	0.158634	0.999937	ENSG00000284294	AC007326.5
ENSG00000271605.6	10.5138	0.236376	1.21259	0.194936	0.845443	0.999937	ENSG00000271605	MILR1
ENSG00000197177.15	10.5143	0.868158	1.19261	0.72795	0.466644	0.999937	ENSG00000197177	ADGRA1
ENSG00000277067.4	10.5159	0.0357531	1.73415	0.0206171	0.983551	0.999937	ENSG00000277067	CU634019.1
ENSG00000225361.4	10.516	0.419514	1.18981	0.352588	0.724397	0.999937	ENSG00000225361	PPP1R26-AS1
ENSG00000218596.2	10.5165	-0.44649	1.23541	-0.361411	0.717792	0.999937	ENSG00000218596	AL162578.1
ENSG00000158517.15	10.5194	-0.42248	1.35257	-0.312354	0.754771	0.999937	ENSG00000158517	NCF1
ENSG00000169427.8	10.5354	1.63034	1.22653	1.32922	0.183774	0.999937	ENSG00000169427	KCNK9
ENSG00000268750.7	10.5394	-2.44538	1.32873	-1.84039	0.0657105	0.999937	ENSG00000268750	AC010522.1
ENSG00000205639.12	10.5435	0.0181599	1.2051	0.0150692	0.987977	0.999937	ENSG00000205639	MFSD2B
ENSG00000260798.1	10.5477	-0.828519	1.18859	-0.697059	0.485766	0.999937	ENSG00000260798	AC099314.1
ENSG00000239218.2	10.5491	0.669154	1.19335	0.560734	0.574979	0.999937	ENSG00000239218	RPS20P22
ENSG00000253227.2	10.5496	-0.355954	1.33382	-0.266868	0.789571	0.999937	ENSG00000253227	AC090192.2
ENSG00000213073.4	10.5514	-0.316225	1.18091	-0.267781	0.788868	0.999937	ENSG00000213073	AL353625.1
ENSG00000142621.19	10.5578	1.19075	1.23699	0.962621	0.335738	0.999937	ENSG00000142621	FHAD1
ENSG00000226620.8	10.5589	1.24049	1.49306	0.830841	0.406064	0.999937	ENSG00000226620	LINC00343
ENSG00000186431.19	10.5603	-0.163482	1.62261	-0.100752	0.919747	0.999937	ENSG00000186431	FCAR
ENSG00000234807.7	10.5675	1.10198	1.15572	0.953505	0.340334	0.999937	ENSG00000234807	LINC01135
ENSG00000273466.1	10.5696	-0.0470374	1.18934	-0.0395492	0.968453	0.999937	ENSG00000273466	AC012510.1
ENSG00000280069.1	10.5714	1.10206	1.24092	0.888093	0.374491	0.999937	ENSG00000280069	AC127024.8
ENSG00000251393.4	10.583	0.0857023	1.27252	0.0673485	0.946304	0.999937	ENSG00000251393	AC005280.1
ENSG00000177133.11	10.5851	0.75223	1.26031	0.596863	0.550599	0.999937	ENSG00000177133	PRDM16-DT
ENSG00000128815.19	10.5862	1.83475	1.69539	1.0822	0.279165	0.999937	ENSG00000128815	WDFY4
ENSG00000139985.7	10.5891	-0.0460021	1.16298	-0.0395553	0.968448	0.999937	ENSG00000139985	ADAM21
ENSG00000232586.1	10.5952	-0.457871	1.1776	-0.388818	0.697411	0.999937	ENSG00000232586	KIAA1614-AS1
ENSG00000269983.1	10.5968	0.821294	1.2907	0.636315	0.524571	0.999937	ENSG00000269983	AC146944.3
ENSG00000162669.16	10.5988	-0.104969	1.22076	-0.0859869	0.931477	0.999937	ENSG00000162669	HFM1
ENSG00000276832.2	10.6006	1.62512	1.23325	1.31776	0.187585	0.999937	ENSG00000276832	AL354718.3
ENSG00000214401.4	10.6024	0.632653	1.20934	0.52314	0.600877	0.999937	ENSG00000214401	KANSL1-AS1
ENSG00000259456.4	10.6055	-0.832419	1.24765	-0.667187	0.504653	0.999937	ENSG00000259456	ADNP-AS1
ENSG00000236423.6	10.6092	0.769841	1.2591	0.611422	0.54092	0.999937	ENSG00000236423	LINC01134
ENSG00000225224.1	10.6095	-0.0806687	1.18418	-0.0681222	0.945688	0.999937	ENSG00000225224	RPS27AP12
ENSG00000106327.13	10.6114	-0.214715	1.1776	-0.182332	0.855322	0.999937	ENSG00000106327	TFR2
ENSG00000276449.1	10.6162	0.163206	1.14684	0.142309	0.886836	0.999937	ENSG00000276449	AC004076.2
ENSG00000228623.6	10.6211	-0.164642	1.1676	-0.141009	0.887863	0.999937	ENSG00000228623	ZNF883
ENSG00000285244.1	10.6213	-0.493554	1.34119	-0.367998	0.712875	0.999937	ENSG00000285244	DINOL
ENSG00000237352.4	10.6242	0.583997	1.33713	0.436756	0.662288	0.999937	ENSG00000237352	LINC01358
ENSG00000137875.4	10.6251	-0.442525	1.15923	-0.381739	0.702655	0.999937	ENSG00000137875	BCL2L10
ENSG00000267260.2	10.6269	1.34437	1.15237	1.16661	0.243368	0.999937	ENSG00000267260	AC020928.1
ENSG00000181378.14	10.6368	1.92362	1.29025	1.49089	0.13599	0.999937	ENSG00000181378	CFAP65
ENSG00000278867.1	10.642	-0.0867796	1.24582	-0.0696566	0.944467	0.999937	ENSG00000278867	AC090616.6
ENSG00000174059.17	10.6425	1.08845	1.17099	0.929519	0.35262	0.999937	ENSG00000174059	CD34
ENSG00000171462.15	10.6431	0.0936889	1.17371	0.0798228	0.936378	0.999937	ENSG00000171462	DLK2
ENSG00000242288.9	10.6437	-0.951646	3.9533	-0.240722	0.809771	0.999937	ENSG00000242288	BMS1P4-AGAP5
ENSG00000157927.17	10.6448	1.36019	1.50057	0.90645	0.364698	0.999937	ENSG00000157927	RADIL
ENSG00000186818.12	10.6539	2.05173	1.48344	1.38309	0.166637	0.999937	ENSG00000186818	LILRB4
ENSG00000089169.15	10.6579	0.902676	1.40715	0.641491	0.521204	0.999937	ENSG00000089169	RPH3A
ENSG00000259738.1	10.6589	0.310384	1.13837	0.272656	0.785117	0.999937	ENSG00000259738	ZNF444P1
ENSG00000269896.2	10.6698	-0.175717	1.2534	-0.140192	0.888508	0.999937	ENSG00000269896	AL513477.1
ENSG00000205740.2	10.6737	0.807134	1.24247	0.649622	0.515937	0.999937	ENSG00000205740	AL359878.1
ENSG00000226816.3	10.676	0.737028	1.28982	0.571421	0.567715	0.999937	ENSG00000226816	AC005082.1
ENSG00000280356.1	10.6813	4.8935	1.66875	2.93244	0.00336315	0.999937	ENSG00000280356	AL021877.2
ENSG00000183458.14	10.6821	0.805061	1.5199	0.529679	0.596334	0.999937	ENSG00000183458	AC138932.1
ENSG00000229214.2	10.6821	0.321645	1.14206	0.281637	0.778222	0.999937	ENSG00000229214	LINC00242
ENSG00000286485.1	10.6916	-0.1004	1.13572	-0.0884025	0.929557	0.999937	ENSG00000286485	Z80897.1
ENSG00000260604.2	10.6963	1.74033	1.18026	1.47454	0.140337	0.999937	ENSG00000260604	AL590004.3
ENSG00000240405.7	10.6977	3.23994	1.4662	2.20976	0.027122	0.999937	ENSG00000240405	SAMMSON
ENSG00000138615.6	10.7	-0.600181	1.22075	-0.491649	0.622967	0.999937	ENSG00000138615	CILP
ENSG00000142544.7	10.7013	1.3793	1.27539	1.08147	0.279488	0.999937	ENSG00000142544	CTU1
ENSG00000255153.1	10.7026	0.805853	1.20459	0.668983	0.503506	0.999937	ENSG00000255153	TOLLIP-AS1
ENSG00000256663.1	10.703	1.18908	1.356	0.876904	0.380539	0.999937	ENSG00000256663	AC112777.1
ENSG00000254221.2	10.7142	0.675243	1.27254	0.530624	0.595679	0.999937	ENSG00000254221	PCDHGB1
ENSG00000250899.3	10.7155	0.35459	1.13772	0.311667	0.755294	0.999937	ENSG00000250899	AC125807.2
ENSG00000269559.2	10.7238	0.765754	1.15238	0.664496	0.506373	0.999937	ENSG00000269559	AC093677.2
ENSG00000261490.1	10.724	0.00785632	1.15112	0.00682496	0.994555	0.999937	ENSG00000261490	AC005674.2
ENSG00000255046.1	10.7257	0.0788376	1.34209	0.0587426	0.953157	0.999937	ENSG00000255046	AC069185.1
ENSG00000173269.14	10.7302	1.78659	1.43747	1.24287	0.213914	0.999937	ENSG00000173269	MMRN2
ENSG00000268416.1	10.7303	2.38816	1.44852	1.64869	0.0992103	0.999937	ENSG00000268416	AC010329.1
ENSG00000262712.1	10.7313	1.00612	1.18167	0.851442	0.394524	0.999937	ENSG00000262712	AC012676.1
ENSG00000161914.10	10.732	1.7762	1.26391	1.40531	0.159928	0.999937	ENSG00000161914	ZNF653
ENSG00000255624.3	10.7353	-0.364675	1.14588	-0.318249	0.750296	0.999937	ENSG00000255624	C10orf88B
ENSG00000037280.16	10.736	0.612149	1.4234	0.43006	0.667152	0.999937	ENSG00000037280	FLT4
ENSG00000273007.2	10.7365	-0.712688	1.2058	-0.591051	0.554486	0.999937	ENSG00000273007	AC021205.3
ENSG00000248980.1	10.7373	0.188109	1.1974	0.157098	0.875168	0.999937	ENSG00000248980	SPCS3-AS1
ENSG00000121797.10	10.7437	-0.0914341	1.13774	-0.080365	0.935947	0.999937	ENSG00000121797	CCRL2
ENSG00000169026.13	10.7463	1.39568	1.15885	1.20437	0.228448	0.999937	ENSG00000169026	SLC49A3
ENSG00000279628.1	10.7469	2.03486	1.54454	1.31745	0.187686	0.999937	ENSG00000279628	AC131280.1
ENSG00000264666.1	10.7471	-0.512986	1.17215	-0.437644	0.661644	0.999937	ENSG00000264666	AC020558.1
ENSG00000278616.1	10.7486	-0.264441	1.21544	-0.217569	0.827765	0.999937	ENSG00000278616	BEND3P3
ENSG00000225511.7	10.7529	-0.269563	1.1596	-0.232461	0.81618	0.999937	ENSG00000225511	LINC00475
ENSG00000178809.11	10.7572	0.994901	1.18954	0.836373	0.402945	0.999937	ENSG00000178809	TRIM73
ENSG00000256671.6	10.7579	0.12065	1.34351	0.0898026	0.928444	0.999937	ENSG00000256671	LIMS4
ENSG00000261465.7	10.7588	1.01307	1.23487	0.820385	0.411997	0.999937	ENSG00000261465	AC099518.4
ENSG00000255585.3	10.7613	1.10637	1.23153	0.898371	0.368988	0.999937	ENSG00000255585	AL590627.1
ENSG00000283809.1	10.7616	-4.11055	1.58579	-2.59212	0.0095386	0.999937	ENSG00000283809	AC007326.4
ENSG00000285108.1	10.7621	2.8039	1.34164	2.0899	0.0366268	0.999937	ENSG00000285108	AC103718.1
ENSG00000278000.1	10.7654	3.90806	1.51842	2.57377	0.0100598	0.999937	ENSG00000278000	AC139100.2
ENSG00000215374.6	10.7664	0.105688	1.12821	0.0936778	0.925365	0.999937	ENSG00000215374	FAM66B
ENSG00000284634.1	10.7718	-1.72879	1.38178	-1.25113	0.210887	0.999937	ENSG00000284634	AC092821.3
ENSG00000198400.12	10.7765	-0.41042	1.23468	-0.332411	0.739579	0.999937	ENSG00000198400	NTRK1
ENSG00000260281.6	10.7778	-0.846811	1.16362	-0.727741	0.466772	0.999937	ENSG00000260281	ITFG1-AS1
ENSG00000272004.1	10.7855	0.254195	1.1357	0.223823	0.822895	0.999937	ENSG00000272004	FO704657.1
ENSG00000147234.10	10.7859	-0.33017	1.17708	-0.2805	0.779094	0.999937	ENSG00000147234	FRMPD3
ENSG00000171823.7	10.7864	1.74007	1.18245	1.47158	0.141134	0.999937	ENSG00000171823	FBXL14
ENSG00000176222.9	10.7871	-0.601608	1.16779	-0.515167	0.606436	0.999937	ENSG00000176222	ZNF404
ENSG00000103710.11	10.7904	1.67254	1.2732	1.31365	0.188965	0.999937	ENSG00000103710	RASL12
ENSG00000197653.16	10.7938	1.37103	1.21866	1.12503	0.260575	0.999937	ENSG00000197653	DNAH10
ENSG00000231304.2	10.7983	0.476405	1.14201	0.417164	0.676559	0.999937	ENSG00000231304	SGO1-AS1
ENSG00000286013.1	10.7986	0.110613	1.18323	0.0934842	0.925519	0.999937	ENSG00000286013	AC005050.2
ENSG00000235121.1	10.8009	0.165318	1.16588	0.141796	0.887241	0.999937	ENSG00000235121	AL645504.1
ENSG00000230461.9	10.8064	0.161463	1.38613	0.116485	0.907269	0.999937	ENSG00000230461	PROX1-AS1
ENSG00000255201.1	10.8076	-1.0378	1.3232	-0.784312	0.432857	0.999937	ENSG00000255201	AC087623.1
ENSG00000279443.1	10.8119	0.292025	1.17533	0.248462	0.803777	0.999937	ENSG00000279443	AL513497.1
ENSG00000258991.1	10.8151	2.27329	1.54406	1.47227	0.140947	0.999937	ENSG00000258991	DUX4L19
ENSG00000276791.1	10.818	-0.470659	1.22733	-0.383483	0.701361	0.999937	ENSG00000276791	AC092117.1
ENSG00000253741.2	10.819	1.37558	1.18915	1.15677	0.247366	0.999937	ENSG00000253741	LNCOC1
ENSG00000285676.1	10.8204	0.589285	1.17027	0.503545	0.614581	0.999937	ENSG00000285676	AL158212.5
ENSG00000265168.1	10.8234	0.782403	1.15631	0.676637	0.498636	0.999937	ENSG00000265168	AC005726.3
ENSG00000246090.7	10.8243	0.0969003	1.16354	0.0832804	0.933629	0.999937	ENSG00000246090	AP002026.1
ENSG00000111886.11	10.8249	1.01815	1.31232	0.775844	0.437841	0.999937	ENSG00000111886	GABRR2
ENSG00000231327.1	10.8256	0.105591	1.15197	0.0916613	0.926967	0.999937	ENSG00000231327	LINC01816
ENSG00000188338.15	10.8318	-1.07767	1.26772	-0.850084	0.395279	0.999937	ENSG00000188338	SLC38A3
ENSG00000277758.5	10.8346	0.500037	1.44119	0.34696	0.728621	0.999937	ENSG00000277758	FO681492.1
ENSG00000245888.7	10.8364	0.215606	1.24825	0.172727	0.862866	0.999937	ENSG00000245888	NSMCE1-DT
ENSG00000121005.9	10.8413	1.29261	1.263	1.02344	0.306098	0.999937	ENSG00000121005	CRISPLD1
ENSG00000215912.12	10.8432	1.47842	1.18517	1.24744	0.212237	0.999937	ENSG00000215912	TTC34
ENSG00000165511.6	10.8432	0.595696	1.15668	0.515005	0.606549	0.999937	ENSG00000165511	ZNF22-AS1
ENSG00000279838.1	10.8459	-0.607467	1.13454	-0.535428	0.592354	0.999937	ENSG00000279838	AL356273.3
ENSG00000283486.2	10.8462	0.763898	1.17803	0.648453	0.516692	0.999937	ENSG00000283486	FAM95C
ENSG00000287306.1	10.8475	1.134	1.21789	0.931119	0.351792	0.999937	ENSG00000287306	AC016821.1
ENSG00000260219.2	10.8501	0.702869	1.13353	0.620074	0.535209	0.999937	ENSG00000260219	CD2BP2-DT
ENSG00000255062.1	10.8507	-1.00057	1.17513	-0.851456	0.394516	0.999937	ENSG00000255062	AP001318.2
ENSG00000267632.1	10.8519	0.785744	1.16577	0.674014	0.500303	0.999937	ENSG00000267632	AC067852.3
ENSG00000113555.6	10.8524	0.731927	1.26889	0.576823	0.564059	0.999937	ENSG00000113555	PCDH12
ENSG00000174640.15	10.856	0.775907	1.13724	0.68227	0.495068	0.999937	ENSG00000174640	SLCO2A1
ENSG00000166501.14	10.8584	0.292135	1.45039	0.201418	0.840372	0.999937	ENSG00000166501	PRKCB
ENSG00000229719.5	10.8611	1.21445	1.1498	1.05623	0.290865	0.999937	ENSG00000229719	MIR194-2HG
ENSG00000214212.9	10.8642	-1.03468	1.20203	-0.860779	0.38936	0.999937	ENSG00000214212	C19orf38
ENSG00000198838.14	10.8646	0.0430907	1.1982	0.0359629	0.971312	0.999937	ENSG00000198838	RYR3
ENSG00000183773.15	10.8651	1.13591	1.16895	0.971739	0.33118	0.999937	ENSG00000183773	AIFM3
ENSG00000258701.1	10.8731	1.03779	1.1972	0.86685	0.386024	0.999937	ENSG00000258701	LINC00638
ENSG00000267213.4	10.8883	-0.552362	1.1941	-0.462575	0.643669	0.999937	ENSG00000267213	AC007773.1
ENSG00000100060.18	10.8915	-0.120677	1.15201	-0.104753	0.916572	0.999937	ENSG00000100060	MFNG
ENSG00000130561.17	10.8918	0.904316	1.67924	0.538526	0.590214	0.999937	ENSG00000130561	SAG
ENSG00000244968.7	10.9027	0.0943998	1.31136	0.0719861	0.942613	0.999937	ENSG00000244968	LIFR-AS1
ENSG00000165879.9	10.9044	1.93475	1.17912	1.64085	0.100829	0.999937	ENSG00000165879	FRAT1
ENSG00000142609.18	10.9068	2.55178	1.63343	1.56222	0.118236	0.999937	ENSG00000142609	CFAP74
ENSG00000286790.1	10.9112	-0.290319	1.15563	-0.251221	0.801644	0.999937	ENSG00000286790	AC010494.1
ENSG00000188167.9	10.9158	0.0179475	1.15126	0.0155894	0.987562	0.999937	ENSG00000188167	TMPPE
ENSG00000226476.6	10.9162	3.26715	1.42153	2.29833	0.021543	0.999937	ENSG00000226476	LINC01748
ENSG00000171815.6	10.9201	1.86509	1.29031	1.44546	0.148329	0.999937	ENSG00000171815	PCDHB1
ENSG00000183307.4	10.9233	0.118939	1.20805	0.0984551	0.921571	0.999937	ENSG00000183307	TMEM121B
ENSG00000164406.8	10.9312	0.0898578	1.13934	0.0788682	0.937137	0.999937	ENSG00000164406	LEAP2
ENSG00000260963.2	10.9329	-0.123002	1.23331	-0.0997334	0.920556	0.999937	ENSG00000260963	AC026462.3
ENSG00000247381.3	10.9358	-0.00959107	1.13566	-0.00844535	0.993262	0.999937	ENSG00000247381	PLUT
ENSG00000134242.16	10.9391	1.25615	1.37325	0.914731	0.360333	0.999937	ENSG00000134242	PTPN22
ENSG00000164841.5	10.94	1.58244	1.23993	1.27623	0.201874	0.999937	ENSG00000164841	TMEM74
ENSG00000279865.1	10.9412	0.380346	1.13194	0.336011	0.736862	0.999937	ENSG00000279865	AC006511.3
ENSG00000138964.17	10.9416	2.35914	1.33711	1.76435	0.0776724	0.999937	ENSG00000138964	PARVG
ENSG00000123338.13	10.9457	0.796244	1.30183	0.611636	0.540779	0.999937	ENSG00000123338	NCKAP1L
ENSG00000178201.4	10.9468	1.43969	1.15841	1.24282	0.213936	0.999937	ENSG00000178201	VN1R1
ENSG00000138741.11	10.9535	1.50271	1.29811	1.15762	0.24702	0.999937	ENSG00000138741	TRPC3
ENSG00000174611.12	10.9548	2.24201	1.43892	1.55812	0.119204	0.999937	ENSG00000174611	KY
ENSG00000182890.5	10.957	-0.89363	1.36476	-0.654791	0.512602	0.999937	ENSG00000182890	GLUD2
ENSG00000260910.2	10.9572	0.404451	1.26327	0.320161	0.748846	0.999937	ENSG00000260910	LINC00565
ENSG00000228767.1	10.9694	1.42945	1.42888	1.0004	0.317119	0.999937	ENSG00000228767	KRT8P18
ENSG00000228793.2	10.9711	1.97782	1.35064	1.46436	0.143095	0.999937	ENSG00000228793	AL033523.1
ENSG00000230882.1	10.9712	1.82778	1.19849	1.52507	0.127242	0.999937	ENSG00000230882	AC005077.4
ENSG00000256315.1	10.9756	-0.143724	1.13986	-0.126089	0.899661	0.999937	ENSG00000256315	AP000462.2
ENSG00000224376.1	10.9791	-0.113856	1.20799	-0.0942529	0.924908	0.999937	ENSG00000224376	AC017104.1
ENSG00000177238.14	10.9798	3.2291	1.4603	2.21126	0.027018	0.999937	ENSG00000177238	TRIM72
ENSG00000180447.7	10.9818	0.61145	1.14754	0.532834	0.594149	0.999937	ENSG00000180447	GAS1
ENSG00000278599.5	10.9846	0.312519	3.95372	0.0790442	0.936997	0.999937	ENSG00000278599	TBC1D3E
ENSG00000279344.1	10.9881	0.0155866	1.17471	0.0132684	0.989414	0.999937	ENSG00000279344	AC007342.6
ENSG00000286044.1	10.9889	1.586	1.22666	1.29294	0.196031	0.999937	ENSG00000286044	AP001977.1
ENSG00000177076.6	10.9916	-0.478993	1.20386	-0.397883	0.690717	0.999937	ENSG00000177076	ACER2
ENSG00000223855.2	10.992	-0.111208	1.13075	-0.0983489	0.921655	0.999937	ENSG00000223855	HRAT92
ENSG00000287435.1	10.9926	0.644692	1.23149	0.523505	0.600623	0.999937	ENSG00000287435	AC069404.1
ENSG00000173825.7	10.9932	-0.442359	1.15988	-0.381384	0.702918	0.999937	ENSG00000173825	TIGD3
ENSG00000112137.18	10.9957	0.629373	1.1683	0.538711	0.590086	0.999937	ENSG00000112137	PHACTR1
ENSG00000020633.19	10.9976	0.721224	1.1875	0.607348	0.54362	0.999937	ENSG00000020633	RUNX3
ENSG00000260339.1	10.999	0.155785	1.12901	0.137984	0.890253	0.999937	ENSG00000260339	HEXA-AS1
ENSG00000179256.2	10.9991	2.76725	1.41243	1.9592	0.0500889	0.999937	ENSG00000179256	SMCO3
ENSG00000197816.16	11.0001	-0.349428	1.24428	-0.280827	0.778843	0.999937	ENSG00000197816	CCDC180
ENSG00000261519.3	11.0065	2.98444	1.39253	2.14318	0.0320987	0.999937	ENSG00000261519	AC010542.4
ENSG00000229056.2	11.0105	-0.18641	1.1601	-0.160684	0.872342	0.999937	ENSG00000229056	HECW2-AS1
ENSG00000288187.1	11.0144	1.33222	1.22087	1.09121	0.275182	0.999937	ENSG00000288187	CU633906.5
ENSG00000279518.1	11.0147	0.32495	1.12544	0.288732	0.772786	0.999937	ENSG00000279518	AC083843.3
ENSG00000182902.14	11.0149	1.39851	1.31496	1.06354	0.287538	0.999937	ENSG00000182902	SLC25A18
ENSG00000259647.1	11.0176	-0.345265	1.25451	-0.275218	0.783148	0.999937	ENSG00000259647	AC111152.2
ENSG00000264070.1	11.0187	0.213554	1.12861	0.189218	0.849922	0.999937	ENSG00000264070	DND1P1
ENSG00000165309.14	11.0271	3.94156	1.35591	2.90695	0.00364972	0.999937	ENSG00000165309	ARMC3
ENSG00000280162.1	11.0328	1.45398	1.25591	1.15771	0.246981	0.999937	ENSG00000280162	AL136531.3
ENSG00000141293.16	11.0337	0.320739	1.1395	0.281474	0.778347	0.999937	ENSG00000141293	SKAP1
ENSG00000286864.1	11.0364	-0.608676	1.12638	-0.540382	0.588934	0.999937	ENSG00000286864	AC012076.1
ENSG00000197915.7	11.0411	1.16486	1.31387	0.886585	0.375302	0.999937	ENSG00000197915	HRNR
ENSG00000131480.9	11.0466	0.0749492	1.13423	0.0660792	0.947315	0.999937	ENSG00000131480	AOC2
ENSG00000104808.8	11.0509	-0.233007	1.16136	-0.200633	0.840985	0.999937	ENSG00000104808	DHDH
ENSG00000165186.12	11.0536	-0.303339	1.23837	-0.24495	0.806495	0.999937	ENSG00000165186	PTCHD1
ENSG00000276248.1	11.0552	1.47312	1.1726	1.25628	0.209013	0.999937	ENSG00000276248	AL442125.1
ENSG00000188316.15	11.0602	0.812078	1.16194	0.698896	0.484617	0.999937	ENSG00000188316	ENO4
ENSG00000259664.3	11.062	1.66264	1.31112	1.2681	0.204762	0.999937	ENSG00000259664	LINC02254
ENSG00000115474.7	11.0624	0.147931	1.19968	0.123309	0.901862	0.999937	ENSG00000115474	KCNJ13
ENSG00000265194.1	11.0643	-0.6008	1.16077	-0.517589	0.604745	0.999937	ENSG00000265194	AL359922.2
ENSG00000267270.6	11.0645	0.756883	1.13324	0.667896	0.5042	0.999937	ENSG00000267270	PARD6G-AS1
ENSG00000241962.9	11.0658	-0.31267	1.14396	-0.273324	0.784604	0.999937	ENSG00000241962	AC079447.1
ENSG00000286964.1	11.0681	0.615674	1.16067	0.530445	0.595803	0.999937	ENSG00000286964	AL136169.1
ENSG00000196453.8	11.0749	0.86292	1.18558	0.727845	0.466709	0.999937	ENSG00000196453	ZNF777
ENSG00000272977.1	11.0775	0.529239	1.25514	0.421659	0.673274	0.999937	ENSG00000272977	AL008721.2
ENSG00000257732.1	11.0819	0.656225	1.19595	0.548706	0.583207	0.999937	ENSG00000257732	AC089983.1
ENSG00000258130.8	11.0821	2.7368	1.2553	2.1802	0.0292425	0.999937	ENSG00000258130	AC106782.1
ENSG00000196660.11	11.0824	1.78928	1.25336	1.42759	0.15341	0.999937	ENSG00000196660	SLC30A10
ENSG00000162367.11	11.0864	3.06168	1.31863	2.32186	0.0202404	0.999937	ENSG00000162367	TAL1
ENSG00000257921.6	11.0882	-1.18259	1.37612	-0.859363	0.39014	0.999937	ENSG00000257921	AC025165.3
ENSG00000162951.11	11.0891	0.59935	1.25781	0.476501	0.633717	0.999937	ENSG00000162951	LRRTM1
ENSG00000164379.7	11.0941	1.31732	1.1678	1.12803	0.259306	0.999937	ENSG00000164379	FOXQ1
ENSG00000179841.8	11.0947	-0.0755331	1.24313	-0.0607606	0.95155	0.999937	ENSG00000179841	AKAP5
ENSG00000278385.1	11.0951	0.0171913	1.13756	0.0151124	0.987942	0.999937	ENSG00000278385	AC121338.2
ENSG00000224645.1	11.0952	0.323188	1.11454	0.289974	0.771836	0.999937	ENSG00000224645	AL391069.1
ENSG00000267107.8	11.0976	2.0167	1.17553	1.71557	0.0862404	0.999937	ENSG00000267107	PCAT19
ENSG00000184788.14	11.0979	0.0989336	1.12593	0.0878686	0.929981	0.999937	ENSG00000184788	SATL1
ENSG00000134376.16	11.1062	0.883705	1.16178	0.760649	0.446867	0.999937	ENSG00000134376	CRB1
ENSG00000226849.1	11.1064	0.0860483	1.17313	0.073349	0.941528	0.999937	ENSG00000226849	AL109811.1
ENSG00000137877.10	11.108	0.897733	1.1489	0.781383	0.434577	0.999937	ENSG00000137877	SPTBN5
ENSG00000270392.2	11.1117	1.19335	1.20679	0.98886	0.322732	0.999937	ENSG00000270392	PFN1P2
ENSG00000273906.1	11.1175	-0.0946848	1.20994	-0.078256	0.937624	0.999937	ENSG00000273906	AC011297.1
ENSG00000066813.14	11.1208	3.14995	1.62499	1.93844	0.052569	0.999937	ENSG00000066813	ACSM2B
ENSG00000266053.2	11.1213	-0.164114	1.19868	-0.136912	0.8911	0.999937	ENSG00000266053	NDUFV2-AS1
ENSG00000261116.1	11.1273	4.74959	1.57129	3.02274	0.00250494	0.999937	ENSG00000261116	AL049555.1
ENSG00000259826.1	11.1358	1.07161	1.21367	0.882949	0.377264	0.999937	ENSG00000259826	AC072061.1
ENSG00000238221.1	11.136	-0.109418	1.20186	-0.0910405	0.92746	0.999937	ENSG00000238221	AL139095.4
ENSG00000079435.10	11.1379	0.0954529	1.24888	0.0764311	0.939076	0.999937	ENSG00000079435	LIPE
ENSG00000215182.8	11.1402	4.39245	1.66914	2.63157	0.00849917	0.999937	ENSG00000215182	MUC5AC
ENSG00000121089.4	11.144	-0.619826	1.17417	-0.527883	0.597581	0.999937	ENSG00000121089	NACA3P
ENSG00000271553.1	11.1506	-0.765289	1.13481	-0.674378	0.500071	0.999937	ENSG00000271553	AC018638.7
ENSG00000254254.6	11.1559	1.65515	1.47544	1.1218	0.261946	0.999937	ENSG00000254254	AC012349.1
ENSG00000142748.13	11.1573	0.352009	1.27322	0.276471	0.782186	0.999937	ENSG00000142748	FCN3
ENSG00000225840.2	11.1597	2.26749	1.47441	1.53789	0.124075	0.999937	ENSG00000225840	AC010970.1
ENSG00000262112.1	11.1609	-0.288815	1.14144	-0.253027	0.800247	0.999937	ENSG00000262112	AC015912.1
ENSG00000066248.15	11.1647	0.801813	1.24001	0.64662	0.517878	0.999937	ENSG00000066248	NGEF
ENSG00000286627.1	11.1652	0.17534	1.18786	0.147609	0.882651	0.999937	ENSG00000286627	AP005900.1
ENSG00000251600.8	11.1684	-0.509311	1.14964	-0.443019	0.657752	0.999937	ENSG00000251600	AC107223.1
ENSG00000284977.2	11.1708	0.224036	1.43527	0.156093	0.87596	0.999937	ENSG00000284977	AL160272.1
ENSG00000286863.1	11.1733	1.37254	1.18855	1.1548	0.248172	0.999937	ENSG00000286863	AL513166.1
ENSG00000161328.11	11.1804	0.708468	1.12536	0.629548	0.528991	0.999937	ENSG00000161328	LRRC56
ENSG00000272219.1	11.1818	-0.0165901	1.13159	-0.0146608	0.988303	0.999937	ENSG00000272219	AC005072.1
ENSG00000222036.8	11.182	4.87499	1.66978	2.91953	0.00350554	0.999937	ENSG00000222036	POTEM
ENSG00000189058.9	11.1834	0.317144	1.14037	0.278105	0.780931	0.999937	ENSG00000189058	APOD
ENSG00000285825.2	11.1839	1.43685	1.21258	1.18495	0.236038	0.999937	ENSG00000285825	CCDC15-DT
ENSG00000235711.4	11.1863	0.5131	1.17031	0.438432	0.661073	0.999937	ENSG00000235711	ANKRD34C
ENSG00000286679.1	11.1951	1.06632	1.36898	0.778912	0.436031	0.999937	ENSG00000286679	AC073225.1
ENSG00000283703.2	11.1972	0.316047	1.17655	0.268623	0.78822	0.999937	ENSG00000283703	VSIG10L2
ENSG00000197935.6	11.1982	1.34556	1.17681	1.1434	0.252872	0.999937	ENSG00000197935	ZNF311
ENSG00000174453.10	11.1992	0.798411	1.27907	0.624212	0.532488	0.999937	ENSG00000174453	VWC2L
ENSG00000115257.15	11.2054	1.0721	1.21115	0.885194	0.376052	0.999937	ENSG00000115257	PCSK4
ENSG00000267871.6	11.2057	-0.0214538	1.15475	-0.0185787	0.985177	0.999937	ENSG00000267871	ZNF460-AS1
ENSG00000173421.17	11.2069	1.51039	1.26697	1.19212	0.233212	0.999937	ENSG00000173421	IHO1
ENSG00000285737.1	11.2069	0.540429	1.26724	0.426463	0.669771	0.999937	ENSG00000285737	LINC02680
ENSG00000197472.15	11.2108	-0.183485	1.16485	-0.157518	0.874837	0.999937	ENSG00000197472	ZNF695
ENSG00000273576.1	11.2174	-0.655689	1.1285	-0.581028	0.561221	0.999937	ENSG00000273576	AC009283.1
ENSG00000250474.2	11.2182	-0.661795	1.17666	-0.562436	0.573819	0.999937	ENSG00000250474	WBP1LP2
ENSG00000198156.10	11.2265	3.46393	1.49714	2.3137	0.0206843	0.999937	ENSG00000198156	NPIPB6
ENSG00000137218.10	11.2268	0.514202	1.12088	0.458747	0.646416	0.999937	ENSG00000137218	FRS3
ENSG00000260103.2	11.2282	1.94633	1.31926	1.47532	0.140126	0.999937	ENSG00000260103	AC012435.2
ENSG00000205089.8	11.2289	0.58177	1.13937	0.510606	0.609627	0.999937	ENSG00000205089	CCNI2
ENSG00000274317.2	11.2369	1.30164	1.1359	1.14591	0.251832	0.999937	ENSG00000274317	LINC02334
ENSG00000271009.3	11.2371	0.756468	1.17816	0.642076	0.520824	0.999937	ENSG00000271009	AC116667.1
ENSG00000257511.1	11.2428	0.436817	1.11693	0.391088	0.695732	0.999937	ENSG00000257511	AC084824.1
ENSG00000240053.8	11.2442	1.39795	1.19368	1.17112	0.241549	0.999937	ENSG00000240053	LY6G5B
ENSG00000272092.1	11.2494	0.479427	1.11496	0.429993	0.667201	0.999937	ENSG00000272092	AC087623.2
ENSG00000241684.6	11.2514	0.728863	1.13779	0.640594	0.521786	0.999937	ENSG00000241684	ADAMTS9-AS2
ENSG00000137270.11	11.2538	-0.730117	1.28884	-0.566494	0.571058	0.999937	ENSG00000137270	GCM1
ENSG00000260018.1	11.2546	0.973462	1.14854	0.847566	0.39668	0.999937	ENSG00000260018	AC040169.1
ENSG00000203647.2	11.2568	-1.50154	1.20601	-1.24505	0.213113	0.999937	ENSG00000203647	AC106827.1
ENSG00000273356.1	11.2592	-0.175602	1.15863	-0.15156	0.879534	0.999937	ENSG00000273356	LINC02019
ENSG00000230319.1	11.2613	0.263668	1.13568	0.232167	0.816408	0.999937	ENSG00000230319	AL022476.1
ENSG00000226029.1	11.2615	0.294544	1.12646	0.261478	0.793724	0.999937	ENSG00000226029	LINC01772
ENSG00000133863.9	11.2642	3.63124	1.39612	2.60094	0.00929679	0.999937	ENSG00000133863	TEX15
ENSG00000116652.6	11.2648	1.04146	1.13994	0.913609	0.360922	0.999937	ENSG00000116652	DLEU2L
ENSG00000174500.13	11.2663	-0.866583	1.11217	-0.779184	0.435871	0.999937	ENSG00000174500	GCSAM
ENSG00000197815.4	11.2668	0.752018	1.1597	0.64846	0.516687	0.999937	ENSG00000197815	AC122129.1
ENSG00000271971.1	11.2677	-0.300212	1.22231	-0.24561	0.805984	0.999937	ENSG00000271971	AC120053.1
ENSG00000285813.1	11.269	-0.40938	1.13475	-0.360767	0.718274	0.999937	ENSG00000285813	AP000813.1
ENSG00000272142.4	11.2695	-0.558283	1.17354	-0.475725	0.63427	0.999937	ENSG00000272142	LYRM4-AS1
ENSG00000108381.11	11.2761	-0.701915	1.17589	-0.596923	0.550559	0.999937	ENSG00000108381	ASPA
ENSG00000204444.11	11.2815	0.0330945	1.11243	0.0297498	0.976267	0.999937	ENSG00000204444	APOM
ENSG00000186479.5	11.2836	-0.377883	1.19216	-0.316974	0.751263	0.999937	ENSG00000186479	RGS7BP
ENSG00000230092.7	11.2854	0.682025	1.1396	0.598478	0.549521	0.999937	ENSG00000230092	AL669831.4
ENSG00000258677.2	11.2892	-2.70966	1.43145	-1.89294	0.0583653	0.999937	ENSG00000258677	AC022826.2
ENSG00000261455.1	11.299	1.11208	1.15482	0.962991	0.335552	0.999937	ENSG00000261455	LINC01003
ENSG00000268869.6	11.3045	0.0106702	3.73461	0.00285711	0.99772	0.999937	ENSG00000268869	ESPNP
ENSG00000106714.17	11.3049	1.73294	1.19744	1.4472	0.14784	0.999937	ENSG00000106714	CNTNAP3
ENSG00000141505.12	11.3053	0.758829	1.27053	0.597252	0.550339	0.999937	ENSG00000141505	ASGR1
ENSG00000178665.16	11.3088	0.606714	1.16675	0.520005	0.60306	0.999937	ENSG00000178665	ZNF713
ENSG00000197140.15	11.3121	1.27391	1.21328	1.04997	0.293732	0.999937	ENSG00000197140	ADAM32
ENSG00000277150.2	11.3184	0.195255	1.36941	0.142584	0.886619	0.999937	ENSG00000277150	F8A3
ENSG00000235961.6	11.3199	1.08042	1.15967	0.931661	0.351512	0.999937	ENSG00000235961	PNMA6A
ENSG00000283646.2	11.3257	1.86891	1.39356	1.34111	0.179886	0.999937	ENSG00000283646	LINC02009
ENSG00000160117.16	11.3299	0.148996	1.23562	0.120585	0.90402	0.999937	ENSG00000160117	ANKLE1
ENSG00000176428.6	11.3299	1.71185	1.3388	1.27864	0.201023	0.999937	ENSG00000176428	VPS37D
ENSG00000254859.1	11.3373	3.45598	1.39387	2.47942	0.0131595	0.999937	ENSG00000254859	AC067930.3
ENSG00000269964.3	11.3443	-0.437017	1.19918	-0.364429	0.715538	0.999937	ENSG00000269964	MEI4
ENSG00000115163.15	11.3537	0.634652	1.10727	0.573165	0.566533	0.999937	ENSG00000115163	CENPA
ENSG00000233396.8	11.3556	0.897409	1.17139	0.766107	0.443612	0.999937	ENSG00000233396	LINC01719
ENSG00000262728.6	11.3559	-0.234939	1.13944	-0.206189	0.836643	0.999937	ENSG00000262728	AC123768.2
ENSG00000135502.18	11.3584	0.668736	1.14377	0.584678	0.558764	0.999937	ENSG00000135502	SLC26A10
ENSG00000181359.5	11.3594	1.43628	1.19072	1.20622	0.227731	0.999937	ENSG00000181359	HSP90AA6P
ENSG00000127472.11	11.3624	0.47329	1.18787	0.398434	0.69031	0.999937	ENSG00000127472	PLA2G5
ENSG00000094755.17	11.3696	1.07052	1.56352	0.684689	0.49354	0.999937	ENSG00000094755	GABRP
ENSG00000087237.12	11.3799	3.37551	1.4995	2.25109	0.0243797	0.999937	ENSG00000087237	CETP
ENSG00000224411.3	11.3876	0.828289	1.30173	0.636298	0.524582	0.999937	ENSG00000224411	HSP90AA2P
ENSG00000231185.7	11.3983	-0.163802	1.13683	-0.144088	0.885431	0.999937	ENSG00000231185	SPRY4-AS1
ENSG00000186648.15	11.4011	0.329624	1.15665	0.284982	0.775658	0.999937	ENSG00000186648	CARMIL3
ENSG00000179168.15	11.4114	1.20306	1.16686	1.03102	0.302531	0.999937	ENSG00000179168	GGN
ENSG00000100344.11	11.4127	-0.211654	1.13147	-0.187062	0.851612	0.999937	ENSG00000100344	PNPLA3
ENSG00000286273.1	11.4233	-0.394587	1.28814	-0.306323	0.759359	0.999937	ENSG00000286273	AC078816.1
ENSG00000130751.10	11.4237	0.629295	1.18533	0.530904	0.595485	0.999937	ENSG00000130751	NPAS1
ENSG00000185271.9	11.4263	1.66338	1.37149	1.21283	0.225194	0.999937	ENSG00000185271	KLHL33
ENSG00000213433.5	11.4333	1.23633	1.22702	1.00759	0.313653	0.999937	ENSG00000213433	RPLP1P6
ENSG00000274002.1	11.4339	0.278169	1.15596	0.240638	0.809835	0.999937	ENSG00000274002	AL135999.3
ENSG00000164591.14	11.4354	0.979327	1.4338	0.68303	0.494588	0.999937	ENSG00000164591	MYOZ3
ENSG00000242268.3	11.4371	0.409496	1.19875	0.341602	0.73265	0.999937	ENSG00000242268	LINC02082
ENSG00000258561.2	11.4403	-0.860424	1.14136	-0.753858	0.450934	0.999937	ENSG00000258561	AL359232.1
ENSG00000203685.10	11.4413	0.49788	1.22451	0.406597	0.684304	0.999937	ENSG00000203685	STUM
ENSG00000139767.10	11.4446	0.591513	1.6438	0.359844	0.718964	0.999937	ENSG00000139767	SRRM4
ENSG00000237669.1	11.457	0.286745	1.12236	0.255485	0.798349	0.999937	ENSG00000237669	AL671277.2
ENSG00000273154.3	11.4574	-0.173037	1.59906	-0.108212	0.913828	0.999937	ENSG00000273154	AL121845.3
ENSG00000173198.6	11.4621	2.34891	1.24514	1.88645	0.0592337	0.999937	ENSG00000173198	CYSLTR1
ENSG00000247157.7	11.4665	0.444026	1.16301	0.38179	0.702617	0.999937	ENSG00000247157	LINC01252
ENSG00000258227.7	11.4688	-0.0285281	1.3559	-0.02104	0.983214	0.999937	ENSG00000258227	CLEC5A
ENSG00000061455.11	11.471	0.200882	1.13764	0.176578	0.85984	0.999937	ENSG00000061455	PRDM6
ENSG00000233101.10	11.4752	-0.970296	1.27609	-0.760368	0.447035	0.999937	ENSG00000233101	HOXB-AS3
ENSG00000260563.3	11.476	-0.000559929	1.15052	-0.000486676	0.999612	0.999937	ENSG00000260563	AC132872.1
ENSG00000063438.18	11.4776	0.120394	1.27211	0.094641	0.9246	0.999937	ENSG00000063438	AHRR
ENSG00000274386.5	11.4794	0.0910444	1.23492	0.0737251	0.941229	0.999937	ENSG00000274386	TMEM269
ENSG00000279168.2	11.4926	2.36233	1.31224	1.80023	0.0718251	0.999937	ENSG00000279168	AC105052.4
ENSG00000286787.1	11.4982	1.71578	1.39257	1.2321	0.217913	0.999937	ENSG00000286787	AL110114.1
ENSG00000215068.8	11.4997	-0.342172	1.16694	-0.293222	0.769352	0.999937	ENSG00000215068	AC025171.2
ENSG00000248161.5	11.5068	1.64756	1.14549	1.4383	0.150348	0.999937	ENSG00000248161	AC098487.1
ENSG00000100365.16	11.5114	-1.01536	1.21196	-0.83778	0.402154	0.999937	ENSG00000100365	NCF4
ENSG00000285815.1	11.5162	1.29376	1.29871	0.996185	0.31916	0.999937	ENSG00000285815	GET1-SH3BGR
ENSG00000269473.1	11.5179	0.079607	1.29971	0.0612499	0.95116	0.999937	ENSG00000269473	AC012313.8
ENSG00000278873.1	11.5194	0.782585	1.12906	0.693128	0.488229	0.999937	ENSG00000278873	PRO1804
ENSG00000273540.4	11.523	3.04346	1.53636	1.98095	0.0475968	0.999937	ENSG00000273540	AGBL1
ENSG00000257743.8	11.5302	1.6826	1.15533	1.45638	0.145288	0.999937	ENSG00000257743	MGAM2
ENSG00000243819.4	11.5327	1.11042	1.15552	0.960976	0.336564	0.999937	ENSG00000243819	RN7SL832P
ENSG00000204044.6	11.5342	0.448973	1.13489	0.395608	0.692394	0.999937	ENSG00000204044	SLC12A5-AS1
ENSG00000215014.5	11.5348	0.817104	1.12869	0.723939	0.469103	0.999937	ENSG00000215014	AL645728.1
ENSG00000257433.6	11.5368	-1.27252	1.31878	-0.964919	0.334585	0.999937	ENSG00000257433	AC004241.1
ENSG00000287665.1	11.5402	0.145931	1.14864	0.127047	0.898904	0.999937	ENSG00000287665	AC092428.1
ENSG00000261556.10	11.5535	-0.882822	1.26717	-0.69669	0.485997	0.999937	ENSG00000261556	SMG1P7
ENSG00000089250.19	11.5544	-1.06674	1.59711	-0.667921	0.504184	0.999937	ENSG00000089250	NOS1
ENSG00000267198.1	11.5614	0.541478	1.24675	0.434313	0.664061	0.999937	ENSG00000267198	AC091132.4
ENSG00000239887.6	11.565	0.52027	1.10096	0.472561	0.636526	0.999937	ENSG00000239887	C1orf226
ENSG00000223551.1	11.5654	-0.0193177	1.15113	-0.0167816	0.986611	0.999937	ENSG00000223551	TMSB4XP4
ENSG00000286535.1	11.5664	0.198945	1.11405	0.178578	0.858269	0.999937	ENSG00000286535	AC139019.1
ENSG00000234883.6	11.5695	0.126992	1.13917	0.111478	0.911238	0.999937	ENSG00000234883	MIR155HG
ENSG00000253658.6	11.5702	1.15052	1.18659	0.969603	0.332245	0.999937	ENSG00000253658	LINC01592
ENSG00000233885.7	11.5812	-0.981741	1.16327	-0.843952	0.398696	0.999937	ENSG00000233885	YEATS2-AS1
ENSG00000230408.3	11.5823	-0.448697	1.11882	-0.401045	0.688387	0.999937	ENSG00000230408	BZW1-AS1
ENSG00000244675.2	11.5868	1.49272	1.28678	1.16005	0.24603	0.999937	ENSG00000244675	AC108676.1
ENSG00000263826.1	11.5877	-0.597311	1.11985	-0.533384	0.593768	0.999937	ENSG00000263826	AC112907.3
ENSG00000177602.5	11.6021	1.02432	1.1704	0.875193	0.381469	0.999937	ENSG00000177602	HASPIN
ENSG00000237943.7	11.6035	1.06013	1.16046	0.913538	0.36096	0.999937	ENSG00000237943	PRKCQ-AS1
ENSG00000206432.4	11.6111	1.29833	1.24222	1.04517	0.295945	0.999937	ENSG00000206432	TMEM200C
ENSG00000269352.1	11.6124	0.130177	1.09598	0.118777	0.905452	0.999937	ENSG00000269352	PTOV1-AS2
ENSG00000166428.14	11.6297	1.73712	1.28084	1.35624	0.175024	0.999937	ENSG00000166428	PLD4
ENSG00000227782.2	11.6399	-0.576605	1.14088	-0.505405	0.613275	0.999937	ENSG00000227782	AC002553.1
ENSG00000164106.8	11.6439	0.341258	1.13018	0.301949	0.762691	0.999937	ENSG00000164106	SCRG1
ENSG00000232000.3	11.6471	0.743178	1.3542	0.548795	0.583146	0.999937	ENSG00000232000	CLCN3P1
ENSG00000116544.12	11.6493	1.32753	1.12568	1.17931	0.238276	0.999937	ENSG00000116544	DLGAP3
ENSG00000286999.1	11.6564	0.975102	1.18082	0.825783	0.408927	0.999937	ENSG00000286999	AL121581.2
ENSG00000269900.3	11.6572	1.68881	3.95579	0.426921	0.669437	0.999937	ENSG00000269900	RMRP
ENSG00000111913.20	11.6592	0.439342	1.34498	0.326653	0.74393	0.999937	ENSG00000111913	RIPOR2
ENSG00000160097.19	11.6594	-0.425238	1.33602	-0.318287	0.750268	0.999937	ENSG00000160097	FNDC5
ENSG00000230417.12	11.6638	0.270054	1.19731	0.22555	0.821552	0.999937	ENSG00000230417	LINC00595
ENSG00000277128.2	11.6652	2.94973	1.42241	2.07376	0.0381018	0.999937	ENSG00000277128	AL589743.4
ENSG00000175874.10	11.6694	1.12103	1.19341	0.939355	0.347548	0.999937	ENSG00000175874	CREG2
ENSG00000258777.1	11.6749	-0.872741	1.14547	-0.761907	0.446115	0.999937	ENSG00000258777	HIF1A-AS1
ENSG00000257817.2	11.6765	0.61203	1.20418	0.508257	0.611273	0.999937	ENSG00000257817	AC026765.3
ENSG00000140470.14	11.6802	0.837148	1.14186	0.733143	0.463471	0.999937	ENSG00000140470	ADAMTS17
ENSG00000125510.18	11.6805	-0.925484	1.31278	-0.70498	0.480823	0.999937	ENSG00000125510	OPRL1
ENSG00000078900.15	11.682	2.22458	1.17506	1.89317	0.0583355	0.999937	ENSG00000078900	TP73
ENSG00000109072.14	11.6831	-0.0739112	1.10531	-0.0668694	0.946686	0.999937	ENSG00000109072	VTN
ENSG00000234789.1	11.6863	-0.479901	1.10932	-0.432608	0.6653	0.999937	ENSG00000234789	AL590369.1
ENSG00000177483.11	11.6917	-0.278761	1.16885	-0.238491	0.8115	0.999937	ENSG00000177483	RBM44
ENSG00000261052.6	11.6936	-0.43671	1.2029	-0.363046	0.71657	0.999937	ENSG00000261052	SULT1A3
ENSG00000246214.2	11.6967	0.672849	1.10359	0.609689	0.542068	0.999937	ENSG00000246214	AC024588.1
ENSG00000100336.17	11.6984	0.722703	1.21193	0.596325	0.550958	0.999937	ENSG00000100336	APOL4
ENSG00000267001.1	11.6985	-1.1906	1.16451	-1.0224	0.306591	0.999937	ENSG00000267001	AC006538.2
ENSG00000100368.14	11.6994	0.566257	1.52631	0.370998	0.710639	0.999937	ENSG00000100368	CSF2RB
ENSG00000177575.12	11.7031	1.83304	1.27316	1.43975	0.149937	0.999937	ENSG00000177575	CD163
ENSG00000114786.16	11.705	-0.169028	1.13828	-0.148494	0.881953	0.999937	ENSG00000114786	ABHD14A-ACY1
ENSG00000106483.12	11.7085	0.0716432	1.10504	0.064833	0.948307	0.999937	ENSG00000106483	SFRP4
ENSG00000105146.13	11.7203	1.55507	1.28252	1.21251	0.225316	0.999937	ENSG00000105146	AURKC
ENSG00000261167.1	11.728	1.35227	1.17921	1.14676	0.251482	0.999937	ENSG00000261167	AC107027.3
ENSG00000273066.5	11.7319	1.43616	1.12882	1.27227	0.203276	0.999937	ENSG00000273066	AL355987.4
ENSG00000287182.1	11.7334	-0.0626048	1.10451	-0.0566813	0.954799	0.999937	ENSG00000287182	AC131953.2
ENSG00000277586.4	11.7337	1.53862	1.14899	1.33912	0.180533	0.999937	ENSG00000277586	NEFL
ENSG00000119283.15	11.734	1.19827	1.29348	0.926399	0.354239	0.999937	ENSG00000119283	TRIM67
ENSG00000234432.4	11.7345	0.774713	1.09546	0.707204	0.47944	0.999937	ENSG00000234432	AC092171.3
ENSG00000223704.2	11.7373	2.28934	1.39216	1.64445	0.100084	0.999937	ENSG00000223704	LINC01422
ENSG00000132744.8	11.7414	1.01972	1.16696	0.873822	0.382215	0.999937	ENSG00000132744	ACY3
ENSG00000171885.18	11.7445	0.202503	1.20668	0.167819	0.866726	0.999937	ENSG00000171885	AQP4
ENSG00000269906.1	11.7516	0.270753	1.12672	0.240302	0.810096	0.999937	ENSG00000269906	AL606834.1
ENSG00000245248.8	11.7525	0.279489	1.20406	0.232121	0.816444	0.999937	ENSG00000245248	USP2-AS1
ENSG00000111339.12	11.7544	0.318906	1.23272	0.258701	0.795866	0.999937	ENSG00000111339	ART4
ENSG00000219470.1	11.7549	0.529739	1.1178	0.473913	0.635562	0.999937	ENSG00000219470	AL355802.1
ENSG00000259660.2	11.756	0.445439	1.48578	0.299801	0.764329	0.999937	ENSG00000259660	DNM1P47
ENSG00000183484.12	11.7635	1.31222	1.17895	1.11304	0.26569	0.999937	ENSG00000183484	GPR132
ENSG00000009694.13	11.7652	0.954294	1.10725	0.861862	0.388763	0.999937	ENSG00000009694	TENM1
ENSG00000278713.1	11.7663	-0.106571	1.2231	-0.0871324	0.930566	0.999937	ENSG00000278713	AC120114.2
ENSG00000100399.16	11.7678	-0.406281	1.14465	-0.354937	0.722637	0.999937	ENSG00000100399	CHADL
ENSG00000229267.3	11.771	1.15641	1.11576	1.03643	0.300003	0.999937	ENSG00000229267	SNHG31
ENSG00000179344.16	11.7733	1.14141	1.22698	0.930265	0.352234	0.999937	ENSG00000179344	HLA-DQB1
ENSG00000230163.1	11.7771	0.169989	1.24107	0.13697	0.891054	0.999937	ENSG00000230163	AL122010.1
ENSG00000215354.9	11.7854	1.39134	3.86157	0.360305	0.718619	0.999937	ENSG00000215354	FAM90A24P
ENSG00000210127.1	11.7942	0.00143799	1.2026	0.00119573	0.999046	0.999937	ENSG00000210127	MT-TA
ENSG00000279091.1	11.7952	2.98907	1.33877	2.23269	0.0255693	0.999937	ENSG00000279091	AC026523.2
ENSG00000185862.7	11.7954	-0.772128	1.12565	-0.68594	0.492751	0.999937	ENSG00000185862	EVI2B
ENSG00000198929.13	11.8007	-0.024395	1.20431	-0.0202564	0.983839	0.999937	ENSG00000198929	NOS1AP
ENSG00000261335.1	11.8107	0.455233	1.10702	0.411224	0.680909	0.999937	ENSG00000261335	AC005837.1
ENSG00000282851.2	11.8109	0.797785	1.15328	0.691755	0.489091	0.999937	ENSG00000282851	BISPR
ENSG00000259595.1	11.8132	-0.955103	1.14717	-0.832576	0.405084	0.999937	ENSG00000259595	AC025043.1
ENSG00000270012.1	11.8172	0.0963062	1.24376	0.0774315	0.93828	0.999937	ENSG00000270012	AC232271.1
ENSG00000106328.10	11.8192	0.287823	1.15075	0.250118	0.802496	0.999937	ENSG00000106328	FSCN3
ENSG00000261613.2	11.8207	0.300614	1.11813	0.268854	0.788042	0.999937	ENSG00000261613	AC093525.6
ENSG00000284686.1	11.8258	0.0895383	1.10456	0.0810625	0.935392	0.999937	ENSG00000284686	AC119674.2
ENSG00000266498.1	11.8272	0.639249	1.12813	0.566646	0.570955	0.999937	ENSG00000266498	AC055811.3
ENSG00000217929.4	11.8307	2.48587	1.29352	1.92179	0.0546325	0.999937	ENSG00000217929	CICP18
ENSG00000270673.1	11.8328	0.443399	1.14381	0.387652	0.698274	0.999937	ENSG00000270673	YTHDF3-AS1
ENSG00000180938.6	11.8336	0.671811	1.1614	0.57845	0.56296	0.999937	ENSG00000180938	ZNF572
ENSG00000268635.2	11.8355	-0.582107	1.13066	-0.514837	0.606667	0.999937	ENSG00000268635	AP003680.1
ENSG00000214694.11	11.8375	1.41718	1.14835	1.23409	0.217168	0.999937	ENSG00000214694	ARHGEF33
ENSG00000084453.16	11.8379	-0.956677	1.25495	-0.762324	0.445867	0.999937	ENSG00000084453	SLCO1A2
ENSG00000258940.2	11.8406	-0.57898	1.10756	-0.522751	0.601148	0.999937	ENSG00000258940	AL132639.2
ENSG00000141622.14	11.8482	2.07849	1.20846	1.71995	0.0854422	0.999937	ENSG00000141622	RNF165
ENSG00000287262.1	11.8536	1.18243	1.15359	1.025	0.305364	0.999937	ENSG00000287262	AC021148.3
ENSG00000055955.17	11.8566	0.310477	1.20832	0.256949	0.797218	0.999937	ENSG00000055955	ITIH4
ENSG00000196917.6	11.8571	2.98119	1.54836	1.92539	0.0541803	0.999937	ENSG00000196917	HCAR1
ENSG00000273541.1	11.8601	-0.45137	1.1301	-0.399406	0.689594	0.999937	ENSG00000273541	AL137060.1
ENSG00000176723.10	11.8646	1.21628	1.11237	1.09342	0.27421	0.999937	ENSG00000176723	ZNF843
ENSG00000104313.20	11.8652	1.23273	1.33278	0.924929	0.355003	0.999937	ENSG00000104313	EYA1
ENSG00000184956.16	11.8775	3.07002	1.18829	2.58355	0.00977899	0.999937	ENSG00000184956	MUC6
ENSG00000238198.2	11.8776	1.94882	1.11745	1.74399	0.0811606	0.999937	ENSG00000238198	LRIG2-DT
ENSG00000261054.1	11.8792	0.219799	1.16811	0.188166	0.850746	0.999937	ENSG00000261054	AC036108.2
ENSG00000219712.1	11.8823	-1.05797	1.15553	-0.915567	0.359894	0.999937	ENSG00000219712	AL357054.1
ENSG00000285943.1	11.8865	-0.792148	1.14896	-0.689447	0.490542	0.999937	ENSG00000285943	AC112128.1
ENSG00000253161.5	11.8894	-0.566467	1.12146	-0.505116	0.613477	0.999937	ENSG00000253161	LINC01605
ENSG00000144550.13	11.8896	-0.445063	1.1314	-0.393375	0.694042	0.999937	ENSG00000144550	CPNE9
ENSG00000250007.7	11.8903	0.172266	1.12712	0.152837	0.878527	0.999937	ENSG00000250007	AC087457.1
ENSG00000237101.1	11.8905	0.521596	1.09983	0.474251	0.635321	0.999937	ENSG00000237101	AC092809.4
ENSG00000063127.16	11.8954	0.249816	1.18454	0.210897	0.832967	0.999937	ENSG00000063127	SLC6A16
ENSG00000257207.5	11.896	0.51855	1.31155	0.395371	0.692569	0.999937	ENSG00000257207	AC112229.3
ENSG00000143257.12	11.8961	0.305786	1.08135	0.282782	0.777344	0.999937	ENSG00000143257	NR1I3
ENSG00000263020.6	11.8971	0.563822	1.32116	0.426761	0.669553	0.999937	ENSG00000263020	AL662899.2
ENSG00000141469.18	11.8987	2.00434	1.19165	1.68199	0.092571	0.999937	ENSG00000141469	SLC14A1
ENSG00000279670.1	11.8991	0.636929	1.09563	0.581335	0.561015	0.999937	ENSG00000279670	AL359922.3
ENSG00000177688.7	11.9083	0.410788	1.15812	0.354702	0.722813	0.999937	ENSG00000177688	SUMO4
ENSG00000262420.3	11.9087	0.475285	1.11027	0.42808	0.668593	0.999937	ENSG00000262420	AC007613.1
ENSG00000269374.1	11.9143	-0.903832	1.13544	-0.796017	0.426022	0.999937	ENSG00000269374	AC011497.2
ENSG00000278949.1	11.9217	0.30404	1.14108	0.266449	0.789893	0.999937	ENSG00000278949	AC127070.4
ENSG00000087128.10	11.9375	3.06641	1.54625	1.98313	0.0473529	0.999937	ENSG00000087128	TMPRSS11E
ENSG00000285865.1	11.9394	0.112334	1.14204	0.0983622	0.921645	0.999937	ENSG00000285865	AC010285.3
ENSG00000114841.17	11.9401	-0.671944	1.094	-0.614211	0.539076	0.999937	ENSG00000114841	DNAH1
ENSG00000164694.17	11.9419	1.73599	1.17428	1.47835	0.139313	0.999937	ENSG00000164694	FNDC1
ENSG00000176472.10	11.9427	0.858449	1.08503	0.791177	0.428841	0.999937	ENSG00000176472	ZNF575
ENSG00000279277.2	11.9438	0.550156	1.24368	0.442362	0.658227	0.999937	ENSG00000279277	AC012020.1
ENSG00000253851.1	11.9449	0.186209	1.31908	0.141166	0.887739	0.999937	ENSG00000253851	AC025370.1
ENSG00000171189.17	11.9472	0.772396	1.1857	0.651426	0.514772	0.999937	ENSG00000171189	GRIK1
ENSG00000198711.5	11.9518	0.984352	1.12276	0.876727	0.380635	0.999937	ENSG00000198711	SSBP3-AS1
ENSG00000132185.18	11.9522	-0.263238	1.21799	-0.216124	0.828891	0.999937	ENSG00000132185	FCRLA
ENSG00000254363.6	11.9525	0.144365	1.08499	0.133056	0.894149	0.999937	ENSG00000254363	AC011379.2
ENSG00000007968.7	11.9527	0.865185	1.29303	0.669114	0.503423	0.999937	ENSG00000007968	E2F2
ENSG00000172247.4	11.9551	-0.183423	1.1056	-0.165903	0.868233	0.999937	ENSG00000172247	C1QTNF4
ENSG00000267605.7	11.9583	-0.349438	1.0869	-0.321499	0.747833	0.999937	ENSG00000267605	AC016590.1
ENSG00000170577.8	11.9588	1.12658	1.11433	1.01099	0.312021	0.999937	ENSG00000170577	SIX2
ENSG00000176912.5	11.959	-0.924948	1.10193	-0.839389	0.401251	0.999937	ENSG00000176912	TYMSOS
ENSG00000156049.7	11.9605	-0.0356937	1.11595	-0.0319851	0.974484	0.999937	ENSG00000156049	GNA14
ENSG00000233672.9	11.9627	0.992023	1.24752	0.795198	0.426499	0.999937	ENSG00000233672	RNASEH2B-AS1
ENSG00000131668.14	11.9656	2.37141	1.40769	1.6846	0.0920654	0.999937	ENSG00000131668	BARX1
ENSG00000110900.16	11.9677	0.732521	1.17691	0.622409	0.533673	0.999937	ENSG00000110900	TSPAN11
ENSG00000164344.16	11.9787	0.684962	1.07893	0.634856	0.525522	0.999937	ENSG00000164344	KLKB1
ENSG00000148408.13	11.9794	-0.046121	1.08077	-0.0426743	0.965961	0.999937	ENSG00000148408	CACNA1B
ENSG00000130270.16	11.9882	1.32898	1.10134	1.2067	0.227549	0.999937	ENSG00000130270	ATP8B3
ENSG00000187815.10	11.9897	0.0192294	1.1058	0.0173897	0.986126	0.999937	ENSG00000187815	ZFP69
ENSG00000129910.8	11.9898	1.54902	1.35775	1.14088	0.253921	0.999937	ENSG00000129910	CDH15
ENSG00000232818.2	11.9899	0.705362	1.0779	0.654388	0.512862	0.999937	ENSG00000232818	RPS2P32
ENSG00000099834.19	11.9915	0.510057	1.19526	0.426733	0.669574	0.999937	ENSG00000099834	CDHR5
ENSG00000204682.8	11.9927	1.33402	1.12128	1.18973	0.234153	0.999937	ENSG00000204682	MIR1915HG
ENSG00000261822.1	11.9961	0.939359	1.08138	0.86867	0.385028	0.999937	ENSG00000261822	AC018362.2
ENSG00000272661.1	12.0011	-0.212463	1.12923	-0.18815	0.850759	0.999937	ENSG00000272661	AC021097.1
ENSG00000135917.16	12.0052	1.23237	1.15609	1.06598	0.286431	0.999937	ENSG00000135917	SLC19A3
ENSG00000163888.4	12.0066	0.691803	1.092	0.63352	0.526394	0.999937	ENSG00000163888	CAMK2N2
ENSG00000245526.11	12.0099	2.67968	1.23306	2.1732	0.0297655	0.999937	ENSG00000245526	LINC00461
ENSG00000146399.2	12.0129	1.96065	1.50707	1.30097	0.193268	0.999937	ENSG00000146399	TAAR1
ENSG00000127241.17	12.0152	1.70072	1.18208	1.43875	0.150221	0.999937	ENSG00000127241	MASP1
ENSG00000232187.1	12.0219	-0.703519	1.22205	-0.575687	0.564827	0.999937	ENSG00000232187	FTH1P7
ENSG00000249996.1	12.0258	-0.119387	1.09929	-0.108604	0.913517	0.999937	ENSG00000249996	PPIC-AS1
ENSG00000279948.1	12.0276	1.08041	1.21031	0.892667	0.372035	0.999937	ENSG00000279948	AC008895.1
ENSG00000283445.1	12.0298	2.25584	1.34813	1.67331	0.0942666	0.999937	ENSG00000283445	AL136985.3
ENSG00000233723.9	12.0313	0.444096	1.10998	0.400093	0.689088	0.999937	ENSG00000233723	LINC01122
ENSG00000237638.2	12.0332	-0.776008	1.12721	-0.688433	0.49118	0.999937	ENSG00000237638	LINC02245
ENSG00000237928.6	12.0376	-0.000265962	1.16653	-0.000227995	0.999818	0.999937	ENSG00000237928	NFIA-AS2
ENSG00000280109.3	12.0436	0.196529	1.19683	0.164208	0.869568	0.999937	ENSG00000280109	PLAC4
ENSG00000166473.17	12.0454	2.61943	1.39575	1.87672	0.0605567	0.999937	ENSG00000166473	PKD1L2
ENSG00000268230.5	12.0457	-0.131882	1.13216	-0.116487	0.907267	0.999937	ENSG00000268230	AC012313.3
ENSG00000171860.5	12.0461	1.13469	1.20168	0.944256	0.345039	0.999937	ENSG00000171860	C3AR1
ENSG00000204961.7	12.0467	-0.259099	1.11007	-0.233407	0.815445	0.999937	ENSG00000204961	PCDHA9
ENSG00000100024.15	12.0527	0.451569	1.13811	0.396769	0.691538	0.999937	ENSG00000100024	UPB1
ENSG00000109927.10	12.0535	0.307021	1.10803	0.277087	0.781714	0.999937	ENSG00000109927	TECTA
ENSG00000229847.9	12.0567	0.815394	1.67483	0.486852	0.626363	0.999937	ENSG00000229847	EMX2OS
ENSG00000170523.3	12.0585	0.199757	1.60809	0.12422	0.901141	0.999937	ENSG00000170523	KRT83
ENSG00000255200.1	12.0617	0.368706	1.14075	0.323215	0.746532	0.999937	ENSG00000255200	PGAM1P8
ENSG00000188629.13	12.0654	-4.34742	1.52523	-2.85033	0.00436737	0.999937	ENSG00000188629	ZNF177
ENSG00000232453.7	12.0664	-0.573321	1.09355	-0.524277	0.600086	0.999937	ENSG00000232453	LINC02777
ENSG00000159915.12	12.0664	0.170428	1.1153	0.15281	0.878548	0.999937	ENSG00000159915	ZNF233
ENSG00000249307.7	12.0686	0.749697	1.23598	0.606562	0.544142	0.999937	ENSG00000249307	LINC01088
ENSG00000253537.3	12.0693	1.46722	1.1608	1.26398	0.206238	0.999937	ENSG00000253537	PCDHGA7
ENSG00000258676.5	12.0726	0.233543	1.29306	0.180613	0.856671	0.999937	ENSG00000258676	AC091544.2
ENSG00000213693.4	12.0739	-0.0170786	1.087	-0.0157117	0.987464	0.999937	ENSG00000213693	SEC14L1P1
ENSG00000287555.1	12.075	-0.631166	1.10159	-0.572961	0.566671	0.999937	ENSG00000287555	AC023424.2
ENSG00000171056.8	12.0774	-0.00681325	1.08851	-0.00625926	0.995006	0.999937	ENSG00000171056	SOX7
ENSG00000105219.10	12.0843	-0.979122	1.2655	-0.773704	0.439106	0.999937	ENSG00000105219	CCNP
ENSG00000173567.15	12.0869	0.819551	1.15793	0.707776	0.479085	0.999937	ENSG00000173567	ADGRF3
ENSG00000175170.16	12.0909	0.508649	1.13571	0.44787	0.654247	0.999937	ENSG00000175170	FAM182B
ENSG00000279673.1	12.0976	0.823498	1.12378	0.732796	0.463683	0.999937	ENSG00000279673	AC092919.2
ENSG00000285933.1	12.1004	-0.536043	1.19859	-0.447229	0.654709	0.999937	ENSG00000285933	AP003498.2
ENSG00000120659.15	12.1007	-0.715785	1.15796	-0.618146	0.536479	0.999937	ENSG00000120659	TNFSF11
ENSG00000264501.2	12.101	1.86066	1.2756	1.45865	0.144661	0.999937	ENSG00000264501	RN7SL731P
ENSG00000229337.2	12.1025	0.694032	1.17225	0.59205	0.553817	0.999937	ENSG00000229337	AC079305.2
ENSG00000261587.2	12.1126	-1.06527	1.09607	-0.9719	0.3311	0.999937	ENSG00000261587	TMEM249
ENSG00000196109.9	12.1134	0.564285	1.12029	0.503694	0.614476	0.999937	ENSG00000196109	ZNF676
ENSG00000278766.2	12.115	0.350047	1.10753	0.31606	0.751957	0.999937	ENSG00000278766	AC092683.2
ENSG00000161180.11	12.1212	-0.255472	1.21542	-0.210192	0.833518	0.999937	ENSG00000161180	CCDC116
ENSG00000233828.5	12.124	0.659696	1.37635	0.479307	0.63172	0.999937	ENSG00000233828	LINC01949
ENSG00000164161.10	12.1247	1.93846	1.43588	1.35001	0.177012	0.999937	ENSG00000164161	HHIP
ENSG00000263327.6	12.1275	-0.114975	1.12678	-0.102038	0.918726	0.999937	ENSG00000263327	TAPT1-AS1
ENSG00000197181.12	12.133	1.01512	1.25367	0.80972	0.418101	0.999937	ENSG00000197181	PIWIL2
ENSG00000285628.1	12.1342	-0.12317	1.31785	-0.0934628	0.925536	0.999937	ENSG00000285628	AC126755.6
ENSG00000279047.4	12.1352	0.884337	1.18235	0.747951	0.45449	0.999937	ENSG00000279047	AC244517.5
ENSG00000213085.10	12.1353	0.759584	1.09413	0.694237	0.487534	0.999937	ENSG00000213085	CFAP45
ENSG00000253552.8	12.1359	2.67649	1.33761	2.00096	0.0453972	0.999937	ENSG00000253552	HOXA-AS2
ENSG00000184985.16	12.136	0.844034	1.18012	0.715209	0.47448	0.999937	ENSG00000184985	SORCS2
ENSG00000159556.10	12.137	-0.164614	1.35518	-0.12147	0.903319	0.999937	ENSG00000159556	ISL2
ENSG00000179855.9	12.1398	1.35717	1.15526	1.17477	0.240085	0.999937	ENSG00000179855	GIPC3
ENSG00000287281.1	12.1444	1.32555	1.09144	1.21449	0.22456	0.999937	ENSG00000287281	AC012101.2
ENSG00000175764.14	12.1466	1.91367	1.13679	1.6834	0.0922978	0.999937	ENSG00000175764	TTLL11
ENSG00000235381.1	12.147	0.878327	1.20911	0.726425	0.467578	0.999937	ENSG00000235381	AL596202.1
ENSG00000136574.18	12.1478	0.575319	1.10467	0.520807	0.602501	0.999937	ENSG00000136574	GATA4
ENSG00000270933.1	12.1487	1.89433	1.339	1.41474	0.157145	0.999937	ENSG00000270933	AC010719.1
ENSG00000095917.14	12.1529	1.48937	1.36858	1.08826	0.276482	0.999937	ENSG00000095917	TPSD1
ENSG00000240764.4	12.1542	1.70108	1.29375	1.31484	0.188563	0.999937	ENSG00000240764	PCDHGC5
ENSG00000066056.14	12.1547	0.212928	1.17798	0.180757	0.856559	0.999937	ENSG00000066056	TIE1
ENSG00000259684.1	12.1554	-0.334529	1.09729	-0.304868	0.760467	0.999937	ENSG00000259684	AC084756.1
ENSG00000259945.1	12.1595	-0.714442	1.16674	-0.612341	0.540312	0.999937	ENSG00000259945	AC027682.2
ENSG00000117598.13	12.1599	1.72643	1.16687	1.47953	0.138998	0.999937	ENSG00000117598	PLPPR5
ENSG00000279786.1	12.1632	-0.0729519	1.0778	-0.067686	0.946036	0.999937	ENSG00000279786	AC105235.1
ENSG00000186652.10	12.1648	3.94783	1.46294	2.69856	0.00696409	0.999937	ENSG00000186652	PRG2
ENSG00000205863.11	12.1699	0.642257	1.1732	0.547441	0.584076	0.999937	ENSG00000205863	C1QTNF9B
ENSG00000230732.4	12.1706	-0.0782337	1.09228	-0.0716241	0.942901	0.999937	ENSG00000230732	AC016949.1
ENSG00000213228.5	12.1769	0.551592	1.1188	0.49302	0.621999	0.999937	ENSG00000213228	RPL12P38
ENSG00000280367.1	12.1797	0.497063	1.25781	0.395182	0.692709	0.999937	ENSG00000280367	AP002364.1
ENSG00000284930.1	12.1838	-0.35651	1.43642	-0.248194	0.803985	0.999937	ENSG00000284930	AC005280.2
ENSG00000247287.3	12.1838	0.454971	1.08735	0.418422	0.675639	0.999937	ENSG00000247287	AL359220.1
ENSG00000133937.5	12.1853	0.192161	1.12009	0.171558	0.863785	0.999937	ENSG00000133937	GSC
ENSG00000175564.13	12.1895	0.123182	1.26356	0.0974884	0.922339	0.999937	ENSG00000175564	UCP3
ENSG00000281741.2	12.1909	-1.62285	1.51567	-1.07071	0.284298	0.999937	ENSG00000281741	AC241377.3
ENSG00000271754.1	12.2321	0.0135097	1.07912	0.0125192	0.990011	0.999937	ENSG00000271754	AL355802.3
ENSG00000107147.14	12.2376	0.258446	1.24957	0.206827	0.836145	0.999937	ENSG00000107147	KCNT1
ENSG00000143631.11	12.2435	0.931909	1.12427	0.828902	0.40716	0.999937	ENSG00000143631	FLG
ENSG00000285625.1	12.2466	-1.38529	1.2521	-1.10637	0.268564	0.999937	ENSG00000285625	AC117378.1
ENSG00000167619.13	12.2492	0.693594	1.12786	0.614967	0.538577	0.999937	ENSG00000167619	TMEM145
ENSG00000104833.12	12.2524	0.860869	1.39383	0.617629	0.53682	0.999937	ENSG00000104833	TUBB4A
ENSG00000160282.14	12.2561	0.761273	1.08156	0.703867	0.481516	0.999937	ENSG00000160282	FTCD
ENSG00000280388.1	12.2571	0.226979	1.15738	0.196114	0.844521	0.999937	ENSG00000280388	AC006330.1
ENSG00000250519.7	12.2642	0.798293	1.10217	0.724295	0.468885	0.999937	ENSG00000250519	AP002784.1
ENSG00000228063.2	12.2644	-0.228224	1.07384	-0.21253	0.831693	0.999937	ENSG00000228063	LYPLAL1-DT
ENSG00000284779.2	12.2734	-1.22965	1.39174	-0.883534	0.376948	0.999937	ENSG00000284779	AC132217.2
ENSG00000196205.8	12.2774	-0.316954	1.12907	-0.280721	0.778924	0.999937	ENSG00000196205	EEF1A1P5
ENSG00000279598.1	12.2863	0.136734	1.10754	0.123458	0.901745	0.999937	ENSG00000279598	AC009948.3
ENSG00000179674.4	12.2937	1.77249	1.13694	1.55901	0.118994	0.999937	ENSG00000179674	ARL14
ENSG00000273297.2	12.2946	-0.345462	1.09004	-0.316927	0.751299	0.999937	ENSG00000273297	AC009275.1
ENSG00000271851.1	12.3068	0.770049	1.099	0.700683	0.483501	0.999937	ENSG00000271851	AC087501.4
ENSG00000242173.10	12.3084	0.334409	1.06693	0.313429	0.753954	0.999937	ENSG00000242173	ARHGDIG
ENSG00000279602.1	12.3104	-0.916813	1.26887	-0.722544	0.46996	0.999937	ENSG00000279602	AC109326.1
ENSG00000278390.5	12.3145	-1.29456	1.08178	-1.19669	0.231427	0.999937	ENSG00000278390	AL354696.2
ENSG00000255644.1	12.3156	1.01993	1.17346	0.86917	0.384754	0.999937	ENSG00000255644	AC010185.1
ENSG00000184350.11	12.3189	0.807292	1.07891	0.748249	0.45431	0.999937	ENSG00000184350	MRGPRE
ENSG00000178150.10	12.3236	-0.562347	1.27434	-0.441284	0.659007	0.999937	ENSG00000178150	ZNF114
ENSG00000134343.14	12.3253	-0.556585	1.573	-0.353836	0.723462	0.999937	ENSG00000134343	ANO3
ENSG00000178623.12	12.3256	-0.441432	1.08292	-0.407633	0.683543	0.999937	ENSG00000178623	GPR35
ENSG00000257771.6	12.329	3.09875	1.58609	1.95371	0.0507361	0.999937	ENSG00000257771	LINC02395
ENSG00000255559.1	12.3303	1.29866	1.12107	1.15842	0.246694	0.999937	ENSG00000255559	ZNF252P-AS1
ENSG00000255310.2	12.3393	0.342826	1.10611	0.309939	0.756607	0.999937	ENSG00000255310	AF131215.5
ENSG00000171658.8	12.3507	0.529156	1.14993	0.460162	0.6454	0.999937	ENSG00000171658	NMRAL2P
ENSG00000225868.7	12.3521	0.354831	1.09371	0.324429	0.745613	0.999937	ENSG00000225868	AC016582.1
ENSG00000183831.7	12.3657	0.899426	1.15362	0.779655	0.435594	0.999937	ENSG00000183831	ANKRD45
ENSG00000286391.1	12.3721	0.467593	1.19337	0.391827	0.695186	0.999937	ENSG00000286391	AL592078.2
ENSG00000112562.19	12.3726	0.632355	1.1707	0.540149	0.589094	0.999937	ENSG00000112562	SMOC2
ENSG00000160307.10	12.3814	-0.0602617	1.07643	-0.055983	0.955355	0.999937	ENSG00000160307	S100B
ENSG00000006128.12	12.3869	0.581888	1.11611	0.521354	0.60212	0.999937	ENSG00000006128	TAC1
ENSG00000165799.5	12.3911	0.280011	1.28898	0.217235	0.828025	0.999937	ENSG00000165799	RNASE7
ENSG00000270049.3	12.3967	-0.0290089	1.11926	-0.025918	0.979323	0.999937	ENSG00000270049	AC009061.2
ENSG00000236333.4	12.3977	4.1961	1.50232	2.79308	0.00522093	0.999937	ENSG00000236333	TRHDE-AS1
ENSG00000167992.13	12.4002	0.311392	1.24137	0.250845	0.801934	0.999937	ENSG00000167992	VWCE
ENSG00000183578.8	12.4034	-0.126863	1.07883	-0.117594	0.90639	0.999937	ENSG00000183578	TNFAIP8L3
ENSG00000277324.1	12.4081	-0.0522149	1.06072	-0.0492259	0.960739	0.999937	ENSG00000277324	AC093462.1
ENSG00000177464.5	12.4093	2.21231	1.40357	1.5762	0.114979	0.999937	ENSG00000177464	GPR4
ENSG00000224609.8	12.4132	1.26779	1.23935	1.02295	0.306331	0.999937	ENSG00000224609	HSD52
ENSG00000005513.10	12.4147	0.521076	1.35345	0.384998	0.700239	0.999937	ENSG00000005513	SOX8
ENSG00000228486.10	12.4185	-0.716704	1.08521	-0.660431	0.508977	0.999937	ENSG00000228486	C2orf92
ENSG00000226864.2	12.419	0.161948	1.1021	0.146945	0.883175	0.999937	ENSG00000226864	ATE1-AS1
ENSG00000259448.3	12.4228	0.852155	1.2076	0.705662	0.480399	0.999937	ENSG00000259448	LINC02352
ENSG00000168453.15	12.4258	2.9526	1.4192	2.08047	0.0374827	0.999937	ENSG00000168453	HR
ENSG00000254876.5	12.4278	-1.09958	1.09192	-1.00702	0.313926	0.999937	ENSG00000254876	SUGT1P4-STRA6LP
ENSG00000100433.16	12.4291	0.724627	1.10402	0.656355	0.511596	0.999937	ENSG00000100433	KCNK10
ENSG00000279742.1	12.4318	2.83863	1.34366	2.11261	0.0346341	0.999937	ENSG00000279742	AP000974.1
ENSG00000274015.2	12.4318	1.10281	1.17519	0.938416	0.348031	0.999937	ENSG00000274015	AL136038.7
ENSG00000165923.16	12.4433	1.24156	1.06963	1.16074	0.245748	0.999937	ENSG00000165923	AGBL2
ENSG00000287650.1	12.4478	0.42263	1.07818	0.391984	0.69507	0.999937	ENSG00000287650	AL390071.1
ENSG00000213700.3	12.448	0.536357	1.08659	0.493616	0.621577	0.999937	ENSG00000213700	RPL17P50
ENSG00000012124.17	12.4497	1.06005	1.19762	0.885125	0.376089	0.999937	ENSG00000012124	CD22
ENSG00000203761.5	12.4508	-2.6928	1.24492	-2.16302	0.0305395	0.999937	ENSG00000203761	MSTO2P
ENSG00000273145.1	12.4522	-0.518632	1.07905	-0.480637	0.630774	0.999937	ENSG00000273145	BX537318.1
ENSG00000279029.1	12.4629	0.503861	1.13642	0.443377	0.657493	0.999937	ENSG00000279029	AL353583.1
ENSG00000278177.1	12.4665	0.100804	1.15238	0.0874743	0.930295	0.999937	ENSG00000278177	AL354811.1
ENSG00000141338.14	12.4681	3.51423	1.32497	2.65231	0.00799431	0.999937	ENSG00000141338	ABCA8
ENSG00000224957.6	12.4728	1.01095	1.13933	0.887319	0.374907	0.999937	ENSG00000224957	LINC01266
ENSG00000249917.3	12.473	0.153013	1.21279	0.126167	0.8996	0.999937	ENSG00000249917	LINC00536
ENSG00000187922.14	12.4775	0.985756	1.10108	0.895262	0.370647	0.999937	ENSG00000187922	LCN10
ENSG00000287900.1	12.4846	1.17277	1.14501	1.02424	0.305721	0.999937	ENSG00000287900	AC061961.1
ENSG00000184986.11	12.4873	0.633513	1.19995	0.527949	0.597535	0.999937	ENSG00000184986	TMEM121
ENSG00000282164.3	12.4885	-0.0931884	1.14544	-0.0813558	0.935159	0.999937	ENSG00000282164	PEG13
ENSG00000186645.9	12.4889	2.23032	1.38674	1.60832	0.107766	0.999937	ENSG00000186645	SPDYE17
ENSG00000153012.12	12.4935	1.30161	1.11234	1.17015	0.241939	0.999937	ENSG00000153012	LGI2
ENSG00000165730.16	12.494	2.21947	1.13025	1.9637	0.0495652	0.999937	ENSG00000165730	STOX1
ENSG00000133454.16	12.494	1.23288	1.24638	0.989167	0.322581	0.999937	ENSG00000133454	MYO18B
ENSG00000286681.1	12.5004	-1.08255	1.24451	-0.869854	0.38438	0.999937	ENSG00000286681	AF235103.3
ENSG00000287133.1	12.511	0.718911	1.10311	0.651711	0.514587	0.999937	ENSG00000287133	AC007279.1
ENSG00000255874.2	12.5136	0.150949	1.14419	0.131926	0.895042	0.999937	ENSG00000255874	PRECSIT
ENSG00000288076.1	12.5177	-0.354773	1.09864	-0.32292	0.746756	0.999937	ENSG00000288076	AC018398.1
ENSG00000240350.3	12.5179	0.909009	1.11515	0.815147	0.414988	0.999937	ENSG00000240350	SOCAR
ENSG00000276185.1	12.52	-0.0655783	1.07584	-0.0609556	0.951395	0.999937	ENSG00000276185	AC005045.2
ENSG00000223969.6	12.5244	0.208506	1.17123	0.178023	0.858705	0.999937	ENSG00000223969	AC002456.1
ENSG00000204970.10	12.5245	2.28025	1.27128	1.79366	0.0728677	0.999937	ENSG00000204970	PCDHA1
ENSG00000169668.11	12.5249	2.55489	1.23987	2.06061	0.0393401	0.999937	ENSG00000169668	BCRP2
ENSG00000145113.22	12.5251	1.20814	1.18102	1.02296	0.306326	0.999937	ENSG00000145113	MUC4
ENSG00000064989.13	12.5292	0.564252	1.1012	0.512396	0.608374	0.999937	ENSG00000064989	CALCRL
ENSG00000264324.1	12.531	0.120814	1.20263	0.100458	0.919981	0.999937	ENSG00000264324	AC006030.1
ENSG00000273259.3	12.5317	0.131828	1.06249	0.124074	0.901256	0.999937	ENSG00000273259	AL049839.2
ENSG00000272688.1	12.5335	-0.297954	1.07939	-0.27604	0.782517	0.999937	ENSG00000272688	AP005329.3
ENSG00000273143.2	12.5452	-0.482942	1.08145	-0.44657	0.655185	0.999937	ENSG00000273143	AL355512.1
ENSG00000280234.1	12.5474	-0.252376	1.0736	-0.235074	0.814151	0.999937	ENSG00000280234	AC124303.2
ENSG00000184675.11	12.5617	0.204536	1.07948	0.189477	0.849719	0.999937	ENSG00000184675	AMER1
ENSG00000285763.1	12.5621	0.88355	1.1305	0.781554	0.434477	0.999937	ENSG00000285763	AL358777.3
ENSG00000284773.1	12.5642	1.47313	1.14352	1.28824	0.197661	0.999937	ENSG00000284773	AC114490.3
ENSG00000224687.2	12.5693	0.172107	1.07886	0.159527	0.873254	0.999937	ENSG00000224687	RASAL2-AS1
ENSG00000160469.17	12.5712	0.741742	1.10318	0.672365	0.501352	0.999937	ENSG00000160469	BRSK1
ENSG00000272031.3	12.5722	0.57459	1.17358	0.489604	0.624414	0.999937	ENSG00000272031	ANKRD34A
ENSG00000262587.2	12.5728	-0.0374302	1.07147	-0.0349336	0.972133	0.999937	ENSG00000262587	AC133552.2
ENSG00000152669.9	12.5754	0.383898	1.09379	0.350981	0.725603	0.999937	ENSG00000152669	CCNO
ENSG00000177508.12	12.5835	1.26169	1.08973	1.1578	0.246945	0.999937	ENSG00000177508	IRX3
ENSG00000162227.8	12.5842	0.890131	1.06532	0.835553	0.403407	0.999937	ENSG00000162227	TAF6L
ENSG00000142494.13	12.5889	1.21963	1.2789	0.953655	0.340258	0.999937	ENSG00000142494	SLC47A1
ENSG00000125462.18	12.5907	0.84868	1.19627	0.709437	0.478053	0.999937	ENSG00000125462	C1orf61
ENSG00000253194.2	12.5961	0.096031	1.09333	0.0878332	0.930009	0.999937	ENSG00000253194	AL137009.1
ENSG00000135437.10	12.5968	1.60255	1.23046	1.3024	0.192779	0.999937	ENSG00000135437	RDH5
ENSG00000265142.9	12.6078	-0.765723	1.06213	-0.720929	0.470953	0.999937	ENSG00000265142	MIR133A1HG
ENSG00000160323.18	12.6093	0.597889	1.10012	0.543478	0.586801	0.999937	ENSG00000160323	ADAMTS13
ENSG00000111664.11	12.6112	0.281557	1.09035	0.258227	0.796232	0.999937	ENSG00000111664	GNB3
ENSG00000163017.14	12.612	0.528137	1.07002	0.493575	0.621606	0.999937	ENSG00000163017	ACTG2
ENSG00000146005.4	12.6174	-0.0914496	1.43807	-0.0635917	0.949295	0.999937	ENSG00000146005	PSD2
ENSG00000203808.12	12.62	0.843596	1.06572	0.791571	0.428611	0.999937	ENSG00000203808	BVES-AS1
ENSG00000283897.2	12.6234	0.0911445	1.06409	0.0856547	0.931741	0.999937	ENSG00000283897	AC011416.3
ENSG00000145020.16	12.6295	1.30842	1.08914	1.20134	0.22962	0.999937	ENSG00000145020	AMT
ENSG00000279432.1	12.6407	0.32279	1.10238	0.292812	0.769666	0.999937	ENSG00000279432	AC015799.1
ENSG00000183153.7	12.641	0.399769	1.12577	0.355106	0.72251	0.999937	ENSG00000183153	GJD3
ENSG00000270123.4	12.6603	3.13963	3.92074	0.800775	0.423262	0.999937	ENSG00000270123	VTRNA2-1
ENSG00000196932.12	12.6613	0.842611	1.29911	0.648606	0.516593	0.999937	ENSG00000196932	TMEM26
ENSG00000196811.13	12.6617	1.60769	1.18064	1.36171	0.173289	0.999937	ENSG00000196811	CHRNG
ENSG00000262791.1	12.6686	0.582952	1.08374	0.537909	0.59064	0.999937	ENSG00000262791	AC130343.1
ENSG00000176692.8	12.6746	2.17782	1.30923	1.66343	0.0962264	0.999937	ENSG00000176692	FOXC2
ENSG00000258744.2	12.6765	0.884908	1.2047	0.734546	0.462616	0.999937	ENSG00000258744	AL132800.1
ENSG00000230262.8	12.6821	2.03163	1.10951	1.83111	0.0670844	0.999937	ENSG00000230262	LINC02603
ENSG00000164796.18	12.6966	2.2086	1.30406	1.69363	0.0903356	0.999937	ENSG00000164796	CSMD3
ENSG00000253485.2	12.7006	-0.00665894	1.08727	-0.00612447	0.995113	0.999937	ENSG00000253485	PCDHGA5
ENSG00000261512.2	12.7045	-2.14415	1.33275	-1.60881	0.107657	0.999937	ENSG00000261512	AC092368.3
ENSG00000229153.5	12.7054	0.892085	1.06141	0.84047	0.400645	0.999937	ENSG00000229153	EPHA1-AS1
ENSG00000171357.6	12.7059	1.30878	1.29572	1.01007	0.312459	0.999937	ENSG00000171357	LURAP1
ENSG00000269982.1	12.7105	0.369998	1.09491	0.337925	0.73542	0.999937	ENSG00000269982	AC018809.2
ENSG00000242220.9	12.7129	0.776236	1.27499	0.608816	0.542646	0.999937	ENSG00000242220	TCP10L
ENSG00000137699.17	12.7158	0.255399	1.42115	0.179713	0.857378	0.999937	ENSG00000137699	TRIM29
ENSG00000246763.7	12.7194	0.782255	1.109	0.705371	0.480579	0.999937	ENSG00000246763	RGMB-AS1
ENSG00000259727.1	12.7211	1.4517	1.31006	1.10812	0.267812	0.999937	ENSG00000259727	AC103740.2
ENSG00000286760.1	12.7232	0.346704	1.04809	0.330797	0.740798	0.999937	ENSG00000286760	AL022069.3
ENSG00000260372.7	12.7243	0.349694	1.09416	0.319602	0.74927	0.999937	ENSG00000260372	AQP4-AS1
ENSG00000186481.16	12.7257	-0.924593	1.10452	-0.837102	0.402535	0.999937	ENSG00000186481	ANKRD20A5P
ENSG00000223697.3	12.7268	-0.158586	1.06752	-0.148556	0.881904	0.999937	ENSG00000223697	AF230666.1
ENSG00000277369.1	12.7269	0.0342118	1.0468	0.0326823	0.973928	0.999937	ENSG00000277369	AC010654.1
ENSG00000286742.1	12.7392	0.126827	1.06315	0.119293	0.905043	0.999937	ENSG00000286742	AC000065.1
ENSG00000142583.18	12.74	0.754032	1.25652	0.600096	0.548442	0.999937	ENSG00000142583	SLC2A5
ENSG00000270804.1	12.7546	1.29479	1.10043	1.17662	0.239347	0.999937	ENSG00000270804	AC010326.4
ENSG00000169896.18	12.7571	2.4963	1.23182	2.02652	0.0427117	0.999937	ENSG00000169896	ITGAM
ENSG00000244560.7	12.7577	0.710374	1.05159	0.675521	0.499345	0.999937	ENSG00000244560	AC004890.2
ENSG00000180440.4	12.762	0.625792	1.09036	0.57393	0.566015	0.999937	ENSG00000180440	SERTM1
ENSG00000239791.2	12.7645	-0.204366	1.0931	-0.18696	0.851692	0.999937	ENSG00000239791	AC002310.2
ENSG00000271943.2	12.7671	-0.213997	1.05282	-0.203262	0.838931	0.999937	ENSG00000271943	AC098614.2
ENSG00000249853.7	12.7717	1.8032	1.16104	1.55309	0.120403	0.999937	ENSG00000249853	HS3ST5
ENSG00000167646.14	12.7729	-1.40794	1.12817	-1.24798	0.212039	0.999937	ENSG00000167646	DNAAF3
ENSG00000149503.13	12.7792	0.539275	1.08806	0.495631	0.620155	0.999937	ENSG00000149503	INCENP
ENSG00000275120.3	12.7794	-0.213426	1.05723	-0.201872	0.840017	0.999937	ENSG00000275120	AC048382.5
ENSG00000255467.1	12.7889	-1.18728	1.1428	-1.03892	0.298842	0.999937	ENSG00000255467	AP002433.1
ENSG00000281383.1	12.7947	0.603173	1.14628	0.526201	0.598748	0.999937	ENSG00000281383	FP671120.7
ENSG00000166664.14	12.8014	0.194364	1.23059	0.157944	0.874501	0.999937	ENSG00000166664	CHRFAM7A
ENSG00000081138.14	12.8033	1.24206	1.3753	0.903122	0.366461	0.999937	ENSG00000081138	CDH7
ENSG00000188596.11	12.8065	1.66847	1.16603	1.4309	0.15246	0.999937	ENSG00000188596	CFAP54
ENSG00000128408.9	12.8087	0.799228	1.14673	0.696962	0.485827	0.999937	ENSG00000128408	RIBC2
ENSG00000196620.10	12.8111	2.47147	1.24136	1.99094	0.0464874	0.999937	ENSG00000196620	UGT2B15
ENSG00000281731.3	12.813	-0.0916893	1.2745	-0.0719414	0.942649	0.999937	ENSG00000281731	METTL14-DT
ENSG00000186907.8	12.8181	1.08035	1.14437	0.94406	0.345139	0.999937	ENSG00000186907	RTN4RL2
ENSG00000204071.10	12.8214	0.725025	1.06245	0.682408	0.494981	0.999937	ENSG00000204071	TCEAL6
ENSG00000181798.3	12.8318	-0.145638	1.1275	-0.129169	0.897224	0.999937	ENSG00000181798	LINC00471
ENSG00000152931.9	12.833	1.6124	1.12937	1.42771	0.153376	0.999937	ENSG00000152931	PART1
ENSG00000106013.15	12.8354	0.440564	1.17766	0.374102	0.708329	0.999937	ENSG00000106013	ANKRD7
ENSG00000212127.6	12.8367	0.543011	1.08679	0.499645	0.617325	0.999937	ENSG00000212127	TAS2R14
ENSG00000271789.1	12.839	-0.754798	1.07435	-0.70256	0.48233	0.999937	ENSG00000271789	AL080317.1
ENSG00000254017.1	12.8426	-0.198289	1.09392	-0.181265	0.85616	0.999937	ENSG00000254017	IGHEP2
ENSG00000163406.11	12.8435	-0.28023	1.26517	-0.221496	0.824706	0.999937	ENSG00000163406	SLC15A2
ENSG00000184144.12	12.8445	1.68995	1.28885	1.31121	0.189786	0.999937	ENSG00000184144	CNTN2
ENSG00000215548.2	12.8667	-0.663131	1.06834	-0.620709	0.534791	0.999937	ENSG00000215548	FRG1JP
ENSG00000111341.10	12.8688	-0.535581	1.0898	-0.49145	0.623108	0.999937	ENSG00000111341	MGP
ENSG00000023839.12	12.8716	-0.27928	1.09362	-0.255371	0.798437	0.999937	ENSG00000023839	ABCC2
ENSG00000263171.1	12.8718	0.87056	1.09863	0.792404	0.428125	0.999937	ENSG00000263171	AC026954.3
ENSG00000174502.19	12.88	1.10568	1.2615	0.876475	0.380772	0.999937	ENSG00000174502	SLC26A9
ENSG00000254551.1	12.8871	-0.0882941	1.06622	-0.0828103	0.934002	0.999937	ENSG00000254551	AP000873.3
ENSG00000197893.14	12.8908	1.36864	1.11161	1.23122	0.218239	0.999937	ENSG00000197893	NRAP
ENSG00000261329.6	12.8979	0.327719	1.24358	0.26353	0.792142	0.999937	ENSG00000261329	AC016597.1
ENSG00000135346.9	12.905	-0.478398	1.10398	-0.43334	0.664768	0.999937	ENSG00000135346	CGA
ENSG00000284906.2	12.9075	0.367445	1.24003	0.296321	0.766985	0.999937	ENSG00000284906	AC091057.6
ENSG00000085465.13	12.91	0.135337	1.06738	0.126793	0.899104	0.999937	ENSG00000085465	OVGP1
ENSG00000233579.1	12.9149	-0.0365921	1.09156	-0.0335228	0.973258	0.999937	ENSG00000233579	KRT8P15
ENSG00000188573.8	12.9172	1.24323	1.054	1.17954	0.238185	0.999937	ENSG00000188573	FBLL1
ENSG00000166558.11	12.9203	-0.0365447	1.05868	-0.0345191	0.972463	0.999937	ENSG00000166558	SLC38A8
ENSG00000260220.7	12.9303	0.834233	1.10622	0.754132	0.45077	0.999937	ENSG00000260220	CCDC187
ENSG00000183032.12	12.9305	0.776722	1.08195	0.717891	0.472824	0.999937	ENSG00000183032	SLC25A21
ENSG00000230337.1	12.9309	0.506119	1.11776	0.452797	0.650695	0.999937	ENSG00000230337	EXOSC10-AS1
ENSG00000228061.7	12.9311	-0.0737364	1.06521	-0.0692225	0.944813	0.999937	ENSG00000228061	AC131571.1
ENSG00000165409.17	12.9315	1.6114	1.11479	1.44547	0.148325	0.999937	ENSG00000165409	TSHR
ENSG00000259436.1	12.9362	-0.935778	1.2092	-0.773879	0.439002	0.999937	ENSG00000259436	AC010247.2
ENSG00000272159.1	12.9397	0.299902	1.07748	0.278336	0.780754	0.999937	ENSG00000272159	AC087623.3
ENSG00000272556.2	12.9407	2.17112	1.24815	1.73947	0.0819513	0.999937	ENSG00000272556	GTF2IP13
ENSG00000235092.6	12.9441	-1.03403	1.11694	-0.925772	0.354565	0.999937	ENSG00000235092	ID2-AS1
ENSG00000158008.10	12.9466	1.53289	1.20315	1.27406	0.202641	0.999937	ENSG00000158008	EXTL1
ENSG00000227827.3	12.9483	3.65187	1.53623	2.37715	0.0174468	0.999937	ENSG00000227827	AC138969.2
ENSG00000157782.9	12.9552	2.10909	1.21692	1.73314	0.0830711	0.999937	ENSG00000157782	CABP1
ENSG00000204176.14	12.956	0.545062	1.14659	0.475378	0.634517	0.999937	ENSG00000204176	SYT15
ENSG00000092377.15	12.9594	0.837114	1.06411	0.786679	0.43147	0.999937	ENSG00000092377	TBL1Y
ENSG00000107742.13	12.9628	0.0568575	1.06002	0.0536383	0.957223	0.999937	ENSG00000107742	SPOCK2
ENSG00000100626.17	12.9737	0.147845	1.31237	0.112655	0.910304	0.999937	ENSG00000100626	GALNT16
ENSG00000170044.8	12.974	-0.319501	1.0625	-0.300707	0.763638	0.999937	ENSG00000170044	ZPLD1
ENSG00000279406.1	12.9756	0.407934	1.0789	0.378102	0.705355	0.999937	ENSG00000279406	AL359183.1
ENSG00000115353.11	12.9795	0.870402	1.13765	0.76509	0.444218	0.999937	ENSG00000115353	TACR1
ENSG00000232063.2	12.9847	0.750143	1.07898	0.695231	0.48691	0.999937	ENSG00000232063	AL691447.2
ENSG00000215018.10	12.9852	0.641118	1.17295	0.546588	0.584662	0.999937	ENSG00000215018	COL28A1
ENSG00000242396.1	12.9975	-0.511219	1.09817	-0.46552	0.641559	0.999937	ENSG00000242396	AC096536.2
ENSG00000167748.11	12.9976	1.13636	1.22533	0.92739	0.353724	0.999937	ENSG00000167748	KLK1
ENSG00000134461.16	13.0007	0.403904	1.064	0.37961	0.704235	0.999937	ENSG00000134461	ANKRD16
ENSG00000112394.17	13.0077	-0.375238	1.24938	-0.300338	0.763919	0.999937	ENSG00000112394	SLC16A10
ENSG00000240240.9	13.0111	1.2557	1.19077	1.05453	0.291642	0.999937	ENSG00000240240	BX664727.3
ENSG00000261611.6	13.0149	-2.54914	1.21525	-2.09763	0.0359375	0.999937	ENSG00000261611	AC010547.4
ENSG00000173200.13	13.0283	0.74872	1.27212	0.588561	0.556156	0.999937	ENSG00000173200	PARP15
ENSG00000136542.9	13.0354	-1.05828	1.21475	-0.871193	0.383649	0.999937	ENSG00000136542	GALNT5
ENSG00000115194.11	13.0462	0.871315	1.1936	0.729988	0.465398	0.999937	ENSG00000115194	SLC30A3
ENSG00000168477.19	13.0492	0.787964	1.21414	0.64899	0.516345	0.999937	ENSG00000168477	TNXB
ENSG00000217165.1	13.0524	-0.141956	1.0502	-0.13517	0.892478	0.999937	ENSG00000217165	ANKRD18EP
ENSG00000171199.11	13.0589	2.64006	1.5009	1.75898	0.0785802	0.999937	ENSG00000171199	OPRPN
ENSG00000273471.1	13.0755	0.0289783	1.30586	0.0221909	0.982296	0.999937	ENSG00000273471	AC112229.4
ENSG00000102057.10	13.0797	0.314807	1.06187	0.296466	0.766875	0.999937	ENSG00000102057	KCND1
ENSG00000134516.18	13.082	1.07262	1.09699	0.977784	0.328181	0.999937	ENSG00000134516	DOCK2
ENSG00000226696.6	13.0945	0.301849	1.06179	0.284283	0.776193	0.999937	ENSG00000226696	LENG8-AS1
ENSG00000167613.16	13.0985	1.53992	1.36188	1.13073	0.258168	0.999937	ENSG00000167613	LAIR1
ENSG00000188501.11	13.101	0.805758	1.06251	0.758356	0.448238	0.999937	ENSG00000188501	LCTL
ENSG00000115598.10	13.1088	-0.520486	1.07705	-0.483251	0.628918	0.999937	ENSG00000115598	IL1RL2
ENSG00000217416.4	13.1127	0.119679	1.26289	0.0947657	0.924501	0.999937	ENSG00000217416	ISCA1P1
ENSG00000285000.1	13.1182	-6.46228	3.91263	-1.65165	0.0986065	0.999937	ENSG00000285000	AC008581.2
ENSG00000042980.13	13.121	-0.582248	1.18696	-0.490538	0.623754	0.999937	ENSG00000042980	ADAM28
ENSG00000284624.1	13.128	1.00065	1.10622	0.904564	0.365696	0.999937	ENSG00000284624	AC092902.4
ENSG00000286729.1	13.1339	0.241324	1.04421	0.231106	0.817233	0.999937	ENSG00000286729	AC137695.3
ENSG00000266903.2	13.136	1.91212	1.0748	1.77905	0.0752318	0.999937	ENSG00000266903	AC243964.3
ENSG00000157570.12	13.1366	0.933257	1.16227	0.802959	0.421999	0.999937	ENSG00000157570	TSPAN18
ENSG00000261596.2	13.1405	0.411312	1.07291	0.383362	0.701451	0.999937	ENSG00000261596	AC005632.3
ENSG00000213967.11	13.1415	1.17972	1.19955	0.983467	0.325378	0.999937	ENSG00000213967	ZNF726
ENSG00000285646.2	13.1493	0.160836	1.20542	0.133427	0.893855	0.999937	ENSG00000285646	AL021155.4
ENSG00000183960.9	13.1545	-0.451224	1.05934	-0.425948	0.670145	0.999937	ENSG00000183960	KCNH8
ENSG00000238186.1	13.1572	0.305385	1.05829	0.288565	0.772915	0.999937	ENSG00000238186	AL603839.2
ENSG00000280219.1	13.162	1.29717	1.10273	1.17633	0.239464	0.999937	ENSG00000280219	AC093908.1
ENSG00000271737.1	13.1623	0.0608986	1.11043	0.0548423	0.956264	0.999937	ENSG00000271737	AC008608.2
ENSG00000267317.2	13.167	0.079796	1.05479	0.0756513	0.939697	0.999937	ENSG00000267317	AC027307.2
ENSG00000264895.1	13.1671	-0.268405	1.03504	-0.259319	0.795389	0.999937	ENSG00000264895	AC006141.1
ENSG00000136425.14	13.1693	1.14974	1.18139	0.973205	0.330451	0.999937	ENSG00000136425	CIB2
ENSG00000080007.8	13.1747	0.307152	1.12008	0.274223	0.783913	0.999937	ENSG00000080007	DDX43
ENSG00000223343.1	13.1756	0.29024	1.03996	0.279087	0.780178	0.999937	ENSG00000223343	AC137630.1
ENSG00000284543.1	13.176	0.466478	1.40783	0.331345	0.740384	0.999937	ENSG00000284543	LINC01226
ENSG00000260304.1	13.1767	-0.746695	1.08079	-0.690879	0.489641	0.999937	ENSG00000260304	AC009088.2
ENSG00000235663.1	13.18	0.40801	1.07887	0.378184	0.705294	0.999937	ENSG00000235663	SAPCD1-AS1
ENSG00000268886.1	13.1957	0.566058	1.11285	0.508655	0.610994	0.999937	ENSG00000268886	AC022150.1
ENSG00000112599.9	13.198	0.872794	1.18757	0.734941	0.462375	0.999937	ENSG00000112599	GUCA1B
ENSG00000279417.1	13.2016	1.80425	1.367	1.31986	0.186881	0.999937	ENSG00000279417	AC019322.4
ENSG00000284830.1	13.2084	0.806171	1.10138	0.731967	0.464188	0.999937	ENSG00000284830	AL049557.1
ENSG00000080166.16	13.2088	-0.969954	1.14966	-0.84369	0.398843	0.999937	ENSG00000080166	DCT
ENSG00000270504.1	13.222	0.739742	1.05066	0.704073	0.481388	0.999937	ENSG00000270504	AL391422.4
ENSG00000105737.9	13.2237	0.73998	1.06166	0.697004	0.4858	0.999937	ENSG00000105737	GRIK5
ENSG00000286950.1	13.2273	-0.65554	1.05121	-0.623605	0.532887	0.999937	ENSG00000286950	AC087588.3
ENSG00000079841.18	13.2281	3.17443	1.32866	2.3892	0.0168852	0.999937	ENSG00000079841	RIMS1
ENSG00000010282.15	13.236	-0.226688	1.04954	-0.215987	0.828998	0.999937	ENSG00000010282	HHATL
ENSG00000272558.1	13.242	-0.309226	1.06759	-0.289648	0.772085	0.999937	ENSG00000272558	U91328.2
ENSG00000287401.1	13.2453	0.587452	1.08634	0.540764	0.588671	0.999937	ENSG00000287401	AC034139.1
ENSG00000145536.15	13.2499	-0.297193	1.05482	-0.281747	0.778137	0.999937	ENSG00000145536	ADAMTS16
ENSG00000078328.22	13.2598	1.64798	1.1969	1.37688	0.168549	0.999937	ENSG00000078328	RBFOX1
ENSG00000171502.15	13.2647	3.35181	1.38363	2.42248	0.015415	0.999937	ENSG00000171502	COL24A1
ENSG00000257596.1	13.2697	0.977507	1.09744	0.890716	0.373082	0.999937	ENSG00000257596	SCAT2
ENSG00000269910.1	13.274	-0.438773	1.07359	-0.408697	0.682762	0.999937	ENSG00000269910	AL049840.4
ENSG00000286545.1	13.2805	-0.370947	1.04254	-0.35581	0.721983	0.999937	ENSG00000286545	AC092645.2
ENSG00000130518.17	13.2859	-0.714275	1.15982	-0.61585	0.537994	0.999937	ENSG00000130518	IQCN
ENSG00000148377.6	13.286	0.919312	1.1004	0.835431	0.403475	0.999937	ENSG00000148377	IDI2
ENSG00000251493.5	13.2889	3.51439	1.33169	2.63905	0.0083138	0.999937	ENSG00000251493	FOXD1
ENSG00000127507.18	13.2941	-0.000204318	1.38609	-0.000147406	0.999882	0.999937	ENSG00000127507	ADGRE2
ENSG00000234028.3	13.297	-0.313064	1.09745	-0.285266	0.77544	0.999937	ENSG00000234028	EIF2AK3-DT
ENSG00000261351.2	13.2972	0.530963	1.08886	0.487633	0.62581	0.999937	ENSG00000261351	AC116913.1
ENSG00000286032.1	13.2984	4.08296	1.49836	2.72496	0.006431	0.999937	ENSG00000286032	FP236383.6
ENSG00000286340.1	13.3077	0.620587	1.0669	0.581671	0.560788	0.999937	ENSG00000286340	AL356776.2
ENSG00000138083.5	13.3111	0.632125	1.07804	0.586365	0.55763	0.999937	ENSG00000138083	SIX3
ENSG00000157103.12	13.3119	1.2993	1.1109	1.16959	0.242165	0.999937	ENSG00000157103	SLC6A1
ENSG00000236283.5	13.3137	-0.740756	1.14583	-0.646479	0.517969	0.999937	ENSG00000236283	AC019197.1
ENSG00000254556.1	13.3187	-0.293613	1.05553	-0.278167	0.780884	0.999937	ENSG00000254556	AF131215.2
ENSG00000124191.18	13.3337	1.0084	1.10604	0.911722	0.361915	0.999937	ENSG00000124191	TOX2
ENSG00000275180.1	13.3362	1.55626	1.07588	1.4465	0.148038	0.999937	ENSG00000275180	AC048341.2
ENSG00000224429.8	13.338	-0.335196	1.10073	-0.304522	0.76073	0.999937	ENSG00000224429	LINC00539
ENSG00000110881.12	13.3472	1.52589	1.06168	1.43724	0.15065	0.999937	ENSG00000110881	ASIC1
ENSG00000102468.10	13.3526	1.39674	1.30451	1.07071	0.284302	0.999937	ENSG00000102468	HTR2A
ENSG00000239415.1	13.3536	1.31351	1.06104	1.23795	0.215735	0.999937	ENSG00000239415	AP001469.3
ENSG00000233143.2	13.3541	0.876178	1.11137	0.788378	0.430476	0.999937	ENSG00000233143	DIRC3-AS1
ENSG00000008516.17	13.3551	0.636207	1.03798	0.61293	0.539922	0.999937	ENSG00000008516	MMP25
ENSG00000242294.6	13.3552	0.450022	1.08118	0.416231	0.677241	0.999937	ENSG00000242294	STAG3L5P
ENSG00000287933.1	13.3586	-0.0221752	1.19075	-0.0186228	0.985142	0.999937	ENSG00000287933	AL357141.1
ENSG00000141449.14	13.3629	0.305746	1.11539	0.274114	0.783997	0.999937	ENSG00000141449	GREB1L
ENSG00000261094.2	13.3845	1.86935	1.09552	1.70635	0.087942	0.999937	ENSG00000261094	AC007066.2
ENSG00000214827.11	13.3885	-0.695637	1.03737	-0.670579	0.502489	0.999937	ENSG00000214827	MTCP1
ENSG00000140015.20	13.3908	1.85507	1.34672	1.37747	0.168366	0.999937	ENSG00000140015	KCNH5
ENSG00000249359.3	13.3925	1.95608	1.36474	1.4333	0.151772	0.999937	ENSG00000249359	AC093274.1
ENSG00000279225.1	13.3933	0.245302	1.03977	0.23592	0.813495	0.999937	ENSG00000279225	AC138305.3
ENSG00000179133.15	13.3939	0.407783	1.10771	0.36813	0.712776	0.999937	ENSG00000179133	C10orf67
ENSG00000092607.15	13.395	0.91277	1.06237	0.859181	0.390241	0.999937	ENSG00000092607	TBX15
ENSG00000134207.17	13.4005	3.44006	1.19118	2.88794	0.00387775	0.999937	ENSG00000134207	SYT6
ENSG00000167768.4	13.4036	0.673006	1.51286	0.444857	0.656423	0.999937	ENSG00000167768	KRT1
ENSG00000103154.9	13.4079	-0.24085	1.06594	-0.22595	0.82124	0.999937	ENSG00000103154	NECAB2
ENSG00000253417.5	13.412	1.03551	1.20547	0.859013	0.390333	0.999937	ENSG00000253417	LINC02159
ENSG00000150594.7	13.4189	0.612831	1.07398	0.570616	0.56826	0.999937	ENSG00000150594	ADRA2A
ENSG00000111012.10	13.4248	-0.120945	1.04364	-0.115887	0.907742	0.999937	ENSG00000111012	CYP27B1
ENSG00000260412.1	13.4305	0.750138	1.05596	0.710382	0.477467	0.999937	ENSG00000260412	AL353746.1
ENSG00000176884.16	13.4319	3.75551	1.4122	2.65934	0.00782931	0.999937	ENSG00000176884	GRIN1
ENSG00000230091.6	13.4325	0.147483	1.06088	0.139019	0.889435	0.999937	ENSG00000230091	TMEM254-AS1
ENSG00000213221.5	13.4405	1.34435	1.12251	1.19762	0.231064	0.999937	ENSG00000213221	DNLZ
ENSG00000258376.2	13.4417	0.494712	1.05236	0.470097	0.638286	0.999937	ENSG00000258376	AC004846.1
ENSG00000168490.14	13.4438	-0.0887887	1.08465	-0.0818597	0.934758	0.999937	ENSG00000168490	PHYHIP
ENSG00000247121.7	13.4581	0.386935	1.07382	0.360336	0.718596	0.999937	ENSG00000247121	AC009126.1
ENSG00000272077.1	13.4583	0.767223	1.0517	0.729508	0.465691	0.999937	ENSG00000272077	AC124045.1
ENSG00000267125.2	13.4603	0.344455	1.04353	0.330087	0.741334	0.999937	ENSG00000267125	AC012615.3
ENSG00000184785.6	13.4635	1.05066	1.04232	1.00801	0.313452	0.999937	ENSG00000184785	SMIM10
ENSG00000288093.1	13.4638	0.483058	1.18821	0.406543	0.684344	0.999937	ENSG00000288093	AL592295.5
ENSG00000185972.6	13.4685	1.41952	1.07612	1.31912	0.187131	0.999937	ENSG00000185972	CCIN
ENSG00000112183.15	13.479	0.51385	1.03215	0.497843	0.618594	0.999937	ENSG00000112183	RBM24
ENSG00000279541.1	13.4831	-0.316518	1.10083	-0.287527	0.773709	0.999937	ENSG00000279541	AC005261.5
ENSG00000233271.1	13.4846	0.0178146	1.03364	0.0172348	0.986249	0.999937	ENSG00000233271	AL590440.1
ENSG00000266916.7	13.4936	0.625769	1.07637	0.58137	0.560991	0.999937	ENSG00000266916	ZNF793-AS1
ENSG00000267586.7	13.4975	0.218934	1.09055	0.200756	0.84089	0.999937	ENSG00000267586	LINC00907
ENSG00000164707.15	13.504	-1.16549	1.15136	-1.01228	0.311404	0.999937	ENSG00000164707	SLC13A4
ENSG00000226124.7	13.5044	0.615031	1.0415	0.590524	0.554839	0.999937	ENSG00000226124	FTCDNL1
ENSG00000140795.13	13.5053	3.63182	1.25598	2.89161	0.00383269	0.999937	ENSG00000140795	MYLK3
ENSG00000178803.12	13.5155	0.598642	1.04251	0.574232	0.565811	0.999937	ENSG00000178803	ADORA2A-AS1
ENSG00000213130.3	13.5156	0.843581	3.95355	0.213373	0.831036	0.999937	ENSG00000213130	EEF1DP5
ENSG00000226453.2	13.5179	0.589119	1.10097	0.535091	0.592587	0.999937	ENSG00000226453	LINC02542
ENSG00000122035.7	13.5189	1.52339	1.08338	1.40615	0.159681	0.999937	ENSG00000122035	RASL11A
ENSG00000169067.4	13.5254	-0.891882	1.19847	-0.744182	0.456767	0.999937	ENSG00000169067	ACTBL2
ENSG00000279267.1	13.5261	0.148892	1.04376	0.142649	0.886567	0.999937	ENSG00000279267	AL078621.1
ENSG00000231728.5	13.5272	1.08654	1.08258	1.00366	0.315543	0.999937	ENSG00000231728	TMSB15B-AS1
ENSG00000256422.6	13.5288	1.1347	1.12956	1.00455	0.315114	0.999937	ENSG00000256422	LINC02552
ENSG00000286214.1	13.5303	-0.367702	1.03156	-0.356451	0.721503	0.999937	ENSG00000286214	AUXG01000058.1
ENSG00000258653.3	13.5318	-0.912178	1.28214	-0.711447	0.476807	0.999937	ENSG00000258653	AC005520.1
ENSG00000162891.10	13.538	0.705657	1.29982	0.542889	0.587207	0.999937	ENSG00000162891	IL20
ENSG00000172404.5	13.5412	0.362533	1.02595	0.353365	0.723815	0.999937	ENSG00000172404	DNAJB7
ENSG00000262265.2	13.5419	0.342453	1.0647	0.321644	0.747722	0.999937	ENSG00000262265	AC002558.3
ENSG00000146192.15	13.5513	0.0412579	1.0792	0.03823	0.969504	0.999937	ENSG00000146192	FGD2
ENSG00000232415.1	13.5564	1.00586	1.08455	0.927443	0.353696	0.999937	ENSG00000232415	ELN-AS1
ENSG00000279495.1	13.5603	0.517218	1.08219	0.477935	0.632696	0.999937	ENSG00000279495	AL928654.4
ENSG00000279009.1	13.5844	1.42005	1.06258	1.33642	0.181412	0.999937	ENSG00000279009	AC005943.2
ENSG00000247950.7	13.5858	0.76699	1.07709	0.712097	0.476404	0.999937	ENSG00000247950	SEC24B-AS1
ENSG00000238072.1	13.5929	-6.29942	3.91508	-1.60901	0.107613	0.999937	ENSG00000238072	AC009244.1
ENSG00000254427.2	13.5975	-0.0192364	1.10054	-0.0174791	0.986054	0.999937	ENSG00000254427	LINC02696
ENSG00000256469.1	13.6006	-0.523851	1.04113	-0.503157	0.614854	0.999937	ENSG00000256469	AP002383.2
ENSG00000229419.1	13.6019	0.104134	1.09638	0.0949798	0.924331	0.999937	ENSG00000229419	RALGAPA1P1
ENSG00000226919.4	13.6041	-0.505103	1.09681	-0.460521	0.645142	0.999937	ENSG00000226919	AL365184.1
ENSG00000253873.6	13.6062	0.05493	1.09896	0.0499834	0.960136	0.999937	ENSG00000253873	PCDHGA11
ENSG00000099954.18	13.6086	0.0264038	1.19473	0.0221003	0.982368	0.999937	ENSG00000099954	CECR2
ENSG00000259802.1	13.6102	0.429472	1.02968	0.417094	0.67661	0.999937	ENSG00000259802	AC012640.2
ENSG00000287697.1	13.6115	0.148032	1.12833	0.131195	0.895621	0.999937	ENSG00000287697	Z99127.3
ENSG00000135736.6	13.6218	0.240768	1.03416	0.232816	0.815905	0.999937	ENSG00000135736	CCDC102A
ENSG00000164849.10	13.6243	-0.865162	1.06589	-0.811683	0.416974	0.999937	ENSG00000164849	GPR146
ENSG00000178776.5	13.6252	0.421503	1.03715	0.406404	0.684445	0.999937	ENSG00000178776	C5orf46
ENSG00000159905.15	13.626	-0.182399	1.03112	-0.176894	0.859592	0.999937	ENSG00000159905	ZNF221
ENSG00000006283.18	13.6319	0.99624	1.16988	0.851573	0.394451	0.999937	ENSG00000006283	CACNA1G
ENSG00000158270.12	13.6465	1.59477	1.16559	1.36821	0.171246	0.999937	ENSG00000158270	COLEC12
ENSG00000270605.1	13.6573	0.624958	1.09713	0.569629	0.568929	0.999937	ENSG00000270605	AL353622.1
ENSG00000286153.1	13.6672	0.181279	1.03301	0.175486	0.860697	0.999937	ENSG00000286153	AP000331.1
ENSG00000168939.12	13.6757	0.371537	1.12254	0.33098	0.74066	0.999937	ENSG00000168939	SPRY3
ENSG00000257135.7	13.676	-0.199434	1.20695	-0.165238	0.868757	0.999937	ENSG00000257135	ODC1-DT
ENSG00000138028.16	13.6768	0.267347	1.07165	0.249472	0.802995	0.999937	ENSG00000138028	CGREF1
ENSG00000101203.16	13.6798	3.22242	1.55271	2.07536	0.0379533	0.999937	ENSG00000101203	COL20A1
ENSG00000163491.16	13.685	1.35615	1.0624	1.27649	0.201782	0.999937	ENSG00000163491	NEK10
ENSG00000244733.5	13.6868	0.174075	1.02813	0.169313	0.86555	0.999937	ENSG00000244733	AL132656.2
ENSG00000229539.1	13.6886	0.159377	1.05838	0.150587	0.880302	0.999937	ENSG00000229539	PANK2-AS1
ENSG00000224416.2	13.692	-0.244588	1.31656	-0.185778	0.852619	0.999937	ENSG00000224416	IFNA22P
ENSG00000260083.2	13.6933	1.06112	1.03124	1.02898	0.303491	0.999937	ENSG00000260083	MIR762HG
ENSG00000279500.1	13.6965	-0.353444	1.0563	-0.334607	0.737922	0.999937	ENSG00000279500	AC108704.2
ENSG00000183914.14	13.7023	0.767946	1.15998	0.662036	0.507948	0.999937	ENSG00000183914	DNAH2
ENSG00000124549.14	13.7203	0.274152	1.02342	0.267877	0.788794	0.999937	ENSG00000124549	BTN2A3P
ENSG00000204241.8	13.7355	1.86095	1.16822	1.59298	0.111165	0.999937	ENSG00000204241	LINC02731
ENSG00000245281.8	13.7373	0.262726	1.17622	0.223365	0.823251	0.999937	ENSG00000245281	AC124242.1
ENSG00000259370.2	13.7407	1.47602	1.06141	1.39062	0.16434	0.999937	ENSG00000259370	AC103740.1
ENSG00000223403.6	13.743	0.670077	1.04804	0.639365	0.522586	0.999937	ENSG00000223403	MEG9
ENSG00000258458.8	13.7442	0.563117	1.08574	0.51865	0.604005	0.999937	ENSG00000258458	AL160314.2
ENSG00000007038.11	13.7495	0.896412	1.25192	0.716028	0.473974	0.999937	ENSG00000007038	PRSS21
ENSG00000269113.4	13.7517	0.879067	1.3345	0.658725	0.510072	0.999937	ENSG00000269113	TRABD2B
ENSG00000158055.16	13.758	1.48936	1.29665	1.14862	0.250714	0.999937	ENSG00000158055	GRHL3
ENSG00000113211.5	13.7616	1.14888	1.21012	0.949388	0.342423	0.999937	ENSG00000113211	PCDHB6
ENSG00000158423.17	13.7618	-0.386042	1.07704	-0.358429	0.720022	0.999937	ENSG00000158423	RIBC1
ENSG00000279905.1	13.7637	0.338655	1.02944	0.328969	0.742179	0.999937	ENSG00000279905	AC063926.3
ENSG00000258704.6	13.7739	-0.558774	1.02691	-0.544133	0.58635	0.999937	ENSG00000258704	SRP54-AS1
ENSG00000260807.7	13.7741	0.898429	1.06043	0.847228	0.396868	0.999937	ENSG00000260807	CEROX1
ENSG00000234690.7	13.7783	-0.359765	1.05096	-0.342321	0.73211	0.999937	ENSG00000234690	EPCAM-DT
ENSG00000105409.19	13.78	-0.0336819	1.0338	-0.0325806	0.974009	0.999937	ENSG00000105409	ATP1A3
ENSG00000273008.1	13.7887	-0.19614	1.0642	-0.184307	0.853772	0.999937	ENSG00000273008	AC010864.1
ENSG00000235033.7	13.7901	2.74251	1.18053	2.32312	0.0201726	0.999937	ENSG00000235033	DAAM2-AS1
ENSG00000198673.10	13.7935	-1.02647	1.07789	-0.952297	0.340946	0.999937	ENSG00000198673	TAFA2
ENSG00000186280.7	13.7952	-0.547206	1.05325	-0.51954	0.603384	0.999937	ENSG00000186280	KDM4D
ENSG00000203896.10	13.8027	0.118704	1.12918	0.105124	0.916277	0.999937	ENSG00000203896	LIME1
ENSG00000282994.1	13.8084	0.313615	1.18755	0.264085	0.791714	0.999937	ENSG00000282994	AC215524.1
ENSG00000229109.2	13.8181	1.02067	1.13274	0.901067	0.367553	0.999937	ENSG00000229109	AL137847.1
ENSG00000111834.13	13.83	0.298583	1.07071	0.278864	0.780349	0.999937	ENSG00000111834	RSPH4A
ENSG00000232855.7	13.8303	3.29813	1.29138	2.55396	0.0106506	0.999937	ENSG00000232855	AF165147.1
ENSG00000143627.19	13.8377	0.491199	1.01664	0.483158	0.628984	0.999937	ENSG00000143627	PKLR
ENSG00000226530.2	13.8408	1.09696	1.18716	0.924018	0.355477	0.999937	ENSG00000226530	AL158055.1
ENSG00000262456.1	13.8442	-0.107885	1.03101	-0.10464	0.916661	0.999937	ENSG00000262456	AC006435.1
ENSG00000205929.11	13.845	1.02135	1.08251	0.943502	0.345424	0.999937	ENSG00000205929	C21orf62
ENSG00000250539.1	13.8592	-0.733688	1.02294	-0.717237	0.473228	0.999937	ENSG00000250539	KRT8P33
ENSG00000185100.11	13.8621	1.09449	1.02872	1.06394	0.287357	0.999937	ENSG00000185100	ADSS1
ENSG00000172461.11	13.8656	0.517431	1.18875	0.435272	0.663365	0.999937	ENSG00000172461	FUT9
ENSG00000231760.5	13.8659	-0.284796	1.04672	-0.272085	0.785556	0.999937	ENSG00000231760	AL355312.2
ENSG00000223839.8	13.8703	1.1938	1.21684	0.981068	0.326559	0.999937	ENSG00000223839	FAM95B1
ENSG00000259353.1	13.8735	0.452569	1.01938	0.443963	0.657069	0.999937	ENSG00000259353	AC090515.4
ENSG00000239617.1	13.877	-2.12955	1.35642	-1.56998	0.116421	0.999937	ENSG00000239617	AC073610.1
ENSG00000186056.10	13.8815	0.0246064	1.04205	0.0236136	0.981161	0.999937	ENSG00000186056	MATN1-AS1
ENSG00000288542.1	13.8887	1.76088	3.84319	0.458181	0.646822	0.999937	ENSG00000288542	AL133318.1
ENSG00000265489.1	13.8897	2.18464	1.2113	1.80355	0.0713013	0.999937	ENSG00000265489	AC005358.1
ENSG00000230918.2	13.8897	1.08071	1.02904	1.05021	0.293623	0.999937	ENSG00000230918	DPP4-DT
ENSG00000223953.6	13.8901	1.09085	1.02217	1.06719	0.285887	0.999937	ENSG00000223953	C1QTNF5
ENSG00000141527.18	13.8911	0.444951	1.24098	0.358549	0.719932	0.999937	ENSG00000141527	CARD14
ENSG00000266378.1	13.8936	1.97098	1.2396	1.59001	0.111833	0.999937	ENSG00000266378	AC005224.2
ENSG00000259251.2	13.897	-0.764559	1.05742	-0.723039	0.469656	0.999937	ENSG00000259251	AC104590.1
ENSG00000237438.7	13.8981	-0.936989	1.04271	-0.898606	0.368862	0.999937	ENSG00000237438	CECR7
ENSG00000259430.2	13.9024	2.31953	1.34409	1.72572	0.0843983	0.999937	ENSG00000259430	CERS3-AS1
ENSG00000273619.1	13.9152	-0.148088	1.0113	-0.146433	0.88358	0.999937	ENSG00000273619	AL121832.2
ENSG00000283268.1	13.9183	-1.35574	1.12043	-1.21002	0.226272	0.999937	ENSG00000283268	TEX54
ENSG00000272086.1	13.9193	0.181914	1.06919	0.170142	0.864898	0.999937	ENSG00000272086	AC025181.2
ENSG00000277511.1	13.9197	0.158584	1.0563	0.150132	0.880661	0.999937	ENSG00000277511	AC116407.2
ENSG00000287966.1	13.922	-0.710702	1.03973	-0.683544	0.494263	0.999937	ENSG00000287966	AL590062.1
ENSG00000265907.2	13.9246	-0.1238	1.03917	-0.119134	0.905169	0.999937	ENSG00000265907	AP000919.1
ENSG00000068078.19	13.9303	0.254741	1.14065	0.22333	0.823278	0.999937	ENSG00000068078	FGFR3
ENSG00000228802.1	13.9407	-0.224133	1.0406	-0.215388	0.829465	0.999937	ENSG00000228802	AC073641.1
ENSG00000260007.3	13.9563	0.733696	1.13934	0.643966	0.519598	0.999937	ENSG00000260007	AC107871.1
ENSG00000260558.2	13.9572	0.516304	1.01697	0.507689	0.611672	0.999937	ENSG00000260558	AC018557.2
ENSG00000171812.13	13.9576	0.670222	1.02916	0.65123	0.514898	0.999937	ENSG00000171812	COL8A2
ENSG00000122012.14	13.9584	3.21451	1.31759	2.43968	0.0147002	0.999937	ENSG00000122012	SV2C
ENSG00000285278.1	13.9754	1.31903	1.12689	1.17051	0.241796	0.999937	ENSG00000285278	TFAP2A-AS2
ENSG00000138336.9	13.9824	0.977802	1.033	0.946562	0.343862	0.999937	ENSG00000138336	TET1
ENSG00000162814.11	13.9846	-1.17367	1.13457	-1.03446	0.30092	0.999937	ENSG00000162814	SPATA17
ENSG00000272844.1	13.9883	-0.0736881	1.0438	-0.0705962	0.943719	0.999937	ENSG00000272844	AC074044.1
ENSG00000161103.11	13.9927	0.0704363	1.63003	0.0432116	0.965533	0.999937	ENSG00000161103	AC008132.1
ENSG00000240775.1	14.0029	0.84822	1.12211	0.755915	0.4497	0.999937	ENSG00000240775	AC021205.1
ENSG00000231752.6	14.0038	-0.0733565	1.07041	-0.068531	0.945363	0.999937	ENSG00000231752	EMBP1
ENSG00000106511.6	14.0087	1.5973	1.19169	1.34036	0.180128	0.999937	ENSG00000106511	MEOX2
ENSG00000280347.1	14.0169	-0.304366	1.02217	-0.297766	0.765882	0.999937	ENSG00000280347	AC000123.3
ENSG00000257607.1	14.0185	-0.0146205	1.03436	-0.0141348	0.988722	0.999937	ENSG00000257607	AC073957.2
ENSG00000159251.8	14.02	-0.0460625	1.03237	-0.0446182	0.964412	0.999937	ENSG00000159251	ACTC1
ENSG00000071991.9	14.0215	-0.10429	1.08561	-0.0960651	0.923469	0.999937	ENSG00000071991	CDH19
ENSG00000183783.7	14.0296	-0.00573801	1.0628	-0.00539894	0.995692	0.999937	ENSG00000183783	KCTD8
ENSG00000205085.12	14.0302	1.59734	1.29976	1.22895	0.219091	0.999937	ENSG00000205085	FAM71F2
ENSG00000255136.3	14.0323	1.5957	1.41483	1.12784	0.259387	0.999937	ENSG00000255136	AP001972.3
ENSG00000172000.7	14.0394	3.24986	1.21311	2.67895	0.00738545	0.999937	ENSG00000172000	ZNF556
ENSG00000260526.1	14.0418	-0.159824	1.15722	-0.13811	0.890154	0.999937	ENSG00000260526	AC109347.1
ENSG00000180096.12	14.05	1.00474	1.04252	0.963764	0.335164	0.999937	ENSG00000180096	SEPTIN1
ENSG00000271119.1	14.0506	0.0884541	1.01289	0.0873284	0.930411	0.999937	ENSG00000271119	AC026412.3
ENSG00000089505.17	14.0509	0.288402	1.04448	0.27612	0.782456	0.999937	ENSG00000089505	CMTM1
ENSG00000272138.2	14.0589	0.116407	1.09014	0.106782	0.914962	0.999937	ENSG00000272138	LINC01607
ENSG00000267432.6	14.0597	1.87362	1.40262	1.3358	0.181614	0.999937	ENSG00000267432	DNAH17-AS1
ENSG00000254226.6	14.0601	1.86552	1.11576	1.67197	0.094531	0.999937	ENSG00000254226	LINC01933
ENSG00000273284.1	14.0616	-0.104459	1.03217	-0.101203	0.919389	0.999937	ENSG00000273284	AP001033.2
ENSG00000245768.7	14.0648	0.0207097	1.03778	0.0199557	0.984079	0.999937	ENSG00000245768	AC106793.1
ENSG00000257379.1	14.0659	-0.436929	1.11155	-0.393079	0.694261	0.999937	ENSG00000257379	AC023509.1
ENSG00000285710.1	14.084	-0.258775	1.01652	-0.25457	0.799055	0.999937	ENSG00000285710	AC012184.4
ENSG00000154258.17	14.0852	1.31717	1.2006	1.0971	0.272599	0.999937	ENSG00000154258	ABCA9
ENSG00000128268.12	14.0872	0.967536	1.02262	0.946136	0.344079	0.999937	ENSG00000128268	MGAT3
ENSG00000206127.11	14.0901	0.635498	1.12025	0.567284	0.570521	0.999937	ENSG00000206127	GOLGA8O
ENSG00000065675.15	14.0912	0.562637	1.03977	0.541118	0.588426	0.999937	ENSG00000065675	PRKCQ
ENSG00000279861.1	14.0922	0.352203	1.00964	0.34884	0.72721	0.999937	ENSG00000279861	AC073548.1
ENSG00000203999.9	14.0926	-0.546741	1.0352	-0.528151	0.597395	0.999937	ENSG00000203999	LINC01270
ENSG00000175445.17	14.0961	1.11132	1.04132	1.06723	0.285867	0.999937	ENSG00000175445	LPL
ENSG00000120341.18	14.0967	1.08616	1.08073	1.00503	0.314882	0.999937	ENSG00000120341	SEC16B
ENSG00000249568.1	14.0976	-0.400183	1.0112	-0.395749	0.692291	0.999937	ENSG00000249568	AC104793.1
ENSG00000125864.14	14.0992	0.613515	1.0556	0.581203	0.561104	0.999937	ENSG00000125864	BFSP1
ENSG00000170074.19	14.1007	2.36692	1.15891	2.04237	0.0411153	0.999937	ENSG00000170074	FAM153A
ENSG00000143473.13	14.1017	-0.399557	1.04163	-0.38359	0.701282	0.999937	ENSG00000143473	KCNH1
ENSG00000158296.14	14.1128	0.691982	1.07562	0.643331	0.520009	0.999937	ENSG00000158296	SLC13A3
ENSG00000279085.1	14.1132	1.44602	1.11265	1.29962	0.193732	0.999937	ENSG00000279085	AL022323.2
ENSG00000224063.6	14.1142	-0.2045	1.01913	-0.200662	0.840963	0.999937	ENSG00000224063	AC007319.1
ENSG00000121895.8	14.115	0.830016	1.16633	0.71165	0.476682	0.999937	ENSG00000121895	TMEM156
ENSG00000254003.1	14.116	-0.265697	1.02689	-0.258739	0.795837	0.999937	ENSG00000254003	AC003991.2
ENSG00000180113.16	14.1304	1.34362	1.11362	1.20654	0.227611	0.999937	ENSG00000180113	TDRD6
ENSG00000108001.15	14.1331	0.560835	1.22347	0.458397	0.646667	0.999937	ENSG00000108001	EBF3
ENSG00000237753.2	14.1429	-0.334702	1.06073	-0.315539	0.752353	0.999937	ENSG00000237753	AC079922.2
ENSG00000124882.4	14.1461	1.11861	1.14151	0.979937	0.327117	0.999937	ENSG00000124882	EREG
ENSG00000279434.1	14.1515	0.393182	1.02954	0.3819	0.702535	0.999937	ENSG00000279434	AL049776.1
ENSG00000166415.15	14.1548	1.55311	1.12198	1.38427	0.166277	0.999937	ENSG00000166415	WDR72
ENSG00000227373.6	14.155	1.58869	1.45106	1.09485	0.273585	0.999937	ENSG00000227373	RABGAP1L-DT
ENSG00000251013.1	14.1558	-0.417678	1.09556	-0.381246	0.703021	0.999937	ENSG00000251013	GAPDHP62
ENSG00000129451.12	14.1574	0.129378	1.2328	0.104946	0.916418	0.999937	ENSG00000129451	KLK10
ENSG00000250571.7	14.1601	1.3489	1.05496	1.27863	0.201028	0.999937	ENSG00000250571	GLI4
ENSG00000150893.11	14.1805	1.97466	1.21404	1.62653	0.103838	0.999937	ENSG00000150893	FREM2
ENSG00000260537.2	14.1812	1.80797	3.84298	0.47046	0.638026	0.999937	ENSG00000260537	AC012184.2
ENSG00000178445.10	14.1876	1.94763	1.03335	1.88476	0.0594618	0.999937	ENSG00000178445	GLDC
ENSG00000279706.1	14.1922	0.235513	1.037	0.227111	0.820338	0.999937	ENSG00000279706	AL353608.4
ENSG00000102230.14	14.1939	0.69523	1.16466	0.596936	0.55055	0.999937	ENSG00000102230	PCYT1B
ENSG00000242338.6	14.2001	-0.693139	1.01544	-0.682599	0.49486	0.999937	ENSG00000242338	BMS1P4
ENSG00000102904.14	14.2068	0.374637	1.04571	0.358262	0.720148	0.999937	ENSG00000102904	TSNAXIP1
ENSG00000197837.3	14.2073	0.493497	1.04869	0.470582	0.637939	0.999937	ENSG00000197837	H4-16
ENSG00000266527.1	14.2104	-0.207844	1.01777	-0.204215	0.838185	0.999937	ENSG00000266527	AC005697.2
ENSG00000273492.6	14.2148	1.09755	1.02132	1.07464	0.282534	0.999937	ENSG00000273492	AP000229.1
ENSG00000174130.12	14.2167	0.744022	1.21754	0.611085	0.541144	0.999937	ENSG00000174130	TLR6
ENSG00000186960.12	14.2189	4.09387	1.6861	2.428	0.0151822	0.999937	ENSG00000186960	LINC01551
ENSG00000147614.4	14.2204	-0.450513	1.31983	-0.341342	0.732846	0.999937	ENSG00000147614	ATP6V0D2
ENSG00000137959.16	14.2231	1.65278	1.1149	1.48245	0.138221	0.999937	ENSG00000137959	IFI44L
ENSG00000235244.4	14.2247	0.290672	1.05559	0.275365	0.783036	0.999937	ENSG00000235244	DANT2
ENSG00000258554.1	14.2549	0.356287	1.10712	0.321815	0.747593	0.999937	ENSG00000258554	AC025162.1
ENSG00000127325.19	14.2559	0.221381	1.09665	0.201871	0.840018	0.999937	ENSG00000127325	BEST3
ENSG00000279233.1	14.2607	0.848129	1.02767	0.825295	0.409204	0.999937	ENSG00000279233	AC122688.3
ENSG00000267374.2	14.269	1.70438	1.17965	1.44482	0.148509	0.999937	ENSG00000267374	MIR924HG
ENSG00000221949.6	14.2699	1.98043	1.18099	1.67691	0.0935591	0.999937	ENSG00000221949	LINC01465
ENSG00000184669.9	14.2877	0.934774	1.12804	0.828674	0.407289	0.999937	ENSG00000184669	OR7E14P
ENSG00000232679.2	14.2884	-0.391437	1.10251	-0.355043	0.722558	0.999937	ENSG00000232679	LINC01705
ENSG00000237596.7	14.2893	2.41588	1.10476	2.1868	0.0287575	0.999937	ENSG00000237596	AL138828.1
ENSG00000188039.16	14.2903	0.312665	1.13599	0.275235	0.783136	0.999937	ENSG00000188039	NWD1
ENSG00000261737.1	14.2922	1.07182	1.13215	0.94671	0.343787	0.999937	ENSG00000261737	CLCA4-AS1
ENSG00000235370.6	14.2926	1.68783	1.14207	1.47786	0.139444	0.999937	ENSG00000235370	DNM1P51
ENSG00000181234.9	14.2967	0.0313567	1.03445	0.0303124	0.975818	0.999937	ENSG00000181234	TMEM132C
ENSG00000214110.3	14.3068	-0.0779568	1.16134	-0.0671267	0.946481	0.999937	ENSG00000214110	LDHAP4
ENSG00000185156.6	14.3085	0.531165	1.07163	0.495662	0.620133	0.999937	ENSG00000185156	MFSD6L
ENSG00000091536.19	14.3126	0.238353	1.02981	0.231454	0.816962	0.999937	ENSG00000091536	MYO15A
ENSG00000173442.13	14.3144	0.233898	1.09476	0.213653	0.830818	0.999937	ENSG00000173442	EHBP1L1
ENSG00000232850.3	14.3236	0.239689	1.07166	0.223661	0.823021	0.999937	ENSG00000232850	PTGES2-AS1
ENSG00000146094.15	14.3316	0.527762	1.00766	0.52375	0.600452	0.999937	ENSG00000146094	DOK3
ENSG00000140519.14	14.3317	0.414202	1.04013	0.398221	0.690468	0.999937	ENSG00000140519	RHCG
ENSG00000107611.16	14.3353	2.30068	1.22211	1.88255	0.0597609	0.999937	ENSG00000107611	CUBN
ENSG00000133519.12	14.3357	1.39033	1.03407	1.34453	0.178778	0.999937	ENSG00000133519	ZDHHC8P1
ENSG00000163746.11	14.3428	0.237731	1.01208	0.234894	0.814291	0.999937	ENSG00000163746	PLSCR2
ENSG00000276570.1	14.3431	0.592581	1.08962	0.543844	0.586549	0.999937	ENSG00000276570	AC010327.6
ENSG00000162997.15	14.3435	0.315333	1.0708	0.294484	0.768388	0.999937	ENSG00000162997	PRORSD1P
ENSG00000186301.8	14.344	0.682425	1.07857	0.632712	0.526922	0.999937	ENSG00000186301	MST1P2
ENSG00000271933.1	14.3494	0.314666	1.03793	0.303167	0.761762	0.999937	ENSG00000271933	AL603756.1
ENSG00000274026.2	14.3531	2.16492	1.21585	1.78059	0.0749793	0.999937	ENSG00000274026	FAM27E3
ENSG00000250280.2	14.3585	0.842876	1.00004	0.842842	0.399317	0.999937	ENSG00000250280	AC026124.1
ENSG00000272727.2	14.3627	0.282183	0.994841	0.283646	0.776681	0.999937	ENSG00000272727	LINC02266
ENSG00000176927.15	14.3632	1.45285	1.01894	1.42585	0.153912	0.999937	ENSG00000176927	EFCAB5
ENSG00000260213.6	14.3649	0.193286	1.01722	0.190014	0.849298	0.999937	ENSG00000260213	AC092718.2
ENSG00000258136.2	14.3785	0.902603	1.10379	0.817731	0.413511	0.999937	ENSG00000258136	AC007622.2
ENSG00000255404.1	14.3875	0.322459	1.12674	0.286187	0.774735	0.999937	ENSG00000255404	AP001266.1
ENSG00000163736.4	14.3915	-3.55474	1.28517	-2.76596	0.00567552	0.999937	ENSG00000163736	PPBP
ENSG00000249035.7	14.4047	-0.66969	1.01206	-0.661713	0.508155	0.999937	ENSG00000249035	CLMAT3
ENSG00000205363.5	14.4072	0.422547	1.01082	0.418024	0.675929	0.999937	ENSG00000205363	INSYN1
ENSG00000276170.4	14.4171	0.529635	1.21604	0.435541	0.663169	0.999937	ENSG00000276170	AC244153.1
ENSG00000231663.1	14.4192	0.39071	1.00468	0.388889	0.697358	0.999937	ENSG00000231663	COA6-AS1
ENSG00000267216.1	14.4196	2.03241	1.19006	1.70782	0.0876697	0.999937	ENSG00000267216	ZNF8-ERVK3-1
ENSG00000159261.12	14.4208	0.400415	1.05317	0.380199	0.703798	0.999937	ENSG00000159261	CLDN14
ENSG00000219438.9	14.4224	1.13417	1.06562	1.06433	0.287181	0.999937	ENSG00000219438	TAFA5
ENSG00000066923.17	14.4245	0.879168	1.01701	0.864463	0.387334	0.999937	ENSG00000066923	STAG3
ENSG00000040608.14	14.4258	-0.157756	1.01737	-0.155062	0.876773	0.999937	ENSG00000040608	RTN4R
ENSG00000249396.2	14.4288	-0.0792596	1.33134	-0.0595338	0.952527	0.999937	ENSG00000249396	LINC02212
ENSG00000236397.3	14.4296	0.988817	1.02354	0.966073	0.334008	0.999937	ENSG00000236397	DDX11L2
ENSG00000137727.12	14.4338	0.675081	1.11504	0.60543	0.544893	0.999937	ENSG00000137727	ARHGAP20
ENSG00000197360.9	14.4345	0.880653	1.00907	0.87274	0.382805	0.999937	ENSG00000197360	ZNF98
ENSG00000147174.11	14.4378	-0.847744	1.01436	-0.835746	0.403298	0.999937	ENSG00000147174	GCNA
ENSG00000075043.18	14.4495	0.7677	1.06079	0.723709	0.469244	0.999937	ENSG00000075043	KCNQ2
ENSG00000124491.16	14.4535	2.0039	1.10132	1.81954	0.0688296	0.999937	ENSG00000124491	F13A1
ENSG00000169876.14	14.4618	4.07849	1.22734	3.32303	0.000890456	0.948335	ENSG00000169876	MUC17
ENSG00000101276.18	14.4696	0.534319	1.07516	0.496966	0.619213	0.999937	ENSG00000101276	SLC52A3
ENSG00000279329.1	14.488	0.542762	1.02101	0.531596	0.595006	0.999937	ENSG00000279329	AC020910.6
ENSG00000205592.15	14.4905	1.9166	1.2224	1.5679	0.116903	0.999937	ENSG00000205592	MUC19
ENSG00000287222.1	14.4928	0.615103	1.03227	0.595872	0.551261	0.999937	ENSG00000287222	AC234917.3
ENSG00000258354.1	14.4946	1.48502	1.08265	1.37165	0.170174	0.999937	ENSG00000258354	AC138932.2
ENSG00000279502.1	14.4965	0.23762	1.02131	0.232663	0.816023	0.999937	ENSG00000279502	AC016542.2
ENSG00000224891.1	14.4968	-0.169385	0.99411	-0.170389	0.864704	0.999937	ENSG00000224891	ARL14EPP1
ENSG00000272720.1	14.5003	-0.287747	0.998732	-0.288112	0.773261	0.999937	ENSG00000272720	AL022322.1
ENSG00000137672.13	14.5011	1.26488	1.05472	1.19926	0.230428	0.999937	ENSG00000137672	TRPC6
ENSG00000255794.9	14.5077	2.40264	1.06931	2.2469	0.0246462	0.999937	ENSG00000255794	RMST
ENSG00000184113.9	14.5138	1.97137	1.36439	1.44488	0.148492	0.999937	ENSG00000184113	CLDN5
ENSG00000255595.5	14.514	1.93361	1.22359	1.58027	0.114044	0.999937	ENSG00000255595	AC007368.1
ENSG00000183281.14	14.5187	-1.7254	1.19675	-1.44174	0.149377	0.999937	ENSG00000183281	PLGLB1
ENSG00000276966.2	14.5262	0.809296	1.10569	0.731938	0.464206	0.999937	ENSG00000276966	H4C5
ENSG00000259146.4	14.5306	-1.63477	1.23717	-1.32138	0.186375	0.999937	ENSG00000259146	AC005476.2
ENSG00000128596.17	14.531	0.263728	1.0201	0.258532	0.795996	0.999937	ENSG00000128596	CCDC136
ENSG00000269940.1	14.5318	-0.00674075	1.05093	-0.0064141	0.994882	0.999937	ENSG00000269940	AL049840.5
ENSG00000204860.5	14.5344	-0.168147	1.02725	-0.163686	0.869978	0.999937	ENSG00000204860	FAM201A
ENSG00000119973.6	14.5344	1.04974	1.05079	0.999003	0.317793	0.999937	ENSG00000119973	PRLHR
ENSG00000089820.16	14.5418	1.32946	1.05627	1.25864	0.20816	0.999937	ENSG00000089820	ARHGAP4
ENSG00000265749.6	14.5429	0.23796	0.99729	0.238607	0.811411	0.999937	ENSG00000265749	AC135178.4
ENSG00000159761.15	14.5441	-0.329305	1.01521	-0.324372	0.745656	0.999937	ENSG00000159761	C16orf86
ENSG00000240057.6	14.5508	0.0492388	1.0111	0.0486984	0.96116	0.999937	ENSG00000240057	AC078785.1
ENSG00000182168.15	14.557	1.76017	1.00481	1.75174	0.0798187	0.999937	ENSG00000182168	UNC5C
ENSG00000288622.1	14.5579	-6.0103	3.89754	-1.54207	0.123056	0.999937	ENSG00000288622	AC010442.3
ENSG00000277998.1	14.5644	5.46979	3.89338	1.4049	0.160052	0.999937	ENSG00000277998	AC107075.1
ENSG00000163959.10	14.5666	0.368513	1.00556	0.366477	0.714009	0.999937	ENSG00000163959	SLC51A
ENSG00000106066.15	14.5702	0.0363097	1.02282	0.0354995	0.971681	0.999937	ENSG00000106066	CPVL
ENSG00000272518.1	14.5723	-0.840435	1.07794	-0.779666	0.435587	0.999937	ENSG00000272518	AC036214.2
ENSG00000148204.12	14.5764	0.813428	1.06883	0.761048	0.446629	0.999937	ENSG00000148204	CRB2
ENSG00000167525.14	14.6011	0.0132689	1.03053	0.0128758	0.989727	0.999937	ENSG00000167525	PROCA1
ENSG00000237406.1	14.6208	-0.9636	1.07219	-0.898719	0.368802	0.999937	ENSG00000237406	NDUFA9P1
ENSG00000213903.9	14.6235	0.59363	0.987379	0.601218	0.547695	0.999937	ENSG00000213903	LTB4R
ENSG00000167723.15	14.6283	0.842812	1.07262	0.785752	0.432013	0.999937	ENSG00000167723	TRPV3
ENSG00000234062.8	14.6468	0.141473	1.09048	0.129734	0.896777	0.999937	ENSG00000234062	AL390879.1
ENSG00000279652.1	14.6481	0.683204	1.03572	0.659642	0.509484	0.999937	ENSG00000279652	Z82217.1
ENSG00000267735.1	14.6568	-0.887421	1.02621	-0.864758	0.387172	0.999937	ENSG00000267735	AC020934.2
ENSG00000127364.4	14.659	-0.227037	1.03171	-0.220058	0.825826	0.999937	ENSG00000127364	TAS2R4
ENSG00000150556.17	14.6671	0.664494	1.05765	0.628273	0.529825	0.999937	ENSG00000150556	LYPD6B
ENSG00000161381.14	14.6741	-0.141529	1.21527	-0.116459	0.907289	0.999937	ENSG00000161381	PLXDC1
ENSG00000279467.1	14.6772	1.72306	1.16667	1.47691	0.139701	0.999937	ENSG00000279467	AP000350.7
ENSG00000272368.2	14.6794	-0.247588	0.988582	-0.250447	0.802241	0.999937	ENSG00000272368	AC074032.1
ENSG00000157890.17	14.69	0.924644	1.04034	0.888792	0.374115	0.999937	ENSG00000157890	MEGF11
ENSG00000255439.6	14.6902	0.107999	1.01532	0.106369	0.915289	0.999937	ENSG00000255439	AC135050.2
ENSG00000164588.8	14.7029	1.57613	1.18025	1.33542	0.181738	0.999937	ENSG00000164588	HCN1
ENSG00000174740.8	14.713	-0.411037	1.01402	-0.405353	0.685218	0.999937	ENSG00000174740	PABPC5
ENSG00000066294.15	14.714	2.97639	1.22601	2.4277	0.015195	0.999937	ENSG00000066294	CD84
ENSG00000278367.1	14.7165	-2.00679	1.1649	-1.72272	0.0849386	0.999937	ENSG00000278367	AL356652.1
ENSG00000274964.1	14.7189	0.479352	1.01922	0.470311	0.638133	0.999937	ENSG00000274964	AC026356.1
ENSG00000259118.5	14.7222	-0.311552	1.0123	-0.307765	0.758261	0.999937	ENSG00000259118	AL139022.1
ENSG00000279365.1	14.7234	0.179997	1.02984	0.174781	0.861252	0.999937	ENSG00000279365	AP000695.3
ENSG00000259030.7	14.7239	0.412977	1.07258	0.385031	0.700215	0.999937	ENSG00000259030	FPGT-TNNI3K
ENSG00000171643.14	14.7415	1.38408	1.02639	1.34849	0.1775	0.999937	ENSG00000171643	S100Z
ENSG00000249740.3	14.7469	0.0571438	1.13668	0.0502727	0.959905	0.999937	ENSG00000249740	OSMR-AS1
ENSG00000164690.8	14.752	2.19477	1.21316	1.80913	0.0704307	0.999937	ENSG00000164690	SHH
ENSG00000279118.1	14.7594	0.565235	0.991942	0.569827	0.568795	0.999937	ENSG00000279118	AC093535.2
ENSG00000079931.15	14.7635	0.434569	0.992521	0.437844	0.661499	0.999937	ENSG00000079931	MOXD1
ENSG00000175311.7	14.7716	1.9284	1.08763	1.77303	0.0762239	0.999937	ENSG00000175311	ANKS4B
ENSG00000284095.1	14.7752	0.775424	1.24317	0.623749	0.532792	0.999937	ENSG00000284095	AC055733.5
ENSG00000246379.8	14.7809	1.55026	1.19343	1.299	0.193945	0.999937	ENSG00000246379	AC040168.1
ENSG00000189350.12	14.7856	1.54472	1.00716	1.53373	0.125095	0.999937	ENSG00000189350	TOGARAM2
ENSG00000137434.11	14.7876	0.0947031	1.09522	0.0864698	0.931093	0.999937	ENSG00000137434	C6orf52
ENSG00000280341.1	14.7895	1.85141	1.22391	1.51271	0.130354	0.999937	ENSG00000280341	AP000542.3
ENSG00000283384.1	14.7896	2.85431	1.05792	2.69803	0.00697503	0.999937	ENSG00000283384	AL138694.1
ENSG00000246731.3	14.798	1.06504	1.00304	1.06181	0.288324	0.999937	ENSG00000246731	MGC16275
ENSG00000267449.1	14.7996	-0.102298	1.0581	-0.0966815	0.922979	0.999937	ENSG00000267449	AC005884.2
ENSG00000226312.7	14.8043	-0.415324	1.15111	-0.360803	0.718246	0.999937	ENSG00000226312	CFLAR-AS1
ENSG00000245552.7	14.8091	0.613907	1.00284	0.612168	0.540427	0.999937	ENSG00000245552	AP000787.1
ENSG00000148826.9	14.8197	1.35821	1.13862	1.19286	0.232925	0.999937	ENSG00000148826	NKX6-2
ENSG00000233695.2	14.8211	0.499061	1.08346	0.460616	0.645074	0.999937	ENSG00000233695	GAS6-AS1
ENSG00000225526.4	14.8212	-1.23893	1.016	-1.21942	0.222684	0.999937	ENSG00000225526	MKRN2OS
ENSG00000172482.5	14.825	2.57873	1.13387	2.27427	0.0229499	0.999937	ENSG00000172482	AGXT
ENSG00000272631.1	14.8264	1.42851	1.08225	1.31995	0.186853	0.999937	ENSG00000272631	AC067750.1
ENSG00000205583.13	14.829	-1.17375	1.10332	-1.06383	0.287404	0.999937	ENSG00000205583	STAG3L1
ENSG00000139269.3	14.8412	-0.105161	1.04874	-0.100274	0.920127	0.999937	ENSG00000139269	INHBE
ENSG00000090104.12	14.8434	1.70662	1.02209	1.66974	0.0949715	0.999937	ENSG00000090104	RGS1
ENSG00000282416.1	14.8442	0.397093	0.993528	0.39968	0.689392	0.999937	ENSG00000282416	AC092299.1
ENSG00000153404.14	14.8474	1.84645	1.04421	1.76828	0.0770133	0.999937	ENSG00000153404	PLEKHG4B
ENSG00000251131.2	14.8515	2.74936	1.28079	2.14661	0.0318242	0.999937	ENSG00000251131	AC025171.3
ENSG00000233912.1	14.8537	-0.702645	1.03078	-0.681665	0.495451	0.999937	ENSG00000233912	AC026202.2
ENSG00000150637.9	14.8554	2.89705	1.21055	2.39317	0.0167035	0.999937	ENSG00000150637	CD226
ENSG00000165695.10	14.8614	0.404644	0.988962	0.409161	0.682422	0.999937	ENSG00000165695	AK8
ENSG00000236204.6	14.8619	-1.01809	1.08258	-0.940435	0.346995	0.999937	ENSG00000236204	LINC01376
ENSG00000228549.4	14.8624	1.84608	1.61151	1.14556	0.251978	0.999937	ENSG00000228549	BX284668.2
ENSG00000169684.13	14.867	0.349877	0.989653	0.353535	0.723687	0.999937	ENSG00000169684	CHRNA5
ENSG00000286657.1	14.8744	-0.912246	1.10366	-0.826562	0.408485	0.999937	ENSG00000286657	AC008453.2
ENSG00000272143.1	14.8752	0.568052	1.07906	0.526433	0.598587	0.999937	ENSG00000272143	FGF14-AS2
ENSG00000253731.3	14.8783	1.07248	1.00508	1.06706	0.285944	0.999937	ENSG00000253731	PCDHGA6
ENSG00000267750.6	14.8837	0.177113	1.06393	0.166471	0.867787	0.999937	ENSG00000267750	RUNDC3A-AS1
ENSG00000236816.3	14.8899	1.13723	1.14866	0.990052	0.322149	0.999937	ENSG00000236816	ANKRD20A7P
ENSG00000253452.6	14.8983	2.70349	1.32623	2.03848	0.0415017	0.999937	ENSG00000253452	AC124290.1
ENSG00000286000.1	14.9072	-0.351523	1.03643	-0.339166	0.734485	0.999937	ENSG00000286000	AC234775.4
ENSG00000184194.6	14.9118	1.88168	1.11305	1.69056	0.0909217	0.999937	ENSG00000184194	GPR173
ENSG00000242715.8	14.9229	0.431712	0.994389	0.434148	0.664181	0.999937	ENSG00000242715	CCDC169
ENSG00000106278.12	14.93	1.00179	1.36145	0.735825	0.461837	0.999937	ENSG00000106278	PTPRZ1
ENSG00000213999.17	14.9454	-0.671815	1.27074	-0.528682	0.597026	0.999937	ENSG00000213999	MEF2B
ENSG00000284052.1	14.9533	0.283794	1.05955	0.267844	0.788819	0.999937	ENSG00000284052	AC006460.2
ENSG00000170469.10	14.9594	-0.357082	0.994722	-0.358977	0.719613	0.999937	ENSG00000170469	SPATA24
ENSG00000205853.12	14.9658	-0.158424	1.0477	-0.151212	0.879809	0.999937	ENSG00000205853	RFPL3S
ENSG00000271830.1	14.97	-1.41226	1.14973	-1.22834	0.21932	0.999937	ENSG00000271830	AC012213.4
ENSG00000164675.11	14.9736	-0.413454	1.01335	-0.408005	0.68327	0.999937	ENSG00000164675	IQUB
ENSG00000166105.16	14.9809	0.49138	0.998184	0.492274	0.622526	0.999937	ENSG00000166105	GLB1L3
ENSG00000128655.18	14.9839	1.1917	1.04451	1.14092	0.253902	0.999937	ENSG00000128655	PDE11A
ENSG00000267419.2	14.9844	-0.662227	0.987408	-0.670672	0.502429	0.999937	ENSG00000267419	ZNF56
ENSG00000274944.4	14.9888	-0.581283	1.02232	-0.568591	0.569634	0.999937	ENSG00000274944	AL139260.3
ENSG00000254413.8	14.9923	-1.18084	1.04189	-1.13336	0.257062	0.999937	ENSG00000254413	CHKB-CPT1B
ENSG00000172137.19	14.9949	0.636039	1.03648	0.613652	0.539445	0.999937	ENSG00000172137	CALB2
ENSG00000272701.3	15.0014	0.809157	1.03136	0.784549	0.432718	0.999937	ENSG00000272701	MESTIT1
ENSG00000171126.8	15.0038	0.348962	0.992602	0.351563	0.725166	0.999937	ENSG00000171126	KCNG3
ENSG00000171811.14	15.0052	0.00787214	0.98111	0.00802371	0.993598	0.999937	ENSG00000171811	CFAP46
ENSG00000226026.6	15.0166	0.700871	1.09037	0.642785	0.520364	0.999937	ENSG00000226026	AC092802.1
ENSG00000215910.7	15.0244	-0.21506	0.994119	-0.216332	0.828729	0.999937	ENSG00000215910	C1orf167
ENSG00000272079.2	15.0273	0.920533	1.10278	0.834738	0.403865	0.999937	ENSG00000272079	AC004233.2
ENSG00000159871.15	15.0298	0.752401	1.06007	0.709764	0.477851	0.999937	ENSG00000159871	LYPD5
ENSG00000254788.7	15.0336	-0.60368	1.02049	-0.591559	0.554146	0.999937	ENSG00000254788	CKLF-CMTM1
ENSG00000198064.13	15.0421	-0.587147	0.98323	-0.597161	0.5504	0.999937	ENSG00000198064	NPIPB13
ENSG00000231880.2	15.0422	-0.342669	0.999354	-0.342891	0.731681	0.999937	ENSG00000231880	KF459542.1
ENSG00000136872.20	15.0456	0.122511	1.00675	0.121689	0.903145	0.999937	ENSG00000136872	ALDOB
ENSG00000078596.11	15.0497	0.473966	1.02229	0.463634	0.64291	0.999937	ENSG00000078596	ITM2A
ENSG00000255145.3	15.0634	0.0519616	1.01197	0.0513469	0.959049	0.999937	ENSG00000255145	STX17-AS1
ENSG00000143341.12	15.0671	1.81262	1.2059	1.50313	0.132805	0.999937	ENSG00000143341	HMCN1
ENSG00000258525.2	15.0714	-0.169631	1.01825	-0.166591	0.867692	0.999937	ENSG00000258525	AL049830.3
ENSG00000233178.7	15.0729	0.290408	0.984362	0.295021	0.767977	0.999937	ENSG00000233178	AL161457.2
ENSG00000258177.1	15.0762	-1.06471	1.01018	-1.05398	0.291893	0.999937	ENSG00000258177	AC008149.1
ENSG00000255468.7	15.0789	-1.74597	1.08256	-1.61281	0.106786	0.999937	ENSG00000255468	AP001107.9
ENSG00000152467.10	15.0832	0.752894	0.999546	0.753236	0.451308	0.999937	ENSG00000152467	ZSCAN1
ENSG00000178722.13	15.0842	5.28823	1.50784	3.50715	0.000452929	0.702031	ENSG00000178722	C5orf64
ENSG00000235043.3	15.0845	0.108618	3.83978	0.0282877	0.977433	0.999937	ENSG00000235043	TECRP1
ENSG00000066185.13	15.0931	-1.53053	1.04057	-1.47086	0.141329	0.999937	ENSG00000066185	ZMYND12
ENSG00000240661.3	15.0934	0.546601	1.00856	0.541961	0.587846	0.999937	ENSG00000240661	AC063952.1
ENSG00000256870.3	15.0952	-0.855917	1.0888	-0.786111	0.431802	0.999937	ENSG00000256870	SLC5A8
ENSG00000228395.2	15.1105	-0.432203	0.981504	-0.440348	0.659685	0.999937	ENSG00000228395	AL356481.1
ENSG00000135547.9	15.1113	1.57008	1.04536	1.50195	0.133109	0.999937	ENSG00000135547	HEY2
ENSG00000228594.4	15.1137	0.955524	0.986247	0.968848	0.332621	0.999937	ENSG00000228594	FNDC10
ENSG00000253210.2	15.1329	-0.754898	0.995563	-0.758262	0.448294	0.999937	ENSG00000253210	AC040970.1
ENSG00000267232.1	15.138	0.268661	0.999039	0.268919	0.787992	0.999937	ENSG00000267232	AC012615.5
ENSG00000267390.1	15.1397	-0.392205	1.01723	-0.385562	0.699821	0.999937	ENSG00000267390	AC036176.1
ENSG00000120051.15	15.1441	0.612003	0.98577	0.620837	0.534707	0.999937	ENSG00000120051	CFAP58
ENSG00000109265.14	15.1447	0.361388	1.00021	0.361312	0.717866	0.999937	ENSG00000109265	CRACD
ENSG00000225449.3	15.1488	-0.869293	1.01866	-0.85337	0.393454	0.999937	ENSG00000225449	RAB6C-AS1
ENSG00000102837.7	15.1582	0.733785	1.05592	0.694925	0.487102	0.999937	ENSG00000102837	OLFM4
ENSG00000249684.6	15.1646	-0.146055	0.976707	-0.149539	0.881129	0.999937	ENSG00000249684	AC106795.2
ENSG00000223522.2	15.1705	-1.1099	1.0144	-1.09415	0.273888	0.999937	ENSG00000223522	AC093690.1
ENSG00000129535.13	15.1734	-0.510188	1.00056	-0.509904	0.610119	0.999937	ENSG00000129535	NRL
ENSG00000277879.1	15.1854	0.267187	0.983794	0.271588	0.785939	0.999937	ENSG00000277879	AL391988.1
ENSG00000196436.8	15.1857	0.833561	1.06242	0.784587	0.432696	0.999937	ENSG00000196436	NPIPB15
ENSG00000279891.1	15.1883	-0.307064	1.01578	-0.302295	0.762428	0.999937	ENSG00000279891	FLJ42393
ENSG00000239407.5	15.1908	-0.0305532	0.991517	-0.0308146	0.975417	0.999937	ENSG00000239407	Z68871.1
ENSG00000047597.7	15.191	-0.972754	1.04345	-0.932252	0.351207	0.999937	ENSG00000047597	XK
ENSG00000263126.1	15.1945	1.42405	1.12988	1.26035	0.207543	0.999937	ENSG00000263126	AC040162.3
ENSG00000215146.5	15.201	0.394301	0.980502	0.402142	0.68758	0.999937	ENSG00000215146	BX322639.1
ENSG00000188185.13	15.2082	0.653482	1.00267	0.651743	0.514567	0.999937	ENSG00000188185	LINC00265
ENSG00000167183.3	15.2098	-0.314207	1.05651	-0.297402	0.76616	0.999937	ENSG00000167183	PRR15L
ENSG00000228288.7	15.2139	-0.263615	1.01682	-0.259255	0.795438	0.999937	ENSG00000228288	PCAT6
ENSG00000227082.3	15.2186	0.359932	1.13601	0.316839	0.751366	0.999937	ENSG00000227082	LINC02798
ENSG00000176125.6	15.2189	0.293054	1.01294	0.289312	0.772343	0.999937	ENSG00000176125	UFSP1
ENSG00000124140.14	15.2309	-0.248976	0.982698	-0.253359	0.799991	0.999937	ENSG00000124140	SLC12A5
ENSG00000271133.5	15.2374	0.452795	0.977184	0.463367	0.643102	0.999937	ENSG00000271133	AC004130.2
ENSG00000135636.14	15.2377	-0.521192	1.07522	-0.484732	0.627867	0.999937	ENSG00000135636	DYSF
ENSG00000214376.6	15.2379	0.177561	1.05034	0.169052	0.865756	0.999937	ENSG00000214376	VSTM5
ENSG00000183671.12	15.2405	0.513626	1.07698	0.476914	0.633424	0.999937	ENSG00000183671	GPR1
ENSG00000181284.3	15.2437	0.312239	1.03175	0.30263	0.762172	0.999937	ENSG00000181284	TMEM102
ENSG00000274460.1	15.2568	0.59881	1.11774	0.535731	0.592145	0.999937	ENSG00000274460	AC092119.2
ENSG00000285188.1	15.2614	-1.74248	1.1484	-1.51731	0.129188	0.999937	ENSG00000285188	AC008397.2
ENSG00000237356.7	15.2657	0.299213	1.07033	0.279553	0.77982	0.999937	ENSG00000237356	AL365295.1
ENSG00000277734.8	15.2734	-0.525603	1.16943	-0.449454	0.653104	0.999937	ENSG00000277734	TRAC
ENSG00000196689.12	15.2791	0.645575	0.995339	0.648598	0.516598	0.999937	ENSG00000196689	TRPV1
ENSG00000158164.7	15.2836	-0.262828	0.994601	-0.264254	0.791584	0.999937	ENSG00000158164	TMSB15A
ENSG00000287553.1	15.2842	0.483402	0.974653	0.495974	0.619913	0.999937	ENSG00000287553	AC090617.10
ENSG00000183935.5	15.2863	2.21017	1.07877	2.0488	0.0404821	0.999937	ENSG00000183935	HTR7P1
ENSG00000272606.1	15.2903	0.440172	0.980597	0.448882	0.653517	0.999937	ENSG00000272606	AC015982.2
ENSG00000167680.16	15.2949	2.39538	1.31096	1.82719	0.0676711	0.999937	ENSG00000167680	SEMA6B
ENSG00000205918.9	15.2963	0.0678468	1.10667	0.0613073	0.951114	0.999937	ENSG00000205918	PDPK2P
ENSG00000234390.4	15.297	-0.153043	1.0178	-0.150366	0.880476	0.999937	ENSG00000234390	USP27X-AS1
ENSG00000076258.10	15.2978	-0.451838	0.982172	-0.460039	0.645488	0.999937	ENSG00000076258	FMO4
ENSG00000178773.15	15.3024	-0.101658	1.01987	-0.099677	0.920601	0.999937	ENSG00000178773	CPNE7
ENSG00000150510.17	15.3035	1.0548	1.04491	1.00947	0.31275	0.999937	ENSG00000150510	FAM124A
ENSG00000214870.9	15.3037	-0.15592	0.974536	-0.159994	0.872886	0.999937	ENSG00000214870	AC004540.1
ENSG00000251396.7	15.3051	-0.819592	1.1306	-0.724921	0.468501	0.999937	ENSG00000251396	LINC01301
ENSG00000138829.12	15.3063	1.22883	1.22992	0.999116	0.317738	0.999937	ENSG00000138829	FBN2
ENSG00000070808.16	15.323	1.78326	1.07135	1.6645	0.096013	0.999937	ENSG00000070808	CAMK2A
ENSG00000236548.2	15.328	0.925692	0.991758	0.933385	0.350621	0.999937	ENSG00000236548	RNF217-AS1
ENSG00000241956.10	15.3293	1.12073	1.09937	1.01942	0.308003	0.999937	ENSG00000241956	AC109466.1
ENSG00000233554.6	15.3333	-0.721661	1.00024	-0.721486	0.470611	0.999937	ENSG00000233554	B4GALT1-AS1
ENSG00000237846.1	15.3363	-0.486535	0.978513	-0.497219	0.619035	0.999937	ENSG00000237846	AL773545.3
ENSG00000237505.8	15.3367	2.94064	1.15035	2.5563	0.0105793	0.999937	ENSG00000237505	PKN2-AS1
ENSG00000233382.7	15.3422	1.71451	0.995496	1.72227	0.085021	0.999937	ENSG00000233382	NKAPP1
ENSG00000285649.1	15.3442	-0.307202	1.01881	-0.301529	0.763011	0.999937	ENSG00000285649	AL357079.2
ENSG00000250299.6	15.3514	-0.541138	0.971774	-0.556856	0.577626	0.999937	ENSG00000250299	MRPS31P4
ENSG00000186231.17	15.3525	-1.00578	1.02324	-0.982936	0.325639	0.999937	ENSG00000186231	KLHL32
ENSG00000188487.12	15.3608	-0.931751	1.06015	-0.878887	0.379462	0.999937	ENSG00000188487	INSC
ENSG00000261707.1	15.3612	0.394693	0.976039	0.404382	0.685932	0.999937	ENSG00000261707	AC092134.1
ENSG00000225828.1	15.371	0.797762	1.06846	0.746644	0.455278	0.999937	ENSG00000225828	FAM229A
ENSG00000158825.6	15.3751	-1.00047	1.05292	-0.950189	0.342016	0.999937	ENSG00000158825	CDA
ENSG00000206344.7	15.3966	1.18018	1.09996	1.07293	0.283303	0.999937	ENSG00000206344	HCG27
ENSG00000011332.19	15.4017	0.895637	1.05694	0.847387	0.396779	0.999937	ENSG00000011332	DPF1
ENSG00000242094.1	15.4054	-0.0158952	0.974468	-0.0163117	0.986986	0.999937	ENSG00000242094	FOXP1-IT1
ENSG00000180089.6	15.4125	-0.118226	1.02448	-0.1154	0.908128	0.999937	ENSG00000180089	TMEM86B
ENSG00000215196.5	15.4138	2.56763	1.17595	2.18345	0.0290023	0.999937	ENSG00000215196	BASP1-AS1
ENSG00000152766.6	15.4154	0.0366989	1.01072	0.0363098	0.971035	0.999937	ENSG00000152766	ANKRD22
ENSG00000203804.4	15.4166	-1.53666	1.04343	-1.47271	0.14083	0.999937	ENSG00000203804	ADAMTSL4-AS1
ENSG00000186094.17	15.4167	-0.866305	1.03069	-0.840509	0.400623	0.999937	ENSG00000186094	AGBL4
ENSG00000229618.3	15.4306	1.14645	1.21632	0.942559	0.345907	0.999937	ENSG00000229618	AC011287.1
ENSG00000286496.1	15.432	1.62877	1.03333	1.57624	0.114971	0.999937	ENSG00000286496	AL359764.1
ENSG00000255769.7	15.4329	-0.0473205	0.975676	-0.0485003	0.961318	0.999937	ENSG00000255769	GOLGA2P10
ENSG00000140678.17	15.4429	0.428442	1.0896	0.39321	0.694164	0.999937	ENSG00000140678	ITGAX
ENSG00000206140.11	15.4539	-0.122095	1.02922	-0.118628	0.90557	0.999937	ENSG00000206140	TMEM191C
ENSG00000181652.19	15.4563	2.62234	1.16766	2.24581	0.0247159	0.999937	ENSG00000181652	ATG9B
ENSG00000204851.7	15.4563	0.755269	0.994532	0.759421	0.447601	0.999937	ENSG00000204851	PNMA8B
ENSG00000177822.8	15.4576	1.94863	1.03596	1.881	0.0599718	0.999937	ENSG00000177822	TENM3-AS1
ENSG00000272523.1	15.4686	0.425143	0.99311	0.428093	0.668583	0.999937	ENSG00000272523	LINC01023
ENSG00000254122.3	15.4701	0.000623184	0.982102	0.00063454	0.999494	0.999937	ENSG00000254122	PCDHGB7
ENSG00000196834.12	15.4733	0.904288	1.01741	0.888813	0.374103	0.999937	ENSG00000196834	POTEI
ENSG00000166278.15	15.484	0.561718	0.990471	0.567123	0.570631	0.999937	ENSG00000166278	C2
ENSG00000254693.1	15.4868	-0.773382	1.04857	-0.73756	0.460782	0.999937	ENSG00000254693	AC010768.1
ENSG00000274292.1	15.494	0.795515	0.995645	0.798994	0.424294	0.999937	ENSG00000274292	AC084018.2
ENSG00000261770.1	15.5051	0.217453	0.98099	0.221667	0.824573	0.999937	ENSG00000261770	AC006504.1
ENSG00000260285.1	15.5054	-0.198206	1.1822	-0.167658	0.866852	0.999937	ENSG00000260285	AL133367.1
ENSG00000261560.1	15.5086	-0.0609495	0.981901	-0.062073	0.950505	0.999937	ENSG00000261560	AC007216.3
ENSG00000287825.1	15.5155	-0.693903	0.984193	-0.705048	0.480781	0.999937	ENSG00000287825	AL035587.2
ENSG00000182578.14	15.5166	1.53661	1.02498	1.49916	0.133831	0.999937	ENSG00000182578	CSF1R
ENSG00000251364.7	15.5227	0.0331448	1.00401	0.0330122	0.973665	0.999937	ENSG00000251364	AC107884.1
ENSG00000115266.12	15.5242	1.59686	1.11255	1.43531	0.151198	0.999937	ENSG00000115266	APC2
ENSG00000259891.1	15.526	0.541247	1.04503	0.517927	0.604509	0.999937	ENSG00000259891	AC107375.1
ENSG00000082293.13	15.5261	5.18021	1.32163	3.91955	8.87e-05	0.338556	ENSG00000082293	COL19A1
ENSG00000248538.8	15.527	1.27718	1.05823	1.2069	0.227469	0.999937	ENSG00000248538	AC022784.1
ENSG00000136286.16	15.5411	2.10904	1.29589	1.62748	0.103636	0.999937	ENSG00000136286	MYO1G
ENSG00000268030.1	15.5434	0.693351	0.973273	0.712391	0.476223	0.999937	ENSG00000268030	AC005253.1
ENSG00000165084.16	15.5466	1.60087	1.06195	1.50749	0.131686	0.999937	ENSG00000165084	C8orf34
ENSG00000213889.10	15.5715	0.367998	0.974725	0.37754	0.705772	0.999937	ENSG00000213889	PPM1N
ENSG00000099338.23	15.5752	0.368198	0.997467	0.369133	0.712028	0.999937	ENSG00000099338	CATSPERG
ENSG00000272341.1	15.5838	0.894995	0.977963	0.915162	0.360107	0.999937	ENSG00000272341	AL137003.1
ENSG00000254154.8	15.586	-0.875737	1.20891	-0.724403	0.468818	0.999937	ENSG00000254154	CRYZL2P-SEC16B
ENSG00000182575.8	15.5922	3.11879	1.20707	2.58376	0.00977287	0.999937	ENSG00000182575	NXPH3
ENSG00000224116.7	15.5942	0.510649	1.02262	0.499351	0.617532	0.999937	ENSG00000224116	INHBA-AS1
ENSG00000272970.3	15.5981	0.478675	1.01035	0.473771	0.635663	0.999937	ENSG00000272970	AC107294.2
ENSG00000269486.2	15.5995	0.0317673	0.999494	0.0317834	0.974645	0.999937	ENSG00000269486	ERVK9-11
ENSG00000145864.14	15.6018	1.44487	1.32988	1.08647	0.277272	0.999937	ENSG00000145864	GABRB2
ENSG00000267272.5	15.6042	-0.16112	0.999739	-0.161162	0.871966	0.999937	ENSG00000267272	LINC01140
ENSG00000178965.14	15.6083	1.23534	0.990311	1.24743	0.212242	0.999937	ENSG00000178965	ERICH3
ENSG00000149527.18	15.6291	2.66829	1.10905	2.40593	0.0161316	0.999937	ENSG00000149527	PLCH2
ENSG00000212864.3	15.6314	0.969154	1.017	0.952951	0.340615	0.999937	ENSG00000212864	RNF208
ENSG00000081237.20	15.6331	2.11825	1.3124	1.61403	0.10652	0.999937	ENSG00000081237	PTPRC
ENSG00000182272.12	15.6357	2.80189	1.1378	2.46255	0.0137951	0.999937	ENSG00000182272	B4GALNT4
ENSG00000203724.11	15.6418	-0.542657	0.982763	-0.552175	0.580828	0.999937	ENSG00000203724	C1orf53
ENSG00000226608.3	15.643	-0.306438	0.982956	-0.311751	0.75523	0.999937	ENSG00000226608	FTLP3
ENSG00000288075.1	15.6508	0.313869	0.995835	0.315181	0.752624	0.999937	ENSG00000288075	AC108519.1
ENSG00000244239.1	15.6531	-0.633602	0.978775	-0.647342	0.517411	0.999937	ENSG00000244239	AC007009.1
ENSG00000184347.15	15.6542	1.00629	0.979377	1.02748	0.304193	0.999937	ENSG00000184347	SLIT3
ENSG00000036530.9	15.6603	-0.374187	1.00149	-0.373631	0.708679	0.999937	ENSG00000036530	CYP46A1
ENSG00000224729.6	15.692	0.762314	1.0091	0.755439	0.449986	0.999937	ENSG00000224729	PCOLCE-AS1
ENSG00000198691.13	15.7019	1.75802	1.10245	1.59464	0.110792	0.999937	ENSG00000198691	ABCA4
ENSG00000215483.11	15.7031	1.41369	1.12874	1.25245	0.210405	0.999937	ENSG00000215483	LINC00598
ENSG00000124466.9	15.7044	0.0707852	1.0289	0.0687971	0.945151	0.999937	ENSG00000124466	LYPD3
ENSG00000275793.1	15.7049	0.493924	3.10654	0.158995	0.873673	0.999937	ENSG00000275793	RIMBP3
ENSG00000286048.1	15.7084	0.500518	0.988396	0.506394	0.61258	0.999937	ENSG00000286048	AC008966.3
ENSG00000203812.2	15.7119	1.69269	3.95454	0.428038	0.668624	0.999937	ENSG00000203812	H2AC18
ENSG00000270882.2	15.7126	-3.68426	1.54239	-2.38867	0.0169094	0.999937	ENSG00000270882	H4C14
ENSG00000236886.2	15.7211	0.328334	1.02648	0.319863	0.749072	0.999937	ENSG00000236886	AC007563.2
ENSG00000278948.1	15.7242	0.204724	0.96705	0.2117	0.832341	0.999937	ENSG00000278948	AL031587.5
ENSG00000256001.2	15.7309	0.686136	1.05051	0.653148	0.513661	0.999937	ENSG00000256001	AC079949.1
ENSG00000204758.8	15.7313	0.156022	1.03302	0.151035	0.879948	0.999937	ENSG00000204758	AC008429.1
ENSG00000256092.2	15.7325	0.37388	0.975401	0.383309	0.701491	0.999937	ENSG00000256092	SBNO1-AS1
ENSG00000233183.3	15.7572	1.6542	1.23323	1.34135	0.179808	0.999937	ENSG00000233183	AL138889.1
ENSG00000261008.7	15.7651	1.2942	1.12867	1.14666	0.25152	0.999937	ENSG00000261008	LINC01572
ENSG00000198797.7	15.7706	0.142183	0.960135	0.148087	0.882274	0.999937	ENSG00000198797	BRINP2
ENSG00000183117.19	15.7741	3.37419	1.3136	2.56866	0.0102094	0.999937	ENSG00000183117	CSMD1
ENSG00000253327.2	15.7812	-0.881351	0.996907	-0.884086	0.37665	0.999937	ENSG00000253327	RAD21-AS1
ENSG00000260630.7	15.7957	0.446556	1.07656	0.414798	0.67829	0.999937	ENSG00000260630	SNAI3-AS1
ENSG00000261064.1	15.7969	-0.549993	0.962693	-0.571306	0.567792	0.999937	ENSG00000261064	LINC02256
ENSG00000196381.11	15.8026	0.533046	0.969113	0.550035	0.582295	0.999937	ENSG00000196381	ZNF781
ENSG00000232811.1	15.8062	-0.251303	0.96117	-0.261455	0.793742	0.999937	ENSG00000232811	AL360270.1
ENSG00000108825.18	15.8082	-1.328	1.03061	-1.28855	0.197553	0.999937	ENSG00000108825	PTGES3L-AARSD1
ENSG00000240591.2	15.8106	0.12164	1.02185	0.119039	0.905245	0.999937	ENSG00000240591	AL096701.3
ENSG00000179148.10	15.8132	1.25567	0.983401	1.27687	0.20165	0.999937	ENSG00000179148	ALOXE3
ENSG00000176244.7	15.8332	1.50597	1.02786	1.46514	0.142882	0.999937	ENSG00000176244	ACBD7
ENSG00000268713.1	15.8365	1.87033	3.80005	0.492186	0.622588	0.999937	ENSG00000268713	AC005261.3
ENSG00000268107.6	15.8392	-0.156414	1.18046	-0.132503	0.894587	0.999937	ENSG00000268107	AC003005.1
ENSG00000276337.1	15.8552	0.317809	0.965017	0.32933	0.741906	0.999937	ENSG00000276337	AC105429.1
ENSG00000180287.17	15.8579	-0.298262	0.954425	-0.312505	0.754657	0.999937	ENSG00000180287	PLD5
ENSG00000124915.10	15.8649	0.837481	0.977727	0.856559	0.391689	0.999937	ENSG00000124915	MYRF-AS1
ENSG00000286431.1	15.8714	0.0805348	0.972484	0.0828135	0.934	0.999937	ENSG00000286431	BX842570.1
ENSG00000231551.8	15.8716	-0.745706	0.972353	-0.766909	0.443136	0.999937	ENSG00000231551	AC245100.4
ENSG00000187867.10	15.8774	-0.16323	1.0037	-0.162629	0.870811	0.999937	ENSG00000187867	PALM3
ENSG00000227486.2	15.8888	0.730404	0.965816	0.756256	0.449496	0.999937	ENSG00000227486	AL050309.1
ENSG00000247416.4	15.8945	0.90971	0.997652	0.911852	0.361847	0.999937	ENSG00000247416	AP000802.1
ENSG00000154451.14	15.8967	4.05102	1.40676	2.87969	0.00398065	0.999937	ENSG00000154451	GBP5
ENSG00000251537.4	15.9018	-1.08988	1.09363	-0.996571	0.318973	0.999937	ENSG00000251537	AC005324.3
ENSG00000105492.16	15.9041	4.39409	1.52329	2.8846	0.00391916	0.999937	ENSG00000105492	SIGLEC6
ENSG00000181322.15	15.9051	0.57834	0.985274	0.586984	0.557215	0.999937	ENSG00000181322	NME9
ENSG00000269189.1	15.9083	-1.30242	1.12192	-1.16088	0.245689	0.999937	ENSG00000269189	AL445223.1
ENSG00000124249.7	15.9132	0.937291	1.00797	0.929879	0.352434	0.999937	ENSG00000124249	KCNK15
ENSG00000280330.1	15.9193	-0.508135	0.974606	-0.521375	0.602106	0.999937	ENSG00000280330	CTBP2P10
ENSG00000164398.15	15.9205	1.06953	1.15328	0.927379	0.35373	0.999937	ENSG00000164398	ACSL6
ENSG00000214353.8	15.9294	0.881368	1.07582	0.819252	0.412643	0.999937	ENSG00000214353	VAC14-AS1
ENSG00000204929.13	15.9296	0.100671	1.04467	0.0963663	0.92323	0.999937	ENSG00000204929	AC007389.1
ENSG00000102043.16	15.9333	-0.116884	1.08469	-0.107758	0.914188	0.999937	ENSG00000102043	MTMR8
ENSG00000265188.1	15.9398	-0.43231	0.97944	-0.441385	0.658934	0.999937	ENSG00000265188	AP001496.3
ENSG00000235142.10	15.942	0.877102	0.980116	0.894897	0.370842	0.999937	ENSG00000235142	LINC02532
ENSG00000240137.6	15.9646	-1.14787	1.02364	-1.12136	0.262134	0.999937	ENSG00000240137	ERICH6-AS1
ENSG00000224924.7	15.9647	3.11376	1.21895	2.55446	0.0106354	0.999937	ENSG00000224924	LINC00320
ENSG00000205946.1	15.9693	2.82592	1.54222	1.83237	0.0668966	0.999937	ENSG00000205946	USP17L6P
ENSG00000238113.7	15.9783	1.41636	1.11572	1.26946	0.204278	0.999937	ENSG00000238113	LINC01410
ENSG00000267512.1	15.9807	1.0893	0.963709	1.13032	0.258341	0.999937	ENSG00000267512	AC011446.1
ENSG00000204778.4	15.9826	-1.08175	1.41456	-0.764723	0.444436	0.999937	ENSG00000204778	CBWD4P
ENSG00000198125.13	15.9915	-0.372028	1.06225	-0.350225	0.72617	0.999937	ENSG00000198125	MB
ENSG00000279649.1	16.0003	0.30832	0.999486	0.308478	0.757718	0.999937	ENSG00000279649	AC020978.9
ENSG00000226232.8	16.0007	-0.792766	0.980742	-0.808333	0.418899	0.999937	ENSG00000226232	NPIPB14P
ENSG00000259366.1	16.0046	-0.748739	0.977058	-0.76632	0.443486	0.999937	ENSG00000259366	AC108449.2
ENSG00000060558.4	16.018	-0.166579	1.05469	-0.157941	0.874503	0.999937	ENSG00000060558	GNA15
ENSG00000225975.7	16.0246	0.755637	1.05706	0.714849	0.474702	0.999937	ENSG00000225975	LINC01534
ENSG00000171084.15	16.0276	-0.405778	0.982711	-0.412917	0.679667	0.999937	ENSG00000171084	FAM86JP
ENSG00000270959.1	16.0386	0.168158	0.994707	0.169053	0.865755	0.999937	ENSG00000270959	LPP-AS2
ENSG00000255284.2	16.0422	0.483336	0.95837	0.504332	0.614028	0.999937	ENSG00000255284	AP006621.3
ENSG00000172399.6	16.043	0.223466	1.04197	0.214464	0.830185	0.999937	ENSG00000172399	MYOZ2
ENSG00000099994.11	16.0453	0.735058	1.16731	0.629702	0.52889	0.999937	ENSG00000099994	SUSD2
ENSG00000121853.4	16.0511	-0.402857	0.980211	-0.41099	0.68108	0.999937	ENSG00000121853	GHSR
ENSG00000166546.14	16.054	1.79608	1.00899	1.78007	0.0750642	0.999937	ENSG00000166546	BEAN1
ENSG00000228672.4	16.0588	1.05546	1.00329	1.05201	0.292797	0.999937	ENSG00000228672	PROB1
ENSG00000260691.6	16.0622	0.117404	0.985694	0.119108	0.90519	0.999937	ENSG00000260691	ANKRD20A1
ENSG00000272630.1	16.0759	0.117829	1.00409	0.117349	0.906584	0.999937	ENSG00000272630	AL731563.3
ENSG00000174564.13	16.0837	-0.884015	1.14152	-0.77442	0.438683	0.999937	ENSG00000174564	IL20RB
ENSG00000139352.4	16.1022	-0.558861	1.01572	-0.550213	0.582173	0.999937	ENSG00000139352	ASCL1
ENSG00000274922.1	16.1087	0.985664	1.01472	0.971364	0.331367	0.999937	ENSG00000274922	AL139384.1
ENSG00000167612.13	16.1104	0.173584	1.01537	0.170956	0.864258	0.999937	ENSG00000167612	ANKRD33
ENSG00000230795.3	16.1136	1.08731	0.972208	1.11839	0.2634	0.999937	ENSG00000230795	HLA-K
ENSG00000286721.1	16.1145	-0.380433	1.03137	-0.368861	0.712231	0.999937	ENSG00000286721	AC010623.1
ENSG00000259529.2	16.1216	1.15026	1.02426	1.12302	0.261428	0.999937	ENSG00000259529	AL136295.5
ENSG00000270641.1	16.1218	1.07467	1.09432	0.982039	0.326081	0.999937	ENSG00000270641	TSIX
ENSG00000262211.1	16.1291	-0.777805	1.05485	-0.737362	0.460902	0.999937	ENSG00000262211	AC008914.1
ENSG00000151834.16	16.1305	2.00832	1.08061	1.85851	0.0630967	0.999937	ENSG00000151834	GABRA2
ENSG00000179362.14	16.1454	0.693341	0.971358	0.713786	0.47536	0.999937	ENSG00000179362	HMGN2P46
ENSG00000260233.3	16.1458	-0.195167	0.982422	-0.198659	0.842529	0.999937	ENSG00000260233	ZNRD2-AS1
ENSG00000145506.14	16.1488	0.459459	1.01781	0.451419	0.651688	0.999937	ENSG00000145506	NKD2
ENSG00000288044.1	16.1551	0.366572	0.966165	0.379409	0.704384	0.999937	ENSG00000288044	AL096870.10
ENSG00000162643.13	16.1559	0.0746493	0.995002	0.0750243	0.940195	0.999937	ENSG00000162643	WDR63
ENSG00000160973.8	16.1641	1.14513	0.965534	1.186	0.235621	0.999937	ENSG00000160973	FOXH1
ENSG00000124302.13	16.1668	0.380603	1.03423	0.368007	0.712868	0.999937	ENSG00000124302	CHST8
ENSG00000169856.9	16.1747	0.752732	1.00773	0.74696	0.455088	0.999937	ENSG00000169856	ONECUT1
ENSG00000176695.8	16.1785	0.718676	1.19071	0.603571	0.546129	0.999937	ENSG00000176695	OR4F17
ENSG00000138650.9	16.1806	0.201357	0.962628	0.209174	0.834312	0.999937	ENSG00000138650	PCDH10
ENSG00000143858.12	16.182	0.148018	1.11083	0.13325	0.893996	0.999937	ENSG00000143858	SYT2
ENSG00000286105.1	16.183	3.9183	1.35787	2.88563	0.00390629	0.999937	ENSG00000286105	AL353579.1
ENSG00000237840.6	16.1851	0.935068	1.09127	0.856859	0.391523	0.999937	ENSG00000237840	FAM21FP
ENSG00000215302.8	16.194	0.601956	0.964075	0.624387	0.532374	0.999937	ENSG00000215302	AC127502.1
ENSG00000251079.6	16.1966	-0.141674	1.02141	-0.138705	0.889683	0.999937	ENSG00000251079	BMS1P2
ENSG00000232079.7	16.1999	1.07314	1.18949	0.902189	0.366957	0.999937	ENSG00000232079	LINC01697
ENSG00000250714.3	16.2006	-0.217988	1.16097	-0.187764	0.851062	0.999937	ENSG00000250714	AC100861.2
ENSG00000038945.15	16.2044	1.34181	1.40039	0.958168	0.337978	0.999937	ENSG00000038945	MSR1
ENSG00000090932.11	16.2113	0.876588	0.99072	0.884799	0.376265	0.999937	ENSG00000090932	DLL3
ENSG00000283239.1	16.2137	-7.48891	3.84776	-1.9463	0.0516183	0.999937	ENSG00000283239	KBTBD11-OT1
ENSG00000119121.22	16.2207	1.31849	0.956201	1.37888	0.167932	0.999937	ENSG00000119121	TRPM6
ENSG00000267755.1	16.2313	0.12401	1.06731	0.11619	0.907502	0.999937	ENSG00000267755	AC005329.2
ENSG00000110799.14	16.2409	0.930603	1.0565	0.880837	0.378406	0.999937	ENSG00000110799	VWF
ENSG00000280011.1	16.2474	2.81873	1.22721	2.29687	0.0216261	0.999937	ENSG00000280011	AL031595.2
ENSG00000205940.8	16.2576	0.439575	1.03867	0.423211	0.672141	0.999937	ENSG00000205940	HSP90AB2P
ENSG00000230533.4	16.2603	0.0753889	0.996177	0.0756782	0.939675	0.999937	ENSG00000230533	AL356234.2
ENSG00000231871.5	16.2634	0.97316	0.955587	1.01839	0.308493	0.999937	ENSG00000231871	IPO9-AS1
ENSG00000228843.2	16.2722	1.10493	0.986629	1.1199	0.262755	0.999937	ENSG00000228843	AL133410.2
ENSG00000160886.13	16.2765	1.01999	1.02956	0.990706	0.321829	0.999937	ENSG00000160886	LY6K
ENSG00000196081.10	16.2798	0.762886	1.03305	0.738481	0.460222	0.999937	ENSG00000196081	ZNF724
ENSG00000224271.7	16.2814	2.55103	1.16461	2.19045	0.0284914	0.999937	ENSG00000224271	AL117329.1
ENSG00000260805.2	16.2927	0.891715	0.98973	0.900968	0.367605	0.999937	ENSG00000260805	AC092803.1
ENSG00000165731.20	16.3191	0.822789	0.987689	0.833045	0.404819	0.999937	ENSG00000165731	RET
ENSG00000107282.8	16.3198	0.412093	0.947198	0.435065	0.663515	0.999937	ENSG00000107282	APBA1
ENSG00000254531.1	16.3215	0.260827	0.948925	0.274866	0.78342	0.999937	ENSG00000254531	FLJ20021
ENSG00000007933.13	16.3245	0.646558	0.98336	0.657499	0.51086	0.999937	ENSG00000007933	FMO3
ENSG00000186417.14	16.3357	3.73445	1.27297	2.93365	0.00334999	0.999937	ENSG00000186417	GLDN
ENSG00000261189.1	16.3358	0.117949	0.956653	0.123294	0.901875	0.999937	ENSG00000261189	AL031058.1
ENSG00000187229.3	16.3588	-0.607468	0.972593	-0.624586	0.532243	0.999937	ENSG00000187229	AC100800.1
ENSG00000271869.1	16.3609	0.760717	0.980735	0.77566	0.43795	0.999937	ENSG00000271869	AC026979.2
ENSG00000286136.2	16.3634	-0.251996	0.978002	-0.257664	0.796666	0.999937	ENSG00000286136	AC107071.1
ENSG00000240875.6	16.3688	0.0743772	0.973355	0.0764132	0.93909	0.999937	ENSG00000240875	LINC00886
ENSG00000163220.11	16.3706	-0.972083	1.08385	-0.896881	0.369782	0.999937	ENSG00000163220	S100A9
ENSG00000114948.13	16.3738	0.13827	1.00186	0.138014	0.89023	0.999937	ENSG00000114948	ADAM23
ENSG00000119737.6	16.3807	-0.0628948	0.969163	-0.064896	0.948257	0.999937	ENSG00000119737	GPR75
ENSG00000226706.1	16.3834	-0.194414	0.957158	-0.203115	0.839045	0.999937	ENSG00000226706	AL161452.1
ENSG00000210135.1	16.3838	0.608312	1.0969	0.554572	0.579187	0.999937	ENSG00000210135	MT-TN
ENSG00000137474.22	16.3861	1.11689	1.01324	1.1023	0.270333	0.999937	ENSG00000137474	MYO7A
ENSG00000117016.10	16.3938	0.419997	1.04336	0.402545	0.687283	0.999937	ENSG00000117016	RIMS3
ENSG00000153294.12	16.3951	0.389372	0.986486	0.394706	0.69306	0.999937	ENSG00000153294	ADGRF4
ENSG00000046889.19	16.4006	1.42641	1.05148	1.35657	0.174919	0.999937	ENSG00000046889	PREX2
ENSG00000228436.3	16.4043	0.160945	0.949712	0.169467	0.865429	0.999937	ENSG00000228436	AL139260.1
ENSG00000273253.2	16.4143	-0.478445	0.952919	-0.502084	0.615609	0.999937	ENSG00000273253	AL022328.4
ENSG00000236107.10	16.4171	0.35705	0.983971	0.362867	0.716704	0.999937	ENSG00000236107	SCN1A-AS1
ENSG00000269987.1	16.4245	0.799561	0.996789	0.802137	0.422474	0.999937	ENSG00000269987	AC004542.2
ENSG00000131730.16	16.4451	0.108176	1.01036	0.107067	0.914736	0.999937	ENSG00000131730	CKMT2
ENSG00000182742.6	16.446	1.51742	1.12317	1.35102	0.17669	0.999937	ENSG00000182742	HOXB4
ENSG00000238000.1	16.4523	-0.0185419	0.988074	-0.0187657	0.985028	0.999937	ENSG00000238000	AC116347.1
ENSG00000227946.1	16.4532	0.438813	0.942096	0.465784	0.64137	0.999937	ENSG00000227946	AC007383.1
ENSG00000272812.1	16.4541	0.0198907	0.971054	0.0204837	0.983658	0.999937	ENSG00000272812	AC004908.2
ENSG00000285458.1	16.4702	0.251609	0.976418	0.257686	0.796649	0.999937	ENSG00000285458	AC093827.5
ENSG00000287126.1	16.4716	1.22152	1.12571	1.08512	0.277869	0.999937	ENSG00000287126	AC108488.3
ENSG00000279337.1	16.4717	3.13956	1.12871	2.78155	0.00541003	0.999937	ENSG00000279337	AC127024.7
ENSG00000162631.18	16.4769	1.03223	1.0311	1.0011	0.316779	0.999937	ENSG00000162631	NTNG1
ENSG00000141854.9	16.4811	0.868691	0.986301	0.880756	0.37845	0.999937	ENSG00000141854	MISP3
ENSG00000142224.16	16.484	1.29713	1.09542	1.18414	0.236359	0.999937	ENSG00000142224	IL19
ENSG00000183317.17	16.4855	1.66631	1.01879	1.63558	0.101927	0.999937	ENSG00000183317	EPHA10
ENSG00000136688.11	16.4877	1.44724	1.13983	1.2697	0.204192	0.999937	ENSG00000136688	IL36G
ENSG00000235568.7	16.4903	0.289934	0.976612	0.296878	0.76656	0.999937	ENSG00000235568	NFAM1
ENSG00000233355.7	16.4907	0.272967	1.01219	0.269681	0.787406	0.999937	ENSG00000233355	CHRM3-AS2
ENSG00000122386.11	16.4923	1.10208	0.978239	1.1266	0.259913	0.999937	ENSG00000122386	ZNF205
ENSG00000171044.11	16.4932	-0.00694034	0.951257	-0.00729597	0.994179	0.999937	ENSG00000171044	XKR6
ENSG00000168993.15	16.4962	1.22307	0.982351	1.24505	0.213115	0.999937	ENSG00000168993	CPLX1
ENSG00000175643.10	16.4969	2.6085	1.14345	2.28125	0.0225335	0.999937	ENSG00000175643	RMI2
ENSG00000287132.1	16.5056	0.111345	0.940604	0.118376	0.905769	0.999937	ENSG00000287132	AC092881.2
ENSG00000273729.1	16.512	0.832846	0.964406	0.863584	0.387816	0.999937	ENSG00000273729	AC007686.3
ENSG00000227706.4	16.5159	0.713961	1.05165	0.678893	0.497206	0.999937	ENSG00000227706	AL713998.1
ENSG00000198576.4	16.5203	1.88358	0.969786	1.94227	0.0521046	0.999937	ENSG00000198576	ARC
ENSG00000108018.15	16.521	1.88902	0.989274	1.9095	0.0561971	0.999937	ENSG00000108018	SORCS1
ENSG00000160207.9	16.5222	0.127899	0.980142	0.13049	0.896178	0.999937	ENSG00000160207	HSF2BP
ENSG00000232229.6	16.5232	1.26102	1.03718	1.21581	0.224055	0.999937	ENSG00000232229	LINC00865
ENSG00000272666.1	16.5357	-0.494699	1.00215	-0.493639	0.621561	0.999937	ENSG00000272666	KLHDC7B-DT
ENSG00000261220.2	16.5383	1.50483	1.00671	1.4948	0.134966	0.999937	ENSG00000261220	AC103706.1
ENSG00000135697.10	16.5436	0.326962	0.953403	0.342942	0.731642	0.999937	ENSG00000135697	BCO1
ENSG00000161664.7	16.5565	0.344325	0.950594	0.362221	0.717187	0.999937	ENSG00000161664	ASB16
ENSG00000272141.1	16.5615	1.81749	0.998075	1.821	0.0686069	0.999937	ENSG00000272141	AL390719.2
ENSG00000284606.1	16.5745	-1.09652	1.04884	-1.04547	0.295807	0.999937	ENSG00000284606	AC105233.4
ENSG00000205683.11	16.5866	1.08285	1.0111	1.07097	0.284184	0.999937	ENSG00000205683	DPF3
ENSG00000228022.6	16.5879	-0.190743	0.952807	-0.20019	0.841332	0.999937	ENSG00000228022	HCG20
ENSG00000224536.2	16.5969	0.739139	0.947354	0.780215	0.435264	0.999937	ENSG00000224536	AC096677.1
ENSG00000197483.10	16.6016	1.45668	1.05548	1.38012	0.167551	0.999937	ENSG00000197483	ZNF628
ENSG00000273274.2	16.6093	1.7749	1.06141	1.67221	0.0944828	0.999937	ENSG00000273274	ZBTB8B
ENSG00000105048.17	16.6124	0.6419	1.09205	0.587792	0.556672	0.999937	ENSG00000105048	TNNT1
ENSG00000237188.5	16.6125	0.613731	0.977587	0.627802	0.530134	0.999937	ENSG00000237188	AC242426.2
ENSG00000137463.5	16.6125	-0.313551	1.20189	-0.260881	0.794184	0.999937	ENSG00000137463	MGARP
ENSG00000267077.1	16.615	0.496183	0.95818	0.51784	0.60457	0.999937	ENSG00000267077	AC020663.2
ENSG00000245685.7	16.6174	1.34423	1.08239	1.2419	0.214272	0.999937	ENSG00000245685	FRG1-DT
ENSG00000143847.15	16.6342	1.34226	1.06111	1.26496	0.205886	0.999937	ENSG00000143847	PPFIA4
ENSG00000249593.6	16.6371	-0.330515	0.939889	-0.351653	0.725099	0.999937	ENSG00000249593	AC011405.1
ENSG00000266200.6	16.6416	0.158579	1.17308	0.135181	0.892468	0.999937	ENSG00000266200	PNLIPRP2
ENSG00000135144.7	16.6465	0.169778	0.944363	0.179781	0.857325	0.999937	ENSG00000135144	DTX1
ENSG00000136881.12	16.6547	0.806616	1.09115	0.739232	0.459766	0.999937	ENSG00000136881	BAAT
ENSG00000070601.10	16.6581	1.12576	1.06731	1.05477	0.291532	0.999937	ENSG00000070601	FRMPD1
ENSG00000111728.10	16.663	-0.198326	1.0481	-0.189224	0.849917	0.999937	ENSG00000111728	ST8SIA1
ENSG00000276517.1	16.6714	-0.0378771	1.12576	-0.0336456	0.97316	0.999937	ENSG00000276517	AL133243.3
ENSG00000179023.8	16.6726	0.541276	1.08214	0.500191	0.61694	0.999937	ENSG00000179023	KLHDC7A
ENSG00000158402.20	16.6763	0.0655946	0.952676	0.0688529	0.945107	0.999937	ENSG00000158402	CDC25C
ENSG00000255823.5	16.6887	0.315851	1.04232	0.303025	0.761871	0.999937	ENSG00000255823	MTRNR2L8
ENSG00000261093.1	16.6931	0.524593	0.937686	0.559455	0.575851	0.999937	ENSG00000261093	AC141586.3
ENSG00000273261.1	16.699	0.436168	0.952805	0.457772	0.647116	0.999937	ENSG00000273261	AC092953.2
ENSG00000179869.15	16.7003	-0.318433	1.18235	-0.269321	0.787682	0.999937	ENSG00000179869	ABCA13
ENSG00000167207.13	16.7123	0.517188	1.00428	0.514986	0.606563	0.999937	ENSG00000167207	NOD2
ENSG00000260924.2	16.7206	0.279993	1.06525	0.262842	0.792673	0.999937	ENSG00000260924	LINC01311
ENSG00000178821.13	16.7275	-0.550864	1.24451	-0.442635	0.658029	0.999937	ENSG00000178821	TMEM52
ENSG00000241945.8	16.7326	-0.0211637	1.08935	-0.0194278	0.9845	0.999937	ENSG00000241945	PWP2
ENSG00000231991.4	16.744	0.459904	0.955025	0.481563	0.630117	0.999937	ENSG00000231991	ANXA2P2
ENSG00000287624.1	16.7452	-0.0464282	0.93616	-0.0495943	0.960446	0.999937	ENSG00000287624	AL590666.5
ENSG00000151079.7	16.754	1.22154	1.12223	1.0885	0.276375	0.999937	ENSG00000151079	KCNA6
ENSG00000242759.8	16.7625	-0.387407	1.04998	-0.368965	0.712154	0.999937	ENSG00000242759	LINC00882
ENSG00000198915.12	16.7652	-0.164884	0.930426	-0.177213	0.859341	0.999937	ENSG00000198915	RASGEF1A
ENSG00000215784.6	16.7695	0.536198	0.980951	0.54661	0.584647	0.999937	ENSG00000215784	FAM72D
ENSG00000174844.14	16.7743	-1.33657	0.979533	-1.3645	0.17241	0.999937	ENSG00000174844	DNAH12
ENSG00000163093.12	16.7855	-0.269978	0.950188	-0.284131	0.77631	0.999937	ENSG00000163093	BBS5
ENSG00000272030.1	16.7885	0.0996692	1.0064	0.099035	0.92111	0.999937	ENSG00000272030	AL162258.2
ENSG00000151006.7	16.8057	0.81792	1.05419	0.775876	0.437822	0.999937	ENSG00000151006	PRSS53
ENSG00000134955.12	16.8064	0.440292	1.02543	0.429373	0.667652	0.999937	ENSG00000134955	SLC37A2
ENSG00000075461.6	16.8084	1.31361	0.967893	1.35718	0.174723	0.999937	ENSG00000075461	CACNG4
ENSG00000279227.1	16.8113	-0.262178	0.963199	-0.272195	0.785472	0.999937	ENSG00000279227	AC009303.4
ENSG00000256056.1	16.8117	0.00455908	0.96463	0.00472625	0.996229	0.999937	ENSG00000256056	AC087257.2
ENSG00000241644.2	16.8172	1.61418	0.945736	1.7068	0.0878588	0.999937	ENSG00000241644	INMT
ENSG00000240476.1	16.8176	1.47218	1.07246	1.37271	0.169841	0.999937	ENSG00000240476	LINC00973
ENSG00000198795.11	16.8388	1.21324	1.01147	1.19949	0.230339	0.999937	ENSG00000198795	ZNF521
ENSG00000267838.2	16.8474	-0.277556	0.945519	-0.293549	0.769103	0.999937	ENSG00000267838	AC245884.8
ENSG00000170190.16	16.854	-0.509852	0.966816	-0.527352	0.597949	0.999937	ENSG00000170190	SLC16A5
ENSG00000005471.18	16.8642	0.824473	0.938348	0.878643	0.379595	0.999937	ENSG00000005471	ABCB4
ENSG00000164488.12	16.8651	1.22295	0.990813	1.23429	0.217096	0.999937	ENSG00000164488	DACT2
ENSG00000152583.12	16.8661	0.00538332	0.942052	0.00571447	0.995441	0.999937	ENSG00000152583	SPARCL1
ENSG00000233974.3	16.8781	0.3604	0.961573	0.374802	0.707808	0.999937	ENSG00000233974	AC138951.1
ENSG00000259071.1	16.8814	0.0154217	0.946125	0.0162999	0.986995	0.999937	ENSG00000259071	AL359397.2
ENSG00000101695.9	16.882	-0.0160616	1.01187	-0.0158732	0.987336	0.999937	ENSG00000101695	RNF125
ENSG00000279119.1	16.8864	-0.148261	1.19674	-0.123887	0.901404	0.999937	ENSG00000279119	AC006449.7
ENSG00000170011.14	16.8877	-0.854486	0.940419	-0.908623	0.363549	0.999937	ENSG00000170011	MYRIP
ENSG00000287576.1	16.8961	0.162885	0.956342	0.170321	0.864758	0.999937	ENSG00000287576	AC067930.8
ENSG00000237686.7	16.9001	1.80095	1.0072	1.78808	0.073763	0.999937	ENSG00000237686	AL109615.3
ENSG00000261071.1	16.9114	0.0943379	0.963151	0.0979472	0.921974	0.999937	ENSG00000261071	AL441883.1
ENSG00000077943.8	16.923	0.778339	1.07301	0.725381	0.468218	0.999937	ENSG00000077943	ITGA8
ENSG00000102032.13	16.9253	0.355816	0.943481	0.377131	0.706076	0.999937	ENSG00000102032	RENBP
ENSG00000186007.10	16.9263	-0.370764	1.25745	-0.294854	0.768105	0.999937	ENSG00000186007	LEMD1
ENSG00000232611.1	16.9312	0.374274	0.949753	0.394075	0.693526	0.999937	ENSG00000232611	AL683813.2
ENSG00000118004.18	16.9319	0.434403	0.977868	0.444235	0.656873	0.999937	ENSG00000118004	COLEC11
ENSG00000099866.15	16.9391	0.347916	1.0933	0.318227	0.750313	0.999937	ENSG00000099866	MADCAM1
ENSG00000197410.14	16.9396	1.59913	1.23591	1.29389	0.195702	0.999937	ENSG00000197410	DCHS2
ENSG00000150471.16	16.9451	2.65048	1.35769	1.95219	0.0509151	0.999937	ENSG00000150471	ADGRL3
ENSG00000259994.1	16.9549	-0.12297	0.947964	-0.12972	0.896788	0.999937	ENSG00000259994	AL353796.1
ENSG00000186615.11	16.9691	0.345128	1.00881	0.342113	0.732266	0.999937	ENSG00000186615	KTN1-AS1
ENSG00000237950.3	16.9708	0.896468	0.952017	0.941652	0.346371	0.999937	ENSG00000237950	AL357079.1
ENSG00000005379.17	16.9782	0.315477	0.993269	0.317615	0.750777	0.999937	ENSG00000005379	TSPOAP1
ENSG00000149534.9	16.9848	2.20428	1.40267	1.57148	0.11607	0.999937	ENSG00000149534	MS4A2
ENSG00000138606.19	16.9914	1.73404	0.961063	1.80429	0.0711857	0.999937	ENSG00000138606	SHF
ENSG00000227906.8	16.9933	-0.514027	0.960823	-0.534986	0.592659	0.999937	ENSG00000227906	SNAP25-AS1
ENSG00000176387.7	16.9974	-0.292477	1.01405	-0.288424	0.773022	0.999937	ENSG00000176387	HSD11B2
ENSG00000176435.7	17.0026	0.971039	1.1206	0.866537	0.386196	0.999937	ENSG00000176435	CLEC14A
ENSG00000286623.1	17.0055	-0.30632	0.942579	-0.324981	0.745196	0.999937	ENSG00000286623	AC005041.4
ENSG00000229273.1	17.0156	-0.220467	0.984297	-0.223984	0.82277	0.999937	ENSG00000229273	BX664615.1
ENSG00000223573.7	17.0229	1.50993	1.05943	1.42523	0.15409	0.999937	ENSG00000223573	TINCR
ENSG00000255629.1	17.025	0.302686	0.94803	0.319279	0.749515	0.999937	ENSG00000255629	AC025576.1
ENSG00000170276.6	17.0293	1.33864	1.17516	1.13911	0.254658	0.999937	ENSG00000170276	HSPB2
ENSG00000132932.17	17.0307	0.0940999	1.0028	0.0938374	0.925238	0.999937	ENSG00000132932	ATP8A2
ENSG00000258311.5	17.0519	0.945954	0.976303	0.968915	0.332588	0.999937	ENSG00000258311	AC009779.3
ENSG00000274421.1	17.0775	0.426297	0.957362	0.445283	0.656115	0.999937	ENSG00000274421	AL162390.1
ENSG00000138622.4	17.0791	1.13164	0.961615	1.17681	0.23927	0.999937	ENSG00000138622	HCN4
ENSG00000234773.7	17.084	-0.0880316	0.957461	-0.0919428	0.926743	0.999937	ENSG00000234773	AC012618.3
ENSG00000280088.1	17.0857	-0.362935	0.936395	-0.387587	0.698322	0.999937	ENSG00000280088	AC126474.2
ENSG00000158125.10	17.0858	1.88992	1.02206	1.84913	0.0644389	0.999937	ENSG00000158125	XDH
ENSG00000102048.16	17.0891	-0.20342	0.970894	-0.209518	0.834044	0.999937	ENSG00000102048	ASB9
ENSG00000110057.8	17.0994	0.285696	1.00415	0.284516	0.776015	0.999937	ENSG00000110057	UNC93B1
ENSG00000287271.1	17.0999	0.500615	0.939603	0.532794	0.594176	0.999937	ENSG00000287271	AC011455.6
ENSG00000259522.3	17.1039	1.10643	3.22149	0.343453	0.731257	0.999937	ENSG00000259522	AL136295.4
ENSG00000279442.1	17.1104	3.44862	1.29185	2.66951	0.00759615	0.999937	ENSG00000279442	AP000542.2
ENSG00000174576.10	17.1203	0.425786	1.00843	0.422228	0.672859	0.999937	ENSG00000174576	NPAS4
ENSG00000100302.7	17.1246	0.842773	0.986862	0.853992	0.393109	0.999937	ENSG00000100302	RASD2
ENSG00000288531.1	17.143	0.30344	0.987435	0.307301	0.758614	0.999937	ENSG00000288531	AL669831.7
ENSG00000257335.8	17.1501	2.86695	1.11797	2.56443	0.0103345	0.999937	ENSG00000257335	MGAM
ENSG00000223756.7	17.1526	0.977672	1.05298	0.928481	0.353158	0.999937	ENSG00000223756	TSSC2
ENSG00000286891.1	17.1584	2.48425	1.1467	2.16643	0.0302782	0.999937	ENSG00000286891	AC080132.1
ENSG00000280355.1	17.1685	-0.727148	0.968587	-0.750731	0.452815	0.999937	ENSG00000280355	AL132656.4
ENSG00000140873.16	17.1715	-0.490908	0.965446	-0.508478	0.611118	0.999937	ENSG00000140873	ADAMTS18
ENSG00000265399.1	17.1722	-0.428092	0.952347	-0.449513	0.653062	0.999937	ENSG00000265399	AP005329.2
ENSG00000240771.8	17.1774	0.270606	0.962816	0.281056	0.778667	0.999937	ENSG00000240771	ARHGEF25
ENSG00000137273.6	17.1877	1.1553	1.06266	1.08717	0.27696	0.999937	ENSG00000137273	FOXF2
ENSG00000126353.3	17.208	0.927311	1.20894	0.767045	0.443055	0.999937	ENSG00000126353	CCR7
ENSG00000162711.18	17.2104	0.921365	1.12695	0.817572	0.413602	0.999937	ENSG00000162711	NLRP3
ENSG00000204706.14	17.2162	0.446048	1.03198	0.432224	0.665579	0.999937	ENSG00000204706	MAMDC2-AS1
ENSG00000259349.2	17.2229	0.539826	1.02538	0.526464	0.598566	0.999937	ENSG00000259349	AC011921.1
ENSG00000262454.4	17.2238	-0.299299	1.04534	-0.286316	0.774636	0.999937	ENSG00000262454	MIR193BHG
ENSG00000282772.1	17.2244	-0.052297	0.935148	-0.0559237	0.955403	0.999937	ENSG00000282772	AL358790.1
ENSG00000159247.13	17.2283	0.529801	0.935105	0.566568	0.571008	0.999937	ENSG00000159247	TUBBP5
ENSG00000117983.17	17.2308	-2.04307	3.32986	-0.61356	0.539506	0.999937	ENSG00000117983	MUC5B
ENSG00000255517.6	17.2308	0.341795	0.948556	0.360331	0.718599	0.999937	ENSG00000255517	AP002748.4
ENSG00000178522.14	17.2464	1.63354	1.13801	1.43544	0.151163	0.999937	ENSG00000178522	AMBN
ENSG00000271335.6	17.2497	0.832696	0.938973	0.886816	0.375178	0.999937	ENSG00000271335	AL117336.2
ENSG00000168229.4	17.2509	0.183641	1.04247	0.17616	0.860168	0.999937	ENSG00000168229	PTGDR
ENSG00000135740.17	17.2511	-0.569018	0.955928	-0.595252	0.551675	0.999937	ENSG00000135740	SLC9A5
ENSG00000271730.1	17.2559	-0.688796	0.940171	-0.732629	0.463785	0.999937	ENSG00000271730	AL390208.1
ENSG00000243679.1	17.2563	0.0623092	0.940682	0.0662384	0.947188	0.999937	ENSG00000243679	AC018638.5
ENSG00000159496.14	17.2575	1.11435	1.0497	1.06159	0.288421	0.999937	ENSG00000159496	RGL4
ENSG00000132000.13	17.2588	-0.720942	1.07745	-0.669119	0.50342	0.999937	ENSG00000132000	PODNL1
ENSG00000273507.5	17.2631	0.511082	0.999288	0.511446	0.609039	0.999937	ENSG00000273507	AL354809.1
ENSG00000249731.1	17.266	1.28222	1.05783	1.21212	0.225467	0.999937	ENSG00000249731	AC126768.2
ENSG00000122025.15	17.2686	-1.23895	1.13058	-1.09586	0.273141	0.999937	ENSG00000122025	FLT3
ENSG00000165874.13	17.2751	1.02066	1.12188	0.909779	0.362939	0.999937	ENSG00000165874	SHLD2P1
ENSG00000271270.7	17.2753	-0.71277	0.93871	-0.759308	0.447668	0.999937	ENSG00000271270	TMCC1-AS1
ENSG00000257298.1	17.2775	0.848768	0.961294	0.882943	0.377267	0.999937	ENSG00000257298	AC008147.2
ENSG00000246250.3	17.2824	0.264456	0.934616	0.282957	0.77721	0.999937	ENSG00000246250	AC087521.2
ENSG00000248994.2	17.2828	1.62657	1.11263	1.46192	0.143763	0.999937	ENSG00000248994	AC124852.1
ENSG00000146352.13	17.2876	0.184951	1.32876	0.13919	0.8893	0.999937	ENSG00000146352	CLVS2
ENSG00000254762.1	17.299	-0.0731317	0.932305	-0.0784418	0.937477	0.999937	ENSG00000254762	AP001107.7
ENSG00000257524.6	17.3008	3.20587	1.17659	2.7247	0.00643592	0.999937	ENSG00000257524	AL157935.2
ENSG00000272990.1	17.3023	1.12951	1.02686	1.09996	0.271348	0.999937	ENSG00000272990	AC084036.1
ENSG00000121905.10	17.3035	0.387419	0.963137	0.402247	0.687502	0.999937	ENSG00000121905	HPCA
ENSG00000258064.1	17.3108	-1.888	1.10981	-1.7012	0.0889063	0.999937	ENSG00000258064	AC073612.1
ENSG00000198049.7	17.3171	0.760797	1.00058	0.760358	0.44704	0.999937	ENSG00000198049	AVPR1B
ENSG00000224165.6	17.3183	-0.347834	0.979881	-0.354976	0.722608	0.999937	ENSG00000224165	DNAJC27-AS1
ENSG00000023892.11	17.3233	1.1407	0.943682	1.20878	0.226748	0.999937	ENSG00000023892	DEF6
ENSG00000160051.12	17.3249	-0.329482	0.923406	-0.356811	0.721233	0.999937	ENSG00000160051	IQCC
ENSG00000080709.16	17.3299	0.282325	0.973368	0.290049	0.771779	0.999937	ENSG00000080709	KCNN2
ENSG00000150873.12	17.3329	1.86771	1.04106	1.79405	0.0728055	0.999937	ENSG00000150873	C2orf50
ENSG00000140451.13	17.3463	0.878477	1.01898	0.862111	0.388627	0.999937	ENSG00000140451	PIF1
ENSG00000276278.1	17.3464	-0.605783	0.92563	-0.654455	0.512819	0.999937	ENSG00000276278	AC048382.6
ENSG00000204065.3	17.3498	0.110393	0.988143	0.111717	0.911047	0.999937	ENSG00000204065	TCEAL5
ENSG00000232527.8	17.3578	-0.360568	1.05803	-0.340791	0.733261	0.999937	ENSG00000232527	LINC02802
ENSG00000266947.1	17.3598	0.140934	0.920844	0.153049	0.87836	0.999937	ENSG00000266947	AC022916.1
ENSG00000273382.1	17.361	-0.216433	0.924694	-0.234059	0.814939	0.999937	ENSG00000273382	AL356488.3
ENSG00000154065.17	17.3697	-0.287004	0.978667	-0.29326	0.769323	0.999937	ENSG00000154065	ANKRD29
ENSG00000233783.8	17.3762	-0.385191	0.998811	-0.385649	0.699757	0.999937	ENSG00000233783	AP001442.1
ENSG00000188906.16	17.3768	1.43466	0.936288	1.53229	0.125451	0.999937	ENSG00000188906	LRRK2
ENSG00000229227.8	17.3788	-0.147224	0.931717	-0.158013	0.874446	0.999937	ENSG00000229227	AL356056.1
ENSG00000139351.15	17.3793	-0.0990033	0.92308	-0.107253	0.914588	0.999937	ENSG00000139351	SYCP3
ENSG00000065618.21	17.3834	2.81165	1.13235	2.48301	0.0130276	0.999937	ENSG00000065618	COL17A1
ENSG00000197083.11	17.3871	-0.942855	0.954248	-0.98806	0.323123	0.999937	ENSG00000197083	ZNF300P1
ENSG00000260288.4	17.39	1.11244	1.07591	1.03395	0.301159	0.999937	ENSG00000260288	AC019294.2
ENSG00000198785.7	17.4028	0.715644	1.04774	0.683034	0.494585	0.999937	ENSG00000198785	GRIN3A
ENSG00000188610.12	17.4162	0.142642	0.926559	0.153948	0.877651	0.999937	ENSG00000188610	FAM72B
ENSG00000142677.4	17.4248	-0.140416	1.05492	-0.133106	0.894109	0.999937	ENSG00000142677	IL22RA1
ENSG00000276107.1	17.4276	0.337206	0.982124	0.343344	0.73134	0.999937	ENSG00000276107	AC037198.1
ENSG00000204963.6	17.4305	0.261834	0.981562	0.266752	0.78966	0.999937	ENSG00000204963	PCDHA7
ENSG00000227954.7	17.4361	0.45285	0.979006	0.462561	0.643679	0.999937	ENSG00000227954	TARID
ENSG00000163751.4	17.443	0.914239	1.10152	0.829976	0.406553	0.999937	ENSG00000163751	CPA3
ENSG00000249550.7	17.4456	2.1729	1.24517	1.74507	0.0809734	0.999937	ENSG00000249550	LINC01234
ENSG00000174236.4	17.4518	-0.195555	0.977872	-0.19998	0.841496	0.999937	ENSG00000174236	REP15
ENSG00000179978.11	17.4541	-2.37141	1.1393	-2.08146	0.0373921	0.999937	ENSG00000179978	NAIPP2
ENSG00000217648.1	17.4546	-0.155725	0.935254	-0.166506	0.867759	0.999937	ENSG00000217648	AL136116.3
ENSG00000268584.1	17.4634	-0.0819416	0.994353	-0.082407	0.934323	0.999937	ENSG00000268584	AC073389.1
ENSG00000224093.5	17.4668	-0.773062	0.948208	-0.815288	0.414908	0.999937	ENSG00000224093	BCAR3-AS1
ENSG00000183066.14	17.4685	0.572793	0.942557	0.607701	0.543386	0.999937	ENSG00000183066	WBP2NL
ENSG00000137392.10	17.4736	2.01997	1.22065	1.65483	0.0979596	0.999937	ENSG00000137392	CLPS
ENSG00000164764.11	17.4741	0.00444933	0.936147	0.00475281	0.996208	0.999937	ENSG00000164764	SBSPON
ENSG00000221916.4	17.4919	-1.06307	1.03701	-1.02512	0.305306	0.999937	ENSG00000221916	C19orf73
ENSG00000187323.12	17.4992	2.25807	1.02614	2.20054	0.0277685	0.999937	ENSG00000187323	DCC
ENSG00000229236.3	17.4994	0.646899	1.05575	0.61274	0.540049	0.999937	ENSG00000229236	TTTY10
ENSG00000171045.16	17.4994	0.0850009	0.926454	0.0917486	0.926898	0.999937	ENSG00000171045	TSNARE1
ENSG00000105784.15	17.5257	0.37611	0.935913	0.401864	0.687784	0.999937	ENSG00000105784	RUNDC3B
ENSG00000261777.6	17.5299	-0.874822	0.966312	-0.90532	0.365296	0.999937	ENSG00000261777	AC012184.3
ENSG00000227409.1	17.5332	-0.443435	0.958979	-0.462403	0.643792	0.999937	ENSG00000227409	ZMYM4-AS1
ENSG00000121211.8	17.5412	-0.354855	1.07249	-0.330869	0.740744	0.999937	ENSG00000121211	MND1
ENSG00000236883.1	17.5431	0.450319	0.940936	0.478586	0.632233	0.999937	ENSG00000236883	AP001615.1
ENSG00000278983.1	17.55	0.617934	0.951918	0.649146	0.516244	0.999937	ENSG00000278983	AC048380.2
ENSG00000277501.1	17.5563	1.02864	0.981697	1.04781	0.294725	0.999937	ENSG00000277501	AC243571.2
ENSG00000115423.19	17.5577	0.697993	1.16143	0.600979	0.547854	0.999937	ENSG00000115423	DNAH6
ENSG00000285996.1	17.5603	-0.0317993	0.922804	-0.0344595	0.972511	0.999937	ENSG00000285996	AC006116.10
ENSG00000285103.2	17.5616	0.145137	0.914749	0.158663	0.873934	0.999937	ENSG00000285103	AL451123.1
ENSG00000136895.19	17.5623	0.611949	0.951885	0.642882	0.520301	0.999937	ENSG00000136895	GARNL3
ENSG00000122824.11	17.5667	0.972522	0.988206	0.984129	0.325052	0.999937	ENSG00000122824	NUDT10
ENSG00000260459.2	17.567	-0.732415	0.931675	-0.786128	0.431793	0.999937	ENSG00000260459	FTLP14
ENSG00000220583.1	17.5698	-0.868197	0.97114	-0.893998	0.371323	0.999937	ENSG00000220583	RPL35P2
ENSG00000236540.7	17.5789	0.672412	0.924081	0.727655	0.466825	0.999937	ENSG00000236540	AC006547.1
ENSG00000228956.8	17.5824	1.24542	1.04964	1.18652	0.235418	0.999937	ENSG00000228956	SATB1-AS1
ENSG00000246100.4	17.5919	0.226106	1.0103	0.223801	0.822912	0.999937	ENSG00000246100	LINC00900
ENSG00000287769.1	17.592	-0.140981	0.922488	-0.152827	0.878535	0.999937	ENSG00000287769	AL353748.3
ENSG00000187260.16	17.596	0.0968652	0.982607	0.0985798	0.921472	0.999937	ENSG00000187260	WDR86
ENSG00000267026.5	17.599	0.171039	0.941437	0.181679	0.855835	0.999937	ENSG00000267026	AL136084.1
ENSG00000085552.17	17.6017	1.01625	1.00926	1.00692	0.313972	0.999937	ENSG00000085552	IGSF9
ENSG00000259834.1	17.6108	2.88479	1.12665	2.56051	0.0104519	0.999937	ENSG00000259834	AL365361.1
ENSG00000177025.3	17.6114	-0.00232117	0.952295	-0.00243745	0.998055	0.999937	ENSG00000177025	C19orf18
ENSG00000280213.1	17.6135	0.886862	0.977611	0.907172	0.364316	0.999937	ENSG00000280213	UCKL1-AS1
ENSG00000267481.1	17.6161	-0.307597	0.998424	-0.308083	0.758019	0.999937	ENSG00000267481	AC011477.1
ENSG00000167077.13	17.6165	-0.164943	0.931754	-0.177024	0.859489	0.999937	ENSG00000167077	MEI1
ENSG00000182580.3	17.6174	1.16555	1.03839	1.12246	0.261668	0.999937	ENSG00000182580	EPHB3
ENSG00000228393.4	17.6229	0.0692436	0.970637	0.0713383	0.943129	0.999937	ENSG00000228393	LINC01004
ENSG00000210194.1	17.6294	2.2104	1.11214	1.98752	0.0468648	0.999937	ENSG00000210194	MT-TE
ENSG00000186212.4	17.6303	1.25368	0.947614	1.32298	0.185841	0.999937	ENSG00000186212	SOWAHB
ENSG00000233251.8	17.6342	1.16696	1.02715	1.13611	0.25591	0.999937	ENSG00000233251	AC007743.1
ENSG00000286746.1	17.6357	1.00853	1.09415	0.921747	0.35666	0.999937	ENSG00000286746	AL590807.1
ENSG00000273784.4	17.6475	-0.891981	0.944318	-0.944577	0.344875	0.999937	ENSG00000273784	AL137058.2
ENSG00000235314.1	17.6607	0.351396	0.914719	0.384158	0.700862	0.999937	ENSG00000235314	LINC00957
ENSG00000102524.11	17.6613	0.21689	1.04872	0.206814	0.836155	0.999937	ENSG00000102524	TNFSF13B
ENSG00000112319.19	17.6645	0.128012	0.939388	0.136272	0.891606	0.999937	ENSG00000112319	EYA4
ENSG00000183785.15	17.6682	-0.856738	1.15282	-0.743169	0.457379	0.999937	ENSG00000183785	TUBA8
ENSG00000026036.22	17.6739	1.77985	0.987967	1.80153	0.0716199	0.999937	ENSG00000026036	RTEL1-TNFRSF6B
ENSG00000276203.5	17.6745	1.10481	1.07073	1.03182	0.302155	0.999937	ENSG00000276203	ANKRD20A3P
ENSG00000282033.1	17.6755	0.618397	0.932741	0.662989	0.507338	0.999937	ENSG00000282033	AC074387.1
ENSG00000268173.3	17.6756	8.02505	3.84793	2.08555	0.0370194	0.999937	ENSG00000268173	AC007192.1
ENSG00000082497.12	17.6938	1.00369	0.952831	1.05337	0.29217	0.999937	ENSG00000082497	SERTAD4
ENSG00000169594.13	17.6974	0.584072	1.08993	0.535881	0.592041	0.999937	ENSG00000169594	BNC1
ENSG00000260404.3	17.6979	-3.53218	1.09229	-3.23372	0.00122189	0.999937	ENSG00000260404	AC110079.1
ENSG00000173013.6	17.7035	1.02549	0.969134	1.05815	0.289987	0.999937	ENSG00000173013	CCDC96
ENSG00000160180.15	17.705	-0.130064	0.958639	-0.135676	0.892077	0.999937	ENSG00000160180	TFF3
ENSG00000008277.14	17.7125	0.682727	0.995333	0.685928	0.492758	0.999937	ENSG00000008277	ADAM22
ENSG00000249884.8	17.7138	0.962929	1.00714	0.956102	0.339021	0.999937	ENSG00000249884	RNF103-CHMP3
ENSG00000171889.5	17.7303	0.20057	0.946931	0.21181	0.832255	0.999937	ENSG00000171889	MIR31HG
ENSG00000035499.13	17.7322	0.717838	0.921876	0.778671	0.436174	0.999937	ENSG00000035499	DEPDC1B
ENSG00000285667.1	17.7341	0.271469	0.91864	0.295511	0.767603	0.999937	ENSG00000285667	AC012291.3
ENSG00000279377.1	17.7443	2.15615	1.19957	1.79743	0.0722674	0.999937	ENSG00000279377	AC003973.2
ENSG00000165269.13	17.7444	0.636833	1.01273	0.62883	0.52946	0.999937	ENSG00000165269	AQP7
ENSG00000169509.6	17.7476	-1.49242	1.23028	-1.21308	0.2251	0.999937	ENSG00000169509	CRCT1
ENSG00000154162.15	17.7658	3.42069	1.24136	2.75559	0.00585872	0.999937	ENSG00000154162	CDH12
ENSG00000260853.2	17.7688	1.78628	0.98978	1.80473	0.0711172	0.999937	ENSG00000260853	AC109460.2
ENSG00000181215.15	17.7707	0.681526	1.10027	0.619418	0.535641	0.999937	ENSG00000181215	C4orf50
ENSG00000255389.1	17.7743	-0.345224	0.931914	-0.370446	0.71105	0.999937	ENSG00000255389	Z97989.1
ENSG00000107165.13	17.7785	-0.0474625	0.932946	-0.0508739	0.959426	0.999937	ENSG00000107165	TYRP1
ENSG00000272462.3	17.7796	0.983204	0.928763	1.05862	0.289774	0.999937	ENSG00000272462	U91328.1
ENSG00000122420.10	17.7918	-0.395833	0.971136	-0.407598	0.683569	0.999937	ENSG00000122420	PTGFR
ENSG00000140287.11	17.7936	1.61834	1.38091	1.17194	0.241222	0.999937	ENSG00000140287	HDC
ENSG00000198939.8	17.8009	0.206552	1.0107	0.204366	0.838068	0.999937	ENSG00000198939	ZFP2
ENSG00000229867.2	17.8011	-0.0933425	0.91679	-0.101814	0.918904	0.999937	ENSG00000229867	STEAP3-AS1
ENSG00000226065.1	17.8165	1.78169	3.82124	0.466261	0.641028	0.999937	ENSG00000226065	ZBTB45P2
ENSG00000064655.19	17.8197	0.468667	0.956907	0.489773	0.624294	0.999937	ENSG00000064655	EYA2
ENSG00000088756.13	17.8299	0.744204	0.96106	0.774357	0.43872	0.999937	ENSG00000088756	ARHGAP28
ENSG00000244701.1	17.83	0.276557	0.907161	0.30486	0.760473	0.999937	ENSG00000244701	AC004918.1
ENSG00000211891.6	17.8374	3.58469	1.36913	2.61822	0.00883906	0.999937	ENSG00000211891	IGHE
ENSG00000205885.7	17.8391	-0.354383	0.917551	-0.386227	0.699328	0.999937	ENSG00000205885	C1RL-AS1
ENSG00000136114.17	17.8428	-0.426224	0.935485	-0.455618	0.648665	0.999937	ENSG00000136114	THSD1
ENSG00000225864.1	17.8471	-0.278427	0.917253	-0.303544	0.761475	0.999937	ENSG00000225864	AL645939.2
ENSG00000188064.10	17.8504	0.466629	1.04219	0.44774	0.654341	0.999937	ENSG00000188064	WNT7B
ENSG00000262155.2	17.8506	-0.104842	0.947663	-0.110632	0.911908	0.999937	ENSG00000262155	LINC02175
ENSG00000203620.2	17.863	2.71568	0.993505	2.73343	0.00626783	0.999937	ENSG00000203620	AL354919.1
ENSG00000168306.13	17.8656	0.329096	0.960179	0.342744	0.731791	0.999937	ENSG00000168306	ACOX2
ENSG00000281357.3	17.8776	-0.830685	0.939619	-0.884066	0.376661	0.999937	ENSG00000281357	ARRDC3-AS1
ENSG00000233033.1	17.8808	0.0534392	0.965133	0.0553698	0.955844	0.999937	ENSG00000233033	CASK-AS1
ENSG00000284946.1	17.8822	0.423752	1.03127	0.410901	0.681145	0.999937	ENSG00000284946	AC068831.6
ENSG00000150722.10	17.8908	0.291271	0.928651	0.31365	0.753787	0.999937	ENSG00000150722	PPP1R1C
ENSG00000164794.9	17.8928	1.91847	1.05044	1.82635	0.0677972	0.999937	ENSG00000164794	KCNV1
ENSG00000255750.6	17.8951	-0.31991	0.915203	-0.34955	0.726676	0.999937	ENSG00000255750	AC022509.1
ENSG00000163701.19	17.9037	0.141282	0.932969	0.151432	0.879635	0.999937	ENSG00000163701	IL17RE
ENSG00000266872.1	17.9068	1.16783	0.930341	1.25528	0.209379	0.999937	ENSG00000266872	AC015688.6
ENSG00000005981.13	17.9102	0.512169	0.931243	0.549984	0.58233	0.999937	ENSG00000005981	ASB4
ENSG00000152785.7	17.9159	1.26027	1.13509	1.11028	0.266877	0.999937	ENSG00000152785	BMP3
ENSG00000161405.17	17.9169	3.80382	1.41543	2.68739	0.00720126	0.999937	ENSG00000161405	IKZF3
ENSG00000182584.6	17.9286	1.47734	1.02797	1.43715	0.150676	0.999937	ENSG00000182584	ACTL10
ENSG00000112218.9	17.9476	0.218194	0.912246	0.239184	0.810963	0.999937	ENSG00000112218	GPR63
ENSG00000261200.1	17.9532	2.00249	1.39762	1.43279	0.151918	0.999937	ENSG00000261200	AC136944.2
ENSG00000182308.7	17.9536	0.982482	0.92866	1.05796	0.290075	0.999937	ENSG00000182308	DCAF4L1
ENSG00000269918.1	17.9626	0.737211	0.94677	0.778659	0.43618	0.999937	ENSG00000269918	AF131215.6
ENSG00000163032.12	17.9674	0.426524	0.925962	0.460628	0.645065	0.999937	ENSG00000163032	VSNL1
ENSG00000111837.12	17.9692	0.669147	0.922687	0.725215	0.46832	0.999937	ENSG00000111837	MAK
ENSG00000230074.3	17.9706	-0.123683	0.907592	-0.136276	0.891603	0.999937	ENSG00000230074	AL162231.2
ENSG00000255850.2	17.9754	-0.0351132	0.943909	-0.0371998	0.970326	0.999937	ENSG00000255850	RXYLT1-AS1
ENSG00000141485.17	18.0046	0.62915	1.10831	0.567665	0.570263	0.999937	ENSG00000141485	SLC13A5
ENSG00000158292.7	18.0047	0.440062	0.956778	0.459941	0.645558	0.999937	ENSG00000158292	GPR153
ENSG00000025423.11	18.0066	-0.0191455	0.995173	-0.0192384	0.984651	0.999937	ENSG00000025423	HSD17B6
ENSG00000242628.6	18.0079	0.0539994	1.1593	0.0465793	0.962849	0.999937	ENSG00000242628	AC009228.1
ENSG00000229358.3	18.0193	-0.450934	0.919235	-0.490553	0.623742	0.999937	ENSG00000229358	DPY19L1P1
ENSG00000167912.6	18.0337	0.441618	0.949624	0.465045	0.641899	0.999937	ENSG00000167912	AC090152.1
ENSG00000234494.7	18.0385	0.646077	0.942295	0.685642	0.492939	0.999937	ENSG00000234494	SP2-AS1
ENSG00000256569.1	18.0395	0.10123	0.939759	0.107719	0.914219	0.999937	ENSG00000256569	AC069234.3
ENSG00000228192.8	18.0412	-0.731664	0.979585	-0.746913	0.455116	0.999937	ENSG00000228192	AL512353.1
ENSG00000258708.1	18.0464	0.412076	0.966972	0.426151	0.669998	0.999937	ENSG00000258708	SLC25A21-AS1
ENSG00000131188.12	18.0464	1.11909	1.01381	1.10385	0.26966	0.999937	ENSG00000131188	PRR7
ENSG00000144031.12	18.0468	-0.386837	0.928112	-0.4168	0.676825	0.999937	ENSG00000144031	ANKRD53
ENSG00000287906.1	18.047	0.895735	1.19571	0.749121	0.453784	0.999937	ENSG00000287906	AC127526.5
ENSG00000134201.12	18.0492	-0.835224	0.953864	-0.875622	0.381236	0.999937	ENSG00000134201	GSTM5
ENSG00000188897.9	18.0544	1.55976	1.19479	1.30547	0.191733	0.999937	ENSG00000188897	AC099489.1
ENSG00000151062.15	18.0693	0.836541	1.00392	0.833275	0.40469	0.999937	ENSG00000151062	CACNA2D4
ENSG00000287202.1	18.07	-0.103656	0.916988	-0.11304	0.909999	0.999937	ENSG00000287202	AC008119.1
ENSG00000269973.1	18.0719	1.59624	0.955473	1.67062	0.0947962	0.999937	ENSG00000269973	AC010969.2
ENSG00000276131.1	18.074	0.148628	0.904588	0.164305	0.869491	0.999937	ENSG00000276131	AC009118.2
ENSG00000160111.14	18.0752	-0.239651	0.916266	-0.261552	0.793667	0.999937	ENSG00000160111	CPAMD8
ENSG00000099769.6	18.0793	-0.212515	0.985447	-0.215653	0.829258	0.999937	ENSG00000099769	IGFALS
ENSG00000246560.2	18.0803	0.810585	0.928584	0.872926	0.382704	0.999937	ENSG00000246560	UBE2D3-AS1
ENSG00000284968.1	18.0824	1.17817	0.94473	1.2471	0.212361	0.999937	ENSG00000284968	AC093827.4
ENSG00000268903.1	18.0964	0.208029	1.07976	0.192662	0.847224	0.999937	ENSG00000268903	AL627309.6
ENSG00000245067.7	18.0977	0.642346	0.976887	0.657543	0.510832	0.999937	ENSG00000245067	IGFBP7-AS1
ENSG00000089163.4	18.1246	-0.502614	0.949064	-0.52959	0.596397	0.999937	ENSG00000089163	SIRT4
ENSG00000285867.1	18.1309	0.597532	0.912725	0.654668	0.512681	0.999937	ENSG00000285867	BX470102.2
ENSG00000197168.13	18.1318	-0.0635939	0.915989	-0.0694264	0.94465	0.999937	ENSG00000197168	NEK5
ENSG00000162078.11	18.1355	0.0913024	0.996795	0.091596	0.927019	0.999937	ENSG00000162078	ZG16B
ENSG00000249464.6	18.1377	0.214019	0.899214	0.238006	0.811876	0.999937	ENSG00000249464	LINC01091
ENSG00000204128.6	18.145	0.623562	0.954492	0.653292	0.513568	0.999937	ENSG00000204128	C2orf72
ENSG00000165300.7	18.1513	0.825261	1.22272	0.674941	0.499713	0.999937	ENSG00000165300	SLITRK5
ENSG00000269399.2	18.1618	0.80996	1.02346	0.791397	0.428712	0.999937	ENSG00000269399	AC008764.6
ENSG00000239883.8	18.1703	-0.600897	0.914195	-0.657296	0.510991	0.999937	ENSG00000239883	PARGP1
ENSG00000176678.6	18.1777	1.55972	1.04321	1.49511	0.134887	0.999937	ENSG00000176678	FOXL1
ENSG00000226891.9	18.1823	0.0454914	0.962073	0.0472848	0.962286	0.999937	ENSG00000226891	LINC01359
ENSG00000273079.6	18.1904	2.12756	1.08822	1.95508	0.0505734	0.999937	ENSG00000273079	GRIN2B
ENSG00000183308.6	18.215	-0.134195	0.919234	-0.145986	0.883933	0.999937	ENSG00000183308	AC005037.1
ENSG00000185065.6	18.2157	0.74553	0.920387	0.810018	0.41793	0.999937	ENSG00000185065	AC000068.1
ENSG00000185261.14	18.2399	0.269262	0.898147	0.299798	0.764331	0.999937	ENSG00000185261	KIAA0825
ENSG00000160447.7	18.2437	-0.126019	0.899764	-0.140058	0.888614	0.999937	ENSG00000160447	PKN3
ENSG00000187372.11	18.2587	1.09502	0.928157	1.17978	0.238089	0.999937	ENSG00000187372	PCDHB13
ENSG00000198416.9	18.2613	-0.221936	0.952225	-0.233071	0.815706	0.999937	ENSG00000198416	ZNF658B
ENSG00000220848.5	18.2711	0.74774	0.912778	0.819191	0.412677	0.999937	ENSG00000220848	RPS18P9
ENSG00000228606.3	18.2929	-0.371479	0.928575	-0.400053	0.689118	0.999937	ENSG00000228606	AL139011.1
ENSG00000249715.12	18.2937	0.659544	0.99185	0.664964	0.506074	0.999937	ENSG00000249715	FER1L5
ENSG00000273064.1	18.2968	0.449224	0.981835	0.457535	0.647286	0.999937	ENSG00000273064	AC017083.1
[truncated: 15,405 more rows]
